# Supplementary material for: Leveraging chromatin accessibility for transcriptional regulatory network inference in T Helper 17 Cells
Source: PubMed Central journal article supplement (PMC6396413; doi:10.1101/gr.238253.118), 2019-03
Supplement: supp_gr.238253.118_Supplemental_Fig_S1.pdf [file supp_gr.238253.118_Supplemental_Fig_S1.pdf]

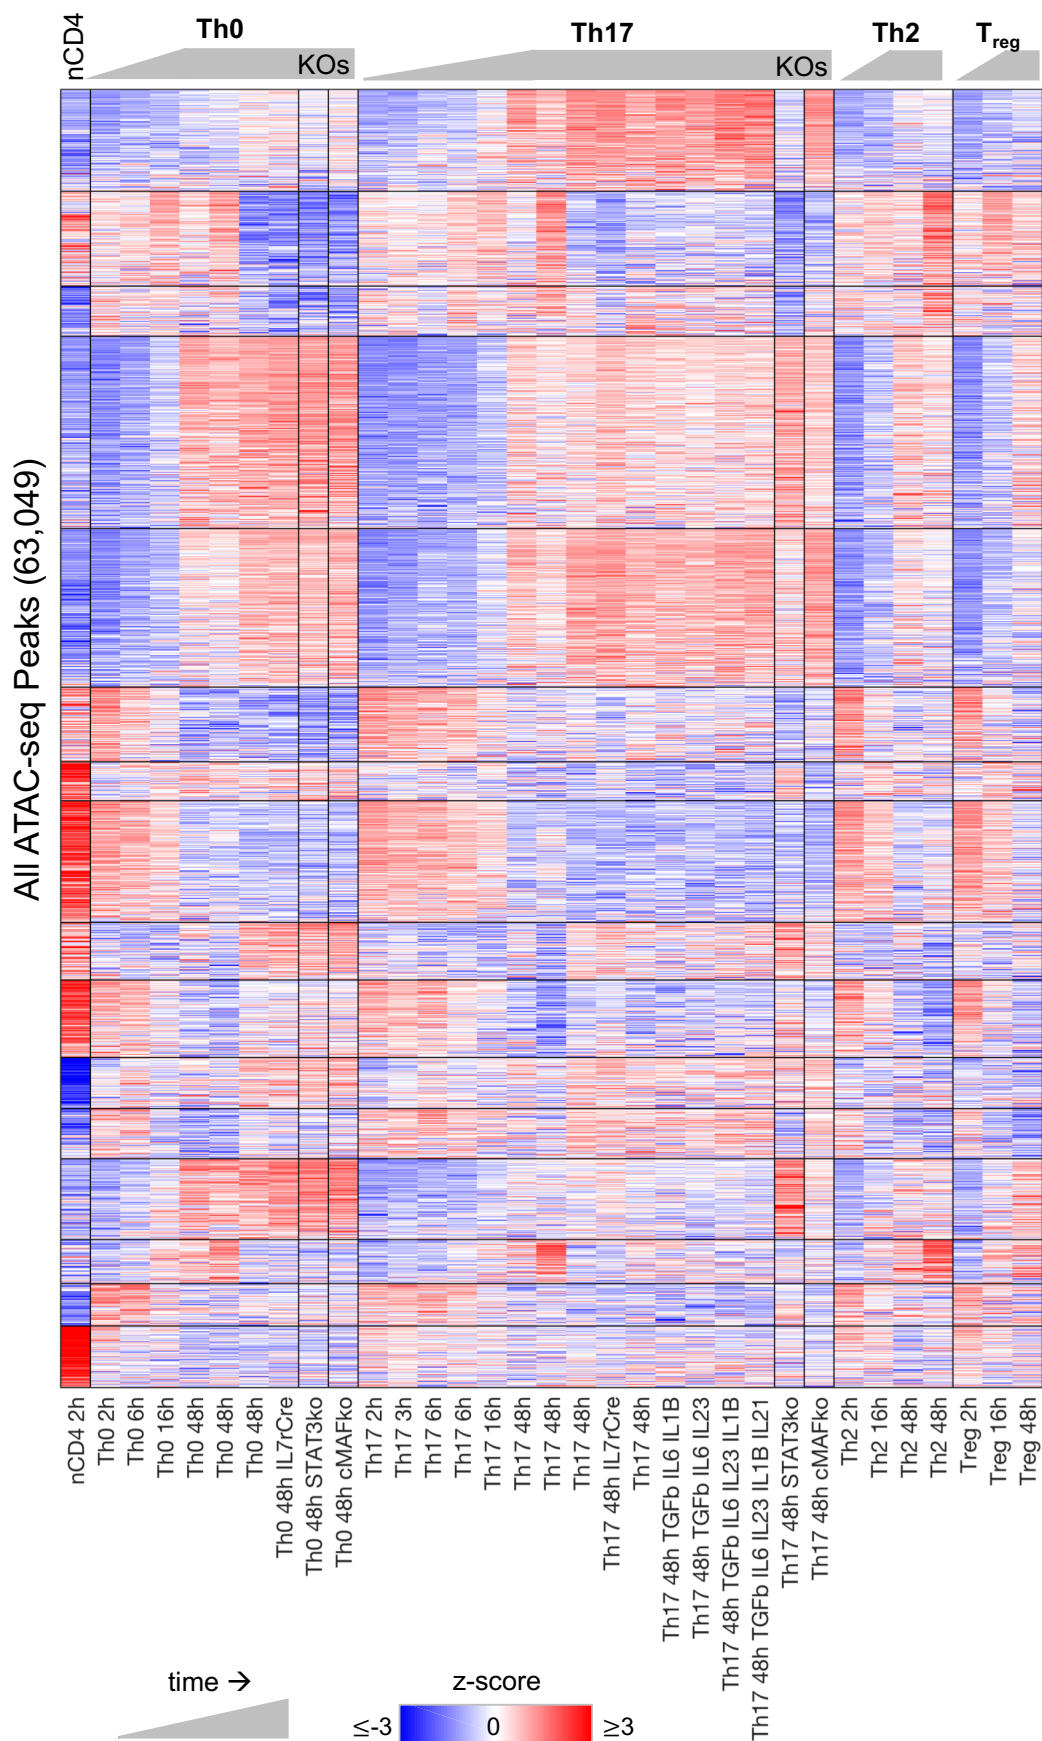

**Figure S1. Clustering of all 63,049 peaks in the ATAC-seq dataset.** ATAC-seq peak intensities were robustly normalized (DESeq2), z-scored and clustered using K-means clustering with Euclidean distance. Samples were ordered according to treatment condition and timepoint.
