# Supplementary material for: Leveraging chromatin accessibility for transcriptional regulatory network inference in T Helper 17 Cells
Source: PubMed Central journal article supplement (PMC6396413; doi:10.1101/gr.238253.118), 2019-03
Supplement: supp_gr.238253.118_Supplemental_Fig_S3.pdf [file supp_gr.238253.118_Supplemental_Fig_S3.pdf]

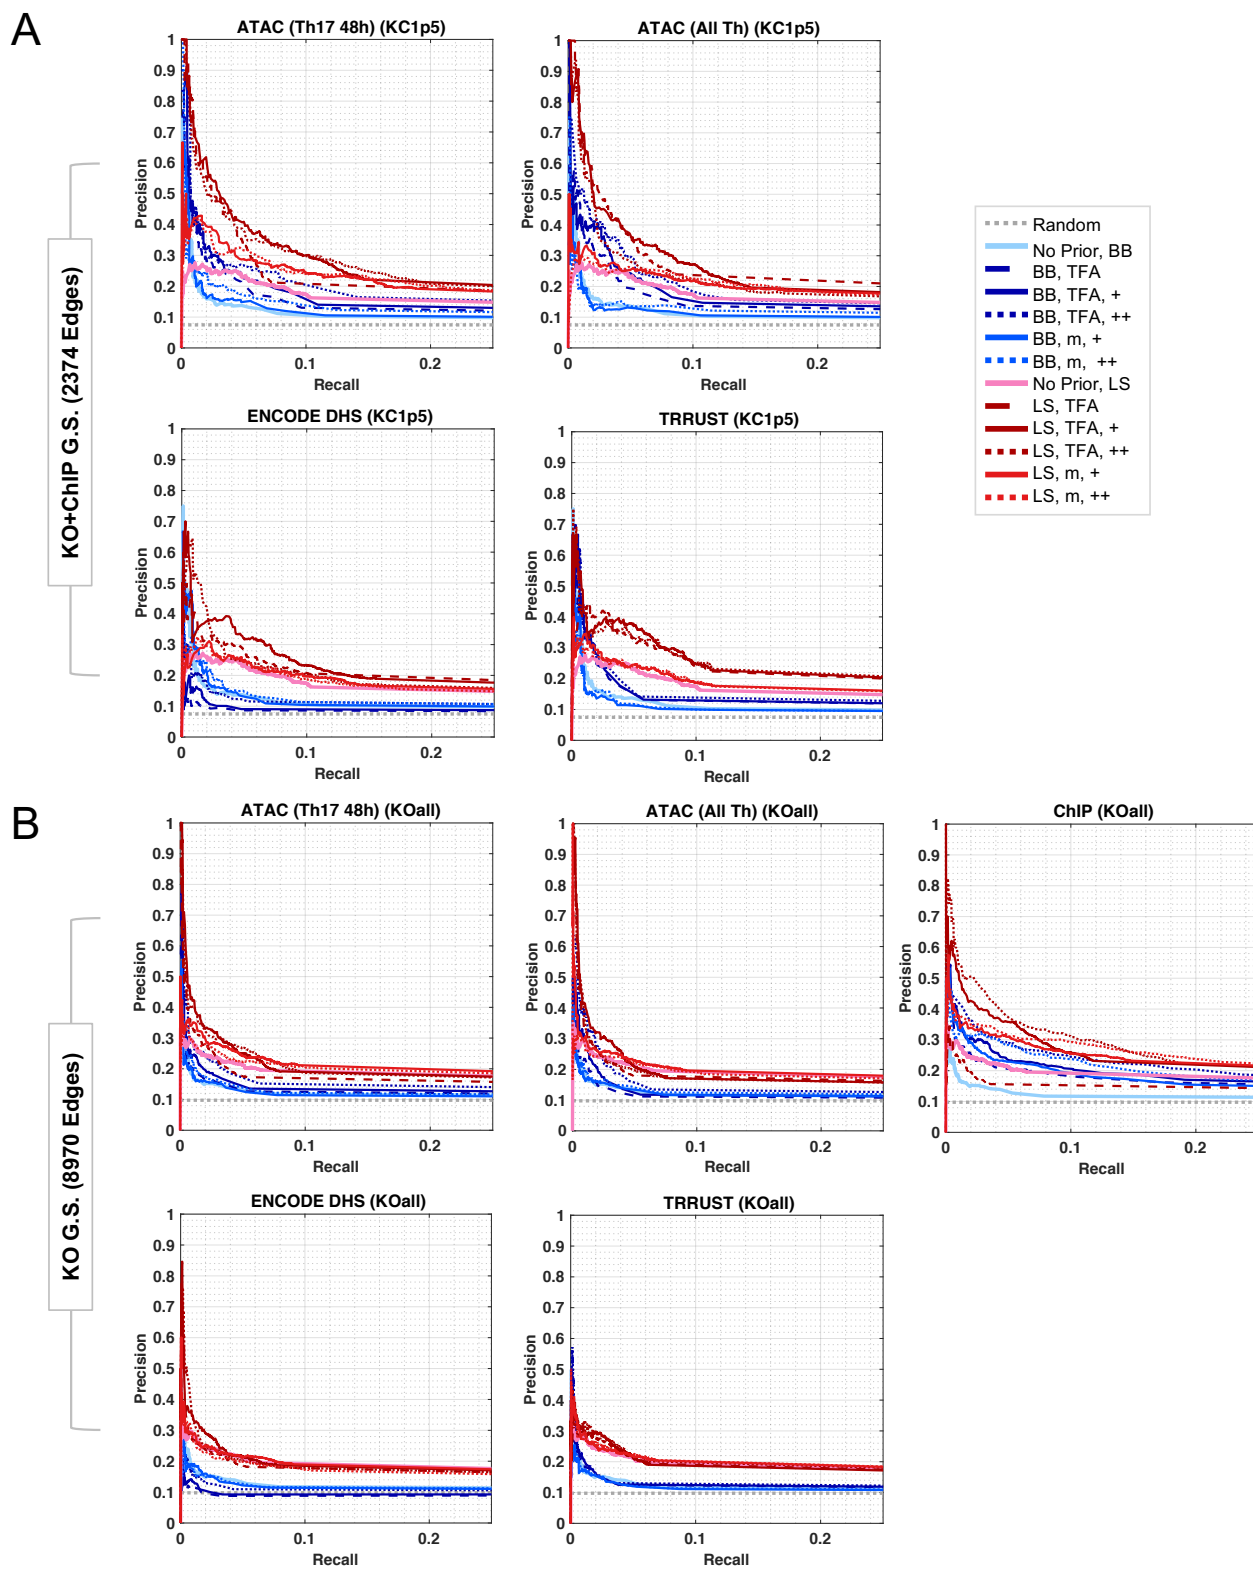

**Figure S3. Precision-recall of multiple priors, Gold Standard = KO+ChIP (A) or KO (B).** For each prior, the performance is plotted for several TRNs, based on *Inferelator* method (LS = mLASSO-StARS (reds), BB = BBSR-BIC (blues)), TFA estimation method (m = TF mRNA, TFA = P<sup>+</sup>X), and strength of prior reinforcement (none, moderate (+), and strong (++)). Random and “No Prior” control TRNs serve as references in all panels.
