# Supplementary material for: Leveraging chromatin accessibility for transcriptional regulatory network inference in T Helper 17 Cells
Source: PubMed Central journal article supplement (PMC6396413; doi:10.1101/gr.238253.118), 2019-03
Supplement: supp_gr.238253.118_Supplemental_Fig_S5.pdf [file supp_gr.238253.118_Supplemental_Fig_S5.pdf]

A

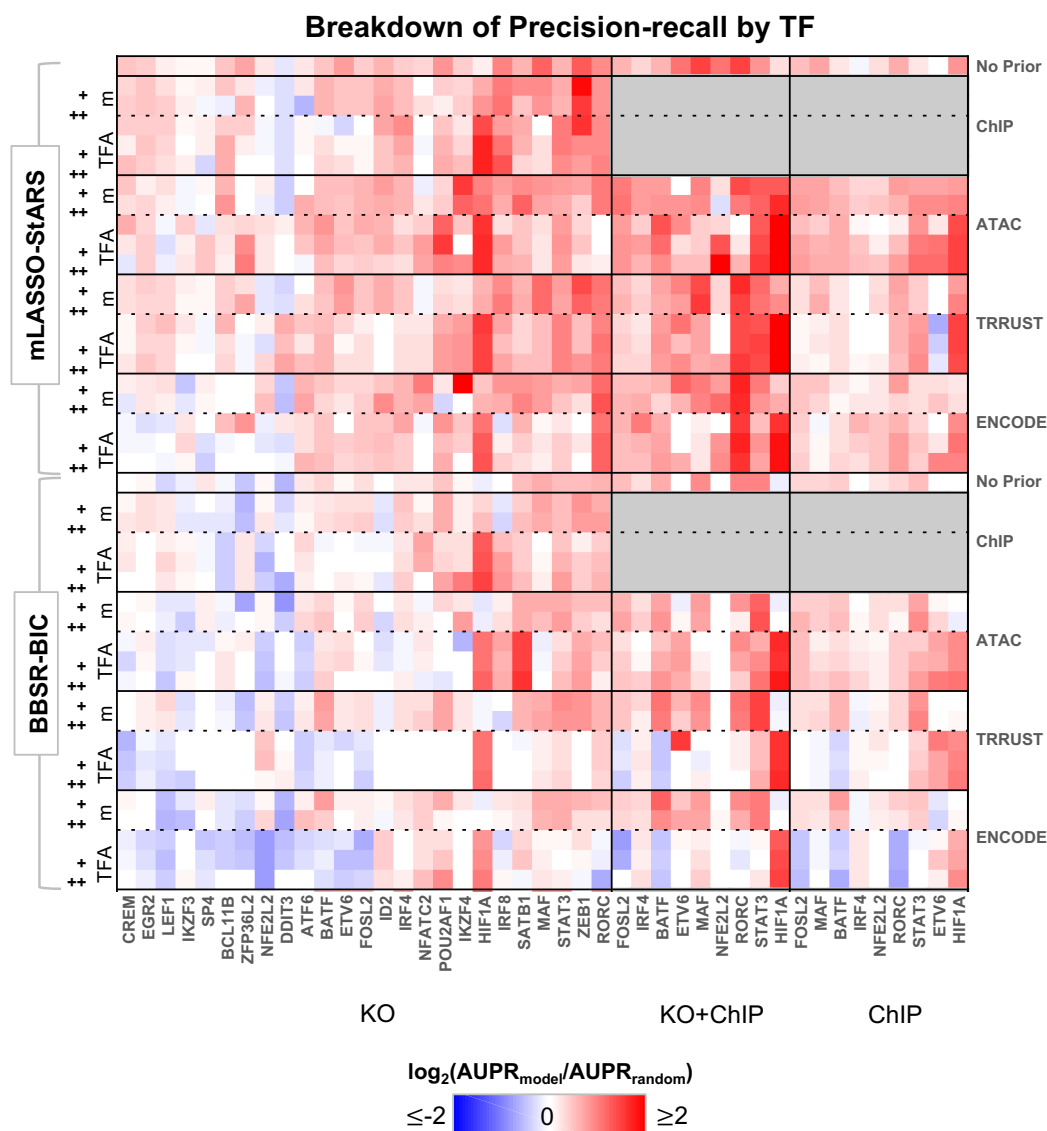

B

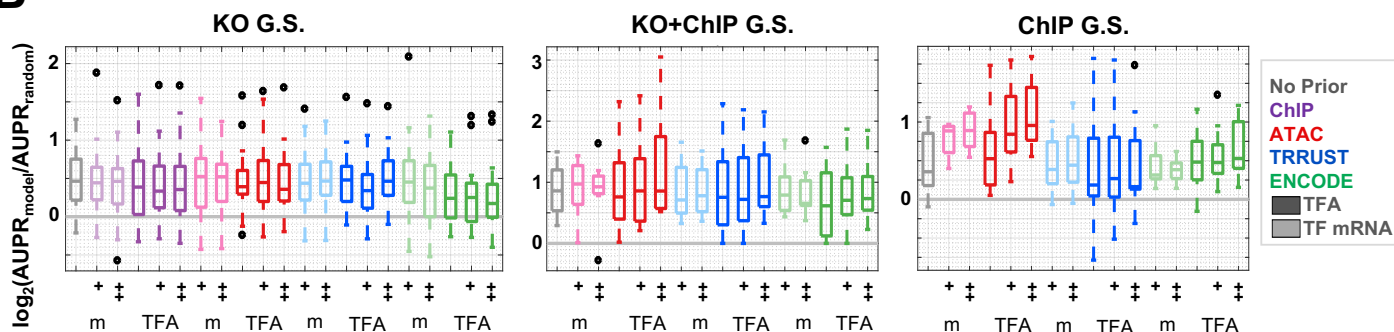

**Figure S5. TF-specific TRN performance for mLASSO-StARS and BBSR-BIC. (A)** For each G.S., AUPRs were calculated for each TF individually. TF-specific performance of TRNs is quantified as the  $\log_2$ -foldchange between AUPR of the TRN model relative to random. “+” indicates strength of prior reinforcement, and “m” and “TFA” denote TFA estimation from TF mRNA and prior-based TFA, respectively. **(B)** Boxplots of per-TF AUPRs for mLASSO-StARS models in **(A)**; central mark indicates median, box edges indicate the 25<sup>th</sup> and 75<sup>th</sup> percentiles, and the whiskers extend to the most extreme data points not considered outliers ( $\pm 2.7$  standard deviations from the mean).
