# Supplementary material for: Leveraging chromatin accessibility for transcriptional regulatory network inference in T Helper 17 Cells
Source: PubMed Central journal article supplement (PMC6396413; doi:10.1101/gr.238253.118), 2019-03
Supplement: supp_gr.238253.118_Supplemental_Fig_S6.pdf [file supp_gr.238253.118_Supplemental_Fig_S6.pdf]

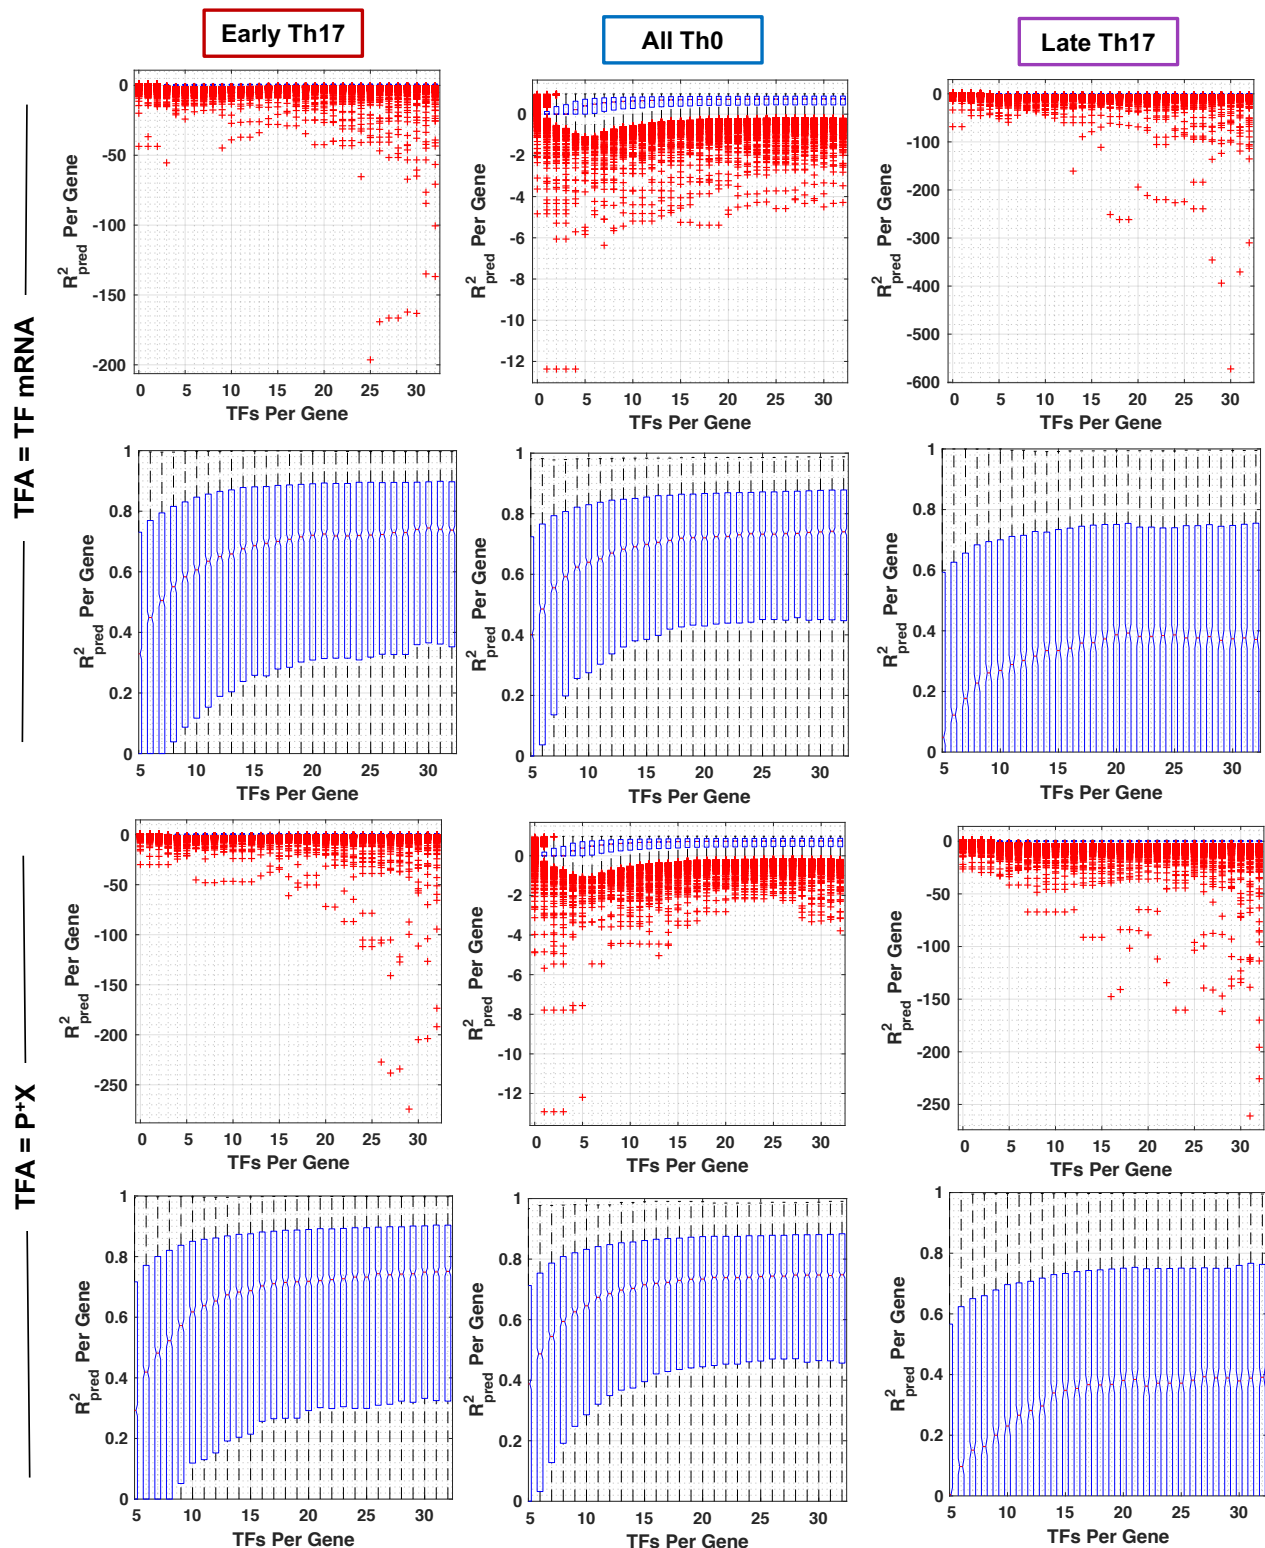

**Figure S6. Distributions of per-gene  $R^2_{\text{pred}}$  values.** Full and zoomed-in boxplots of per-gene  $R^2_{\text{pred}}$  values for the Th17 ATAC prior, bias = .5 and TFA = TF mRNA or prior-based TFA (TFA = P+X). The central red mark indicates median, the bottom and top edges of the blue box indicate the 25<sup>th</sup> and 75<sup>th</sup> percentiles, and the whiskers extend to the most extreme data points not considered outliers ( $\pm 2.7$  standard deviations from the mean). x-axis indicates the average number of TFs per gene at each model-size cutoff.
