# Supplementary material for: Leveraging chromatin accessibility for transcriptional regulatory network inference in T Helper 17 Cells
Source: PubMed Central journal article supplement (PMC6396413; doi:10.1101/gr.238253.118), 2019-03
Supplement: supp_gr.238253.118_Supplemental_Fig_S19.pdf [file supp_gr.238253.118_Supplemental_Fig_S19.pdf]

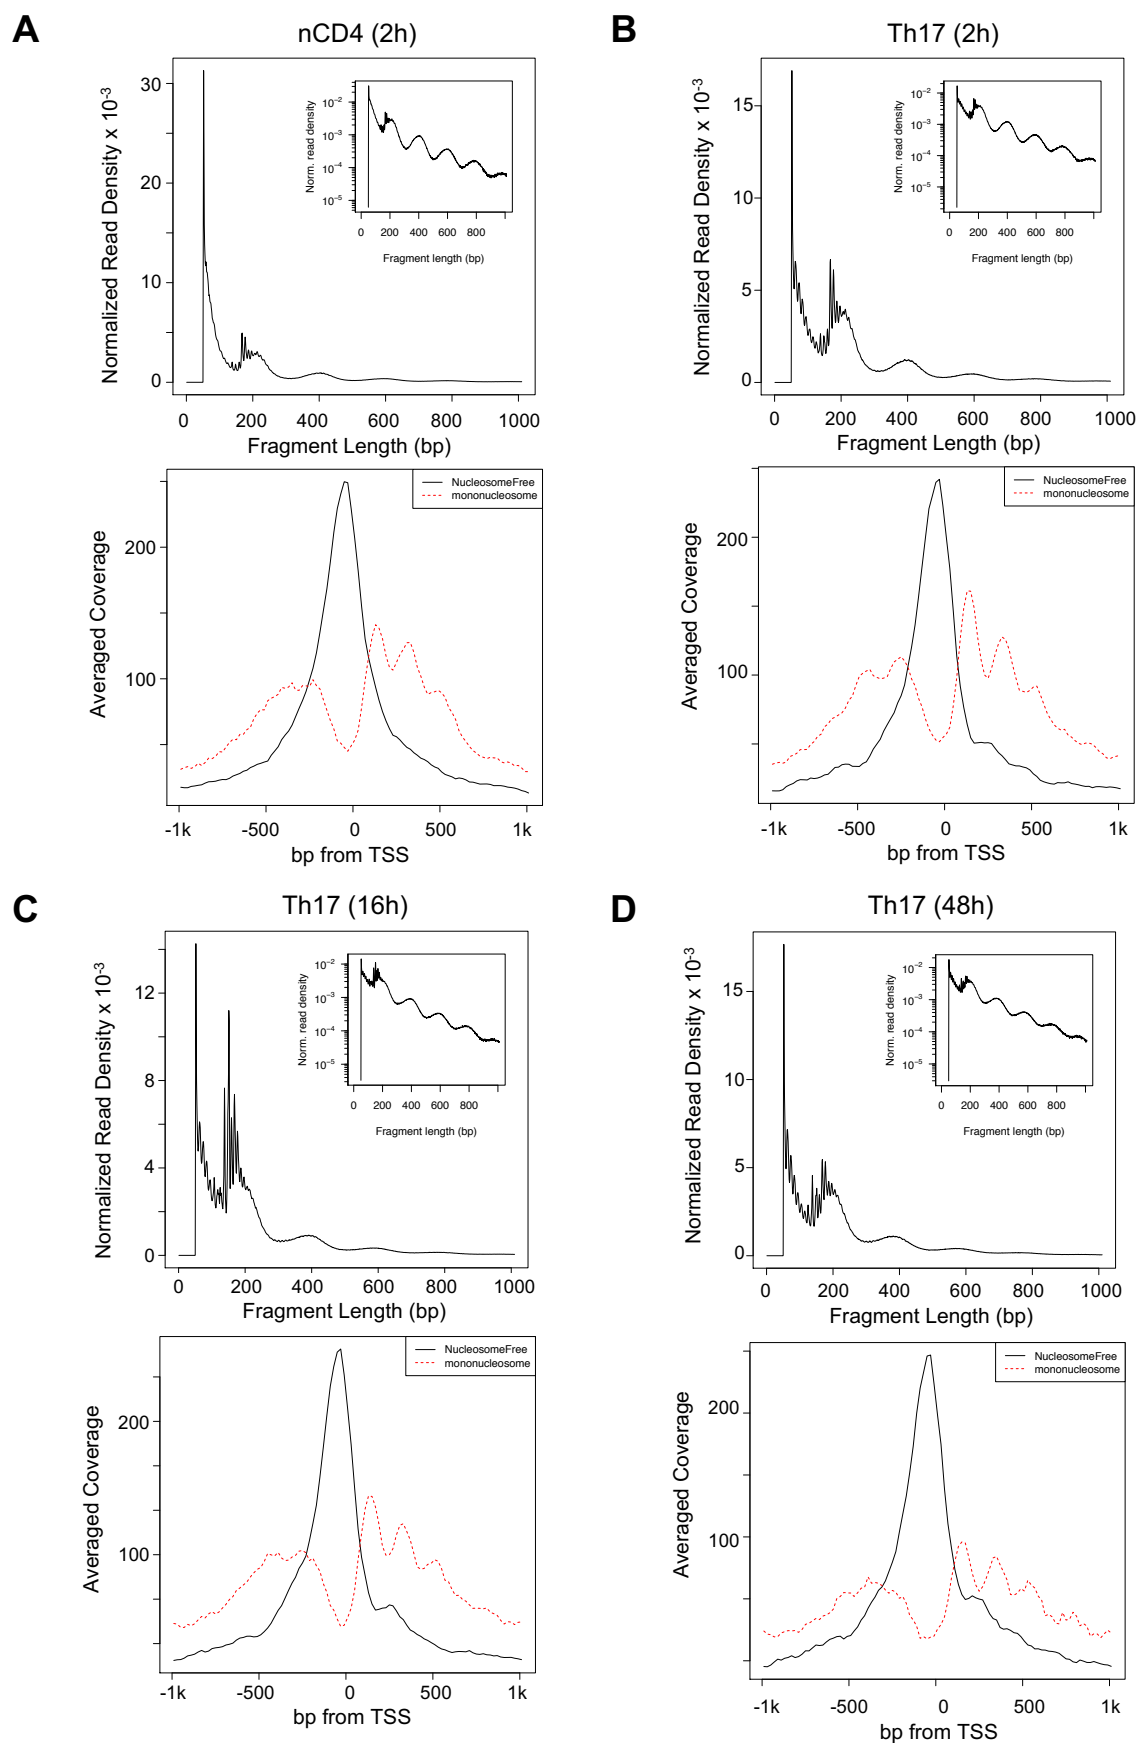

**Figure S19.** Representative outputs from ATACseqQC, displaying nucleosome-length periodicity in fragment lengths and signal distribution at the TSS for (A) naive CD4 T cells (2h), (B) Th17 (2h), (C) Th17 (16h), and (D) Th17 (48h).
