# Supplementary material for: Leveraging chromatin accessibility for transcriptional regulatory network inference in T Helper 17 Cells
Source: PubMed Central journal article supplement (PMC6396413; doi:10.1101/gr.238253.118), 2019-03
Supplement: supp_gr.238253.118_Supplemental_Fig_S21.pdf [file supp_gr.238253.118_Supplemental_Fig_S21.pdf]

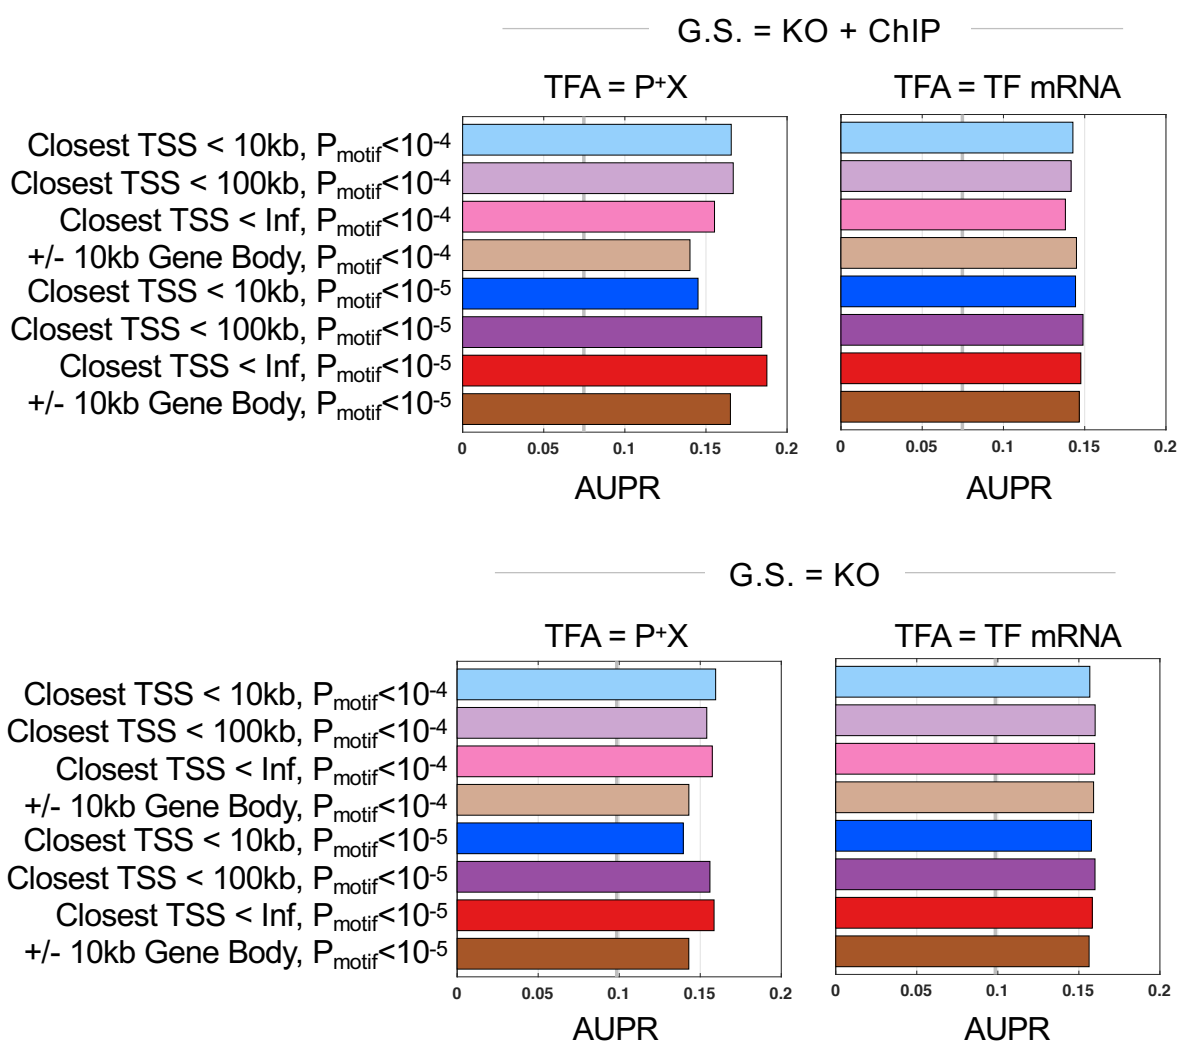

**Figure S21. Comparison of peak-gene association rules.** Th17 ATAC-seq priors were constructed using different peak-gene association rules and two raw p-value cutoffs for motifs from CisBP (note that ENCODE motifs were not included in this analysis). mLASSO-StARS was run with TF mRNA or prior-based TFA at bias = .5. (Inf = infinity.)
