# Supplementary material for: Leveraging chromatin accessibility for transcriptional regulatory network inference in T Helper 17 Cells
Source: PubMed Central journal article supplement (PMC6396413; doi:10.1101/gr.238253.118), 2019-03
Supplement: supp_gr.238253.118_Supplemental_Fig_S22.pdf [file supp_gr.238253.118_Supplemental_Fig_S22.pdf]

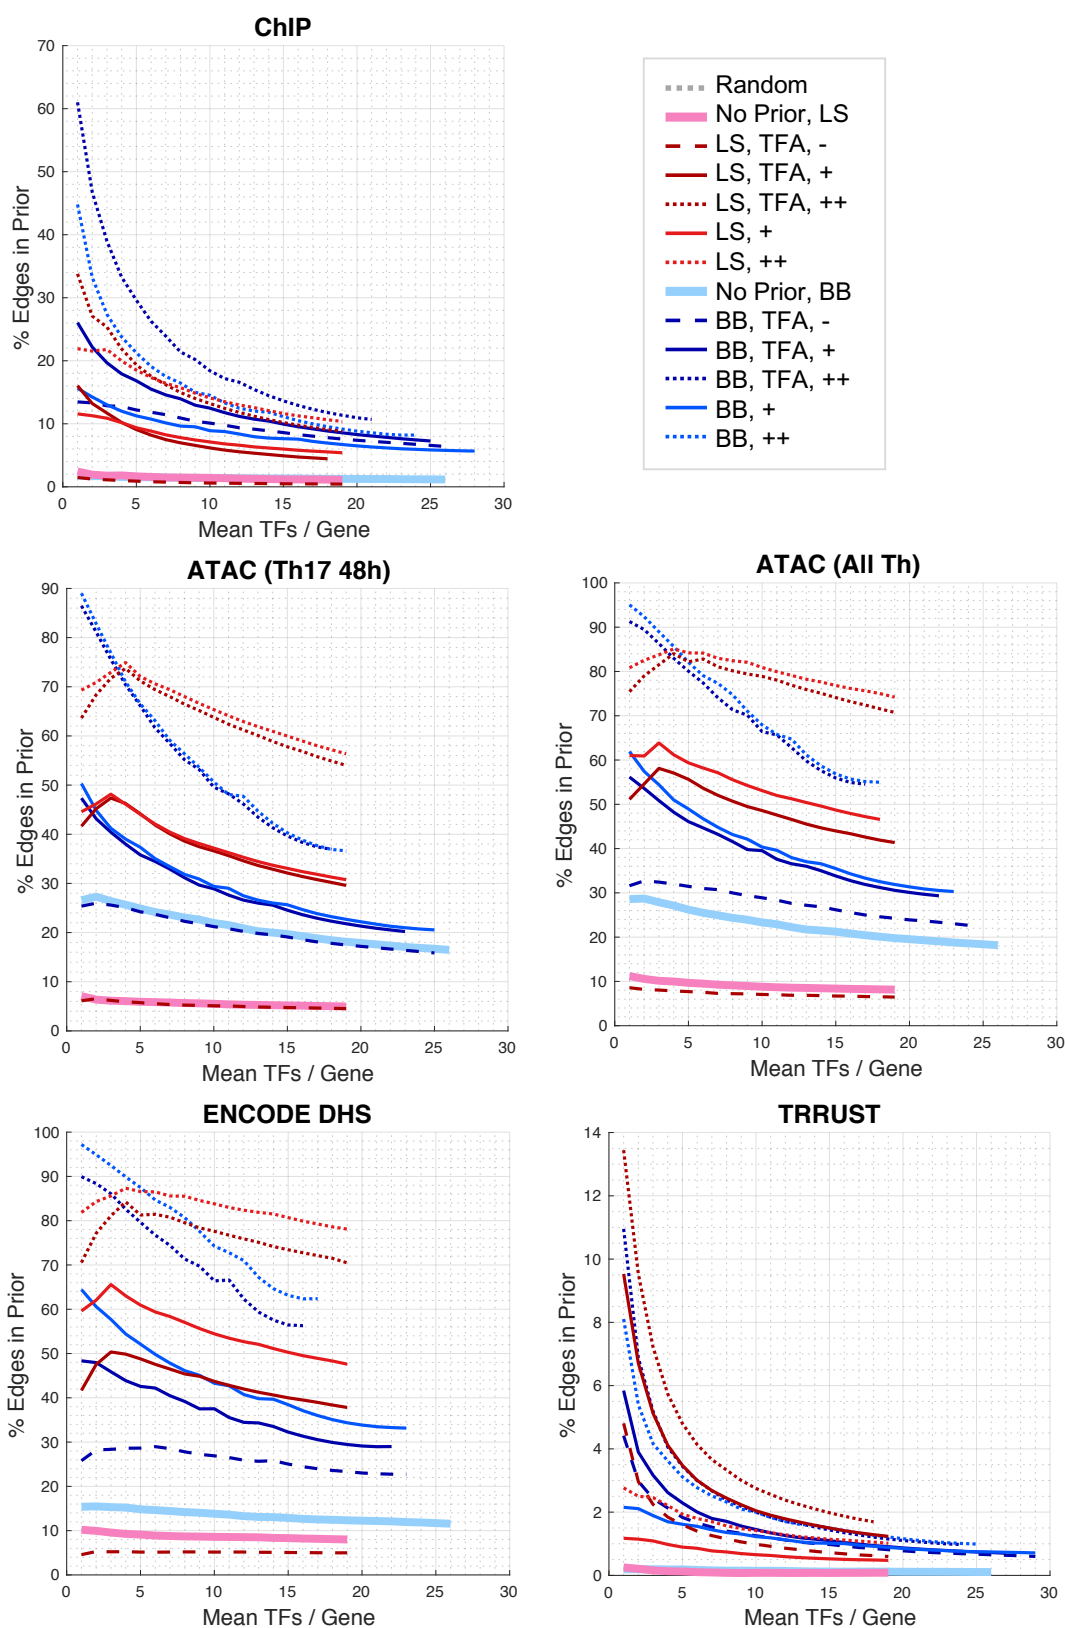

**Figure S22. The effect of TFA and prior reinforcement on recovery of prior edges in TRN models.** % prior edges in the TRNs are plotted as a function of TRN size (mean TF predictors per gene) for the two Inferelator methods (BBSR-BIC and mLASSO-StARS), the two methods for estimating TF activities (TFA = P+X and TF mRNA), and varying levels of prior reinforcement (-, +, ++ correspond to no, moderate, and high prior reinforcement, respectively).
