# Supplementary material for: Leveraging chromatin accessibility for transcriptional regulatory network inference in T Helper 17 Cells
Source: PubMed Central journal article supplement (PMC6396413; doi:10.1101/gr.238253.118), 2019-03
Supplement: supp_gr.238253.118_Supplemental_Fig_S24.pdf [file supp_gr.238253.118_Supplemental_Fig_S24.pdf]

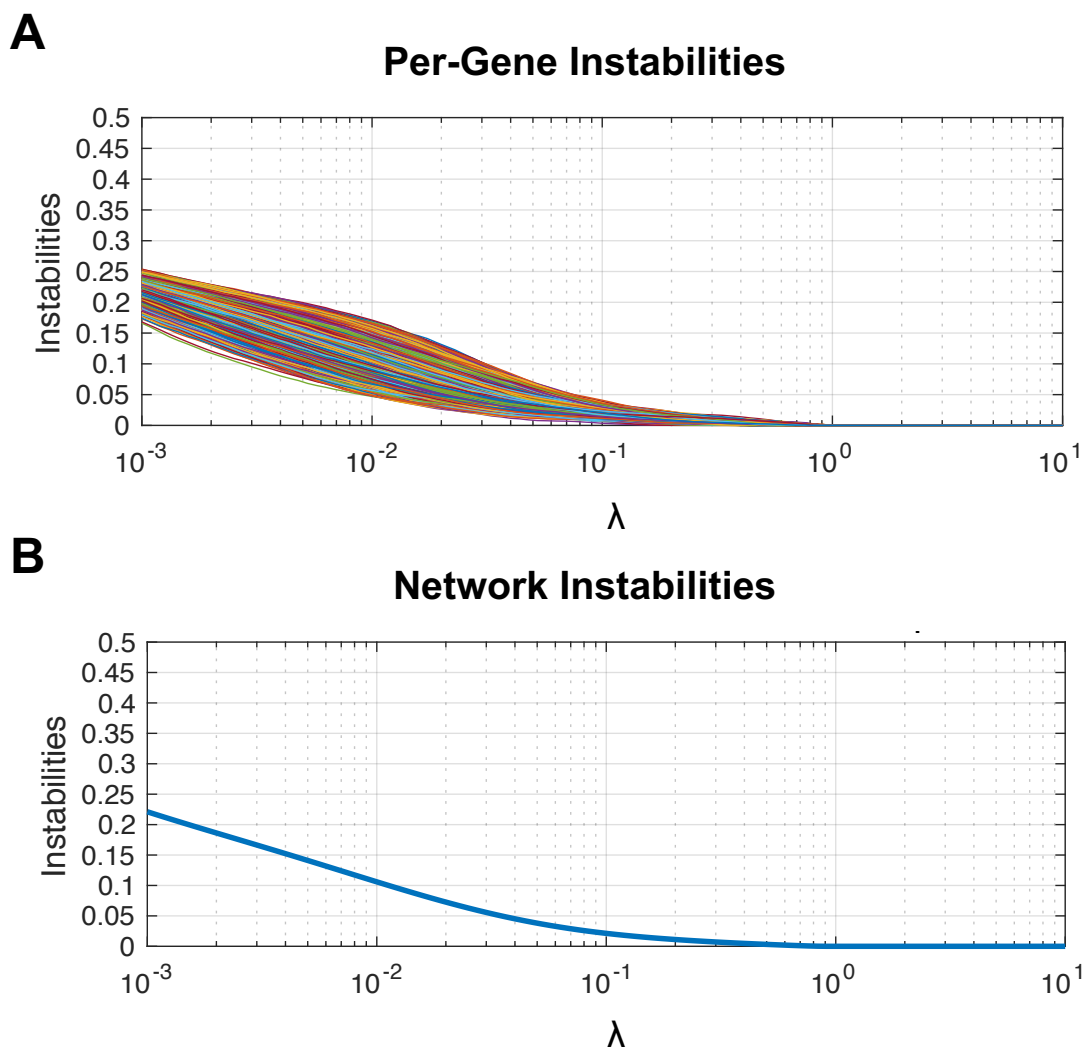

**Figure S24. (A) Per-gene and (B) network-level average instability paths.** Average instabilities were calculated on per-gene and network level over a range of LASSO penalties,  $\lambda$ . Results are shown for the No Prior TRN using 50 subsamples.
