# Supplementary material for: Leveraging chromatin accessibility for transcriptional regulatory network inference in T Helper 17 Cells
Source: PubMed Central journal article supplement (PMC6396413; doi:10.1101/gr.238253.118), 2019-03
Supplement: supp_gr.238253.118_Supplemental_Fig_S25.pdf [file supp_gr.238253.118_Supplemental_Fig_S25.pdf]

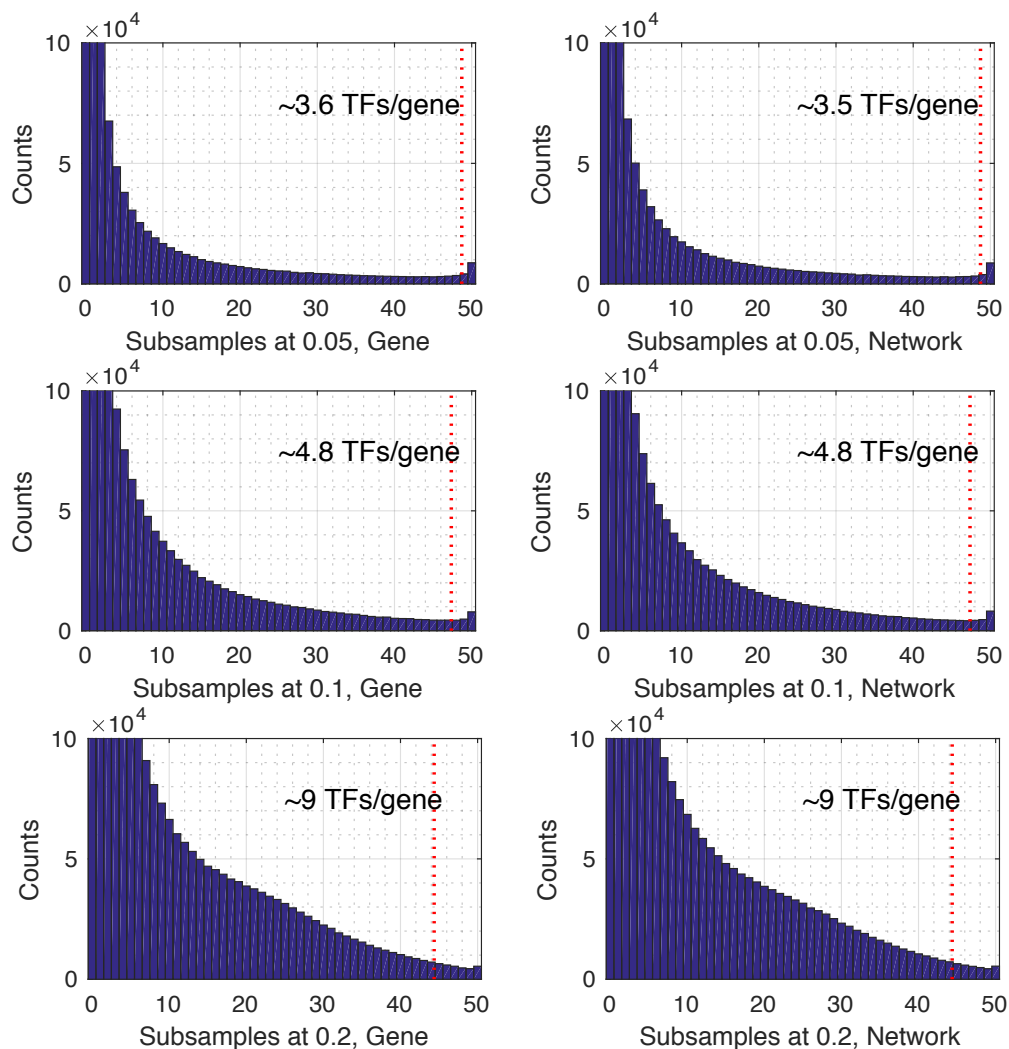

**Figure S25. Distribution of nonzero subsamples per TF-gene edge.** Distribution of nonzero subsamples per TF-gene interaction, using per-gene and network average instability cutoffs of .05, .1, and .2. Results are shown for the No Prior TRN using 50 subsamples. The dotted-red line marks the instability cutoff in terms of nonzero subsamples, and the average model size at that cutoff appears as text in the upper right hand.
