# Supplementary material for: Leveraging chromatin accessibility for transcriptional regulatory network inference in T Helper 17 Cells
Source: PubMed Central journal article supplement (PMC6396413; doi:10.1101/gr.238253.118), 2019-03
Supplement: supp_gr.238253.118_Supplemental_Fig_S26.pdf [file supp_gr.238253.118_Supplemental_Fig_S26.pdf]

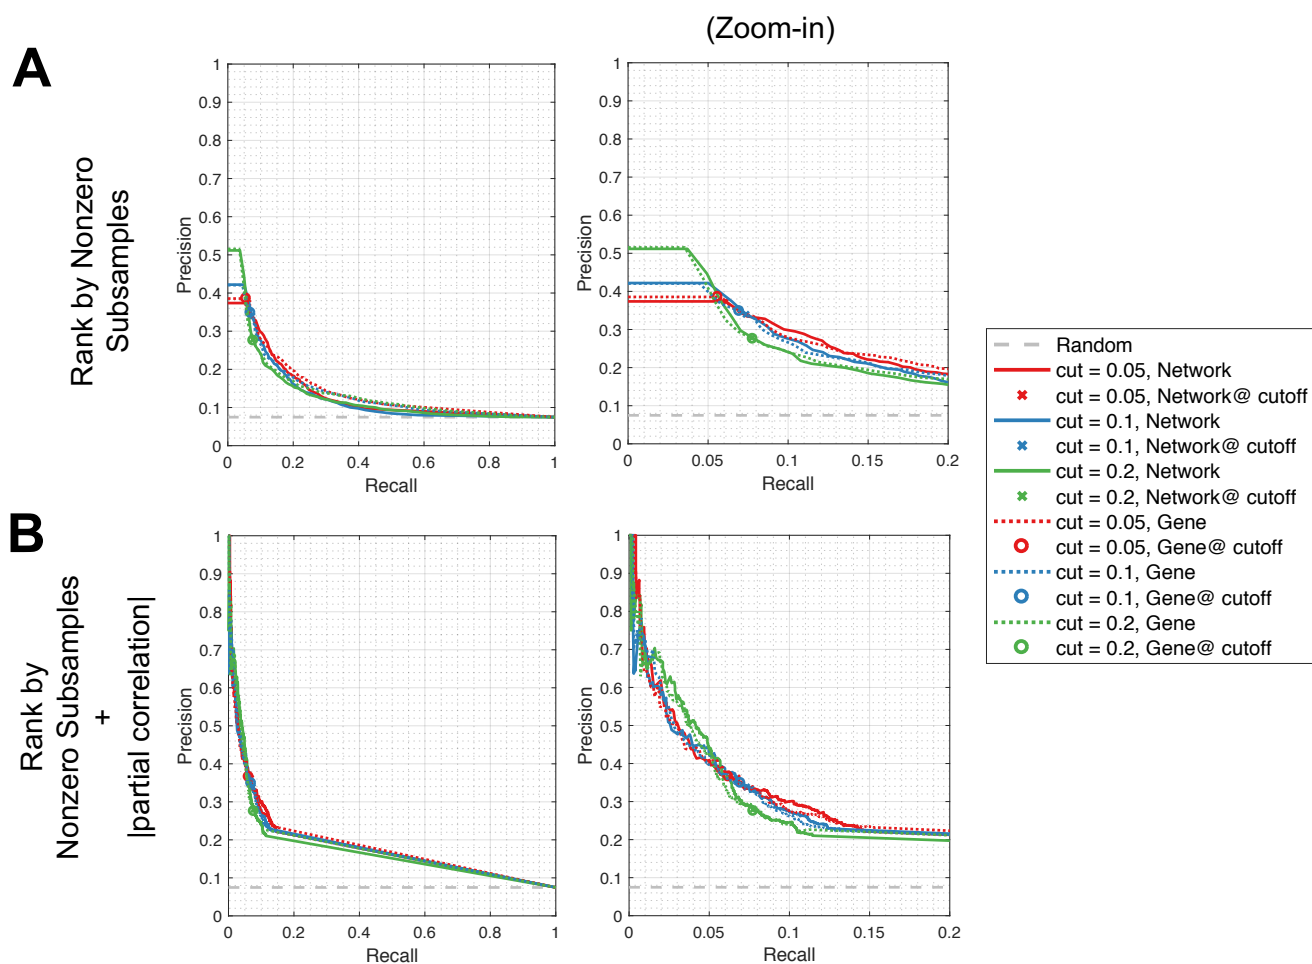

**Figure S26. Comparison of edge-ranking methods.** Edges are ranked according to **(A)** nonzero subsamples or **(B)** nonzero subsamples plus the absolute value of edge partial correlation (Equation 4) for network- and gene-level average instabilities at cutoffs .05, .1 and .2. Right and left panels denote full and zoomed-in curves, respectively. Results are shown for the Th17 ATAC prior, bias = .5, and prior-based TFA, using the KO + ChIP G.S.
