# Supplementary material for: Leveraging chromatin accessibility for transcriptional regulatory network inference in T Helper 17 Cells
Source: PubMed Central journal article supplement (PMC6396413; doi:10.1101/gr.238253.118), 2019-03
Supplement: supp_gr.238253.118_Supplemental_Fig_S27.pdf [file supp_gr.238253.118_Supplemental_Fig_S27.pdf]

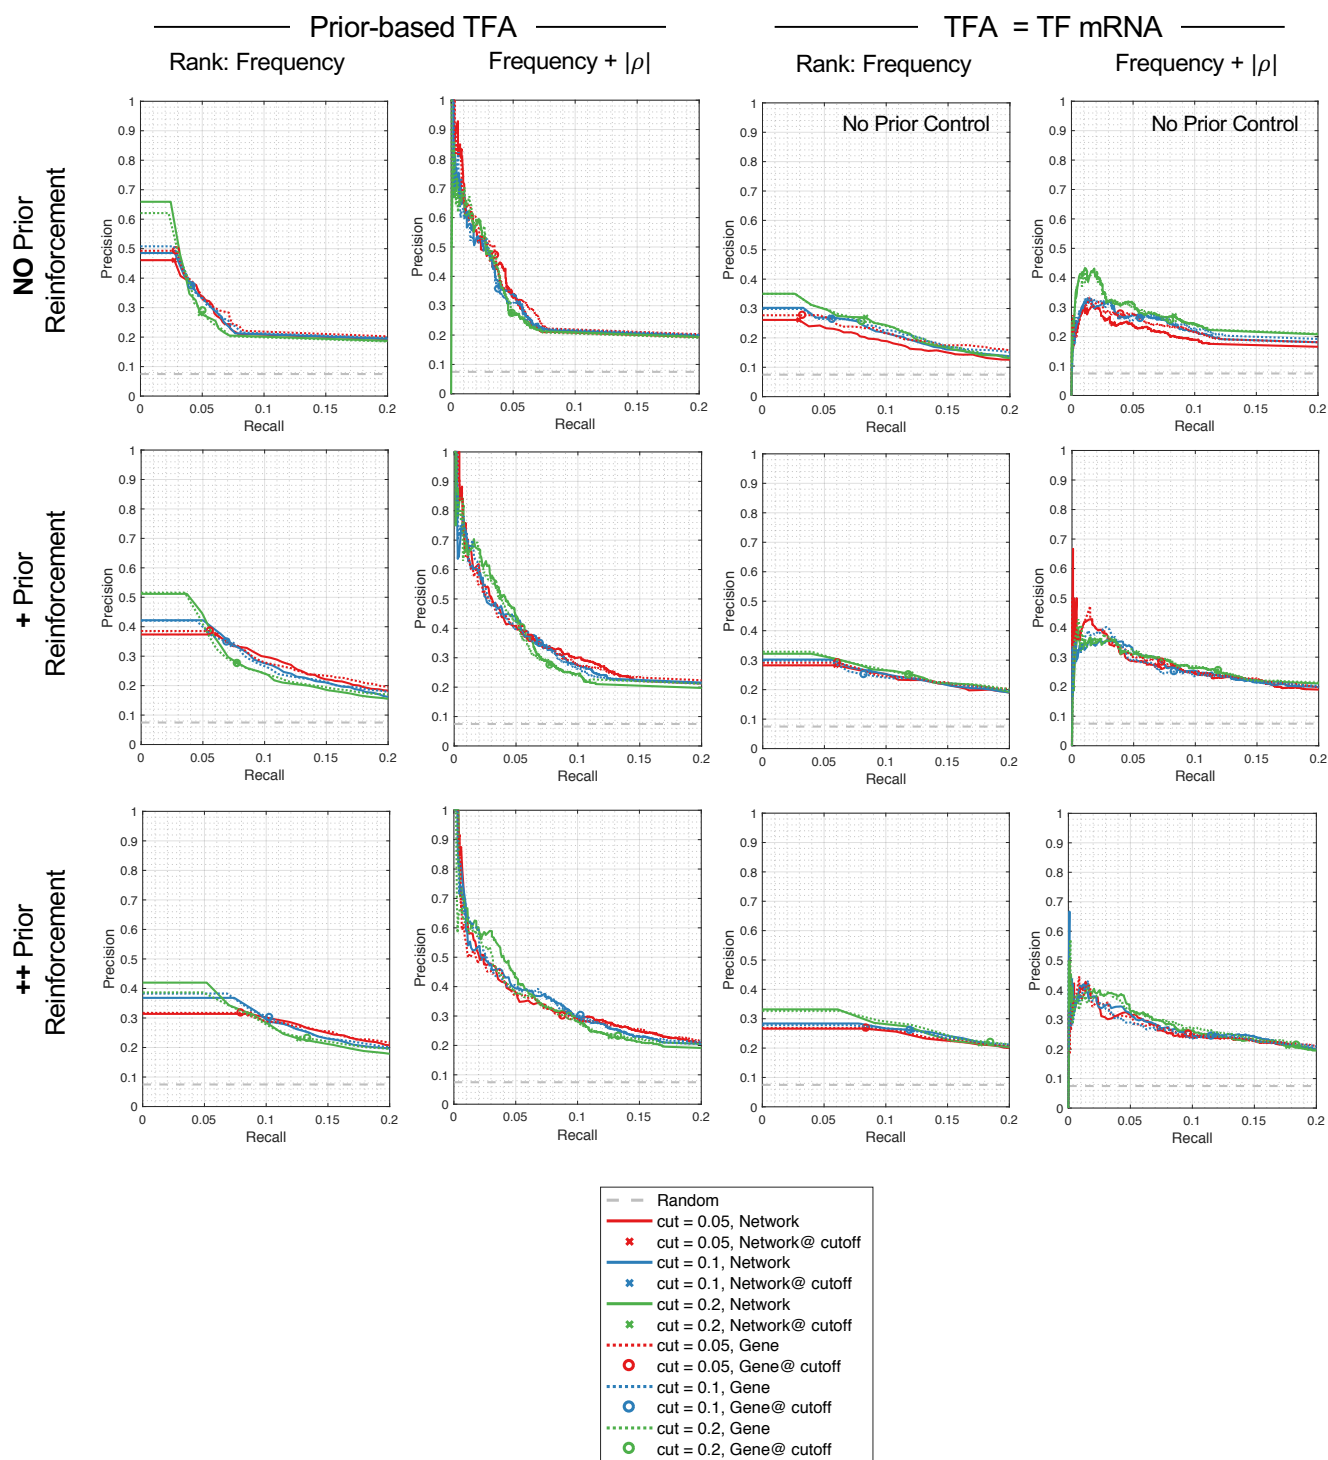

**Figure S27. StARS parameterization: precision-recall of the KO+ChIP G.S. TRNs** were built using the Th17 ATAC prior with prior-based or TF mRNA TFA, no, moderate or strong prior reinforcement, network- and gene-level average instabilities at cutoffs .05, .1 and .2. Edges are ranked according to nonzero subsamples or **Equation 4**.
