# Supplementary material for: Leveraging chromatin accessibility for transcriptional regulatory network inference in T Helper 17 Cells
Source: PubMed Central journal article supplement (PMC6396413; doi:10.1101/gr.238253.118), 2019-03
Supplement: supp_gr.238253.118_Supplemental_Fig_S31.pdf [file supp_gr.238253.118_Supplemental_Fig_S31.pdf]

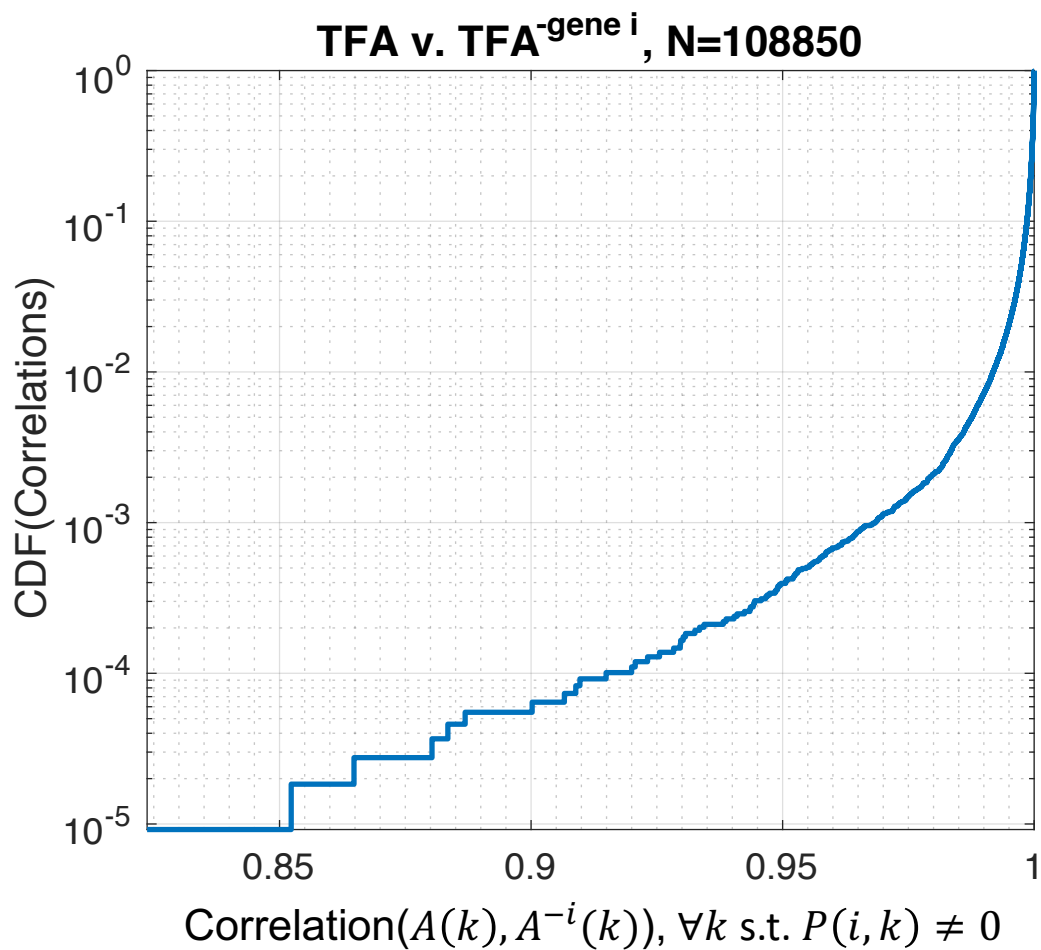

**Figure S31. Effect of individual target genes on prior-based TFA estimation.** The empirical cumulative distribution function (CDF) of Pearson correlation coefficients between TFA estimates from **Equation 2** versus **Equation 6**, using the Th17 ATAC prior. For each of the 2093 target genes with edges in the prior  $P$ , **Equation 6** is solved for  $A^{-i}$ . For each gene  $i$ , correlations are limited to those TFs  $k$  for which  $P(i, k) \neq 0$ , yielding 108,850 correlation coefficients.
