# Supplementary material for: Leveraging chromatin accessibility for transcriptional regulatory network inference in T Helper 17 Cells
Source: PubMed Central journal article supplement (PMC6396413; doi:10.1101/gr.238253.118), 2019-03
Supplement: supp_gr.238253.118_Supplemental_Fig_S32.pdf [file supp_gr.238253.118_Supplemental_Fig_S32.pdf]

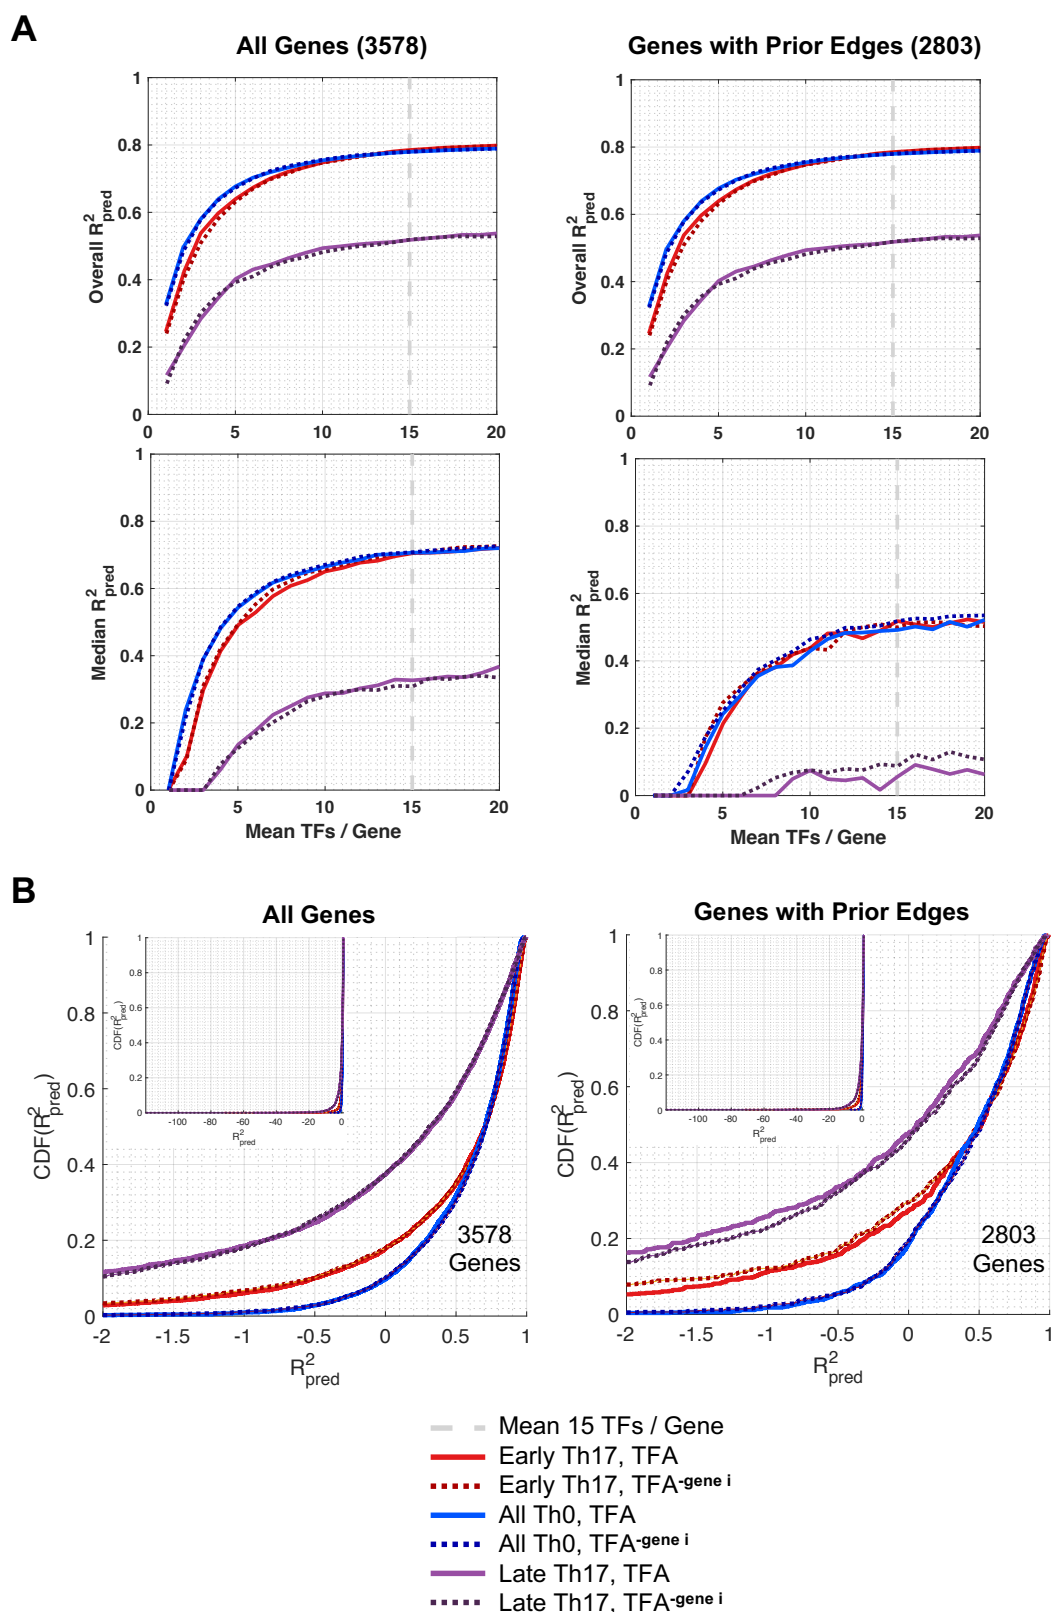

**Figure S32. Effect of individual target genes on prediction using prior-based TFA.** For the three out-of-sample prediction challenges, gene models were built using **Equation 2** (“TFA”) or **Equation 6** (“TFA-gene *i*”), using mLASSO-StARS, Th17 ATAC prior, and moderate prior reinforcement. **(A)** Overall  $R^2_{\text{pred}}$  and median per-gene  $R^2_{\text{pred}}$  for all genes or limited to those genes with edges in the prior. **(B)** The CDFs of per-gene  $R^2_{\text{pred}}$  are plotted for average model size of 15 TFs/gene. Thus, in this context, evaluation of out-of-sample gene expression prediction can be accomplished using **Equation 2** (versus the more computationally intensive **Equation 6**).
