# Supplementary material for: Leveraging chromatin accessibility for transcriptional regulatory network inference in T Helper 17 Cells
Source: PubMed Central journal article supplement (PMC6396413; doi:10.1101/gr.238253.118), 2019-03
Supplement: supp_gr.238253.118_Supplemental_Fig_S33.pdf [file supp_gr.238253.118_Supplemental_Fig_S33.pdf]

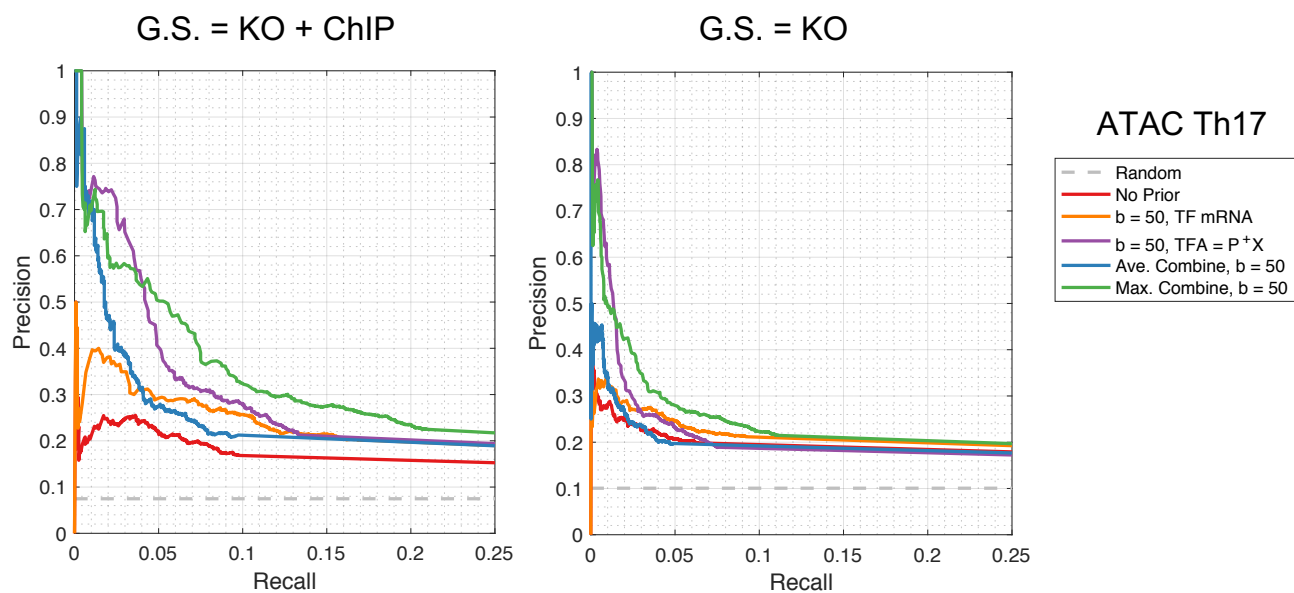

**Figure S33. Rank-combination of ATAC TRNs.** The precision-recall of individual ATAC TRNs (at moderate prior reinforcement “b=50” for prior-based and TF mRNA TFA) are compared to performance average- or maximum-combination of TRNs.
