# Supplementary material for: Leveraging chromatin accessibility for transcriptional regulatory network inference in T Helper 17 Cells
Source: PubMed Central journal article supplement (PMC6396413; doi:10.1101/gr.238253.118), 2019-03
Supplement: supp_gr.238253.118_Supplemental_Fig_S34.pdf [file supp_gr.238253.118_Supplemental_Fig_S34.pdf]

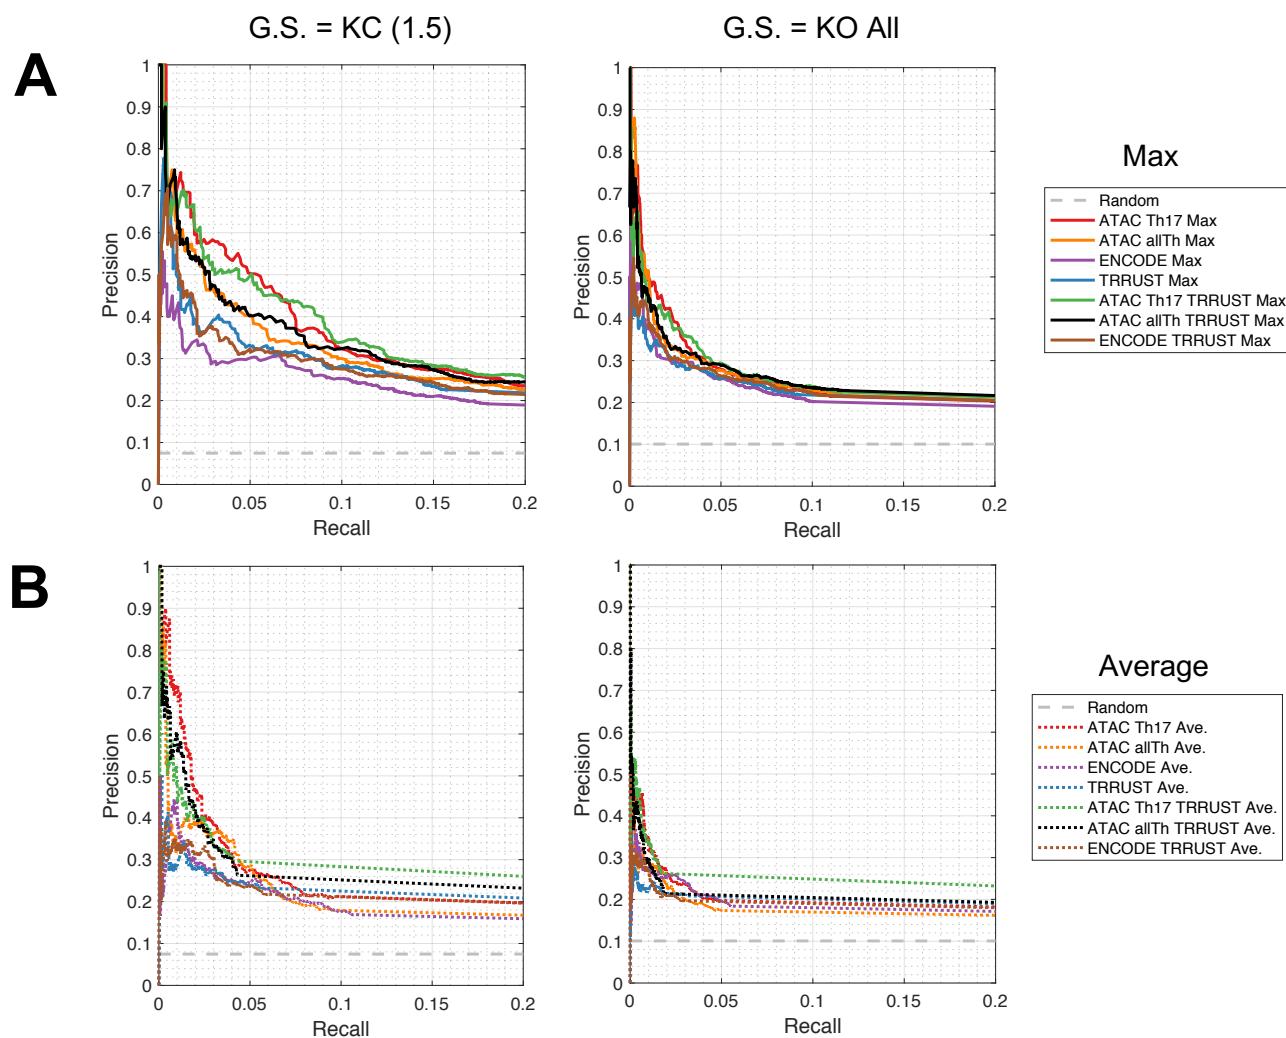

**Figure S34. Rank-combination of TRNs from different priors.** The precision-recall of TRNs from individual priors and pairs of priors (at moderate prior reinforcement “ $b=50$ ” for both prior-based and TF mRNA TFA) are compared, using **(A)** maximum- or **(B)** average-combination of TRNs.
