# Supplementary material for: Leveraging chromatin accessibility for transcriptional regulatory network inference in T Helper 17 Cells
Source: PubMed Central journal article supplement (PMC6396413; doi:10.1101/gr.238253.118), 2019-03
Supplement: supp_gr.238253.118_Supplemental_Fig_S35.pdf [file supp_gr.238253.118_Supplemental_Fig_S35.pdf]

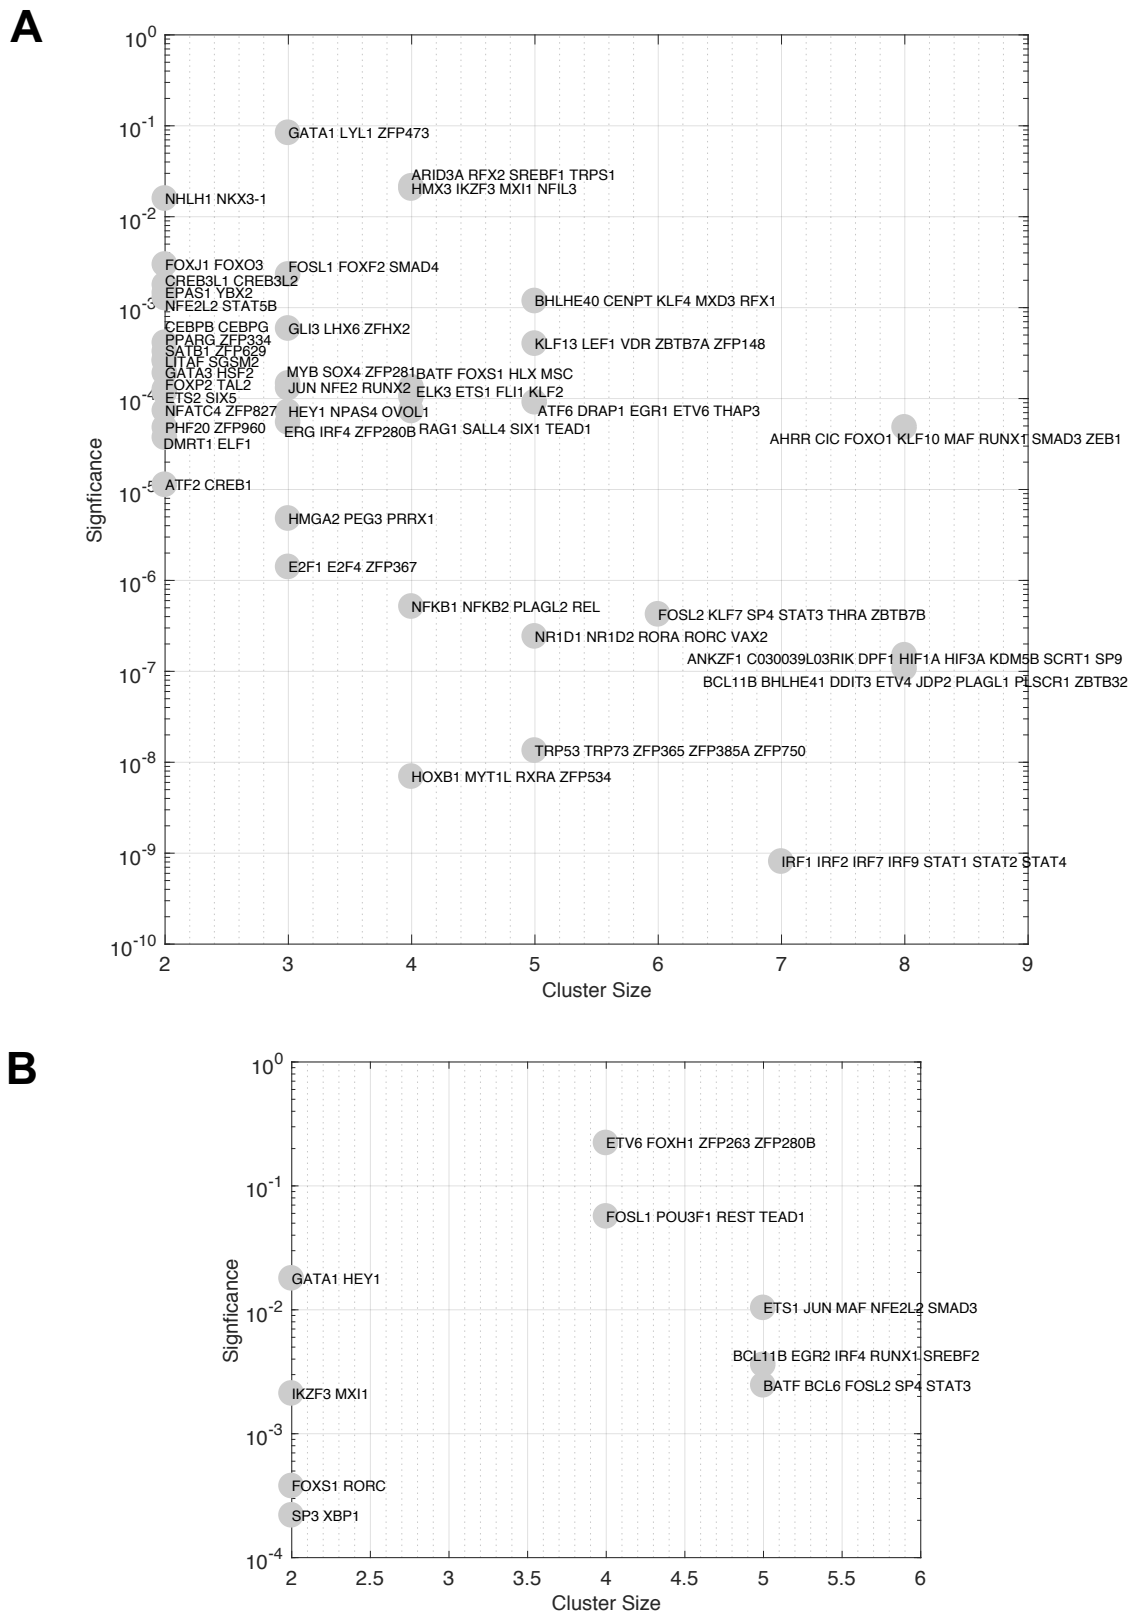

**Figure S35. Ranking of TF-TF Clusters.** Heuristic significance estimates versus cluster size for TF-TF modules built from (A) positive and (B) negative TF-TF edge overlaps. Results are shown for the “final” ChIP+KO+ATAC TRN.
