# Supplementary material for: Leveraging chromatin accessibility for transcriptional regulatory network inference in T Helper 17 Cells
Source: PubMed Central journal article supplement (PMC6396413; doi:10.1101/gr.238253.118), 2019-03
Supplement: supp_gr.238253.118_Supplemental_Table_S1.pdf [file supp_gr.238253.118_Supplemental_Table_S1.pdf]

Table S1

A

| Prior                      | Full Prior (All Genes + TFs) |       |         | Prior Limited to Model TFs & Genes |       |         | Overlap ChIP G.S. |         | Overlap KO G.S. |         | Overlap KO+ChIP G.S. |         |
|----------------------------|------------------------------|-------|---------|------------------------------------|-------|---------|-------------------|---------|-----------------|---------|----------------------|---------|
|                            | # Edges                      | # TFs | # Genes | # Edges                            | # TFs | # Genes | #TFs              | % Edges | #TFs            | % Edges | #TFs                 | % Edges |
| ATAC (Th17)                | 1,120,541                    | 842   | 17,141  | 112,866                            | 357   | 2,804   | 9                 | 43%     | 23              | 20%     | 9                    | 42%     |
| ATAC (aTh)                 | 1,906,421                    | 831   | 20,721  | 191,508                            | 351   | 3,201   | 9                 | 54%     | 23              | 28%     | 9                    | 51%     |
| TRRUST                     | 7,176                        | 582   | 2,174   | 1,529                              | 215   | 512     | 8                 | 1%      | 20              | 0%      | 8                    | 1%      |
| ENCODE DHS                 | 1,552,681                    | 546   | 17,471  | 197,156                            | 245   | 3,362   | 7                 | 29%     | 17              | 24%     | 7                    | 33%     |
| ChIP                       | 70,652                       | 9     | 14,945  | 13,925                             | 9     | 2,869   | 9                 | 87%     | 9               | 34%     | 9                    | 89%     |
| ChIP/A(Th17)               | 1,163,624                    | 842   | 19,549  | 121,350                            | 357   | 3,217   | 9                 | 87%     | 23              | 40%     | 9                    | 89%     |
| ChIP/A(Th17) + KO          | 1,178,955                    | 844   | 19,686  | 126,661                            | 359   | 3,258   | 9                 | 90%     | 25              | 100%    | 9                    | 100%    |
| ChIP/A(Th17) + KO + A(aTh) | 2,070,038                    | 844   | 21,890  | 212,534                            | 359   | 3,353   | 9                 | 94%     | 25              | 100%    | 9                    | 100%    |
| ChIP                       | 22,334                       | 9     | 7,107   | 6,174                              | 9     | 1,696   | 9                 | 100%    | 9               | 20%     | 9                    | 75%     |
| KO                         | 22,693                       | 26    | 7,088   | 8,875                              | 25    | 1,766   | 9                 | 29%     | 25              | 100%    | 9                    | 100%    |
| KO + ChIP                  | 4,249                        | 9     | 2,223   | 2,375                              | 9     | 996     | 9                 | 29%     | 9               | 27%     | 9                    | 100%    |

B

| Prior                      | Full Prior (All Genes + TFs) |       |         | Prior Limited to Model TFs & Genes |       |         | Overlap ChIP G.S. |         | Overlap KO G.S. |         | Overlap KO+ChIP G.S. |         |
|----------------------------|------------------------------|-------|---------|------------------------------------|-------|---------|-------------------|---------|-----------------|---------|----------------------|---------|
|                            | # Edges                      | # TFs | # Genes | # Edges                            | # TFs | # Genes | #TFs              | % Edges | #TFs            | % Edges | #TFs                 | % Edges |
| ATAC (Th17)                | 1,083,589                    | 811   | 17,138  | 109,513                            | 346   | 2,803   | 9                 | 43%     | 23              | 21%     | 9                    | 42%     |
| ATAC (aTh)                 | 1,843,825                    | 801   | 20,720  | 185,837                            | 340   | 3,201   | 9                 | 54%     | 23              | 30%     | 9                    | 51%     |
| TRRUST                     | 6,686                        | 488   | 2,123   | 1,448                              | 187   | 502     | 8                 | 1%      | 19              | 1%      | 8                    | 1%      |
| ENCODE DHS                 | 1,525,958                    | 536   | 17,472  | 193,365                            | 238   | 3,362   | 7                 | 29%     | 17              | 26%     | 7                    | 33%     |
| ChIP                       | 70,652                       | 9     | 14,945  | 13,925                             | 9     | 2,869   | 9                 | 87%     | 9               | 37%     | 9                    | 89%     |
| ChIP/A(Th17)               | 1,126,672                    | 811   | 19,548  | 117,997                            | 346   | 3,217   | 9                 | 87%     | 23              | 43%     | 9                    | 89%     |
| ChIP/A(Th17) + KO          | 1,140,685                    | 811   | 19,685  | 122,760                            | 346   | 3,258   | 9                 | 90%     | 23              | 100%    | 9                    | 100%    |
| ChIP/A(Th17) + KO + A(aTh) | 2,004,885                    | 811   | 21,890  | 206,103                            | 346   | 3,353   | 9                 | 94%     | 23              | 100%    | 9                    | 100%    |
| ChIP                       | 22,334                       | 9     | 7,107   | 6,174                              | 9     | 1,696   | 9                 | 100%    | 9               | 22%     | 9                    | 75%     |
| KO                         | 21,375                       | 24    | 7,015   | 8,327                              | 23    | 1,759   | 9                 | 29%     | 23              | 100%    | 9                    | 100%    |
| KO + ChIP                  | 4,249                        | 9     | 2,223   | 2,375                              | 9     | 996     | 9                 | 29%     | 9               | 29%     | 9                    | 100%    |

**Table S1. Statistics on Priors and Gold Standards. (A) and (B) were generated using the initial and updated mouse TF lists, respectively (see [Methods](#)).**
