# Supplementary material for: Leveraging chromatin accessibility for transcriptional regulatory network inference in T Helper 17 Cells
Source: Genome Res. 2019 Mar;29(3):449–63. doi: 10.1101/gr.238253.118 (PMC6396413; doi:10.1101/gr.238253.118)
Supplement: Supplemental Material [file supp_gr.238253.118_Supplemental_Table_S2.xlsx]

## Sheet: th17_RNAseq254_DESeq2_VSDcounts
Table S2. Normalized gene expression matrix. Data were normalized as described in Methods, and final units are DESeq2 VSD counts.
	48hr_Th17_SAA_1	48hr_Th17_SAA_2	48hr_Th17_veh_1	48hr_Th17_veh_2	CD4_T_cell_Batf_ko_48h_SL35226	CD4_T_cell_Batf_ko_48h_SL35228	CD4_T_cell_Batf_ko_48h_SL35230	CD4_T_cell_Batf_ko_48h_SL35232	CD4_T_cell_Batf_ko_48h_SL35234	CD4_T_cell_Batf_ko_48h_SL35236	CD4_T_cell_Batf_wt_48h_SL35225	CD4_T_cell_Batf_wt_48h_SL35227	CD4_T_cell_Batf_wt_48h_SL35229	CD4_T_cell_Batf_wt_48h_SL35231	CD4_T_cell_Batf_wt_48h_SL35233	CD4_T_cell_Batf_wt_48h_SL35235	CD4_T_cell_IRF4ko_48h_SL35238	CD4_T_cell_IRF4ko_48h_SL35240	CD4_T_cell_IRF4ko_48h_SL35242	CD4_T_cell_IRF4ko_48h_SL35244	CD4_T_cell_IRF4ko_48h_SL35246	CD4_T_cell_IRF4ko_48h_SL35248	CD4_T_cell_IRF4wt_48h_SL35237	CD4_T_cell_IRF4wt_48h_SL35239	CD4_T_cell_IRF4wt_48h_SL35241	CD4_T_cell_IRF4wt_48h_SL35243	CD4_T_cell_IRF4wt_48h_SL35245	CD4_T_cell_IRF4wt_48h_SL35247	iTreg_IMDM_wt_48h_SL2685	iTreg_IMDM_wt_48h_SL3305	media_only_nCD4_T_cell_wt_1h_SL2653	Th0_B-ATF_ko_mm_10_48h_SL3302	Th0_B-ATF_ko_mm_11_48h_SL4223	Th0_B-ATF_wt_pp_10_48h_SL3300	Th0_B-ATF_wt_pp_11_48h_SL4221	Th0_c-Maf_ko_flox_s_CD4-Cre_12_48h_SL2764	Th0_c-Maf_ko_flox_s_CD4-Cre_13_48h_SL4219	Th0_c-Maf_wt_pCD4-Cre_12_48h_SL2762	Th0_c-Maf_wt_pCD4-Cre_13_48h_SL4217	Th0_Fosl2_flfl_CD4-Cre_48h_SL11895	Th0_Fosl2_flfl_CD4-Cre_48h_SL12529	Th0_Fosl2_pp_CD4-Cre_48h_SL11893	Th0_Fosl2_pp_CD4-Cre_48h_SL12527	Th0_Hif1a_flfl_CD4-cre_48h_SL11891	Th0_Hif1a_flfl_CD4-cre_48h_SL12365	Th0_Hif1a_pp_CD4-cre_48h_SL12363	Th0_Ikzf3_mm_18_48h_SL6495	Th0_Ikzf3_pp_18_48h_SL6493	Th0_IRF4_ko_flox_s_CD4-Cre_4_48h_SL1862
0610005C13Rik	4.25257	4.30674	3.69955	4.58802	3.99191	4.01804	3.83058	4.14142	3.64778	3.46455	3.0418	4.17503	4.24037	3.9521	4.30742	4.09661	4.12	4.09346	4.2768	3.96214	4.24981	4.11432	3.73895	4.35807	4.44018	4.27193	4.03907	3.86273	3.76793	3.89182	3.63087	4.30057	4.55506	4.5463	4.31189	4.44138	4.3184	3.74667	4.13069	4.38246	4.27351	4.55349	4.48417	4.72811	4.16646	4.05393	3.64758	4.33287	4.1898
0610007P14Rik	11.3754	11.3245	11.2469	11.1182	9.73581	9.87924	9.69436	9.7236	9.43388	9.27762	9.78803	9.60858	9.48861	9.79884	9.26472	9.34999	9.52008	9.41866	9.49391	9.42666	8.77079	8.56534	9.61468	9.74978	9.62644	9.64348	9.05182	9.39494	10.4968	10.5388	7.68279	10.9014	10.8495	10.6218	10.599	10.2505	10.3545	10.405	10.0972	10.5582	10.4435	10.6487	10.5917	11.0336	10.9688	10.5774	10.4572	10.5464	10.8702
0610009B22Rik	7.9782	7.93571	7.96333	7.93665	6.39968	6.54073	6.47401	6.68074	6.46461	6.26369	6.86925	6.58468	6.30812	6.70889	6.18895	6.36919	6.34839	6.49499	6.2506	6.27235	6.05725	5.8826	6.60199	6.38281	6.37632	6.31913	6.11818	6.46418	7.45844	6.99719	5.20582	7.60785	7.48233	7.68581	7.42179	7.85141	7.06122	7.25154	7.4487	7.75291	7.51602	7.57252	7.7101	7.63454	7.47636	7.48339	7.45903	7.49137	8.15043
0610009L18Rik	4.92498	4.64403	5.07084	4.69192	3.92362	4.07491	3.97064	3.88141	3.89271	3.9278	3.71101	4.02925	3.95861	4.1825	4.12076	4.32038	3.7697	4.09346	4.13797	3.75942	4.24981	4.43834	3.53713	4.14808	3.84411	4.00575	4.33499	4.00813	3.92661	4.54704	4.95361	3.74631	3.89661	4.4711	4.40689	4.65555	4.42209	4.49035	4.06324	4.65769	4.21923	5.00822	4.48417	4.35818	4.67285	3.98149	4.53066	4.07468	4.31747
0610009O20Rik	8.90627	8.96541	9.09222	9.01891	9.51994	9.60767	9.42874	9.58766	9.42926	9.60439	9.21775	9.45489	9.66629	9.34449	9.5484	9.36139	9.69334	9.79533	9.64664	9.69755	10.1394	10.1064	9.27669	9.70848	9.66597	9.55111	9.71884	9.68007	9.42523	9.39555	8.68535	9.16632	9.58959	9.06781	9.19134	9.57649	9.42912	9.65543	9.42437	9.41128	9.4603	9.44397	9.61449	9.50328	9.60972	9.41037	9.59978	9.63498	9.68928
0610010B08Rik	3.0418	3.0418	3.0418	3.0418	3.0418	3.0418	3.0418	3.0418	3.0418	3.0418	3.0418	3.0418	3.0418	3.0418	3.0418	3.0418	3.0418	3.0418	3.0418	3.0418	3.0418	3.0418	3.0418	3.0418	3.0418	3.0418	3.0418	3.0418	3.0418	3.0418	3.0418	3.0418	3.0418	3.0418	3.0418	3.0418	3.0418	3.0418	3.0418	3.0418	3.0418	3.0418	3.0418	3.0418	3.0418	3.0418	3.0418	3.0418	3.0418
0610010F05Rik	9.87336	9.88224	10.0133	9.95715	9.83607	9.86719	9.77471	9.8512	9.68195	9.6396	10.0657	9.88913	9.78775	9.93294	9.60671	9.69355	10.115	9.9891	9.92564	9.8397	9.28619	9.2897	9.97096	9.73455	9.84389	9.83446	9.729	9.72185	9.99574	9.42673	7.15663	9.61518	9.74616	9.57075	9.94073	9.76384	9.98318	9.81651	9.97028	9.37647	9.35695	9.45011	9.79511	9.92064	9.68341	9.63167	9.45433	9.36312	9.44952
0610010K14Rik	8.17152	8.11431	8.68223	8.57707	8.87701	9.04571	8.93447	8.99572	9.1341	9.17113	8.9067	8.88334	9.1308	9.15506	9.22571	9.19363	9.1906	9.28979	9.20956	9.23743	9.33974	9.19218	8.90697	8.77395	9.10591	9.04154	9.07392	9.19972	9.08091	9.56394	8.50353	9.27296	9.46143	9.09528	8.90761	9.15296	8.78054	9.15937	8.8403	9.74085	9.59401	9.52763	9.39625	9.4062	9.45	9.36225	9.28233	9.4905	10.0261
0610011F06Rik	9.44892	9.44516	9.142	9.00774	7.87428	7.87074	8.0881	8.07354	8.06394	8.13524	8.14573	8.03949	8.05751	7.95022	8.05604	8.07317	7.96961	8.13853	7.96105	7.83495	8.09626	7.86896	8.16393	8.2171	8.16994	8.15266	7.99103	8.43606	8.43234	9.2567	7.31683	8.98615	8.88493	8.95238	8.68308	8.8273	8.35916	8.79908	8.34103	9.30857	9.12346	9.21074	9.24091	8.77872	9.06984	8.98331	8.88821	9.21699	9.26529
0610012G03Rik	8.69234	8.73345	9.07369	8.96218	7.52181	7.68385	7.80485	7.86277	7.88634	8.1498	7.6448	7.75659	7.91043	7.63756	8.18133	7.97424	7.71743	7.81315	8.04136	7.91597	7.94053	7.91484	7.5215	7.74444	7.92178	7.907	7.9783	8.10368	8.53125	8.98789	7.80475	8.3491	8.16546	8.57897	8.2815	8.45061	8.7557	8.45182	8.39212	8.80696	8.79851	8.66309	8.64652	8.39366	8.27528	8.56987	8.41431	8.7552	8.63747
0610030E20Rik	9.18307	9.1783	9.32945	9.44708	10.2169	10.1977	10.3526	10.4265	10.2292	10.2302	10.1956	10.1765	10.5249	10.4936	10.1947	10.1752	10.1038	10.0415	10.1557	10.2584	10.3527	10.3343	10.2541	10.1754	10.474	10.4348	10.1493	9.97333	10.3302	9.90236	11.4559	10.144	10.4114	10.2483	10.3857	10.064	10.0839	10.0636	10.5074	10.192	10.0785	10.1649	10.1903	10.1736	10.2752	10.2074	10.1649	10.0454	10.1314
0610031J06Rik	8.23919	8.27669	8.25846	8.41398	8.61415	8.60686	8.49994	8.50259	9.05131	9.08576	8.50954	8.67883	8.65843	8.51577	9.06861	9.10295	8.61304	8.71331	8.76099	8.66514	9.36291	9.16049	8.55486	8.9704	8.52158	8.52827	8.95882	9.10671	9.12012	9.495	8.92327	9.22385	9.28448	9.27897	9.16877	9.26795	8.84477	9.09996	8.55434	9.3064	9.34542	9.32873	9.64332	8.8978	9.32533	9.43698	9.42988	9.54086	9.31127
0610031O16Rik	3.66036	3.0418	3.0418	3.48967	3.84881	3.53686	3.39806	3.0418	3.56755	3.63755	3.71101	3.61924	3.50595	3.0418	3.64229	3.57794	3.55921	3.0418	3.0418	3.0418	3.0418	3.0418	3.0418	3.41859	3.0418	3.44142	3.34794	3.41288	3.92661	3.73911	3.0418	4.1045	4.02426	4.34755	4.65032	3.79319	3.0418	3.54267	3.0418	3.72997	3.42345	3.7423	3.62738	3.76258	3.42512	3.81346	3.0418	3.51157	3.62704
0610037L13Rik	8.60956	8.77109	8.97475	8.9007	7.65294	7.86468	7.8275	7.75658	7.93283	7.89931	7.43479	7.82916	7.87913	7.89372	7.98081	7.82467	7.90011	7.98687	7.68913	7.96889	7.91198	7.84172	7.76239	7.84725	8.03547	7.76642	7.87674	8.18611	8.6238	8.72234	8.66074	8.57061	8.15545	8.62305	8.2815	8.70358	8.55431	8.72578	8.50878	8.57732	8.55111	8.40094	8.65146	8.6261	8.43015	8.42287	8.75919	8.60657	9.25072
0610038B21Rik	3.91013	3.78741	3.844	3.81149	3.76545	3.0418	3.74903	3.77143	4.11722	3.76892	3.71101	3.37666	3.95861	4.11213	3.81341	4.21496	3.99741	3.73882	3.63768	3.75942	3.966	3.86859	4.01857	3.78914	3.9185	3.72963	4.03907	3.97417	3.55793	4.12918	4.19703	4.1045	4.02426	3.66229	4.2071	4.00486	3.43815	3.74667	3.99018	4.1153	4.10049	4.23294	3.0418	4.26617	3.96754	3.0418	3.64758	3.84851	4.11901
0610039K10Rik	4.00912	3.78741	4.32591	4.20014	3.84881	4.27249	4.09008	3.77143	4.22891	3.76892	3.71101	3.78404	4.15577	3.7515	4.21858	3.92228	3.67382	3.73882	4.05998	3.86768	4.16461	4.46879	3.0418	3.87509	3.98642	3.44142	4.08162	4.1881	3.55793	4.31715	4.43946	3.61891	3.0418	3.54972	3.0418	4.24734	3.43815	3.54267	3.82067	4.00621	4.10049	4.02319	3.45728	4.26617	4.22417	4.86935	4.22854	4.25419	3.62704
0610040B10Rik	4.50506	4.98022	4.85449	4.87583	3.92362	3.64666	4.14424	3.97733	3.94275	3.97417	3.98009	3.78404	4.11044	3.85862	4.21858	3.88245	4.22803	4.16272	3.97436	3.62972	3.8455	4.02447	3.89162	4.14808	4.04918	4.07992	3.84295	3.93875	5.20981	4.61412	4.32541	4.81132	5.1453	5.15839	4.96895	4.91742	4.72311	5.23776	4.63239	4.71722	5.01537	5.14328	4.90832	4.95779	4.74448	4.65788	4.53066	4.91031	4.97682
0610040F04Rik	4.09768	3.89967	4.16255	4.02797	3.67012	3.0418	3.0418	3.46602	3.56755	3.82584	3.71101	3.9163	3.0418	3.9521	3.64229	3.74806	3.67382	3.0418	3.76908	3.0418	3.37344	3.58724	3.89162	4.20494	3.66641	3.92439	3.0418	3.90168	4.7396	4.2277	3.0418	4.6071	5.22813	5.47031	5.47361	5.13345	3.91734	4.75445	4.13069	4.87987	4.73774	4.85699	5.07532	4.16478	4.42651	4.18314	4.63138	4.95518	3.86398
0610040J01Rik	3.0418	3.0418	3.5089	3.0418	3.67012	3.39271	3.54436	3.0418	3.47186	3.46455	3.0418	3.0418	3.50595	3.45428	3.0418	3.74806	3.0418	3.32866	3.63768	3.0418	3.50979	3.48803	3.0418	3.41859	3.40429	3.0418	3.57008	3.30456	3.0418	3.0418	3.63087	3.0418	3.5401	3.40188	3.79057	3.0418	3.60058	3.0418	3.0418	3.0418	3.0418	3.0418	3.45728	3.0418	3.0418	3.0418	3.0418	3.0418	3.0418
0610043K17Rik	3.48085	3.0418	3.5089	3.0418	3.0418	3.0418	3.0418	3.0418	3.0418	3.0418	3.0418	3.0418	3.0418	3.0418	3.0418	3.0418	3.0418	3.0418	3.0418	3.0418	3.0418	3.0418	3.0418	3.0418	3.0418	3.0418	3.0418	3.0418	3.0418	3.0418	3.86928	3.61891	4.23421	3.75649	3.79057	3.0418	3.0418	3.0418	3.43477	3.0418	3.0418	3.0418	3.86444	3.55409	3.0418	3.0418	3.47172	3.0418	3.45704
1010001N08Rik	3.0418	3.0418	3.0418	3.0418	3.0418	3.0418	3.0418	3.0418	3.0418	3.34126	3.0418	3.0418	3.0418	3.0418	3.0418	3.0418	3.0418	3.0418	3.0418	3.0418	3.37344	3.0418	3.0418	3.0418	3.0418	3.0418	3.0418	3.0418	3.0418	3.0418	3.0418	3.0418	3.0418	3.0418	3.0418	3.0418	3.0418	3.0418	3.0418	3.0418	3.42345	3.0418	3.45728	3.0418	3.0418	3.0418	3.0418	3.0418	3.0418
1100001G20Rik	3.48085	3.0418	3.0418	3.67269	3.0418	3.0418	3.0418	3.0418	3.0418	3.0418	3.0418	3.0418	3.0418	3.0418	3.0418	3.0418	3.0418	3.0418	3.0418	3.0418	3.0418	3.0418	3.0418	3.0418	3.0418	3.0418	3.0418	3.0418	3.0418	3.0418	3.0418	3.0418	3.0418	3.0418	3.57419	3.0418	3.0418	3.0418	3.0418	3.0418	3.0418	3.0418	3.0418	3.0418	3.42512	3.0418	3.0418	3.0418	3.45704
1110001J03Rik	7.66467	7.83497	8.10252	7.95539	5.83463	5.89225	5.98526	5.93696	5.96733	6.18009	6.15871	6.06945	6.13132	6.30973	6.09916	5.98716	5.79166	6.31548	6.0917	5.89981	5.9368	5.64551	6.15784	6.13551	6.10419	6.39817	5.91609	6.1006	7.13574	7.89389	6.7698	7.71277	7.13965	7.97941	7.35322	7.61368	6.80164	7.26103	7.11188	8.00991	7.82021	7.99877	7.7705	7.80015	7.58602	7.72916	7.54138	8.02357	8.03415
1110002L01Rik	6.54493	6.67267	6.73331	6.87648	6.44459	6.55594	6.42354	6.08376	6.31752	6.09883	6.19516	6.36625	6.36245	6.23291	6.37855	6.21393	6.39547	6.51591	6.70276	6.40945	6.39725	6.49134	6.13762	6.05072	6.28154	6.2719	6.11818	5.95283	6.79011	6.27398	5.68215	6.31688	6.4779	6.23624	6.44543	6.21333	6.80164	6.0123	6.26807	6.44794	6.36294	6.33935	6.2498	6.71449	6.41389	6.62082	6.00077	6.32061	6.24846
1110004E09Rik	9.68008	9.81058	9.81978	9.75959	8.81565	8.7776	8.85333	8.89931	8.54338	8.61853	8.99608	8.75375	8.8332	9.06297	8.5368	8.58554	8.9066	8.85342	8.58204	8.6602	8.35327	8.33092	8.97602	8.3948	8.72601	8.9312	8.52946	8.62517	8.93464	8.82578	6.82428	8.93785	8.74842	8.79207	8.88355	8.93676	9.2301	9.22369	8.83448	9.13075	9.0031	8.87876	9.00246	9.22324	9.05881	8.79234	9.09675	9.13572	9.57048
1110004F10Rik	10.0501	10.1484	10.2339	10.1544	9.41652	9.456	9.46422	9.48742	9.39096	9.41793	9.68113	9.39884	9.38851	9.46563	9.44033	9.38889	9.48278	9.49511	9.43274	9.56648	9.15405	9.03722	9.62367	9.34475	9.48943	9.45764	9.27196	9.47042	10.0002	10.1303	9.39246	9.8629	9.74949	9.84845	9.77877	9.90691	9.98407	10.1271	9.96585	9.84488	9.81715	9.66769	9.66548	9.93926	9.92301	9.87537	9.85179	9.96503	10.6609
1110006O24Rik	3.91013	3.65281	3.5089	3.92718	4.48802	4.47464	4.81751	4.56332	4.6791	4.74172	4.18146	4.41343	4.93494	4.52433	4.63441	4.36925	4.6438	4.52319	4.82405	5.11342	4.75907	4.63577	4.47538	4.49148	4.75632	4.80948	4.56392	4.67805	4.36751	4.61412	4.72433	4.7338	3.89661	4.74602	3.95391	4.24734	4.60371	4.41337	4.25248	4.59494	4.73774	5.05484	4.75638	4.90427	5.07723	4.83658	4.36001	4.95518	4.87113
1110007C09Rik	8.15604	8.28365	7.49728	7.61567	6.40878	6.76652	6.10829	6.31192	6.92719	6.90548	6.45706	6.96709	6.42937	6.51793	7.41743	7.3049	6.73199	6.83542	6.33027	6.29829	7.67919	7.43396	6.47954	7.26025	6.58873	6.60237	7.34938	7.4095	7.44082	8.21311	8.14731	8.17325	7.99059	8.4337	7.67542	7.6024	7.97008	7.51993	7.15623	7.29779	7.12961	7.80777	7.97385	7.7089	7.65054	7.47361	7.63542	8.10437	7.47181
1110008F13Rik	9.96941	9.95379	9.95377	9.96295	9.07115	8.98006	9.1408	8.95459	9.05431	9.16577	8.99608	9.08153	9.19888	9.10443	9.16515	9.06548	9.04319	9.20048	9.11074	9.17822	8.93573	9.0653	8.83444	8.90217	9.02859	9.20127	9.03861	9.22107	8.75058	9.18313	8.02916	9.09939	8.57151	9.04404	8.91441	8.82246	8.79077	9.00178	8.86905	9.39501	9.35439	9.31534	9.03499	9.38371	9.13583	8.90195	9.29423	9.4365	9.67844
1110008L16Rik	8.94505	9.11142	9.19656	9.15474	8.77266	8.83907	8.79221	8.82822	8.40897	8.32354	8.92824	8.71907	8.58439	8.78999	8.27875	8.36655	8.77524	8.77165	8.69056	8.61242	7.95078	8.10596	8.90106	8.69352	8.65855	8.66116	8.3117	8.39319	8.59228	8.50966	7.27842	8.68039	8.90598	8.72154	8.80887	9.11977	9.13056	9.21642	9.21939	8.87604	8.96343	8.89084	8.77895	8.81616	8.72563	8.81185	9.26861	9.08746	9.11251
1110008P14Rik	7.94705	7.95765	7.85884	8.10136	6.47086	6.74018	6.93563	6.78825	6.86438	7.00525	6.77684	7.24743	7.21353	7.17771	7.36336	7.00449	6.85112	7.01453	7.0454	7.3367	7.24335	7.08201	6.85647	6.89823	6.99755	7.07551	6.9699	7.17735	6.59592	7.52983	6.96014	7.2502	7.2756	7.44615	7.30216	8.06773	8.00567	7.74599	7.43335	8.05208	8.20767	7.97624	7.98566	7.85356	7.75593	7.4135	7.7973	7.80773	7.80934
1110012L19Rik	7.64815	7.64241	7.92762	7.81363	5.95239	6.14649	6.00845	6.46169	6.10713	6.18009	5.96078	6.30183	5.84344	5.85801	6.04668	6.03297	5.92735	5.90112	5.64462	5.55204	5.90499	5.75836	5.91752	6.06315	6.08177	5.99398	5.88863	6.27097	7.64694	7.40152	7.53874	7.41206	7.39125	7.61915	7.62649	7.87504	7.59338	7.56655	7.66116	7.43179	7.37166	7.51109	7.92155	7.52352	7.35764	7.16255	7.78287	7.81904	7.92409
1110015O18Rik	3.0418	3.0418	3.0418	3.0418	3.0418	3.0418	3.0418	3.0418	3.0418	3.0418	3.0418	3.0418	3.0418	3.0418	3.0418	3.0418	3.0418	3.0418	3.0418	3.0418	3.0418	3.0418	3.0418	3.0418	3.0418	3.0418	3.0418	3.0418	3.0418	3.0418	3.0418	3.0418	3.0418	3.0418	3.0418	3.0418	3.0418	3.0418	3.0418	3.0418	3.0418	3.0418	3.0418	3.0418	3.0418	3.0418	3.0418	3.0418	3.0418
1110017D15Rik	3.0418	3.0418	3.0418	3.0418	3.0418	3.53686	3.0418	3.63962	3.47186	3.46455	3.0418	3.0418	3.37071	3.0418	3.53327	3.31103	3.40864	3.44682	3.0418	3.0418	3.37344	3.35796	3.53713	3.41859	3.0418	3.0418	3.34794	3.30456	3.0418	3.0418	3.0418	3.0418	3.5401	3.0418	3.0418	3.47886	3.43815	3.0418	3.0418	3.0418	3.0418	3.0418	3.62738	3.55409	3.0418	3.0418	3.0418	3.0418	3.0418
1110019D14Rik	4.84357	5.27455	5.47754	5.275	4.66911	4.9005	4.56706	4.34354	4.53111	4.55843	4.61642	4.44833	4.31825	4.7848	4.69574	4.54499	4.83532	4.71727	4.33953	4.12378	4.53342	4.37473	4.22742	4.61044	4.59157	4.27193	4.36643	4.56984	5.62003	4.90182	3.63087	5.19593	5.41491	5.26399	5.31166	5.73544	5.24104	5.49324	5.86647	4.97744	5.53316	5.14328	5.40528	4.78972	5.38358	5.27991	5.44785	5.19542	6.13878
1110020A21Rik	4.09768	4.08514	4.16255	4.20014	3.0418	3.73856	3.97064	3.46602	3.64778	3.82584	3.0418	3.51431	3.69544	3.85862	3.81341	3.84041	3.40864	3.6791	3.63768	3.75942	3.70079	3.6704	3.73895	4.08751	3.55311	3.72963	3.78484	4.04077	3.55793	4.0188	5.93792	4.46461	4.62243	4.71501	4.49409	4.70336	4.13968	4.69384	4.71012	4.45796	4.16174	4.23294	4.87206	4.05106	4.27865	3.71203	4.29641	4.07468	4.43091
1110025L11Rik	3.0418	3.0418	3.0418	3.0418	3.0418	3.0418	3.0418	3.0418	3.0418	3.0418	3.0418	3.0418	3.0418	3.0418	3.0418	3.0418	3.0418	3.0418	3.0418	3.0418	3.0418	3.0418	3.0418	3.0418	3.0418	3.0418	3.0418	3.0418	3.0418	3.53725	3.0418	3.0418	3.0418	3.0418	3.0418	3.0418	3.0418	3.0418	3.0418	3.0418	3.0418	3.0418	3.0418	3.0418	3.0418	3.0418	3.0418	3.0418	3.0418
1110028F11Rik	3.0418	3.0418	3.69955	3.0418	3.84881	3.64666	3.65579	3.63962	3.78132	3.76892	3.0418	3.37666	3.37071	3.45428	3.81341	3.79578	3.7697	3.32866	3.63768	3.0418	3.77702	3.0418	3.53713	3.57317	3.40429	3.0418	3.57008	3.62615	3.92661	3.89182	4.43946	3.85269	3.89661	3.9128	4.31189	3.90628	3.91734	4.41337	3.91006	3.53069	3.57998	4.02319	3.86444	3.76258	3.0418	3.0418	3.64758	4.07468	3.86398
1110028F18Rik	3.0418	3.0418	3.0418	3.0418	3.0418	3.0418	3.0418	3.0418	3.0418	3.0418	3.0418	3.0418	3.0418	3.0418	3.0418	3.0418	3.0418	3.0418	3.0418	3.0418	3.0418	3.0418	3.0418	3.0418	3.0418	3.0418	3.0418	3.0418	3.0418	3.0418	3.0418	3.0418	3.5401	3.0418	3.0418	3.0418	3.0418	3.0418	3.0418	3.0418	3.0418	3.0418	3.0418	3.0418	3.0418	3.0418	3.0418	3.0418	3.0418
1110032A03Rik	6.19355	6.26797	6.0625	5.85041	5.4956	5.93992	5.78434	5.42151	5.69065	5.72614	5.51259	5.34518	5.6291	5.34176	5.66789	5.66674	5.59257	5.41433	5.46421	5.23048	6.12299	5.79048	5.33182	5.91991	5.25603	5.54893	5.35279	5.77278	6.70376	6.43133	6.12499	6.97849	7.08779	7.02708	6.62326	6.58089	6.11438	6.58455	6.52302	6.2054	6.26741	6.55394	6.5884	6.92951	6.79678	6.26893	6.54065	6.45832	6.44514
1110032F04Rik	10.1695	10.1925	10.313	10.3421	11.0045	10.9422	11.5383	11.3935	12.2675	12.5364	10.9754	11.124	11.5614	11.1792	12.4296	12.1622	10.8351	10.7712	11.6473	11.6888	12.6126	12.5994	10.7873	10.6685	11.1699	11.3747	12.5389	12.2273	10.9197	11.1114	10.1117	9.6929	9.63351	9.59211	9.89849	10.1545	9.36761	10.2342	10.6566	10.0433	10.0613	10.2282	9.67886	9.95765	10.1832	10.4875	10.4413	10.0704	9.81013
1110034G24Rik	7.45905	7.59276	6.95307	6.87648	6.3533	6.43767	6.36231	6.50828	6.80825	6.87502	6.33217	6.38967	6.30018	6.09476	6.89666	6.87554	6.44999	6.78904	6.39339	6.46763	7.135	6.91569	6.7548	6.85644	6.24178	6.30747	6.83463	7.11005	7.41397	7.62626	8.78437	5.87571	6.57191	6.22622	6.48282	6.81494	6.85747	6.67286	6.88955	7.11052	7.11152	7.17692	7.3385	7.23202	7.23945	7.21638	6.71378	7.03728	7.09671
1110036E04Rik	3.0418	3.0418	3.0418	3.0418	3.0418	3.0418	3.0418	3.0418	3.0418	3.0418	3.0418	3.0418	3.0418	3.0418	3.0418	3.0418	3.0418	3.0418	3.0418	3.0418	3.0418	3.0418	3.0418	3.0418	3.0418	3.0418	3.0418	3.0418	3.0418	3.0418	3.0418	3.0418	3.0418	3.0418	3.0418	3.0418	3.0418	3.0418	3.0418	3.0418	3.0418	3.0418	3.0418	3.0418	3.0418	3.0418	3.0418	3.0418	3.45704
1110037F02Rik	11.6173	11.5439	11.6853	11.6737	11.906	11.8192	12.0761	12.0822	12.0387	12.0122	11.9584	11.8887	12.0221	12.0244	12.0042	12.0286	11.8231	11.879	11.886	11.8793	11.9746	11.9841	12.0133	11.9058	12.0874	12.0477	12.0737	11.9544	11.7988	11.4097	11.7263	11.4907	11.5986	11.5423	11.7518	11.601	11.7637	11.6586	11.9222	11.4744	11.6771	11.5945	11.6509	11.4063	11.4814	11.5616	11.5298	11.4265	11.1643
1110038B12Rik	9.86387	9.78751	9.77172	9.74083	8.96212	9.04169	8.84543	9.01586	8.82606	8.82527	8.63927	8.84329	8.82501	8.82492	8.8109	8.74012	8.75571	9.00608	9.07115	9.15208	8.36097	8.32378	8.66354	8.83592	8.81913	8.81986	8.76254	9.02105	9.73581	10.2362	7.46092	10.1008	9.97675	9.44936	9.63798	10.2469	9.76925	10.2792	9.88842	10.122	9.90962	9.89921	9.67644	10.2352	9.8967	9.81385	10.3497	10.3694	10.7591
1110038F14Rik	8.73202	8.6551	8.7125	8.85904	7.87428	7.96715	7.76518	8.12638	7.83129	8.02901	7.91695	8.06854	7.97355	8.05699	8.08455	7.96595	8.01515	8.17326	8.06461	8.03528	7.96095	7.90051	8.00769	7.92317	8.03259	7.99243	7.90841	8.14758	8.0409	8.20833	7.98223	8.25757	8.23368	8.40544	8.40258	8.35647	8.22376	8.22874	8.18509	8.97245	8.74101	8.76841	8.70239	8.62226	8.63087	8.66945	8.70672	8.80721	9.3003
1110046J04Rik	3.79656	3.65281	3.0418	3.0418	3.55615	3.0418	3.0418	3.0418	3.0418	3.0418	3.0418	3.61924	3.37071	3.45428	3.73356	3.31103	3.0418	3.61273	3.46464	3.0418	3.50979	3.6704	3.0418	3.41859	3.55311	3.44142	3.0418	3.68106	4.27493	3.73911	3.63087	3.45123	4.02426	4.04269	3.79057	4.00486	3.99809	3.54267	3.82067	3.88077	3.69906	4.4819	4.04282	3.76258	3.70192	3.71203	3.64758	3.51157	3.75618
1110051M20Rik	7.35427	7.28051	7.48327	7.32239	7.33074	7.29957	7.26036	7.24387	7.15404	7.06809	7.25857	7.38877	6.83149	6.9742	7.35486	7.22092	7.44291	7.12709	6.98965	6.93884	7.19668	6.86227	7.42583	7.63781	6.92462	6.82223	7.1628	7.28547	7.33983	7.20397	6.31573	7.3892	7.47428	7.70379	7.49635	7.11476	7.36011	7.43033	6.81233	7.82767	7.83862	8.07497	7.93785	7.55612	7.72432	7.53132	7.48898	7.68322	7.37341
1110054M08Rik	4.25257	4.43116	4.59137	4.2757	4.16913	3.81897	3.97064	4.45898	4.22891	4.55843	4.34725	4.34	4.11044	4.52433	4.21858	4.46066	4.32526	4.37216	4.45466	4.53986	4.85758	4.68642	3.89162	4.49148	3.84411	4.00575	4.39695	4.49152	5.20981	4.4757	5.14726	4.56158	4.74646	4.8901	4.65032	4.17335	5.02341	4.33038	4.13069	4.77391	4.46571	4.85699	5.25064	4.66313	4.63533	4.96275	4.53066	5.08093	5.01016
1110057K04Rik	9.53515	9.47587	9.72349	9.83862	10.0592	10.0267	10.2221	10.1332	10.3355	10.3333	10.2544	10.268	10.0836	10.1585	10.2648	10.2737	10.2359	10.3041	10.1109	10.2436	10.2362	10.1675	10.2817	10.139	10.203	10.2596	10.251	10.3086	9.9806	9.92	9.57735	9.73081	10.0035	9.91623	10.0074	10.4197	10.068	10.3749	10.4534	10.3171	10.4363	10.2842	10.4801	10.1892	10.0809	10.1762	10.3201	10.2924	10.3688
1110058L19Rik	7.36104	7.50003	7.63028	7.43366	5.62881	5.7385	5.78434	5.82973	5.84064	5.83141	6.26533	5.57221	5.37465	5.732	5.40501	5.77943	5.73342	5.77498	5.41508	5.36348	5.53858	5.5854	5.53539	5.69719	5.7229	5.48686	5.36642	5.55698	7.11364	6.58783	6.0031	6.92376	7.17982	7.05544	7.57584	6.95501	6.68298	6.68705	6.69669	7.35796	7.34096	7.36244	7.44508	7.1701	7.03516	6.84298	6.6513	7.01772	7.6603
1110059E24Rik	8.82545	8.85993	8.92391	8.80068	7.84134	7.92703	8.09611	8.20569	7.97365	7.99313	7.74541	7.75659	7.82264	7.9303	7.86302	7.98739	7.70266	7.78133	7.82698	7.75838	7.7006	7.5851	8.07223	7.815	8.1029	7.94849	7.85368	8.27306	9.44301	8.70548	7.62281	8.47362	8.57527	8.65294	8.62622	8.7167	9.10948	8.95006	8.99784	8.34276	8.15285	8.18712	8.56499	8.291	8.23661	8.11896	8.6888	8.57691	8.94361
1110059G10Rik	7.82017	7.96634	8.0841	8.17515	7.03632	7.31299	7.47661	7.55089	7.28636	7.38102	7.40432	7.38492	7.17099	7.87298	7.20207	7.33614	7.41143	7.38352	7.16524	7.2137	7.16176	7.02575	7.506	7.46833	7.33397	7.47768	7.01645	7.46436	8.17468	7.28809	8.22997	7.47311	7.86098	7.90988	8.11428	7.95701	7.94097	7.89946	8.12912	8.03115	7.97131	8.11677	8.25959	7.86009	7.85048	8.08728	7.68282	7.96368	8.07519
1110065P20Rik	7.74452	7.74696	7.97837	7.97389	7.23747	7.29055	7.22173	7.07705	7.04914	7.23136	7.44979	7.40787	7.33792	7.1154	7.24872	6.97499	7.23248	7.31989	7.17954	7.41516	6.97313	6.99902	7.17417	7.29709	7.33397	7.20593	6.9997	7.19639	5.90891	7.34156	5.46499	6.80756	6.76974	6.7706	6.57221	6.86317	5.80509	6.6146	6.39064	7.22579	6.77816	7.07431	6.56748	7.13811	7.32636	7.26258	7.23686	7.26988	7.1537
1190002F15Rik	8.15993	8.33818	8.46467	8.34106	5.62881	5.66901	5.68633	5.98763	6.24847	6.24325	6.23068	5.97911	5.92897	6.13765	6.36155	6.34361	5.86117	6.02414	5.80396	5.50732	6.63328	6.16004	5.84408	6.23751	5.93915	5.87165	5.94301	6.4183	8.53125	8.33652	6.03458	8.03304	8.3303	8.39884	8.17787	8.3396	7.70588	8.03812	7.96827	8.44517	8.17908	8.47912	8.52513	8.22671	8.15009	8.21	7.83041	7.95345	8.49908
1190002N15Rik	10.2261	10.1058	9.94615	9.87963	9.73133	9.81246	9.99979	9.76938	9.89578	9.94236	9.74318	9.73695	9.76726	9.98211	10.0373	10.0799	10.0193	9.70109	9.76597	9.54521	9.86161	9.68445	9.74567	9.92098	9.71972	9.74854	9.9788	10.1101	10.2236	9.71807	10.2665	9.51076	9.90241	9.70873	10.0027	8.97221	10.5216	9.27597	9.35291	9.02099	8.64397	9.12635	9.18574	9.02823	9.02519	9.67915	8.77627	8.87647	9.02007
1190003K10Rik	3.0418	3.0418	3.0418	3.0418	3.0418	3.0418	3.0418	3.0418	3.0418	3.0418	3.0418	3.0418	3.0418	3.0418	3.0418	3.0418	3.0418	3.0418	3.46464	3.0418	3.0418	3.0418	3.0418	3.0418	3.0418	3.0418	3.0418	3.0418	3.0418	3.0418	3.0418	3.0418	3.0418	3.0418	3.0418	3.0418	3.0418	3.0418	3.0418	3.0418	3.0418	3.53954	3.45728	3.0418	3.0418	3.0418	3.0418	3.0418	3.0418
1190005I06Rik	5.07344	5.51487	5.07084	4.74061	5.15907	4.57995	5.09467	5.28989	4.85124	4.82371	5.10176	4.72124	5.27784	4.66183	4.30742	4.99495	4.67794	4.75635	5.55741	5.89981	5.11341	5.0294	4.61378	4.75204	5.00581	4.9766	4.97426	5.05902	4.7396	5.86952	3.0418	4.986	4.80393	5.11362	5.02387	4.70336	4.37153	4.81213	4.81792	5.81561	5.43654	5.3039	4.87206	5.75597	6.07709	5.57342	4.76774	5.08093	5.3546
1190007I07Rik	7.01904	7.07859	7.30363	7.31514	5.77889	6.10546	5.8243	6.00412	5.42301	5.74589	6.04334	5.77868	5.77563	5.75072	5.53509	5.48771	5.91437	5.97165	5.68622	5.6373	5.46667	5.7031	5.73969	5.54387	5.33631	5.52855	5.39326	5.64093	7.02165	7.48305	5.83404	6.80756	7.16988	6.70037	7.24921	7.52681	7.33231	8.08153	7.48388	7.08019	7.19406	6.95223	7.0909	6.99057	7.02869	6.83534	7.51251	7.61991	7.94839
1200014J11Rik	10.8048	10.7353	10.7919	10.7452	10.5816	10.5231	10.757	10.7176	10.9383	11.0124	10.912	10.6433	10.7796	10.8616	10.8947	10.9477	10.7345	10.6418	10.7241	10.7832	11.2214	11.2693	10.8705	10.6045	10.8682	10.9185	10.8854	10.9718	11.0075	10.5511	10.4254	10.4415	10.6421	10.4769	10.7038	10.6285	11.0105	10.673	10.8196	10.3628	10.4205	10.5184	10.4528	10.7112	10.5378	10.5014	10.528	10.3808	10.4652
1300002E11Rik	7.01043	6.75558	6.90122	6.81598	7.14313	7.25852	7.42234	7.42983	7.97787	7.71083	7.41964	7.12339	7.26297	7.46532	7.74776	7.81548	7.46059	7.16383	7.11404	7.22044	8.46105	8.39192	7.3755	7.23334	7.35259	7.32547	7.64654	7.59911	8.14782	7.5451	9.86699	7.52644	7.37406	7.96457	8.06008	7.9166	7.97727	7.71185	7.90669	7.42378	7.38677	7.35371	7.59144	7.15952	7.52766	7.47851	7.41601	7.21088	7.5267
1300002K09Rik	3.0418	3.47545	3.0418	3.48967	3.0418	3.39271	3.0418	3.0418	3.0418	3.0418	3.0418	3.0418	3.0418	3.45428	3.0418	3.0418	3.0418	3.0418	3.0418	3.0418	3.0418	3.0418	3.0418	3.0418	3.40429	3.0418	3.0418	3.0418	3.0418	3.0418	3.0418	3.0418	3.0418	3.0418	3.0418	3.0418	3.43815	3.0418	3.0418	4.1153	3.0418	3.0418	3.0418	3.0418	3.0418	3.0418	3.0418	3.0418	3.0418
1300017J02Rik	3.0418	3.0418	3.0418	3.0418	3.67012	3.53686	3.74903	3.46602	3.64778	3.87854	3.0418	3.70711	3.37071	3.0418	3.81341	3.69659	3.0418	3.6791	3.76908	3.45895	3.8455	3.80871	3.0418	3.41859	3.40429	3.0418	3.47394	3.56516	3.0418	3.53725	3.0418	3.61891	3.0418	3.40188	3.57419	3.65758	3.0418	3.90095	3.0418	3.88077	3.0418	3.53954	3.45728	3.55409	3.0418	3.90206	3.0418	3.70328	3.75618
1500004A13Rik	5.43776	5.24495	5.25577	5.14375	6.64999	6.38745	6.57755	6.67056	6.40886	6.52255	6.45706	6.33441	6.51394	6.68995	6.46857	6.56757	6.39547	6.40808	6.6928	6.70826	6.72613	6.84735	6.36298	6.45959	6.42142	6.59283	6.54744	6.54748	6.59592	6.36355	6.63395	6.14842	6.58699	6.35127	6.12815	6.28637	6.80164	6.42397	6.78833	6.76099	6.33181	6.55394	6.38793	6.10859	6.18684	6.51933	6.67243	6.8172	6.24846
1500009C09Rik	3.0418	3.0418	3.5089	3.0418	3.0418	3.0418	3.0418	3.0418	3.0418	3.0418	3.0418	3.0418	3.0418	3.0418	3.0418	3.0418	3.67382	3.44682	3.46464	3.75942	3.70079	3.0418	3.0418	3.0418	3.0418	3.0418	3.0418	3.0418	3.0418	3.0418	3.0418	3.0418	3.0418	3.66229	3.0418	3.0418	3.0418	3.54267	3.43477	3.0418	3.69906	3.0418	3.0418	3.0418	3.0418	3.0418	3.0418	3.0418	3.0418
1500009L16Rik	4.75635	4.73726	4.59137	4.53231	4.05501	4.12835	3.83058	3.63962	4.39081	4.50762	3.98009	4.26094	4.11044	4.03583	4.75403	4.73191	3.99741	4.12874	3.46464	3.45895	4.24981	4.34143	3.73895	4.7182	3.55311	3.60516	4.26906	4.82371	5.16537	4.79486	3.63087	4.95297	4.8588	5.60266	5.12707	4.44138	3.91734	4.62995	3.99018	5.44482	5.0695	5.66602	5.803	4.35818	5.02295	5.32599	4.41994	4.76498	4.62746
1500011B03Rik	8.30733	8.26266	8.15199	8.09715	7.23747	7.35253	7.24599	7.2507	6.70437	6.69726	7.15247	7.30972	7.00645	7.03535	6.65411	6.71801	7.08619	7.02546	7.18663	7.02621	6.82453	6.84735	7.16431	7.29709	7.09489	6.97659	6.88116	6.9035	7.27165	7.42647	8.37626	7.99952	7.67007	8.00862	7.80565	8.13186	7.44041	8.03261	7.84623	7.90451	7.90998	7.93008	7.71956	7.588	7.58161	7.64021	8.03492	7.91179	8.07886
1500011K16Rik	8.43785	8.58075	8.6133	8.49623	5.86167	5.92816	5.657	5.71348	5.63679	5.69597	6.15871	5.51531	5.37465	5.46193	5.45527	5.72424	5.95297	6.11668	5.36407	5.61648	5.7699	5.62178	5.869	5.68098	5.39348	5.48686	5.50781	5.82361	7.02165	7.85158	6.15387	7.52644	7.48233	7.58074	7.36322	7.01596	6.80975	7.06903	6.85916	7.74006	7.33058	7.85177	7.11265	8.13268	7.90788	7.51234	7.40348	7.66452	8.55815
1500012F01Rik	12.1637	12.0437	12.5873	12.3291	9.32667	9.54664	9.26319	9.56598	9.15198	9.13594	9.78213	9.64277	9.49464	9.52656	9.16151	9.09234	9.03879	9.14244	8.89877	9.08366	8.65036	8.67877	9.69367	9.29501	9.39402	9.52145	8.80038	9.21776	11.3412	10.9984	9.77828	10.9993	11.3936	10.9267	11.4294	11.9977	11.2126	11.9841	11.7465	11.5319	11.196	10.8988	11.3498	11.4535	10.9788	10.5808	12.1274	11.825	11.81
1500012K07Rik	3.0418	3.0418	3.0418	3.0418	3.0418	3.0418	3.0418	3.0418	3.0418	3.0418	3.0418	3.0418	3.0418	3.0418	3.0418	3.0418	3.0418	3.0418	3.0418	3.0418	3.0418	3.0418	3.0418	3.0418	3.0418	3.0418	3.0418	3.0418	3.55793	3.0418	3.0418	3.0418	3.0418	3.0418	3.0418	3.0418	3.0418	3.0418	3.0418	3.53069	3.57998	3.0418	3.45728	3.0418	3.42512	3.0418	3.0418	3.0418	3.0418
1500015A07Rik	5.65771	5.73969	6.20744	6.02302	6.8159	6.86729	6.88701	6.90566	6.77933	6.7414	5.32305	6.82617	5.53575	6.70889	5.66789	6.60669	5.86117	5.52448	5.51162	5.71755	5.64624	5.90227	5.36797	5.56179	5.63217	5.48686	5.4707	5.56562	6.19117	5.68487	7.25224	7.48393	7.25695	7.17907	7.13706	6.32844	6.07418	6.64403	6.06826	6.59882	6.6331	6.35706	6.52468	5.83943	6.233	6.30276	5.98379	5.93471	6.54484
1500015L24Rik	3.0418	3.0418	3.0418	3.0418	3.0418	3.0418	3.0418	3.0418	3.0418	3.0418	3.0418	3.0418	3.0418	3.0418	3.0418	3.0418	3.0418	3.0418	3.0418	3.0418	3.0418	3.0418	3.0418	3.0418	3.0418	3.0418	3.0418	3.0418	3.0418	3.0418	3.0418	3.0418	3.0418	3.0418	3.0418	3.0418	3.0418	3.0418	3.0418	3.0418	3.0418	3.0418	3.0418	3.0418	3.0418	3.0418	3.0418	3.0418	3.0418
1500015O10Rik	3.0418	3.47545	3.0418	3.67269	3.55615	4.07491	3.97064	3.88141	3.64778	4.0996	3.98009	3.9163	4.01227	3.45428	4.17093	3.69659	3.92875	3.93604	3.76908	3.96214	4.07089	4.07054	3.73895	3.78914	4.10772	3.44142	3.99431	3.62615	3.55793	3.0418	3.63087	3.85269	3.5401	3.0418	3.57419	3.47886	3.43815	3.0418	3.91006	3.88077	3.79861	3.53954	3.62738	3.55409	3.0418	3.81346	3.64758	3.70328	3.62704
1500017E21Rik	3.48085	3.0418	3.0418	3.0418	3.67012	3.53686	3.39806	3.63962	3.47186	3.34126	3.0418	3.78404	3.60906	3.7515	3.39016	3.79578	4.12	3.32866	3.46464	3.86768	3.61373	3.6704	3.53713	3.57317	3.66641	3.44142	3.65069	3.49566	3.55793	3.0418	3.0418	3.45123	3.0418	3.54972	3.57419	3.0418	3.72407	3.0418	3.82067	3.53069	3.42345	3.53954	3.0418	3.0418	3.42512	3.59066	3.98954	3.70328	3.62704
1600002D24Rik	3.0418	3.0418	3.0418	3.0418	3.40646	3.0418	3.0418	3.46602	3.0418	3.0418	3.0418	3.0418	3.0418	3.0418	3.0418	3.0418	3.40864	3.44682	3.46464	3.0418	3.61373	3.35796	3.0418	3.69079	3.0418	3.0418	3.47394	3.0418	3.0418	3.53725	3.0418	3.61891	3.0418	3.40188	3.0418	3.0418	3.0418	3.0418	3.0418	3.53069	3.0418	4.02319	3.0418	3.0418	3.0418	3.0418	3.47172	3.51157	3.75618
1600002H07Rik	8.12458	8.15286	8.05603	7.99669	7.62224	7.7674	7.76518	7.92377	7.76184	7.87322	7.46463	7.63551	7.71739	7.66678	7.8985	7.7648	7.64971	7.75535	7.84051	7.7491	7.99103	7.92195	7.66105	7.79308	7.80848	7.82025	7.7992	8.00858	7.9505	7.96365	5.46499	7.8777	8.03498	7.9556	7.69928	7.87504	8.15572	7.79247	7.89927	8.02057	8.13212	8.16239	7.98566	8.19605	8.08628	8.14688	8.15175	8.04781	8.09709
1600002K03Rik	8.14824	8.13756	8.24609	8.34817	6.22507	6.41278	6.17111	6.27186	6.17585	6.12893	6.57183	6.4503	6.30018	6.33444	6.30929	6.40424	6.10891	6.27298	6.2642	6.091	5.67188	5.46999	6.34551	6.36294	6.07043	6.18523	6.01235	6.30674	7.72177	7.64054	7.03894	7.36597	7.29401	7.48413	7.51439	7.89366	7.48653	7.83114	7.78312	7.98291	7.92384	8.05898	7.93785	7.99691	7.90436	7.51234	7.9428	7.84141	8.12223
1600010M07Rik	3.0418	3.0418	3.0418	3.0418	3.0418	3.0418	3.0418	3.0418	3.0418	3.0418	3.0418	3.0418	3.0418	3.0418	3.0418	3.0418	3.0418	3.0418	3.0418	3.0418	3.0418	3.0418	3.0418	3.0418	3.0418	3.0418	3.0418	3.0418	3.0418	3.0418	3.0418	3.0418	3.0418	3.40188	3.0418	3.0418	3.43815	3.74667	3.0418	3.0418	3.0418	3.0418	3.0418	3.0418	3.0418	3.0418	3.0418	3.51157	3.0418
1600012H06Rik	8.44104	8.33818	8.29094	8.36227	7.61055	7.68041	7.84663	7.84936	7.85908	7.78034	8.01085	7.70814	7.91559	7.91009	7.81121	7.82284	7.68773	7.55154	7.88908	7.79492	7.75131	7.68886	7.6819	7.86835	7.98571	7.72794	7.72489	7.91334	8.44121	7.93499	9.64414	8.08368	8.18035	8.41201	8.57991	8.11213	8.5969	7.97046	8.2419	8.28648	8.08666	8.11677	8.35971	7.91764	8.14115	8.33662	8.29409	8.14986	8.16778
1600014C10Rik	9.13062	9.15192	9.15529	8.95056	8.70841	8.86658	8.45912	8.16658	10.8288	10.7966	8.87932	8.66305	8.58116	8.40757	10.5401	10.3765	8.8441	9.02972	8.5077	8.46728	11.4042	11.2207	8.56611	8.86068	8.27842	8.35687	10.4283	10.308	9.67129	9.53561	9.98862	9.63228	9.3928	9.52503	9.17728	8.51814	9.53388	8.69119	8.444	8.95312	8.68723	8.90283	8.93106	8.53103	8.68314	8.75051	8.75674	8.71038	9.08904
1600014C23Rik	3.0418	3.47545	3.5089	3.48967	3.55615	3.64666	3.65579	3.46602	3.0418	3.55864	3.0418	3.51431	3.50595	3.7515	3.39016	3.31103	3.0418	3.0418	3.46464	3.0418	3.0418	3.0418	3.0418	3.41859	3.55311	3.44142	3.0418	3.41288	3.76793	3.89182	3.0418	3.61891	3.0418	3.75649	3.57419	3.0418	3.43815	3.0418	3.59585	3.0418	3.0418	3.89567	3.45728	3.0418	3.0418	3.59066	3.0418	3.0418	3.45704
1600014K23Rik	3.0418	3.0418	3.0418	3.0418	3.0418	3.0418	3.0418	3.0418	3.0418	3.0418	3.0418	3.0418	3.0418	3.0418	3.0418	3.0418	3.0418	3.0418	3.0418	3.0418	3.0418	3.0418	3.0418	3.0418	3.0418	3.0418	3.0418	3.0418	3.0418	3.0418	3.0418	3.0418	3.0418	3.0418	3.0418	3.0418	3.0418	3.0418	3.0418	3.0418	3.0418	3.0418	3.0418	3.0418	3.0418	3.71203	3.0418	3.0418	3.0418
1600015I10Rik	3.0418	3.0418	3.0418	3.0418	3.0418	3.0418	3.0418	3.0418	3.0418	3.0418	3.0418	3.0418	3.0418	3.0418	3.0418	3.0418	3.0418	3.0418	3.0418	3.0418	3.0418	3.0418	3.0418	3.0418	3.0418	3.0418	3.34794	3.41288	3.0418	3.0418	3.0418	3.0418	3.0418	3.0418	3.0418	3.0418	3.0418	3.0418	3.0418	3.53069	3.0418	3.0418	3.0418	3.0418	3.0418	3.0418	3.0418	3.0418	3.0418
1600016N20Rik	5.41095	4.86474	4.94556	4.69192	5.3281	5.72488	5.70077	5.73355	5.89636	5.69597	5.17977	5.66639	5.65463	5.61396	5.58081	5.81	5.68806	5.39118	5.2837	5.17327	5.90499	6.05907	5.13449	6.26993	5.48364	5.37661	5.48318	5.60797	6.23315	5.56701	5.76019	5.85887	6.23075	6.29492	5.77965	5.62552	4.72311	5.3533	5.03779	5.81561	5.62334	6.20872	5.97371	5.50485	6.01218	6.33581	5.52155	5.89173	5.56447
1600019K03Rik	3.0418	3.0418	3.0418	3.0418	3.0418	3.0418	3.0418	3.0418	3.0418	3.0418	3.0418	3.0418	3.0418	3.0418	3.0418	3.0418	3.0418	3.0418	3.0418	3.0418	3.0418	3.0418	3.0418	3.0418	3.0418	3.0418	3.0418	3.0418	3.0418	3.0418	3.0418	3.0418	3.0418	3.0418	3.0418	3.0418	3.0418	3.0418	3.0418	3.0418	3.0418	3.0418	3.0418	3.0418	3.0418	3.0418	3.0418	3.0418	3.0418
1600020E01Rik	6.76617	6.77558	6.79151	6.53201	6.37204	6.73352	6.66686	6.72078	6.48271	6.67719	6.33217	6.31821	6.27611	6.64148	6.46061	6.51366	6.14256	5.99439	6.18059	6.13498	6.39725	6.26934	6.27341	6.38281	6.53239	6.36484	6.04578	6.34164	7.20007	6.17833	8.4121	6.46736	6.91988	6.54859	6.93707	6.21333	6.93361	6.65851	6.93396	6.92948	6.81597	7.2256	7.20999	7.24209	7.03516	6.80436	6.79304	6.82849	6.98334
1600023N17Rik	4.38637	3.99755	3.69955	4.11812	3.55615	3.81897	3.39806	3.0418	3.34646	3.46455	3.0418	3.37666	3.69544	3.0418	3.64229	3.31103	3.0418	3.32866	3.76908	3.62972	3.50979	3.58724	3.0418	3.57317	3.0418	3.60516	3.0418	3.49566	4.36751	4.0188	4.19703	4.02871	4.3241	4.4711	3.57419	4.17335	3.91734	3.90095	3.91006	3.72997	4.03476	3.7423	4.19043	4.05106	4.03899	4.39897	4.36001	4.65732	3.95803
1600025M17Rik	3.0418	3.0418	3.0418	3.0418	3.0418	3.0418	3.0418	3.0418	3.0418	3.0418	3.0418	3.0418	3.0418	3.0418	3.0418	3.0418	3.0418	3.0418	3.46464	3.0418	3.0418	3.0418	3.0418	3.0418	3.0418	3.0418	3.0418	3.30456	3.0418	3.0418	3.0418	3.0418	3.0418	3.0418	3.0418	3.0418	3.0418	3.0418	3.0418	3.0418	3.0418	3.0418	3.0418	3.0418	3.0418	3.59066	3.0418	3.0418	3.0418
1600027J07Rik	3.0418	3.0418	3.0418	3.0418	3.0418	3.0418	3.0418	3.0418	3.0418	3.0418	3.0418	3.0418	3.0418	3.0418	3.0418	3.0418	3.0418	3.0418	3.0418	3.0418	3.0418	3.0418	3.0418	3.0418	3.0418	3.0418	3.0418	3.0418	3.0418	3.0418	3.0418	3.0418	3.0418	3.0418	3.0418	3.0418	3.0418	3.0418	3.0418	3.0418	3.0418	3.0418	3.0418	3.0418	3.0418	3.0418	3.0418	3.0418	3.0418
1600029I14Rik	3.0418	3.47545	3.69955	3.48967	3.55615	3.0418	3.54436	3.0418	3.0418	3.55864	3.0418	3.0418	3.37071	3.0418	3.0418	3.57794	3.40864	3.32866	3.46464	3.86768	3.50979	3.58724	3.0418	3.41859	3.40429	3.0418	3.0418	3.30456	3.0418	3.53725	3.0418	3.0418	3.0418	3.40188	3.0418	3.65758	3.72407	3.0418	3.82067	3.0418	3.0418	3.0418	3.45728	3.55409	3.42512	3.59066	3.0418	3.0418	3.0418
1600029O15Rik	3.0418	3.0418	3.0418	3.48967	3.84881	3.64666	3.74903	3.97733	3.78132	4.01805	3.0418	3.70711	3.77107	4.11213	3.53327	3.88245	3.7697	3.44682	3.0418	3.0418	3.50979	3.74323	4.01857	3.69079	3.40429	3.60516	3.57008	3.62615	3.55793	3.89182	4.43946	3.74631	3.74308	3.98031	3.95391	3.47886	3.82725	3.54267	3.71833	3.72997	3.57998	4.32274	3.0418	4.52109	3.96754	3.90206	4.15559	3.70328	4.11901
1700001C02Rik	3.0418	3.0418	3.0418	3.0418	3.0418	3.0418	3.0418	3.0418	3.0418	3.0418	3.0418	3.0418	3.0418	3.0418	3.0418	3.0418	3.0418	3.0418	3.46464	3.0418	3.0418	3.0418	3.0418	3.0418	3.0418	3.0418	3.0418	3.0418	3.0418	3.0418	3.0418	3.0418	3.0418	3.0418	3.0418	3.0418	3.0418	3.0418	3.0418	3.0418	3.0418	3.0418	3.0418	3.0418	3.0418	3.0418	3.0418	3.0418	3.0418
1700001C19Rik	3.0418	3.0418	3.0418	3.0418	3.0418	3.0418	3.0418	3.0418	3.0418	3.0418	3.0418	3.0418	3.0418	3.0418	3.0418	3.31103	3.0418	3.0418	3.0418	3.0418	3.37344	3.6704	3.0418	3.0418	3.0418	3.0418	3.34794	3.62615	3.55793	3.0418	3.0418	3.0418	3.0418	3.0418	3.0418	3.0418	3.0418	3.0418	3.0418	4.00621	3.0418	3.0418	3.0418	3.0418	3.0418	3.0418	3.0418	3.0418	3.0418
1700001D01Rik	4.17829	3.78741	3.0418	3.81149	3.55615	4.17885	4.09008	4.28064	3.56755	3.55864	3.71101	3.61924	4.11044	3.7515	3.53327	3.92228	3.7697	3.84412	3.97436	4.04673	3.61373	3.97577	3.73895	4.25863	3.84411	3.83361	3.65069	3.62615	3.55793	3.89182	3.63087	3.45123	4.55506	3.40188	4.49409	4.00486	4.26237	3.54267	4.54904	3.53069	3.42345	4.02319	3.45728	3.92015	3.70192	3.59066	3.64758	3.96943	3.45704
1700001F09Rik	3.0418	3.0418	3.0418	3.0418	3.0418	3.0418	3.0418	3.0418	3.0418	3.0418	3.0418	3.0418	3.0418	3.0418	3.0418	3.0418	3.0418	3.0418	3.0418	3.0418	3.0418	3.0418	3.0418	3.0418	3.0418	3.0418	3.0418	3.0418	3.0418	3.0418	3.0418	3.0418	3.0418	3.0418	3.0418	3.0418	3.0418	3.0418	3.0418	3.0418	3.0418	3.0418	3.0418	3.0418	3.0418	3.0418	3.0418	3.0418	3.0418
1700001G11Rik	4.96377	4.86474	4.98871	5.07279	4.448	4.35809	4.29026	4.21354	4.19312	4.0996	3.71101	4.02925	4.11044	4.03583	4.21858	4.21496	3.99741	4.19551	3.97436	4.19485	4.07089	4.11432	4.47538	4.25863	4.04918	3.83361	4.19846	4.3156	5.20981	4.6775	3.86928	4.81132	5.3796	4.8901	4.72115	4.65555	4.64488	4.75445	5.17431	4.87987	4.77189	5.09982	4.9778	5.19598	4.59655	3.98149	4.4767	4.40595	4.31747
1700001G17Rik	4.17829	3.89967	4.32591	4.02797	3.99191	4.2268	3.90379	3.97733	4.07678	3.82584	3.71101	3.78404	3.77107	4.24802	3.81341	4.03111	3.85353	4.16272	3.97436	4.12378	4.07089	3.92401	3.89162	3.95219	4.10772	4.00575	3.84295	4.04077	4.53141	4.4757	4.54259	3.85269	4.13521	4.15555	4.31189	4.09306	3.99809	4.41337	4.13069	4.30112	4.46571	4.32274	4.04282	4.44271	4.51478	4.61865	4.22854	4.16871	4.4834
1700001J03Rik	3.0418	3.0418	3.0418	3.0418	3.0418	3.0418	3.0418	3.0418	3.0418	3.0418	3.0418	3.0418	3.0418	3.0418	3.73356	3.42199	3.55921	3.44682	3.46464	3.0418	3.61373	3.48803	3.0418	3.41859	3.0418	3.0418	3.47394	3.56516	3.0418	3.0418	3.63087	3.0418	3.0418	3.40188	3.0418	3.0418	3.43815	3.0418	3.43477	3.53069	3.0418	3.89567	3.0418	3.0418	3.42512	3.0418	3.0418	3.0418	3.62704
1700001J11Rik	3.0418	3.0418	3.0418	3.0418	3.40646	3.0418	3.39806	3.0418	3.0418	3.34126	3.0418	3.37666	3.0418	3.0418	3.39016	3.0418	3.55921	3.44682	3.46464	3.0418	3.0418	3.0418	3.0418	3.0418	3.0418	3.44142	3.0418	3.0418	3.55793	3.0418	3.0418	5.42408	4.74646	5.15839	4.49409	4.55355	3.72407	3.0418	3.43477	3.0418	3.0418	3.0418	3.0418	3.55409	3.0418	3.0418	3.47172	3.0418	3.45704
1700001K19Rik	3.79656	4.08514	4.39865	4.41172	4.11386	4.2268	4.24397	4.28064	4.44912	4.24366	4.34725	4.41343	4.31825	4.11213	4.26399	4.03111	4.3706	4.28771	4.13797	4.72132	4.46925	4.60959	4.12893	4.14808	4.1627	4.00575	4.30256	4.33927	4.05841	3.73911	3.63087	3.74631	4.02426	3.83887	4.31189	4.31616	3.72407	4.0292	4.25248	3.72997	4.03476	4.02319	4.04282	4.66313	4.16646	3.81346	4.07645	3.84851	3.62704
1700001K23Rik	3.91013	3.0418	3.5089	3.67269	3.84881	3.73856	3.65579	3.46602	3.64778	4.01805	3.71101	3.61924	3.83903	3.45428	4.06766	4.09661	3.85353	3.53704	3.87872	3.75942	4.11895	4.49841	3.53713	3.69079	3.40429	3.72963	3.72133	3.73136	3.55793	3.89182	4.19703	3.45123	3.5401	3.0418	3.79057	3.0418	3.43815	3.0418	4.13069	3.53069	3.88559	3.53954	3.75658	3.92015	3.42512	3.0418	3.47172	3.70328	3.45704
1700001L05Rik	5.74513	5.60929	5.25577	5.6294	7.69781	7.65255	8.0139	8.03062	6.63605	6.61523	6.42685	6.55743	7.45238	7.38551	6.50766	6.50447	7.55826	7.66754	7.20771	7.17949	7.33627	7.33784	6.92824	7.1026	7.48926	6.90918	6.32218	6.30674	7.06838	6.36355	6.0031	7.00885	7.59789	7.33969	7.45955	6.44763	6.67411	6.83456	7.3863	6.36601	6.2114	6.2473	6.26293	5.63618	6.11463	7.22224	6.73401	6.77115	6.54484
1700001L19Rik	3.0418	3.0418	3.0418	3.0418	3.40646	3.0418	3.0418	3.0418	3.0418	3.0418	3.0418	3.0418	3.0418	3.0418	3.0418	3.0418	3.0418	3.0418	3.0418	3.0418	3.0418	3.0418	3.0418	3.0418	3.0418	3.0418	3.34794	3.0418	3.0418	3.0418	3.0418	3.61891	3.0418	3.75649	3.0418	3.0418	3.0418	3.0418	3.0418	3.0418	3.0418	3.0418	3.0418	3.0418	3.0418	3.0418	3.0418	3.0418	3.0418
1700001O22Rik	5.20645	4.98022	4.64891	4.91778	5.84821	6.2441	5.62702	5.47073	5.70118	5.76536	6.33217	6.01998	5.52188	5.26408	5.43873	5.64134	6.29968	6.197	5.57975	5.41316	6.86859	6.89166	5.91752	6.32236	5.14825	5.12408	5.53199	5.69677	5.2944	5.40364	3.86928	5.25015	5.01015	5.7659	5.31166	5.0999	4.89887	5.19688	5.09415	5.86471	5.62334	5.69461	6.00547	5.78436	6.18684	6.0993	5.47287	5.42911	5.74618
1700001P01Rik	4.17829	3.89967	4.06899	4.34594	4.16913	4.07491	3.83058	3.88141	3.71809	3.82584	3.71101	4.02925	3.69544	4.03583	3.39016	3.96019	4.06085	3.73882	3.46464	3.96214	3.77702	3.97577	3.73895	3.95219	3.76121	3.92439	3.89674	3.62615	3.55793	4.12918	3.63087	4.1045	3.74308	4.20719	3.57419	3.79319	3.82725	4.0292	3.82067	3.88077	3.69906	3.89567	4.04282	4.16478	3.96754	3.59066	4.29641	4.07468	3.86398
1700003C15Rik	3.0418	3.0418	3.0418	3.0418	3.0418	3.0418	3.0418	3.0418	3.0418	3.0418	3.0418	3.0418	3.0418	3.0418	3.0418	3.0418	3.0418	3.0418	3.0418	3.0418	3.0418	3.0418	3.0418	3.0418	3.0418	3.0418	3.0418	3.0418	3.0418	3.0418	3.0418	3.0418	3.0418	3.0418	3.0418	3.0418	3.0418	3.0418	3.0418	3.0418	3.0418	3.0418	3.0418	3.0418	3.0418	3.0418	3.0418	3.0418	3.0418
1700003D09Rik	3.0418	3.47545	3.0418	3.48967	3.0418	3.0418	3.0418	3.0418	3.0418	3.0418	3.0418	3.0418	3.0418	3.0418	3.0418	3.0418	3.0418	3.0418	3.0418	3.0418	3.37344	3.0418	3.0418	3.0418	3.40429	3.0418	3.34794	3.30456	3.0418	3.53725	3.0418	3.0418	3.0418	3.40188	3.0418	3.0418	3.0418	3.0418	3.0418	3.53069	3.57998	3.0418	3.86444	3.0418	3.0418	3.0418	3.0418	3.0418	3.0418
1700003E16Rik	3.66036	3.99755	3.96428	4.02797	3.40646	3.73856	3.83058	3.46602	3.47186	3.76892	4.34725	3.97471	3.95861	3.85862	3.81341	3.69659	3.67382	3.0418	3.63768	3.62972	3.37344	3.0418	3.89162	4.30956	3.9185	3.92439	3.65069	3.68106	4.05841	3.73911	3.0418	3.85269	3.74308	3.66229	3.79057	3.65758	3.60058	3.0418	3.0418	3.72997	4.03476	4.02319	3.45728	3.0418	3.70192	4.44655	3.98954	4.07468	3.62704
1700003E24Rik	3.0418	3.0418	3.0418	3.0418	3.0418	3.0418	3.0418	3.0418	3.0418	3.0418	3.0418	3.0418	3.0418	3.0418	3.0418	3.0418	3.0418	3.0418	3.0418	3.0418	3.0418	3.0418	3.0418	3.0418	3.0418	3.0418	3.0418	3.0418	3.0418	3.0418	3.0418	3.0418	3.0418	3.0418	3.0418	3.0418	3.0418	3.0418	3.0418	3.0418	3.0418	3.0418	3.0418	3.0418	3.0418	3.0418	3.0418	3.0418	3.0418
1700003F12Rik	3.79656	3.47545	3.5089	4.02797	4.11386	3.95709	4.1954	3.97733	4.5826	4.39838	4.18146	4.12899	4.55262	4.24802	4.12076	4.41593	4.12	4.12874	4.05998	4.19485	4.70661	4.73497	3.53713	4.30956	4.1627	4.38184	4.30256	4.00813	3.92661	3.89182	3.86928	4.02871	4.23421	3.9128	4.2071	3.79319	3.72407	3.90095	4.06324	3.88077	3.42345	3.53954	3.0418	4.26617	3.70192	3.81346	3.64758	3.70328	3.62704
1700003G13Rik	3.0418	3.0418	3.0418	3.0418	3.0418	3.0418	3.0418	3.0418	3.0418	3.0418	3.0418	3.0418	3.0418	3.0418	3.0418	3.0418	3.0418	3.0418	3.0418	3.0418	3.0418	3.0418	3.0418	3.0418	3.0418	3.0418	3.0418	3.30456	3.0418	3.0418	3.0418	3.0418	3.0418	3.0418	3.0418	3.0418	3.0418	3.0418	3.0418	3.0418	3.0418	3.0418	3.45728	3.0418	3.0418	3.0418	3.0418	3.0418	3.45704
1700003G18Rik	3.0418	3.47545	3.0418	3.0418	3.0418	3.0418	3.0418	3.0418	3.0418	3.0418	3.0418	3.37666	3.0418	3.45428	3.0418	3.0418	3.0418	3.0418	3.0418	3.0418	3.0418	3.0418	3.0418	3.0418	3.0418	3.0418	3.0418	3.0418	3.55793	3.0418	3.0418	3.94554	3.89661	3.66229	3.79057	3.47886	3.0418	3.74667	3.43477	3.0418	3.69906	3.0418	3.75658	3.0418	3.58233	3.0418	3.47172	3.70328	3.62704
1700003H04Rik	3.0418	3.0418	3.0418	3.48967	3.0418	3.0418	3.0418	3.0418	3.0418	3.0418	3.0418	3.0418	3.0418	3.0418	3.0418	3.0418	3.0418	3.0418	3.0418	3.0418	3.0418	3.0418	3.0418	3.0418	3.0418	3.0418	3.0418	3.0418	3.0418	3.0418	3.0418	3.0418	3.0418	3.0418	3.0418	3.0418	3.0418	3.0418	3.0418	3.0418	3.0418	3.0418	3.0418	3.0418	3.0418	3.0418	3.0418	3.0418	3.0418
1700003L19Rik	3.0418	3.0418	3.0418	3.0418	3.0418	3.0418	3.0418	3.0418	3.0418	3.0418	3.0418	3.0418	3.0418	3.0418	3.0418	3.42199	3.0418	3.0418	3.0418	3.0418	3.0418	3.0418	3.0418	3.0418	3.0418	3.0418	3.0418	3.0418	3.0418	3.0418	3.0418	3.0418	3.0418	3.0418	3.0418	3.0418	3.0418	3.0418	3.0418	3.0418	3.0418	3.0418	3.0418	3.0418	3.0418	3.0418	3.0418	3.0418	3.0418
1700003M02Rik	3.0418	3.0418	3.0418	3.48967	3.0418	3.0418	3.0418	3.0418	3.47186	3.46455	3.0418	3.37666	3.0418	3.45428	3.0418	3.42199	3.40864	3.0418	3.0418	3.62972	3.37344	3.0418	3.0418	3.41859	3.0418	3.0418	3.34794	3.0418	3.0418	3.0418	3.0418	3.0418	3.0418	3.40188	3.0418	3.0418	3.0418	3.0418	3.0418	3.72997	3.0418	3.0418	3.45728	3.0418	3.0418	3.0418	3.0418	3.0418	3.0418
1700003M07Rik	4.09768	3.47545	4.06899	4.11812	3.55615	3.53686	3.97064	3.63962	3.34646	3.0418	3.98009	3.70711	4.01227	4.11213	3.0418	3.0418	3.0418	3.44682	3.46464	3.0418	3.0418	3.35796	4.12893	3.69079	3.98642	4.14837	3.47394	3.41288	3.0418	3.53725	3.0418	3.45123	3.0418	3.40188	3.0418	3.65758	4.47037	3.0418	3.71833	3.72997	3.9636	3.7423	3.75658	3.55409	3.70192	3.0418	4.58214	4.25419	3.45704
1700003P14Rik	3.0418	3.0418	3.0418	3.0418	3.40646	3.39271	3.0418	3.0418	3.34646	3.46455	3.0418	3.0418	3.0418	3.0418	3.0418	3.31103	3.0418	3.32866	3.0418	3.0418	3.0418	3.0418	3.0418	3.0418	3.40429	3.0418	3.34794	3.0418	3.0418	3.0418	3.0418	3.0418	3.0418	3.0418	3.0418	3.0418	3.0418	3.0418	3.0418	3.0418	3.42345	3.53954	3.62738	3.0418	3.0418	3.0418	3.47172	3.0418	3.0418
1700006A11Rik	3.0418	3.0418	3.0418	3.0418	3.0418	3.0418	3.0418	3.0418	3.0418	3.0418	3.0418	3.0418	3.0418	3.0418	3.0418	3.0418	3.0418	3.0418	3.0418	3.0418	3.0418	3.0418	3.0418	3.0418	3.0418	3.0418	3.0418	3.0418	3.0418	3.0418	3.0418	3.0418	3.0418	3.0418	3.0418	3.0418	3.0418	3.0418	3.0418	3.0418	3.0418	3.0418	3.0418	3.0418	3.0418	3.0418	3.0418	3.70328	3.0418
1700006E09Rik	3.0418	3.0418	3.0418	3.0418	3.0418	3.0418	3.0418	3.0418	3.0418	3.0418	3.0418	3.0418	3.0418	3.0418	3.0418	3.0418	3.0418	3.0418	3.0418	3.0418	3.0418	3.0418	3.0418	3.0418	3.0418	3.0418	3.0418	3.0418	3.0418	3.0418	3.0418	3.0418	3.0418	3.0418	3.0418	3.0418	3.0418	3.0418	3.0418	3.0418	3.0418	3.0418	3.0418	3.0418	3.0418	3.0418	3.0418	3.0418	3.0418
1700006F04Rik	3.0418	3.0418	3.0418	3.0418	3.0418	3.0418	3.0418	3.0418	3.0418	3.0418	3.0418	3.0418	3.0418	3.0418	3.0418	3.0418	3.0418	3.0418	3.0418	3.0418	3.0418	3.0418	3.0418	3.0418	3.0418	3.0418	3.0418	3.0418	3.0418	3.0418	3.0418	3.0418	3.0418	3.0418	3.0418	3.0418	3.0418	3.0418	3.43477	3.0418	3.0418	3.0418	3.0418	3.0418	3.0418	3.0418	3.0418	3.0418	3.0418
1700006H21Rik	3.0418	3.0418	3.0418	3.0418	3.0418	3.0418	3.0418	3.0418	3.0418	3.34126	3.0418	3.0418	3.0418	3.0418	3.0418	3.0418	3.40864	3.0418	3.0418	3.0418	3.0418	3.0418	3.0418	3.0418	3.0418	3.0418	3.0418	3.0418	3.0418	3.0418	3.0418	3.0418	3.0418	3.0418	3.0418	3.0418	3.0418	3.0418	3.0418	3.0418	3.0418	3.0418	3.0418	3.0418	3.0418	3.0418	3.0418	3.0418	3.62704
1700007B14Rik	3.0418	3.0418	3.0418	3.0418	3.0418	3.0418	3.0418	3.0418	3.0418	3.0418	3.0418	3.0418	3.37071	3.0418	3.0418	3.0418	3.0418	3.32866	3.0418	3.45895	3.0418	3.35796	3.53713	3.0418	3.0418	3.0418	3.0418	3.30456	3.0418	3.0418	3.0418	3.0418	3.0418	3.0418	3.0418	3.0418	3.43815	3.0418	3.0418	3.0418	3.42345	3.89567	3.0418	3.0418	3.0418	3.0418	3.0418	3.0418	3.45704
1700007F19Rik	3.0418	3.0418	3.0418	3.0418	3.0418	3.0418	3.0418	3.0418	3.0418	3.0418	3.0418	3.0418	3.0418	3.0418	3.0418	3.0418	3.0418	3.0418	3.0418	3.0418	3.0418	3.0418	3.0418	3.0418	3.0418	3.0418	3.0418	3.30456	3.0418	3.0418	3.0418	3.45123	3.0418	3.40188	3.0418	3.0418	3.43815	3.0418	3.43477	3.0418	3.0418	3.0418	3.0418	3.0418	3.0418	3.0418	3.0418	3.0418	3.45704
1700007G11Rik	3.0418	3.0418	3.0418	3.48967	3.0418	3.0418	3.0418	3.0418	3.0418	3.0418	3.0418	3.0418	3.0418	3.0418	3.0418	3.0418	3.0418	3.32866	3.46464	3.0418	3.0418	3.0418	3.0418	3.0418	3.55311	3.0418	3.0418	3.0418	3.0418	3.0418	3.0418	3.0418	3.0418	3.0418	3.57419	3.0418	3.0418	3.0418	3.0418	3.53069	3.0418	3.0418	3.45728	3.0418	3.0418	3.0418	3.0418	3.0418	3.0418
1700007J10Rik	3.48085	3.99755	4.06899	3.67269	4.05501	4.39837	3.97064	4.28064	4.22891	4.27655	4.49006	4.72124	3.77107	4.42228	4.12076	3.92228	3.85353	4.01839	4.13797	3.86768	4.02006	4.2714	4.12893	4.49148	4.21464	3.92439	3.84295	4.00813	3.92661	3.89182	5.31564	3.85269	3.74308	3.98031	4.08947	4.55355	4.86568	4.0292	4.78305	4.21267	3.57998	4.23294	4.04282	4.26617	3.88922	3.43106	4.76774	4.07468	3.75618
1700007K09Rik	3.0418	3.65281	3.0418	3.0418	3.55615	3.53686	3.54436	4.06321	3.71809	3.46455	3.0418	3.0418	3.0418	3.45428	3.0418	3.74806	3.0418	3.0418	3.0418	3.45895	3.37344	3.6704	3.0418	3.87509	3.66641	3.44142	3.57008	3.62615	3.55793	3.73911	3.0418	3.61891	4.02426	3.75649	3.57419	4.00486	3.99809	3.90095	3.71833	4.1153	3.42345	3.89567	3.62738	3.76258	3.58233	3.0418	3.89244	3.51157	3.75618
1700007K13Rik	3.66036	4.43116	4.59137	4.87583	4.05501	3.73856	4.14424	3.77143	3.71809	3.9278	3.98009	4.30124	3.95861	3.9521	3.81341	3.64038	3.0418	3.44682	3.46464	3.0418	3.77702	3.48803	4.01857	4.02253	3.84411	4.14837	3.47394	3.41288	3.76793	3.89182	3.0418	3.45123	4.13521	3.83887	3.0418	4.83626	4.7965	4.81213	4.97881	4.45796	4.77189	4.4819	4.71521	4.35818	4.03899	4.29681	5.39638	4.65732	4.67171
1700007L15Rik	5.80723	5.60929	6.02379	6.2243	4.82582	4.82122	4.60147	4.86838	4.47714	4.39838	4.61642	4.66595	4.63962	4.70426	4.60248	4.36925	5.00078	5.16225	4.69885	4.95029	4.75907	4.71094	4.67714	4.84819	4.81631	4.69697	4.48361	4.4289	5.33475	4.54704	4.95361	5.44717	5.30603	5.28413	5.77965	5.42878	5.47045	5.4596	5.73646	5.50886	5.43654	5.4471	5.33021	5.43408	5.42499	5.41364	5.47287	5.39814	6.01979
1700007P06Rik	3.0418	3.0418	3.0418	3.0418	3.0418	3.0418	3.0418	3.0418	3.0418	3.0418	3.0418	3.0418	3.0418	3.0418	3.0418	3.0418	3.0418	3.0418	3.0418	3.0418	3.0418	3.0418	3.0418	3.0418	3.0418	3.0418	3.0418	3.0418	3.0418	3.0418	3.0418	3.0418	3.0418	3.0418	3.0418	3.0418	3.0418	3.0418	3.0418	3.0418	3.0418	3.0418	3.62738	3.0418	3.0418	3.0418	3.0418	3.0418	3.0418
1700008F21Rik	3.0418	3.0418	3.0418	3.0418	3.0418	3.0418	3.0418	3.0418	3.0418	3.0418	3.0418	3.0418	3.0418	3.0418	3.0418	3.0418	3.0418	3.0418	3.0418	3.45895	3.0418	3.35796	3.0418	3.0418	3.0418	3.0418	3.0418	3.0418	3.0418	3.0418	3.63087	3.45123	3.0418	3.0418	3.0418	3.0418	3.0418	3.0418	3.0418	3.0418	3.0418	3.0418	3.0418	3.0418	3.0418	3.0418	3.0418	3.0418	3.0418
1700008I05Rik	3.0418	3.47545	3.5089	3.0418	3.40646	3.53686	3.0418	3.0418	3.0418	3.0418	3.71101	3.51431	3.0418	3.0418	3.0418	3.0418	3.67382	3.44682	3.46464	3.62972	3.0418	3.58724	3.53713	3.41859	3.55311	3.60516	3.57008	3.0418	3.0418	3.0418	3.0418	3.61891	3.5401	3.98031	3.79057	3.65758	3.0418	3.74667	3.0418	3.53069	4.37401	3.0418	3.0418	3.55409	3.70192	3.0418	3.47172	3.0418	3.75618
1700008J07Rik	6.26826	6.3772	6.40022	6.14391	7.05373	6.79239	6.49044	6.74039	6.88713	6.83034	6.91331	6.7259	6.94711	6.64148	6.66105	6.58509	6.96729	6.94709	6.71266	6.7741	7.40129	7.70269	6.71472	6.29113	6.58082	6.63991	6.63712	6.30674	6.8314	7.45099	7.92546	7.19191	7.08779	6.97459	6.82551	6.86317	6.85747	6.92107	6.92665	7.23499	7.0932	7.03111	6.5569	6.91698	7.21687	6.84298	7.16439	7.11295	6.60762
1700008K24Rik	3.0418	3.0418	3.0418	3.0418	3.0418	3.0418	3.0418	3.0418	3.0418	3.0418	3.0418	3.0418	3.0418	3.0418	3.0418	3.0418	3.0418	3.0418	3.46464	3.0418	3.0418	3.0418	3.0418	3.41859	3.0418	3.0418	3.34794	3.30456	3.0418	3.0418	3.0418	3.0418	3.0418	3.0418	3.0418	3.0418	3.0418	3.0418	3.0418	3.88077	3.0418	3.0418	3.0418	3.76258	3.0418	3.0418	3.0418	3.0418	3.0418
1700008O03Rik	4.00912	3.47545	3.96428	3.48967	3.67012	3.53686	3.39806	3.46602	3.64778	3.34126	3.0418	3.51431	3.37071	3.62318	3.64229	3.64038	3.7697	3.44682	3.63768	3.0418	3.37344	3.86859	3.0418	3.87509	3.66641	3.0418	3.47394	3.49566	3.55793	3.73911	3.86928	3.74631	3.5401	3.66229	4.2071	4.44138	3.0418	3.54267	3.82067	4.1153	4.03476	3.7423	3.86444	4.44271	3.88922	3.59066	3.89244	3.0418	3.62704
1700008P02Rik	3.0418	3.0418	3.0418	3.0418	3.0418	3.0418	3.0418	3.0418	3.0418	3.0418	3.0418	3.0418	3.0418	3.0418	3.0418	3.0418	3.0418	3.0418	3.0418	3.0418	3.0418	3.0418	3.0418	3.0418	3.40429	3.44142	3.0418	3.0418	3.0418	3.0418	3.0418	3.0418	3.0418	3.0418	3.0418	3.0418	3.0418	3.0418	3.0418	3.0418	3.42345	3.53954	3.45728	3.0418	3.0418	3.0418	3.0418	3.0418	3.0418
1700009C05Rik	3.0418	3.0418	3.0418	3.0418	3.0418	3.0418	3.0418	3.0418	3.0418	3.0418	3.0418	3.0418	3.0418	3.0418	3.0418	3.0418	3.0418	3.0418	3.0418	3.0418	3.0418	3.0418	3.0418	3.0418	3.0418	3.0418	3.0418	3.0418	3.0418	3.0418	3.0418	3.0418	3.5401	3.0418	3.0418	3.0418	3.0418	3.0418	3.43477	3.0418	3.0418	3.0418	3.0418	3.0418	3.0418	3.0418	3.0418	3.0418	3.0418
1700009J07Rik	3.0418	3.0418	3.0418	3.0418	3.0418	3.0418	3.0418	3.0418	3.0418	3.0418	3.0418	3.0418	3.0418	3.0418	3.0418	3.0418	3.0418	3.0418	3.0418	3.0418	3.37344	3.0418	3.0418	3.0418	3.0418	3.0418	3.0418	3.0418	3.0418	3.0418	3.0418	3.0418	3.5401	3.0418	3.0418	3.0418	3.0418	3.0418	3.0418	3.0418	3.0418	3.0418	3.62738	3.0418	3.0418	3.0418	3.0418	3.0418	3.0418
1700009N14Rik	3.0418	3.0418	3.0418	3.0418	3.99191	3.81897	3.54436	3.63962	3.71809	3.82584	3.71101	3.78404	3.60906	4.1825	3.9506	3.57794	3.0418	3.44682	3.76908	3.0418	3.61373	3.58724	4.22742	3.41859	3.55311	3.44142	3.47394	3.68106	3.55793	3.53725	3.0418	3.61891	3.0418	4.10089	3.79057	4.24734	3.99809	3.74667	4.30811	3.0418	3.0418	3.53954	3.0418	3.55409	3.58233	3.90206	3.0418	4.16871	4.04227
1700009P17Rik	3.0418	3.0418	3.0418	3.0418	3.99191	4.27249	4.09008	3.88141	3.94275	3.82584	3.71101	4.21894	3.60906	3.7515	3.64229	4.03111	4.12	4.19551	4.13797	3.86768	3.50979	3.80871	3.73895	3.41859	3.84411	4.07992	3.78484	3.93875	4.17288	4.12918	3.0418	4.17442	4.02426	3.83887	3.57419	4.44138	4.07172	4.75445	4.41107	4.38246	4.59029	4.32274	4.48417	4.35818	4.55641	3.90206	4.22854	4.81537	4.67171
1700010B08Rik	3.0418	3.0418	3.0418	3.0418	3.0418	3.0418	3.0418	3.0418	3.0418	3.0418	3.0418	3.0418	3.0418	3.0418	3.0418	3.0418	3.0418	3.0418	3.0418	3.0418	3.0418	3.0418	3.0418	3.0418	3.0418	3.0418	3.0418	3.0418	3.0418	3.0418	3.0418	3.0418	3.0418	3.40188	3.0418	3.0418	3.43815	3.0418	3.0418	3.0418	3.0418	3.0418	3.0418	3.0418	3.0418	3.0418	3.0418	3.0418	3.45704
1700010D01Rik	3.0418	3.0418	3.0418	3.0418	3.0418	3.0418	3.0418	3.0418	3.0418	3.0418	3.0418	3.0418	3.0418	3.0418	3.0418	3.0418	3.0418	3.0418	3.0418	3.0418	3.0418	3.0418	3.0418	3.0418	3.0418	3.0418	3.0418	3.0418	3.0418	3.0418	3.0418	3.0418	3.0418	3.0418	3.0418	3.0418	3.0418	3.0418	3.0418	3.0418	3.0418	3.0418	3.0418	3.0418	3.0418	3.0418	3.0418	3.0418	3.0418
1700010I02Rik	3.0418	3.0418	3.0418	3.0418	3.0418	3.0418	3.0418	3.0418	3.0418	3.0418	3.0418	3.0418	3.0418	3.0418	3.0418	3.0418	3.0418	3.0418	3.0418	3.0418	3.0418	3.0418	3.0418	3.0418	3.0418	3.0418	3.0418	3.0418	3.0418	3.0418	3.0418	3.0418	3.0418	3.0418	3.0418	3.0418	3.0418	3.0418	3.0418	3.0418	3.0418	3.0418	3.0418	3.0418	3.0418	3.0418	3.0418	3.0418	3.0418
1700010I14Rik	6.52079	6.58464	6.64764	6.54452	6.11782	6.07388	6.24102	6.2987	5.97595	5.91196	6.19516	6.16342	6.11326	6.24601	5.95838	5.90494	5.90126	6.30949	6.16616	5.93356	6.10452	6.10203	6.23593	6.3529	6.23166	6.11988	5.78305	5.80927	6.37094	5.894	5.08591	5.97265	6.19163	6.20595	5.92419	6.53387	6.17893	6.45758	6.47356	6.46377	6.42321	6.62854	6.76406	6.47837	6.56532	6.82766	6.58595	6.72355	6.78088
1700010J16Rik	3.0418	3.0418	3.0418	3.0418	3.0418	3.0418	3.0418	3.0418	3.0418	3.0418	3.0418	3.0418	3.0418	3.0418	3.0418	3.0418	3.0418	3.0418	3.0418	3.0418	3.0418	3.0418	3.0418	3.0418	3.0418	3.0418	3.0418	3.0418	3.0418	3.0418	3.0418	3.0418	3.0418	3.0418	3.0418	3.0418	3.0418	3.0418	3.0418	3.0418	3.0418	3.0418	3.0418	3.0418	3.0418	3.0418	3.0418	3.0418	3.0418
1700010K23Rik	3.0418	3.0418	3.0418	3.0418	3.0418	3.0418	3.0418	3.0418	3.0418	3.0418	3.0418	3.0418	3.0418	3.0418	3.0418	3.0418	3.0418	3.0418	3.0418	3.0418	3.0418	3.0418	3.0418	3.0418	3.0418	3.0418	3.0418	3.0418	3.0418	3.0418	3.0418	3.0418	3.0418	3.0418	3.0418	3.0418	3.0418	3.0418	3.0418	3.0418	3.0418	3.0418	3.0418	3.0418	3.0418	3.0418	3.0418	3.0418	3.0418
1700011A15Rik	3.0418	3.0418	3.0418	3.0418	3.0418	3.0418	3.0418	3.0418	3.0418	3.0418	3.0418	3.0418	3.0418	3.0418	3.0418	3.0418	3.0418	3.0418	3.0418	3.0418	3.0418	3.0418	3.0418	3.0418	3.0418	3.0418	3.0418	3.0418	3.0418	3.0418	3.0418	3.0418	3.0418	3.0418	3.0418	3.0418	3.0418	3.0418	3.0418	3.53069	3.0418	3.0418	3.0418	3.0418	3.0418	3.0418	3.0418	3.0418	3.0418
1700011B04Rik	3.0418	3.0418	3.0418	3.0418	3.0418	3.0418	3.0418	3.0418	3.0418	3.0418	3.0418	3.0418	3.0418	3.0418	3.0418	3.0418	3.0418	3.0418	3.0418	3.0418	3.0418	3.0418	3.0418	3.0418	3.0418	3.0418	3.0418	3.0418	3.0418	3.0418	3.0418	3.0418	3.0418	3.0418	3.0418	3.0418	3.60058	3.0418	3.0418	3.0418	3.0418	3.0418	3.0418	3.0418	3.0418	3.0418	3.0418	3.0418	3.75618
1700011E24Rik	3.0418	3.47545	3.0418	3.0418	3.0418	3.0418	3.39806	3.0418	3.0418	3.46455	3.0418	3.37666	3.37071	3.0418	3.39016	3.31103	3.55921	3.32866	3.63768	3.0418	3.37344	3.35796	3.73895	3.0418	3.0418	3.0418	3.0418	3.62615	3.0418	3.0418	3.0418	3.74631	3.5401	3.40188	3.57419	3.65758	3.72407	3.54267	3.0418	3.0418	3.0418	3.53954	3.0418	3.0418	3.0418	3.0418	3.78108	3.70328	3.45704
1700011H14Rik	3.48085	3.47545	4.06899	3.67269	3.40646	3.89115	3.83058	3.88141	3.47186	3.63755	3.0418	3.51431	3.83903	3.45428	3.88511	3.69659	3.7697	3.6791	3.63768	3.45895	3.50979	3.48803	3.0418	3.41859	3.55311	3.44142	3.0418	3.62615	3.0418	3.0418	3.0418	3.0418	3.0418	3.75649	3.0418	3.0418	3.0418	3.54267	4.13069	3.0418	3.0418	3.53954	3.86444	3.55409	3.0418	3.0418	3.0418	3.0418	3.0418
1700011I03Rik	3.0418	3.0418	3.0418	3.0418	3.0418	3.0418	3.39806	3.0418	3.0418	3.0418	3.0418	3.0418	3.0418	3.45428	3.0418	3.0418	3.0418	3.0418	3.0418	3.0418	3.0418	3.0418	3.0418	3.0418	3.0418	3.44142	3.0418	3.0418	3.0418	3.0418	3.63087	3.45123	3.0418	3.0418	3.0418	3.0418	3.0418	3.0418	3.0418	3.53069	3.0418	3.0418	3.0418	3.0418	3.0418	3.0418	3.0418	3.0418	3.0418
1700011L22Rik	3.48085	3.0418	3.0418	3.0418	3.0418	3.0418	3.0418	3.0418	3.0418	3.0418	3.0418	3.0418	3.0418	3.45428	3.0418	3.0418	3.0418	3.0418	3.0418	3.0418	3.0418	3.0418	3.0418	3.0418	3.0418	3.0418	3.0418	3.0418	3.0418	3.0418	3.0418	3.0418	3.0418	3.0418	3.0418	3.0418	3.0418	3.0418	3.0418	3.0418	3.0418	3.0418	3.0418	3.0418	3.0418	3.0418	3.47172	3.0418	3.0418
1700011M02Rik	3.0418	3.0418	3.0418	3.0418	3.0418	3.0418	3.0418	3.0418	3.0418	3.0418	3.0418	3.0418	3.0418	3.0418	3.0418	3.0418	3.0418	3.0418	3.0418	3.0418	3.0418	3.0418	3.0418	3.0418	3.0418	3.0418	3.0418	3.0418	3.0418	3.0418	3.0418	3.0418	3.0418	3.0418	3.0418	3.0418	3.0418	3.0418	3.0418	3.0418	3.0418	3.0418	3.0418	3.0418	3.0418	3.0418	3.0418	3.0418	3.0418
1700012A03Rik	3.0418	3.0418	3.0418	3.0418	3.0418	3.0418	3.0418	3.0418	3.0418	3.0418	3.0418	3.0418	3.0418	3.0418	3.0418	3.0418	3.0418	3.0418	3.0418	3.0418	3.0418	3.0418	3.0418	3.0418	3.0418	3.0418	3.0418	3.0418	3.0418	3.0418	3.0418	3.0418	3.0418	3.0418	3.0418	3.0418	3.0418	3.0418	3.0418	3.0418	3.0418	3.0418	3.0418	3.0418	3.0418	3.0418	3.0418	3.70328	3.0418
1700012B07Rik	3.66036	3.65281	3.0418	3.48967	3.0418	3.0418	3.0418	3.0418	3.34646	3.0418	3.0418	3.0418	3.0418	3.0418	3.39016	3.42199	3.0418	3.0418	3.63768	3.45895	3.0418	3.0418	3.0418	3.0418	3.0418	3.0418	3.34794	3.0418	3.0418	3.0418	3.0418	3.0418	3.0418	3.0418	3.0418	3.0418	3.0418	3.0418	3.0418	3.53069	3.0418	3.0418	3.45728	3.55409	3.0418	3.0418	3.64758	3.51157	3.0418
1700012B09Rik	3.91013	3.47545	3.5089	3.0418	3.0418	3.0418	3.0418	3.0418	3.0418	3.0418	3.0418	3.0418	3.0418	3.0418	3.0418	3.0418	3.0418	3.0418	3.0418	3.0418	3.0418	3.0418	3.0418	3.0418	3.0418	3.0418	3.34794	3.0418	3.0418	3.0418	3.0418	3.0418	3.0418	3.0418	3.0418	3.0418	3.43815	3.0418	3.0418	3.53069	3.0418	3.53954	3.0418	3.0418	3.0418	3.0418	3.0418	3.70328	3.0418
1700012D01Rik	5.26818	5.33182	5.148	5.39434	5.53015	5.1754	5.26408	5.28989	4.90998	4.78341	5.32305	5.14999	5.56308	5.48472	4.80962	4.5245	4.49602	4.63501	4.39865	4.48958	4.02006	3.97577	4.73725	4.96567	5.412	5.39939	4.53779	4.40719	5.11936	4.54704	5.41704	5.44717	5.0568	4.86262	4.78799	5.22921	5.38337	5.15467	5.59285	4.71722	4.95883	5.14328	5.04364	4.66313	5.12931	5.18258	5.13627	5.30066	4.67171
1700012D14Rik	4.50506	4.59446	4.85449	4.69192	4.40644	4.51086	4.03244	4.06321	4.53111	4.20964	4.92982	4.21894	3.95861	4.30945	4.26399	4.24239	4.17556	4.19551	4.20988	4.261	4.46925	4.52725	4.31686	4.44882	3.9185	4.07992	4.45549	4.04077	4.36751	4.90182	4.43946	4.77318	4.55506	4.86262	4.40689	4.74932	4.561	4.49035	4.78305	5.02352	4.5088	4.80216	4.48417	4.66313	4.99492	4.12082	4.89017	4.91031	4.67171
1700012I11Rik	3.0418	3.0418	3.0418	3.0418	3.0418	3.0418	3.0418	3.0418	3.0418	3.0418	3.0418	3.0418	3.0418	3.0418	3.0418	3.0418	3.0418	3.0418	3.0418	3.0418	3.0418	3.0418	3.0418	3.0418	3.0418	3.0418	3.0418	3.0418	3.0418	3.0418	3.0418	3.0418	3.0418	3.0418	3.0418	3.0418	3.0418	3.54267	3.43477	3.0418	3.0418	3.0418	3.0418	3.0418	3.0418	3.0418	3.0418	3.70328	3.0418
1700012L04Rik	3.0418	3.0418	3.0418	3.0418	3.0418	3.0418	3.0418	3.0418	3.0418	3.0418	3.0418	3.0418	3.0418	3.0418	3.0418	3.0418	3.0418	3.0418	3.0418	3.0418	3.0418	3.0418	3.0418	3.0418	3.0418	3.0418	3.0418	3.0418	3.0418	3.0418	3.0418	3.0418	3.0418	3.0418	3.0418	3.0418	3.0418	3.0418	3.0418	3.0418	3.0418	3.0418	3.0418	3.0418	3.0418	3.0418	3.0418	3.0418	3.0418
1700012P22Rik	3.0418	3.0418	3.0418	3.0418	3.0418	3.39271	3.0418	3.0418	3.0418	3.0418	3.0418	3.0418	3.0418	3.0418	3.53327	3.0418	3.0418	3.0418	3.0418	3.0418	3.0418	3.0418	3.0418	3.0418	3.0418	3.0418	3.0418	3.0418	3.0418	3.0418	3.0418	3.0418	3.0418	3.0418	3.0418	3.0418	3.0418	3.0418	3.0418	3.53069	3.0418	3.0418	3.0418	3.0418	3.0418	3.0418	3.0418	3.0418	3.0418
1700013D24Rik	3.0418	3.0418	3.0418	3.0418	3.0418	3.0418	3.0418	3.0418	3.0418	3.0418	3.0418	3.0418	3.0418	3.0418	3.0418	3.0418	3.0418	3.0418	3.46464	3.0418	3.0418	3.0418	3.0418	3.0418	3.0418	3.44142	3.0418	3.0418	3.0418	3.0418	3.0418	3.0418	3.0418	3.0418	3.0418	3.0418	3.0418	3.0418	3.0418	3.72997	3.0418	3.53954	3.62738	3.0418	3.0418	3.0418	3.47172	3.0418	3.0418
1700013F07Rik	3.0418	3.0418	3.0418	3.0418	3.0418	3.0418	3.0418	3.0418	3.0418	3.0418	3.0418	3.37666	3.0418	3.0418	3.0418	3.0418	3.0418	3.0418	3.0418	3.0418	3.37344	3.35796	3.0418	3.0418	3.0418	3.0418	3.0418	3.0418	3.0418	3.0418	3.63087	3.45123	3.0418	3.0418	3.0418	3.0418	3.43815	3.0418	3.43477	3.0418	3.0418	3.53954	3.0418	3.55409	3.0418	3.0418	3.0418	3.0418	3.0418
1700013G24Rik	3.0418	3.0418	3.0418	3.0418	3.0418	3.0418	3.0418	3.0418	3.0418	3.0418	3.0418	3.0418	3.0418	3.0418	3.0418	3.0418	3.0418	3.0418	3.0418	3.0418	3.37344	3.0418	3.0418	3.0418	3.0418	3.0418	3.0418	3.30456	3.0418	3.0418	3.0418	3.0418	3.0418	3.0418	3.0418	3.0418	3.0418	3.0418	3.0418	3.0418	3.0418	3.0418	3.0418	3.0418	3.0418	3.0418	3.0418	3.0418	3.0418
1700013H16Rik	3.0418	3.0418	3.0418	3.0418	3.0418	3.0418	3.0418	3.0418	3.0418	3.0418	3.0418	3.0418	3.0418	3.0418	3.0418	3.0418	3.0418	3.0418	3.0418	3.0418	3.0418	3.0418	3.0418	3.0418	3.0418	3.0418	3.0418	3.0418	3.0418	3.0418	3.0418	3.0418	3.0418	3.0418	3.0418	3.0418	3.0418	3.0418	3.0418	3.0418	3.0418	3.0418	3.0418	3.0418	3.0418	3.0418	3.0418	3.0418	3.0418
1700015E13Rik	3.0418	3.0418	3.0418	3.0418	3.0418	3.39271	3.0418	3.46602	3.0418	3.0418	3.0418	3.0418	3.0418	3.0418	3.39016	3.31103	3.0418	3.0418	3.0418	3.45895	3.0418	3.0418	3.0418	3.0418	3.0418	3.0418	3.0418	3.0418	3.0418	3.53725	3.0418	3.45123	3.5401	3.0418	3.0418	3.47886	3.0418	3.0418	3.0418	3.72997	3.0418	3.0418	3.0418	3.0418	3.0418	3.59066	3.0418	3.0418	3.0418
1700015F17Rik	3.0418	3.47545	3.5089	3.0418	3.40646	3.0418	3.39806	3.0418	3.0418	3.0418	3.0418	3.0418	3.0418	3.0418	3.0418	3.0418	3.0418	3.0418	3.0418	3.45895	3.0418	3.0418	3.0418	3.0418	3.0418	3.44142	3.0418	3.30456	3.0418	3.0418	3.0418	3.0418	3.0418	3.40188	3.0418	3.0418	3.0418	3.0418	3.0418	3.0418	3.0418	3.7423	3.62738	3.0418	3.0418	3.0418	3.0418	3.0418	3.0418
1700015G11Rik	3.0418	3.0418	3.0418	3.0418	3.0418	3.0418	3.0418	3.0418	3.0418	3.0418	3.0418	3.0418	3.0418	3.0418	3.0418	3.0418	3.0418	3.0418	3.0418	3.0418	3.0418	3.35796	3.0418	3.0418	3.0418	3.0418	3.0418	3.0418	3.0418	3.0418	3.0418	3.0418	3.0418	3.0418	3.0418	3.0418	3.0418	3.0418	3.0418	3.0418	3.0418	3.0418	3.45728	3.0418	3.0418	3.0418	3.0418	3.0418	3.0418
1700016C15Rik	3.66036	3.0418	3.5089	3.92718	3.40646	3.64666	4.14424	3.97733	3.64778	3.46455	3.0418	3.78404	3.69544	3.9521	3.64229	3.57794	3.55921	3.44682	3.0418	3.86768	3.37344	3.6704	3.0418	3.69079	3.98642	3.92439	3.34794	3.49566	3.0418	3.53725	3.0418	3.61891	3.74308	3.40188	4.2071	3.79319	3.72407	3.0418	3.71833	3.0418	3.42345	3.53954	3.0418	3.0418	3.42512	4.12082	3.47172	3.51157	3.0418
1700016D06Rik	3.0418	3.0418	3.0418	3.0418	3.0418	3.39271	3.39806	3.46602	3.47186	3.63755	3.0418	3.0418	3.0418	3.0418	3.53327	3.31103	3.0418	3.32866	3.0418	3.0418	3.37344	3.35796	3.0418	3.0418	3.55311	3.0418	3.34794	3.56516	3.0418	3.0418	3.0418	3.0418	3.5401	3.75649	3.0418	3.0418	3.0418	3.0418	3.71833	3.0418	3.0418	3.0418	3.0418	3.0418	3.0418	3.43106	3.47172	3.0418	3.45704
1700016G22Rik	3.0418	3.0418	3.5089	3.67269	3.0418	3.39271	3.39806	3.0418	3.0418	3.46455	3.0418	3.37666	3.0418	3.0418	3.39016	3.31103	3.0418	3.44682	3.76908	3.0418	3.0418	3.35796	3.89162	3.57317	3.0418	3.44142	3.0418	3.30456	3.55793	3.53725	3.0418	3.45123	3.0418	3.75649	3.79057	3.90628	3.60058	3.54267	3.0418	3.0418	3.79861	3.53954	3.0418	3.0418	3.0418	3.0418	3.0418	3.51157	3.0418
1700016H13Rik	3.0418	3.0418	3.0418	3.0418	3.0418	3.39271	3.0418	3.0418	3.0418	3.0418	3.0418	3.51431	3.0418	3.0418	3.0418	3.0418	3.40864	3.0418	3.0418	3.0418	3.0418	3.0418	3.0418	3.0418	3.0418	3.0418	3.0418	3.0418	3.0418	3.0418	3.0418	3.0418	3.5401	3.66229	3.95391	3.90628	3.0418	3.54267	3.71833	3.53069	3.0418	3.0418	3.0418	3.0418	3.0418	3.0418	3.0418	3.51157	3.62704
1700016K19Rik	3.79656	4.08514	4.32591	4.53231	3.76545	3.64666	4.03244	4.28064	3.0418	3.46455	4.34725	3.70711	3.83903	4.03583	3.0418	3.0418	3.55921	3.89146	3.63768	3.45895	3.0418	3.48803	3.73895	3.87509	3.9185	3.60516	3.47394	3.68106	3.0418	3.73911	3.86928	3.85269	3.89661	4.10089	3.0418	3.47886	3.91734	3.0418	3.91006	3.53069	3.42345	3.0418	4.04282	4.16478	3.80188	3.98149	3.47172	3.51157	3.62704
1700016L04Rik	3.0418	3.0418	3.5089	3.81149	3.55615	3.0418	3.39806	3.0418	3.0418	3.0418	3.98009	3.0418	3.0418	3.0418	3.39016	3.0418	3.0418	3.0418	3.0418	3.45895	3.37344	3.35796	3.53713	3.0418	3.0418	3.0418	3.47394	3.30456	3.0418	3.0418	3.0418	3.0418	3.0418	3.0418	3.0418	3.65758	3.0418	3.54267	3.0418	3.0418	3.42345	3.0418	3.62738	3.0418	3.0418	3.0418	3.0418	3.51157	3.45704
1700016L21Rik	3.0418	3.0418	3.0418	3.0418	3.0418	3.0418	3.0418	3.0418	3.0418	3.0418	3.0418	3.0418	3.0418	3.0418	3.0418	3.0418	3.0418	3.0418	3.0418	3.0418	3.0418	3.0418	3.0418	3.0418	3.0418	3.0418	3.0418	3.0418	5.16537	5.00027	4.04864	3.61891	3.0418	3.40188	3.0418	3.0418	3.0418	3.0418	3.59585	3.0418	3.0418	3.0418	3.0418	3.0418	3.0418	3.0418	3.0418	3.0418	4.37572
1700016P04Rik	3.0418	3.0418	3.0418	3.0418	3.0418	3.0418	3.0418	3.0418	3.0418	3.0418	3.0418	3.0418	3.0418	3.0418	3.0418	3.0418	3.0418	3.32866	3.0418	3.0418	3.0418	3.0418	3.0418	3.0418	3.0418	3.0418	3.0418	3.0418	3.0418	3.0418	3.0418	3.0418	3.0418	3.0418	3.0418	3.0418	3.0418	3.0418	3.0418	3.0418	3.0418	3.0418	3.0418	3.0418	3.0418	3.0418	3.0418	3.0418	3.0418
1700017B05Rik	8.88297	8.68958	8.82762	8.88857	10.9573	10.8119	11.0194	10.9277	10.9453	10.9762	10.2264	10.5892	11.4401	10.9738	10.8907	10.8357	10.3929	10.4456	11.0841	11.2401	10.1688	10.3276	10.3472	10.4418	11.0495	11.1121	11.3337	11.0922	9.25203	10.0498	10.3884	8.55275	8.46205	8.15686	7.86308	8.72452	9.2346	8.86262	8.83836	10.0143	9.99732	9.88267	9.49719	9.14249	9.82223	9.71273	9.35556	9.28173	9.00471
1700017D01Rik	3.0418	3.0418	3.0418	3.0418	3.0418	3.0418	3.0418	3.46602	3.0418	3.34126	3.0418	3.0418	3.0418	3.0418	3.0418	3.0418	3.0418	3.32866	3.46464	3.0418	3.0418	3.35796	3.0418	3.0418	3.0418	3.0418	3.47394	3.0418	3.0418	3.0418	3.0418	3.0418	3.74308	3.0418	3.0418	3.0418	3.0418	3.0418	3.43477	3.0418	3.0418	3.53954	3.0418	3.55409	3.0418	3.0418	3.0418	3.0418	3.0418
1700017G19Rik	3.0418	3.0418	3.0418	3.0418	3.0418	3.0418	3.0418	3.0418	3.0418	3.0418	3.0418	3.0418	3.0418	3.0418	3.0418	3.0418	3.0418	3.0418	3.0418	3.0418	3.0418	3.0418	3.0418	3.0418	3.0418	3.0418	3.0418	3.0418	3.0418	3.0418	3.0418	3.0418	3.0418	3.0418	3.0418	3.47886	3.0418	3.0418	3.59585	3.0418	3.0418	3.0418	3.0418	3.0418	3.0418	3.0418	3.0418	3.0418	3.45704
1700017J07Rik	3.0418	3.0418	3.0418	3.0418	3.0418	3.0418	3.0418	3.0418	3.0418	3.0418	3.0418	3.0418	3.0418	3.0418	3.0418	3.0418	3.0418	3.0418	3.0418	3.0418	3.0418	3.0418	3.0418	3.0418	3.0418	3.0418	3.0418	3.0418	3.0418	3.0418	3.0418	3.0418	3.0418	3.40188	3.0418	3.0418	3.0418	3.0418	3.43477	3.0418	3.0418	3.0418	3.0418	3.0418	3.0418	3.0418	3.0418	3.0418	3.0418
1700017N19Rik	3.0418	3.47545	3.0418	3.0418	3.0418	3.0418	3.0418	3.0418	3.0418	3.0418	3.0418	3.0418	3.0418	3.0418	3.0418	3.31103	3.0418	3.0418	3.0418	3.0418	3.37344	3.0418	3.0418	3.0418	3.0418	3.0418	3.0418	3.0418	3.0418	3.0418	3.0418	3.0418	3.0418	3.0418	3.0418	3.0418	3.0418	3.0418	3.0418	3.88077	3.0418	3.0418	3.62738	3.0418	3.0418	3.0418	3.0418	3.0418	3.0418
1700018A04Rik	3.0418	3.0418	3.5089	3.0418	3.0418	3.0418	3.0418	3.0418	3.0418	3.0418	3.0418	3.0418	3.0418	3.0418	3.0418	3.0418	3.0418	3.0418	3.0418	3.0418	3.37344	3.0418	3.0418	3.0418	3.55311	3.0418	3.0418	3.0418	3.0418	3.0418	3.0418	3.0418	3.0418	3.0418	3.0418	3.0418	3.0418	3.0418	3.0418	3.0418	3.0418	3.0418	3.0418	3.0418	3.0418	3.0418	3.47172	3.0418	3.0418
1700018B08Rik	3.0418	3.0418	3.0418	3.0418	3.0418	3.0418	3.0418	3.0418	3.0418	3.34126	3.0418	3.37666	3.0418	3.0418	3.0418	3.42199	3.0418	3.32866	3.0418	3.0418	3.0418	3.48803	3.0418	3.0418	3.0418	3.0418	3.0418	3.41288	3.0418	3.0418	3.0418	3.45123	3.0418	3.40188	3.0418	3.0418	3.0418	3.0418	3.43477	3.88077	3.0418	3.53954	3.0418	3.0418	3.0418	3.0418	3.47172	3.0418	3.0418
1700018B24Rik	3.0418	3.0418	3.0418	3.48967	3.0418	3.0418	3.0418	3.0418	3.0418	3.0418	3.0418	3.0418	3.0418	3.0418	3.0418	3.0418	3.0418	3.0418	3.0418	3.0418	3.0418	3.0418	3.0418	3.0418	3.0418	3.0418	3.0418	3.30456	3.0418	3.0418	3.0418	3.0418	3.0418	3.0418	3.0418	3.0418	3.0418	3.0418	3.0418	3.0418	3.0418	3.0418	3.0418	3.0418	3.0418	3.0418	3.0418	3.0418	3.0418
1700018C11Rik	3.0418	3.0418	3.0418	3.0418	3.0418	3.0418	3.0418	3.0418	3.0418	3.0418	3.0418	3.0418	3.0418	3.0418	3.0418	3.0418	3.0418	3.0418	3.0418	3.0418	3.0418	3.0418	3.0418	3.0418	3.0418	3.0418	3.34794	3.0418	3.0418	3.0418	3.0418	3.0418	3.0418	3.0418	3.0418	3.47886	3.0418	3.0418	3.0418	3.0418	3.0418	3.0418	3.0418	3.0418	3.0418	3.0418	3.0418	3.0418	3.0418
1700018F24Rik	3.0418	3.0418	3.0418	3.0418	3.0418	3.0418	3.0418	3.0418	3.0418	3.0418	3.0418	3.0418	3.0418	3.0418	3.0418	3.0418	3.0418	3.0418	3.0418	3.0418	3.0418	3.0418	3.0418	3.0418	3.0418	3.0418	3.0418	3.0418	3.0418	3.0418	3.0418	3.0418	3.0418	3.0418	3.0418	3.0418	3.0418	3.0418	3.0418	3.53069	3.0418	3.0418	3.0418	3.0418	3.0418	3.0418	3.0418	3.0418	3.0418
1700018G05Rik	3.0418	3.0418	3.0418	3.0418	3.0418	3.0418	3.0418	3.0418	3.0418	3.0418	3.0418	3.0418	3.0418	3.0418	3.0418	3.0418	3.0418	3.0418	3.0418	3.0418	3.0418	3.0418	3.0418	3.0418	3.0418	3.0418	3.0418	3.0418	3.0418	3.0418	3.0418	3.0418	3.0418	3.0418	3.0418	3.0418	3.0418	3.0418	3.0418	3.0418	3.0418	3.0418	3.0418	3.0418	3.0418	3.0418	3.0418	3.0418	3.0418
1700018L02Rik	3.91013	3.89967	3.5089	4.02797	4.05501	3.81897	3.74903	3.0418	3.89271	3.87854	3.0418	3.85314	3.83903	3.62318	3.88511	4.15766	3.85353	3.84412	4.13797	3.62972	3.90809	3.6704	3.73895	3.69079	3.98642	3.60516	3.72133	3.82162	3.92661	4.61412	3.0418	4.02871	4.23421	3.98031	3.79057	3.0418	3.72407	3.54267	3.71833	4.30112	3.88559	4.13403	3.95855	4.16478	3.58233	3.59066	3.78108	4.33287	4.11901
1700019A02Rik	3.0418	3.47545	3.5089	3.48967	4.05501	3.81897	3.83058	4.28064	3.71809	3.63755	3.71101	3.9163	3.77107	3.85862	3.73356	3.96019	4.17556	3.53704	3.76908	3.62972	3.37344	3.58724	4.01857	3.87509	3.40429	3.83361	3.65069	3.56516	3.55793	3.53725	3.0418	3.85269	4.02426	3.75649	4.31189	4.00486	3.99809	3.54267	4.19352	4.00621	3.57998	4.13403	3.75658	3.0418	3.58233	3.59066	3.89244	3.84851	3.45704
1700019B03Rik	3.0418	3.0418	3.5089	3.0418	3.0418	3.39271	3.0418	3.0418	3.0418	3.34126	3.0418	3.0418	3.37071	3.0418	3.0418	3.0418	3.67382	3.44682	3.0418	3.0418	3.70079	3.48803	3.73895	3.41859	3.40429	3.44142	3.34794	3.30456	3.0418	3.53725	4.54259	3.0418	3.0418	3.40188	3.0418	3.0418	3.0418	3.74667	3.0418	3.0418	3.42345	3.53954	3.0418	3.0418	3.0418	3.0418	3.0418	3.0418	3.0418
1700019B21Rik	3.0418	3.0418	3.0418	3.0418	3.0418	3.0418	3.0418	3.0418	3.0418	3.0418	3.0418	3.0418	3.0418	3.0418	3.0418	3.0418	3.0418	3.0418	3.0418	3.0418	3.0418	3.0418	3.0418	3.0418	3.0418	3.0418	3.0418	3.0418	3.0418	3.0418	3.0418	3.0418	3.0418	3.0418	3.0418	3.0418	3.0418	3.0418	3.0418	3.0418	3.0418	3.0418	3.45728	3.0418	3.0418	3.0418	3.0418	3.0418	3.0418
1700019D03Rik	3.79656	4.08514	4.06899	3.92718	5.40514	5.41933	5.0486	4.97876	4.42037	4.45438	5.17977	5.5007	4.66722	4.66183	4.60248	4.64221	4.60861	4.12874	3.97436	3.62972	4.16461	3.86859	5.65584	5.52572	4.5556	4.91244	4.66285	4.80837	5.3739	5.13493	3.0418	5.42408	5.44932	5.41713	5.43493	5.60243	3.60058	5.73599	5.92717	5.68463	5.87752	6.10739	6.33925	5.46993	5.73356	5.55445	5.54525	5.70509	4.43091
1700019E08Rik	3.0418	3.0418	3.5089	3.0418	3.0418	3.0418	3.0418	3.0418	3.0418	3.0418	3.0418	3.0418	3.0418	3.0418	3.0418	3.0418	3.0418	3.0418	3.0418	3.0418	3.0418	3.0418	3.0418	3.0418	3.0418	3.0418	3.0418	3.0418	3.0418	3.0418	3.0418	3.0418	3.0418	3.0418	3.0418	3.0418	3.0418	3.0418	3.0418	3.0418	3.0418	3.0418	3.45728	3.0418	3.0418	3.0418	3.0418	3.0418	3.0418
1700019G17Rik	6.19355	6.66196	6.76851	6.79523	6.91455	6.984	6.84943	6.87055	6.65742	6.67213	6.8467	7.14634	7.0257	6.86044	6.72204	6.7952	6.63365	6.71426	6.78007	6.53444	7.33627	7.14429	6.72821	7.23334	6.78728	6.92444	6.55322	6.65803	6.35206	6.3808	6.7698	6.88333	7.30313	7.30709	7.3928	7.16171	6.62893	7.02511	6.93396	7.06993	6.74718	6.97522	7.64704	6.59345	6.57427	7.0285	7.16439	6.86182	6.78088
1700019G24Rik	3.0418	3.0418	3.0418	3.0418	3.0418	3.0418	3.0418	3.0418	3.0418	3.0418	3.0418	3.0418	3.0418	3.0418	3.0418	3.0418	3.0418	3.0418	3.0418	3.0418	3.0418	3.0418	3.0418	3.0418	3.0418	3.0418	3.0418	3.0418	3.0418	3.0418	3.0418	3.0418	3.0418	3.0418	3.0418	3.0418	3.0418	3.0418	3.0418	3.53069	3.0418	3.53954	3.45728	3.55409	3.0418	3.0418	3.0418	3.0418	3.0418
1700019L03Rik	5.14166	5.11937	5.323	5.36549	4.73428	5.04536	4.84542	4.82928	4.70202	4.97283	5.10176	5.09126	4.89044	4.8603	4.69574	4.89334	4.49602	4.77542	4.654	4.58798	4.73313	4.80429	4.73725	5.09859	5.05507	4.80948	4.79715	4.67805	4.53141	5.00027	4.32541	4.69307	4.68608	5.11362	4.57489	5.06544	5.24104	5.01908	5.00864	4.71722	4.95883	5.09982	4.75638	4.84833	4.77874	4.69583	4.80993	5.33396	4.58145
1700019M22Rik	3.0418	3.0418	3.0418	3.0418	3.0418	3.0418	3.0418	3.0418	3.0418	3.0418	3.0418	3.0418	3.0418	3.0418	3.0418	3.0418	3.0418	3.0418	3.0418	3.0418	3.0418	3.0418	3.0418	3.0418	3.0418	3.0418	3.0418	3.0418	3.0418	3.0418	3.0418	3.0418	3.0418	3.0418	3.0418	3.0418	3.0418	3.0418	3.0418	3.0418	3.0418	3.0418	3.0418	3.0418	3.0418	3.0418	3.0418	3.70328	3.0418
1700019N19Rik	3.0418	3.0418	3.5089	3.0418	3.0418	3.0418	3.0418	3.0418	3.0418	3.0418	3.71101	3.0418	3.0418	3.45428	3.39016	3.31103	3.0418	3.32866	3.0418	3.0418	3.0418	3.0418	3.0418	3.0418	3.0418	3.0418	3.0418	3.0418	3.0418	3.0418	3.0418	3.0418	3.0418	3.0418	3.0418	3.0418	3.0418	3.0418	3.0418	3.0418	3.0418	3.0418	3.0418	3.0418	3.0418	3.0418	3.47172	3.0418	3.45704
1700019O17Rik	3.0418	3.0418	3.0418	3.0418	3.0418	3.0418	3.0418	3.0418	3.0418	3.0418	3.0418	3.0418	3.0418	3.0418	3.0418	3.0418	3.0418	3.32866	3.0418	3.0418	3.0418	3.0418	3.0418	3.0418	3.0418	3.0418	3.0418	3.0418	3.0418	3.0418	3.0418	3.0418	3.0418	3.0418	3.0418	3.0418	3.0418	3.54267	3.0418	3.0418	3.0418	3.0418	3.0418	3.0418	3.0418	3.0418	3.0418	3.0418	3.45704
1700020A23Rik	3.0418	3.0418	3.5089	3.48967	3.40646	3.39271	3.54436	3.88141	3.78132	3.63755	3.71101	3.70711	3.50595	3.45428	3.39016	3.74806	3.55921	3.6791	3.63768	3.75942	3.90809	3.92401	3.0418	3.69079	3.66641	3.60516	3.65069	3.73136	3.76793	3.0418	3.0418	4.1045	3.5401	3.83887	3.0418	3.79319	3.60058	3.54267	4.06324	4.00621	3.69906	3.53954	3.0418	3.55409	3.88922	3.59066	3.47172	3.84851	3.62704
1700020D05Rik	4.55992	4.30674	4.06899	3.92718	3.99191	4.01804	4.37694	4.51237	4.07678	4.27655	3.0418	4.34	4.45833	4.57203	4.26399	4.62342	3.99741	3.84412	3.97436	3.75942	4.53342	4.2714	4.01857	4.30956	4.04918	4.43273	4.26906	4.16046	3.92661	4.61412	4.95361	4.91905	4.4834	5.04341	4.49409	4.55355	4.89887	4.0292	4.54904	4.77391	4.46571	4.90946	4.58227	5.19598	4.33032	4.65788	4.4767	4.71237	4.31747
1700020G17Rik	3.0418	3.0418	3.0418	3.0418	3.0418	3.0418	3.0418	3.0418	3.0418	3.0418	3.0418	3.0418	3.0418	3.0418	3.0418	3.0418	3.0418	3.0418	3.0418	3.0418	3.0418	3.0418	3.0418	3.0418	3.0418	3.0418	3.0418	3.0418	3.0418	3.0418	3.0418	3.0418	3.0418	3.0418	3.0418	3.0418	3.0418	3.0418	3.0418	3.0418	3.0418	3.0418	3.0418	3.0418	3.0418	3.0418	3.0418	3.0418	3.0418
1700020I14Rik	9.88982	9.79362	9.99129	9.98134	8.8705	8.96742	9.27852	9.27835	9.52405	9.44177	9.18682	8.98076	9.05468	9.40777	9.33323	9.55257	8.98949	9.01157	9.01463	8.93419	9.25866	9.24884	9.16037	9.11266	9.24787	9.1359	9.18235	9.15258	10.6472	9.96458	10.5605	9.79945	10.0703	9.89685	10.1439	9.97837	10.093	9.97726	10.1988	9.69838	9.62187	9.66065	9.83259	9.77617	9.85357	9.95293	9.82625	9.62213	9.41654
1700020L24Rik	3.66036	4.16488	3.5089	3.67269	3.92362	3.64666	4.1954	3.88141	3.98985	3.76892	3.71101	3.70711	3.60906	3.85862	4.06766	3.79578	3.7697	3.93604	3.63768	3.75942	4.07089	3.86859	3.73895	4.20494	3.98642	3.72963	3.72133	3.93875	3.76793	4.0188	4.63702	3.45123	3.5401	3.54972	3.57419	3.79319	3.72407	4.0292	3.0418	4.1153	4.27351	4.13403	4.37644	4.05106	4.33032	4.24162	3.0418	3.0418	3.62704
1700020M21Rik	3.0418	3.0418	3.0418	3.0418	3.0418	3.0418	3.0418	3.0418	3.0418	3.0418	3.0418	3.0418	3.0418	3.0418	3.0418	3.0418	3.0418	3.0418	3.0418	3.0418	3.0418	3.0418	3.0418	3.0418	3.0418	3.0418	3.0418	3.0418	3.0418	3.53725	3.0418	3.0418	3.0418	3.54972	3.0418	3.0418	3.0418	3.0418	3.0418	3.0418	3.0418	3.0418	3.0418	3.0418	3.0418	3.0418	3.0418	3.0418	3.0418
1700020N01Rik	3.48085	3.0418	3.5089	3.0418	3.0418	3.39271	3.0418	3.0418	3.0418	3.0418	3.0418	3.0418	3.0418	3.0418	3.0418	3.0418	3.40864	3.0418	3.0418	3.45895	3.0418	3.35796	3.0418	3.41859	3.40429	3.0418	3.34794	3.0418	3.0418	3.0418	3.0418	3.0418	3.0418	3.0418	3.0418	3.0418	3.0418	3.0418	3.0418	3.0418	3.42345	3.0418	3.45728	3.0418	3.0418	3.0418	3.0418	3.0418	3.0418
1700020N15Rik	3.0418	3.0418	3.0418	3.0418	3.0418	3.0418	3.0418	3.0418	3.0418	3.0418	3.0418	3.0418	3.0418	3.0418	3.0418	3.0418	3.0418	3.0418	3.0418	3.0418	3.0418	3.0418	3.0418	3.0418	3.0418	3.0418	3.0418	3.0418	3.0418	3.0418	3.0418	3.0418	3.0418	3.0418	3.0418	3.0418	3.0418	3.0418	3.0418	3.0418	3.0418	3.0418	3.0418	3.0418	3.0418	3.0418	3.0418	3.0418	3.0418
1700020N18Rik	3.66036	3.65281	3.0418	3.48967	3.55615	3.0418	3.54436	3.0418	3.0418	3.34126	3.0418	3.70711	3.37071	3.0418	3.0418	3.50677	3.85353	3.44682	3.87872	3.0418	3.0418	3.0418	3.0418	3.57317	3.0418	3.44142	3.34794	3.0418	3.0418	3.73911	3.0418	4.02871	3.89661	3.66229	3.0418	3.0418	3.0418	3.54267	3.43477	3.72997	3.42345	3.53954	3.0418	3.92015	3.58233	3.0418	3.78108	3.0418	3.0418
1700021F05Rik	8.12855	8.18669	8.07013	8.05867	6.64232	6.6581	6.73035	6.87941	6.6198	6.58859	6.80051	6.36625	6.58076	6.91845	6.68848	6.55428	6.64146	6.63535	6.73225	6.94701	6.177	5.99662	6.95139	6.56749	6.69513	6.73831	6.47016	6.7606	8.55597	7.75649	6.85947	7.78453	8.13521	7.67492	8.0662	7.95257	8.4025	7.89338	8.03748	8.07271	8.08973	7.8641	7.81088	7.87308	7.55489	7.64021	7.5299	7.75568	8.51
1700021F07Rik	3.0418	3.47545	3.0418	3.0418	3.0418	3.0418	3.0418	3.0418	3.0418	3.0418	3.0418	3.0418	3.0418	3.0418	3.0418	3.0418	3.0418	3.0418	3.0418	3.0418	3.0418	3.0418	3.0418	3.0418	3.40429	3.0418	3.0418	3.0418	3.0418	3.0418	3.0418	3.0418	3.0418	3.0418	3.0418	3.0418	3.0418	3.0418	3.0418	3.53069	3.0418	3.0418	3.0418	3.55409	3.0418	3.0418	3.0418	3.0418	3.0418
1700021K19Rik	10.0708	10.0467	9.90873	9.85989	10.5959	10.4269	10.2795	10.2752	10.4434	10.4869	10.3311	10.6112	10.6378	10.4092	10.6045	10.5239	10.3888	10.186	10.2972	10.2178	10.4923	10.5876	10.4346	10.5609	10.4521	10.5372	10.686	10.4353	9.70299	9.86035	8.16843	9.98485	9.80975	9.91777	9.76567	9.83895	9.65524	9.75589	9.40618	9.73924	9.90264	9.74296	9.776	9.65746	9.63859	9.74351	9.82039	9.77212	9.46082
1700021N21Rik	3.0418	3.0418	3.0418	3.0418	3.0418	3.0418	3.0418	3.0418	3.0418	3.0418	3.0418	3.0418	3.0418	3.0418	3.0418	3.0418	3.0418	3.0418	3.0418	3.0418	3.0418	3.0418	3.0418	3.0418	3.0418	3.0418	3.0418	3.0418	3.0418	3.0418	3.0418	3.0418	3.0418	3.0418	3.0418	3.0418	3.0418	3.0418	3.0418	3.0418	3.0418	3.0418	3.0418	3.0418	3.0418	3.0418	3.0418	3.0418	3.45704
1700022A21Rik	3.0418	3.0418	3.0418	3.0418	3.0418	3.0418	3.0418	3.0418	3.0418	3.0418	3.0418	3.0418	3.0418	3.0418	3.0418	3.0418	3.0418	3.0418	3.0418	3.0418	3.0418	3.0418	3.0418	3.0418	3.0418	3.0418	3.0418	3.0418	3.0418	3.0418	3.0418	3.0418	3.0418	3.0418	3.0418	3.0418	3.0418	3.0418	3.0418	3.53069	3.0418	3.0418	3.0418	3.0418	3.0418	3.0418	3.0418	3.0418	3.0418
1700022A22Rik	3.0418	3.0418	3.0418	3.0418	3.0418	3.0418	3.0418	3.0418	3.0418	3.0418	3.0418	3.0418	3.0418	3.0418	3.0418	3.0418	3.0418	3.0418	3.0418	3.0418	3.0418	3.0418	3.0418	3.0418	3.0418	3.0418	3.0418	3.0418	3.0418	3.0418	3.0418	3.0418	3.0418	3.0418	3.0418	3.0418	3.0418	3.0418	3.0418	3.0418	3.0418	3.0418	3.0418	3.0418	3.0418	3.43106	3.0418	3.0418	3.0418
1700022E09Rik	3.0418	3.0418	3.0418	3.0418	3.0418	3.0418	3.0418	3.0418	3.0418	3.0418	3.0418	3.0418	3.0418	3.0418	3.0418	3.0418	3.0418	3.0418	3.0418	3.0418	3.0418	3.0418	3.0418	3.0418	3.0418	3.0418	3.0418	3.0418	3.0418	3.0418	3.0418	3.0418	3.0418	3.0418	3.0418	3.0418	3.0418	3.0418	3.0418	3.0418	3.0418	3.0418	3.0418	3.0418	3.0418	3.0418	3.0418	3.0418	3.0418
1700022H16Rik	3.0418	3.0418	3.0418	3.0418	3.40646	3.0418	3.0418	3.0418	3.0418	3.0418	3.0418	3.0418	3.0418	3.0418	3.0418	3.0418	3.0418	3.0418	3.0418	3.0418	3.0418	3.0418	3.0418	3.0418	3.0418	3.0418	3.0418	3.0418	3.0418	3.0418	3.0418	3.0418	3.0418	3.0418	3.0418	3.0418	3.0418	3.0418	3.0418	3.0418	3.0418	3.0418	3.0418	3.0418	3.0418	3.0418	3.0418	3.0418	3.0418
1700022I11Rik	3.91013	3.78741	4.06899	4.02797	3.67012	3.95709	3.83058	3.88141	3.64778	3.70672	3.71101	3.61924	3.83903	3.45428	3.39016	3.69659	3.7697	3.73882	3.76908	3.86768	3.8455	3.74323	3.53713	3.41859	3.9185	3.0418	3.57008	3.41288	3.55793	3.0418	4.04864	3.85269	3.74308	3.66229	3.95391	3.65758	3.91734	3.74667	4.06324	4.1153	3.69906	3.7423	3.0418	3.55409	3.42512	3.0418	4.07645	3.84851	3.62704
1700023C21Rik	3.0418	3.0418	3.0418	3.0418	3.0418	3.0418	3.0418	3.0418	3.0418	3.0418	3.0418	3.0418	3.0418	3.0418	3.0418	3.0418	3.0418	3.32866	3.0418	3.0418	3.0418	3.0418	3.0418	3.0418	3.0418	3.0418	3.0418	3.0418	3.0418	3.0418	3.0418	3.0418	3.0418	3.0418	3.0418	3.0418	3.0418	3.0418	3.0418	3.88077	3.42345	3.0418	3.62738	3.0418	3.0418	3.0418	3.0418	3.0418	3.0418
1700023E05Rik	3.0418	3.0418	3.5089	3.0418	3.0418	3.0418	3.39806	3.0418	3.0418	3.34126	3.0418	3.0418	3.37071	3.0418	3.0418	3.0418	3.0418	3.0418	3.0418	3.0418	3.37344	3.0418	3.0418	3.0418	3.40429	3.0418	3.57008	3.41288	3.0418	3.0418	3.0418	3.0418	3.0418	3.0418	3.0418	3.0418	3.0418	3.0418	3.43477	3.0418	3.0418	3.0418	3.45728	3.0418	3.0418	3.0418	3.47172	3.0418	3.45704
1700023F02Rik	3.0418	3.0418	3.0418	3.0418	3.0418	3.0418	3.0418	3.0418	3.0418	3.0418	3.0418	3.0418	3.0418	3.0418	3.0418	3.0418	3.0418	3.0418	3.0418	3.0418	3.0418	3.0418	3.0418	3.0418	3.0418	3.0418	3.0418	3.0418	3.0418	3.0418	3.0418	3.0418	3.0418	3.0418	3.0418	3.0418	3.0418	3.0418	3.0418	3.0418	3.0418	3.0418	3.0418	3.0418	3.0418	3.0418	3.0418	3.0418	3.0418
1700023F06Rik	3.91013	3.89967	3.844	3.81149	3.84881	3.89115	4.09008	4.06321	3.64778	3.70672	3.71101	3.9163	3.95861	3.7515	3.64229	3.88245	3.40864	3.73882	3.46464	3.86768	3.70079	4.23447	3.89162	3.57317	3.66641	3.60516	3.84295	3.41288	3.55793	3.73911	3.86928	4.02871	3.5401	3.75649	4.08947	3.0418	3.82725	3.0418	3.59585	3.88077	3.69906	4.40529	3.86444	3.92015	3.0418	4.12082	3.98954	3.51157	3.45704
1700023L04Rik	3.79656	3.65281	3.0418	3.81149	3.0418	3.0418	3.0418	3.0418	3.64778	3.46455	3.0418	3.37666	3.37071	3.0418	3.0418	3.42199	3.0418	3.0418	3.0418	3.0418	3.90809	3.58724	3.0418	3.0418	3.0418	3.44142	3.72133	3.41288	3.76793	3.89182	3.63087	3.0418	3.0418	3.40188	3.57419	3.79319	3.72407	3.74667	3.82067	3.53069	3.69906	3.7423	3.62738	3.55409	3.96754	3.81346	3.0418	3.0418	3.45704
1700024B18Rik	3.0418	3.0418	3.0418	3.0418	3.0418	3.0418	3.0418	3.0418	3.0418	3.0418	3.0418	3.0418	3.0418	3.0418	3.0418	3.0418	3.0418	3.0418	3.0418	3.0418	3.0418	3.0418	3.0418	3.0418	3.0418	3.0418	3.0418	3.0418	3.0418	3.0418	3.0418	3.0418	3.0418	3.0418	3.0418	3.0418	3.0418	3.0418	3.0418	3.0418	3.0418	3.0418	3.0418	3.0418	3.0418	3.0418	3.0418	3.0418	3.0418
1700024F13Rik	3.0418	3.0418	3.0418	3.0418	3.0418	3.0418	3.0418	3.0418	3.0418	3.0418	3.0418	3.0418	3.0418	3.0418	3.0418	3.0418	3.0418	3.0418	3.0418	3.0418	3.0418	3.0418	3.0418	3.0418	3.0418	3.0418	3.0418	3.0418	3.55793	3.89182	3.0418	3.61891	3.89661	3.66229	3.95391	3.65758	4.07172	3.74667	3.43477	3.0418	3.0418	3.0418	3.0418	3.0418	3.0418	3.0418	3.47172	3.70328	3.0418
1700024G13Rik	3.0418	3.0418	3.0418	3.0418	3.0418	3.0418	3.0418	3.0418	3.0418	3.0418	3.0418	3.0418	3.0418	3.0418	3.0418	3.0418	3.0418	3.0418	3.0418	3.0418	3.0418	3.0418	3.0418	3.0418	3.0418	3.0418	3.0418	3.0418	3.0418	3.0418	3.0418	3.0418	3.0418	3.0418	3.0418	3.0418	3.0418	3.0418	3.0418	3.0418	3.0418	3.0418	3.45728	3.0418	3.0418	3.0418	3.0418	3.0418	3.0418
1700024P04Rik	3.0418	3.0418	3.0418	3.0418	3.0418	3.0418	3.0418	3.0418	3.0418	3.0418	3.0418	3.0418	3.0418	3.0418	3.39016	3.0418	3.0418	3.0418	3.0418	3.0418	3.0418	3.0418	3.0418	3.0418	3.40429	3.0418	3.0418	3.30456	3.0418	3.0418	3.0418	3.0418	3.0418	3.0418	3.0418	3.0418	3.0418	3.54267	3.0418	3.0418	3.0418	3.0418	3.0418	3.55409	3.0418	3.0418	3.47172	3.0418	3.0418
1700024P16Rik	3.0418	3.0418	3.0418	3.0418	3.0418	3.0418	3.0418	3.0418	3.0418	3.0418	3.0418	3.0418	3.0418	3.0418	3.0418	3.0418	3.0418	3.0418	3.0418	3.0418	3.0418	3.0418	3.0418	3.0418	3.0418	3.0418	3.0418	3.30456	3.0418	3.0418	3.0418	3.0418	3.0418	3.40188	3.0418	3.0418	3.43815	3.0418	3.0418	3.0418	3.0418	3.0418	3.0418	3.0418	3.0418	3.0418	3.64758	3.0418	3.62704
1700025B11Rik	3.0418	3.0418	3.0418	3.0418	3.0418	3.0418	3.0418	3.0418	3.0418	3.0418	3.0418	3.0418	3.0418	3.0418	3.0418	3.0418	3.0418	3.0418	3.0418	3.0418	3.0418	3.0418	3.0418	3.0418	3.0418	3.0418	3.0418	3.0418	3.0418	3.0418	3.0418	3.0418	3.0418	3.0418	3.0418	3.0418	3.0418	3.0418	3.0418	3.0418	3.0418	3.0418	3.0418	3.0418	3.0418	3.0418	3.0418	3.0418	3.0418
1700025C18Rik	3.0418	3.0418	3.0418	3.0418	3.0418	3.0418	3.0418	3.0418	3.0418	3.0418	3.0418	3.0418	3.0418	3.0418	3.0418	3.31103	3.0418	3.0418	3.0418	3.0418	3.0418	3.0418	3.0418	3.0418	3.0418	3.0418	3.0418	3.0418	3.0418	3.0418	3.0418	3.0418	3.0418	3.0418	3.0418	3.0418	3.0418	3.0418	3.0418	3.0418	3.0418	3.0418	3.0418	3.0418	3.0418	3.0418	3.0418	3.0418	3.0418
1700025F22Rik	3.0418	3.0418	3.0418	3.0418	3.0418	3.0418	3.0418	3.0418	3.0418	3.0418	3.0418	3.0418	3.0418	3.0418	3.0418	3.0418	3.0418	3.0418	3.0418	3.45895	3.0418	3.35796	3.0418	3.0418	3.0418	3.0418	3.0418	3.30456	3.0418	3.0418	3.0418	3.0418	3.0418	3.40188	3.0418	3.0418	3.0418	3.0418	3.0418	3.0418	3.0418	3.0418	3.45728	3.0418	3.0418	3.0418	3.0418	3.0418	3.0418
1700025F24Rik	3.0418	3.0418	3.69955	3.0418	3.0418	3.0418	3.0418	3.0418	3.0418	3.0418	3.0418	3.0418	3.0418	3.0418	3.0418	3.0418	3.0418	3.0418	3.0418	3.0418	3.0418	3.0418	3.0418	3.0418	3.0418	3.0418	3.0418	3.0418	3.0418	3.0418	3.0418	3.0418	3.0418	3.40188	3.57419	3.0418	3.43815	3.0418	3.0418	3.0418	3.0418	3.0418	3.0418	3.0418	3.0418	3.0418	3.47172	3.0418	3.0418
1700025G04Rik	9.83987	9.73644	9.40182	9.15069	8.14103	8.2486	7.92672	8.16298	8.81074	8.86879	8.3511	8.20999	7.50807	7.49821	8.70809	8.8377	8.23888	8.14854	8.1648	8.18726	9.17602	9.03504	8.25477	8.22802	7.44224	7.26096	8.66665	8.7507	9.36123	8.9223	9.26439	8.76921	8.77482	8.83181	8.65493	8.41884	9.3119	8.60833	8.3328	8.658	8.44947	9.08486	8.7307	9.01658	8.80136	8.85384	8.48428	8.63882	8.53428
1700025K24Rik	3.0418	3.0418	3.0418	3.0418	3.0418	3.0418	3.0418	3.0418	3.0418	3.0418	3.0418	3.0418	3.0418	3.0418	3.0418	3.0418	3.0418	3.0418	3.0418	3.0418	3.0418	3.0418	3.0418	3.0418	3.0418	3.0418	3.0418	3.0418	3.0418	3.0418	3.0418	3.0418	3.0418	3.0418	3.0418	3.0418	3.0418	3.0418	3.0418	3.0418	3.0418	3.0418	3.0418	3.0418	3.0418	3.0418	3.0418	3.0418	3.0418
1700025M24Rik	3.0418	3.47545	3.0418	3.0418	3.0418	3.0418	3.0418	3.0418	3.0418	3.0418	3.0418	3.0418	3.0418	3.0418	3.0418	3.0418	3.0418	3.0418	3.0418	3.0418	3.0418	3.35796	3.0418	3.0418	3.0418	3.0418	3.0418	3.30456	3.0418	3.0418	3.0418	3.0418	3.0418	3.0418	3.0418	3.0418	3.0418	3.0418	3.0418	3.0418	3.0418	3.0418	3.0418	3.0418	3.0418	3.0418	3.0418	3.0418	3.0418
1700025N23Rik	3.0418	3.0418	3.0418	3.0418	3.0418	3.0418	3.0418	3.0418	3.0418	3.0418	3.0418	3.0418	3.0418	3.0418	3.0418	3.0418	3.0418	3.0418	3.0418	3.0418	3.0418	3.0418	3.0418	3.0418	3.0418	3.0418	3.0418	3.0418	3.0418	3.0418	3.86928	3.0418	3.0418	3.40188	3.0418	3.0418	3.0418	3.0418	3.0418	3.0418	3.0418	3.0418	3.0418	3.0418	3.0418	3.0418	3.47172	3.0418	3.0418
1700026D08Rik	3.0418	3.0418	3.0418	3.48967	3.0418	3.0418	3.0418	3.0418	3.0418	3.0418	3.0418	3.0418	3.0418	3.45428	3.0418	3.0418	3.0418	3.32866	3.0418	3.0418	3.37344	3.0418	3.0418	3.0418	3.0418	3.44142	3.0418	3.0418	3.0418	3.0418	3.0418	3.0418	3.0418	3.0418	3.0418	3.0418	3.0418	3.0418	3.0418	3.0418	3.42345	3.0418	3.62738	3.0418	3.42512	3.0418	3.0418	3.0418	3.0418
1700026D11Rik	3.0418	3.0418	3.0418	3.0418	3.0418	3.0418	3.0418	3.0418	3.47186	3.0418	3.0418	3.0418	3.0418	3.0418	3.0418	3.0418	3.0418	3.0418	3.0418	3.0418	3.0418	3.0418	3.0418	3.0418	3.0418	3.0418	3.0418	3.0418	3.0418	3.0418	3.86928	3.85269	3.5401	3.0418	3.57419	3.47886	3.43815	3.0418	3.0418	3.0418	3.42345	3.0418	3.0418	3.0418	3.0418	3.0418	3.0418	3.0418	3.0418
1700026F02Rik	3.0418	3.0418	3.0418	3.0418	3.0418	3.0418	3.0418	3.0418	3.0418	3.0418	3.0418	3.0418	3.0418	3.0418	3.0418	3.0418	3.0418	3.0418	3.0418	3.0418	3.0418	3.0418	3.0418	3.0418	3.0418	3.0418	3.0418	3.0418	3.0418	3.0418	3.0418	3.0418	3.0418	3.0418	3.0418	3.0418	3.0418	3.0418	3.0418	3.0418	3.0418	3.0418	3.0418	3.0418	3.0418	3.0418	3.0418	3.0418	3.0418
1700026L06Rik	3.0418	3.65281	3.0418	3.48967	3.40646	3.39271	3.39806	3.88141	3.34646	3.46455	3.71101	3.0418	3.0418	3.85862	3.39016	3.0418	3.40864	3.73882	3.0418	3.0418	3.37344	3.0418	3.0418	3.57317	3.0418	3.0418	3.0418	3.0418	3.0418	3.53725	3.0418	3.61891	3.5401	3.66229	3.57419	3.79319	3.0418	3.0418	3.43477	3.53069	3.69906	3.53954	3.75658	3.0418	3.0418	3.0418	3.64758	3.0418	3.0418
1700027A15Rik	3.0418	3.0418	3.0418	3.0418	3.0418	3.0418	3.0418	3.0418	3.0418	3.0418	3.0418	3.0418	3.0418	3.0418	3.0418	3.0418	3.0418	3.0418	3.0418	3.0418	3.0418	3.0418	3.0418	3.0418	3.0418	3.0418	3.0418	3.0418	3.0418	3.0418	3.0418	3.0418	3.0418	3.0418	3.0418	3.0418	3.0418	3.0418	3.0418	3.0418	3.0418	3.0418	3.0418	3.0418	3.0418	3.0418	3.0418	3.0418	3.0418
1700027F09Rik	3.0418	3.0418	3.0418	3.0418	3.0418	3.0418	3.0418	3.0418	3.0418	3.0418	3.0418	3.0418	3.0418	3.0418	3.0418	3.0418	3.0418	3.0418	3.0418	3.0418	3.0418	3.0418	3.0418	3.0418	3.0418	3.0418	3.0418	3.0418	3.0418	3.0418	3.63087	3.0418	3.0418	3.0418	3.0418	3.0418	3.0418	3.0418	3.0418	3.53069	3.0418	3.0418	3.0418	3.0418	3.0418	3.0418	3.0418	3.0418	3.0418
1700027H10Rik	3.0418	3.0418	3.0418	3.0418	3.0418	3.0418	3.0418	3.0418	3.0418	3.0418	3.0418	3.0418	3.0418	3.0418	3.0418	3.0418	3.0418	3.32866	3.46464	3.0418	3.0418	3.35796	3.0418	3.0418	3.0418	3.0418	3.0418	3.0418	3.0418	3.0418	3.0418	3.0418	3.0418	3.0418	3.0418	3.0418	3.0418	3.0418	3.0418	3.53069	3.0418	3.0418	3.0418	3.0418	3.0418	3.0418	3.0418	3.0418	3.0418
1700027I24Rik	3.0418	3.0418	3.5089	3.0418	3.0418	3.0418	3.0418	3.0418	3.0418	3.0418	3.0418	3.51431	3.0418	3.0418	3.0418	3.0418	3.0418	3.0418	3.0418	3.0418	3.0418	3.0418	3.0418	3.0418	3.0418	3.0418	3.0418	3.0418	3.0418	3.0418	3.0418	3.45123	3.0418	3.0418	3.0418	3.47886	3.0418	3.54267	3.59585	3.0418	3.0418	3.0418	3.0418	3.0418	3.0418	3.0418	3.0418	3.0418	3.0418
1700027J07Rik	3.0418	3.0418	3.0418	3.0418	3.0418	3.0418	3.0418	3.0418	3.0418	3.0418	3.0418	3.0418	3.0418	3.0418	3.0418	3.0418	3.0418	3.0418	3.0418	3.0418	3.0418	3.0418	3.0418	3.0418	3.0418	3.0418	3.0418	3.0418	3.0418	3.0418	3.63087	3.0418	3.0418	3.40188	3.57419	3.0418	4.07172	3.0418	3.0418	3.0418	3.0418	3.0418	3.0418	3.0418	3.0418	3.0418	3.0418	3.0418	3.45704
1700028B04Rik	3.0418	3.0418	3.0418	3.67269	3.0418	3.0418	3.0418	3.0418	3.0418	3.0418	3.0418	3.0418	3.0418	3.0418	3.0418	3.42199	3.0418	3.0418	3.0418	3.45895	3.0418	3.0418	3.53713	3.0418	3.0418	3.0418	3.0418	3.0418	3.55793	3.0418	3.0418	3.45123	3.0418	3.0418	3.0418	3.47886	3.0418	3.54267	3.43477	4.00621	3.57998	3.0418	3.0418	3.55409	3.0418	3.0418	3.64758	3.51157	3.0418
1700028D13Rik	3.0418	3.0418	3.0418	3.0418	3.0418	3.0418	3.0418	3.0418	3.0418	3.0418	3.0418	3.0418	3.0418	3.0418	3.0418	3.0418	3.0418	3.0418	3.0418	3.0418	3.0418	3.0418	3.0418	3.0418	3.0418	3.0418	3.0418	3.0418	3.0418	3.0418	3.0418	3.0418	3.0418	3.0418	3.0418	3.0418	3.0418	3.0418	3.0418	3.0418	3.0418	3.0418	3.0418	3.0418	3.0418	3.0418	3.47172	3.0418	3.0418
1700028E10Rik	4.00912	4.23838	4.16255	4.41172	4.22133	4.2268	4.457	4.65883	4.36041	4.583	3.98009	4.08052	4.31825	4.42228	4.53582	4.5245	4.49602	4.28771	4.55873	4.48958	4.99198	5.06633	4.01857	4.49148	4.39883	4.07992	4.42662	4.3156	4.27493	4.4757	5.02149	4.30057	3.89661	3.75649	4.2071	4.44138	4.60371	4.33038	4.45902	4.52855	4.5088	4.32274	4.67256	3.76258	4.16646	4.05393	4.4767	4.53868	4.1898
1700028I16Rik	3.91013	3.0418	3.0418	3.0418	3.40646	3.39271	3.54436	3.0418	3.0418	3.0418	3.0418	3.51431	3.0418	3.0418	3.39016	3.0418	3.40864	3.0418	3.46464	3.0418	3.0418	3.0418	3.0418	3.69079	3.40429	3.0418	3.34794	3.0418	3.92661	3.73911	3.0418	4.02871	3.74308	3.75649	3.79057	3.65758	3.72407	3.74667	3.43477	3.72997	3.88559	3.53954	4.04282	3.0418	3.70192	3.90206	3.64758	3.51157	3.45704
1700028J19Rik	4.55992	4.16488	4.64891	4.64114	4.11386	4.2268	4.60147	4.56332	4.44912	4.30839	4.18146	4.26094	4.31825	4.36738	4.17093	4.43853	3.99741	4.22722	4.2768	4.84116	4.24981	4.02447	3.89162	4.49148	4.21464	4.38184	4.08162	4.1881	4.27493	4.39939	4.72433	4.7338	4.4834	4.74602	4.72115	4.74932	4.93118	4.75445	4.63239	4.30112	4.8051	4.62081	4.11961	4.66313	4.33032	4.18314	4.4767	4.33287	5.07431
1700028K03Rik	4.66226	4.3708	4.46671	4.41172	5.04105	5.43636	5.51657	5.44635	4.90998	4.97283	5.32305	5.36157	5.52188	5.55088	5.05516	5.36766	5.31945	5.24307	5.00786	5.17327	4.94877	5.314	5.40317	5.52572	5.50097	5.54893	4.97426	5.10855	4.7396	4.8495	5.97089	5.11013	5.0568	5.01912	5.17572	4.9936	5.1368	4.8672	5.32121	5.02352	4.89961	4.90946	4.9778	4.66313	5.22756	5.2076	4.96551	5.15837	4.90737
1700028M03Rik	3.0418	3.0418	3.0418	3.0418	3.0418	3.0418	3.0418	3.0418	3.0418	3.0418	3.0418	3.0418	3.0418	3.0418	3.0418	3.0418	3.0418	3.0418	3.0418	3.0418	3.0418	3.0418	3.0418	3.0418	3.0418	3.0418	3.0418	3.0418	3.0418	3.0418	3.0418	3.0418	3.0418	3.0418	3.0418	3.0418	3.0418	3.0418	3.0418	3.0418	3.0418	3.0418	3.45728	3.0418	3.0418	3.0418	3.0418	3.0418	3.0418
1700028P14Rik	3.0418	3.0418	3.0418	3.0418	3.0418	3.0418	3.0418	3.0418	3.0418	3.0418	3.0418	3.37666	3.0418	3.45428	3.53327	3.0418	3.0418	3.0418	3.0418	3.0418	3.0418	3.0418	3.0418	3.0418	3.0418	3.0418	3.0418	3.0418	3.0418	3.0418	3.0418	3.0418	3.0418	3.40188	3.0418	3.0418	3.0418	3.0418	3.0418	3.0418	3.42345	3.0418	3.0418	3.0418	3.42512	3.0418	3.0418	3.0418	3.0418
1700028P15Rik	3.0418	3.0418	3.0418	3.0418	3.0418	3.0418	3.0418	3.0418	3.0418	3.0418	3.0418	3.0418	3.0418	3.0418	3.0418	3.0418	3.0418	3.0418	3.0418	3.0418	3.0418	3.0418	3.0418	3.0418	3.0418	3.0418	3.0418	3.0418	3.0418	3.0418	3.0418	3.0418	3.0418	3.0418	3.0418	3.0418	3.0418	3.0418	3.0418	3.0418	3.0418	3.0418	3.0418	3.0418	3.0418	3.0418	3.0418	3.0418	3.0418
1700029B22Rik	3.0418	3.0418	3.0418	3.0418	3.0418	3.0418	3.0418	3.0418	3.0418	3.0418	3.0418	3.0418	3.0418	3.0418	3.0418	3.0418	3.0418	3.0418	3.0418	3.0418	3.0418	3.0418	3.0418	3.0418	3.0418	3.0418	3.0418	3.0418	3.0418	3.0418	3.0418	3.0418	3.0418	3.0418	3.0418	3.0418	3.0418	3.0418	3.0418	3.0418	3.0418	3.0418	3.0418	3.0418	3.0418	3.0418	3.0418	3.0418	3.0418
1700029F12Rik	3.0418	3.0418	3.0418	3.0418	3.0418	3.0418	3.0418	3.0418	3.0418	3.0418	3.0418	3.0418	3.0418	3.0418	3.0418	3.0418	3.0418	3.0418	3.0418	3.0418	3.0418	3.0418	3.0418	3.0418	3.0418	3.0418	3.34794	3.0418	3.0418	3.0418	3.0418	3.0418	3.0418	3.0418	3.0418	3.0418	3.0418	3.0418	3.0418	3.0418	3.0418	3.0418	3.0418	3.0418	3.0418	3.43106	3.0418	3.0418	3.0418
1700029H14Rik	3.0418	3.0418	3.0418	3.0418	3.0418	3.73856	3.0418	3.0418	3.47186	3.46455	3.0418	3.51431	3.37071	3.0418	3.73356	3.50677	3.0418	3.44682	3.0418	3.62972	3.70079	3.74323	3.0418	3.41859	3.0418	3.0418	3.65069	3.30456	3.76793	3.0418	4.80564	3.45123	3.89661	3.0418	3.0418	3.47886	3.0418	3.0418	3.43477	3.53069	3.0418	3.53954	3.62738	3.55409	3.0418	3.0418	4.07645	3.0418	3.0418
1700029I15Rik	4.25257	3.99755	4.24762	4.20014	3.92362	4.17885	4.09008	4.45898	4.26343	4.36924	4.34725	4.17503	4.24037	3.85862	4.21858	4.32038	4.06085	4.16272	3.87872	4.04673	4.28978	4.02447	4.31686	4.30956	4.1627	4.14837	4.12223	4.07222	3.0418	3.53725	4.19703	3.74631	3.89661	4.04269	3.95391	4.24734	3.60058	4.33038	3.82067	4.21267	4.16174	3.89567	4.19043	3.92015	4.27865	3.98149	4.07645	3.96943	4.04227
1700029J03Rik	3.0418	3.0418	3.0418	3.0418	3.0418	3.0418	3.0418	3.0418	3.0418	3.0418	3.0418	3.0418	3.0418	3.0418	3.0418	3.0418	3.0418	3.0418	3.0418	3.0418	3.0418	3.0418	3.0418	3.0418	3.0418	3.0418	3.0418	3.0418	3.0418	3.0418	3.0418	3.0418	3.0418	3.0418	3.0418	3.0418	3.0418	3.0418	3.0418	3.0418	3.0418	3.0418	3.0418	3.0418	3.0418	3.0418	3.0418	3.0418	3.45704
1700029J07Rik	4.66226	4.54264	4.98871	5.10876	5.2463	5.3846	5.24407	5.26192	5.10448	4.91899	5.32305	5.16899	5.3109	5.31637	4.98642	4.84712	5.02635	5.3068	4.93756	5.01808	5.15146	5.01053	4.95161	5.35029	5.31669	4.84477	4.75404	4.62522	5.51998	5.29511	5.31564	4.91905	5.18737	4.94332	4.96895	5.53072	5.96095	5.11105	5.61165	5.65686	5.35391	5.14328	5.47635	5.69738	5.54207	5.55445	5.76198	5.48898	5.74618
1700029M20Rik	3.48085	3.0418	3.0418	3.48967	3.0418	3.0418	3.0418	3.0418	3.0418	3.0418	3.0418	3.0418	3.0418	3.0418	3.0418	3.0418	3.0418	3.32866	3.46464	3.0418	3.0418	3.35796	3.0418	3.0418	3.0418	3.0418	3.0418	3.0418	3.0418	3.0418	3.0418	3.0418	3.0418	3.0418	3.0418	3.0418	3.0418	3.0418	3.0418	3.53069	3.0418	3.53954	3.0418	3.55409	3.0418	3.0418	3.0418	3.0418	3.0418
1700029N11Rik	3.0418	3.0418	3.0418	3.0418	3.40646	3.0418	3.0418	3.0418	3.0418	3.0418	3.0418	3.0418	3.0418	3.0418	3.0418	3.31103	3.0418	3.32866	3.0418	3.45895	3.0418	3.0418	3.0418	3.41859	3.0418	3.0418	3.34794	3.30456	3.0418	3.0418	3.0418	3.0418	3.0418	3.0418	3.0418	3.0418	3.0418	3.0418	3.0418	3.0418	3.42345	3.0418	3.45728	3.0418	3.0418	3.0418	3.0418	3.51157	3.0418
1700029P11Rik	3.0418	3.0418	3.0418	3.0418	3.0418	3.0418	3.0418	3.0418	3.0418	3.0418	3.0418	3.0418	3.0418	3.0418	3.0418	3.0418	3.0418	3.0418	3.0418	3.0418	3.0418	3.0418	3.0418	3.0418	3.0418	3.0418	3.0418	3.0418	3.0418	3.0418	3.0418	3.45123	3.0418	3.54972	3.0418	3.47886	3.0418	3.0418	3.0418	3.0418	3.0418	3.0418	3.0418	3.0418	3.0418	3.0418	3.0418	3.0418	3.0418
1700030A11Rik	3.0418	3.0418	3.0418	3.0418	3.0418	3.0418	3.0418	3.0418	3.0418	3.46455	3.0418	3.0418	3.0418	3.0418	3.0418	3.42199	3.0418	3.61273	3.0418	3.0418	3.50979	3.48803	3.0418	3.0418	3.0418	3.0418	3.0418	3.0418	3.0418	3.0418	3.0418	3.0418	3.0418	3.0418	3.0418	3.0418	3.0418	3.0418	3.0418	3.53069	3.0418	3.7423	3.0418	3.0418	3.0418	3.0418	3.0418	3.0418	3.0418
1700030C10Rik	3.91013	4.08514	3.844	4.11812	3.92362	4.27249	4.14424	3.77143	4.2968	3.82584	3.0418	4.02925	3.90114	3.9521	3.9506	3.9964	3.85353	4.01839	3.76908	3.86768	4.11895	4.02447	3.73895	4.02253	3.98642	3.83361	3.89674	4.04077	4.05841	3.73911	3.86928	3.0418	3.0418	3.0418	3.0418	3.0418	3.91734	3.54267	4.13069	4.21267	3.69906	3.89567	3.0418	3.55409	3.70192	3.59066	4.22854	3.51157	3.75618
1700030F04Rik	3.0418	3.0418	3.0418	3.0418	3.0418	3.0418	3.0418	3.0418	3.0418	3.0418	3.0418	3.0418	3.0418	3.0418	3.0418	3.0418	3.0418	3.0418	3.0418	3.0418	3.0418	3.0418	3.0418	3.0418	3.0418	3.0418	3.0418	3.0418	3.0418	3.0418	3.0418	3.0418	3.0418	3.0418	3.0418	3.0418	3.0418	3.0418	3.0418	3.0418	3.0418	3.0418	3.45728	3.0418	3.0418	3.0418	3.0418	3.0418	3.0418
1700030F18Rik	3.0418	3.0418	3.0418	3.0418	3.0418	3.0418	3.0418	3.0418	3.0418	3.0418	3.0418	3.0418	3.0418	3.45428	3.0418	3.0418	3.0418	3.0418	3.0418	3.0418	3.37344	3.0418	3.0418	3.0418	3.0418	3.44142	3.0418	3.0418	3.0418	3.0418	3.0418	3.0418	3.0418	3.0418	3.0418	3.0418	3.0418	3.0418	3.0418	3.0418	3.0418	3.0418	3.0418	3.0418	3.0418	3.0418	3.47172	3.0418	3.0418
1700030J22Rik	5.53994	5.46506	5.5347	5.42257	4.93807	4.87464	5.0486	5.01349	4.6791	4.65369	5.25336	5.58607	5.37465	5.36667	4.78215	4.92323	4.32526	4.25792	4.39865	4.43689	4.24981	4.2714	5.43746	5.48867	5.63217	5.60828	5.01042	4.91192	4.91669	5.25686	3.63087	5.30221	5.41491	5.48758	5.74883	5.60243	5.64799	5.64994	5.81914	5.50886	5.89195	5.57648	5.25064	5.8924	5.46516	5.59213	5.9492	5.95571	4.37572
1700030K09Rik	7.82507	7.82546	8.16519	7.92243	8.74801	8.75815	8.49187	8.59651	8.18957	8.23759	8.28585	8.52494	8.4909	8.31228	8.11251	8.09156	8.54019	8.54428	8.50204	8.52547	8.37053	8.39533	8.21722	8.4999	8.30729	8.41451	8.18634	8.17931	7.84737	8.18905	5.20582	8.39277	8.38703	8.30781	8.17221	8.27007	8.05065	8.34013	8.09056	8.25072	8.12013	8.37104	7.98957	8.33389	8.10786	7.90304	8.32758	8.42981	8.32449
1700030L20Rik	3.0418	3.0418	3.0418	3.0418	3.0418	3.0418	3.0418	3.0418	3.0418	3.0418	3.0418	3.0418	3.0418	3.0418	3.0418	3.0418	3.0418	3.0418	3.0418	3.0418	3.0418	3.0418	3.0418	3.0418	3.0418	3.0418	3.0418	3.0418	3.0418	3.0418	3.0418	3.0418	3.0418	3.0418	3.0418	3.0418	3.0418	3.0418	3.0418	3.0418	3.0418	3.0418	3.0418	3.0418	3.0418	3.0418	3.0418	3.0418	3.0418
1700030M09Rik	3.0418	3.0418	3.0418	3.0418	3.0418	3.39271	3.0418	3.0418	3.47186	3.0418	3.0418	3.51431	3.37071	3.0418	3.0418	3.0418	3.40864	3.0418	3.0418	3.0418	3.0418	3.0418	3.0418	3.0418	3.0418	3.0418	3.0418	3.0418	3.0418	3.0418	3.0418	3.45123	3.0418	3.0418	3.0418	3.0418	3.0418	3.0418	3.59585	3.72997	3.0418	3.7423	3.0418	3.0418	3.0418	3.0418	3.0418	3.0418	3.0418
1700030N03Rik	3.0418	3.0418	3.0418	3.0418	3.0418	3.0418	3.0418	3.0418	3.0418	3.0418	3.0418	3.0418	3.0418	3.0418	3.0418	3.0418	3.0418	3.0418	3.0418	3.0418	3.0418	3.0418	3.0418	3.0418	3.0418	3.0418	3.0418	3.0418	3.0418	3.0418	3.0418	3.0418	3.0418	3.0418	3.0418	3.0418	3.0418	3.0418	3.0418	3.0418	3.0418	3.0418	3.0418	3.0418	3.0418	3.0418	3.0418	3.0418	3.0418
1700030O20Rik	3.0418	3.0418	3.0418	3.0418	3.0418	3.0418	3.0418	3.0418	3.0418	3.0418	3.0418	3.0418	3.0418	3.0418	3.0418	3.0418	3.0418	3.0418	3.0418	3.0418	3.0418	3.35796	3.0418	3.0418	3.0418	3.0418	3.0418	3.0418	3.0418	3.0418	3.0418	3.0418	3.0418	3.0418	3.0418	3.0418	3.0418	3.0418	3.43477	3.0418	3.0418	3.0418	3.0418	3.0418	3.0418	3.0418	3.0418	3.0418	3.45704
1700031A10Rik	3.0418	3.0418	3.0418	3.0418	3.0418	3.0418	3.0418	3.0418	3.0418	3.0418	3.0418	3.0418	3.0418	3.0418	3.0418	3.0418	3.0418	3.0418	3.0418	3.0418	3.0418	3.0418	3.0418	3.0418	3.0418	3.0418	3.0418	3.0418	3.0418	3.0418	3.0418	3.0418	3.0418	3.40188	3.0418	3.0418	3.0418	3.0418	3.59585	3.0418	3.0418	3.0418	3.0418	3.0418	3.0418	3.0418	3.0418	3.0418	3.0418
1700031F05Rik	3.0418	3.0418	3.0418	3.0418	3.0418	3.0418	3.0418	3.0418	3.0418	3.0418	3.0418	3.0418	3.0418	3.0418	3.0418	3.0418	3.0418	3.0418	3.0418	3.0418	3.0418	3.0418	3.0418	3.0418	3.0418	3.0418	3.0418	3.0418	3.0418	3.0418	3.0418	3.0418	3.0418	3.0418	3.0418	3.0418	3.0418	3.0418	3.0418	3.0418	3.0418	3.0418	3.45728	3.0418	3.0418	3.0418	3.0418	3.0418	3.0418
1700031M16Rik	3.0418	3.0418	3.0418	3.0418	3.0418	3.0418	3.0418	3.0418	3.0418	3.0418	3.0418	3.0418	3.0418	3.0418	3.0418	3.0418	3.0418	3.0418	3.0418	3.0418	3.0418	3.0418	3.0418	3.0418	3.0418	3.0418	3.0418	3.0418	3.0418	3.0418	3.0418	3.0418	3.0418	3.0418	3.0418	3.47886	3.0418	3.0418	3.0418	3.0418	3.0418	3.0418	3.0418	3.0418	3.0418	3.0418	3.47172	3.0418	3.0418
1700031P21Rik	3.0418	3.0418	3.0418	3.0418	3.0418	3.0418	3.0418	3.0418	3.0418	3.0418	3.0418	3.0418	3.0418	3.0418	3.0418	3.0418	3.0418	3.0418	3.0418	3.0418	3.37344	3.0418	3.0418	3.0418	3.0418	3.0418	3.0418	3.0418	3.0418	3.0418	3.0418	3.0418	3.0418	3.0418	3.0418	3.0418	3.0418	3.0418	3.0418	3.0418	3.0418	3.0418	3.0418	3.0418	3.0418	3.0418	3.0418	3.0418	3.0418
1700034E13Rik	3.0418	3.0418	3.0418	3.0418	3.0418	3.39271	3.0418	3.0418	3.0418	3.0418	3.0418	3.0418	3.0418	3.0418	3.0418	3.0418	3.0418	3.0418	3.0418	3.0418	3.0418	3.0418	3.0418	3.0418	3.0418	3.44142	3.0418	3.0418	3.0418	3.0418	3.0418	3.0418	3.0418	3.0418	3.0418	3.0418	3.43815	3.0418	3.0418	3.53069	3.42345	3.0418	3.0418	3.0418	3.0418	3.0418	3.0418	3.0418	3.0418
1700034F02Rik	4.38637	4.08514	4.24762	4.41172	4.36319	4.39837	3.74903	4.28064	3.83915	4.17438	4.34725	3.85314	4.199	4.11213	4.17093	4.09661	4.06085	4.37216	3.76908	3.86768	4.20815	4.46879	3.73895	3.87509	4.04918	4.21212	4.16112	4.07222	4.05841	4.2277	3.63087	4.23952	4.4834	4.20719	3.95391	4.70336	4.93118	5.27741	4.97881	4.52855	4.27351	4.62081	4.25635	4.44271	4.27865	4.12082	5.03659	4.25419	4.75549
1700034G24Rik	3.0418	3.0418	3.0418	3.48967	3.0418	3.0418	3.0418	3.0418	3.0418	3.0418	3.0418	3.0418	3.0418	3.0418	3.0418	3.0418	3.0418	3.0418	3.0418	3.0418	3.0418	3.0418	3.0418	3.0418	3.0418	3.0418	3.57008	3.0418	3.0418	3.0418	3.0418	3.0418	3.0418	3.40188	3.0418	3.0418	3.0418	3.0418	3.0418	3.0418	3.42345	3.0418	3.0418	3.0418	3.0418	3.0418	3.0418	3.0418	3.0418
1700034H15Rik	3.66036	3.47545	3.0418	3.81149	4.48802	4.35809	5.02493	4.82928	4.2968	3.97417	4.61642	4.30124	4.74633	4.52433	4.17093	4.09661	4.9208	4.28771	4.60736	4.04673	4.24981	4.19608	4.67714	4.20494	4.66028	4.48133	3.89674	3.90168	3.76793	3.73911	4.32541	4.51415	5.01015	4.43148	4.31189	4.79357	4.86568	4.41337	4.25248	4.30112	4.03476	3.89567	4.25635	3.0418	4.59655	4.29681	4.58214	4.16871	4.31747
1700034I23Rik	3.91013	3.78741	3.5089	3.67269	3.55615	3.53686	3.65579	3.88141	4.19312	3.87854	3.98009	3.85314	3.95861	3.9521	3.88511	3.88245	3.7697	3.53704	3.76908	4.04673	4.07089	3.86859	3.73895	3.78914	3.55311	3.92439	3.78484	3.68106	3.55793	3.89182	3.63087	3.61891	3.89661	3.9128	4.31189	3.47886	4.13968	3.0418	3.71833	3.72997	3.57998	3.7423	3.45728	3.55409	3.0418	4.12082	3.78108	3.0418	3.0418
1700034J05Rik	4.00912	4.30674	3.96428	4.20014	3.0418	3.53686	4.03244	3.46602	3.34646	3.0418	3.71101	3.37666	3.50595	3.45428	3.39016	3.50677	3.92875	3.6791	3.0418	3.62972	3.50979	3.80871	3.73895	3.0418	3.0418	3.44142	3.57008	3.56516	3.0418	3.0418	3.0418	3.0418	3.89661	3.75649	4.31189	3.65758	4.26237	3.0418	3.82067	3.88077	3.42345	3.53954	3.62738	3.55409	3.0418	3.81346	3.47172	3.96943	3.45704
1700034K08Rik	3.0418	3.0418	3.0418	3.0418	3.0418	3.0418	3.0418	3.0418	3.0418	3.0418	3.0418	3.0418	3.0418	3.0418	3.0418	3.0418	3.0418	3.0418	3.0418	3.0418	3.0418	3.0418	3.0418	3.0418	3.0418	3.0418	3.0418	3.0418	3.0418	3.0418	3.0418	3.0418	3.0418	3.0418	3.0418	3.0418	3.0418	3.0418	3.0418	3.0418	3.0418	3.0418	3.0418	3.0418	3.0418	3.0418	3.0418	3.0418	3.0418
1700034O15Rik	3.48085	3.0418	3.0418	3.0418	3.0418	3.0418	3.0418	3.0418	3.0418	3.0418	3.0418	3.37666	3.0418	3.45428	3.0418	3.0418	3.0418	3.0418	3.0418	3.0418	3.0418	3.0418	3.0418	3.0418	3.40429	3.0418	3.34794	3.0418	3.0418	3.0418	3.0418	3.0418	3.0418	3.0418	3.0418	3.0418	3.0418	3.0418	3.0418	3.0418	3.0418	3.0418	3.45728	3.0418	3.0418	3.0418	3.0418	3.0418	3.0418
1700034P13Rik	3.91013	3.78741	3.5089	3.92718	3.84881	3.81897	3.74903	3.63962	3.0418	3.63755	3.0418	3.61924	3.60906	3.45428	3.9506	3.79578	3.0418	3.44682	3.0418	3.45895	3.70079	3.35796	3.73895	3.41859	3.76121	3.0418	3.72133	3.56516	4.45255	3.89182	3.63087	3.94554	4.23421	4.10089	4.2071	4.09306	3.82725	3.90095	3.91006	3.53069	3.9636	3.89567	4.11961	3.76258	3.0418	3.59066	3.78108	3.70328	3.86398
1700036G14Rik	3.0418	3.0418	3.0418	3.0418	3.0418	3.0418	3.0418	3.0418	3.0418	3.0418	3.0418	3.0418	3.0418	3.0418	3.0418	3.0418	3.0418	3.0418	3.0418	3.0418	3.0418	3.0418	3.0418	3.0418	3.0418	3.0418	3.0418	3.0418	3.0418	3.0418	3.0418	3.0418	3.0418	3.0418	3.0418	3.0418	3.0418	3.0418	3.0418	3.0418	3.0418	3.0418	3.0418	3.0418	3.0418	3.0418	3.0418	3.0418	3.0418
1700037C18Rik	6.06509	6.10244	6.19012	6.42769	5.95239	6.01962	5.72919	6.06819	5.66936	5.85879	5.51259	5.9997	5.85442	5.65445	5.88828	5.89786	5.95297	5.94854	5.94679	5.7748	5.80493	5.90227	5.43746	5.84958	5.97619	5.93416	5.72186	5.96576	5.90891	6.29235	5.14726	6.36491	6.41158	6.16453	6.19757	6.30053	6.20394	6.29965	5.98533	6.39935	6.43301	6.30325	6.2498	6.21568	6.51971	6.59385	6.21911	6.35239	6.68723
1700037H04Rik	8.20951	7.98355	7.94813	8.04561	9.04104	9.11997	9.1408	9.16573	9.06329	9.11848	8.87378	9.04912	9.19571	9.01462	9.0994	9.11198	9.30492	9.4221	9.68086	9.47807	9.41095	9.32407	8.88917	9.32709	9.13033	9.11949	9.20255	9.37543	8.56412	9.39345	7.96623	9.15115	9.13969	9.22155	9.01907	9.19295	8.71975	9.19189	8.56843	9.00231	9.2248	9.10575	9.21275	9.12361	9.23439	9.27784	8.88371	9.14697	9.25884
1700039E15Rik	3.0418	3.0418	3.5089	3.48967	3.0418	3.39271	3.0418	3.46602	3.0418	3.0418	3.0418	3.0418	3.37071	3.0418	3.0418	3.0418	3.0418	3.0418	3.0418	3.0418	3.0418	3.0418	3.0418	3.0418	3.40429	3.0418	3.0418	3.0418	3.0418	3.0418	3.0418	3.0418	3.0418	3.0418	3.0418	3.0418	3.0418	3.0418	3.0418	3.0418	3.42345	3.53954	3.0418	3.0418	3.0418	3.0418	3.64758	3.0418	3.0418
1700039E22Rik	3.0418	3.0418	3.0418	3.0418	3.0418	3.0418	3.0418	3.0418	3.0418	3.0418	3.0418	3.0418	3.0418	3.0418	3.0418	3.0418	3.0418	3.0418	3.0418	3.0418	3.0418	3.35796	3.0418	3.0418	3.0418	3.0418	3.34794	3.0418	3.0418	3.0418	3.0418	3.0418	3.0418	3.0418	3.0418	3.0418	3.0418	3.0418	3.0418	3.0418	3.0418	3.0418	3.62738	3.0418	3.0418	3.0418	3.0418	3.0418	3.0418
1700040L02Rik	4.00912	3.99755	3.5089	3.92718	4.63512	4.54594	4.49491	4.21354	4.3291	4.27655	4.18146	4.54678	4.45833	4.1825	4.34907	4.18674	4.7434	4.71727	4.82405	4.76261	4.40108	4.23447	4.12893	4.20494	4.35579	4.48133	4.08162	4.3156	4.45255	4.0188	4.32541	4.51415	3.89661	4.3029	4.40689	4.31616	3.60058	3.54267	4.81792	4.71722	4.32499	4.23294	4.37644	4.16478	4.33032	4.76827	4.41994	4.65732	4.90737
1700041C23Rik	3.0418	3.0418	3.0418	3.0418	3.0418	3.0418	3.0418	3.0418	3.0418	3.0418	3.0418	3.0418	3.0418	3.45428	3.0418	3.0418	3.0418	3.0418	3.0418	3.0418	3.0418	3.0418	3.0418	3.0418	3.0418	3.0418	3.34794	3.0418	3.0418	3.0418	3.0418	3.0418	3.0418	3.0418	3.0418	3.0418	3.0418	3.0418	3.0418	3.0418	3.0418	3.0418	3.0418	3.0418	3.0418	3.0418	3.0418	3.0418	3.0418
1700041M19Rik	3.0418	3.0418	3.0418	3.0418	3.0418	3.0418	3.0418	3.0418	3.0418	3.0418	3.0418	3.0418	3.0418	3.0418	3.0418	3.0418	3.0418	3.0418	3.0418	3.0418	3.0418	3.0418	3.0418	3.0418	3.0418	3.0418	3.0418	3.0418	3.0418	3.0418	3.0418	3.0418	3.0418	3.0418	3.0418	3.0418	3.0418	3.0418	3.0418	3.0418	3.0418	3.0418	3.0418	3.0418	3.0418	3.0418	3.0418	3.0418	3.45704
1700042B14Rik	3.0418	3.0418	3.0418	3.0418	3.0418	3.0418	3.0418	3.0418	3.0418	3.0418	3.0418	3.0418	3.0418	3.0418	3.0418	3.0418	3.0418	3.0418	3.0418	3.0418	3.0418	3.0418	3.0418	3.0418	3.0418	3.0418	3.0418	3.0418	3.0418	3.0418	3.0418	3.0418	3.0418	3.0418	3.0418	3.0418	3.0418	3.0418	3.0418	3.53069	3.0418	3.0418	3.0418	3.0418	3.0418	3.0418	3.0418	3.0418	3.0418
1700042G07Rik	3.0418	3.0418	3.0418	3.0418	3.0418	3.0418	3.0418	3.0418	3.0418	3.0418	3.0418	3.0418	3.0418	3.0418	3.0418	3.0418	3.0418	3.0418	3.0418	3.0418	3.0418	3.0418	3.0418	3.0418	3.0418	3.0418	3.0418	3.0418	3.0418	3.0418	3.0418	3.0418	3.0418	3.0418	3.0418	3.0418	3.0418	3.0418	3.0418	3.0418	3.42345	3.53954	3.62738	3.0418	3.0418	3.0418	3.0418	3.0418	3.0418
1700042G15Rik	3.0418	3.0418	3.0418	3.0418	3.0418	3.0418	3.0418	3.0418	3.0418	3.0418	3.0418	3.0418	3.0418	3.0418	3.0418	3.0418	3.0418	3.0418	3.0418	3.0418	3.0418	3.0418	3.0418	3.0418	3.0418	3.0418	3.0418	3.41288	3.0418	3.0418	3.0418	3.0418	3.0418	3.0418	3.0418	3.0418	3.43815	3.0418	3.0418	3.0418	3.0418	3.0418	3.75658	3.55409	3.0418	3.0418	3.0418	3.51157	3.0418
1700042O10Rik	3.79656	3.65281	3.844	4.02797	3.55615	3.81897	4.03244	3.97733	3.78132	4.05977	3.0418	3.78404	4.15577	4.11213	3.39016	3.74806	3.55921	3.73882	3.76908	3.45895	3.966	3.74323	3.0418	4.08751	4.04918	4.00575	3.47394	3.93875	4.27493	4.39939	3.0418	3.74631	3.5401	3.9128	3.79057	4.31616	4.07172	3.74667	3.43477	4.00621	3.88559	4.32274	4.48417	3.0418	3.88922	4.29681	3.78108	4.33287	4.31747
1700044C05Rik	3.0418	3.0418	3.0418	3.0418	3.0418	3.0418	3.0418	3.0418	3.0418	3.0418	3.0418	3.0418	3.0418	3.0418	3.0418	3.0418	3.0418	3.0418	3.0418	3.0418	3.0418	3.0418	3.0418	3.0418	3.0418	3.0418	3.0418	3.0418	3.55793	3.0418	3.0418	3.0418	3.0418	3.0418	3.0418	3.0418	3.0418	3.0418	3.0418	3.0418	3.0418	3.0418	3.0418	3.0418	3.0418	3.0418	3.0418	3.0418	3.0418
1700044K03Rik	3.0418	3.0418	3.0418	3.0418	3.0418	3.0418	3.0418	3.0418	3.0418	3.0418	3.0418	3.0418	3.0418	3.0418	3.0418	3.0418	3.0418	3.0418	3.0418	3.0418	3.0418	3.0418	3.0418	3.0418	3.0418	3.0418	3.0418	3.0418	3.0418	3.0418	3.0418	3.0418	3.0418	3.0418	3.0418	3.0418	3.0418	3.0418	3.0418	3.0418	3.0418	3.0418	3.0418	3.0418	3.0418	3.0418	3.0418	3.0418	3.45704
1700045H11Rik	3.0418	3.0418	3.0418	3.0418	3.0418	3.0418	3.0418	3.0418	3.0418	3.0418	3.0418	3.0418	3.0418	3.0418	3.0418	3.0418	3.0418	3.0418	3.0418	3.0418	3.0418	3.0418	3.0418	3.0418	3.0418	3.0418	3.0418	3.0418	3.0418	3.0418	3.0418	3.45123	3.0418	3.0418	3.0418	3.0418	3.0418	3.0418	3.0418	3.0418	3.0418	3.0418	3.0418	3.0418	3.0418	3.0418	3.0418	3.0418	3.0418
1700046C09Rik	3.0418	3.0418	3.0418	3.0418	3.0418	3.0418	3.0418	3.0418	3.0418	3.0418	3.0418	3.0418	3.0418	3.0418	3.0418	3.0418	3.0418	3.0418	3.0418	3.0418	3.0418	3.0418	3.0418	3.0418	3.0418	3.0418	3.0418	3.0418	3.0418	3.53725	3.0418	3.0418	3.0418	3.0418	3.0418	3.0418	3.0418	3.0418	3.0418	3.0418	3.0418	3.0418	3.0418	3.0418	3.0418	3.0418	3.0418	3.0418	3.0418
1700047A11Rik	3.79656	3.47545	4.06899	3.92718	3.67012	3.53686	3.65579	3.88141	3.34646	3.55864	3.0418	3.78404	3.50595	3.7515	3.0418	3.50677	3.0418	3.89146	3.76908	3.0418	3.50979	3.58724	3.73895	3.0418	3.0418	3.44142	3.72133	3.49566	3.76793	3.89182	3.86928	3.0418	3.89661	3.54972	3.79057	3.47886	3.0418	3.54267	4.30811	3.0418	3.0418	3.7423	3.86444	3.55409	3.0418	3.0418	3.89244	4.07468	3.0418
1700047E10Rik	3.0418	3.0418	3.0418	3.0418	3.0418	3.0418	3.0418	3.0418	3.0418	3.0418	3.0418	3.0418	3.0418	3.0418	3.0418	3.0418	3.0418	3.0418	3.0418	3.0418	3.0418	3.0418	3.0418	3.0418	3.0418	3.0418	3.0418	3.0418	3.0418	3.53725	3.0418	3.0418	3.0418	3.0418	3.0418	3.0418	3.0418	3.0418	3.0418	3.0418	3.0418	3.0418	3.0418	3.0418	3.0418	3.0418	3.0418	3.0418	3.0418
1700047G03Rik	3.0418	3.65281	3.0418	3.0418	3.0418	3.0418	3.0418	3.0418	3.0418	3.0418	3.0418	3.0418	3.0418	3.45428	3.0418	3.0418	3.40864	3.0418	3.46464	3.0418	3.0418	3.0418	3.0418	3.0418	3.0418	3.0418	3.0418	3.0418	3.0418	3.53725	3.0418	3.74631	3.89661	3.40188	3.0418	3.0418	3.60058	3.0418	3.0418	3.0418	3.69906	3.0418	3.62738	3.0418	3.42512	3.90206	3.0418	3.51157	3.0418
1700047I17Rik2	3.0418	3.0418	3.0418	3.0418	3.0418	3.0418	3.0418	3.0418	3.0418	3.0418	3.0418	3.0418	3.0418	3.0418	3.0418	3.0418	3.0418	3.0418	3.0418	3.0418	3.0418	3.0418	3.0418	3.0418	3.0418	3.0418	3.0418	3.0418	3.0418	3.0418	3.0418	3.0418	3.0418	3.0418	3.0418	3.0418	3.0418	3.0418	3.0418	3.0418	3.0418	3.0418	3.0418	3.0418	3.0418	3.0418	3.0418	3.0418	3.0418
1700047L14Rik	3.0418	3.0418	3.0418	3.0418	3.0418	3.0418	3.0418	3.0418	3.0418	3.0418	3.0418	3.0418	3.0418	3.0418	3.0418	3.0418	3.0418	3.0418	3.0418	3.0418	3.0418	3.0418	3.0418	3.0418	3.0418	3.0418	3.0418	3.0418	3.0418	3.0418	3.0418	3.0418	3.0418	3.0418	3.0418	3.0418	3.0418	3.0418	3.0418	3.0418	3.0418	3.0418	3.0418	3.0418	3.0418	3.0418	3.0418	3.0418	3.0418
1700047M11Rik	3.0418	3.0418	3.5089	3.0418	3.0418	3.0418	3.0418	3.0418	3.0418	3.0418	3.0418	3.0418	3.0418	3.0418	3.0418	3.0418	3.0418	3.32866	3.0418	3.0418	3.0418	3.0418	3.0418	3.41859	3.0418	3.0418	3.0418	3.0418	3.0418	3.0418	3.0418	3.0418	3.0418	3.0418	3.0418	3.0418	3.0418	3.0418	3.0418	3.0418	3.0418	3.0418	3.0418	3.0418	3.42512	3.0418	3.0418	3.0418	3.0418
1700048M11Rik	3.66036	3.89967	3.5089	3.67269	4.40644	4.2268	4.60147	4.51237	4.15594	4.48132	4.49006	4.57776	4.39061	4.52433	4.34907	4.15766	4.06085	4.54645	4.2768	4.12378	4.5941	4.37473	4.22742	4.7182	4.3109	4.07992	4.63891	4.33927	4.36751	4.39939	5.5994	3.94554	4.02426	4.15555	4.31189	4.00486	4.37153	4.0292	3.99018	4.1153	4.5088	4.4819	4.31816	4.26617	4.10497	4.12082	4.22854	4.07468	4.31747
1700048O20Rik	5.35567	5.6319	5.76581	6.12726	5.80704	6.08449	7.06686	6.95676	5.94992	5.43945	5.72996	5.59979	5.71647	6.28459	5.12039	5.31427	5.48988	5.35567	5.89493	5.82976	5.65912	5.42922	5.76654	5.84958	6.6505	6.59283	5.32511	5.64905	6.16971	5.76705	4.63702	6.54222	6.78287	7.29764	7.42179	6.96388	7.3656	7.50405	5.78666	6.12769	6.48103	6.37455	7.3385	5.23877	5.38358	5.39226	6.14497	6.36802	6.8602
1700049E15Rik	3.0418	3.0418	3.0418	3.0418	3.0418	3.0418	3.0418	3.0418	3.0418	3.0418	3.0418	3.0418	3.0418	3.0418	3.0418	3.0418	3.0418	3.0418	3.0418	3.0418	3.0418	3.0418	3.0418	3.0418	3.0418	3.0418	3.0418	3.30456	3.0418	3.0418	3.0418	3.0418	3.0418	3.0418	3.0418	3.0418	3.0418	3.0418	3.0418	3.72997	3.0418	3.53954	3.0418	3.76258	3.0418	3.0418	3.0418	3.0418	3.0418
1700049E22Rik	3.0418	3.0418	3.0418	3.0418	3.0418	3.0418	3.0418	3.0418	3.0418	3.0418	3.0418	3.0418	3.0418	3.0418	3.0418	3.0418	3.0418	3.0418	3.0418	3.0418	3.0418	3.0418	3.0418	3.0418	3.0418	3.0418	3.0418	3.0418	3.0418	3.0418	3.0418	3.0418	3.0418	3.0418	3.0418	3.47886	3.0418	3.0418	3.0418	3.0418	3.0418	3.0418	3.0418	3.0418	3.0418	3.0418	3.47172	3.0418	3.0418
1700049G17Rik	6.79658	6.72505	6.51553	6.51938	6.38131	6.5176	5.91328	6.12946	7.27263	6.96452	6.59913	6.43538	5.84344	6.3707	7.02029	7.07416	5.95297	6.17735	6.07632	5.99868	6.83567	6.67763	6.58725	6.53242	6.00035	5.80619	6.72149	6.6892	7.94427	7.04101	7.11362	5.87571	6.61667	6.06661	6.32693	6.60383	6.83381	6.68705	7.17482	6.261	5.989	6.79308	7.08358	6.40816	6.67747	6.7566	6.60807	6.25482	6.45657
1700049L16Rik	3.0418	3.0418	3.0418	3.0418	3.0418	3.0418	3.0418	3.0418	3.34646	3.0418	3.0418	3.0418	3.50595	3.0418	3.0418	3.0418	3.0418	3.0418	3.0418	3.0418	3.0418	3.0418	3.0418	3.0418	3.0418	3.0418	3.0418	3.0418	3.0418	3.0418	3.0418	3.0418	3.0418	3.40188	3.0418	3.0418	3.0418	3.0418	3.0418	3.0418	3.0418	3.0418	3.0418	3.0418	3.0418	3.0418	3.0418	3.0418	3.0418
1700051A21Rik	3.0418	3.0418	3.0418	3.0418	3.0418	3.0418	3.0418	3.0418	3.0418	3.0418	3.0418	3.0418	3.0418	3.0418	3.0418	3.0418	3.0418	3.0418	3.0418	3.0418	3.0418	3.0418	3.0418	3.0418	3.0418	3.0418	3.0418	3.0418	3.0418	3.0418	3.0418	3.0418	3.0418	3.0418	3.0418	3.0418	3.0418	3.0418	3.0418	3.0418	3.0418	3.0418	3.0418	3.0418	3.0418	3.0418	3.0418	3.0418	3.0418
1700052I22Rik	3.0418	3.0418	3.0418	3.0418	3.0418	3.0418	3.0418	3.0418	3.0418	3.0418	3.0418	3.0418	3.0418	3.0418	3.0418	3.0418	3.0418	3.0418	3.0418	3.0418	3.0418	3.0418	3.0418	3.0418	3.0418	3.0418	3.0418	3.0418	3.0418	3.0418	3.0418	3.0418	3.0418	3.0418	3.0418	3.0418	3.0418	3.0418	3.43477	3.0418	3.42345	3.0418	3.0418	3.0418	3.0418	3.0418	3.0418	3.0418	3.0418
1700052K11Rik	7.11851	7.06243	7.17001	7.21742	6.48811	6.3789	6.35334	6.54225	6.55291	6.61523	6.39599	6.66344	6.68762	6.72758	6.64013	6.45286	6.76807	6.60642	6.47728	6.73685	6.61396	6.59053	6.57235	6.32236	6.73128	6.7555	6.61523	6.40423	6.37094	6.92885	6.41417	7.03858	7.43337	7.35799	7.47807	6.92807	7.5312	7.43033	7.13105	6.97418	6.93063	7.33609	7.16215	7.32016	7.0025	7.31284	6.71378	7.06613	6.86875
1700052N19Rik	9.65692	9.57563	9.57326	9.44045	9.14311	9.20263	9.28787	9.48309	9.25481	9.38142	9.31086	9.11555	9.29385	9.41638	9.20345	9.28893	9.15039	9.28375	9.26576	9.4483	9.27809	9.18334	9.33699	8.96551	9.42177	9.3223	9.21977	9.32579	9.33052	9.30448	7.89199	9.11859	9.12695	9.04827	9.08083	9.51023	9.57587	9.46797	9.48752	9.17433	9.38724	9.02852	9.46806	9.26322	9.15668	9.09576	9.41282	9.26943	9.57438
1700054A03Rik	3.0418	3.0418	3.5089	3.0418	3.0418	3.0418	3.0418	3.0418	3.0418	3.0418	3.0418	3.0418	3.0418	3.45428	3.0418	3.0418	3.0418	3.0418	3.0418	3.0418	3.0418	3.0418	3.0418	3.0418	3.0418	3.0418	3.0418	3.0418	3.0418	3.0418	3.0418	3.0418	3.0418	3.0418	3.0418	3.0418	3.0418	3.0418	3.0418	3.0418	3.0418	3.0418	3.0418	3.0418	3.0418	3.0418	3.0418	3.0418	3.0418
1700054K19Rik	3.0418	3.0418	3.0418	3.0418	3.0418	3.0418	3.0418	3.0418	3.0418	3.0418	3.0418	3.0418	3.0418	3.0418	3.0418	3.0418	3.0418	3.0418	3.0418	3.0418	3.0418	3.0418	3.0418	3.0418	3.0418	3.0418	3.0418	3.0418	3.0418	3.0418	3.0418	3.0418	3.0418	3.0418	3.0418	3.0418	3.0418	3.0418	3.0418	3.0418	3.0418	3.0418	3.0418	3.0418	3.0418	3.0418	3.0418	3.0418	3.0418
1700054M17Rik	3.0418	3.0418	3.0418	3.0418	3.0418	3.0418	3.0418	3.0418	3.0418	3.0418	3.0418	3.0418	3.0418	3.0418	3.0418	3.0418	3.0418	3.0418	3.0418	3.0418	3.0418	3.0418	3.0418	3.0418	3.0418	3.0418	3.0418	3.0418	3.0418	3.0418	3.0418	3.0418	3.0418	3.0418	3.0418	3.47886	3.43815	3.54267	3.43477	3.0418	3.0418	3.0418	3.0418	3.0418	3.0418	3.0418	3.0418	3.0418	3.0418
1700054O13Rik	3.0418	3.47545	3.0418	3.0418	3.0418	3.0418	3.0418	3.0418	3.0418	3.0418	3.0418	3.0418	3.37071	3.0418	3.0418	3.0418	3.0418	3.0418	3.0418	3.0418	3.0418	3.0418	3.0418	3.0418	3.40429	3.0418	3.34794	3.0418	3.0418	3.0418	3.0418	3.0418	3.0418	3.0418	3.0418	3.0418	3.0418	3.0418	3.0418	3.0418	3.0418	3.0418	3.45728	3.0418	3.0418	3.0418	3.0418	3.0418	3.0418
1700055C04Rik	3.0418	3.0418	3.0418	3.0418	3.0418	3.0418	3.0418	3.0418	3.0418	3.0418	3.0418	3.0418	3.0418	3.0418	3.0418	3.0418	3.0418	3.0418	3.0418	3.0418	3.0418	3.0418	3.0418	3.0418	3.0418	3.0418	3.0418	3.0418	3.0418	3.0418	3.0418	3.0418	3.0418	3.0418	3.0418	3.0418	3.0418	3.0418	3.0418	3.0418	3.0418	3.0418	3.0418	3.0418	3.0418	3.0418	3.0418	3.0418	3.0418
1700055N04Rik	3.0418	3.0418	3.0418	3.0418	3.0418	3.0418	3.0418	3.0418	3.0418	3.0418	3.0418	3.0418	3.0418	3.0418	3.0418	3.0418	3.0418	3.0418	3.0418	3.0418	3.0418	3.0418	3.0418	3.0418	3.0418	3.0418	3.0418	3.0418	3.0418	3.0418	3.0418	3.0418	3.5401	3.40188	3.57419	3.0418	3.0418	3.0418	3.0418	3.0418	3.42345	3.0418	3.0418	3.0418	3.0418	3.43106	3.0418	3.51157	3.0418
1700056E22Rik	5.03793	5.01646	4.53078	4.74061	4.16913	3.64666	4.29026	3.88141	4.19312	4.0996	3.98009	4.44833	4.24037	4.1825	4.06766	4.06447	4.06085	3.93604	4.69885	4.48958	4.07089	4.30702	4.22742	4.20494	4.35579	4.32835	4.23439	4.07222	4.7396	4.6775	6.48375	4.81132	4.4834	5.11362	5.02387	4.60569	4.64488	4.81213	4.25248	5.02352	4.89961	5.18532	4.87206	4.90427	5.40444	5.07738	4.80993	5.08093	4.71434
1700057G04Rik	3.48085	3.0418	3.0418	3.48967	3.0418	3.0418	3.0418	3.0418	3.0418	3.0418	3.0418	3.0418	3.0418	3.0418	3.0418	3.0418	3.0418	3.32866	3.0418	3.0418	3.37344	3.0418	3.53713	3.0418	3.0418	3.0418	3.0418	3.30456	3.0418	3.0418	3.0418	3.0418	3.0418	3.0418	3.0418	3.0418	3.43815	3.54267	3.0418	3.0418	3.0418	3.89567	3.0418	3.0418	3.42512	3.0418	3.47172	3.70328	3.0418
1700057H15Rik	3.0418	3.0418	3.0418	3.0418	3.0418	3.0418	3.0418	3.0418	3.0418	3.0418	3.0418	3.0418	3.0418	3.0418	3.0418	3.0418	3.0418	3.0418	3.0418	3.0418	3.0418	3.0418	3.0418	3.0418	3.0418	3.0418	3.0418	3.0418	3.0418	3.0418	3.0418	3.0418	3.0418	3.0418	3.57419	3.47886	3.0418	3.0418	3.0418	3.0418	3.0418	3.0418	3.0418	3.0418	3.0418	3.0418	3.0418	3.51157	3.0418
1700060C16Rik	3.0418	3.0418	3.0418	3.0418	3.0418	3.0418	3.0418	3.0418	3.0418	3.0418	3.0418	3.0418	3.0418	3.0418	3.0418	3.0418	3.0418	3.0418	3.0418	3.0418	3.0418	3.0418	3.0418	3.0418	3.0418	3.0418	3.0418	3.0418	3.0418	3.0418	3.0418	3.0418	3.5401	3.0418	3.0418	3.0418	3.0418	3.0418	3.0418	3.0418	3.0418	3.0418	3.0418	3.0418	3.0418	3.0418	3.0418	3.0418	3.0418
1700060C20Rik	3.0418	3.0418	3.0418	3.0418	3.0418	3.0418	3.0418	3.0418	3.0418	3.0418	3.0418	3.0418	3.0418	3.0418	3.0418	3.0418	3.0418	3.0418	3.0418	3.0418	3.0418	3.0418	3.0418	3.0418	3.0418	3.0418	3.34794	3.0418	3.0418	3.0418	3.0418	3.0418	3.0418	3.0418	3.0418	3.0418	3.0418	3.0418	3.0418	3.0418	3.0418	3.0418	3.0418	3.0418	3.0418	3.0418	3.0418	3.0418	3.0418
1700061F12Rik	3.0418	3.0418	3.0418	3.0418	3.67012	3.0418	3.65579	3.77143	3.0418	3.0418	3.0418	3.37666	3.0418	3.0418	3.0418	3.0418	3.40864	3.32866	3.0418	3.0418	3.37344	3.35796	3.0418	3.0418	3.76121	3.0418	3.0418	3.0418	3.0418	3.0418	3.0418	3.45123	3.5401	3.0418	3.0418	3.0418	3.0418	3.0418	3.0418	3.0418	3.0418	3.0418	3.0418	3.76258	3.0418	3.0418	3.0418	3.0418	3.0418
1700061G19Rik	4.32166	4.59446	3.96428	4.34594	4.76557	4.57995	4.69893	4.82928	4.42037	4.55843	4.83411	4.41343	4.79629	4.70426	4.86277	4.64221	4.57232	4.25792	4.60736	4.43689	4.75907	4.75852	4.47538	4.75204	4.72517	4.43273	4.79715	4.51162	4.27493	4.31715	4.54259	4.7338	5.10181	4.61677	4.31189	4.55355	4.51661	4.24011	4.45902	4.59494	4.42084	4.23294	4.37644	4.44271	4.51478	4.69583	4.36001	4.65732	4.25569
1700061I17Rik	3.0418	3.0418	3.0418	3.0418	3.0418	3.0418	3.0418	3.0418	3.0418	3.0418	3.0418	3.0418	3.0418	3.0418	3.0418	3.0418	3.0418	3.0418	3.0418	3.0418	3.0418	3.0418	3.0418	3.0418	3.0418	3.0418	3.0418	3.0418	3.0418	3.0418	3.0418	3.45123	3.0418	3.0418	3.0418	3.0418	3.0418	3.0418	3.0418	3.0418	3.0418	3.0418	3.0418	3.0418	3.0418	3.0418	3.47172	3.70328	3.0418
1700063A18Rik	3.0418	3.0418	3.0418	3.0418	3.0418	3.0418	3.0418	3.0418	3.0418	3.0418	3.0418	3.0418	3.0418	3.0418	3.0418	3.0418	3.0418	3.0418	3.0418	3.0418	3.0418	3.0418	3.0418	3.0418	3.0418	3.0418	3.0418	3.0418	3.0418	3.0418	3.0418	3.0418	3.0418	3.0418	3.0418	3.0418	3.0418	3.0418	3.0418	3.0418	3.0418	3.0418	3.0418	3.0418	3.0418	3.0418	3.0418	3.0418	3.0418
1700063D05Rik	3.0418	3.0418	3.0418	3.0418	3.0418	3.39271	3.0418	3.0418	3.0418	3.0418	3.0418	3.0418	3.37071	3.45428	3.0418	3.0418	3.0418	3.0418	3.0418	3.0418	3.0418	3.0418	3.0418	3.0418	3.0418	3.0418	3.0418	3.0418	3.55793	3.0418	3.63087	4.4127	4.23421	3.98031	3.79057	3.0418	3.43815	3.54267	3.43477	3.0418	3.0418	3.0418	3.0418	3.0418	3.0418	3.43106	3.98954	3.70328	3.45704
1700063O14Rik	3.0418	3.0418	3.0418	3.0418	3.0418	3.0418	3.0418	3.0418	3.0418	3.0418	3.0418	3.0418	3.0418	3.0418	3.0418	3.0418	3.0418	3.0418	3.0418	3.0418	3.0418	3.0418	3.0418	3.0418	3.0418	3.0418	3.0418	3.0418	3.0418	3.0418	3.0418	3.0418	3.0418	3.0418	3.0418	3.0418	3.0418	3.0418	3.0418	3.0418	3.0418	3.0418	3.0418	3.0418	3.0418	3.0418	3.0418	3.0418	3.0418
1700064J06Rik	3.0418	3.0418	3.0418	3.0418	3.0418	3.0418	3.0418	3.0418	3.0418	3.0418	3.0418	3.0418	3.0418	3.0418	3.0418	3.0418	3.0418	3.0418	3.0418	3.0418	3.0418	3.0418	3.0418	3.0418	3.0418	3.0418	3.0418	3.0418	3.0418	3.0418	3.0418	3.0418	3.0418	3.0418	3.0418	3.0418	3.0418	3.0418	3.0418	3.0418	3.0418	3.0418	3.0418	3.0418	3.0418	3.0418	3.0418	3.0418	3.0418
1700064M15Rik	3.48085	3.78741	3.5089	3.0418	3.0418	3.39271	3.0418	3.0418	3.0418	3.0418	3.0418	3.0418	3.37071	3.45428	3.0418	3.31103	3.40864	3.32866	3.0418	3.45895	3.0418	3.35796	3.0418	3.0418	3.40429	3.44142	3.0418	3.0418	3.76793	3.0418	3.63087	3.0418	3.0418	3.0418	3.0418	3.65758	3.0418	3.54267	3.0418	3.88077	3.0418	3.0418	3.45728	3.55409	3.0418	3.0418	3.0418	3.0418	3.62704
1700065D16Rik	3.79656	3.78741	4.06899	4.02797	4.52663	4.67631	4.1954	4.34354	4.3291	4.17438	3.71101	4.41343	4.15577	4.03583	4.01116	4.09661	4.45581	4.12874	4.2768	3.45895	3.77702	3.80871	4.47538	4.35807	4.26393	3.83361	4.08162	4.16046	3.76793	4.12918	3.63087	4.35814	3.89661	3.9128	3.57419	3.90628	3.82725	4.14066	4.19352	3.88077	3.79861	4.23294	3.86444	3.55409	3.42512	3.43106	3.78108	3.84851	4.1898
1700065I16Rik	3.0418	3.0418	3.0418	3.0418	3.0418	3.0418	3.0418	3.0418	3.0418	3.0418	3.0418	3.0418	3.0418	3.0418	3.0418	3.0418	3.0418	3.0418	3.0418	3.0418	3.0418	3.0418	3.0418	3.0418	3.0418	3.0418	3.0418	3.0418	3.0418	3.0418	3.0418	3.0418	3.0418	3.0418	3.0418	3.0418	3.0418	3.0418	3.0418	3.0418	3.0418	3.0418	3.0418	3.0418	3.0418	3.0418	3.0418	3.0418	3.0418
1700065J11Rik	3.0418	3.0418	3.0418	3.0418	3.0418	3.0418	3.0418	3.0418	3.0418	3.0418	3.0418	3.0418	3.0418	3.0418	3.0418	3.0418	3.0418	3.0418	3.0418	3.0418	3.0418	3.0418	3.0418	3.0418	3.0418	3.0418	3.0418	3.0418	3.0418	3.0418	3.0418	3.0418	3.0418	3.0418	3.0418	3.0418	3.0418	3.0418	3.0418	3.53069	3.0418	3.0418	3.0418	3.0418	3.0418	3.0418	3.0418	3.0418	3.0418
1700065J18Rik	3.0418	3.0418	3.0418	3.0418	3.0418	3.0418	3.0418	3.0418	3.0418	3.0418	3.0418	3.0418	3.0418	3.0418	3.0418	3.0418	3.0418	3.0418	3.0418	3.0418	3.0418	3.0418	3.0418	3.0418	3.0418	3.0418	3.0418	3.0418	3.0418	3.0418	3.0418	3.0418	3.0418	3.40188	3.0418	3.0418	3.0418	3.0418	3.0418	3.0418	3.0418	3.0418	3.0418	3.0418	3.0418	3.0418	3.0418	3.0418	3.0418
1700065L07Rik	3.0418	3.0418	3.0418	3.0418	3.0418	3.0418	3.0418	3.0418	3.0418	3.0418	3.0418	3.0418	3.0418	3.0418	3.0418	3.0418	3.0418	3.0418	3.0418	3.0418	3.0418	3.0418	3.0418	3.0418	3.0418	3.0418	3.0418	3.0418	3.0418	3.0418	3.0418	3.0418	3.0418	3.0418	3.0418	3.0418	3.0418	3.0418	3.0418	3.0418	3.42345	3.0418	3.75658	3.55409	3.0418	3.0418	3.0418	3.0418	3.0418
1700065O20Rik	3.0418	3.0418	3.0418	3.0418	3.0418	3.0418	3.0418	3.0418	3.0418	3.0418	3.0418	3.0418	3.0418	3.0418	3.0418	3.0418	3.0418	3.0418	3.0418	3.0418	3.0418	3.0418	3.0418	3.0418	3.0418	3.0418	3.0418	3.0418	3.0418	3.0418	3.0418	3.0418	3.0418	3.0418	3.0418	3.0418	3.0418	3.54267	3.0418	3.0418	3.0418	3.0418	3.0418	3.0418	3.0418	3.0418	3.0418	3.0418	3.0418
1700066B17Rik	3.0418	3.0418	3.0418	3.0418	3.0418	3.0418	3.0418	3.0418	3.0418	3.0418	3.0418	3.0418	3.0418	3.0418	3.0418	3.0418	3.0418	3.0418	3.46464	3.0418	3.37344	3.0418	3.0418	3.41859	3.0418	3.0418	3.34794	3.0418	3.0418	3.0418	3.0418	3.0418	3.0418	3.0418	3.0418	3.0418	3.0418	3.54267	3.0418	3.0418	3.42345	3.53954	3.62738	3.0418	3.42512	3.59066	3.0418	3.0418	3.0418
1700066B19Rik	6.20881	6.46632	6.15482	6.42769	5.73556	5.45318	5.81111	5.65144	6.34423	6.19438	5.72996	5.80244	6.20131	5.71302	6.35298	6.10818	5.39789	4.99954	5.1981	5.05066	5.79335	5.77986	5.76654	5.83508	6.11526	6.06532	6.00387	6.21285	6.05715	6.55788	4.32541	6.12062	5.80578	5.94911	6.02988	5.60243	6.43232	5.73599	5.71931	6.47942	6.24527	5.85469	6.3638	5.32038	5.87252	6.43054	5.42236	5.86973	5.32912
1700066M21Rik	8.17537	8.29403	8.27073	8.22619	7.78355	7.9979	8.26672	8.26075	8.05396	8.05244	7.99051	7.8765	8.0668	8.22668	7.869	8.01816	7.70266	7.73112	7.74298	7.77677	7.59021	7.34139	7.72271	7.91305	8.16469	8.1299	7.86064	8.08341	8.44121	7.62626	8.40025	7.7265	7.81716	7.68219	8.06008	7.88903	8.06421	7.86881	8.23013	7.67404	7.49759	7.91238	7.62203	8.08883	7.82089	8.19522	7.66194	7.5194	7.65046
1700066N21Rik	3.0418	3.0418	3.5089	3.0418	3.0418	3.0418	3.0418	3.0418	3.0418	3.0418	3.0418	3.0418	3.0418	3.0418	3.0418	3.0418	3.0418	3.0418	3.0418	3.0418	3.0418	3.0418	3.0418	3.0418	3.0418	3.0418	3.0418	3.41288	3.0418	3.0418	3.0418	3.0418	3.0418	3.0418	3.0418	3.0418	3.0418	3.0418	3.0418	3.0418	3.0418	3.0418	3.45728	3.0418	3.0418	3.59066	3.0418	3.0418	3.0418
1700066O22Rik	3.0418	3.0418	3.0418	3.0418	3.0418	3.0418	3.0418	3.0418	3.0418	3.0418	3.0418	3.0418	3.0418	3.0418	3.0418	3.0418	3.0418	3.0418	3.0418	3.0418	3.0418	3.0418	3.0418	3.0418	3.0418	3.0418	3.0418	3.0418	3.0418	3.0418	3.0418	3.0418	3.0418	3.0418	3.0418	3.0418	3.0418	3.0418	3.0418	3.72997	3.0418	3.0418	3.0418	3.0418	3.0418	3.0418	3.0418	3.0418	3.0418
1700067G17Rik	3.0418	3.0418	3.0418	3.0418	3.0418	3.0418	3.0418	3.0418	3.0418	3.0418	3.0418	3.0418	3.0418	3.0418	3.0418	3.0418	3.0418	3.0418	3.0418	3.0418	3.0418	3.0418	3.0418	3.0418	3.0418	3.0418	3.0418	3.0418	3.0418	3.0418	3.0418	3.0418	3.5401	3.0418	3.0418	3.0418	3.0418	3.0418	3.0418	3.0418	3.0418	3.0418	3.0418	3.0418	3.0418	3.0418	3.0418	3.0418	3.0418
1700067K01Rik	4.88494	4.86474	4.64891	4.91778	4.91095	5.13349	5.32236	5.39621	5.13686	5.04122	3.98009	4.96504	5.42054	5.29048	5.05516	4.98093	4.94803	4.34477	5.13776	5.14369	4.20815	4.68642	4.61378	4.61044	5.37469	5.12408	4.89866	4.67805	5.02207	4.39939	3.86928	4.46461	4.62243	4.77624	4.72115	4.60569	5.21575	4.91991	4.63239	4.77391	5.01537	4.55349	4.58227	4.72811	4.59655	4.12082	5.19869	5.19542	4.71434
1700067P10Rik	3.0418	3.0418	3.0418	3.0418	3.0418	3.0418	3.0418	3.0418	3.0418	3.0418	3.0418	3.0418	3.0418	3.0418	3.0418	3.0418	3.0418	3.0418	3.0418	3.0418	3.0418	3.0418	3.0418	3.0418	3.0418	3.0418	3.0418	3.0418	3.0418	3.0418	3.0418	3.0418	3.0418	3.0418	3.0418	3.0418	3.0418	3.0418	3.0418	3.0418	3.0418	3.0418	3.0418	3.0418	3.0418	3.0418	3.0418	3.0418	3.0418
1700069L16Rik	3.0418	3.0418	3.0418	3.0418	3.0418	3.0418	3.0418	3.0418	3.0418	3.0418	3.0418	3.0418	3.0418	3.0418	3.0418	3.0418	3.0418	3.0418	3.0418	3.0418	3.0418	3.0418	3.0418	3.0418	3.0418	3.0418	3.0418	3.0418	3.0418	3.0418	3.0418	3.0418	3.0418	3.0418	3.0418	3.0418	3.0418	3.0418	3.0418	3.0418	3.0418	3.0418	3.0418	3.0418	3.0418	3.0418	3.0418	3.0418	3.0418
1700069P05Rik	3.0418	3.0418	3.0418	3.0418	3.0418	3.0418	3.0418	3.0418	3.0418	3.0418	3.0418	3.0418	3.0418	3.0418	3.0418	3.0418	3.0418	3.0418	3.0418	3.0418	3.0418	3.0418	3.0418	3.0418	3.0418	3.0418	3.0418	3.0418	3.0418	3.0418	3.0418	3.0418	3.0418	3.0418	3.0418	3.0418	3.0418	3.0418	3.0418	3.0418	3.0418	3.0418	3.0418	3.0418	3.0418	3.0418	3.0418	3.0418	3.0418
1700071K01Rik	3.0418	3.0418	3.0418	3.0418	3.84881	3.0418	3.74903	3.0418	3.64778	3.46455	3.0418	3.70711	3.50595	3.7515	3.0418	3.50677	3.40864	3.44682	3.0418	3.62972	3.37344	3.0418	3.53713	3.0418	3.0418	3.0418	3.0418	3.30456	3.76793	4.0188	3.63087	3.61891	3.74308	3.83887	3.0418	3.65758	3.72407	3.54267	3.91006	3.0418	3.42345	3.7423	3.62738	3.76258	3.0418	3.59066	3.64758	3.51157	3.86398
1700071M16Rik	3.0418	3.0418	3.0418	3.0418	3.0418	3.0418	3.0418	3.0418	3.0418	3.0418	3.0418	3.0418	3.0418	3.0418	3.0418	3.0418	3.0418	3.0418	3.0418	3.0418	3.37344	3.0418	3.0418	3.0418	3.0418	3.0418	3.0418	3.0418	3.0418	3.0418	3.0418	3.0418	3.0418	3.0418	3.0418	3.0418	3.0418	3.0418	3.0418	3.72997	3.0418	3.0418	3.0418	3.0418	3.0418	3.0418	3.0418	3.51157	3.0418
1700072B07Rik	3.0418	3.0418	3.0418	3.0418	3.0418	3.0418	3.0418	3.0418	3.0418	3.0418	3.0418	3.0418	3.0418	3.0418	3.0418	3.0418	3.0418	3.0418	3.0418	3.0418	3.0418	3.0418	3.0418	3.0418	3.0418	3.0418	3.34794	3.0418	3.0418	3.0418	3.0418	3.0418	3.0418	3.0418	3.0418	3.0418	3.0418	3.0418	3.0418	3.0418	3.0418	3.0418	3.0418	3.0418	3.0418	3.0418	3.0418	3.0418	3.0418
1700072O05Rik	3.0418	3.0418	3.0418	3.0418	3.0418	3.0418	3.0418	3.0418	3.0418	3.0418	3.0418	3.0418	3.0418	3.0418	3.0418	3.0418	3.0418	3.0418	3.0418	3.0418	3.0418	3.0418	3.0418	3.0418	3.0418	3.0418	3.0418	3.30456	3.0418	3.0418	3.0418	3.0418	3.0418	3.0418	3.0418	3.0418	3.0418	3.0418	3.0418	3.53069	3.0418	3.7423	3.0418	3.0418	3.0418	3.0418	3.0418	3.0418	3.0418
1700073E17Rik	3.0418	3.0418	3.0418	3.67269	4.05501	3.73856	4.03244	4.28064	4.11722	4.13775	4.34725	3.97471	4.15577	4.52433	4.21858	4.32038	3.40864	3.6791	4.05998	3.62972	4.11895	3.58724	4.31686	3.41859	3.55311	3.83361	3.94701	4.00813	4.27493	4.39939	4.43946	4.4127	4.02426	4.50934	4.2071	4.38063	4.51661	3.90095	4.59148	3.72997	3.57998	4.62081	4.11961	5.05845	3.70192	3.90206	4.53066	4.40595	5.04264
1700074H08Rik	3.0418	3.0418	3.0418	3.0418	3.0418	3.0418	3.0418	3.0418	3.0418	3.0418	3.0418	3.0418	3.0418	3.0418	3.0418	3.0418	3.0418	3.0418	3.0418	3.0418	3.0418	3.0418	3.0418	3.0418	3.0418	3.0418	3.0418	3.0418	3.0418	3.53725	3.0418	3.0418	3.0418	3.40188	3.0418	3.47886	3.43815	3.54267	3.43477	3.0418	3.0418	3.0418	3.0418	3.0418	3.0418	3.0418	3.78108	3.0418	3.45704
1700074P13Rik	3.48085	3.0418	3.0418	3.0418	3.0418	3.0418	3.39806	3.0418	3.0418	3.0418	3.0418	3.37666	3.0418	3.0418	3.39016	3.0418	3.0418	3.0418	3.46464	3.45895	3.37344	3.35796	3.0418	3.0418	3.40429	3.0418	3.0418	3.49566	3.0418	3.0418	3.0418	3.0418	3.0418	3.0418	3.0418	3.0418	3.43815	3.0418	3.0418	3.0418	3.42345	3.0418	3.0418	3.55409	3.0418	3.0418	3.0418	3.0418	3.0418
1700080E11Rik	3.0418	3.0418	3.0418	3.0418	3.0418	3.0418	3.0418	3.0418	3.0418	3.0418	3.0418	3.0418	3.0418	3.0418	3.0418	3.0418	3.0418	3.0418	3.0418	3.0418	3.0418	3.0418	3.0418	3.0418	3.0418	3.0418	3.0418	3.0418	3.0418	3.0418	3.0418	3.0418	3.0418	3.0418	3.0418	3.0418	3.0418	3.0418	3.0418	3.0418	3.0418	3.0418	3.0418	3.0418	3.0418	3.0418	3.0418	3.0418	3.0418
1700080N15Rik	3.0418	3.47545	3.0418	3.0418	3.0418	3.0418	3.0418	3.0418	3.0418	3.0418	3.0418	3.0418	3.0418	3.0418	3.0418	3.0418	3.0418	3.0418	3.0418	3.0418	3.0418	3.0418	3.0418	3.0418	3.0418	3.0418	3.0418	3.0418	3.0418	3.0418	3.0418	3.0418	3.0418	3.0418	3.0418	3.0418	3.0418	3.0418	3.0418	3.0418	3.0418	3.0418	3.0418	3.0418	3.0418	3.0418	3.0418	3.0418	3.0418
1700080O16Rik	3.0418	3.0418	3.0418	3.0418	3.0418	3.0418	3.0418	3.0418	3.0418	3.0418	3.0418	3.0418	3.0418	3.0418	3.0418	3.0418	3.0418	3.0418	3.0418	3.0418	3.0418	3.0418	3.0418	3.0418	3.0418	3.0418	3.0418	3.0418	3.0418	3.0418	3.0418	3.0418	3.0418	3.0418	3.0418	3.0418	3.0418	3.0418	3.0418	3.0418	3.0418	3.0418	3.0418	3.0418	3.0418	3.0418	3.0418	3.0418	3.45704
1700081H04Rik	3.0418	3.0418	3.0418	3.0418	3.0418	3.0418	3.0418	3.0418	3.0418	3.0418	3.0418	3.0418	3.0418	3.0418	3.0418	3.0418	3.0418	3.0418	3.0418	3.0418	3.0418	3.0418	3.0418	3.0418	3.0418	3.0418	3.0418	3.0418	3.0418	3.0418	3.0418	3.0418	3.0418	3.0418	3.0418	3.0418	3.0418	3.0418	3.0418	3.0418	3.0418	3.0418	3.0418	3.0418	3.0418	3.0418	3.0418	3.0418	3.0418
1700084C01Rik	3.0418	3.0418	3.0418	3.48967	3.0418	3.0418	3.0418	3.0418	3.0418	3.0418	3.0418	3.0418	3.0418	3.0418	3.0418	3.0418	3.0418	3.0418	3.46464	3.0418	3.0418	3.0418	3.0418	3.0418	3.0418	3.44142	3.0418	3.30456	3.55793	3.0418	3.63087	3.0418	3.0418	3.0418	3.0418	3.0418	3.0418	3.0418	3.0418	3.72997	3.0418	3.7423	3.0418	3.0418	3.0418	3.0418	3.47172	3.51157	3.0418
1700084E18Rik	4.09768	4.59446	4.59137	4.34594	3.76545	3.73856	3.74903	4.06321	4.26343	4.05977	3.0418	3.78404	4.15577	4.1825	4.26399	3.96019	3.99741	3.61273	3.63768	3.86768	4.20815	4.1561	3.73895	3.87509	3.9185	3.60516	4.19846	4.1026	4.05841	4.4757	4.32541	4.17442	4.3241	4.43148	3.95391	4.00486	4.13968	3.74667	4.13069	4.00621	4.16174	4.02319	4.53429	4.26617	4.33032	3.98149	4.07645	4.33287	4.04227
1700084F23Rik	3.0418	3.0418	3.0418	3.0418	3.0418	3.0418	3.0418	3.0418	3.0418	3.0418	3.0418	3.0418	3.0418	3.0418	3.0418	3.0418	3.0418	3.0418	3.0418	3.0418	3.0418	3.0418	3.0418	3.0418	3.0418	3.0418	3.0418	3.0418	3.0418	3.0418	3.0418	3.0418	3.0418	3.0418	3.0418	3.0418	3.0418	3.0418	3.0418	3.0418	3.0418	3.0418	3.0418	3.0418	3.0418	3.0418	3.0418	3.0418	3.45704
1700084J12Rik	3.0418	3.0418	3.0418	3.0418	3.55615	3.73856	3.54436	3.46602	3.0418	3.70672	3.0418	3.0418	3.37071	3.45428	3.39016	3.31103	3.0418	3.32866	3.0418	3.0418	3.50979	3.48803	3.53713	3.0418	3.40429	3.0418	3.34794	3.30456	3.0418	3.53725	3.0418	3.0418	3.0418	3.40188	3.57419	3.47886	3.0418	3.0418	3.43477	3.53069	3.0418	3.7423	3.0418	3.55409	3.42512	3.0418	3.78108	3.84851	3.62704
1700085C21Rik	3.0418	3.0418	3.0418	3.0418	3.0418	3.0418	3.0418	3.0418	3.0418	3.0418	3.0418	3.0418	3.0418	3.0418	3.0418	3.0418	3.0418	3.0418	3.0418	3.0418	3.0418	3.0418	3.0418	3.0418	3.0418	3.0418	3.0418	3.0418	3.0418	3.0418	3.0418	3.0418	3.0418	3.0418	3.0418	3.0418	3.0418	3.0418	3.0418	3.0418	3.0418	3.0418	3.0418	3.0418	3.0418	3.0418	3.0418	3.51157	3.45704
1700086L19Rik	3.0418	3.0418	3.0418	3.0418	3.0418	3.0418	3.0418	3.0418	3.0418	3.0418	3.0418	3.0418	3.0418	3.0418	3.39016	3.31103	3.0418	3.0418	3.0418	3.0418	3.0418	3.35796	3.0418	3.0418	3.0418	3.0418	3.0418	3.0418	3.0418	3.0418	3.0418	3.0418	3.0418	3.40188	3.0418	3.0418	3.0418	3.0418	3.0418	3.53069	3.42345	3.0418	3.0418	3.0418	3.0418	3.0418	3.0418	3.0418	3.0418
1700086O06Rik	6.25363	6.10244	6.50162	6.80565	6.37204	6.05243	6.16083	6.33801	5.91444	5.86779	6.36444	6.27689	6.46522	6.4631	6.20815	5.83991	5.86117	6.09586	5.89493	6.20534	5.9679	5.71433	6.23593	5.99986	6.32972	6.52418	5.87003	6.047	5.985	5.94169	4.19703	6.25445	6.52568	6.40545	6.65631	6.5924	6.49421	6.4904	6.75568	6.66865	6.55462	6.52296	6.38793	6.35312	6.11463	6.13741	6.76383	6.20338	6.81668
1700088E04Rik	3.0418	3.0418	3.0418	3.48967	3.0418	3.0418	3.0418	3.0418	3.34646	3.0418	3.0418	3.0418	3.0418	3.0418	3.0418	3.0418	3.0418	3.0418	3.46464	3.0418	3.0418	3.0418	3.0418	3.0418	3.0418	3.0418	3.0418	3.0418	3.0418	3.0418	3.63087	3.0418	3.0418	3.54972	3.79057	3.47886	3.0418	3.0418	3.0418	3.0418	3.0418	3.0418	3.62738	3.76258	3.0418	3.0418	3.47172	3.0418	3.0418
1700091H14Rik	3.0418	3.0418	3.0418	3.0418	3.0418	3.0418	3.0418	3.0418	3.0418	3.0418	3.0418	3.0418	3.0418	3.0418	3.0418	3.0418	3.0418	3.0418	3.0418	3.0418	3.0418	3.0418	3.0418	3.0418	3.0418	3.0418	3.0418	3.0418	3.0418	3.0418	3.0418	3.0418	3.0418	3.0418	3.0418	3.0418	3.0418	3.0418	3.0418	3.0418	3.0418	3.0418	3.0418	3.0418	3.0418	3.0418	3.0418	3.0418	3.0418
1700092C02Rik	3.0418	3.0418	3.0418	3.0418	3.0418	3.0418	3.0418	3.0418	3.0418	3.0418	3.0418	3.0418	3.0418	3.0418	3.0418	3.0418	3.0418	3.0418	3.0418	3.0418	3.0418	3.0418	3.0418	3.0418	3.0418	3.0418	3.34794	3.0418	3.0418	3.0418	3.0418	3.0418	3.0418	3.0418	3.0418	3.0418	3.0418	3.0418	3.0418	3.0418	3.0418	3.0418	3.0418	3.0418	3.0418	3.0418	3.0418	3.0418	3.0418
1700092C10Rik	3.48085	3.0418	3.0418	3.0418	3.40646	3.0418	3.0418	3.0418	3.0418	3.34126	3.0418	3.0418	3.0418	3.0418	3.39016	3.0418	3.0418	3.0418	3.63768	3.45895	3.0418	3.0418	3.53713	3.0418	3.0418	3.60516	3.34794	3.30456	3.55793	3.0418	3.0418	3.0418	3.0418	3.0418	3.0418	3.0418	3.0418	3.54267	3.0418	3.0418	3.0418	3.53954	3.0418	3.0418	3.0418	3.0418	3.0418	3.0418	3.0418
1700092E19Rik	3.0418	3.0418	3.0418	3.0418	3.0418	3.0418	3.0418	3.0418	3.0418	3.0418	3.0418	3.0418	3.0418	3.0418	3.0418	3.0418	3.0418	3.0418	3.0418	3.0418	3.37344	3.0418	3.0418	3.0418	3.0418	3.0418	3.0418	3.30456	3.0418	3.0418	3.0418	3.0418	3.0418	3.0418	3.0418	3.0418	3.0418	3.0418	3.0418	3.0418	3.0418	3.0418	3.0418	3.0418	3.0418	3.0418	3.0418	3.0418	3.0418
1700092K14Rik	3.0418	3.0418	3.0418	3.0418	3.0418	3.0418	3.0418	3.0418	3.0418	3.0418	3.0418	3.0418	3.0418	3.0418	3.0418	3.0418	3.0418	3.0418	3.0418	3.0418	3.0418	3.0418	3.0418	3.0418	3.0418	3.0418	3.0418	3.0418	3.0418	3.0418	3.0418	3.0418	3.0418	3.0418	3.0418	3.0418	3.0418	3.0418	3.0418	3.0418	3.42345	3.0418	3.0418	3.0418	3.0418	3.59066	3.0418	3.0418	3.0418
1700092M07Rik	5.26818	5.35955	5.148	5.39434	5.01608	4.87464	4.56706	4.61207	4.2968	4.36924	4.83411	5.00852	4.89044	4.96552	4.30742	4.39285	4.67794	4.22722	4.74206	4.72132	4.43571	4.1561	4.67714	4.35807	4.59157	4.57255	4.26906	4.16046	4.7396	4.61412	4.04864	4.35814	4.68608	4.8901	4.40689	5.13345	4.86568	5.11105	5.19996	4.82804	4.77189	4.80216	4.67256	4.66313	4.59655	4.53591	4.89017	4.91031	4.87113
1700093K21Rik	3.0418	3.0418	3.0418	3.0418	3.40646	3.0418	3.39806	3.0418	3.47186	3.34126	3.0418	3.37666	3.37071	3.0418	3.64229	3.50677	3.40864	3.32866	3.46464	3.62972	3.37344	3.74323	3.0418	3.0418	3.40429	3.0418	3.57008	3.49566	3.76793	3.0418	3.0418	3.0418	3.0418	3.0418	3.57419	3.0418	3.0418	3.54267	3.71833	3.88077	3.88559	3.53954	3.75658	3.0418	3.0418	3.59066	3.0418	3.0418	3.45704
1700094D03Rik	6.75589	6.72505	6.33884	6.44116	6.41782	6.7201	6.79113	6.86164	6.67324	6.64654	6.65221	6.65061	6.54775	6.8262	6.702	6.70606	6.44999	6.41924	6.45381	6.36112	6.67115	6.52309	6.36298	6.5588	6.61995	6.64914	6.35569	6.56019	7.10246	6.88141	7.90883	7.35422	7.33903	7.16354	7.30216	7.15399	7.15951	6.87228	7.2292	7.01753	7.07464	7.09543	6.80925	6.75735	6.85655	6.9316	7.39084	7.06613	7.1537
1700094J05Rik	3.48085	3.65281	3.69955	3.48967	3.55615	3.73856	3.74903	3.97733	3.64778	3.34126	3.71101	3.70711	3.77107	3.7515	3.53327	3.74806	3.67382	3.6791	3.63768	3.75942	3.50979	3.74323	3.0418	3.0418	3.55311	3.60516	3.57008	3.62615	3.0418	3.53725	3.0418	3.45123	4.02426	3.75649	4.2071	3.79319	3.82725	3.54267	3.71833	3.0418	3.69906	4.02319	3.45728	3.0418	3.42512	3.81346	3.89244	3.0418	3.0418
1700094M24Rik	3.0418	3.0418	3.0418	3.0418	3.0418	3.0418	3.0418	3.0418	3.0418	3.0418	3.0418	3.0418	3.0418	3.0418	3.0418	3.0418	3.0418	3.0418	3.0418	3.0418	3.0418	3.0418	3.0418	3.0418	3.0418	3.0418	3.0418	3.0418	3.0418	3.0418	3.0418	3.0418	3.0418	3.0418	3.0418	3.0418	3.0418	3.0418	3.0418	3.0418	3.0418	3.0418	3.0418	3.0418	3.0418	3.0418	3.0418	3.0418	3.0418
1700095A21Rik	3.48085	3.0418	3.0418	3.0418	3.0418	3.0418	3.0418	3.0418	3.0418	3.0418	3.0418	3.0418	3.0418	3.0418	3.0418	3.0418	3.0418	3.0418	3.0418	3.0418	3.0418	3.0418	3.0418	3.0418	3.0418	3.0418	3.34794	3.0418	3.0418	3.0418	3.0418	3.61891	3.0418	3.0418	3.0418	3.0418	3.0418	3.0418	3.0418	3.0418	3.0418	3.0418	3.0418	3.0418	3.0418	3.0418	3.0418	3.0418	3.0418
1700095B10Rik	3.0418	3.0418	3.0418	3.0418	3.0418	3.0418	3.0418	3.0418	3.0418	3.0418	3.0418	3.0418	3.0418	3.0418	3.0418	3.0418	3.0418	3.0418	3.0418	3.0418	3.0418	3.0418	3.0418	3.0418	3.0418	3.0418	3.0418	3.0418	3.0418	3.0418	3.0418	3.0418	3.0418	3.0418	3.0418	3.0418	3.0418	3.0418	3.0418	3.0418	3.0418	3.0418	3.62738	3.55409	3.0418	3.0418	3.0418	3.0418	3.0418
1700096J18Rik	3.0418	3.65281	3.0418	3.67269	3.99191	3.53686	3.54436	3.63962	3.83915	3.97417	3.0418	3.61924	3.60906	3.85862	3.64229	3.64038	3.55921	3.61273	3.63768	3.75942	3.77702	3.80871	3.53713	3.69079	3.55311	3.0418	3.65069	3.49566	3.76793	3.89182	4.43946	3.94554	3.5401	3.66229	3.57419	4.00486	3.72407	4.14066	3.99018	3.88077	3.0418	3.53954	3.62738	3.76258	3.58233	3.0418	3.89244	3.51157	3.86398
1700096K18Rik	4.71024	4.82371	5.28981	5.21102	4.36319	4.43718	4.33451	4.06321	4.55715	4.6306	4.49006	4.44833	3.90114	4.61781	4.50095	4.39285	4.45581	4.28771	4.60736	4.12378	4.97056	4.37473	3.89162	4.78495	4.44018	4.27193	4.03907	4.6607	4.27493	4.61412	5.3673	4.7338	5.01015	4.94332	5.07651	4.31616	4.83158	4.69384	4.91694	4.45796	4.73774	5.14328	4.75638	4.95779	4.90685	5.27991	4.67861	4.65732	4.94258
1700097N02Rik	4.75635	4.54264	4.8063	4.64114	3.76545	3.73856	3.54436	3.88141	5.38383	5.07407	3.0418	3.78404	3.90114	3.85862	4.91372	4.76596	4.60861	4.4503	4.13797	3.62972	5.81641	5.84241	3.89162	4.20494	3.55311	3.83361	5.12945	4.93998	4.86047	4.4757	5.02149	4.35814	4.13521	5.24354	4.72115	4.09306	5.49136	3.90095	4.25248	5.15254	4.32499	4.32274	4.58227	4.26617	4.47154	5.18258	3.98954	3.84851	4.71434
1700100L14Rik	3.0418	3.0418	3.0418	3.0418	3.0418	3.0418	3.0418	3.0418	3.0418	3.0418	3.0418	3.0418	3.0418	3.0418	3.0418	3.31103	3.0418	3.0418	3.0418	3.0418	3.0418	3.0418	3.0418	3.0418	3.0418	3.0418	3.0418	3.0418	3.0418	3.0418	3.0418	3.0418	3.0418	3.0418	3.0418	3.0418	3.43815	3.0418	3.0418	3.0418	3.0418	3.0418	3.0418	3.0418	3.0418	3.0418	3.0418	3.51157	3.0418
1700101E01Rik	3.66036	3.47545	3.96428	3.67269	4.05501	4.01804	3.65579	3.77143	4.72451	4.30839	4.18146	3.9163	4.199	3.45428	4.50095	4.54499	4.45581	4.05673	3.76908	3.86768	5.35906	5.29887	4.01857	3.95219	3.76121	4.14837	4.51103	4.38504	4.05841	4.31715	3.0418	4.56158	4.23421	4.58208	4.08947	3.90628	3.43815	3.90095	3.82067	4.00621	4.10049	3.89567	4.19043	3.92015	4.16646	4.44655	3.47172	4.07468	3.95803
1700101I11Rik	3.48085	3.78741	3.69955	3.92718	3.0418	3.64666	3.54436	3.77143	3.34646	3.46455	3.0418	3.61924	3.50595	3.62318	3.0418	3.57794	3.7697	3.6791	3.46464	3.62972	3.0418	3.35796	3.89162	3.69079	3.55311	3.44142	3.34794	3.49566	3.55793	3.73911	3.0418	3.74631	3.74308	3.75649	3.79057	4.00486	3.72407	3.90095	3.59585	4.1153	4.27351	3.7423	3.75658	3.92015	3.0418	3.0418	4.07645	3.70328	3.95803
1700101O22Rik	3.0418	3.0418	3.5089	3.0418	3.0418	3.0418	3.0418	3.0418	3.0418	3.0418	3.0418	3.0418	3.0418	3.45428	3.0418	3.0418	3.0418	3.0418	3.0418	3.45895	3.0418	3.0418	3.0418	3.0418	3.0418	3.0418	3.34794	3.0418	3.0418	3.0418	3.0418	3.0418	3.0418	3.0418	3.0418	3.0418	3.0418	3.0418	3.0418	3.0418	3.0418	3.0418	3.0418	3.0418	3.0418	3.0418	3.0418	3.0418	3.0418
1700102H20Rik	4.17829	3.47545	3.96428	4.47368	3.84881	3.95709	4.457	3.97733	3.98985	3.82584	3.71101	3.70711	3.95861	4.11213	3.64229	3.92228	3.99741	4.01839	4.13797	3.86768	3.77702	3.6704	4.01857	3.57317	3.84411	4.52787	3.84295	3.97417	3.92661	3.73911	4.19703	3.85269	3.74308	3.98031	3.0418	4.00486	3.99809	3.90095	4.41107	3.88077	4.10049	4.40529	4.11961	4.52109	4.03899	4.12082	3.64758	4.47433	4.25569
1700102P08Rik	4.17829	4.3708	4.16255	4.64114	4.448	4.51086	4.60147	4.70378	4.3291	4.39838	3.71101	4.37736	4.61135	4.30945	4.72525	4.3451	4.67794	4.39885	4.05998	4.67854	4.40108	4.43834	4.31686	4.61044	4.44018	4.14837	4.30256	4.16046	4.60506	4.12918	5.31564	4.02871	4.3241	4.2562	4.31189	4.60569	4.68465	4.56231	4.54904	4.52855	4.37401	4.40529	4.79618	3.55409	4.37952	4.69583	4.72401	4.86376	4.1898
1700104L18Rik	3.0418	3.0418	3.0418	3.0418	3.0418	3.0418	3.0418	3.0418	3.0418	3.0418	3.0418	3.0418	3.0418	3.0418	3.0418	3.0418	3.0418	3.0418	3.0418	3.0418	3.0418	3.0418	3.0418	3.0418	3.0418	3.0418	3.0418	3.0418	3.0418	3.0418	3.0418	3.0418	3.0418	3.0418	3.0418	3.0418	3.0418	3.0418	3.0418	3.0418	3.0418	3.0418	3.0418	3.0418	3.0418	3.0418	3.0418	3.0418	3.0418
1700105P06Rik	3.0418	3.89967	3.5089	3.81149	3.67012	3.0418	3.54436	3.0418	3.64778	3.34126	3.0418	3.37666	3.50595	3.62318	3.0418	3.42199	3.40864	3.0418	3.0418	3.0418	3.8455	3.58724	3.0418	3.69079	3.55311	3.60516	3.0418	3.30456	3.0418	3.0418	3.0418	3.45123	3.5401	3.40188	3.57419	3.65758	3.0418	3.0418	3.43477	4.00621	3.57998	3.53954	3.62738	3.0418	3.42512	3.0418	3.47172	3.51157	3.0418
1700106J16Rik	3.0418	3.47545	3.5089	3.48967	3.0418	3.39271	3.0418	3.0418	3.47186	3.0418	3.0418	3.0418	3.50595	3.45428	3.0418	3.31103	3.40864	3.32866	3.0418	3.0418	3.0418	3.0418	3.0418	3.0418	3.0418	3.60516	3.0418	3.0418	3.0418	3.0418	3.0418	3.0418	3.0418	3.0418	3.0418	3.0418	3.43815	3.0418	3.0418	3.72997	3.0418	3.7423	3.0418	3.0418	3.0418	3.0418	3.78108	3.0418	3.0418
1700108F19Rik	3.0418	3.0418	3.0418	3.0418	3.0418	3.0418	3.0418	3.0418	3.0418	3.0418	3.0418	3.0418	3.37071	3.0418	3.0418	3.0418	3.0418	3.0418	3.0418	3.45895	3.0418	3.0418	3.0418	3.0418	3.0418	3.0418	3.34794	3.30456	3.0418	3.0418	3.0418	3.0418	3.0418	3.40188	3.0418	3.0418	3.0418	3.0418	3.0418	3.53069	3.0418	3.0418	3.0418	3.55409	3.0418	3.0418	3.0418	3.0418	3.45704
1700108J01Rik	3.48085	3.47545	3.69955	3.0418	3.40646	3.0418	3.65579	3.77143	3.71809	3.70672	3.0418	3.37666	3.69544	3.0418	3.53327	3.79578	3.67382	3.44682	3.63768	3.0418	3.37344	3.0418	3.73895	3.57317	3.0418	3.83361	3.0418	3.41288	3.0418	3.53725	3.0418	3.45123	3.74308	3.66229	3.95391	3.0418	3.60058	3.0418	3.59585	3.72997	3.0418	4.02319	3.45728	3.0418	3.0418	3.0418	3.47172	3.51157	3.0418
1700109G14Rik	3.0418	3.0418	3.0418	3.0418	3.0418	3.0418	3.0418	3.0418	3.0418	3.0418	3.0418	3.0418	3.37071	3.0418	3.0418	3.0418	3.0418	3.32866	3.0418	3.0418	3.37344	3.0418	3.0418	3.0418	3.0418	3.0418	3.34794	3.30456	3.0418	3.0418	3.0418	3.0418	3.0418	3.40188	3.0418	3.0418	3.0418	3.0418	3.0418	3.53069	3.0418	3.0418	3.0418	3.0418	3.0418	3.0418	3.0418	3.0418	3.0418
1700109G15Rik	3.0418	3.0418	3.0418	3.0418	3.0418	3.0418	3.0418	3.0418	3.0418	3.0418	3.0418	3.0418	3.0418	3.0418	3.0418	3.0418	3.0418	3.0418	3.0418	3.0418	3.0418	3.0418	3.0418	3.0418	3.0418	3.0418	3.0418	3.0418	3.0418	3.0418	3.0418	3.0418	3.0418	3.0418	3.0418	3.0418	3.0418	3.0418	3.0418	3.0418	3.0418	3.0418	3.0418	3.0418	3.0418	3.0418	3.0418	3.0418	3.45704
1700109H08Rik	5.14166	4.78126	4.98871	4.47368	5.51298	5.56538	5.90091	6.03652	5.34348	5.62289	5.38926	5.51531	5.85442	5.71302	5.66789	5.58908	5.57599	5.47053	5.78502	5.38855	5.62011	5.25241	5.43746	5.48867	5.7229	5.82285	5.39326	5.17945	5.93474	5.04675	5.79761	6.01871	5.93076	5.89918	5.77965	5.62552	6.53403	5.38968	5.9995	5.19283	4.95883	5.34117	5.13644	5.35937	5.20368	5.57342	5.70049	5.04038	5.04264
1700109I08Rik	3.0418	3.0418	3.0418	3.0418	3.0418	3.0418	3.0418	3.0418	3.0418	3.0418	3.0418	3.0418	3.0418	3.0418	3.0418	3.0418	3.0418	3.0418	3.0418	3.0418	3.0418	3.0418	3.0418	3.0418	3.0418	3.0418	3.0418	3.0418	3.0418	3.0418	3.0418	3.0418	3.0418	3.0418	3.0418	3.0418	3.0418	3.0418	3.0418	3.0418	3.0418	3.0418	3.0418	3.0418	3.0418	3.0418	3.0418	3.0418	3.0418
1700109K24Rik	3.66036	3.0418	3.69955	3.0418	3.0418	3.0418	3.0418	3.0418	3.0418	3.0418	3.0418	3.0418	3.37071	3.45428	3.0418	3.31103	3.0418	3.0418	3.63768	3.45895	3.37344	3.0418	3.0418	3.0418	3.0418	3.0418	3.34794	3.30456	3.55793	3.0418	3.0418	3.0418	3.74308	3.75649	3.0418	3.0418	3.43815	3.54267	3.0418	3.0418	3.0418	3.0418	3.62738	3.0418	3.0418	3.0418	3.0418	3.51157	3.0418
1700110C19Rik	3.0418	3.0418	3.0418	3.0418	3.0418	3.0418	3.0418	3.0418	3.0418	3.0418	3.0418	3.0418	3.0418	3.0418	3.0418	3.0418	3.0418	3.0418	3.0418	3.0418	3.0418	3.0418	3.0418	3.0418	3.0418	3.0418	3.0418	3.0418	3.55793	3.53725	3.63087	3.61891	3.89661	3.40188	3.0418	3.47886	3.0418	3.54267	3.59585	3.0418	3.0418	3.0418	3.0418	3.0418	3.0418	3.0418	3.47172	3.70328	3.45704
1700110I01Rik	3.0418	3.0418	3.0418	3.0418	3.0418	3.0418	3.0418	3.0418	3.0418	3.0418	3.0418	3.0418	3.0418	3.0418	3.0418	3.0418	3.0418	3.0418	3.0418	3.0418	3.0418	3.0418	3.0418	3.0418	3.0418	3.0418	3.0418	3.0418	3.0418	3.0418	3.0418	3.0418	3.0418	3.0418	3.0418	3.0418	3.0418	3.0418	3.0418	3.0418	3.0418	3.0418	3.0418	3.0418	3.0418	3.0418	3.0418	3.0418	3.0418
1700110K17Rik	4.66226	4.48831	4.53078	4.78738	4.36319	4.67631	4.56706	4.34354	3.64778	3.34126	5.10176	4.66595	4.66722	4.42228	3.73356	4.18674	4.32526	4.19551	4.20988	4.04673	3.90809	4.11432	4.67714	4.35807	4.35579	3.92439	3.72133	3.68106	3.92661	4.0188	3.0418	4.1045	4.62243	4.58208	5.17572	4.24734	4.07172	4.49035	5.53485	3.53069	4.27351	4.23294	3.95855	4.66313	3.80188	3.98149	5.39638	4.76498	3.62704
1700111N16Rik	3.0418	3.0418	3.0418	3.0418	3.0418	3.0418	3.0418	3.0418	3.0418	3.0418	3.0418	3.0418	3.0418	3.0418	3.0418	3.0418	3.0418	3.0418	3.0418	3.0418	3.0418	3.0418	3.0418	3.0418	3.0418	3.0418	3.0418	3.0418	3.0418	3.0418	3.0418	3.0418	3.0418	3.0418	3.0418	3.0418	3.0418	3.0418	3.0418	3.0418	3.0418	3.0418	3.0418	3.0418	3.0418	3.0418	3.47172	3.0418	3.0418
1700112E06Rik	3.0418	3.0418	3.0418	3.0418	3.0418	3.0418	3.39806	3.0418	3.34646	3.0418	3.0418	3.0418	3.0418	3.0418	3.0418	3.0418	3.0418	3.32866	3.0418	3.45895	3.0418	3.6704	3.0418	3.0418	3.40429	3.0418	3.0418	3.0418	3.0418	3.0418	3.0418	3.45123	3.0418	3.40188	3.95391	3.0418	3.0418	3.0418	3.0418	3.53069	3.42345	3.53954	3.45728	3.0418	3.0418	3.0418	3.0418	3.0418	3.0418
1700112H15Rik	3.0418	3.0418	3.0418	3.0418	3.0418	3.0418	3.0418	3.0418	3.0418	3.0418	3.0418	3.0418	3.0418	3.0418	3.0418	3.0418	3.0418	3.0418	3.0418	3.0418	3.0418	3.0418	3.0418	3.0418	3.0418	3.0418	3.0418	3.0418	3.0418	3.0418	3.0418	3.0418	3.0418	3.0418	3.0418	3.0418	3.43815	3.0418	3.0418	3.0418	3.0418	3.0418	3.0418	3.0418	3.0418	3.0418	3.47172	3.0418	3.0418
1700112J05Rik	3.0418	3.47545	3.0418	3.0418	3.40646	3.39271	3.65579	3.77143	3.34646	3.46455	3.0418	3.61924	3.69544	3.45428	3.39016	3.31103	3.55921	3.0418	3.76908	3.62972	3.50979	3.0418	3.53713	3.41859	3.40429	3.0418	3.0418	3.0418	3.0418	3.53725	3.0418	3.61891	3.5401	3.40188	3.0418	3.0418	3.0418	3.0418	3.0418	3.72997	3.0418	3.0418	3.62738	3.55409	3.42512	3.0418	3.47172	3.0418	3.45704
1700113A16Rik	5.32714	5.18368	5.50642	5.50389	6.19375	6.38745	6.25073	6.48518	6.58117	6.35534	6.72828	6.26848	6.14915	6.28459	6.30929	6.45763	6.64146	6.49499	6.23688	6.0609	6.7141	6.68325	6.23593	6.22653	6.2112	6.02295	6.34905	6.40423	6.81777	6.3808	9.45103	6.43403	6.98943	6.44907	7.01537	6.65961	6.80164	6.68705	6.83594	7.15968	6.7934	6.96377	6.5569	6.60915	6.74234	6.59385	6.5291	6.59711	6.79889
1700113H08Rik	3.0418	3.0418	3.0418	3.48967	3.0418	3.0418	3.0418	3.0418	3.0418	3.0418	3.0418	3.0418	3.0418	3.0418	3.0418	3.31103	3.0418	3.0418	3.0418	3.0418	3.0418	3.0418	3.0418	3.0418	3.0418	3.0418	3.0418	3.0418	3.0418	3.0418	3.0418	3.0418	3.0418	3.0418	3.0418	3.0418	3.0418	3.0418	3.0418	3.0418	3.0418	3.0418	3.45728	3.0418	3.0418	3.0418	3.0418	3.0418	3.0418
1700119H24Rik	3.0418	3.0418	3.0418	3.0418	3.0418	3.0418	3.0418	3.0418	3.0418	3.0418	3.0418	3.0418	3.0418	3.0418	3.0418	3.0418	3.0418	3.0418	3.0418	3.0418	3.0418	3.0418	3.0418	3.0418	3.0418	3.0418	3.0418	3.0418	3.0418	3.0418	3.0418	3.0418	3.0418	3.0418	3.57419	3.0418	3.0418	3.0418	3.0418	3.0418	3.0418	3.0418	3.0418	3.0418	3.0418	3.0418	3.0418	3.0418	3.0418
1700120C14Rik	3.91013	3.65281	3.5089	3.67269	3.0418	3.73856	3.65579	3.77143	3.56755	3.46455	3.0418	3.97471	3.83903	3.62318	3.88511	3.74806	3.85353	3.53704	3.46464	3.45895	3.70079	4.02447	3.73895	3.41859	3.55311	3.92439	3.57008	3.56516	3.76793	3.73911	3.63087	3.61891	4.02426	3.54972	3.0418	3.90628	3.82725	4.0292	3.59585	3.0418	3.88559	3.0418	3.75658	3.0418	3.88922	3.71203	3.89244	3.51157	3.95803
1700120E14Rik	3.0418	3.0418	3.0418	3.0418	3.0418	3.0418	3.0418	3.0418	3.0418	3.0418	3.0418	3.0418	3.0418	3.0418	3.0418	3.0418	3.0418	3.0418	3.0418	3.0418	3.0418	3.0418	3.0418	3.0418	3.0418	3.0418	3.0418	3.0418	3.0418	3.0418	3.0418	3.0418	3.0418	3.0418	3.0418	3.0418	3.0418	3.0418	3.0418	3.0418	3.0418	3.0418	3.45728	3.0418	3.0418	3.0418	3.47172	3.0418	3.0418
1700120G07Rik	3.0418	3.0418	3.0418	3.0418	3.0418	3.0418	3.0418	3.0418	3.0418	3.0418	3.0418	3.0418	3.0418	3.0418	3.0418	3.0418	3.0418	3.0418	3.0418	3.0418	3.0418	3.0418	3.0418	3.0418	3.0418	3.0418	3.0418	3.0418	3.0418	3.0418	3.0418	3.45123	3.0418	3.0418	3.0418	3.0418	3.0418	3.0418	3.59585	3.0418	3.0418	3.0418	3.0418	3.0418	3.0418	3.43106	3.0418	3.0418	3.45704
1700120K04Rik	4.17829	4.16488	4.16255	4.64114	4.70215	4.7364	4.75969	5.08023	4.44912	4.42674	5.0187	4.69392	4.35505	4.82314	4.42769	4.46066	4.6438	4.63501	4.82405	4.58798	4.70661	4.71094	4.99986	4.84819	4.5556	4.65696	4.45549	4.71199	4.36751	4.4757	4.88185	4.7338	4.23421	4.39035	4.49409	4.49889	4.37153	4.69384	4.63239	4.21267	4.42084	4.80216	4.25635	4.05106	4.59655	4.69583	4.63138	4.16871	4.58145
1700121L16Rik	3.0418	3.0418	3.0418	3.0418	3.0418	3.0418	3.0418	3.0418	3.0418	3.0418	3.0418	3.0418	3.0418	3.0418	3.0418	3.0418	3.0418	3.0418	3.0418	3.0418	3.0418	3.0418	3.0418	3.0418	3.0418	3.0418	3.0418	3.0418	3.0418	3.0418	3.0418	3.45123	3.0418	3.0418	3.0418	3.0418	3.0418	3.0418	3.0418	3.0418	3.0418	3.0418	3.0418	3.0418	3.0418	3.0418	3.0418	3.0418	3.0418
1700121N20Rik	3.0418	3.0418	3.0418	3.0418	3.0418	3.0418	3.39806	3.46602	3.0418	3.0418	3.0418	3.0418	3.0418	3.45428	3.0418	3.0418	3.0418	3.0418	3.0418	3.0418	3.0418	3.0418	3.0418	3.0418	3.0418	3.60516	3.0418	3.41288	3.0418	3.0418	3.0418	3.0418	3.0418	3.0418	3.0418	3.0418	3.0418	3.0418	3.0418	3.0418	3.0418	3.0418	3.0418	3.0418	3.0418	3.0418	3.47172	3.0418	3.45704
1700122O11Rik	3.0418	3.0418	3.0418	3.0418	3.0418	3.0418	3.0418	3.0418	3.0418	3.0418	3.0418	3.0418	3.0418	3.0418	3.0418	3.0418	3.0418	3.0418	3.0418	3.0418	3.0418	3.0418	3.0418	3.0418	3.0418	3.0418	3.0418	3.0418	3.0418	3.0418	3.0418	3.45123	3.5401	3.83887	3.79057	3.47886	3.0418	3.0418	3.59585	3.0418	3.0418	3.0418	3.0418	3.0418	3.0418	3.0418	3.47172	3.0418	3.45704
1700123I01Rik	3.0418	3.0418	3.0418	3.0418	3.0418	3.0418	3.0418	3.0418	3.0418	3.0418	3.0418	3.0418	3.0418	3.0418	3.0418	3.0418	3.0418	3.0418	3.0418	3.0418	3.0418	3.0418	3.0418	3.0418	3.0418	3.0418	3.0418	3.0418	3.0418	3.0418	3.0418	3.0418	3.0418	3.40188	3.0418	3.0418	3.43815	3.0418	3.0418	3.0418	3.0418	3.7423	3.0418	3.0418	3.0418	3.0418	3.0418	3.0418	3.0418
1700123K08Rik	3.0418	3.0418	3.0418	3.0418	3.0418	3.0418	3.0418	3.0418	3.0418	3.0418	3.0418	3.0418	3.0418	3.0418	3.0418	3.0418	3.0418	3.0418	3.0418	3.0418	3.0418	3.0418	3.0418	3.0418	3.0418	3.0418	3.0418	3.0418	3.0418	3.0418	3.0418	3.0418	3.0418	3.0418	3.0418	3.0418	3.0418	3.0418	3.0418	3.0418	3.0418	3.0418	3.0418	3.0418	3.0418	3.0418	3.0418	3.0418	3.0418
1700123L14Rik	3.0418	3.0418	3.0418	3.0418	3.40646	3.0418	3.0418	3.88141	3.0418	3.34126	3.0418	3.37666	3.0418	3.62318	3.0418	3.42199	3.0418	3.0418	3.46464	3.0418	3.0418	3.0418	3.0418	3.41859	3.0418	3.0418	3.34794	3.30456	3.0418	3.0418	3.0418	3.0418	3.0418	3.40188	3.0418	3.0418	3.43815	3.0418	3.43477	3.0418	3.0418	3.0418	3.0418	3.55409	3.0418	3.0418	3.0418	3.0418	3.62704
1700123M08Rik	4.80074	4.23838	5.18492	4.78738	4.70215	4.54594	4.84542	4.90627	4.90998	5.00749	4.73025	4.57776	4.74633	4.82314	4.78215	5.13975	4.94803	5.04601	4.82405	4.43689	5.0742	4.78162	4.79448	4.93733	4.78669	4.57255	4.79715	4.6431	5.11936	4.8495	4.63702	5.42408	5.22813	5.15839	5.71731	5.19807	4.76037	5.06589	5.19996	5.26985	5.28838	5.82927	5.10624	5.00912	5.29669	5.18258	5.42236	5.04038	5.68825
1700123O12Rik	3.0418	3.0418	3.0418	3.0418	3.0418	3.0418	3.0418	3.0418	3.0418	3.0418	3.0418	3.0418	3.0418	3.0418	3.0418	3.0418	3.0418	3.0418	3.0418	3.0418	3.0418	3.0418	3.0418	3.0418	3.0418	3.0418	3.0418	3.0418	3.0418	3.0418	3.63087	3.0418	3.0418	3.0418	3.0418	3.0418	3.0418	3.0418	3.0418	3.0418	3.0418	3.0418	3.0418	3.0418	3.0418	3.0418	3.47172	3.0418	3.0418
1700123O20Rik	9.5662	9.65694	9.72052	9.6618	8.7011	8.76141	8.80203	8.85529	8.68455	8.76039	8.52376	8.72516	8.67066	8.91278	8.70809	8.64999	8.77347	8.75428	8.71034	8.72312	8.54283	8.42732	8.84985	8.66367	8.81411	8.87367	8.54104	8.86364	9.177	9.14614	9.54276	9.42506	9.33412	9.36837	9.16877	9.40069	9.39869	9.50826	9.33379	9.05507	9.35822	8.97275	9.32532	9.16376	9.08701	8.88363	9.30604	9.23398	9.63298
1700123O21Rik	3.0418	3.0418	3.0418	3.0418	3.0418	3.0418	3.0418	3.0418	3.0418	3.0418	3.0418	3.0418	3.0418	3.0418	3.0418	3.0418	3.0418	3.0418	3.0418	3.0418	3.0418	3.0418	3.0418	3.0418	3.0418	3.0418	3.0418	3.0418	3.0418	3.0418	3.0418	3.0418	3.0418	3.0418	3.0418	3.0418	3.0418	3.0418	3.0418	3.0418	3.0418	3.0418	3.0418	3.0418	3.0418	3.0418	3.0418	3.0418	3.0418
1700124L16Rik	3.0418	3.0418	3.0418	3.0418	3.0418	3.39271	3.0418	3.0418	3.0418	3.0418	3.0418	3.0418	3.0418	3.0418	3.0418	3.31103	3.0418	3.0418	3.0418	3.0418	3.0418	3.35796	3.0418	3.0418	3.0418	3.0418	3.0418	3.0418	3.76793	4.0188	3.63087	3.94554	3.74308	4.10089	3.0418	4.00486	3.60058	3.54267	3.59585	3.0418	3.0418	3.53954	3.0418	3.0418	3.0418	3.43106	3.98954	4.07468	3.95803
1700125G02Rik	3.0418	3.47545	3.0418	3.0418	3.0418	3.0418	3.0418	3.0418	3.0418	3.0418	3.0418	3.0418	3.0418	3.0418	3.0418	3.0418	3.0418	3.0418	3.0418	3.0418	3.0418	3.0418	3.0418	3.0418	3.0418	3.0418	3.0418	3.0418	3.0418	3.0418	3.0418	3.0418	3.0418	3.0418	3.0418	3.0418	3.0418	3.0418	3.0418	3.0418	3.42345	3.0418	3.62738	3.0418	3.0418	3.0418	3.0418	3.0418	3.0418
1700125G22Rik	3.0418	3.47545	3.0418	3.0418	3.0418	3.0418	3.0418	3.0418	3.34646	3.0418	3.0418	3.0418	3.0418	3.0418	3.39016	3.0418	3.0418	3.0418	3.0418	3.0418	3.0418	3.0418	3.0418	3.0418	3.0418	3.0418	3.0418	3.0418	3.0418	3.0418	3.0418	3.45123	3.0418	3.54972	3.95391	3.47886	3.43815	3.74667	3.43477	3.53069	3.57998	3.0418	3.45728	3.0418	3.0418	3.43106	3.47172	3.51157	3.45704
1700125H03Rik	3.48085	3.0418	3.0418	3.48967	3.0418	3.0418	3.0418	3.0418	3.0418	3.0418	3.71101	3.51431	3.37071	3.0418	3.0418	3.0418	3.0418	3.0418	3.0418	3.0418	3.37344	3.0418	3.0418	3.57317	3.0418	3.0418	3.0418	3.0418	3.0418	3.0418	3.0418	3.45123	3.0418	3.83887	4.57489	3.90628	3.72407	3.74667	3.91006	3.53069	3.0418	3.7423	3.0418	3.55409	3.0418	3.0418	4.07645	3.51157	3.0418
1700125H20Rik	3.0418	3.65281	3.0418	3.48967	3.55615	3.0418	3.0418	3.0418	3.0418	3.0418	3.71101	3.0418	3.37071	3.0418	3.0418	3.31103	3.0418	3.32866	3.0418	3.62972	3.0418	3.0418	3.0418	3.0418	3.40429	3.0418	3.47394	3.30456	3.0418	3.0418	3.0418	3.0418	3.0418	3.0418	3.57419	3.47886	3.0418	3.54267	3.0418	3.0418	3.0418	3.53954	3.0418	3.0418	3.0418	3.0418	3.0418	3.0418	3.0418
1700126H18Rik	3.48085	3.0418	3.5089	3.0418	3.0418	3.0418	3.0418	3.0418	3.0418	3.0418	3.0418	3.0418	3.0418	3.0418	3.0418	3.0418	3.0418	3.0418	3.0418	3.0418	3.0418	3.0418	3.0418	3.41859	3.40429	3.0418	3.0418	3.0418	3.0418	3.0418	3.0418	3.0418	3.0418	3.0418	3.0418	3.0418	3.0418	3.0418	3.0418	3.0418	3.42345	3.53954	3.0418	3.0418	3.0418	3.0418	3.0418	3.0418	3.0418
1700128A07Rik	3.0418	3.0418	3.0418	3.0418	3.0418	3.0418	3.0418	3.0418	3.0418	3.0418	3.0418	3.0418	3.0418	3.0418	3.0418	3.0418	3.0418	3.0418	3.0418	3.0418	3.0418	3.0418	3.0418	3.0418	3.0418	3.0418	3.0418	3.0418	3.0418	3.0418	3.0418	3.0418	3.0418	3.0418	3.0418	3.0418	3.0418	3.0418	3.0418	3.0418	3.0418	3.53954	3.0418	3.0418	3.0418	3.0418	3.0418	3.0418	3.0418
1700128F08Rik	3.0418	3.0418	3.0418	3.0418	3.0418	3.0418	3.0418	3.0418	3.0418	3.0418	3.0418	3.0418	3.0418	3.0418	3.0418	3.0418	3.0418	3.0418	3.0418	3.0418	3.0418	3.0418	3.0418	3.0418	3.0418	3.0418	3.0418	3.0418	3.0418	3.53725	3.0418	3.0418	3.0418	3.0418	3.0418	3.0418	3.0418	3.0418	3.0418	3.53069	3.0418	3.0418	3.0418	3.0418	3.0418	3.0418	3.0418	3.0418	3.0418
1700129C05Rik	3.0418	3.0418	3.0418	3.0418	3.0418	3.0418	3.0418	3.0418	3.0418	3.0418	3.0418	3.0418	3.0418	3.0418	3.0418	3.0418	3.0418	3.0418	3.0418	3.0418	3.0418	3.35796	3.0418	3.0418	3.0418	3.0418	3.34794	3.0418	3.0418	3.0418	3.0418	3.0418	3.0418	3.0418	3.0418	3.0418	3.0418	3.0418	3.0418	3.0418	3.0418	3.0418	3.0418	3.0418	3.0418	3.0418	3.0418	3.0418	3.0418
1810006J02Rik	3.48085	3.47545	3.5089	3.0418	3.67012	3.0418	3.0418	3.63962	4.47714	4.45438	3.0418	3.85314	3.60906	3.45428	4.69574	4.48236	4.49602	4.28771	3.87872	4.12378	5.31015	5.18778	3.0418	3.57317	3.55311	3.0418	4.48361	4.26655	4.05841	3.89182	4.72433	3.61891	3.74308	3.75649	4.08947	4.00486	3.0418	4.49035	4.59148	4.52855	3.79861	3.7423	4.04282	4.05106	3.42512	4.24162	4.29641	3.51157	4.25569
1810007C17Rik	3.0418	3.0418	3.0418	3.0418	3.0418	3.0418	3.0418	3.0418	3.0418	3.0418	3.0418	3.0418	3.0418	3.0418	3.0418	3.0418	3.0418	3.0418	3.0418	3.0418	3.0418	3.0418	3.0418	3.0418	3.0418	3.0418	3.0418	3.0418	3.0418	3.0418	3.0418	3.0418	3.0418	3.0418	3.0418	3.0418	3.0418	3.0418	3.0418	3.0418	3.0418	3.0418	3.0418	3.0418	3.0418	3.0418	3.0418	3.0418	3.0418
1810007D17Rik	3.0418	3.0418	3.0418	3.0418	3.0418	3.0418	3.0418	3.0418	3.0418	3.0418	3.0418	3.0418	3.0418	3.0418	3.0418	3.0418	3.0418	3.0418	3.0418	3.0418	3.0418	3.0418	3.0418	3.0418	3.0418	3.0418	3.0418	3.0418	3.0418	3.0418	3.0418	3.45123	3.0418	3.0418	3.0418	3.47886	3.0418	3.0418	3.0418	3.0418	3.0418	3.0418	3.0418	3.0418	3.0418	3.0418	3.47172	3.51157	3.0418
1810008I18Rik	3.0418	3.0418	3.0418	3.0418	3.0418	3.0418	3.0418	3.0418	3.0418	3.0418	3.0418	3.0418	3.0418	3.0418	3.0418	3.0418	3.0418	3.0418	3.0418	3.0418	3.0418	3.0418	3.0418	3.0418	3.0418	3.0418	3.0418	3.0418	3.0418	3.0418	3.0418	3.0418	3.0418	3.0418	3.0418	3.0418	3.0418	3.0418	3.0418	3.0418	3.0418	3.0418	3.0418	3.0418	3.0418	3.0418	3.0418	3.0418	3.0418
1810009A15Rik	5.41095	5.69759	5.47754	5.50389	4.16913	3.95709	4.03244	3.88141	3.89271	4.27655	4.83411	3.9163	4.11044	4.61781	4.21858	3.9964	4.12	4.22722	3.97436	4.12378	3.90809	3.86859	4.39908	3.78914	4.35579	4.21212	4.19846	3.90168	6.0804	6.23649	4.63702	6.32904	5.26766	6.36044	5.26789	6.08796	5.88521	5.7905	5.85088	5.34262	5.35391	5.26555	4.31816	4.66313	4.96624	4.80291	6.00077	5.65419	6.41029
1810009J06Rik	3.0418	3.47545	3.69955	3.0418	3.40646	3.39271	3.54436	3.46602	3.0418	3.0418	3.0418	3.0418	3.0418	3.45428	3.0418	3.0418	3.55921	3.0418	3.76908	3.0418	3.0418	3.0418	3.0418	3.0418	3.0418	3.0418	3.0418	3.0418	3.0418	3.0418	3.0418	3.0418	3.0418	3.54972	3.57419	3.47886	3.0418	3.0418	3.43477	3.53069	3.57998	3.53954	4.43166	3.0418	3.42512	3.0418	3.47172	3.0418	3.45704
1810010D01Rik	3.0418	3.47545	3.0418	3.0418	3.40646	3.39271	3.0418	3.63962	3.83915	4.01805	3.0418	3.61924	3.69544	3.0418	3.9506	3.88245	3.55921	3.44682	3.0418	3.62972	4.11895	4.11432	3.0418	3.57317	3.55311	3.0418	3.89674	3.68106	3.0418	3.53725	4.43946	3.0418	3.0418	3.40188	3.0418	3.47886	3.0418	3.54267	3.59585	3.53069	3.0418	3.53954	3.62738	3.55409	3.42512	3.0418	3.0418	3.0418	3.45704
1810010H24Rik	4.71024	4.64403	4.06899	4.64114	4.40644	4.64508	4.60147	4.40283	4.6791	4.67632	4.61642	4.51493	4.77157	4.61781	4.53582	4.3451	4.45581	4.09346	4.39865	4.261	4.53342	4.52725	4.54671	4.64748	4.35579	4.52787	4.36643	4.29137	4.7396	4.54704	4.04864	4.986	4.96171	4.99435	4.57489	4.38063	4.60371	4.33038	4.19352	4.92961	4.83742	5.41271	4.6283	5.35937	5.29669	4.53591	4.63138	5.04038	4.5335
1810011H11Rik	3.0418	3.47545	3.0418	3.0418	3.76545	3.73856	3.0418	3.63962	6.13809	6.12893	3.71101	3.0418	3.0418	3.0418	6.06791	5.97379	5.35925	5.71191	6.41787	6.29829	7.10314	6.90613	4.01857	3.0418	3.40429	3.60516	6.24552	5.94632	4.67426	3.73911	3.0418	3.0418	3.5401	3.0418	3.0418	3.0418	3.72407	3.54267	3.43477	4.65769	4.42084	4.23294	3.45728	3.0418	3.70192	3.81346	3.0418	3.0418	4.90737
1810011O10Rik	3.0418	3.0418	3.0418	3.0418	3.0418	3.0418	3.0418	3.0418	3.0418	3.0418	3.0418	3.0418	3.0418	3.0418	3.0418	3.0418	3.0418	3.0418	3.0418	3.0418	3.0418	3.0418	3.0418	3.0418	3.0418	3.0418	3.0418	3.0418	3.0418	3.0418	3.0418	3.0418	3.0418	3.0418	3.0418	3.0418	3.0418	3.0418	3.0418	3.0418	3.0418	3.0418	3.95855	3.0418	3.0418	3.0418	3.0418	3.51157	3.0418
1810012K16Rik	4.09768	3.65281	3.96428	3.48967	3.0418	3.89115	3.39806	3.77143	3.89271	3.82584	3.98009	3.37666	3.50595	3.7515	4.01116	3.57794	3.99741	3.44682	3.76908	3.45895	4.02006	3.86859	3.73895	3.69079	3.9185	3.60516	3.78484	3.77799	3.76793	3.89182	3.63087	3.74631	3.74308	3.83887	3.79057	4.24734	3.43815	3.74667	3.71833	4.1153	3.88559	3.0418	3.95855	4.05106	3.88922	3.81346	3.78108	4.16871	3.86398
1810013A23Rik	3.0418	3.0418	3.0418	3.0418	3.0418	3.0418	3.0418	3.0418	3.0418	3.0418	3.0418	3.0418	3.0418	3.0418	3.0418	3.0418	3.0418	3.0418	3.0418	3.0418	3.0418	3.0418	3.0418	3.0418	3.0418	3.0418	3.0418	3.0418	3.0418	4.0188	3.86928	3.61891	3.89661	3.83887	3.57419	3.90628	3.99809	3.0418	3.91006	3.0418	3.0418	3.0418	3.0418	3.0418	3.0418	3.0418	4.07645	3.84851	3.0418
1810013L24Rik	10.1656	10.3223	10.1677	10.2608	9.96918	9.88821	9.91181	9.79523	10.1874	10.181	9.90937	9.9715	9.9204	9.97241	10.1598	10.2453	10.0073	9.78522	10.1539	10.217	10.0923	10.2135	9.86271	9.97624	9.99784	9.86035	10.1254	10.1037	10.5074	10.2397	11.556	10.2781	10.3447	10.2648	10.3869	10.1603	10.4716	10.1335	10.2923	9.8583	9.72726	9.90816	9.78502	10.1391	10.0107	9.98934	10.0593	9.91982	9.64293
1810014B01Rik	5.82732	5.8588	6.08146	6.12726	5.64458	5.97464	6.04253	6.06819	5.70118	5.52278	6.15871	5.7299	5.87613	5.95758	5.2609	5.48771	5.88802	5.90112	5.46421	5.48439	5.67188	5.5225	5.62671	5.7447	6.00035	5.87165	5.35279	5.33128	6.70376	5.79339	5.08591	6.18912	6.42845	6.19571	6.85423	6.6264	6.54381	6.50653	6.90451	6.08715	6.61603	6.0207	6.38793	6.4437	6.35266	6.13741	6.56348	6.25482	6.45657
1810018F18Rik	3.0418	3.0418	3.0418	3.0418	3.0418	3.0418	3.0418	3.0418	3.0418	3.0418	3.0418	3.0418	3.0418	3.0418	3.0418	3.0418	3.0418	3.0418	3.0418	3.0418	3.0418	3.0418	3.0418	3.0418	3.0418	3.0418	3.0418	3.0418	3.0418	3.0418	3.0418	3.0418	3.0418	3.0418	3.0418	3.0418	3.0418	3.0418	3.0418	3.0418	3.0418	3.0418	3.0418	3.0418	3.0418	3.0418	3.0418	3.0418	3.0418
1810019D21Rik	3.48085	3.0418	3.5089	3.67269	3.0418	3.0418	3.0418	3.0418	3.64778	3.70672	3.0418	3.0418	3.0418	3.0418	3.53327	3.64038	3.0418	3.0418	3.46464	3.0418	5.48136	5.42922	3.0418	3.0418	3.40429	3.0418	3.84295	3.49566	3.0418	3.53725	3.0418	3.45123	3.0418	3.54972	3.95391	3.65758	3.72407	3.74667	3.71833	3.53069	3.42345	3.53954	3.0418	3.55409	3.80188	3.71203	3.89244	4.07468	3.62704
1810020O05Rik	3.0418	3.47545	3.0418	3.67269	3.76545	3.0418	3.39806	3.77143	3.0418	3.55864	3.0418	3.0418	3.0418	3.45428	3.0418	3.31103	3.0418	3.0418	3.46464	3.62972	3.50979	3.6704	3.0418	3.41859	3.66641	3.0418	3.34794	3.30456	3.55793	3.53725	3.63087	3.0418	3.74308	3.0418	3.0418	3.47886	3.82725	3.0418	3.0418	3.53069	3.42345	3.7423	3.45728	3.55409	3.42512	3.0418	3.64758	3.0418	3.0418
1810021B22Rik	3.48085	3.89967	3.96428	3.0418	3.0418	3.39271	3.54436	3.63962	3.64778	3.46455	3.0418	3.70711	3.60906	3.7515	3.73356	3.50677	3.0418	3.53704	3.0418	3.45895	3.70079	3.48803	3.73895	3.78914	3.66641	3.0418	3.34794	3.62615	3.76793	3.53725	3.86928	3.85269	3.74308	4.43148	4.31189	3.47886	3.43815	3.90095	3.0418	4.21267	3.42345	3.89567	4.19043	3.92015	3.70192	4.39897	3.78108	3.96943	3.62704
1810022K09Rik	5.97838	5.89632	6.11862	6.44116	5.26723	5.5958	5.54905	5.63013	5.43582	5.68577	5.6256	5.54406	5.65463	5.61396	5.53509	5.58908	5.74821	5.70266	5.51162	5.7369	5.51027	5.26808	5.36797	5.52572	5.53498	5.569	5.2234	5.58272	8.22181	7.31508	7.29134	7.48393	7.01188	7.54127	7.29172	7.76301	7.9336	7.94718	7.48884	6.31448	7.07464	6.32141	7.0236	6.25634	6.6268	6.38922	6.91313	6.93669	7.6205
1810024B03Rik	4.09768	3.99755	4.16255	4.2757	3.67012	3.53686	3.74903	3.88141	3.56755	3.97417	3.0418	3.37666	3.60906	3.9521	3.73356	3.96019	3.0418	3.61273	3.63768	3.62972	3.61373	3.6704	3.73895	3.41859	3.40429	3.0418	3.65069	3.73136	4.27493	4.73762	4.04864	4.4127	4.23421	4.20719	4.08947	4.31616	4.47037	4.0292	4.50495	4.65769	5.14663	4.13403	4.53429	4.16478	4.51478	4.29681	4.80993	4.40595	4.87113
1810026B05Rik	6.22391	6.10244	6.20744	6.09337	5.44206	5.4862	5.34123	5.58646	6.01828	5.89446	5.67877	5.37776	5.47938	5.75072	5.91204	6.07733	5.6726	5.65546	5.41508	5.6373	6.09519	6.05907	5.36797	5.52572	5.46609	5.39939	5.73225	5.84483	8.96572	8.03018	12.065	8.20952	8.42086	8.32416	8.68308	8.19326	8.56389	8.1646	8.715	5.84038	5.60578	5.97526	6.03653	5.83943	5.73356	5.83029	8.22468	8.2283	8.36114
1810026J23Rik	9.13062	9.10751	9.14645	9.18679	9.6586	9.68695	9.74276	9.80683	9.40672	9.47969	9.48804	9.58784	9.79336	9.57993	9.49248	9.3833	9.53056	9.69541	9.69705	9.78405	9.52833	9.48862	9.4626	9.37207	9.58089	9.58853	9.47351	9.49144	9.38442	9.4512	9.63911	9.61764	9.46346	9.42467	9.4472	9.82448	9.62585	9.75589	9.71246	9.47462	9.48852	9.29046	9.33764	9.30451	9.2189	9.2595	9.87574	9.72183	9.9895
1810030O07Rik	9.40869	9.44206	9.80018	9.78859	10.077	10.072	10.0854	10.0488	10.1593	10.1551	10.1823	10.0044	10.014	10.1567	10.178	10.1655	10.0178	10.0601	9.82156	9.96609	10.2916	10.3689	10.2725	10.0232	10.1316	10.1804	10.058	10.1073	10.072	9.64217	10.3566	9.74098	9.82087	9.91006	10.0833	10.0192	10	10.1374	10.4149	9.8657	9.83741	9.97213	10.0447	9.80692	9.79589	9.96604	9.8915	9.84164	10.004
1810032O08Rik	9.23737	9.33893	9.16627	9.00999	8.37063	8.53056	8.49591	8.65417	8.06394	8.085	8.3511	8.3046	8.67826	8.52377	8.18372	8.06544	8.38242	8.38132	8.41131	8.56829	7.94822	8.068	8.14405	8.29706	8.53384	8.42523	8.07913	8.15731	8.0409	8.39236	8.42969	8.66622	8.59021	8.49688	8.40741	8.37646	8.4549	8.40988	8.27093	8.8613	8.74492	8.5871	8.38962	8.99597	8.72961	8.49221	8.44209	8.52608	9.20107
1810034E14Rik	5.82732	5.78055	5.76581	6.04094	5.4956	5.71113	5.50003	5.58646	6.13809	6.25691	5.96078	5.70485	5.32713	5.63435	6.03595	5.96705	5.23608	5.52448	5.13776	5.23048	6.2543	6.25424	5.76654	5.91991	5.4483	5.09591	5.92512	6.1911	5.82841	6.05423	6.0955	4.81132	5.18737	5.26399	5.83928	5.73544	6.03279	5.7079	6.05478	6.27905	5.94823	6.20872	5.7474	5.8924	6.01218	5.51569	6.05051	6.11322	5.70783
1810037I17Rik	8.63769	8.58075	8.90569	8.95986	6.78144	6.9557	6.98843	7.01416	7.49577	7.58783	7.43479	6.75013	7.0727	7.1154	7.39687	7.24307	6.75375	6.51591	6.48887	6.71786	6.7141	6.43902	7.01865	6.79873	6.76654	6.83844	6.76187	7.15804	9.29426	9.04259	7.11362	8.55275	8.75175	8.7038	8.92455	8.49395	8.73042	8.57836	8.42606	8.59168	8.42045	8.32722	8.71189	8.15411	8.12913	8.48979	8.60115	8.80721	9.13208
1810041L15Rik	3.0418	3.0418	3.0418	3.48967	3.0418	3.0418	3.0418	3.0418	3.0418	3.34126	3.0418	3.0418	3.0418	3.0418	3.0418	3.0418	3.0418	3.0418	3.0418	3.0418	3.0418	3.0418	3.0418	3.41859	3.0418	3.0418	3.34794	3.41288	3.0418	3.0418	3.0418	3.0418	3.0418	3.40188	3.0418	3.65758	3.0418	3.54267	3.0418	3.0418	4.16174	3.7423	3.86444	3.55409	3.0418	3.0418	3.0418	3.0418	3.45704
1810043G02Rik	7.02759	7.05429	6.6602	6.75281	6.79532	6.98959	6.77116	6.7788	6.71968	6.63097	6.67802	7.0571	7.05876	6.68039	6.48433	6.58073	6.54479	6.48441	6.83541	6.7741	6.64602	6.59651	6.4472	7.02306	6.77349	6.68548	6.36888	6.55173	6.29386	6.7554	5.90415	6.52124	6.67426	6.90771	6.63988	6.90062	6.88074	6.74248	6.15919	6.74816	6.86005	7.10587	6.83568	6.77135	6.81949	6.68182	6.80265	6.94708	6.54484
1810043H04Rik	7.90135	7.90441	8.13419	8.28662	6.59541	6.41278	6.29829	6.53102	6.59231	6.34899	6.33217	6.51554	6.38511	6.29721	6.71539	6.50907	6.30955	6.7718	6.22301	6.32376	6.47084	6.20006	6.27341	6.2484	6.32972	6.56381	6.37542	6.42295	7.54345	8.09378	6.96014	7.73558	7.36538	7.63424	7.70714	7.63599	7.19701	7.73923	7.14998	8.19065	8.01727	7.83934	7.77957	8.18568	7.88305	7.94607	8.08672	8.05261	8.52354
1810044D09Rik	5.07344	5.18368	5.5347	5.89066	4.11386	3.81897	4.24397	4.21354	4.11722	4.17438	4.61642	4.02925	4.55262	3.9521	4.01116	4.15766	4.12	4.05673	4.13797	4.261	4.02006	3.86859	4.22742	4.40441	4.35579	4.14837	4.12223	3.97417	5.48492	4.95201	4.95361	5.61894	5.8317	5.80725	5.83928	6.243	5.80509	6.03489	5.34417	5.84038	6.07973	5.26555	6.08185	5.43408	5.29669	5.64676	5.93157	5.93471	5.85521
1810046K07Rik	3.48085	3.65281	3.0418	3.0418	3.55615	3.73856	3.54436	3.0418	3.0418	3.0418	3.0418	3.0418	3.37071	3.7515	3.39016	3.31103	3.40864	3.53704	3.46464	3.62972	3.50979	3.0418	3.0418	3.0418	3.66641	3.0418	3.47394	3.41288	3.0418	3.0418	3.0418	3.45123	3.0418	3.0418	3.0418	3.65758	3.72407	3.54267	3.71833	3.53069	3.42345	3.53954	3.62738	3.0418	3.42512	3.0418	3.64758	3.0418	3.45704
1810053B23Rik	3.0418	3.47545	3.0418	3.0418	3.0418	3.0418	3.0418	3.0418	3.0418	3.0418	3.0418	3.0418	3.0418	3.0418	3.0418	3.0418	3.0418	3.0418	3.0418	3.0418	3.0418	3.0418	3.0418	3.0418	3.0418	3.0418	3.0418	3.0418	3.0418	3.0418	3.0418	3.0418	3.0418	3.0418	3.0418	3.0418	3.43815	3.0418	3.0418	3.0418	3.0418	3.0418	4.11961	3.0418	3.0418	3.0418	3.47172	3.0418	3.0418
1810055G02Rik	7.94705	7.8678	7.7403	8.07161	8.9969	8.95466	9.05987	8.72682	8.60207	8.5868	8.78214	9.12595	9.19993	9.04271	8.82325	8.82128	8.68614	8.57056	9.25233	9.11287	8.54283	8.54707	8.97602	9.24215	9.16622	9.11784	8.95341	9.03015	8.34517	9.13611	7.67297	9.05117	8.84812	9.11956	8.7146	8.81759	8.90438	8.88422	8.44655	8.80079	9.06376	8.91472	8.93106	8.86244	8.81454	8.96601	8.9816	9.17583	8.70317
1810058I24Rik	8.86405	8.73599	9.02868	9.07136	8.45356	8.56829	8.22105	8.45323	8.2899	8.24269	8.50954	8.67726	8.12577	8.2717	8.26749	8.25409	8.49807	8.60971	8.45299	8.48415	8.28815	8.15304	8.47758	8.6876	8.27355	8.24936	8.13373	8.46991	9.23171	9.79336	9.17339	9.61641	9.81928	9.73167	9.78621	10.4133	9.73153	10.2486	9.92993	9.84188	10.0233	9.85054	10.0606	9.7588	9.64176	9.66849	10.1677	10.196	10.208
1810062G17Rik	4.17829	4.16488	4.06899	3.81149	3.67012	3.73856	3.54436	3.0418	3.64778	3.55864	3.0418	3.85314	3.60906	3.0418	3.81341	3.57794	3.67382	3.53704	3.76908	3.75942	3.61373	3.80871	3.73895	3.87509	3.55311	3.0418	3.65069	3.86273	4.36751	4.31715	4.72433	4.17442	4.23421	4.10089	3.95391	4.24734	3.82725	4.56231	4.06324	4.30112	4.42084	4.32274	4.11961	4.66313	4.22417	4.44655	3.98954	4.07468	4.62746
1810062O18Rik	3.79656	3.47545	3.0418	3.67269	3.67012	3.89115	3.65579	3.63962	3.78132	3.87854	3.0418	3.61924	3.83903	3.9521	3.9506	3.92228	3.85353	3.97825	3.97436	3.62972	4.32823	4.11432	3.0418	4.02253	3.9185	3.72963	3.72133	3.90168	4.05841	3.53725	4.63702	3.85269	3.89661	3.9128	4.31189	4.00486	3.91734	3.74667	3.82067	4.00621	3.79861	3.7423	3.75658	3.55409	3.58233	3.90206	3.89244	3.84851	3.62704
1810064F22Rik	3.0418	3.0418	3.0418	3.0418	3.0418	3.0418	3.0418	3.0418	3.0418	3.0418	3.0418	3.0418	3.0418	3.0418	3.39016	3.0418	3.0418	3.0418	3.0418	3.0418	3.37344	3.0418	3.0418	3.0418	3.0418	3.0418	3.0418	3.0418	3.0418	3.0418	3.0418	3.61891	3.0418	3.40188	3.0418	3.0418	3.0418	3.0418	3.0418	3.0418	3.0418	3.0418	3.0418	3.0418	3.0418	3.0418	3.0418	3.0418	3.0418
1810065E05Rik	3.0418	3.0418	3.0418	3.0418	3.0418	3.0418	3.0418	3.0418	3.0418	3.0418	3.0418	3.0418	3.0418	3.0418	3.0418	3.0418	3.0418	3.0418	3.0418	3.0418	3.0418	3.0418	3.0418	3.0418	3.0418	3.0418	3.0418	3.0418	3.0418	3.0418	3.0418	3.0418	3.0418	3.0418	3.0418	3.0418	3.0418	3.0418	3.0418	3.0418	3.0418	3.0418	3.0418	3.0418	3.0418	3.0418	3.0418	3.0418	3.0418
2010001E11Rik	3.0418	3.0418	3.0418	3.0418	3.0418	3.0418	3.0418	3.0418	3.0418	3.0418	3.0418	3.0418	3.0418	3.0418	3.0418	3.0418	3.0418	3.0418	3.0418	3.0418	3.0418	3.0418	3.0418	3.41859	3.0418	3.0418	3.0418	3.0418	3.0418	3.0418	3.0418	3.0418	3.0418	3.0418	3.0418	3.0418	3.0418	3.0418	3.0418	3.0418	3.42345	3.0418	3.0418	3.0418	3.0418	3.0418	3.0418	3.0418	3.0418
2010002M12Rik	3.0418	3.47545	3.5089	4.02797	3.0418	3.0418	3.0418	3.0418	3.0418	3.0418	3.0418	3.37666	3.0418	3.0418	3.0418	3.57794	3.67382	3.79348	3.76908	3.0418	4.02006	3.58724	3.0418	3.0418	3.0418	3.0418	3.0418	3.30456	3.0418	3.0418	4.32541	4.30057	4.40673	4.04269	3.57419	3.65758	3.0418	3.0418	3.0418	3.72997	3.42345	3.0418	3.0418	3.0418	3.0418	3.43106	3.0418	3.0418	4.25569
2010003K11Rik	3.0418	3.47545	3.0418	3.0418	3.0418	3.0418	3.0418	3.0418	3.0418	3.34126	3.0418	3.0418	3.0418	3.0418	3.0418	3.0418	3.0418	3.0418	3.0418	3.0418	3.8455	3.58724	3.53713	3.0418	3.0418	3.0418	3.57008	3.30456	3.0418	3.0418	3.0418	3.0418	3.0418	3.0418	3.0418	3.47886	3.0418	3.0418	3.0418	3.0418	3.42345	3.0418	3.45728	3.0418	3.0418	3.0418	3.0418	3.0418	3.0418
2010005H15Rik	3.0418	3.0418	3.0418	3.67269	3.0418	3.0418	3.0418	3.0418	3.0418	3.0418	3.0418	3.0418	3.0418	3.0418	3.0418	3.0418	3.0418	3.0418	3.0418	3.0418	3.0418	3.0418	3.0418	3.0418	3.0418	3.0418	3.0418	3.0418	3.0418	3.53725	3.0418	3.0418	3.0418	3.0418	3.0418	3.47886	3.82725	3.0418	3.59585	3.0418	3.42345	3.0418	3.45728	3.0418	3.0418	3.0418	3.47172	3.51157	3.62704
2010009K17Rik	3.48085	3.0418	3.5089	3.67269	3.99191	3.0418	3.65579	3.46602	3.78132	3.82584	3.98009	3.51431	3.37071	3.62318	3.81341	3.69659	3.40864	3.6791	3.76908	3.62972	3.70079	3.58724	3.89162	3.41859	3.0418	3.72963	3.78484	3.56516	3.55793	3.73911	4.32541	3.45123	3.74308	3.66229	3.95391	3.79319	3.72407	3.74667	3.71833	3.53069	3.69906	3.7423	3.45728	3.76258	3.42512	3.0418	3.47172	4.16871	3.0418
2010010A06Rik	3.0418	3.47545	3.5089	3.0418	3.40646	3.73856	3.0418	3.0418	3.47186	3.46455	3.0418	3.51431	3.50595	3.0418	3.39016	3.42199	3.40864	3.0418	3.0418	3.0418	3.37344	3.58724	3.0418	3.78914	3.55311	3.0418	3.0418	3.56516	3.0418	3.53725	3.0418	3.45123	3.0418	3.0418	3.0418	3.0418	3.43815	3.0418	3.0418	3.0418	3.0418	3.53954	3.0418	3.0418	3.70192	3.43106	3.0418	3.51157	3.45704
2010012O05Rik	7.1024	7.02123	7.12556	7.2482	6.43572	6.52535	6.52274	6.80695	6.75972	6.81207	6.48663	6.53664	6.30018	6.52864	6.79321	6.99473	6.67988	6.55179	6.50036	6.58781	6.47084	6.19215	6.63102	6.7309	6.72412	6.64914	6.52998	6.77519	7.40491	7.23256	6.85947	7.15848	7.46619	7.24451	7.42179	7.31491	7.42471	7.23237	7.30428	7.43977	7.40171	7.35371	7.58627	7.23202	7.27812	7.42876	7.12673	7.26988	7.63556
2010015L04Rik	5.51511	5.65415	5.28981	5.52993	5.93978	5.40208	5.64209	5.58646	5.41008	4.97283	4.73025	5.55821	5.03975	5.18152	5.05516	5.04952	5.59257	5.68398	4.90087	5.2853	5.9679	6.24663	5.36797	5.3293	4.90109	4.87907	5.04558	4.55077	5.11936	4.8495	6.75117	4.51415	4.68608	4.77624	5.12707	5.85672	5.72004	5.5581	5.94194	5.62852	4.89961	5.82927	6.06691	5.43408	5.27405	5.43468	5.61395	5.67987	5.07431
2010016I18Rik	6.67084	6.57324	6.68499	6.60551	6.34384	6.46213	6.14005	6.00412	6.79386	6.71705	6.57183	6.59141	6.65701	6.68039	6.85496	6.74939	6.99188	6.6915	6.54543	6.28538	7.99846	7.86651	6.5573	6.90508	6.43907	6.39817	6.59299	6.10643	7.13574	6.85708	10.3612	7.29394	7.61262	7.77695	7.83465	7.244	7.49156	6.82177	7.13739	7.14998	7.0932	7.5949	7.15518	7.5801	7.7163	7.35609	6.9991	7.30254	6.32546
2010106C02Rik	3.0418	3.0418	3.0418	3.0418	3.0418	3.0418	3.0418	3.0418	3.0418	3.0418	3.0418	3.0418	3.0418	3.0418	3.0418	3.0418	3.0418	3.0418	3.0418	3.0418	3.0418	3.0418	3.0418	3.0418	3.0418	3.0418	3.0418	3.0418	3.0418	3.0418	3.63087	3.61891	3.89661	3.40188	3.79057	3.0418	3.60058	3.0418	3.43477	3.0418	3.0418	3.0418	3.0418	3.0418	3.0418	3.0418	3.89244	3.84851	3.0418
2010106E10Rik	3.0418	3.0418	3.0418	3.0418	3.0418	3.0418	3.0418	3.0418	3.0418	3.0418	3.0418	3.0418	3.0418	3.0418	3.0418	3.0418	3.0418	3.0418	3.0418	3.0418	3.0418	3.0418	3.0418	3.0418	3.0418	3.44142	3.34794	3.0418	3.0418	3.0418	3.0418	3.0418	3.0418	3.0418	3.0418	3.0418	3.0418	3.0418	3.0418	3.0418	3.0418	3.0418	3.75658	3.0418	3.0418	3.0418	3.0418	3.51157	3.0418
2010107E04Rik	9.92675	9.92069	10.0121	10.0074	7.41831	7.62772	7.72093	7.86277	7.95874	8.11684	7.6448	7.45637	7.69957	7.9383	7.77029	7.82833	7.63422	8.00168	7.76208	7.73976	7.7187	7.70545	7.47447	7.15519	7.54696	7.49307	7.57781	7.87171	10.3609	9.7147	10.2843	9.39961	9.83504	9.32262	9.92567	9.79014	9.86719	9.80846	9.99048	10.3063	10.0831	9.9141	10.0699	9.73057	9.80912	9.81288	9.86552	9.81367	10.8607
2010107G12Rik	3.91013	3.99755	3.0418	3.48967	3.55615	3.64666	4.09008	3.97733	4.26343	4.24366	4.18146	3.85314	3.90114	3.85862	4.17093	4.21496	4.12	3.6791	3.87872	4.04673	4.32823	4.40701	3.73895	4.20494	3.66641	3.92439	4.23439	4.1026	3.92661	4.12918	4.95361	3.61891	4.3241	4.15555	3.79057	3.47886	3.91734	3.54267	4.06324	4.38246	3.88559	4.13403	4.58227	3.55409	3.70192	4.18314	3.89244	4.07468	3.62704
2010107G23Rik	4.55992	5.01646	5.18492	4.58802	3.99191	3.73856	3.74903	4.06321	3.83915	3.55864	4.18146	4.34	4.199	4.03583	3.9506	3.96019	3.99741	4.47514	4.39865	4.261	4.40108	3.97577	4.67714	4.7182	4.26393	4.14837	3.65069	3.93875	4.05841	4.4757	3.0418	6.88333	6.75648	7.2046	6.92359	4.87751	3.99809	4.49035	4.36086	5.50886	5.19561	5.54528	5.40528	5.10594	4.67285	4.57803	4.72401	4.95518	4.94258
2010109A12Rik	3.0418	3.0418	3.0418	3.0418	3.0418	3.0418	3.0418	3.0418	3.34646	3.46455	3.0418	3.0418	3.0418	3.0418	3.0418	3.42199	3.0418	3.32866	3.0418	3.0418	3.37344	3.0418	3.0418	3.0418	3.40429	3.0418	3.0418	3.41288	4.45255	4.12918	4.54259	3.61891	3.74308	3.9128	3.0418	3.47886	3.60058	3.90095	3.71833	3.0418	3.0418	3.0418	3.45728	3.0418	3.42512	3.43106	3.89244	3.70328	3.75618
2010109I03Rik	3.0418	3.0418	3.5089	3.0418	3.76545	3.95709	3.54436	3.0418	3.64778	3.70672	3.71101	3.97471	3.77107	3.62318	3.88511	3.9964	4.41406	4.31664	3.0418	3.75942	3.77702	3.86859	3.73895	4.44882	3.0418	3.0418	3.84295	3.73136	4.17288	4.0188	3.0418	4.65088	4.4834	4.50934	3.79057	3.90628	3.99809	3.54267	3.59585	4.65769	3.79861	4.4819	4.31816	4.05106	3.88922	4.05393	4.22854	4.25419	4.37572
2010111I01Rik	9.55002	9.53101	8.88457	8.83396	8.69374	8.77276	9.401	9.445	9.09184	9.23477	8.49518	8.63905	9.04297	8.91075	9.47106	9.46191	8.17346	8.20077	8.85725	8.74893	9.6495	9.699	8.79358	8.85541	9.17929	9.15855	9.37665	9.46148	9.35655	9.57882	10.4571	8.59573	8.6269	7.90056	7.93179	8.24492	9.34002	8.67712	9.11287	9.07308	8.96845	8.86043	8.90438	8.61455	8.82946	8.8463	8.90161	8.62922	8.93958
2010204K13Rik	6.25363	5.89632	6.42994	6.3865	5.61285	5.72488	5.86313	6.02041	5.86878	5.66513	5.72996	5.70485	5.50786	6.13765	5.58081	5.50671	6.13143	6.17735	5.96365	6.07603	5.79335	5.64551	5.81872	5.46975	5.87512	5.73748	5.49555	5.72002	6.97334	6.44778	4.88185	6.75472	6.54126	6.40545	6.34738	6.87263	7.23355	6.72882	6.85146	6.54037	6.81597	6.58425	6.26293	6.27623	6.41389	6.55708	7.00742	6.87276	7.67495
2010300C02Rik	6.14674	6.1801	6.32307	6.54452	6.15087	6.05243	5.92554	5.69311	4.36041	4.53332	5.82695	6.60478	6.29221	5.85801	4.93842	4.89334	6.09751	6.03148	5.70656	5.57387	5.05414	5.25241	6.49544	5.79063	6.08177	5.91879	4.99247	4.86861	4.27493	4.4757	5.02149	4.46461	5.01015	5.06724	5.12707	5.64822	5.3376	5.67923	6.01353	6.31448	6.19993	5.87965	6.18225	5.43408	5.31895	6.07331	5.6579	5.84738	5.5427
2010308F09Rik	3.48085	3.0418	3.0418	3.0418	3.0418	3.0418	3.0418	3.0418	3.0418	3.34126	3.0418	3.0418	3.0418	3.0418	3.0418	3.31103	3.0418	3.0418	3.0418	3.45895	3.0418	3.0418	3.0418	3.41859	3.0418	3.0418	3.0418	3.0418	3.0418	3.53725	3.0418	3.0418	3.5401	3.66229	3.0418	3.47886	3.43815	3.74667	3.71833	3.0418	3.42345	3.0418	3.0418	3.0418	3.0418	3.43106	3.0418	3.0418	3.62704
2010310C07Rik	3.0418	3.47545	3.0418	3.0418	3.0418	3.0418	3.39806	3.0418	3.0418	3.0418	3.0418	3.0418	3.37071	3.0418	3.0418	3.0418	3.0418	3.0418	3.46464	3.0418	3.0418	3.0418	3.0418	3.0418	3.0418	3.0418	3.0418	3.0418	3.0418	3.53725	4.43946	3.0418	3.0418	3.40188	3.0418	3.0418	3.0418	3.0418	3.0418	3.0418	3.0418	3.0418	3.0418	3.0418	3.0418	3.0418	3.0418	3.0418	3.0418
2010315B03Rik	6.62633	6.67267	6.69723	6.79523	6.7884	6.984	6.58521	6.7788	7.64696	7.62219	7.15247	6.85995	6.70567	6.62162	7.53492	7.59247	7.11443	6.89234	6.92314	6.97123	7.76008	7.53646	7.0618	7.19479	6.74549	6.55401	7.34938	7.49102	9.04061	7.96931	8.05962	7.70816	8.32138	7.84657	8.4595	7.88903	7.88475	8.05999	8.5731	7.34103	7.03037	7.3002	7.41626	7.04913	7.42316	7.65325	7.68282	7.38108	7.74603
2010320M18Rik	6.22391	6.60716	6.85834	6.74201	5.47799	5.2936	5.62702	5.84819	5.53411	5.32408	5.67877	5.44064	5.60307	5.92518	5.18247	5.32513	5.59257	5.75725	5.51162	5.50732	5.46667	5.17112	5.81872	5.41135	5.50097	5.52855	5.02812	5.321	6.21232	6.07569	5.31564	6.66204	6.17165	6.41428	5.86817	6.2576	5.8377	6.24283	6.25638	6.39935	6.48103	6.33935	6.27594	6.4437	6.18684	6.50008	6.40808	6.64904	7.10396
2200002D01Rik	4.50506	4.48831	4.16255	4.69192	3.84881	4.01804	4.14424	4.06321	4.26343	4.17438	3.98009	3.97471	4.199	3.9521	4.01116	4.15766	4.27783	4.01839	4.2768	4.19485	4.5941	4.60959	3.89162	4.30956	3.98642	4.07992	4.30256	3.93875	4.36751	4.0188	4.63702	4.1045	4.13521	3.83887	3.79057	3.65758	3.60058	3.90095	3.71833	4.30112	4.59029	3.89567	4.48417	4.52109	4.16646	3.71203	4.41994	3.96943	4.31747
2200002J24Rik	3.0418	3.0418	3.0418	3.0418	3.0418	3.0418	3.0418	3.0418	3.0418	3.0418	3.0418	3.0418	3.0418	3.0418	3.0418	3.0418	3.0418	3.0418	3.0418	3.0418	3.0418	3.0418	3.0418	3.0418	3.0418	3.0418	3.34794	3.41288	3.0418	3.0418	3.0418	3.0418	3.5401	3.0418	3.0418	3.47886	3.43815	3.54267	3.0418	3.0418	3.0418	3.0418	3.0418	3.0418	3.0418	3.81346	3.0418	3.0418	3.0418
2210010C04Rik	4.17829	3.99755	3.69955	3.81149	3.0418	3.39271	3.0418	3.46602	3.47186	3.46455	3.0418	3.70711	3.37071	3.62318	3.0418	3.57794	3.40864	3.61273	3.0418	3.0418	3.37344	3.35796	3.0418	3.0418	3.40429	3.0418	3.47394	3.41288	3.55793	3.0418	3.0418	3.0418	3.5401	3.54972	3.0418	3.47886	4.07172	3.74667	3.71833	3.53069	3.69906	3.0418	4.11961	3.55409	3.0418	3.0418	3.89244	3.70328	3.86398
2210011C24Rik	4.00912	3.78741	4.24762	3.67269	3.67012	3.39271	4.09008	3.63962	3.47186	3.46455	3.98009	3.9163	3.77107	3.45428	3.81341	3.50677	3.55921	3.61273	3.0418	3.45895	3.37344	3.35796	3.89162	3.0418	3.66641	3.92439	3.47394	3.56516	3.92661	4.31715	3.0418	3.85269	4.3241	4.43148	4.2071	3.90628	4.07172	3.74667	3.82067	3.72997	4.03476	4.40529	4.11961	3.92015	4.16646	3.81346	3.0418	3.0418	3.45704
2210013O21Rik	6.93051	6.89913	7.17001	7.16996	6.3627	6.42113	5.35984	5.28989	6.54145	6.39903	6.57183	6.68246	5.78717	5.71302	6.61174	6.43361	6.60996	6.76309	6.33027	6.17762	6.70196	6.48491	6.60199	6.82065	5.73745	5.93416	6.31538	6.38527	7.38661	6.90533	7.5059	7.23103	7.49828	7.75298	7.79831	8.03036	6.93361	7.99904	7.53269	7.57621	7.52059	7.7755	7.76594	7.49016	7.32636	7.13176	7.54708	7.68322	8.12578
2210015D19Rik	6.38012	6.32364	6.25816	6.35836	6.33432	6.32652	6.26995	6.4257	6.26255	6.23637	6.26533	6.21693	6.45812	6.23291	6.42018	6.307	6.34839	6.44676	6.58912	6.46763	6.39725	6.35673	6.15784	6.45021	6.31065	6.24768	6.30854	6.46418	6.74759	6.92885	6.63395	6.96307	6.7296	6.54056	6.48282	6.68133	6.40033	6.67286	6.55189	6.88334	6.83818	6.59916	6.68865	6.82604	6.82698	6.74848	7.03209	6.62331	7.05243
2210016F16Rik	10.2418	10.4211	10.4076	10.42	9.60276	9.59037	9.63698	9.83543	9.58071	9.66767	9.69061	9.56	9.56266	9.49438	9.66189	9.6004	9.65553	9.66671	9.69581	9.6335	9.91026	9.82056	9.55951	9.63042	9.58875	9.58376	9.50416	9.73258	10.1911	10.2065	8.30815	10.0381	9.95239	10.0528	9.91553	9.91148	9.91565	10.0197	9.98173	10.1575	10.003	9.94341	9.79399	9.95917	9.92821	10.1029	9.99928	9.94712	10.3583
2210016L21Rik	8.85689	8.83171	8.96473	8.93413	9.03232	8.88163	9.00988	8.99572	9.0127	9.09894	9.04125	9.10274	9.03116	9.01651	9.11204	9.03653	9.12294	9.14244	9.08447	8.97055	9.12836	8.92145	8.88917	9.04791	9.07408	9.16176	8.9685	9.08067	8.75058	8.96258	8.49798	8.83187	8.83876	9.01413	8.76062	9.04476	8.82102	9.06527	8.64358	9.09844	9.27831	9.2721	9.32377	9.20283	9.15076	9.20892	9.02101	9.20842	9.39167
2210018M11Rik	9.54261	9.49997	9.40739	9.62573	11.0361	10.9717	11.0138	10.819	11.0363	11.0415	10.8943	10.9916	11.0802	10.9907	10.9813	10.9885	10.8258	10.8283	11.0651	10.9087	11.3112	11.2985	10.9115	11.071	11.0805	11.061	11.0512	10.7777	10.6328	10.5435	11.6596	10.7834	10.7673	10.8634	10.5606	10.5449	10.8368	10.5956	10.5741	10.4021	10.5029	10.387	10.5499	10.3876	10.6135	10.5264	10.6044	10.6599	9.82223
2210019I11Rik	3.0418	3.0418	3.0418	3.0418	3.0418	3.0418	3.0418	3.0418	3.0418	3.0418	3.0418	3.0418	3.0418	3.0418	3.0418	3.0418	3.0418	3.0418	3.0418	3.0418	3.37344	3.0418	3.0418	3.0418	3.40429	3.0418	3.0418	3.0418	3.0418	3.0418	3.0418	3.0418	3.0418	3.0418	3.0418	3.0418	3.0418	3.0418	3.0418	3.0418	3.0418	3.0418	3.0418	3.55409	3.0418	3.0418	3.47172	3.0418	3.0418
2210039B01Rik	3.0418	3.0418	3.0418	3.0418	3.0418	3.0418	3.0418	3.0418	3.0418	3.0418	3.0418	3.0418	3.0418	3.0418	3.0418	3.0418	3.0418	3.0418	3.0418	3.0418	3.0418	3.0418	3.0418	3.0418	3.0418	3.0418	3.0418	3.0418	3.0418	3.0418	3.0418	3.0418	3.0418	3.66229	3.0418	3.0418	3.60058	3.54267	3.0418	3.0418	3.0418	3.0418	3.0418	3.0418	3.0418	3.0418	3.47172	3.0418	3.0418
2210404O09Rik	5.65771	5.76027	5.943	6.02302	5.86167	5.89225	5.79779	5.75333	5.9323	5.95477	6.26533	5.89358	5.6797	5.90869	5.88828	5.93289	5.71847	5.85204	5.43987	5.43733	5.64624	5.76915	5.84408	5.8056	5.82169	5.85557	5.84164	5.82361	6.9977	6.27398	6.18218	6.4783	6.95508	6.85702	7.47807	6.88202	6.74354	6.92107	7.22326	5.88863	5.81823	5.90418	6.20966	5.91815	6.01218	6.19872	6.68288	6.25482	6.16701
2210407C18Rik	3.0418	3.0418	3.0418	3.0418	3.0418	3.0418	3.0418	3.0418	3.0418	3.0418	3.0418	3.0418	3.0418	3.0418	3.0418	3.0418	3.0418	3.0418	3.0418	3.0418	3.0418	3.0418	3.0418	3.0418	3.0418	3.0418	3.0418	3.0418	3.0418	3.0418	3.0418	3.0418	3.0418	3.0418	3.0418	3.0418	3.0418	3.0418	3.0418	3.0418	3.0418	3.0418	3.0418	3.0418	3.0418	3.0418	3.0418	3.0418	3.0418
2210408F21Rik	4.00912	3.65281	3.69955	3.67269	3.76545	3.73856	3.90379	4.28064	4.07678	4.39838	3.71101	3.70711	3.77107	3.9521	4.21858	4.03111	3.55921	3.73882	3.46464	3.0418	4.24981	4.23447	3.53713	3.87509	3.76121	3.60516	4.03907	3.77799	4.05841	4.31715	3.0418	3.94554	4.02426	3.98031	3.57419	3.65758	3.99809	3.74667	3.59585	3.0418	3.88559	3.7423	4.11961	3.55409	3.88922	3.43106	3.64758	3.0418	3.0418
2210408I21Rik	6.97546	6.82437	6.9733	7.10414	6.46216	6.37031	6.53861	6.49678	6.51239	6.24325	6.36444	6.18149	6.51394	6.81751	6.25502	6.43361	6.1862	6.197	6.06077	6.23253	5.68452	5.7031	6.27341	6.32236	6.68041	6.61185	6.17954	6.31178	6.56354	6.11765	5.08591	6.37667	6.4779	6.44907	6.60645	6.5924	6.87302	6.45758	6.97702	6.24271	6.16494	6.28484	6.45795	6.71449	6.38361	6.31386	6.36966	6.25482	6.15297
2210409D07Rik	3.0418	3.0418	3.0418	3.0418	3.0418	3.0418	3.0418	3.0418	3.0418	3.0418	3.0418	3.0418	3.0418	3.0418	3.0418	3.0418	3.0418	3.0418	3.0418	3.0418	3.0418	3.0418	3.0418	3.0418	3.0418	3.0418	3.0418	3.0418	3.0418	3.0418	3.0418	3.0418	3.0418	3.0418	3.0418	3.0418	3.0418	3.0418	3.0418	3.0418	3.0418	3.0418	3.0418	3.0418	3.0418	3.0418	3.0418	3.0418	3.0418
2210409E12Rik	3.0418	3.0418	3.0418	3.0418	3.0418	3.0418	3.0418	3.0418	3.0418	3.0418	3.0418	3.0418	3.0418	3.0418	3.0418	3.0418	3.0418	3.0418	3.0418	3.0418	3.0418	3.0418	3.0418	3.0418	3.0418	3.0418	3.0418	3.0418	3.0418	3.0418	3.0418	3.0418	3.5401	3.0418	3.0418	3.0418	3.43815	3.0418	3.0418	3.0418	3.0418	3.0418	3.0418	3.0418	3.0418	3.0418	3.0418	3.0418	3.0418
2210414B05Rik	3.0418	3.0418	3.5089	3.0418	3.0418	3.0418	3.0418	3.0418	3.0418	3.34126	3.0418	3.0418	3.37071	3.0418	3.0418	3.0418	3.0418	3.0418	3.0418	3.0418	3.37344	3.0418	3.0418	3.0418	3.0418	3.0418	3.0418	3.0418	3.0418	3.0418	3.0418	3.0418	3.0418	3.0418	3.0418	3.0418	3.0418	3.0418	3.0418	3.0418	3.0418	3.7423	3.45728	3.0418	3.0418	3.0418	3.0418	3.0418	3.45704
2210416O15Rik	4.66226	4.59446	4.8063	4.74061	3.76545	3.53686	3.39806	3.63962	3.56755	3.34126	3.71101	4.02925	4.49066	4.11213	3.39016	3.64038	3.7697	3.89146	4.2768	3.45895	3.37344	3.48803	3.73895	3.41859	4.04918	4.14837	3.47394	3.30456	3.0418	3.89182	3.63087	3.74631	3.5401	4.2562	4.40689	4.31616	4.64488	4.0292	3.82067	4.52855	3.9636	4.40529	3.95855	4.52109	4.27865	3.0418	4.53066	4.25419	3.75618
2210417A02Rik	3.48085	3.65281	3.5089	3.92718	3.0418	3.0418	3.0418	3.0418	3.0418	3.46455	3.98009	3.61924	3.0418	3.0418	3.39016	3.50677	3.0418	3.6791	3.46464	3.45895	3.50979	3.35796	3.53713	3.87509	3.40429	3.0418	3.57008	3.73136	3.0418	3.0418	3.0418	3.74631	3.74308	3.98031	3.79057	4.17335	3.72407	4.14066	4.25248	4.38246	3.88559	4.40529	4.25635	3.55409	3.88922	4.05393	4.15559	3.70328	4.04227
2210420H20Rik	3.0418	3.0418	3.0418	3.0418	3.0418	3.0418	3.0418	3.0418	3.0418	3.0418	3.0418	3.0418	3.0418	3.0418	3.0418	3.0418	3.0418	3.0418	3.0418	3.0418	3.0418	3.0418	3.0418	3.0418	3.0418	3.0418	3.0418	3.0418	3.55793	3.0418	3.63087	3.0418	3.0418	3.0418	3.0418	3.0418	3.0418	3.0418	3.0418	3.0418	3.0418	3.0418	3.0418	3.0418	3.0418	3.0418	3.0418	3.0418	3.0418
2300002M23Rik	3.0418	3.0418	3.0418	3.0418	3.0418	3.0418	3.0418	3.0418	3.0418	3.0418	3.0418	3.0418	3.0418	3.0418	3.0418	3.0418	3.0418	3.0418	3.0418	3.0418	3.0418	3.0418	3.0418	3.0418	3.0418	3.0418	3.0418	3.0418	3.0418	3.0418	3.0418	3.0418	3.0418	3.0418	3.0418	3.0418	3.0418	3.0418	3.0418	3.0418	3.0418	3.0418	3.0418	3.0418	3.0418	3.0418	3.0418	3.0418	3.0418
2300003K06Rik	3.0418	3.0418	3.0418	3.0418	3.0418	3.0418	3.0418	3.0418	3.0418	3.0418	3.0418	3.0418	3.0418	3.0418	3.0418	3.0418	3.0418	3.0418	3.0418	3.0418	3.0418	3.0418	3.0418	3.0418	3.0418	3.0418	3.0418	3.0418	3.0418	3.0418	3.0418	3.0418	3.0418	3.0418	3.0418	3.0418	3.0418	3.0418	3.0418	3.0418	3.0418	3.0418	3.0418	3.0418	3.0418	3.0418	3.0418	3.0418	3.0418
2300005B03Rik	3.0418	3.47545	3.0418	3.0418	3.0418	3.0418	3.0418	3.0418	3.0418	3.0418	3.0418	3.0418	3.0418	3.0418	3.0418	3.0418	3.0418	3.0418	3.0418	3.0418	3.37344	3.0418	3.0418	3.0418	3.0418	3.0418	3.0418	3.0418	3.0418	3.0418	3.0418	3.0418	3.0418	3.0418	3.0418	3.0418	3.0418	3.0418	3.0418	3.53069	3.0418	3.0418	3.0418	3.0418	3.0418	3.0418	3.0418	3.0418	3.0418
2300009A05Rik	6.29706	6.02023	6.32307	6.35836	5.86167	5.93992	5.87584	5.90213	5.76268	5.92063	5.91759	6.00988	6.27611	5.98925	5.92377	5.91198	6.01502	5.77498	5.62334	5.88263	5.8278	6.09354	5.84408	5.8922	6.08177	5.85557	5.81265	5.91997	5.985	5.894	7.02352	5.92502	5.26766	6.07783	6.12815	6.27206	6.50427	6.26202	6.05478	6.06644	6.37316	6.20872	6.27594	6.64005	6.65236	6.26893	6.43312	6.25482	6.26159
2310001H17Rik	7.59168	7.78183	7.837	7.5738	5.93978	6.26283	5.26408	5.44635	5.94114	5.77499	6.86925	6.68246	5.87613	6.08016	5.91204	5.95349	6.34839	6.39117	5.16828	5.08242	6.15025	5.84241	6.46346	6.67581	5.808	5.85557	5.48318	5.5996	7.11364	6.66006	8.14731	7.29394	7.64879	7.97349	8.22789	7.65249	7.10793	7.27045	7.7669	8.09305	7.68838	7.78849	7.72895	7.49857	7.67141	7.59583	7.76341	7.61343	7.60018
2310001K24Rik	3.0418	3.0418	3.0418	3.0418	3.0418	3.0418	3.0418	3.0418	3.0418	3.0418	3.0418	3.37666	3.0418	3.0418	3.0418	3.0418	3.0418	3.0418	3.0418	3.45895	3.0418	3.0418	3.0418	3.0418	3.0418	3.0418	3.0418	3.0418	3.0418	3.0418	3.0418	3.0418	3.0418	3.0418	3.0418	3.0418	3.0418	3.0418	3.59585	3.53069	3.42345	3.0418	3.0418	3.0418	3.58233	3.0418	3.0418	3.0418	3.0418
2310002D06Rik	3.0418	3.0418	3.0418	3.0418	3.0418	3.0418	3.0418	3.0418	3.0418	3.0418	3.0418	3.0418	3.0418	3.0418	3.0418	3.0418	3.0418	3.0418	3.0418	3.0418	3.0418	3.0418	3.0418	3.0418	3.0418	3.0418	3.0418	3.0418	3.0418	3.0418	3.0418	3.0418	3.0418	3.0418	3.57419	3.0418	3.0418	3.0418	3.0418	3.0418	3.0418	3.0418	3.0418	3.0418	3.0418	3.0418	3.0418	3.0418	3.0418
2310002F09Rik	3.0418	3.0418	3.0418	3.0418	3.55615	3.0418	3.0418	3.0418	3.56755	3.34126	3.0418	3.0418	3.50595	3.0418	3.53327	3.50677	3.55921	3.0418	3.46464	3.0418	3.50979	3.48803	3.53713	3.0418	3.0418	3.44142	3.47394	3.56516	3.0418	3.73911	3.0418	3.74631	4.02426	4.15555	4.08947	3.0418	3.43815	3.0418	3.0418	3.72997	3.0418	4.02319	3.62738	3.0418	3.0418	3.81346	3.47172	3.0418	3.45704
2310002J15Rik	3.0418	3.0418	3.5089	3.0418	3.0418	3.39271	3.0418	3.0418	3.34646	3.34126	3.0418	3.0418	3.0418	3.0418	3.39016	3.31103	3.0418	3.0418	3.0418	3.0418	3.61373	3.0418	3.53713	3.0418	3.55311	3.0418	3.34794	3.49566	3.0418	3.73911	3.0418	3.0418	3.0418	3.0418	3.0418	3.0418	3.43815	3.0418	3.0418	3.53069	3.0418	3.0418	3.62738	3.0418	3.0418	3.59066	3.78108	3.0418	3.0418
2310002L09Rik	3.0418	3.0418	3.0418	3.0418	3.0418	3.0418	3.0418	3.0418	3.0418	3.0418	3.0418	3.0418	3.0418	3.0418	3.0418	3.0418	3.0418	3.0418	3.0418	3.0418	3.0418	3.0418	3.0418	3.0418	3.0418	3.0418	3.0418	3.0418	3.0418	3.0418	3.0418	3.0418	3.0418	3.0418	3.0418	3.0418	3.0418	3.0418	3.0418	3.0418	3.0418	3.0418	3.0418	3.0418	3.0418	3.0418	3.0418	3.0418	3.0418
2310003H01Rik	8.41527	8.58357	8.60363	8.44081	10.2717	9.95805	10.0692	9.98281	9.97507	10.1845	9.63277	10.0794	10.4452	9.7644	10.2654	10.0438	10.2371	10.1973	10.6428	10.6103	10.7269	10.9475	9.65032	10.0823	10.0052	10.0488	10.6069	10.2475	8.30684	9.43084	9.22465	8.67332	8.54875	8.71093	8.4595	8.81515	8.42632	8.61573	8.12594	8.84041	8.88244	8.80081	8.72602	8.59118	8.84423	8.84251	8.83798	8.94514	8.65479
2310005A03Rik	3.0418	3.0418	3.0418	3.0418	3.0418	3.0418	3.0418	3.0418	3.0418	3.0418	3.0418	3.0418	3.0418	3.0418	3.0418	3.0418	3.0418	3.0418	3.0418	3.0418	3.0418	3.0418	3.0418	3.0418	3.0418	3.0418	3.0418	3.0418	3.0418	3.0418	3.0418	3.0418	3.0418	3.0418	3.0418	3.0418	3.0418	3.0418	3.0418	3.0418	3.0418	3.0418	3.0418	3.0418	3.0418	3.0418	3.0418	3.0418	3.0418
2310005E17Rik	3.0418	3.0418	3.0418	3.0418	3.0418	3.0418	3.0418	3.0418	3.0418	3.0418	3.0418	3.0418	3.0418	3.0418	3.0418	3.0418	3.0418	3.0418	3.0418	3.0418	3.0418	3.0418	3.0418	3.0418	3.0418	3.0418	3.0418	3.0418	3.0418	3.0418	3.0418	3.0418	3.0418	3.0418	3.0418	3.0418	3.0418	3.0418	3.0418	3.0418	3.0418	3.0418	3.0418	3.0418	3.0418	3.0418	3.0418	3.0418	3.0418
2310005G13Rik	3.48085	3.0418	3.0418	3.0418	3.0418	3.0418	3.0418	3.0418	3.0418	3.0418	3.0418	3.0418	3.0418	3.0418	3.39016	3.0418	3.0418	3.0418	3.0418	3.0418	3.37344	3.0418	3.0418	3.0418	3.0418	3.0418	3.34794	3.30456	3.0418	3.0418	3.0418	3.45123	3.5401	3.54972	3.0418	3.47886	3.0418	3.74667	3.0418	3.53069	3.0418	3.0418	3.45728	3.0418	3.0418	3.0418	3.0418	3.0418	3.0418
2310007B03Rik	3.0418	3.0418	3.0418	3.48967	3.0418	3.0418	3.0418	3.0418	3.0418	3.0418	3.0418	3.0418	3.0418	3.0418	3.0418	3.0418	3.0418	3.32866	3.0418	3.0418	3.0418	3.0418	3.0418	3.0418	3.0418	3.0418	3.0418	3.0418	3.0418	3.0418	3.0418	3.0418	3.0418	3.0418	3.0418	3.0418	3.0418	3.0418	3.0418	3.0418	3.0418	3.0418	3.0418	3.0418	3.0418	3.0418	3.0418	3.0418	3.45704
2310007L24Rik	4.66226	4.48831	4.32591	4.02797	3.67012	3.73856	3.65579	3.77143	4.11722	3.97417	3.71101	3.70711	3.50595	3.62318	4.12076	4.29505	3.99741	3.53704	4.20988	4.04673	4.11895	4.2714	3.89162	3.41859	3.66641	3.83361	3.99431	4.45018	4.17288	4.6775	3.86928	3.45123	3.5401	4.10089	3.57419	3.65758	5.59135	3.90095	3.71833	4.77391	3.57998	4.74474	4.58227	3.55409	4.67285	4.24162	3.78108	3.51157	3.62704
2310008N11Rik	3.0418	3.0418	3.0418	3.0418	3.0418	3.0418	3.0418	3.0418	3.0418	3.0418	3.0418	3.0418	3.0418	3.0418	3.0418	3.0418	3.0418	3.0418	3.0418	3.0418	3.0418	3.0418	3.0418	3.0418	3.0418	3.0418	3.0418	3.0418	3.0418	3.0418	3.0418	3.45123	3.74308	3.66229	3.0418	3.65758	3.0418	3.54267	3.0418	3.0418	3.0418	3.0418	3.0418	3.0418	3.0418	3.0418	3.89244	3.96943	3.86398
2310009A05Rik	6.73509	6.81474	6.96322	7.03515	5.30812	5.51843	5.46633	5.82973	5.76268	5.55698	5.51259	5.32858	5.20911	5.61396	5.58081	5.3987	5.31945	5.54547	5.46421	5.23048	5.48136	5.32896	5.53539	5.26425	5.4483	5.37661	5.12945	5.26834	6.92334	6.52729	6.43774	7.0749	7.28483	7.34887	7.64299	7.09069	6.88074	7.03622	7.15623	6.85969	7.25574	6.81875	7.64207	6.71449	6.95549	7.0681	6.8953	6.80583	7.2085
2310009B15Rik	5.63496	5.93286	5.78924	5.80895	5.13631	5.15461	5.30322	5.0473	5.13686	5.00749	5.0187	5.2775	5.17334	5.43874	5.14141	4.83132	5.10011	5.42576	4.9732	5.11342	5.13258	4.91169	4.54671	5.09859	5.21398	5.06712	4.81813	5.10855	5.41194	5.68487	5.55606	5.7533	6.06726	5.50463	5.68505	5.77706	5.70238	6.0123	5.78666	5.81561	5.47603	6.0207	5.803	5.50485	6.12693	5.79869	5.78189	5.86973	6.422
2310010J17Rik	6.08181	5.80053	6.30712	6.19269	4.448	4.87464	4.63487	4.40283	4.72451	4.72032	4.49006	4.96504	4.79629	4.99871	4.69574	4.67892	4.60861	4.28771	4.74206	4.04673	4.62326	4.71094	4.39908	4.7182	4.59157	4.65696	4.45549	4.55077	5.41194	5.25686	6.59263	5.80709	6.26882	5.96131	6.19757	6.43487	5.80509	5.84294	5.95656	5.93525	5.80301	5.82927	5.98968	6.04018	5.73356	5.64676	5.82085	5.65419	5.5859
2310011J03Rik	9.65279	9.68874	9.78602	9.74756	9.03086	9.15013	9.13693	9.11997	9.37423	9.49543	8.94418	9.25153	9.38388	9.1499	9.48958	9.4672	9.31345	9.28677	9.48389	9.51682	9.84388	9.7045	8.95622	9.2741	9.29905	9.22292	9.51667	9.67572	8.94404	9.54132	8.93563	9.07994	9.07214	9.19259	9.14872	9.30837	9.1734	9.31738	8.82081	9.59885	9.52189	9.48042	9.4369	9.24087	9.29206	9.4142	9.26516	9.32993	9.39462
2310014L17Rik	5.82732	6.02023	5.66788	6.00486	6.00169	6.16656	5.72919	5.84819	5.55761	5.45167	6.04334	6.00988	6.26799	6.24601	5.42197	5.69989	5.52498	5.71191	6.30421	6.0456	5.31015	5.64551	5.84408	5.96046	6.08177	6.28386	5.54393	5.69677	4.60506	5.40364	4.04864	5.11013	5.5156	5.01912	5.26789	5.81747	6.03279	5.86844	5.9995	5.79039	5.70793	5.80337	5.2777	5.96825	5.81248	5.1045	6.12966	5.75417	5.37961
2310015A10Rik	6.25363	6.28209	6.04328	5.91036	7.0187	7.10226	6.9416	7.09995	6.74982	6.76535	6.97695	6.96709	7.07732	6.98198	6.85496	6.7455	7.69894	7.75753	7.32807	7.3367	7.7217	7.8342	6.60199	7.26025	7.08935	6.71214	6.65333	6.47766	7.14666	7.01927	8.30815	7.19851	7.67709	7.41153	7.36322	7.11476	6.51426	7.19325	7.32107	7.13038	7.01747	7.34493	7.50652	7.35766	7.54134	7.92472	7.10365	6.96762	7.40306
2310015B20Rik	3.0418	3.0418	3.0418	3.0418	3.0418	3.0418	3.0418	3.0418	3.0418	3.0418	3.0418	3.0418	3.0418	3.0418	3.0418	3.0418	3.0418	3.0418	3.0418	3.0418	3.0418	3.58724	3.0418	3.0418	3.0418	3.0418	3.0418	3.0418	3.0418	3.0418	3.63087	3.0418	3.0418	3.0418	3.0418	3.0418	3.0418	3.0418	3.0418	3.0418	3.0418	3.53954	3.0418	3.55409	3.0418	3.59066	3.0418	3.51157	3.0418
2310015D24Rik	3.0418	3.0418	3.0418	3.0418	3.0418	3.0418	3.0418	3.0418	3.0418	3.0418	3.0418	3.0418	3.0418	3.0418	3.0418	3.0418	3.0418	3.0418	3.0418	3.0418	3.0418	3.0418	3.0418	3.0418	3.0418	3.0418	3.0418	3.0418	3.0418	3.0418	3.0418	3.0418	3.0418	3.0418	3.57419	3.0418	3.60058	3.0418	3.43477	3.0418	3.0418	3.0418	3.0418	3.0418	3.0418	3.0418	3.47172	3.0418	3.0418
2310016D03Rik	3.0418	3.0418	3.0418	3.0418	3.0418	3.0418	3.0418	3.0418	3.0418	3.0418	3.0418	3.0418	3.0418	3.0418	3.0418	3.0418	3.0418	3.0418	3.0418	3.0418	3.0418	3.0418	3.0418	3.0418	3.0418	3.0418	3.0418	3.0418	3.0418	3.0418	3.0418	3.0418	3.0418	3.0418	3.0418	3.0418	3.0418	3.0418	3.0418	3.0418	3.0418	3.0418	3.0418	3.0418	3.0418	3.0418	3.0418	3.0418	3.0418
2310020H05Rik	3.0418	3.0418	3.0418	3.0418	3.0418	3.0418	3.0418	3.0418	3.0418	3.0418	3.0418	3.0418	3.0418	3.0418	3.0418	3.0418	3.0418	3.0418	3.0418	3.0418	3.0418	3.0418	3.0418	3.0418	3.0418	3.0418	3.0418	3.0418	3.0418	3.0418	3.0418	3.0418	3.0418	3.0418	3.0418	3.0418	3.0418	3.0418	3.0418	3.0418	3.0418	3.0418	3.0418	3.0418	3.0418	3.0418	3.0418	3.70328	3.0418
2310022A10Rik	7.58591	7.506	7.80923	7.87399	10.4579	10.3926	10.1361	10.2121	10.0795	10.0329	10.2067	10.4287	10.4682	10.1965	10.1078	10.0434	10.189	10.2271	9.91716	9.97804	10.0969	10.2024	10.1596	10.174	10.1772	10.3304	10.1634	10.03	9.29915	9.95178	8.75676	9.8814	9.85991	9.83058	9.61938	9.974	9.64626	10.0336	9.65861	10.0524	10.0527	9.82399	9.96953	9.86976	10.0148	9.79829	10.2494	10.2398	9.87384
2310022B05Rik	7.54486	7.11819	7.47622	7.50544	9.03959	9.08917	9.08288	8.77723	9.27898	9.20461	8.61955	9.21304	9.21462	9.143	9.10826	9.12616	9.29019	9.34229	9.42229	9.22745	9.02561	9.0653	8.56237	9.5695	8.98162	9.08612	9.14109	9.26092	8.58429	9.0264	7.95006	8.36672	8.41667	8.53148	8.43605	7.7426	8.0743	8.18961	7.58916	8.658	8.45425	8.77821	8.69043	7.78648	7.81715	8.95553	8.03492	8.63882	8.75228
2310030A07Rik	3.0418	3.0418	3.0418	3.0418	3.0418	3.0418	3.0418	3.0418	3.0418	3.0418	3.0418	3.0418	3.0418	3.45428	3.39016	3.0418	3.0418	3.0418	3.0418	3.0418	3.0418	3.0418	3.0418	3.0418	3.0418	3.0418	3.57008	3.0418	3.0418	3.0418	3.0418	3.0418	3.0418	3.0418	3.0418	3.0418	3.0418	3.0418	3.0418	3.0418	3.42345	3.0418	3.0418	3.0418	3.70192	3.0418	3.0418	3.51157	3.45704
2310030G06Rik	3.0418	3.0418	3.0418	3.0418	3.0418	3.0418	3.0418	3.0418	3.0418	3.0418	3.0418	3.0418	3.0418	3.0418	3.0418	3.0418	3.0418	3.0418	3.0418	3.0418	3.0418	3.0418	3.0418	3.0418	3.0418	3.0418	3.0418	3.0418	3.0418	3.0418	3.0418	3.0418	3.0418	3.0418	3.0418	3.47886	3.0418	3.0418	3.0418	3.0418	3.0418	3.0418	3.0418	3.0418	3.0418	3.0418	3.0418	3.0418	3.0418
2310033P09Rik	8.34876	8.40993	8.38042	8.65934	9.03086	9.12504	8.94338	8.94202	8.96133	9.06863	9.11822	8.98711	8.8085	8.78112	8.9982	8.83316	8.98949	9.13408	8.9845	9.00406	8.91889	8.79557	9.02843	8.83235	8.73666	8.74697	8.9094	8.95089	8.78236	9.26822	9.32516	9.05298	8.73504	9.14081	8.83419	9.17595	8.41314	9.42652	8.96803	9.20266	9.23177	8.96133	9.03309	8.64135	8.8661	9.03401	9.0004	9.05915	9.71192
2310034C09Rik	3.0418	3.0418	3.0418	3.0418	3.0418	3.0418	3.0418	3.0418	3.0418	3.0418	3.0418	3.0418	3.0418	3.0418	3.0418	3.0418	3.0418	3.0418	3.0418	3.0418	3.0418	3.0418	3.0418	3.0418	3.0418	3.0418	3.0418	3.0418	3.0418	3.0418	3.0418	3.0418	3.0418	3.0418	3.0418	3.0418	3.0418	3.0418	3.0418	3.0418	3.0418	3.0418	3.0418	3.0418	3.0418	3.0418	3.0418	3.0418	3.0418
2310034G01Rik	3.0418	3.0418	3.0418	3.0418	3.0418	3.0418	3.0418	3.0418	3.0418	3.0418	3.0418	3.0418	3.0418	3.0418	3.0418	3.0418	3.0418	3.0418	3.0418	3.0418	3.0418	3.0418	3.0418	3.0418	3.0418	3.0418	3.0418	3.0418	4.27493	3.89182	4.04864	3.85269	4.23421	4.2562	4.08947	4.31616	4.07172	4.14066	3.99018	3.0418	3.0418	3.0418	3.0418	3.0418	3.0418	3.0418	4.4767	4.40595	4.43091
2310034O05Rik	3.0418	3.0418	3.0418	3.0418	3.0418	3.0418	3.0418	3.0418	3.0418	3.0418	3.0418	3.0418	3.0418	3.0418	3.0418	3.0418	3.0418	3.0418	3.0418	3.0418	3.0418	3.0418	3.0418	3.0418	3.0418	3.0418	3.0418	3.0418	3.0418	3.0418	3.0418	3.74631	3.0418	3.66229	3.0418	3.65758	3.0418	3.54267	3.59585	3.0418	3.0418	3.0418	3.0418	3.0418	3.0418	3.0418	3.64758	4.33287	4.1898
2310035C23Rik	9.60944	9.72114	9.80861	9.80675	9.79714	9.79507	9.77637	9.80799	9.95592	9.85352	9.82006	9.90129	9.68826	9.74515	9.94006	9.95502	9.848	9.72245	9.7975	9.79198	10.0992	10.076	9.87481	9.93603	9.82323	9.79782	9.89725	9.74138	9.97603	9.68062	10.7866	9.7068	9.85063	9.73167	9.79912	9.64122	9.87298	9.62094	9.72824	9.56287	9.51047	9.6411	9.64208	9.67978	9.76519	9.72717	9.42215	9.36119	9.26045
2310036O22Rik	11.7125	11.7293	11.7791	11.6996	9.97601	9.82808	10.0055	10.1258	10.2177	10.2855	10.6921	10.0699	10.0067	10.2664	10.3028	10.1884	9.94443	9.98818	10.078	10.022	10.1141	9.94201	10.276	9.90916	10.0768	10.1992	10.0306	10.3546	10.4711	10.9041	10.7214	10.804	10.4841	10.8188	10.6447	10.645	10.6735	10.7489	10.4362	11.1765	11.0725	11.0344	10.8976	11.0081	11.0782	10.9982	10.9441	11.086	11.1647
2310039H08Rik	7.18118	7.31498	7.68634	7.63906	5.91423	6.10546	6.17111	6.4012	5.99304	6.05244	6.48663	6.14513	6.30812	6.21969	6.18895	6.11427	6.28973	6.25437	6.46559	6.23253	6.26263	6.14371	6.41411	6.06315	6.11526	6.18523	5.92512	6.32679	6.68884	7.20397	6.48375	6.64276	6.342	6.87624	6.34738	6.95501	7.0881	7.22269	6.67064	6.98514	7.26667	7.05287	7.03883	7.50693	7.49523	7.18072	7.2991	7.39628	7.39717
2310039L15Rik	3.0418	3.0418	3.0418	3.0418	3.0418	3.0418	3.0418	3.0418	3.0418	3.0418	3.0418	3.0418	3.0418	3.0418	3.0418	3.0418	3.0418	3.0418	3.0418	3.0418	3.0418	3.0418	3.0418	3.0418	3.0418	3.0418	3.0418	3.0418	3.0418	3.0418	3.0418	3.0418	3.0418	3.0418	3.0418	3.0418	3.0418	3.0418	3.0418	3.0418	3.0418	3.0418	3.0418	3.0418	3.0418	3.0418	3.0418	3.0418	3.0418
2310040G24Rik	4.61223	4.69157	4.53078	4.41172	3.67012	3.64666	3.54436	4.34354	3.78132	4.0996	3.0418	3.85314	4.06272	4.03583	3.9506	3.79578	4.12	3.73882	3.63768	3.45895	3.8455	3.58724	4.01857	3.69079	3.98642	3.83361	3.65069	4.04077	4.27493	4.2277	3.63087	4.23952	4.23421	4.4711	4.2071	4.00486	4.561	4.41337	3.99018	5.19283	4.55028	4.23294	4.31816	4.44271	4.10497	3.98149	4.58214	4.47433	3.95803
2310042E22Rik	3.0418	3.0418	3.0418	3.0418	3.0418	3.0418	3.0418	3.0418	3.0418	3.0418	3.0418	3.0418	3.0418	3.0418	3.0418	3.0418	3.0418	3.0418	3.0418	3.0418	3.0418	3.0418	3.0418	3.0418	3.0418	3.0418	3.0418	3.0418	3.0418	3.0418	3.0418	3.0418	3.0418	3.0418	3.0418	3.0418	3.0418	3.0418	3.0418	3.53069	3.0418	3.0418	3.0418	3.0418	3.0418	3.0418	3.0418	3.51157	3.0418
2310043L19Rik	3.0418	3.0418	3.0418	3.0418	3.0418	3.0418	3.0418	3.0418	3.0418	3.0418	3.0418	3.37666	3.0418	3.0418	3.0418	3.31103	3.0418	3.32866	3.46464	3.0418	3.37344	3.0418	3.0418	3.57317	3.0418	3.0418	3.34794	3.0418	3.0418	3.0418	3.0418	3.0418	3.0418	3.0418	3.0418	3.0418	3.0418	3.0418	3.0418	3.0418	3.42345	3.0418	3.45728	3.0418	3.0418	3.0418	3.0418	3.51157	3.0418
2310043O21Rik	3.0418	3.0418	3.0418	3.0418	3.0418	3.0418	3.0418	3.0418	3.0418	3.0418	3.0418	3.0418	3.0418	3.0418	3.0418	3.0418	3.0418	3.0418	3.0418	3.0418	3.0418	3.0418	3.0418	3.0418	3.0418	3.0418	3.0418	3.0418	3.0418	3.0418	3.0418	3.0418	3.0418	3.0418	3.0418	3.0418	3.0418	3.0418	3.43477	3.0418	3.0418	3.0418	3.0418	3.0418	3.0418	3.0418	3.0418	3.0418	3.0418
2310045N01Rik	7.45272	7.52378	7.6111	7.54932	7.55878	7.58781	7.62812	7.73729	7.93936	8.05438	7.27552	7.52445	7.5942	7.37964	7.96416	8.02933	7.73206	7.73777	7.81788	7.57088	8.58451	8.45044	7.40925	7.66622	7.61018	7.64773	8.02238	8.01319	7.77895	8.22263	8.39429	8.27634	7.99059	8.44014	7.99094	8.07998	7.63944	8.1646	7.93962	7.99377	8.35296	8.06966	8.38665	7.85356	7.94948	8.06143	8.05906	8.08576	8.61236
2310047M10Rik	8.73202	8.76613	8.38419	8.44081	8.52369	8.46207	8.38041	8.18093	8.04995	8.36623	8.28585	8.58312	8.66303	8.06432	8.13994	8.01174	8.35908	8.40795	8.44416	8.36171	8.48765	8.33448	8.07223	8.42833	8.21126	8.17507	8.07913	8.09358	7.78594	8.11947	7.34187	8.18323	8.09909	8.17501	8.03532	7.64701	7.25741	7.85636	7.5036	7.97745	7.75967	8.04281	7.77957	8.20634	8.11397	8.31764	7.67242	7.70778	8.03793
2310050C09Rik	3.0418	3.0418	3.0418	3.48967	3.0418	3.0418	3.0418	3.0418	3.0418	3.0418	3.0418	3.0418	3.0418	3.0418	3.0418	3.0418	3.0418	3.0418	3.0418	3.0418	3.0418	3.0418	3.0418	3.0418	3.0418	3.0418	3.34794	3.0418	3.0418	3.0418	3.0418	3.0418	3.0418	3.0418	3.0418	3.0418	3.0418	3.0418	3.0418	3.0418	3.0418	3.0418	3.0418	3.0418	3.0418	3.0418	3.47172	3.0418	3.0418
2310057J18Rik	3.0418	3.0418	3.0418	3.0418	3.0418	3.0418	3.0418	3.0418	3.0418	3.34126	3.0418	3.0418	3.0418	3.0418	3.0418	3.0418	3.0418	3.0418	3.0418	3.0418	3.0418	3.0418	3.0418	3.0418	3.0418	3.0418	3.0418	3.30456	3.0418	3.0418	3.0418	3.0418	3.0418	3.0418	3.0418	3.0418	3.0418	3.0418	3.0418	3.0418	3.0418	3.0418	3.0418	3.0418	3.0418	3.0418	3.0418	3.0418	3.0418
2310057M21Rik	8.63769	8.75615	8.90044	8.87634	8.70476	8.62845	8.66876	8.36492	8.45366	8.42723	8.72176	8.74778	8.64455	8.61392	8.47159	8.39026	8.47002	8.53414	8.89446	8.79471	8.33775	8.28755	8.56611	8.35301	8.60725	8.65435	8.53671	8.4429	8.30684	8.45018	7.82262	8.35205	8.41247	8.36085	8.53206	8.73229	8.81101	8.61941	8.53294	8.59881	8.54216	8.47108	8.47021	8.62226	8.68109	8.6392	8.90161	8.58355	8.58163
2310057N15Rik	3.0418	3.0418	3.0418	3.0418	3.0418	3.0418	3.0418	3.0418	3.0418	3.0418	3.0418	3.0418	3.0418	3.0418	3.0418	3.0418	3.0418	3.0418	3.0418	3.0418	3.0418	3.0418	3.0418	3.0418	3.0418	3.0418	3.0418	3.0418	3.0418	3.0418	3.0418	3.0418	3.0418	3.0418	3.0418	3.0418	3.0418	3.0418	3.0418	3.0418	3.0418	3.0418	3.0418	3.0418	3.0418	3.0418	3.0418	3.0418	3.0418
2310061I04Rik	6.85552	6.71473	6.76851	7.11254	9.09368	9.01872	9.06259	9.00582	8.64921	8.73528	8.61955	8.94727	9.00484	8.99175	8.7164	8.71564	8.98645	8.81834	9.02453	9.01377	8.77223	8.60856	8.85292	8.94746	9.15436	9.0328	8.88689	8.99184	8.164	8.74561	8.18233	8.56298	8.8697	8.51936	8.65086	8.8912	9.06129	8.9055	8.67865	9.06024	8.87177	9.00369	8.79468	9.12903	9.19606	8.86509	9.25649	9.08278	9.09449
2310061J03Rik	5.20645	5.30349	5.44803	5.36549	4.448	4.43718	4.457	4.40283	4.5826	4.74172	4.61642	4.57776	4.89044	4.57203	4.56964	4.89334	4.77483	4.61351	4.55873	4.72132	5.68452	5.37286	4.84912	4.68337	4.59157	4.69697	4.79715	4.76115	4.67426	4.90182	6.94385	4.69307	4.91132	4.8901	4.85131	4.91742	4.93118	4.62995	4.74714	5.44482	4.77189	5.00822	5.22302	5.00912	5.12931	5.13105	4.80993	5.08093	4.97682
2310061N02Rik	3.0418	3.0418	3.0418	3.0418	3.0418	3.0418	3.0418	3.0418	3.0418	3.0418	3.0418	3.0418	3.0418	3.0418	3.0418	3.0418	3.0418	3.0418	3.0418	3.0418	3.0418	3.0418	3.0418	3.0418	3.0418	3.0418	3.0418	3.0418	3.0418	3.0418	3.0418	3.0418	3.0418	3.0418	3.0418	3.0418	3.0418	3.0418	3.0418	3.0418	3.0418	3.0418	3.0418	3.0418	3.0418	3.0418	3.0418	3.0418	3.0418
2310065F04Rik	3.0418	3.0418	3.0418	3.0418	3.0418	3.0418	3.0418	3.0418	3.0418	3.0418	3.0418	3.0418	3.0418	3.62318	3.0418	3.31103	3.0418	3.0418	3.46464	3.0418	3.0418	3.0418	3.0418	3.0418	3.0418	3.44142	3.47394	3.0418	3.0418	3.0418	3.0418	3.0418	3.0418	3.0418	3.0418	3.0418	3.0418	3.0418	3.0418	3.88077	3.57998	3.53954	3.75658	3.0418	3.0418	3.59066	3.47172	3.0418	3.45704
2310067B10Rik	9.57059	9.4122	9.32162	9.3983	11.594	11.4247	11.0355	10.8098	11.0325	11.1681	11.0933	11.439	11.3903	10.8574	11.1962	11.0108	11.441	11.3882	11.1843	11.2573	11.8696	11.9365	11.056	11.5149	10.9099	11.0567	11.4331	11.0283	9.59385	10.5187	9.06129	10.2243	10.0555	10.2569	9.84077	10.0558	9.62699	9.92614	9.5889	10.1563	10.1523	10.3103	10.2046	9.83537	10.2484	10.3496	10.0573	10.424	10.0194
2310068J16Rik	4.32166	3.78741	4.53078	4.20014	3.40646	4.2268	4.09008	3.88141	4.47714	4.36924	3.98009	3.97471	4.39061	4.24802	4.60248	4.48236	4.53482	4.16272	4.05998	4.261	4.73313	4.58281	3.0418	4.02253	4.39883	4.14837	4.39695	4.40719	4.45255	4.8495	4.54259	4.17442	4.4834	4.15555	4.2071	4.31616	4.07172	4.33038	4.19352	4.52855	4.27351	4.23294	4.31816	4.35818	4.55641	4.86935	4.76774	4.59954	4.1898
2310069B03Rik	3.0418	3.0418	3.0418	3.0418	3.0418	3.0418	3.0418	3.0418	3.0418	3.0418	3.0418	3.0418	3.0418	3.0418	3.0418	3.0418	3.0418	3.0418	3.0418	3.0418	3.0418	3.0418	3.0418	3.0418	3.40429	3.0418	3.0418	3.30456	3.0418	3.0418	3.0418	3.0418	3.0418	3.0418	3.0418	3.0418	3.0418	3.0418	3.0418	3.0418	3.0418	3.0418	3.62738	3.0418	3.0418	3.43106	3.0418	3.0418	3.0418
2310069G16Rik	3.0418	3.0418	3.0418	3.0418	3.40646	3.0418	3.0418	3.63962	3.0418	3.0418	3.71101	3.37666	3.37071	3.0418	3.0418	3.0418	3.0418	3.0418	3.0418	3.0418	3.0418	3.0418	3.53713	3.0418	3.0418	3.0418	3.0418	3.49566	3.0418	3.0418	3.0418	3.45123	3.5401	3.0418	3.0418	3.47886	3.0418	3.0418	3.59585	3.0418	3.42345	3.0418	3.0418	3.0418	3.0418	3.0418	3.0418	3.0418	3.45704
2310079G19Rik	3.0418	3.0418	3.5089	3.0418	3.0418	3.0418	3.0418	3.0418	3.34646	3.0418	3.0418	3.0418	3.0418	3.0418	3.0418	3.0418	3.40864	3.0418	3.0418	3.0418	3.0418	3.0418	3.0418	3.0418	3.0418	3.0418	3.0418	3.0418	3.0418	3.0418	3.0418	3.0418	3.0418	3.0418	3.0418	3.0418	3.0418	3.0418	3.0418	3.0418	3.0418	3.0418	3.0418	3.0418	3.0418	3.0418	3.0418	3.0418	3.0418
2310081J21Rik	3.0418	3.0418	3.0418	3.0418	3.0418	3.0418	3.0418	3.0418	3.0418	3.0418	3.0418	3.0418	3.0418	3.0418	3.0418	3.0418	3.0418	3.0418	3.0418	3.0418	3.0418	3.0418	3.0418	3.0418	3.0418	3.0418	3.0418	3.0418	3.0418	3.0418	3.0418	3.0418	3.0418	3.0418	3.0418	3.0418	3.0418	3.0418	3.0418	3.0418	3.0418	3.0418	3.0418	3.0418	3.0418	3.0418	3.0418	3.0418	3.0418
2410002F23Rik	8.82789	8.86225	9.20723	9.05409	10.3362	10.3248	10.1185	10.0041	9.89801	9.98049	9.78213	10.0506	10.2725	9.80432	9.93864	9.82838	10.2172	10.1706	10.1754	10.2428	10.1417	10.1863	9.81797	9.8227	9.87875	9.92123	10.0489	9.83435	8.82366	9.37438	10.2616	9.33245	9.43685	9.09119	9.03164	9.10587	9.45892	9.35321	9.37445	9.3408	9.00473	9.20349	9.20268	8.91672	9.30946	9.10527	9.72313	9.54086	9.91446
2410003L11Rik	4.17829	4.08514	4.16255	4.41172	3.0418	3.39271	3.39806	3.0418	3.47186	3.46455	3.0418	3.37666	3.0418	3.0418	3.39016	3.0418	3.0418	3.0418	3.0418	3.0418	3.0418	3.35796	3.89162	3.57317	3.40429	3.0418	3.0418	3.49566	3.92661	3.53725	3.0418	4.1045	3.89661	5.06724	4.65032	4.00486	3.99809	3.74667	3.82067	3.53069	4.8051	3.0418	3.75658	4.16478	3.0418	3.90206	3.78108	4.07468	3.75618
2410004B18Rik	8.89233	8.88531	9.17716	9.20647	8.00493	8.04149	8.14842	8.06969	7.62824	7.73518	8.48795	8.12956	7.99074	8.20694	7.62246	7.69632	8.09082	8.13014	8.06076	8.24779	7.37106	7.34139	8.30486	7.92653	8.20361	8.12003	7.52329	7.89351	8.09816	8.09378	8.55786	8.37836	8.48222	8.23555	8.58844	8.84175	8.53983	8.65216	8.60991	8.62696	8.75464	8.2866	8.62405	8.39816	8.39798	8.35801	8.8027	8.56689	8.96162
2410004I01Rik	3.0418	3.0418	3.0418	3.48967	3.0418	3.0418	3.0418	3.0418	3.0418	3.0418	3.0418	3.0418	3.0418	3.0418	3.0418	3.0418	3.0418	3.0418	3.0418	3.0418	3.0418	3.0418	3.0418	3.0418	3.0418	3.0418	3.47394	3.0418	3.0418	3.0418	3.0418	3.0418	3.0418	3.0418	3.0418	3.0418	3.0418	3.0418	3.0418	3.0418	3.0418	3.0418	3.0418	3.0418	3.0418	3.0418	3.47172	3.0418	3.0418
2410004N09Rik	8.51266	8.49037	8.8523	8.6334	6.99487	6.90923	6.86207	6.90566	6.81301	6.78422	6.8467	6.76804	6.78701	7.02031	6.69526	6.6195	6.66464	6.88033	6.67266	6.87178	6.28734	6.16814	6.86869	6.56749	6.84117	7.0891	6.38194	6.7606	7.84068	7.82058	8.08205	7.80624	7.1995	7.64545	7.42179	8.20821	8.10086	8.06541	8.17898	8.29089	8.1963	8.12191	7.90092	8.21146	7.90083	7.72504	8.47833	8.28648	8.87981
2410004P03Rik	4.50506	4.3708	4.39865	3.81149	4.11386	4.31619	4.29026	4.28064	4.94765	4.84336	4.73025	4.30124	4.425	4.03583	4.63441	4.78263	3.99741	4.59159	4.50792	4.63415	5.34296	5.79048	4.12893	5.30797	4.44018	4.48133	4.63891	4.88322	4.45255	3.89182	3.86928	4.23952	3.5401	4.71501	4.40689	4.70336	3.82725	4.75445	4.45902	4.52855	4.8051	5.34117	4.48417	4.26617	4.77874	4.69583	4.53066	4.71237	4.31747
2410006H16Rik	11.5088	11.2908	11.5013	11.3141	8.73015	8.88463	8.38696	8.44434	8.39797	8.46409	8.42115	8.6678	8.51993	8.4696	8.45184	8.38157	8.29655	8.31624	8.45885	8.36779	8.25342	8.10596	8.37048	8.75709	8.47569	8.4279	8.21194	8.61411	10.4338	10.4106	10.1458	11.2627	10.6474	10.7013	10.566	11.0529	9.50809	11.0257	9.93357	10.2833	10.0361	10.1636	10.1419	11.0066	10.5389	9.99276	10.5587	10.3373	10.699
2410007B07Rik	3.0418	3.0418	3.0418	3.0418	3.0418	3.0418	3.0418	3.0418	3.0418	3.0418	3.0418	3.0418	3.0418	3.0418	3.0418	3.0418	3.0418	3.0418	3.0418	3.0418	3.0418	3.0418	3.0418	3.0418	3.0418	3.0418	3.0418	3.0418	3.0418	3.0418	4.04864	3.0418	3.5401	3.0418	3.0418	3.0418	3.0418	3.0418	3.43477	3.0418	3.0418	3.0418	3.0418	3.0418	3.0418	3.0418	3.0418	3.0418	3.0418
2410012E07Rik	3.0418	3.0418	3.0418	3.0418	3.0418	3.0418	3.0418	3.0418	3.0418	3.0418	3.0418	3.0418	3.0418	3.0418	3.0418	3.0418	3.0418	3.0418	3.0418	3.0418	3.0418	3.0418	3.0418	3.0418	3.0418	3.0418	3.0418	3.0418	3.0418	3.73911	3.0418	3.45123	3.0418	3.40188	3.0418	3.0418	3.43815	3.0418	3.0418	3.0418	3.0418	3.0418	3.0418	3.0418	3.0418	3.0418	3.47172	3.0418	3.45704
2410012M07Rik	3.0418	3.0418	3.0418	3.0418	3.0418	3.0418	3.0418	3.0418	3.0418	3.0418	3.0418	3.0418	3.0418	3.0418	3.0418	3.0418	3.0418	3.0418	3.0418	3.0418	3.0418	3.0418	3.0418	3.0418	3.0418	3.0418	3.0418	3.0418	3.0418	3.0418	3.0418	3.0418	3.0418	3.0418	3.0418	3.0418	3.0418	3.0418	3.0418	3.0418	3.0418	3.0418	3.0418	3.0418	3.0418	3.0418	3.47172	3.0418	3.0418
2410015M20Rik	9.78939	9.88568	9.98262	9.80675	7.88077	8.04685	8.02234	8.22312	8.15265	8.21354	7.8165	7.9434	7.99318	8.18693	8.14487	8.14682	7.96033	8.28785	8.14676	7.9966	8.1748	7.93607	7.83861	7.93322	7.96472	7.87214	7.91734	8.30217	9.28197	9.79016	9.04996	9.27918	9.27757	9.14738	9.20804	9.19482	9.00268	9.3354	8.98214	9.73763	9.56228	9.52763	9.5217	9.47377	9.42075	9.43698	9.22309	9.33387	10.2534
2410016O06Rik	10.1781	10.1474	10.2139	10.1825	10.6885	10.5159	10.4046	10.3317	10.029	10.2909	10.1529	10.5209	10.6382	10.3727	10.1864	9.95502	10.6973	10.721	10.4447	10.5468	10.3318	10.4036	10.069	10.1999	10.3832	10.4461	10.3081	10.1051	8.88673	9.44512	8.88128	9.37661	9.39067	9.24504	9.27562	9.20789	9.08143	9.23814	9.14926	9.79768	9.5411	9.86286	9.36949	9.66494	9.64704	9.68127	9.62423	9.70365	9.85684
2410017I17Rik	3.48085	3.0418	3.0418	3.0418	3.84881	3.73856	3.0418	3.0418	3.0418	3.34126	3.98009	3.37666	3.50595	3.45428	3.0418	3.42199	3.55921	3.32866	3.0418	3.0418	3.61373	3.48803	3.73895	3.57317	3.0418	3.60516	3.47394	3.0418	3.0418	3.53725	4.04864	3.74631	3.74308	3.9128	3.57419	3.47886	3.43815	3.54267	3.43477	3.0418	3.57998	3.0418	3.0418	3.76258	3.0418	3.59066	3.47172	3.0418	3.86398
2410018L13Rik	3.0418	3.0418	3.0418	3.0418	3.0418	3.0418	3.0418	3.0418	3.0418	3.34126	3.0418	3.51431	3.0418	3.0418	3.39016	3.31103	3.40864	3.32866	3.46464	3.0418	3.37344	3.35796	3.0418	3.0418	3.40429	3.44142	3.0418	3.41288	3.55793	3.53725	3.63087	3.61891	3.0418	3.0418	3.79057	3.0418	3.43815	3.0418	3.43477	3.72997	3.42345	3.53954	3.45728	3.0418	3.42512	3.0418	3.0418	3.0418	3.45704
2410021H03Rik	3.0418	3.0418	3.0418	3.48967	3.0418	3.0418	3.0418	3.0418	3.0418	3.0418	3.0418	3.0418	3.0418	3.0418	3.0418	3.0418	3.0418	3.0418	3.0418	3.0418	3.0418	3.0418	3.0418	3.0418	3.0418	3.0418	3.0418	3.0418	3.0418	3.0418	3.0418	3.0418	3.0418	3.0418	3.0418	3.0418	3.0418	3.0418	3.0418	3.0418	3.0418	3.0418	3.0418	3.0418	3.0418	3.0418	3.0418	3.0418	3.0418
2410076I21Rik	3.91013	4.16488	4.24762	4.02797	4.66911	4.76534	4.87271	4.97876	4.78954	4.84336	4.73025	4.77407	5.32713	5.29048	5.00975	5.10186	4.6438	4.31664	4.82405	4.58798	4.92659	5.01053	4.47538	4.30956	5.37469	5.15164	5.04558	4.74499	4.27493	4.4757	4.19703	4.986	5.1453	5.26399	5.31166	4.65555	4.83158	4.56231	5.19996	4.82804	4.62894	4.85699	4.6283	4.16478	4.67285	4.69583	4.63138	4.16871	4.11901
2410088K16Rik	3.0418	3.0418	3.0418	3.0418	3.0418	3.0418	3.0418	3.0418	3.0418	3.0418	3.0418	3.0418	3.0418	3.0418	3.0418	3.0418	3.0418	3.0418	3.0418	3.0418	3.0418	3.0418	3.0418	3.0418	3.0418	3.0418	3.0418	3.0418	3.0418	3.0418	3.0418	3.0418	3.0418	3.40188	3.0418	3.0418	3.0418	3.0418	3.0418	3.53069	3.42345	3.0418	3.0418	3.0418	3.0418	3.0418	3.0418	3.0418	3.0418
2410089E03Rik	8.93828	8.88073	8.73922	8.94119	9.89176	9.81638	9.80921	9.8149	9.91464	9.88592	10.1368	10.0948	9.7099	9.85166	10.0951	10.1834	9.90147	9.77342	9.78357	9.80097	9.98746	9.98391	10.0951	10.1541	9.87474	9.88676	10.0785	9.71105	10.0591	9.78536	11.0564	9.716	9.84442	9.96915	10.1205	9.7651	10.2278	9.79713	10.0427	9.64775	9.77673	9.89921	9.776	9.75355	9.85357	9.91557	9.70031	9.76191	8.93148
2410114N07Rik	3.0418	3.0418	3.0418	3.0418	3.0418	3.0418	3.0418	3.0418	3.0418	3.0418	3.0418	3.0418	3.0418	3.0418	3.0418	3.0418	3.0418	3.0418	3.0418	3.0418	3.0418	3.0418	3.0418	3.0418	3.0418	3.0418	3.34794	3.0418	3.0418	3.0418	3.0418	3.0418	3.0418	3.0418	3.0418	3.47886	3.0418	3.0418	3.0418	3.0418	3.0418	3.0418	3.0418	3.0418	3.0418	3.0418	3.0418	3.0418	3.0418
2410124H12Rik	3.0418	3.0418	3.0418	3.0418	3.0418	3.0418	3.0418	3.0418	3.0418	3.0418	3.0418	3.0418	3.0418	3.0418	3.0418	3.0418	3.0418	3.0418	3.0418	3.0418	3.0418	3.0418	3.0418	3.0418	3.0418	3.0418	3.0418	3.0418	3.0418	3.0418	3.0418	3.0418	3.0418	3.0418	3.0418	3.47886	3.0418	3.0418	3.0418	3.0418	3.79861	3.0418	3.62738	3.0418	3.0418	3.0418	3.0418	3.0418	3.0418
2410127L17Rik	6.19355	6.07013	6.29099	6.23984	6.72451	6.69973	6.63033	6.6603	6.65211	6.53377	6.5156	6.71362	6.59376	6.60148	6.5532	6.56757	6.70245	6.96235	6.94845	6.8104	6.42714	6.34965	6.51116	6.54127	6.82789	6.54414	6.5704	6.64616	5.90891	6.3284	5.79761	4.95297	4.91132	5.01912	5.07651	5.69252	5.85371	6.28096	4.91694	5.50886	6.37316	6.75369	5.803	6.82604	5.79705	6.0993	6.59705	6.64904	6.61782
2410131K14Rik	8.60387	8.62253	8.67302	8.60403	8.78483	8.65148	8.58777	8.49687	8.18043	8.21007	8.28585	8.50028	8.57953	8.39309	8.17892	8.15267	8.50447	8.44088	8.71034	8.61752	8.23259	8.25039	8.56983	8.50215	8.65106	8.53818	8.40184	8.32454	7.77895	8.1939	8.71912	8.27011	8.17541	8.16726	8.10836	8.23766	7.86937	8.36229	7.97534	8.36383	8.41065	8.33166	8.23674	8.37097	8.26434	8.20411	8.49905	8.44448	8.29322
2410137M14Rik	3.0418	3.0418	3.0418	3.0418	3.0418	3.0418	3.0418	3.0418	3.34646	3.0418	3.0418	3.0418	3.0418	3.0418	3.0418	3.0418	3.0418	3.0418	3.0418	3.0418	3.0418	3.0418	3.0418	3.0418	3.0418	3.0418	3.0418	3.0418	3.0418	3.0418	3.0418	3.0418	3.74308	3.0418	3.0418	3.0418	3.0418	3.0418	3.0418	3.0418	3.0418	3.7423	3.0418	3.0418	3.0418	3.43106	3.47172	3.51157	3.75618
2410141K09Rik	3.0418	3.0418	3.0418	3.0418	3.0418	3.0418	3.0418	3.0418	3.0418	3.34126	3.0418	3.0418	3.0418	3.0418	3.0418	3.0418	3.0418	3.0418	3.0418	3.0418	3.0418	3.0418	3.0418	3.0418	3.0418	3.0418	3.0418	3.0418	3.0418	3.0418	3.0418	3.0418	3.0418	3.0418	3.0418	3.0418	3.0418	3.0418	3.0418	3.0418	3.0418	3.0418	3.0418	3.0418	3.0418	3.0418	3.0418	3.0418	3.0418
2500004C02Rik	4.88494	4.90443	5.69303	5.275	5.01608	5.19585	5.58078	5.47073	5.28768	5.43945	4.73025	5.11114	5.07935	5.09337	5.18247	5.50671	5.91437	5.42576	5.76582	5.55204	5.60686	5.46999	5.13449	4.96567	5.33631	5.0075	5.28248	5.20224	5.82841	5.40364	5.14726	5.44717	5.5156	5.64914	5.61816	5.34689	6.47388	5.64994	6.42231	6.2054	5.84819	5.69461	5.7474	5.05845	5.42499	5.74989	5.72129	5.30066	6.2746
2510002D24Rik	7.52086	7.56442	7.95828	7.80332	7.90009	8.10963	8.0446	7.96995	8.00507	8.12054	7.80489	7.89013	8.00531	7.75556	8.01891	7.96595	7.87397	7.93191	8.00578	7.73976	8.22628	8.01578	7.83241	8.195	8.05546	7.96329	8.02651	8.1834	7.8934	8.33213	9.24466	8.10134	8.24317	8.0983	8.13773	8.31219	8.1398	8.14428	8.11318	8.35964	8.10197	8.24009	8.06938	8.15942	8.18242	8.09686	8.10615	8.33848	8.46862
2510003E04Rik	9.23737	9.14811	9.24293	9.16484	9.01324	9.02416	9.0585	8.88624	9.22757	9.2245	9.08505	9.21413	9.10624	9.11329	9.22338	9.1801	8.91783	9.02972	9.09014	9.00989	9.19552	9.19218	9.09203	9.39405	9.07268	9.07425	9.21435	9.26927	9.3495	9.40393	8.4121	9.51603	9.51524	9.64882	9.52034	9.44077	9.09799	9.29452	9.13039	9.29108	9.43394	9.41496	9.55374	9.46093	9.3332	9.50564	9.27377	9.52714	9.10713
2510009E07Rik	5.17446	5.05169	5.323	5.17782	5.01608	5.09018	4.1954	4.45898	5.49809	5.63357	4.92982	5.52976	4.58237	4.42228	5.74976	5.75605	5.86117	4.88393	4.93756	4.43689	5.8278	5.56059	5.21702	5.82042	4.62644	4.65696	5.4581	5.5483	5.74294	5.47138	7.15663	5.40058	5.54756	5.98541	6.10422	5.13345	5.31412	5.27741	5.12142	6.31448	6.31067	6.33935	6.56748	5.05845	5.76567	6.30276	4.96551	5.42911	4.94258
2510039O18Rik	10.7212	10.7296	10.6109	10.6371	11.2344	11.0269	10.8356	10.6516	11.1389	11.3422	10.8499	11.2147	11.2144	10.8108	11.3603	11.1183	11.1944	11.1004	11.3806	11.3291	11.8084	11.8741	10.8818	11.2389	10.9896	11.0472	11.5344	11.3106	9.64849	10.5119	10.8091	10.2904	10.1606	10.2899	9.95069	9.91831	9.86719	9.98299	9.4651	10.3764	10.2883	10.3644	10.1162	10.2289	10.2704	10.2939	10.1111	10.3035	10.2926
2510049J12Rik	4.55992	4.3708	4.59137	4.41172	4.22133	4.70674	4.29026	4.51237	3.78132	3.70672	3.71101	4.08052	4.93494	4.7848	3.0418	3.92228	3.99741	3.93604	3.87872	3.96214	3.966	3.92401	4.12893	4.44882	4.98043	4.84477	3.72133	4.00813	4.27493	4.4757	3.86928	4.17442	4.68608	4.39035	4.65032	3.65758	4.20298	4.14066	4.06324	3.53069	3.57998	4.23294	4.04282	5.43408	5.12931	4.24162	4.22854	4.53868	4.4834
2610001J05Rik	9.08641	9.06975	9.41293	9.43712	7.94108	8.27394	7.99973	8.13378	8.32351	8.14436	8.38266	8.41992	7.92072	8.12167	8.13003	8.21828	8.29163	8.47043	8.0569	8.06549	7.76879	7.50521	8.32265	8.1555	8.0974	7.99603	7.88359	8.20902	9.04935	8.84438	9.06129	9.00127	9.10111	9.06642	9.46815	9.65628	9.32603	9.78077	9.6253	9.41532	9.61122	9.31085	9.59538	9.2283	9.10398	9.14579	9.41282	9.41804	9.789
2610002J02Rik	9.26106	9.23685	9.08298	9.28444	8.57264	8.71171	8.53768	8.6151	8.50436	8.63025	8.51667	8.96153	8.90484	8.75419	8.74427	8.7294	8.60909	8.57798	8.85281	8.64528	8.77512	8.52857	8.60296	9.19146	8.92998	8.89117	8.67456	8.93483	8.69602	9.37438	8.84679	9.19948	8.95296	9.27777	9.07477	8.97876	9.25543	8.9324	8.48669	9.1862	9.18224	9.23465	9.43404	9.05694	9.22737	9.23515	9.32107	9.39933	9.26851
2610002M06Rik	8.60102	8.64162	8.76545	8.87634	9.1485	9.14014	9.1727	9.27668	8.81311	8.88519	9.19128	9.01223	9.05934	9.1378	8.89667	8.95776	9.47412	9.43917	9.20434	9.19539	8.91105	8.84501	9.38009	9.02462	9.18707	9.10956	8.78585	8.91203	9.4562	8.86578	9.64163	9.24941	9.37135	9.32842	9.50014	9.26259	9.18119	9.43491	9.63202	9.22125	9.29305	9.39388	9.4369	9.2054	9.13583	9.37542	9.13696	9.04718	9.59631
2610005L07Rik	5.17446	5.11937	4.94556	5.03578	5.53015	5.41933	5.26408	5.0473	5.15275	5.55698	5.17977	5.31177	5.20911	5.26408	5.29842	5.33589	5.45383	5.34362	5.25578	5.20219	5.42161	5.57305	5.33182	5.41135	5.21398	5.39939	5.41957	5.04633	5.77203	5.68487	6.34099	6.5526	6.41158	6.28531	5.77965	5.85672	5.4492	5.67923	5.59285	4.87987	5.39586	5.41271	5.01115	5.60452	5.40444	5.04968	5.42236	5.45938	5.27662
2610008E11Rik	7.74968	7.82067	8.13866	8.06299	7.5829	7.87375	7.68239	7.66764	7.89531	7.83768	8.02092	7.74162	7.62285	7.62769	7.96416	7.81732	7.29793	7.68829	7.28906	7.27327	8.00092	7.8114	7.70245	7.88571	7.49764	7.61529	7.51154	7.86833	8.65465	7.52214	10.0486	7.94969	8.18035	8.07639	8.47798	8.1552	7.78176	8.29476	8.43121	7.86365	7.82021	8.22105	8.25635	8.26169	8.4277	8.16216	7.77318	7.6894	7.53207
2610015P09Rik	7.63144	7.6904	7.49728	7.47975	7.69043	7.81843	7.52099	7.61045	7.30671	7.33391	8.07021	7.77434	7.42008	7.52506	7.4215	7.29434	7.7573	7.6791	7.45682	7.31166	7.52653	7.44718	7.55956	8.04864	7.59072	7.47768	7.23609	7.15527	8.26245	7.75649	6.31573	8.30406	8.31689	8.39663	8.4595	7.94813	7.25741	7.9354	7.94683	8.11808	8.05868	8.34491	7.95796	8.38915	8.32615	8.00829	7.88094	8.03331	8.03793
2610016A17Rik	3.0418	3.0418	3.0418	3.0418	3.0418	3.0418	3.0418	3.0418	3.0418	3.0418	3.0418	3.0418	3.0418	3.0418	3.0418	3.0418	3.0418	3.0418	3.0418	3.0418	3.0418	3.0418	3.0418	3.0418	3.0418	3.0418	3.0418	3.0418	3.0418	3.0418	3.0418	3.0418	3.0418	3.40188	3.0418	3.0418	3.0418	3.0418	3.0418	3.53069	3.0418	3.0418	3.0418	3.0418	3.0418	3.0418	3.0418	3.0418	3.0418
2610018G03Rik	11.2594	11.3685	11.7969	11.7234	10.4099	10.3385	10.8163	10.6928	10.2874	10.2652	10.6195	10.5691	11.1623	11.4878	10.2374	10.3988	11.0507	11.0302	10.9172	11.0246	10.3449	10.3418	10.8206	10.4725	11.421	11.3071	10.2703	10.1194	10.2604	9.77409	11.3195	9.40815	10.0284	10.1529	10.4781	10.3457	10.4284	10.3683	10.7676	10.1754	10.4369	10.1969	10.3704	10.2809	10.0848	10.2581	10.1824	10.0704	10.3076
2610020C07Rik	5.82732	5.78055	5.943	5.69951	5.875	6.11583	6.26037	6.12946	6.09139	5.89446	6.15871	6.07913	6.15798	6.44056	6.02513	6.15026	6.14256	5.85204	5.60172	5.95013	5.88337	6.20006	5.9644	5.98685	6.16937	5.93416	5.97811	5.87263	6.31353	6.11765	6.63395	6.12062	6.4779	6.38762	6.62326	6.0208	6.77703	5.91806	6.86682	6.33187	5.93438	5.95197	5.7474	5.99264	6.01218	6.29158	6.35661	6.05621	5.97243
2610020H08Rik	7.13443	7.11819	7.11651	7.16996	7.91283	7.93283	8.01672	8.05808	7.84525	7.83768	7.83944	7.97955	8.07142	8.2717	7.98631	8.02774	8.22861	8.08395	8.09878	8.12766	8.76645	8.70372	8.09829	8.26295	8.34025	8.1299	7.91288	7.70724	8.14782	7.75649	9.39246	7.8612	8.26661	8.25761	8.33826	7.86563	7.86937	7.86881	8.37351	8.35544	8.09586	8.20661	8.24984	7.74468	7.9732	8.38691	7.67242	7.95857	7.93629
2610027K06Rik	3.0418	3.0418	3.0418	3.48967	3.40646	3.64666	3.54436	3.46602	3.83915	3.34126	3.0418	3.0418	3.60906	3.0418	3.64229	3.88245	3.40864	3.53704	3.0418	3.45895	3.966	4.2714	3.0418	3.57317	3.0418	3.0418	3.72133	3.62615	3.0418	3.73911	4.63702	3.85269	4.13521	3.66229	3.0418	3.79319	3.72407	3.0418	3.59585	3.0418	3.88559	3.0418	3.0418	3.55409	3.0418	3.0418	3.0418	4.16871	3.0418
2610028E06Rik	3.0418	3.0418	3.0418	3.0418	3.0418	3.0418	3.0418	3.0418	3.0418	3.0418	3.0418	3.0418	3.0418	3.0418	3.0418	3.0418	3.0418	3.0418	3.0418	3.0418	3.0418	3.0418	3.0418	3.0418	3.0418	3.0418	3.34794	3.0418	3.0418	3.0418	3.0418	3.0418	3.0418	3.0418	3.0418	3.0418	3.0418	3.0418	3.0418	3.53069	3.0418	3.89567	3.0418	3.0418	3.0418	3.0418	3.47172	3.0418	3.0418
2610028H24Rik	3.0418	3.0418	3.0418	3.67269	3.40646	3.39271	3.39806	3.0418	3.0418	3.46455	3.0418	3.0418	3.0418	3.45428	3.0418	3.31103	3.0418	3.0418	3.63768	3.0418	3.37344	3.0418	3.0418	3.0418	3.55311	3.44142	3.47394	3.0418	3.0418	3.0418	3.0418	3.0418	3.5401	3.0418	3.0418	3.0418	3.60058	3.0418	3.0418	4.21267	3.69906	3.53954	3.0418	3.0418	3.0418	3.81346	3.89244	3.0418	3.0418
2610034B18Rik	3.48085	3.78741	3.69955	3.48967	3.99191	4.31619	4.29026	4.56332	4.11722	3.9278	3.98009	4.17503	4.11044	3.45428	4.26399	4.29505	3.99741	4.05673	4.2768	4.19485	4.20815	3.86859	4.22742	4.02253	4.21464	4.07992	4.26906	4.40719	4.27493	4.12918	3.86928	4.02871	4.02426	4.4711	4.49409	4.00486	4.3184	4.14066	4.50495	4.21267	3.69906	4.80216	3.0418	3.92015	3.96754	4.29681	3.78108	3.84851	3.0418
2610034M16Rik	3.48085	3.0418	3.5089	3.0418	3.0418	3.0418	3.0418	3.0418	3.0418	3.34126	3.0418	3.0418	3.0418	3.45428	3.39016	3.0418	3.0418	3.32866	3.0418	3.0418	3.0418	3.0418	3.0418	3.0418	3.0418	3.44142	3.0418	3.56516	3.0418	3.0418	3.0418	3.0418	3.0418	3.0418	3.0418	3.0418	3.0418	3.0418	3.0418	3.0418	3.42345	3.0418	3.45728	3.0418	3.0418	3.0418	3.47172	3.0418	3.45704
2610035D17Rik	5.96037	6.03706	6.22455	6.11042	6.68027	6.57099	6.88082	6.7009	6.66271	6.65683	6.86925	6.65704	6.8586	6.77325	6.96541	6.80269	7.17467	6.96992	6.58912	6.07603	7.95078	7.30189	7.19368	7.00406	6.88029	6.68548	6.77179	6.60587	6.40796	6.09683	7.4723	5.22332	4.74646	5.1362	5.68505	6.27206	4.89887	6.03489	6.83594	7.21653	7.12361	6.643	7.34463	7.32016	7.59916	7.16864	6.78337	6.95738	6.99898
2610035F20Rik	3.0418	3.0418	3.5089	3.0418	3.0418	3.39271	3.39806	3.0418	3.0418	3.0418	3.0418	3.37666	3.0418	3.0418	3.0418	3.0418	3.0418	3.0418	3.46464	3.0418	3.0418	3.35796	3.0418	3.57317	3.40429	3.0418	3.0418	3.0418	3.0418	3.0418	3.0418	3.0418	3.0418	3.0418	3.0418	3.0418	3.43815	3.0418	3.0418	3.0418	3.0418	3.53954	3.0418	3.0418	3.0418	3.0418	3.0418	3.0418	3.0418
2610037D02Rik	3.48085	3.65281	3.0418	3.48967	4.05501	3.73856	3.54436	3.77143	3.83915	3.82584	3.98009	3.85314	3.77107	3.7515	3.9506	3.88245	3.85353	3.61273	3.87872	3.45895	3.77702	3.74323	3.89162	4.14808	3.66641	3.83361	3.94701	3.77799	3.92661	3.53725	3.86928	4.6071	4.74646	4.8901	4.78799	4.60569	3.72407	4.75445	3.99018	4.1153	4.03476	3.89567	4.19043	4.05106	4.10497	4.18314	4.41994	4.25419	4.04227
2610044O15Rik8	6.72458	6.91723	7.12556	7.05272	5.95239	6.39594	6.31688	6.4378	6.26255	6.20146	6.15871	6.18149	6.27611	6.23291	6.33566	6.31229	5.9656	6.08885	5.85926	5.7369	6.15922	6.05907	6.05369	6.11181	6.38545	6.18523	6.00387	6.1911	7.33028	6.31049	7.29134	6.21562	6.55666	6.42306	6.72018	6.67051	6.58227	7.04724	7.33765	6.43193	6.64997	6.61393	6.80925	6.72892	6.65236	6.50008	7.05634	6.74755	6.87724
2610100L16Rik	3.0418	3.0418	3.0418	3.0418	3.0418	3.0418	3.0418	3.0418	3.0418	3.0418	3.0418	3.0418	3.0418	3.0418	3.0418	3.0418	3.0418	3.0418	3.0418	3.0418	3.0418	3.0418	3.0418	3.0418	3.0418	3.0418	3.0418	3.0418	3.0418	3.0418	3.0418	3.0418	3.0418	3.0418	3.0418	3.0418	3.0418	3.0418	3.0418	3.0418	3.42345	3.0418	3.0418	3.0418	3.0418	3.0418	3.0418	3.0418	3.0418
2610203C20Rik	3.0418	3.0418	3.0418	3.0418	3.0418	3.0418	3.74903	3.0418	3.0418	3.0418	3.0418	3.0418	3.0418	3.0418	3.0418	3.0418	3.0418	3.44682	3.46464	3.45895	3.0418	3.48803	3.0418	3.0418	3.0418	3.44142	3.47394	3.56516	3.0418	3.0418	3.0418	3.0418	3.0418	3.54972	3.0418	3.47886	3.0418	3.0418	3.0418	3.72997	4.16174	3.0418	3.62738	3.0418	3.0418	3.0418	3.0418	3.0418	3.0418
2610203C22Rik	3.48085	3.0418	3.0418	3.48967	3.0418	3.64666	3.65579	3.0418	3.0418	3.0418	3.0418	3.37666	3.50595	3.0418	3.0418	3.0418	3.0418	3.44682	3.63768	3.45895	3.0418	3.35796	3.0418	3.0418	3.40429	3.0418	3.0418	3.30456	3.0418	3.0418	3.0418	3.0418	3.0418	3.40188	3.0418	3.0418	3.60058	3.0418	3.59585	3.0418	3.0418	3.0418	3.0418	3.0418	3.0418	3.0418	3.0418	3.84851	3.0418
2610206C17Rik	5.70212	5.96847	5.71772	5.39434	5.01608	4.51086	4.56706	4.14142	5.15275	4.97283	4.83411	5.05056	4.72054	4.82314	5.1621	5.26996	5.00078	5.01522	5.33782	5.25818	4.92659	5.08439	4.54671	4.78495	4.78669	4.61553	4.95579	4.72861	5.8826	6.15839	6.31573	5.84182	5.48286	6.41428	5.65201	5.60243	4.83158	5.42509	5.12142	5.81561	5.83329	6.14881	5.60817	6.46114	5.95798	5.51569	5.31525	5.75417	6.35022
2610207O16Rik	3.0418	3.47545	3.0418	3.0418	3.0418	3.0418	3.0418	3.0418	3.0418	3.0418	3.0418	3.0418	3.0418	3.0418	3.0418	3.0418	3.0418	3.0418	3.0418	3.0418	3.0418	3.0418	3.0418	3.0418	3.0418	3.0418	3.34794	3.0418	3.0418	3.0418	3.0418	3.0418	3.0418	3.0418	3.0418	3.0418	3.0418	3.0418	3.0418	3.0418	3.0418	3.0418	3.0418	3.0418	3.0418	3.0418	3.0418	3.0418	3.0418
2610301B20Rik	8.0595	8.20881	8.1826	8.22233	7.73057	7.87375	7.70704	7.58907	7.60653	7.86662	7.85077	7.75659	7.38331	7.52506	7.59387	7.74943	7.80994	7.94154	7.59108	7.37948	7.67611	7.61175	7.91687	7.79676	7.49346	7.44111	7.64116	7.82536	8.55188	7.99174	6.26382	8.21278	8.74175	8.16985	8.24958	8.26293	8.51042	8.31763	8.54724	7.70743	7.52514	7.87023	7.7705	8.10543	7.93229	7.47851	8.19957	7.94314	8.34903
2610305D13Rik	3.0418	3.0418	3.0418	3.0418	3.40646	3.0418	3.0418	3.46602	3.0418	3.55864	3.71101	3.51431	3.50595	3.0418	3.0418	3.0418	3.0418	3.32866	3.46464	3.45895	3.37344	3.0418	3.0418	3.0418	3.0418	3.44142	3.0418	3.73136	4.05841	3.0418	3.0418	3.0418	3.0418	3.0418	3.57419	3.0418	3.60058	3.0418	3.43477	3.0418	3.0418	3.0418	3.0418	3.0418	3.0418	3.0418	3.0418	3.0418	3.0418
2610306M01Rik	6.29706	6.30993	6.76851	6.49378	5.4956	5.45318	5.43176	5.47073	5.18397	5.49949	5.10176	5.45591	5.359	5.1528	5.40501	5.31427	5.27842	5.4815	5.38982	5.55204	5.3907	5.0294	5.53539	5.56179	5.29678	5.50787	5.25327	5.30019	5.9601	6.0103	5.08591	6.0633	5.95445	6.175	5.95137	5.81747	5.75469	5.52606	6.04116	5.93525	6.11688	6.35706	6.32682	6.54527	6.08971	6.04682	6.00077	6.07548	6.30026
2610307P16Rik	3.48085	3.0418	3.69955	3.67269	3.0418	3.0418	3.39806	3.63962	3.71809	3.46455	3.0418	3.37666	3.0418	3.0418	3.73356	3.57794	3.7697	3.93604	3.46464	3.86768	4.70661	4.75852	3.53713	3.0418	3.0418	3.44142	3.47394	3.30456	3.55793	3.53725	5.02149	3.0418	3.0418	3.54972	3.0418	3.0418	3.43815	3.54267	3.59585	3.53069	4.10049	3.89567	3.75658	3.76258	3.42512	3.43106	3.78108	3.70328	4.71434
2610316D01Rik	3.0418	3.0418	3.0418	3.0418	3.0418	3.0418	3.0418	3.0418	3.0418	3.0418	3.0418	3.0418	3.0418	3.0418	3.39016	3.0418	3.0418	3.0418	3.0418	3.0418	3.0418	3.0418	3.0418	3.0418	3.0418	3.0418	3.0418	3.0418	3.0418	3.53725	3.0418	3.0418	3.0418	3.0418	3.0418	3.0418	3.0418	3.0418	3.0418	3.0418	3.0418	3.0418	3.0418	3.0418	3.0418	3.0418	3.0418	3.0418	3.0418
2610318N02Rik	6.8165	6.71473	6.50162	6.53201	7.7766	7.79314	7.66093	7.76137	7.41376	7.35294	7.24142	7.74763	7.74371	7.79578	7.65049	7.52636	7.8871	8.02541	8.25511	8.21111	7.60975	7.6176	7.56705	7.98888	7.77785	7.82836	7.7325	7.72979	7.311	7.69627	4.19703	7.81484	7.59789	7.9526	7.59292	7.66339	7.47132	7.9413	7.2173	7.91598	7.72447	7.94176	7.90092	7.66474	7.56385	7.81679	7.77803	7.96876	8.08253
2610507B11Rik	12.3913	12.4215	12.2314	12.3443	13.1093	12.9634	13.1204	13.1822	13.425	13.4292	12.985	13.0519	13.1793	13.1506	13.4161	13.4367	13.1844	13.0196	13.1619	13.1218	13.4979	13.569	13.0359	13.135	13.1265	13.126	13.5206	13.3396	13.2485	13.2079	12.4303	12.757	12.7875	12.7576	12.6479	12.7607	13.1099	12.6699	12.7566	12.6037	12.6609	12.7252	12.6298	12.43	12.6026	12.7156	12.6825	12.7061	12.2618
2610507I01Rik	7.158	6.99593	7.03231	6.82624	7.43166	7.41195	7.38352	7.48296	7.26571	7.25179	7.52251	7.08113	7.15361	7.1154	7.44171	7.31278	7.29793	7.46331	7.19369	7.01071	7.28854	6.96719	7.58192	7.38282	7.227	7.05488	6.99125	7.09563	7.33028	6.98603	7.76831	4.95297	5.3796	4.99435	5.31166	6.67051	6.24065	5.7079	6.73908	7.58342	7.55218	7.72231	7.65692	7.49016	7.65054	7.49311	7.40348	7.47714	7.60018
2610524H06Rik	6.88411	6.85287	7.00311	6.80565	5.96488	6.05243	5.81111	5.98763	5.74249	5.77499	6.57183	6.05969	5.6797	5.82316	5.5505	5.83249	6.52801	6.56188	6.36848	6.32376	6.0476	5.92166	6.23593	6.33261	5.86196	6.00854	5.49555	5.87263	6.92334	6.36355	6.94385	6.77255	6.7022	7.30237	7.05298	7.28697	6.7179	7.07981	7.29299	7.16931	6.89578	7.04203	7.06882	6.83939	6.78144	7.05502	6.69326	6.98787	7.56391
2610528A11Rik	3.0418	3.65281	3.0418	3.0418	3.0418	3.53686	3.39806	3.46602	3.56755	3.46455	3.98009	3.51431	3.37071	3.45428	3.39016	3.42199	3.0418	3.32866	3.46464	3.0418	3.37344	3.35796	3.73895	3.41859	3.0418	3.0418	3.57008	3.41288	3.0418	3.73911	3.0418	3.74631	4.13521	3.66229	3.79057	3.65758	3.43815	3.74667	3.59585	3.0418	3.69906	3.7423	3.75658	4.05106	4.10497	3.0418	3.98954	3.70328	3.75618
2610528J11Rik	3.48085	3.0418	3.0418	3.0418	3.0418	3.0418	3.0418	3.0418	3.0418	3.0418	3.0418	3.0418	3.0418	3.0418	3.0418	3.0418	3.0418	3.0418	3.0418	3.0418	3.0418	3.0418	3.0418	3.0418	3.0418	3.0418	3.0418	3.0418	3.0418	3.0418	3.0418	3.0418	3.0418	3.0418	3.0418	3.0418	3.0418	3.0418	3.0418	3.72997	3.0418	3.0418	3.0418	3.0418	3.0418	3.0418	3.0418	3.0418	3.0418
2700029M09Rik	9.93016	9.93292	9.94742	10.013	9.47775	9.63902	9.57244	9.8022	9.64921	9.61032	9.76429	9.50442	9.51004	9.92993	9.56963	9.62741	9.7723	9.60752	9.34536	9.56912	9.23164	9.19609	9.77179	9.55224	9.75156	9.62617	9.36204	9.52991	10.6644	9.83268	9.02318	9.90872	10.3325	9.92621	10.3709	9.98597	10.3607	10.0029	10.392	10.3009	10.0738	10.2222	10.3186	10.2047	10.3688	10.2445	9.90818	9.892	10.3099
2700038G22Rik	6.28273	6.11832	6.52931	6.41409	8.06606	8.08119	8.30408	8.18449	7.92409	7.85111	7.7085	7.73861	7.99804	8.16664	7.92742	7.98575	7.92577	7.9046	8.06461	8.10966	7.37487	7.54571	7.79464	7.89602	8.36564	8.10009	7.83967	7.98067	7.96904	7.76303	7.18461	7.85288	8.57527	7.79719	8.04775	7.98766	8.67848	8.15955	8.49409	7.93864	7.95791	7.72231	7.87577	7.87953	8.05486	7.76164	8.39864	8.37341	8.15392
2700046A07Rik	3.0418	3.0418	3.0418	3.0418	3.0418	3.0418	3.0418	3.0418	3.0418	3.0418	3.0418	3.0418	3.0418	3.0418	3.0418	3.0418	3.0418	3.0418	3.0418	3.0418	3.37344	3.0418	3.0418	3.0418	3.0418	3.0418	3.0418	3.0418	3.0418	3.0418	3.0418	3.0418	3.0418	3.0418	3.0418	3.0418	3.0418	3.0418	3.0418	3.0418	3.0418	3.0418	3.0418	3.0418	3.0418	3.0418	3.0418	3.0418	3.0418
2700046G09Rik	4.92498	4.59446	4.98871	4.53231	4.66911	4.64508	4.457	4.65883	4.44912	4.27655	4.92982	4.6373	4.89044	4.66183	3.81341	4.24239	4.49602	4.67687	4.69885	4.261	4.5941	4.34143	4.54671	4.40441	4.44018	4.48133	4.12223	4.26655	4.53141	4.31715	5.20582	4.02871	4.23421	4.39035	3.79057	4.70336	3.99809	4.14066	4.06324	4.59494	4.59029	4.90946	5.01115	5.05845	4.59655	5.04968	4.80993	5.04038	5.49808
2700049A03Rik	9.07206	8.98902	8.97225	8.99875	9.77641	9.76046	9.86884	9.92437	10.1188	10.1483	9.5203	9.53681	9.49034	9.57096	9.94853	9.92417	9.4356	9.58376	9.26743	9.34287	10.1015	10.0594	9.75388	9.78624	9.70353	9.76023	10.0145	9.95314	9.81302	9.42055	8.98007	9.20602	9.43891	9.3491	9.38737	9.2355	9.34419	9.32642	9.55511	9.39296	9.46267	9.38963	9.55374	9.02242	9.33451	9.4269	9.19977	9.02539	8.89655
2700054A10Rik	3.0418	3.0418	3.0418	3.0418	3.0418	3.0418	3.0418	3.0418	3.0418	3.0418	3.0418	3.0418	3.0418	3.0418	3.0418	3.50677	3.0418	3.0418	3.0418	3.0418	3.0418	3.0418	3.0418	3.0418	3.66641	3.0418	3.34794	3.0418	3.0418	3.0418	3.0418	3.0418	3.0418	3.0418	3.0418	3.47886	3.0418	3.0418	3.0418	3.0418	3.69906	3.7423	3.62738	3.0418	3.0418	3.0418	3.64758	3.51157	3.0418
2700060E02Rik	9.98043	10.0467	10.13	9.98703	9.27955	9.45096	9.44136	9.4627	9.51099	9.5103	9.44761	9.20979	9.18828	9.45312	9.51454	9.42012	9.43225	9.39854	9.39201	9.17822	9.24936	8.91434	9.34572	9.21085	9.30979	9.37852	9.30375	9.52991	10.6024	10.0485	9.63659	9.76443	9.81134	9.67454	9.61938	10.139	10.1553	10.3781	9.98611	9.78992	9.86905	9.83967	9.78277	10.0562	9.90464	9.87722	9.73191	9.70365	10.2767
2700062C07Rik	7.29886	7.28051	7.52488	7.36513	6.98281	7.12275	7.20203	7.2507	6.75478	6.81666	7.0771	7.09536	7.02091	7.13647	6.9821	6.89669	6.89743	7.03271	7.1508	7.07915	6.58779	6.62601	7.27836	7.11446	7.14387	7.05488	6.70604	7.02733	7.77193	7.63342	6.84198	7.99575	7.97928	7.9526	7.65117	7.9746	8.03351	8.30852	7.98938	7.57621	7.68431	7.57252	7.75679	7.61919	7.42316	7.29072	8.13671	8.01867	7.93224
2700069I18Rik	3.0418	3.0418	3.0418	3.0418	3.0418	3.0418	3.0418	3.0418	3.0418	3.0418	3.0418	3.0418	3.0418	3.0418	3.0418	3.0418	3.0418	3.0418	3.0418	3.0418	3.0418	3.0418	3.0418	3.0418	3.0418	3.0418	3.0418	3.0418	3.0418	3.0418	3.0418	3.0418	3.0418	3.0418	3.0418	3.0418	3.0418	3.0418	3.0418	3.0418	3.0418	3.0418	3.0418	3.0418	3.0418	3.0418	3.0418	3.0418	3.0418
2700070H01Rik	3.0418	3.0418	3.0418	3.0418	3.0418	3.0418	3.0418	3.0418	3.0418	3.0418	3.0418	3.0418	3.0418	3.0418	3.0418	3.0418	3.0418	3.0418	3.0418	3.0418	3.0418	3.0418	3.0418	3.0418	3.0418	3.0418	3.0418	3.0418	3.0418	3.0418	3.0418	3.0418	3.0418	3.40188	3.0418	3.0418	3.82725	3.0418	3.0418	3.0418	3.0418	3.53954	3.0418	3.0418	3.0418	3.43106	3.0418	3.0418	3.0418
2700081O15Rik	8.23551	8.21974	7.47622	7.5738	8.67144	8.77276	8.25484	8.10773	8.17676	8.55436	8.20872	8.70681	9.02045	8.36071	8.54987	8.34628	8.14644	8.30435	9.27906	9.42084	8.40631	8.70372	7.81993	8.57024	8.12199	8.50572	8.80519	8.53957	8.19057	8.93392	6.36581	8.60566	8.51391	8.31951	8.10241	7.56219	7.51152	7.63375	6.97702	7.51716	7.14748	8.17728	7.30114	8.56742	8.50642	7.9496	7.99795	7.86889	7.9524
2700086A05Rik	3.0418	3.0418	3.0418	3.0418	3.0418	3.0418	3.0418	3.0418	3.0418	3.0418	3.0418	3.0418	3.0418	3.0418	3.0418	3.0418	3.0418	3.0418	3.0418	3.0418	3.0418	3.0418	3.0418	3.0418	3.0418	3.0418	3.0418	3.0418	3.0418	3.0418	4.32541	3.0418	3.0418	3.0418	3.0418	3.0418	3.0418	3.0418	3.0418	3.0418	3.0418	3.0418	3.45728	3.0418	3.0418	3.0418	3.0418	3.0418	3.45704
2700089E24Rik	9.56034	9.51631	9.88368	9.92664	8.6488	8.85136	8.5494	8.66186	8.77111	8.76157	8.96516	8.70988	8.54838	8.71515	8.58656	8.72057	8.65005	8.47176	7.87161	8.14545	8.21571	8.28939	8.87116	8.5333	8.38833	8.61509	8.59066	8.65588	9.91206	9.50283	9.66903	9.17968	9.23068	9.28017	9.57715	9.57072	9.79284	9.57426	9.8762	9.28888	9.26614	9.51987	9.2653	9.93153	9.77582	9.55969	9.53821	9.46555	9.40636
2700089I24Rik	3.0418	3.0418	3.0418	3.0418	3.0418	3.0418	3.0418	3.0418	3.0418	3.0418	3.0418	3.0418	3.0418	3.0418	3.0418	3.0418	3.0418	3.0418	3.0418	3.0418	3.0418	3.0418	3.0418	3.0418	3.0418	3.0418	3.0418	3.0418	3.0418	3.0418	3.0418	3.0418	3.0418	3.40188	3.0418	3.0418	3.60058	3.0418	3.0418	3.0418	3.0418	3.0418	3.0418	3.0418	3.0418	3.0418	3.0418	3.0418	3.45704
2700094K13Rik	11.0048	11.0493	11.1996	11.1642	9.27832	9.23699	9.09092	9.26999	9.41063	9.43139	8.81141	9.12018	9.04767	9.1256	9.47791	9.34744	9.0893	9.34011	9.16906	9.16782	9.10335	8.97595	8.99278	9.21497	9.25283	9.131	9.25535	9.63704	10.6757	11.1082	8.06713	10.846	10.8764	10.408	10.6043	10.716	10.2781	10.8106	10.4735	11.0844	10.9047	10.9003	10.6341	10.7731	10.6926	10.8655	10.572	10.7753	11.3967
2700097O09Rik	7.75997	7.7769	7.98831	8.01913	7.48387	7.69414	7.8561	7.66253	7.11223	7.07576	7.44979	7.60606	7.69358	7.8133	7.14893	7.13764	7.30774	7.03992	7.40305	7.15858	6.36671	6.47195	7.41757	7.73297	7.64456	7.73226	6.95258	7.1441	8.15863	7.32396	7.56023	7.8777	8.0886	8.07639	8.19474	7.7271	7.89617	7.88727	7.8654	7.88714	7.53421	8.00435	7.84153	7.50693	7.40332	8.07441	7.7683	8.01376	7.82692
2700099C18Rik	6.95765	6.93509	6.80286	6.40037	7.07092	7.09709	7.12561	7.17371	7.27607	7.20715	7.22407	7.00779	6.94206	7.23092	7.16848	7.20972	7.31748	6.9812	6.77063	6.93884	7.44184	7.42062	7.05114	7.31773	7.03844	6.99837	6.95693	7.04846	9.0141	7.77602	8.28256	8.09783	8.35239	8.34262	8.39287	8.13578	7.91501	7.88727	8.60079	7.9554	7.47421	7.85177	7.72426	7.97298	7.89019	7.88841	7.72368	7.6392	8.00742
2810001G20Rik	6.45857	6.42881	6.54296	6.76354	5.2463	5.40208	5.48328	5.54135	5.76268	5.85879	5.51259	5.37776	5.3109	5.43874	5.73645	5.73226	5.31945	5.54547	5.33782	5.7369	6.21188	6.31371	5.4709	5.57946	5.412	5.46552	5.29684	5.79479	5.93474	5.56701	9.43661	5.82457	6.13082	6.06661	6.32693	5.85672	6.12753	5.58941	6.09485	6.5699	6.00233	6.35706	6.54624	6.04018	6.46297	6.57558	5.61395	5.86973	5.95627
2810002D19Rik	6.86512	6.6833	7.21312	7.27087	5.96488	6.10546	5.9969	5.90213	6.06744	6.20851	6.04334	6.1543	5.90808	6.15166	6.13978	6.21958	5.94022	6.04605	6.01306	6.0609	6.16814	5.68035	6.17777	6.03818	5.98833	6.41997	6.02917	6.01009	6.54708	6.3808	5.76019	5.90878	5.90665	6.14335	6.15167	6.6264	6.61972	6.67286	6.86682	6.64113	6.6994	6.4913	6.94491	6.46114	6.71028	6.38922	6.85896	6.86182	6.81668
2810004N23Rik	10.3995	10.4768	10.7516	10.7324	9.99334	10.089	9.84052	9.76819	9.48004	9.51943	10.1688	9.88642	9.8408	9.85271	9.50882	9.42797	9.95302	10.1333	9.834	9.9214	9.22533	9.26849	9.96814	9.80276	9.84717	9.88773	9.51374	9.56425	10.1525	9.86339	8.39429	10.0725	10.2725	9.99635	10.2778	10.4569	10.3939	10.5919	10.4654	10.4051	10.3594	10.326	10.2824	10.5079	10.1759	9.99788	10.4298	10.3255	10.7603
2810006K23Rik	6.59201	6.47861	6.93256	7.04396	7.17527	7.34384	7.04489	7.08473	7.18003	7.09475	7.37318	7.13721	6.92678	6.85196	7.20207	7.05549	7.46936	7.53126	7.18663	7.07915	7.31261	7.21949	7.16431	7.15519	6.92462	6.99837	6.98274	7.17461	7.11364	6.88141	5.14726	7.38343	7.50619	7.31648	7.1602	7.11476	7.03383	7.02511	7.42303	7.34103	7.39177	7.46323	7.54429	7.36688	7.42808	7.69171	7.41601	7.33447	7.77803
2810007J24Rik	3.0418	3.0418	3.0418	3.0418	3.0418	3.0418	3.0418	3.0418	3.0418	3.0418	3.0418	3.0418	3.0418	3.0418	3.0418	3.0418	3.0418	3.0418	3.0418	3.0418	3.0418	3.0418	3.0418	3.0418	3.0418	3.0418	3.34794	3.41288	3.0418	3.0418	3.0418	3.0418	3.0418	3.0418	3.0418	3.0418	3.0418	3.0418	3.0418	3.0418	3.0418	3.0418	3.0418	3.0418	3.0418	3.0418	3.0418	3.0418	3.0418
2810008D09Rik	7.27033	7.35527	7.53849	7.46673	6.63461	6.82408	6.32608	6.60785	6.54719	6.51691	6.8467	6.5013	6.76424	6.84342	6.73525	6.54535	6.64923	6.48441	6.52308	6.47899	6.70804	6.68325	6.49544	6.74625	6.7384	6.58322	6.32218	6.60587	6.49649	7.10431	7.74036	7.13804	6.80878	7.08324	6.75108	7.32182	6.82583	7.24198	6.7474	7.79077	7.43115	7.43041	7.34463	7.25208	7.6838	7.84359	7.63005	7.58718	7.44356
2810013P06Rik	5.26818	5.43946	5.5624	5.47732	4.99061	4.9989	4.95113	5.11234	5.4485	5.47579	5.38926	4.72124	4.99886	4.99871	5.48777	5.3987	5.14704	5.21668	4.93756	4.98464	5.91567	5.77986	4.95161	5.07309	5.25603	5.15164	5.43254	5.24668	6.79011	6.54267	9.14173	6.25445	6.17165	6.70037	6.30618	6.31455	6.44283	6.29965	6.80438	5.65686	5.60578	5.77697	5.60817	5.50485	5.44522	5.64676	6.40808	6.47283	6.31292
2810021J22Rik	7.78031	7.67987	7.80923	7.80848	7.57891	7.81215	7.91468	7.73242	7.62284	7.62219	7.68336	7.68642	7.73499	7.72811	7.80187	7.78566	7.46936	7.55154	7.71875	7.5335	7.80876	7.59106	7.78183	7.79308	7.80173	7.74088	7.6599	7.78287	8.0409	7.74333	7.95817	8.37836	8.35239	8.41855	8.55835	8.26651	8.04724	8.40988	8.22123	7.85175	7.97464	7.92421	8.1933	7.979	7.82462	7.88473	8.07887	8.00883	7.86998
2810025M15Rik	6.08181	6.21001	5.61616	5.58058	4.60009	4.39837	4.09008	4.65883	3.89271	3.9278	4.49006	4.48213	4.24037	4.52433	3.88511	4.21496	4.32526	4.54645	4.50792	3.96214	3.77702	3.80871	4.73725	5.12359	4.3109	4.61553	3.78484	4.3624	5.16537	5.21747	3.0418	5.55705	5.30603	5.83415	5.65201	5.37475	4.72311	5.3533	4.81792	5.68463	5.37505	5.75006	5.85646	5.63618	5.64983	5.62879	5.47287	6.13172	5.85521
2810029C07Rik	4.55992	5.18368	4.85449	5.21102	4.22133	4.47464	4.53157	4.21354	4.60749	4.53332	4.49006	4.51493	4.11044	4.42228	4.06766	4.29505	4.3706	4.22722	3.76908	4.261	4.46925	4.23447	4.39908	4.49148	4.35579	4.48133	4.42662	4.38504	4.7396	4.12918	4.43946	4.23952	4.8588	4.86262	5.07651	5.03003	5.1368	4.8672	4.54904	5.02352	5.0695	4.95981	4.90832	4.78972	4.70921	5.27991	5.19869	4.59954	4.58145
2810032G03Rik	3.0418	3.0418	3.0418	3.0418	3.0418	3.0418	3.0418	3.0418	3.0418	3.0418	3.0418	3.0418	3.0418	3.0418	3.0418	3.0418	3.0418	3.0418	3.0418	3.0418	3.37344	3.35796	3.0418	3.0418	3.0418	3.0418	3.34794	3.0418	3.0418	3.0418	3.0418	3.0418	3.0418	3.0418	3.0418	3.0418	3.0418	3.0418	3.0418	3.72997	3.0418	3.0418	3.0418	3.0418	3.0418	3.0418	3.0418	3.0418	3.0418
2810047C21Rik1	3.0418	3.0418	3.0418	3.0418	3.0418	3.0418	3.0418	3.0418	3.0418	3.0418	3.0418	3.0418	3.0418	3.0418	3.0418	3.0418	3.0418	3.0418	3.0418	3.0418	3.0418	3.0418	3.0418	3.0418	3.0418	3.0418	3.0418	3.0418	3.55793	3.73911	3.0418	3.0418	3.0418	3.0418	3.0418	3.0418	3.0418	3.0418	3.0418	3.0418	3.0418	3.0418	3.0418	3.0418	3.0418	3.0418	3.64758	3.0418	3.45704
2810049E08Rik	3.0418	3.0418	3.0418	3.0418	3.0418	3.0418	3.0418	3.0418	3.0418	3.0418	3.0418	3.0418	3.0418	3.0418	3.0418	3.0418	3.0418	3.0418	3.0418	3.0418	3.0418	3.0418	3.0418	3.0418	3.0418	3.0418	3.0418	3.0418	3.0418	3.0418	3.0418	3.0418	3.0418	3.40188	3.0418	3.0418	3.0418	3.0418	3.0418	3.0418	3.0418	3.0418	3.0418	3.0418	3.0418	3.0418	3.0418	3.0418	3.0418
2810055G20Rik	3.0418	3.0418	3.0418	3.48967	3.0418	3.0418	3.39806	3.0418	3.0418	3.0418	3.0418	3.0418	3.0418	3.0418	3.0418	3.0418	3.0418	3.0418	3.46464	3.45895	3.0418	3.0418	3.0418	3.0418	3.0418	3.0418	3.47394	3.0418	3.0418	3.0418	3.0418	3.0418	3.74308	3.75649	3.0418	3.0418	3.43815	3.0418	3.0418	3.88077	3.57998	3.0418	3.62738	3.0418	3.0418	3.0418	3.0418	3.0418	3.0418
2810403A07Rik	10.7905	10.7573	10.7919	10.6629	10.6746	10.7273	10.7272	10.6439	10.6731	10.685	10.6425	10.7035	10.8387	10.8627	10.6594	10.6931	10.5776	10.5596	10.5499	10.6294	10.5925	10.6434	10.7202	10.683	10.7623	10.7741	10.5724	10.5481	10.7091	10.5129	11.7878	10.6387	10.6731	10.6665	10.6117	10.8488	10.902	10.708	10.8674	10.6382	10.6902	10.7037	10.7952	10.56	10.8063	10.6939	10.936	10.9036	10.7037
2810403D21Rik	5.07344	5.01646	5.64226	5.76622	4.76557	4.9005	4.84542	4.74709	4.85124	4.67632	5.0187	4.94272	4.63962	4.89637	4.63441	4.67892	4.6438	4.8665	4.39865	4.43689	4.78446	4.78162	5.13449	4.64748	4.78669	4.84477	4.48361	4.53137	5.07164	4.73762	4.54259	4.95297	4.96171	5.22277	5.17572	5.22921	5.16365	5.49324	5.64849	4.77391	4.77189	5.14328	5.2777	5.19598	5.15458	5.02136	5.19869	4.81537	5.3546
2810404M03Rik	3.0418	3.0418	3.0418	3.0418	3.0418	3.0418	3.0418	3.0418	3.0418	3.0418	3.0418	3.0418	3.0418	3.0418	3.0418	3.0418	3.0418	3.0418	3.0418	3.0418	3.0418	3.0418	3.0418	3.0418	3.0418	3.0418	3.0418	3.0418	3.0418	3.0418	3.0418	3.0418	3.0418	3.0418	3.0418	3.47886	3.0418	3.0418	3.0418	3.0418	3.0418	3.0418	3.0418	3.0418	3.0418	3.0418	3.0418	3.0418	3.0418
2810405F15Rik	3.0418	3.0418	3.0418	3.0418	3.0418	3.0418	3.0418	3.0418	3.0418	3.0418	3.0418	3.0418	3.0418	3.0418	3.0418	3.0418	3.0418	3.0418	3.0418	3.0418	3.0418	3.0418	3.0418	3.0418	3.0418	3.0418	3.34794	3.0418	3.0418	3.0418	3.0418	3.0418	3.0418	3.0418	3.0418	3.0418	3.43815	3.0418	3.0418	3.0418	3.0418	3.0418	3.0418	3.0418	3.0418	3.0418	3.0418	3.0418	3.45704
2810408A11Rik	5.56433	5.38672	4.70372	4.74061	4.79607	5.09018	4.78894	5.08023	5.46107	5.36366	5.0187	4.8492	4.97792	4.61781	5.14141	5.33589	5.12379	5.34362	4.78375	4.72132	6.15922	6.37078	4.73725	5.26425	4.78669	5.20507	5.19283	5.07158	5.77203	5.17685	5.3673	5.40058	5.48286	5.5868	5.17572	5.06544	5.1368	4.8672	4.71012	5.65686	5.24281	5.80337	5.58707	5.8924	6.08971	5.99229	4.63138	5.45938	5.3546
2810408I11Rik	6.54493	6.32364	6.52931	6.4545	6.37204	6.08449	6.19144	6.14436	5.86878	5.73605	6.29914	5.90457	5.99973	6.39437	5.59571	6.10818	6.07444	5.83528	5.51162	5.61648	5.45181	5.25241	6.30992	5.8922	5.93915	5.93416	5.50781	5.78016	6.71852	6.46404	4.54259	7.6517	7.96214	7.44615	7.76856	6.81494	6.94101	6.89688	7.2173	6.68221	6.65833	6.72682	6.49171	6.97856	6.99588	6.69878	7.01569	6.85079	7.11117
2810408M09Rik	8.28971	8.29058	8.5102	8.49623	7.97184	8.03072	8.22105	8.23348	7.90645	7.78734	7.88424	7.94078	8.32084	8.31843	7.92168	7.87155	7.96343	8.13853	8.08748	7.96889	7.86942	7.79857	7.86315	8.09712	8.26376	8.25238	7.86295	7.94258	7.84737	8.03018	8.15439	7.66127	7.63443	7.75987	7.46884	7.66339	7.64848	7.95303	7.75872	8.04166	7.74022	7.78849	7.73363	8.12184	7.81715	7.95312	7.9122	8.03816	8.24826
2810410L24Rik	4.71024	4.64403	4.46671	3.81149	3.99191	4.07491	4.1954	4.06321	4.03441	4.0996	4.18146	4.08052	4.55262	4.47449	4.50095	4.03111	3.92875	3.79348	3.0418	3.75942	4.07089	4.19608	3.89162	3.87509	4.35579	3.83361	3.89674	3.97417	4.17288	4.31715	5.14726	3.94554	4.02426	4.15555	4.08947	3.47886	4.47037	3.90095	3.59585	4.00621	4.16174	4.23294	3.95855	3.55409	3.96754	3.98149	3.64758	3.84851	4.04227
2810417H13Rik	11.8399	11.9102	12.0684	12.0036	10.9074	11.0313	11.0741	11.2682	11.1978	11.0346	11.1075	10.9168	11.0362	11.3387	10.9734	11.1071	11.0127	11.0336	10.8419	10.9787	10.7604	10.7414	11.0888	10.9151	11.2439	11.2032	10.9309	11.17	11.9385	11.555	4.54259	10.6362	11.0073	10.512	10.9967	11.8935	12.0497	11.8257	12.0138	11.844	11.8112	11.8394	12.0185	11.6467	11.7676	11.9445	11.6112	11.6884	11.8729
2810428I15Rik	8.14824	8.38749	8.60363	8.5496	7.56283	7.63486	7.5563	8.03458	8.06195	8.16062	7.67062	7.63875	7.49779	7.63264	8.10999	7.99555	7.61462	7.83605	7.64865	7.60731	8.26987	7.93373	7.70923	7.54904	7.68549	7.61529	7.82077	8.24335	8.24735	9.26592	8.02144	9.26984	8.60132	9.03981	8.3683	8.56823	8.17147	8.71893	7.98588	8.95312	8.90006	8.49505	8.60378	8.66019	8.8276	8.78841	8.46635	8.764	9.07256
2810429I04Rik	4.80074	4.90443	4.06899	4.2757	3.99191	4.31619	4.66734	4.40283	4.07678	3.9278	3.98009	4.51493	4.39061	4.52433	4.30742	4.15766	4.17556	4.12874	4.13797	4.12378	4.11895	3.86859	4.22742	4.30956	4.69317	4.52787	4.19846	4.24109	4.80154	4.79486	5.3673	4.69307	4.8588	4.71501	4.72115	4.38063	4.96268	4.0292	4.74714	4.45796	4.83742	4.80216	4.87206	4.52109	4.42651	4.61865	4.29641	4.59954	4.37572
2810433D01Rik	3.0418	3.0418	3.0418	3.0418	3.0418	3.0418	3.0418	3.0418	3.0418	3.0418	3.0418	3.0418	3.0418	3.0418	3.0418	3.0418	3.0418	3.0418	3.0418	3.0418	3.0418	3.0418	3.0418	3.0418	3.0418	3.0418	3.0418	3.0418	3.0418	3.0418	3.0418	3.0418	3.0418	3.0418	3.0418	3.0418	3.0418	3.0418	3.0418	3.0418	3.0418	3.0418	3.0418	3.0418	3.0418	3.0418	3.0418	3.0418	3.0418
2810442I21Rik	5.84713	5.89632	6.15482	6.35836	5.53015	5.69723	5.85031	5.63013	5.83113	5.97984	6.04334	5.51531	5.94956	5.92518	5.81445	5.67511	5.2991	5.36761	5.51162	5.48439	6.16814	5.8826	5.50353	5.66458	5.87512	5.93416	5.41957	5.60797	6.38958	6.27398	3.0418	6.64276	6.68829	6.49139	6.95042	6.71329	5.97562	6.59966	6.57082	6.52538	6.59875	6.4913	6.60903	6.17382	6.28865	6.24591	6.59705	6.2881	6.95152
2810442N19Rik	3.0418	3.0418	3.0418	3.0418	3.67012	3.73856	3.39806	3.46602	3.71809	3.55864	3.71101	4.08052	3.37071	3.0418	3.39016	3.84041	3.0418	3.53704	3.0418	3.0418	3.0418	3.0418	3.53713	3.78914	3.40429	3.0418	3.47394	3.0418	3.0418	3.89182	3.0418	3.94554	3.0418	3.54972	3.79057	3.79319	4.07172	4.33038	4.13069	3.53069	3.69906	3.89567	3.45728	3.0418	3.58233	3.43106	4.07645	3.84851	3.62704
2810454H06Rik	5.17446	5.24495	5.25577	4.91778	4.52663	4.54594	4.1954	4.61207	4.76825	4.583	3.71101	4.48213	4.55262	4.66183	4.30742	4.43853	4.32526	4.28771	4.39865	4.58798	4.28978	4.34143	4.84912	4.84819	4.51845	4.38184	4.12223	4.45018	5.25279	5.21747	5.97089	5.35231	5.66837	5.60266	5.54781	5.42878	4.96268	5.23776	5.70194	5.88863	5.51438	5.63682	5.35571	5.39725	5.73356	5.8914	5.6361	5.30066	5.1354
2810459M11Rik	3.48085	3.0418	3.0418	3.0418	3.67012	4.01804	3.74903	3.77143	4.55715	4.53332	3.98009	3.9163	3.50595	3.0418	4.75403	4.50363	4.3706	4.54645	4.45466	4.87862	5.37497	5.4965	3.73895	4.02253	3.0418	3.44142	4.53779	4.95378	4.05841	3.89182	3.86928	3.45123	3.74308	4.04269	3.57419	3.65758	3.0418	3.90095	3.99018	5.19283	5.51438	4.13403	4.53429	3.55409	4.90685	4.80291	3.64758	4.25419	4.37572
2810468N07Rik	4.80074	4.9429	4.53078	4.2757	3.76545	3.95709	4.03244	4.14142	3.71809	3.55864	3.71101	3.97471	4.425	4.36738	3.53327	3.42199	4.17556	3.61273	3.76908	3.96214	3.61373	3.48803	4.01857	4.49148	3.98642	4.27193	3.89674	3.77799	4.05841	3.53725	3.86928	4.17442	3.74308	4.3029	4.57489	3.90628	4.13968	4.0292	3.91006	3.88077	4.32499	3.7423	3.62738	3.92015	4.16646	3.98149	4.07645	3.96943	3.86398
2810471M01Rik	3.0418	3.0418	3.0418	3.0418	3.0418	3.0418	3.0418	3.0418	3.0418	3.0418	3.0418	3.0418	3.0418	3.0418	3.0418	3.0418	3.0418	3.0418	3.0418	3.0418	3.0418	3.0418	3.0418	3.0418	3.0418	3.0418	3.0418	3.0418	3.0418	3.0418	3.0418	3.45123	3.0418	3.0418	3.0418	3.47886	3.60058	3.0418	3.0418	3.0418	3.0418	3.0418	3.0418	3.0418	3.0418	3.0418	3.0418	3.51157	3.0418
2810474O19Rik	9.69086	9.61892	10.0011	10.0806	10.258	10.2345	9.88202	9.92863	10.3869	10.4348	10.3472	10.2235	9.74358	9.75763	10.0466	10.0489	10.6476	10.7374	10.2114	10.2461	10.9845	11.0191	10.3548	10.3423	9.81237	9.92028	9.90399	9.7747	10.0402	9.67023	12.5707	10.6543	10.9905	10.7274	11.0166	10.4848	10.3083	10.422	11.0234	10.0524	10.1383	10.5135	10.2776	10.3193	10.4367	10.5381	10.3923	10.3145	9.65896
2900005J15Rik	5.29799	5.80053	5.38697	5.96782	6.11782	6.12612	6.0199	6.06819	6.16838	6.13635	5.82695	6.1543	6.07643	5.84069	6.08882	6.09592	6.70245	6.24182	6.22301	6.0609	6.63967	6.48491	5.9644	6.28057	6.28154	6.1332	5.95187	5.99126	6.64314	6.34608	6.6741	6.1065	6.26882	6.27563	6.19757	6.50976	6.47388	6.1427	6.51327	6.29688	6.12905	6.26619	5.85646	6.01661	6.54725	6.21067	6.62985	6.35239	6.49032
2900008C10Rik	6.40676	6.30993	6.54296	6.64088	7.22217	7.12782	6.68834	6.69086	6.9403	6.96038	7.22407	7.12339	6.58076	6.24601	6.95418	6.95161	7.05738	7.07893	6.87995	6.73685	6.83011	6.61428	6.74157	6.50555	6.14798	6.59283	6.93506	6.68147	6.51356	7.40152	6.18218	7.00132	6.76974	7.07218	6.78132	7.42797	6.42174	7.20313	6.94846	7.4477	7.72842	7.3272	7.35682	7.15952	7.10449	6.90267	7.93847	7.82467	7.65046
2900009J06Rik	3.48085	3.47545	3.5089	3.48967	3.0418	3.0418	3.39806	3.46602	3.0418	3.0418	3.0418	3.0418	3.0418	3.0418	3.0418	3.0418	3.0418	3.0418	3.0418	3.0418	3.0418	3.35796	3.0418	3.41859	3.0418	3.0418	3.0418	3.0418	3.0418	3.53725	3.0418	3.0418	3.0418	3.0418	3.0418	3.90628	3.43815	3.0418	3.43477	3.88077	3.57998	3.53954	3.45728	3.55409	3.0418	3.81346	3.47172	3.0418	3.0418
2900011O08Rik	3.66036	3.47545	3.0418	3.0418	3.0418	3.0418	3.0418	3.0418	3.47186	3.0418	3.0418	3.0418	3.0418	3.45428	3.0418	3.0418	3.40864	3.0418	3.0418	3.0418	3.37344	3.35796	3.0418	3.41859	3.0418	3.0418	3.65069	3.49566	3.0418	3.53725	3.86928	3.0418	3.0418	3.40188	3.0418	3.0418	4.20298	3.0418	3.71833	3.53069	4.03476	3.53954	3.0418	3.0418	3.0418	3.0418	3.64758	3.0418	3.0418
2900026A02Rik	6.92135	6.99593	6.60928	7.15379	9.3326	9.28761	8.94928	9.07078	10.6088	10.6699	8.79977	8.96925	7.40915	7.02031	10.2671	10.265	9.74645	9.90558	10.5723	10.7364	11.1667	11.2693	9.09979	9.39768	7.32928	8.52079	10.4754	10.6988	9.63888	10.0472	4.72433	7.53166	7.11913	7.46737	7.04055	8.3191	6.68298	8.82164	9.10966	8.91652	8.69533	8.79117	8.34757	8.45106	9.25249	9.30974	9.31941	9.11523	9.9308
2900041M22Rik	5.48982	5.21467	5.07084	5.07279	3.55615	3.73856	3.74903	3.77143	3.0418	3.87854	4.34725	4.12899	3.60906	3.62318	3.64229	3.69659	3.99741	3.73882	3.46464	3.86768	4.02006	3.58724	4.12893	4.25863	3.66641	3.44142	3.57008	3.86273	4.05841	4.4757	3.63087	4.23952	4.3241	5.04341	4.57489	4.60569	4.37153	4.62995	4.41107	5.34262	4.95883	5.22605	4.83471	4.66313	4.51478	4.61865	4.58214	4.53868	5.19374
2900052N01Rik	3.0418	3.0418	3.0418	3.0418	3.0418	3.0418	3.0418	3.0418	3.0418	3.0418	3.0418	3.0418	3.0418	3.0418	3.0418	3.0418	3.0418	3.0418	3.0418	3.0418	3.0418	3.0418	3.0418	3.0418	3.0418	3.0418	3.0418	3.0418	3.0418	3.0418	3.0418	3.0418	3.0418	3.0418	3.0418	3.0418	3.0418	3.0418	3.0418	3.0418	3.0418	3.0418	3.0418	3.0418	3.0418	3.0418	3.0418	3.0418	3.0418
2900055J20Rik	3.0418	3.0418	3.0418	3.0418	3.0418	3.0418	3.0418	3.0418	3.0418	3.0418	3.0418	3.0418	3.0418	3.0418	3.0418	3.0418	3.0418	3.0418	3.0418	3.0418	3.0418	3.0418	3.0418	3.0418	3.0418	3.0418	3.0418	3.0418	3.0418	3.0418	3.0418	3.0418	3.0418	3.0418	3.0418	3.0418	3.0418	3.0418	3.43477	3.0418	3.0418	3.0418	3.0418	3.0418	3.0418	3.0418	3.0418	3.0418	3.45704
2900056M20Rik	3.0418	3.0418	3.0418	3.0418	3.0418	3.0418	3.0418	3.0418	3.0418	3.0418	3.0418	3.0418	3.0418	3.0418	3.0418	3.0418	3.0418	3.0418	3.0418	3.0418	3.0418	3.0418	3.0418	3.0418	3.0418	3.0418	3.0418	3.0418	7.91269	7.40988	7.58139	7.67077	8.27589	8.05135	8.56701	7.87504	7.75273	7.69796	8.12276	3.0418	3.0418	3.0418	3.0418	3.0418	3.0418	3.0418	7.61384	7.50545	7.43785
2900057B20Rik	3.0418	3.0418	3.0418	3.0418	3.0418	3.0418	3.0418	3.0418	3.0418	3.0418	3.0418	3.0418	3.0418	3.0418	3.0418	3.0418	3.0418	3.0418	3.0418	3.0418	3.0418	3.0418	3.0418	3.0418	3.0418	3.0418	3.0418	3.0418	3.0418	3.0418	3.0418	3.0418	3.0418	3.0418	3.0418	3.0418	3.0418	3.0418	3.0418	3.0418	3.0418	3.0418	3.0418	3.0418	3.0418	3.0418	3.47172	3.0418	3.0418
2900060B14Rik	6.16252	6.45393	6.52931	6.11042	3.55615	3.39271	3.0418	3.88141	3.47186	3.0418	4.18146	4.12899	3.69544	4.11213	3.0418	3.79578	3.40864	3.79348	3.97436	4.12378	3.50979	3.58724	4.12893	3.87509	3.84411	3.83361	3.47394	3.56516	4.36751	4.2277	5.41704	4.51415	4.55506	4.39035	4.91153	5.48071	4.26237	5.06589	5.12142	4.97744	5.33242	5.00822	5.25064	5.46993	4.87606	4.53591	6.46988	5.95571	5.52058
2900076A07Rik	6.20881	6.52671	6.45905	6.23984	5.75016	5.36689	5.32236	5.81102	5.79244	5.91196	5.51259	5.5007	5.66723	5.71302	5.48777	5.60672	5.47198	5.36761	5.25578	5.36348	6.28734	5.87266	5.59695	5.8056	5.56816	5.37661	5.4707	5.55698	6.40796	5.76705	7.84903	6.36491	5.44932	6.20595	6.02988	6.07147	5.75469	6.22336	6.15919	5.95799	6.4034	6.06472	6.57798	5.83943	6.08971	5.90627	6.28953	6.16801	6.10997
2900079G21Rik	3.0418	3.0418	3.0418	3.0418	3.0418	3.0418	3.0418	3.0418	3.0418	3.0418	3.0418	3.0418	3.37071	3.0418	3.0418	3.0418	3.40864	3.32866	3.63768	3.0418	3.37344	3.0418	3.0418	3.0418	3.0418	3.0418	3.0418	3.49566	3.0418	3.0418	4.32541	3.45123	3.0418	3.40188	3.0418	3.0418	3.0418	3.0418	3.0418	3.72997	3.0418	3.0418	4.04282	3.0418	3.0418	3.0418	3.47172	3.70328	3.45704
2900092C05Rik	3.0418	3.0418	3.0418	3.0418	3.0418	3.0418	3.0418	3.0418	3.34646	3.0418	3.0418	3.0418	3.0418	3.0418	3.0418	3.0418	3.0418	3.0418	3.0418	3.0418	3.37344	3.48803	3.0418	3.0418	3.0418	3.0418	3.0418	3.0418	3.0418	3.0418	3.0418	3.0418	3.0418	3.0418	3.0418	3.0418	3.0418	3.0418	3.0418	3.53069	3.57998	3.0418	3.0418	3.0418	3.0418	3.0418	3.0418	3.0418	3.0418
2900092D14Rik	3.0418	3.0418	3.0418	3.0418	3.0418	3.0418	3.0418	3.0418	3.0418	3.0418	3.0418	3.0418	3.0418	3.0418	3.0418	3.0418	3.0418	3.0418	3.0418	3.0418	3.0418	3.0418	3.0418	3.0418	3.0418	3.0418	3.0418	3.0418	3.0418	3.0418	3.0418	3.0418	3.5401	3.54972	3.79057	3.0418	3.43815	3.0418	3.0418	3.0418	3.69906	3.0418	3.86444	3.0418	3.0418	3.0418	3.0418	3.0418	3.0418
2900097C17Rik	9.14831	9.14811	9.37558	9.33536	8.20971	8.14752	8.31328	8.52524	8.41053	8.32835	7.91695	8.09232	8.22038	8.16323	8.17411	8.26222	7.9819	7.87877	8.1932	8.10239	8.19001	8.19081	8.06696	8.01435	8.27842	8.20026	8.27227	8.34293	9.23171	8.5174	8.7614	7.58793	7.30313	7.35344	7.57584	7.9166	8.58989	8.31308	9.03044	8.58092	8.45901	8.2306	8.46741	8.72605	8.55884	8.75656	8.46032	8.3306	8.52084
3000002C10Rik	4.88494	4.9429	5.03044	5.21102	5.97725	6.07388	6.17111	6.20246	5.96733	5.87674	5.91759	5.92628	6.0193	6.05051	5.69572	5.7948	5.74821	5.75725	5.91244	5.7748	5.25936	5.46999	5.73969	5.82042	5.82169	5.82285	5.56748	5.75791	5.07164	6.15839	4.04864	5.13936	5.30603	5.60266	5.12707	6.16762	5.82149	5.94222	5.59285	5.59958	5.67472	5.90418	5.72835	5.66712	5.79705	6.13741	6.31675	6.11322	6.19469
3010001F23Rik	3.0418	3.0418	3.0418	3.0418	3.0418	3.0418	3.0418	3.0418	3.0418	3.0418	3.0418	3.0418	3.0418	3.0418	3.0418	3.0418	3.0418	3.0418	3.0418	3.0418	3.0418	3.0418	3.0418	3.0418	3.0418	3.0418	3.47394	3.0418	3.0418	3.0418	3.0418	3.0418	3.0418	3.0418	3.0418	3.0418	3.0418	3.0418	3.0418	3.0418	3.0418	3.0418	3.0418	3.0418	3.0418	3.0418	3.0418	3.0418	3.0418
3010026O09Rik	6.98428	7.12598	7.0797	6.91543	7.04215	7.03356	6.87459	6.98164	6.90508	7.03308	6.75277	7.03758	6.95215	6.75516	7.03635	7.04922	6.84438	6.9812	6.76113	6.67909	7.23077	7.17644	6.81919	7.35314	6.79413	6.81406	7.02061	7.18554	7.35873	7.43469	5.26188	7.69425	7.583	7.65287	7.31252	7.27989	6.48408	7.37025	6.96993	7.64676	7.49294	7.89447	7.73363	7.55612	7.66726	7.64892	7.45296	7.49843	7.81375
3010033K07Rik	3.0418	3.0418	3.0418	3.48967	3.0418	3.0418	3.0418	3.0418	3.0418	3.0418	3.0418	3.0418	3.0418	3.45428	3.39016	3.0418	3.0418	3.0418	3.0418	3.0418	3.37344	3.0418	3.0418	3.0418	3.0418	3.0418	3.0418	3.0418	3.0418	3.0418	3.0418	3.0418	3.0418	3.0418	3.0418	3.0418	3.0418	3.0418	3.0418	3.72997	3.0418	3.0418	3.0418	3.55409	3.0418	3.0418	3.0418	3.0418	3.0418
3100003L05Rik	3.0418	3.0418	3.0418	3.0418	3.0418	3.0418	3.0418	3.0418	3.0418	3.0418	3.0418	3.0418	3.0418	3.0418	3.0418	3.0418	3.0418	3.0418	3.0418	3.0418	3.0418	3.0418	3.0418	3.0418	3.0418	3.0418	3.0418	3.0418	3.0418	3.0418	3.0418	3.0418	3.0418	3.0418	3.0418	3.0418	3.0418	3.0418	3.0418	3.0418	3.0418	3.0418	3.0418	3.0418	3.0418	3.0418	3.0418	3.0418	3.0418
3110001I22Rik	7.34061	7.55868	7.69244	7.68473	7.26758	7.15294	7.10452	7.02217	6.84126	6.87941	6.39599	6.85437	6.98694	7.25038	6.971	7.00125	7.05155	6.94709	6.97331	6.7556	6.47084	6.56638	7.0618	7.05418	7.02106	6.98389	6.66935	6.82511	7.20007	6.7288	9.10207	7.00132	7.2189	6.91392	7.00262	7.05796	7.37108	7.24198	7.29865	6.8112	6.87445	7.38831	7.06138	7.19104	6.7737	7.01505	7.27177	6.86182	7.26129
3110002H16Rik	9.25018	9.24221	9.23043	9.13845	9.52098	9.34414	9.55609	9.27668	9.74094	9.76536	9.47713	9.37676	9.45365	9.49574	9.77824	9.70503	9.47194	9.27465	9.68336	9.62719	9.93624	9.90843	9.56325	9.42283	9.53994	9.46285	9.73531	9.73953	8.99012	9.32007	10.3596	9.55498	9.25432	9.37174	9.01275	9.28566	9.15768	9.09468	8.98914	9.16715	9.34799	8.96133	9.23433	8.88504	8.97744	9.06359	9.24603	9.02295	9.03526
3110007F17Rik	3.79656	3.78741	3.5089	3.81149	3.40646	3.53686	3.0418	3.97733	4.03441	4.01805	3.98009	3.78404	3.37071	3.85862	3.88511	3.88245	3.0418	3.93604	3.46464	3.0418	4.07089	3.74323	3.73895	3.95219	3.98642	3.60516	3.94701	3.90168	3.92661	4.12918	4.32541	3.74631	3.0418	3.40188	3.0418	3.79319	4.26237	4.0292	3.71833	4.38246	4.37401	3.7423	4.25635	3.0418	3.88922	4.05393	3.64758	3.96943	4.4834
3110009E18Rik	5.20645	5.41335	5.25577	5.50389	4.73428	4.51086	5.02493	4.74709	5.31587	5.00749	4.83411	4.94272	5.07935	4.96552	4.86277	5.15214	4.89296	5.28168	5.00786	4.72132	5.11341	5.22049	4.54671	4.78495	4.62644	5.03766	4.97426	5.28966	6.00947	5.96494	4.63702	6.04859	6.04542	6.15398	6.07988	6.08796	6.16626	5.7905	5.38895	6.39935	6.25639	5.75006	6.5569	5.32038	5.34085	5.47579	5.31525	5.48898	6.39848
3110009F21Rik	3.0418	3.0418	3.0418	3.0418	3.0418	3.0418	3.0418	3.0418	3.0418	3.0418	3.0418	3.0418	3.0418	3.0418	3.0418	3.0418	3.0418	3.0418	3.0418	3.0418	3.0418	3.0418	3.0418	3.0418	3.0418	3.0418	3.0418	3.0418	3.0418	3.0418	3.0418	3.0418	3.0418	3.0418	3.0418	3.0418	3.0418	3.0418	3.0418	3.0418	3.0418	3.0418	3.0418	3.0418	3.0418	3.0418	3.0418	3.0418	3.0418
3110015C05Rik	3.0418	3.0418	3.0418	3.0418	3.0418	3.0418	3.0418	3.0418	3.0418	3.0418	3.0418	3.0418	3.0418	3.0418	3.0418	3.0418	3.0418	3.0418	3.0418	3.0418	3.0418	3.0418	3.0418	3.0418	3.0418	3.0418	3.0418	3.0418	3.0418	3.0418	3.0418	3.0418	3.5401	3.0418	3.79057	3.90628	3.72407	3.74667	3.59585	3.0418	3.0418	3.0418	3.0418	3.0418	3.0418	3.0418	4.07645	4.33287	4.37572
3110021A11Rik	3.91013	3.47545	3.0418	4.02797	3.67012	3.64666	3.65579	3.77143	3.56755	3.63755	3.0418	3.85314	3.90114	3.9521	3.73356	3.69659	3.55921	3.73882	3.87872	3.75942	3.77702	3.35796	3.53713	4.02253	4.1627	4.00575	3.72133	3.86273	4.05841	4.54704	3.63087	4.02871	3.74308	4.10089	3.95391	4.00486	4.07172	3.0418	4.13069	3.53069	4.27351	3.7423	3.75658	3.55409	3.96754	4.18314	4.15559	3.84851	3.86398
3110021N24Rik	4.00912	3.89967	3.96428	3.81149	3.84881	3.73856	4.09008	3.88141	3.64778	3.55864	3.71101	3.85314	3.83903	3.9521	3.53327	3.84041	3.55921	3.53704	3.63768	3.86768	3.70079	3.35796	3.0418	4.02253	3.9185	3.72963	3.47394	3.62615	3.76793	4.12918	3.0418	3.94554	4.13521	4.77624	4.78799	4.31616	4.13968	4.0292	3.99018	3.88077	3.69906	4.02319	4.25635	4.35818	4.03899	3.98149	3.98954	3.96943	3.62704
3110035E14Rik	3.0418	3.0418	3.5089	3.48967	3.0418	3.0418	3.0418	3.0418	3.0418	3.0418	3.0418	3.0418	3.0418	3.0418	3.0418	3.0418	3.0418	3.0418	3.0418	3.0418	3.0418	3.0418	3.0418	3.0418	3.0418	3.0418	3.0418	3.0418	3.0418	3.0418	3.0418	3.0418	3.0418	3.0418	3.0418	3.0418	3.0418	3.0418	3.0418	3.72997	3.42345	3.0418	3.0418	3.0418	3.42512	3.0418	3.0418	3.0418	3.0418
3110039I08Rik	3.0418	3.0418	3.0418	3.0418	3.0418	3.0418	3.0418	3.0418	3.0418	3.0418	3.0418	3.0418	3.0418	3.0418	3.0418	3.0418	3.0418	3.0418	3.46464	3.0418	3.0418	3.0418	3.0418	3.0418	3.0418	3.0418	3.0418	3.30456	3.0418	3.0418	3.0418	3.0418	3.0418	3.0418	3.0418	3.0418	3.0418	3.0418	3.0418	3.0418	3.42345	3.0418	3.0418	3.0418	3.0418	3.0418	3.0418	3.0418	3.0418
3110039M20Rik	3.66036	3.0418	3.0418	3.0418	3.0418	3.0418	3.0418	3.0418	3.0418	3.0418	3.0418	3.0418	3.0418	3.0418	3.0418	3.0418	3.0418	3.0418	3.0418	3.0418	3.0418	3.0418	3.0418	3.0418	3.0418	3.0418	3.0418	3.0418	3.0418	3.0418	3.0418	3.0418	3.0418	3.0418	3.0418	3.0418	3.0418	3.0418	3.0418	3.53069	3.0418	3.0418	3.45728	3.0418	3.0418	3.0418	3.0418	3.0418	3.0418
3110040N11Rik	8.23919	8.1941	8.43955	8.49623	7.20151	7.29957	7.13083	7.53979	7.45079	7.35608	7.18872	7.29337	7.04939	7.06498	7.4215	7.45706	7.14213	7.43902	7.41517	7.5335	7.49885	7.31998	7.49818	7.1892	7.10592	7.26694	7.19256	7.40483	8.41892	7.87591	7.44945	8.14968	8.20968	7.90678	8.22789	8.38963	7.9556	8.28551	8.47177	8.39282	8.41556	8.19202	8.2757	8.25674	8.09248	7.98785	8.2907	8.21123	8.92334
3110043O21Rik	9.8167	9.98721	9.36609	9.43044	9.02208	9.22169	9.18527	9.09369	8.63053	8.56661	8.8056	8.96153	8.81127	8.85269	8.66414	8.69376	8.78052	8.84216	9.92881	9.81103	8.14613	8.14901	8.80311	9.14182	8.85866	8.91228	8.66268	8.77256	9.89763	9.55832	11.13	10.2041	10.1531	9.64325	9.95069	9.25542	9.15135	9.3708	9.14142	8.45698	8.65023	8.53026	8.55711	9.76578	9.22455	8.81765	8.82866	8.88993	9.71546
3110045C21Rik	5.3836	5.35955	5.58955	5.275	4.82582	5.34894	5.18213	4.90627	4.78954	4.91899	5.25336	4.79963	4.82052	4.7848	4.98642	4.7145	5.21438	5.13416	4.86306	4.91497	4.43571	4.55537	5.09117	5.14812	5.05507	4.80948	4.51103	4.72861	5.44893	5.04675	3.86928	3.85269	4.23421	4.04269	4.08947	5.75641	5.42761	6.1218	5.78666	5.93525	5.09573	5.18532	5.87382	5.46993	5.4848	5.53521	5.76198	5.19542	5.62776
3110052M02Rik	6.95765	6.99593	6.82531	7.07006	7.1047	7.34384	6.69543	6.9651	7.8172	7.69849	7.03788	7.09536	6.97214	6.86887	7.78932	7.78	7.46059	7.37216	7.42719	7.27327	8.72829	8.64051	7.00766	7.44977	6.91209	6.76401	7.64385	7.69774	8.43234	7.45099	7.74036	7.6029	7.9035	7.66393	7.84894	7.38249	7.25741	7.27045	7.37563	7.32389	6.99789	7.37111	7.3385	7.18061	7.39329	7.45385	6.82167	6.62331	7.35532
3110056K07Rik	5.76614	5.69759	5.943	6.04094	6.24558	6.23464	6.25073	6.24451	6.35082	6.13635	6.23068	6.26848	6.36245	6.23291	6.42018	6.50907	6.1862	5.95629	5.87721	6.13498	6.49219	6.49134	6.00976	6.26993	6.13716	6.19794	6.24552	6.25011	6.77607	6.41469	9.11662	6.41136	6.84678	6.74989	7.00262	6.50976	6.76039	6.65851	7.07934	6.61306	6.68311	6.8931	6.42338	6.33429	6.70215	6.6029	6.69326	6.54321	6.61782
3110057O12Rik	8.21699	8.13756	8.20834	8.11392	7.9286	8.17224	8.31098	8.08503	8.54766	8.44946	8.02092	8.11803	8.19941	8.38726	8.11754	8.36277	8.01515	7.34916	8.05303	7.70177	8.13943	8.018	7.63278	8.71114	8.20104	8.01391	7.92621	8.23156	9.37519	8.49403	7.85773	8.3899	8.67675	8.87841	9.06869	7.88438	8.19939	7.98768	7.42303	8.12797	7.69647	8.16239	8.43622	7.11638	6.92093	8.87439	7.69828	8.15879	6.99118
3110062M04Rik	6.69258	6.67267	6.55647	6.58143	6.47952	6.4782	6.36231	6.11439	6.15332	6.26369	6.48663	6.59811	6.47229	6.42915	6.18895	6.18535	6.70989	6.46302	6.68276	6.67909	6.67737	6.61428	6.47954	6.61851	6.36712	6.38715	6.11818	6.22359	6.29386	6.21737	5.97089	6.67158	6.30588	6.6189	6.12815	6.47281	6.52418	6.4904	6.19643	6.66865	6.44275	6.45891	6.44652	6.39005	6.49162	6.01982	6.38258	6.67432	6.84295
3110070M22Rik	4.71024	4.59446	4.8063	4.64114	4.22133	3.95709	4.03244	4.21354	3.98985	3.97417	3.98009	4.02925	4.39061	4.1825	4.34907	4.39285	4.06085	4.12874	3.97436	4.32302	4.07089	3.74323	3.53713	4.25863	4.1627	4.27193	4.03907	3.93875	4.53141	4.2277	4.32541	3.85269	4.02426	3.75649	4.08947	4.60569	4.51661	4.33038	4.59148	4.77391	4.21923	4.32274	4.75638	4.52109	4.27865	4.29681	4.41994	4.71237	4.71434
3110079O15Rik	3.0418	3.0418	3.0418	3.0418	3.0418	3.0418	3.0418	3.0418	3.0418	3.0418	3.0418	3.0418	3.37071	3.0418	3.0418	3.0418	3.0418	3.0418	3.0418	3.0418	3.0418	3.0418	3.0418	3.41859	3.0418	3.0418	3.0418	3.30456	3.0418	3.0418	3.0418	3.0418	3.0418	3.0418	3.0418	3.0418	3.0418	3.0418	3.0418	3.0418	3.0418	3.0418	3.0418	3.0418	3.0418	3.0418	3.0418	3.0418	3.0418
3110082I17Rik	9.36563	9.37522	9.75582	9.65609	9.55587	9.41519	9.39884	9.42556	8.95062	9.00104	9.30675	9.32756	9.16362	9.11857	9.05035	8.98422	9.33872	9.43032	9.58104	9.5385	8.82465	8.68991	9.4363	9.35723	9.44252	9.41123	9.22157	9.47209	8.72174	9.13107	5.14726	9.0835	8.97019	9.03981	8.86611	9.2153	9.20433	9.36423	9.06564	9.33654	9.52644	9.22752	9.20773	9.43054	9.1463	9.24952	9.17424	9.33387	9.91754
3110082J24Rik	3.0418	3.0418	3.0418	3.0418	3.0418	3.0418	3.0418	3.0418	3.0418	3.0418	3.0418	3.0418	3.0418	3.0418	3.0418	3.0418	3.0418	3.0418	3.0418	3.0418	3.0418	3.0418	3.0418	3.0418	3.0418	3.0418	3.0418	3.0418	3.0418	3.0418	3.0418	3.0418	3.0418	3.0418	3.0418	3.0418	3.0418	3.0418	3.0418	3.0418	3.0418	3.0418	3.0418	3.0418	3.0418	3.0418	3.0418	3.0418	3.0418
3110099E03Rik	3.0418	3.47545	3.0418	3.0418	3.0418	3.0418	3.39806	3.0418	3.0418	3.0418	3.0418	3.0418	3.0418	3.0418	3.0418	3.0418	3.0418	3.0418	3.0418	3.0418	3.0418	3.0418	3.0418	3.0418	3.0418	3.0418	3.0418	3.0418	3.0418	3.0418	3.0418	3.45123	3.0418	3.0418	3.0418	3.0418	3.43815	3.0418	3.43477	3.0418	3.42345	3.0418	3.45728	3.0418	3.0418	3.0418	3.64758	3.0418	3.0418
3200001D21Rik	4.61223	4.48831	4.16255	4.47368	4.40644	4.17885	4.1954	4.28064	4.11722	3.9278	4.49006	4.37736	4.28006	3.85862	4.12076	4.21496	4.27783	4.31664	4.13797	4.43689	3.90809	4.2714	4.31686	4.40441	3.76121	4.27193	4.26906	4.04077	4.05841	3.53725	4.88185	4.4127	3.74308	3.9128	4.08947	3.47886	4.3184	3.74667	4.30811	4.30112	4.21923	4.13403	4.04282	4.84833	4.51478	3.81346	4.15559	3.84851	4.4834
3300002I08Rik	4.75635	4.86474	4.53078	4.53231	4.05501	4.01804	3.83058	3.63962	3.89271	4.17438	3.98009	3.78404	3.77107	3.85862	3.88511	4.09661	4.06085	3.89146	4.13797	3.75942	4.28978	4.23447	3.89162	4.25863	3.66641	3.92439	4.16112	3.90168	4.60506	4.12918	4.04864	4.51415	4.40673	4.39035	3.95391	4.09306	4.42209	4.56231	4.45902	4.21267	4.21923	4.13403	4.04282	4.26617	4.27865	3.90206	4.15559	3.96943	4.37572
3300005D01Rik	3.66036	4.23838	4.46671	4.02797	4.82582	4.7936	4.41772	4.34354	3.47186	3.70672	3.98009	4.12899	3.77107	4.03583	3.39016	3.64038	4.53482	4.81267	3.46464	3.45895	3.90809	3.97577	4.39908	3.87509	4.10772	3.44142	3.34794	3.30456	3.55793	4.0188	3.63087	5.35231	5.41491	5.22277	5.17572	4.9936	3.91734	5.06589	5.41079	4.1153	4.32499	4.32274	4.19043	5.5389	4.87606	4.24162	5.74179	4.76498	6.22183
3425401B19Rik	3.0418	3.0418	3.0418	3.0418	3.0418	3.0418	3.0418	3.0418	3.0418	3.0418	3.0418	3.0418	3.0418	3.0418	3.0418	3.0418	3.0418	3.0418	3.0418	3.0418	3.70079	3.6704	3.0418	3.41859	3.0418	3.0418	3.47394	3.0418	3.0418	3.0418	3.0418	3.0418	3.0418	3.0418	3.0418	3.0418	3.0418	3.0418	3.0418	3.0418	3.0418	3.0418	3.45728	3.0418	3.0418	3.0418	3.47172	3.0418	3.45704
3632451O06Rik	3.0418	3.0418	3.0418	3.0418	3.0418	3.0418	3.39806	3.0418	3.0418	3.0418	3.0418	3.0418	3.37071	3.0418	3.39016	3.0418	3.0418	3.32866	3.0418	3.0418	3.50979	3.0418	3.0418	3.69079	3.0418	3.44142	3.0418	3.41288	3.76793	3.0418	3.63087	3.0418	3.5401	3.40188	3.57419	3.0418	3.0418	3.0418	3.43477	4.00621	3.57998	3.0418	3.0418	3.0418	3.0418	3.43106	3.0418	3.51157	3.0418
3632454L22Rik	3.0418	3.47545	3.0418	3.0418	3.40646	3.0418	3.54436	3.0418	3.94275	4.0996	3.0418	3.78404	3.0418	3.0418	3.9506	4.09661	3.0418	3.61273	3.0418	3.0418	4.5941	4.34143	3.73895	3.57317	3.66641	3.72963	3.47394	3.68106	3.76793	3.53725	4.32541	3.74631	3.5401	3.75649	4.2071	3.47886	3.82725	3.54267	4.19352	3.72997	3.9636	3.53954	3.45728	3.0418	3.70192	3.90206	3.89244	3.96943	4.25569
3830403N18Rik	4.25257	4.08514	4.32591	4.34594	3.76545	3.81897	3.74903	3.88141	3.78132	4.01805	3.71101	3.78404	3.60906	3.62318	3.64229	3.84041	3.40864	3.6791	3.46464	3.0418	3.37344	3.48803	3.73895	3.78914	3.76121	3.72963	3.65069	3.82162	5.33475	4.39939	4.43946	4.6071	4.80393	4.65044	4.72115	5.06544	4.20298	5.19688	5.36675	3.88077	3.57998	4.32274	3.95855	3.92015	3.70192	3.90206	4.63138	4.33287	4.79528
3830406C13Rik	7.54486	7.57582	7.95828	8.08017	7.53424	7.74119	7.57937	7.61045	7.96515	7.73034	7.65777	7.66119	7.48049	7.7646	7.86302	7.85908	7.93528	7.80684	7.5532	7.5866	7.58034	7.66926	7.74928	7.815	7.72172	7.7017	7.75508	7.87002	8.56412	7.91752	7.5059	8.43237	8.99847	8.52139	8.73779	8.64163	8.69164	8.55161	8.93941	8.57732	8.60152	8.52251	8.75618	8.04933	8.43748	8.6083	8.27018	8.33454	8.50455
3830408C21Rik	4.09768	4.16488	3.5089	3.67269	4.79607	4.17885	4.29026	4.40283	4.81045	4.67632	4.92982	4.79963	4.61135	4.52433	4.75403	4.83132	4.89296	4.63501	4.45466	4.38149	4.90401	4.71094	4.61378	5.3293	4.78669	4.38184	4.53779	4.67805	4.97049	5.00027	4.72433	5.01819	5.41491	5.60266	5.58344	5.13345	4.93118	5.06589	5.06628	4.92961	5.0695	5.3039	5.42939	4.72811	5.34085	5.62879	5.16786	4.9985	4.58145
3830417A13Rik	3.0418	3.0418	3.0418	3.0418	3.0418	3.0418	3.0418	3.0418	3.0418	3.0418	3.0418	3.0418	3.0418	3.0418	3.0418	3.0418	3.0418	3.0418	3.0418	3.0418	3.0418	3.0418	3.0418	3.0418	3.0418	3.0418	3.34794	3.0418	3.0418	3.0418	3.0418	3.0418	3.0418	3.0418	3.0418	3.0418	3.0418	3.0418	3.0418	3.53069	3.0418	3.0418	3.0418	3.0418	3.0418	3.0418	3.0418	3.0418	3.0418
3930402G23Rik	3.0418	3.65281	3.5089	3.48967	3.67012	3.53686	3.39806	3.63962	3.56755	3.70672	3.71101	3.37666	3.60906	3.9521	3.39016	3.42199	3.85353	3.32866	4.05998	3.62972	3.37344	3.35796	3.0418	3.41859	3.55311	3.60516	3.72133	3.56516	4.05841	3.73911	3.0418	3.45123	3.0418	3.0418	3.79057	3.0418	3.0418	3.54267	3.43477	3.53069	3.69906	4.02319	3.45728	3.92015	3.42512	3.81346	3.47172	3.51157	3.45704
4430402I18Rik	3.48085	4.23838	3.69955	4.11812	3.40646	3.89115	3.65579	3.46602	3.71809	3.82584	3.0418	3.85314	3.83903	3.7515	3.53327	3.57794	4.22803	3.84412	4.05998	3.86768	3.61373	3.35796	3.73895	3.87509	3.76121	3.72963	3.47394	3.56516	4.27493	3.73911	3.86928	3.74631	3.89661	4.10089	3.79057	3.90628	3.72407	4.0292	3.91006	4.1153	4.03476	4.32274	4.11961	4.26617	3.88922	4.24162	3.78108	3.51157	4.31747
4631405J19Rik	3.48085	3.65281	3.844	3.92718	3.99191	4.01804	3.97064	3.77143	4.03441	4.05977	3.0418	3.9163	4.199	3.62318	3.88511	4.06447	4.22803	3.93604	4.13797	3.96214	4.32823	4.37473	3.89162	3.78914	3.84411	4.00575	3.99431	3.86273	3.55793	3.89182	4.32541	3.61891	3.89661	3.9128	3.79057	3.79319	3.43815	3.74667	4.25248	3.0418	3.57998	3.53954	3.75658	3.92015	3.58233	3.43106	3.78108	3.96943	3.0418
4632415L05Rik	8.01729	8.12986	8.09334	8.29031	7.56283	7.83711	8.10143	8.28086	7.59556	7.5333	7.74541	7.68954	8.09204	8.08249	7.68139	7.637	7.61066	7.56905	7.75256	8.00051	7.71269	7.36944	7.911	7.75581	7.97675	8.06966	7.54937	7.5744	8.6199	8.27842	8.01368	8.30406	8.2805	8.28173	8.32811	8.42845	8.30595	8.40134	8.42089	8.16687	8.16748	8.1969	8.2433	8.41157	8.23381	8.23912	8.36677	8.16766	8.55552
4632427E13Rik	5.86665	5.58629	5.69303	5.78775	4.52663	4.67631	4.66734	4.45898	5.03716	4.80373	5.17977	4.72124	4.95661	4.7848	4.86277	4.87813	4.80545	4.83088	4.60736	4.76261	4.73313	5.17112	4.39908	4.44882	4.87347	4.32835	4.75404	4.71199	4.45255	4.61412	5.55606	4.88418	4.91132	4.58208	4.65032	4.38063	4.72311	4.49035	4.97881	4.97744	4.37401	5.09982	4.71521	4.84833	4.77874	5.07738	5.31525	5.04038	4.75549
4632428C04Rik	4.25257	4.30674	4.16255	4.20014	3.92362	3.73856	3.65579	3.63962	4.50445	4.24366	3.71101	3.9163	4.06272	3.45428	3.9506	4.24239	3.7697	3.32866	3.76908	3.62972	4.16461	4.07054	3.89162	3.41859	3.76121	3.60516	4.26906	4.26655	4.05841	4.0188	3.0418	3.0418	3.74308	3.75649	3.0418	3.90628	3.91734	3.54267	3.59585	4.65769	3.88559	3.89567	4.11961	3.76258	4.03899	3.90206	3.47172	4.16871	3.0418
4632428N05Rik	11.1597	11.166	11.1797	11.2373	11.7896	11.8045	10.6854	10.6361	10.4922	10.569	11.3709	11.5853	10.3922	10.0278	10.2065	10.2201	11.9655	12.085	11.807	11.7141	11.7996	11.813	11.3343	11.2566	10.0865	10.114	10.2013	10.1545	9.68443	10.075	12.8304	11.529	11.6234	11.3434	11.4755	11.3993	9.4602	11.4454	11.4724	10.605	11.0232	10.7105	10.9756	11.2018	10.8536	11.0684	11.6665	11.3222	11.9345
4632434I11Rik	10.2654	10.2478	10.7545	10.8019	10.4415	10.4659	10.4073	10.5288	9.8266	9.83957	10.9348	10.7468	10.5627	10.7547	9.85767	9.93904	9.87045	9.90656	9.45342	9.41645	8.96126	9.13829	10.9085	10.2742	10.6523	10.826	9.81974	9.86265	9.81643	9.56019	6.89383	10.3004	10.896	10.5537	11.0015	11.173	11.0343	11.2501	11.5096	10.6622	10.818	10.5989	10.7665	10.4922	10.4276	10.1288	11.2054	10.8468	9.98266
4732416N19Rik	3.79656	3.78741	3.5089	3.81149	3.0418	3.0418	3.0418	3.46602	3.64778	3.34126	3.0418	3.37666	3.0418	3.62318	3.64229	3.31103	3.0418	3.32866	3.0418	3.0418	3.0418	3.35796	3.0418	3.0418	3.40429	3.44142	3.0418	3.30456	3.0418	3.0418	4.04864	3.0418	3.0418	3.54972	4.2071	3.79319	3.43815	3.74667	3.59585	3.72997	3.69906	3.7423	3.45728	3.55409	3.42512	3.0418	3.89244	3.0418	3.0418
4732456N10Rik	3.0418	3.0418	3.0418	3.0418	3.0418	3.0418	3.0418	3.0418	3.0418	3.0418	3.0418	3.0418	3.0418	3.0418	3.0418	3.0418	3.0418	3.0418	3.0418	3.0418	3.0418	3.0418	3.0418	3.0418	3.0418	3.0418	3.34794	3.0418	3.0418	3.53725	3.0418	3.0418	3.0418	3.0418	3.0418	3.0418	3.43815	3.0418	3.0418	3.0418	3.0418	3.0418	3.45728	3.0418	3.0418	3.0418	3.0418	3.0418	3.0418
4732471J01Rik	4.71024	4.59446	4.06899	4.34594	4.448	4.27249	4.56706	4.21354	5.08798	5.13737	4.18146	4.41343	4.31825	4.57203	5.18247	5.36766	4.45581	4.25792	4.82405	5.23048	5.51027	5.34375	4.47538	4.30956	4.48002	4.07992	5.2234	4.93998	5.20981	5.21747	4.80564	4.4127	4.13521	4.74602	4.78799	4.38063	4.96268	4.14066	4.25248	4.71722	4.55028	4.4819	4.67256	4.26617	4.47154	4.49214	4.15559	4.65732	3.95803
4732490B19Rik	3.0418	3.0418	3.69955	3.67269	3.0418	3.0418	3.0418	3.0418	3.0418	3.0418	3.71101	3.0418	3.37071	3.0418	3.39016	3.0418	3.0418	3.32866	3.0418	3.0418	3.70079	3.0418	3.0418	3.41859	3.40429	3.44142	3.47394	3.30456	3.0418	3.53725	3.86928	3.61891	3.0418	3.83887	3.57419	3.47886	3.43815	3.54267	3.82067	3.72997	3.57998	3.0418	4.19043	3.0418	3.0418	3.43106	3.0418	3.96943	3.86398
4732491K20Rik	5.23768	5.18368	5.35537	4.78738	4.448	4.43718	4.56706	4.65883	4.65572	4.69853	4.61642	4.30124	4.28006	4.30945	4.53582	4.50363	4.3706	4.34477	4.45466	4.38149	4.36529	4.19608	4.39908	4.7182	4.39883	4.14837	4.73189	4.55077	4.97049	4.95201	4.43946	5.01819	4.91132	4.77624	4.85131	4.9936	4.76037	4.81213	4.88481	5.15254	4.95883	5.14328	5.10624	5.2802	5.15458	5.2076	4.80993	5.04038	4.94258
4831440E17Rik	4.66226	4.59446	4.8063	4.83241	4.82582	5.27462	4.87271	4.51237	5.66936	5.46379	4.83411	4.87325	4.91289	4.8603	5.2609	5.17657	4.6438	4.96758	4.45466	4.91497	5.85029	5.65723	5.09117	5.26425	4.81631	5.03766	5.12945	5.10855	5.62003	5.00027	7.44945	4.91905	5.26766	4.65044	5.07651	4.79357	5.10938	4.8672	5.24981	5.19283	5.14663	5.22605	5.04364	4.35818	5.31895	5.76635	5.36988	4.9985	4.83379
4833403I15Rik	3.0418	3.0418	3.0418	3.0418	3.0418	3.0418	3.0418	3.0418	3.47186	3.0418	3.0418	3.0418	3.0418	3.0418	3.0418	3.0418	3.0418	3.0418	3.0418	3.0418	3.50979	3.0418	3.0418	3.0418	3.0418	3.0418	3.34794	3.0418	3.0418	3.0418	3.0418	3.0418	3.74308	3.0418	3.0418	3.0418	3.0418	3.0418	3.0418	3.53069	3.0418	3.53954	3.0418	3.0418	3.0418	3.0418	3.0418	3.0418	3.0418
4833411C07Rik	3.0418	3.0418	3.5089	3.0418	3.0418	3.39271	3.0418	3.0418	3.0418	3.0418	3.0418	3.0418	3.0418	3.0418	3.0418	3.0418	3.0418	3.0418	3.0418	3.0418	3.0418	3.0418	3.0418	3.0418	3.0418	3.0418	3.0418	3.0418	3.0418	3.0418	3.0418	3.0418	3.0418	3.0418	3.0418	3.0418	3.0418	3.0418	3.0418	3.0418	3.0418	3.53954	3.62738	3.55409	3.0418	3.0418	3.0418	3.0418	3.0418
4833412C05Rik	3.66036	3.0418	3.0418	3.48967	3.0418	3.0418	3.0418	3.0418	3.0418	3.0418	3.0418	3.0418	3.0418	3.0418	3.39016	3.50677	3.0418	3.0418	3.0418	3.0418	3.0418	3.0418	3.0418	3.0418	3.0418	3.0418	3.34794	3.49566	3.76793	4.2277	3.0418	3.45123	3.0418	3.40188	3.79057	3.65758	3.43815	3.0418	3.0418	3.0418	3.0418	3.53954	3.75658	3.0418	3.0418	3.0418	3.0418	3.70328	3.0418
4833417C18Rik	4.75635	4.86474	4.94556	5.03578	4.91095	5.04536	5.58078	5.39621	5.38383	5.31062	4.61642	4.87325	5.32713	5.39113	5.29842	5.16442	5.12379	5.2943	4.93756	4.91497	5.34296	5.08439	4.61378	4.44882	5.23518	5.15164	5.11311	5.10855	5.16537	5.13493	5.31564	4.77318	5.1453	4.80572	5.17572	4.95609	5.78849	5.23776	5.59285	5.15254	5.01537	5.00822	4.9778	4.59432	4.81205	5.02136	4.76774	5.08093	5.24957
4833418N02Rik	4.32166	4.3708	4.46671	4.2757	4.16913	4.07491	3.97064	3.63962	4.22891	4.36924	4.49006	4.37736	4.49066	4.24802	4.34907	4.36925	4.06085	4.19551	4.20988	3.45895	4.20815	4.11432	4.12893	4.02253	4.59157	4.21212	4.30256	3.97417	4.27493	4.4757	5.31564	4.46461	4.23421	4.39035	3.95391	4.65555	4.42209	4.56231	4.50495	4.30112	4.21923	4.40529	4.6283	4.44271	4.47154	4.29681	4.72401	4.53868	4.04227
4833419F23Rik	6.03105	6.28209	6.70936	6.2243	4.91095	5.13349	4.60147	4.56332	4.44912	4.0996	5.10176	5.42519	5.0597	5.48472	4.30742	4.15766	4.71113	4.93479	5.22726	5.2853	4.36529	4.1561	5.17641	6.02552	4.95454	5.28133	4.16112	4.1026	5.48492	5.36843	3.63087	6.54222	6.78287	6.76373	6.44543	6.86317	5.82149	6.55386	6.35825	6.61306	6.72349	6.59916	6.85304	6.87871	6.63538	6.22251	6.66191	6.55688	6.0505
4833420G17Rik	9.54261	9.43113	9.44031	9.44708	9.79886	9.83584	9.7153	9.76344	9.82836	9.90908	9.70627	9.79456	9.55937	9.8163	9.77029	9.88915	9.54717	9.59112	9.32466	9.48506	9.93173	9.86608	9.56325	9.81909	9.53589	9.68197	9.51227	9.8165	9.9897	9.56953	11.7012	9.26984	9.54812	9.39734	9.52034	9.62043	9.61783	9.53775	10.076	9.74568	9.74589	9.54876	9.9375	9.59619	9.79018	9.91015	9.75915	9.72634	9.79348
4833422C13Rik	3.79656	3.78741	4.06899	3.0418	3.99191	4.12835	3.83058	3.63962	3.78132	3.9278	3.0418	3.85314	4.15577	4.03583	3.81341	4.21496	4.22803	3.84412	3.87872	3.75942	4.02006	3.80871	3.73895	3.57317	3.9185	3.44142	3.57008	4.13199	3.92661	3.53725	3.86928	3.74631	4.02426	4.10089	3.57419	4.38063	3.60058	3.74667	4.41107	4.30112	4.03476	3.53954	3.0418	3.55409	3.42512	3.43106	4.15559	3.96943	3.75618
4833423E24Rik	3.0418	3.0418	3.0418	3.0418	3.0418	3.0418	3.0418	3.0418	3.0418	3.0418	3.0418	3.0418	3.0418	3.0418	3.0418	3.0418	3.0418	3.32866	3.0418	3.0418	3.37344	3.0418	3.0418	3.0418	3.0418	3.44142	3.0418	3.30456	3.0418	3.0418	3.0418	3.0418	3.0418	3.54972	3.0418	3.0418	3.43815	3.0418	3.0418	3.72997	3.42345	3.0418	3.0418	3.0418	3.42512	3.0418	3.0418	3.0418	3.0418
4833424O15Rik	3.0418	3.0418	3.0418	3.0418	3.0418	3.0418	3.0418	3.0418	3.0418	3.0418	3.0418	3.0418	3.0418	3.0418	3.0418	3.0418	3.0418	3.0418	3.63768	3.0418	3.0418	3.0418	3.0418	3.0418	3.40429	3.0418	3.0418	3.41288	3.0418	3.0418	3.0418	3.0418	3.0418	3.0418	3.0418	3.0418	3.0418	3.0418	3.0418	3.0418	3.69906	3.0418	3.45728	3.0418	3.0418	3.0418	3.0418	3.0418	3.0418
4833427F10Rik	3.0418	3.0418	3.0418	3.0418	3.0418	3.0418	3.0418	3.0418	3.0418	3.0418	3.0418	3.0418	3.0418	3.0418	3.0418	3.0418	3.0418	3.0418	3.0418	3.0418	3.0418	3.0418	3.0418	3.0418	3.0418	3.0418	3.0418	3.0418	3.0418	3.0418	3.0418	3.45123	3.5401	3.0418	3.0418	3.0418	3.0418	3.0418	3.0418	3.0418	3.0418	3.0418	3.0418	3.0418	3.0418	3.0418	3.47172	3.70328	3.0418
4833427G06Rik	3.66036	3.0418	3.69955	3.67269	3.0418	3.0418	3.0418	3.0418	3.34646	3.0418	3.0418	3.0418	3.0418	3.0418	3.39016	3.0418	3.40864	3.0418	3.0418	3.0418	3.61373	3.0418	3.0418	3.0418	3.0418	3.0418	3.0418	3.0418	3.0418	3.0418	3.0418	3.45123	3.0418	3.40188	3.57419	3.65758	3.43815	3.54267	3.71833	3.53069	3.42345	3.7423	3.0418	3.0418	3.42512	3.0418	4.15559	3.70328	3.45704
4833428L15Rik	3.0418	3.0418	3.0418	3.0418	3.0418	3.0418	3.0418	3.0418	3.0418	3.0418	3.0418	3.0418	3.0418	3.0418	3.0418	3.0418	3.0418	3.0418	3.0418	3.0418	3.0418	3.0418	3.0418	3.0418	3.0418	3.0418	3.0418	3.0418	3.0418	3.0418	3.0418	3.0418	3.0418	3.0418	3.0418	3.0418	3.0418	3.54267	3.0418	3.0418	3.42345	3.0418	3.0418	3.0418	3.0418	3.0418	3.0418	3.51157	3.45704
4833439L19Rik	9.19637	9.08378	8.93935	8.90311	8.73553	8.76953	8.9654	8.82137	9.48004	9.40055	8.86264	8.80498	8.98661	8.9763	9.36842	9.4495	8.98645	9.01613	9.34378	9.40322	10.0387	9.912	8.92454	8.98173	9.08384	8.99194	9.49227	9.53044	9.89117	9.86643	10.2133	9.54599	9.75115	9.52402	9.57929	9.52074	10.1561	9.49829	9.4838	9.41734	9.13392	9.1592	9.08883	9.02533	9.24695	9.01394	9.20699	9.37466	9.67481
4921501E09Rik	3.0418	3.0418	3.0418	3.0418	3.0418	3.0418	3.0418	3.0418	3.0418	3.0418	3.0418	3.0418	3.0418	3.0418	3.0418	3.31103	3.0418	3.0418	3.0418	3.0418	3.0418	3.0418	3.0418	3.0418	3.0418	3.0418	3.0418	3.0418	3.0418	3.53725	3.0418	3.0418	3.0418	3.0418	3.0418	3.0418	3.0418	3.0418	3.0418	3.0418	3.0418	3.0418	3.0418	3.0418	3.0418	3.0418	3.64758	3.51157	3.0418
4921504A21Rik	3.0418	3.0418	3.0418	3.0418	3.0418	3.0418	3.0418	3.46602	3.0418	3.0418	3.0418	3.0418	3.0418	3.0418	3.39016	3.42199	3.0418	3.32866	3.0418	3.0418	3.0418	3.0418	3.0418	3.41859	3.0418	3.0418	3.0418	3.0418	3.0418	3.53725	3.0418	3.0418	3.0418	3.0418	3.0418	3.47886	3.0418	3.0418	3.99018	3.0418	3.0418	3.89567	3.0418	3.0418	3.0418	3.0418	3.47172	3.0418	3.45704
4921504E06Rik	3.0418	3.0418	3.0418	3.0418	3.0418	3.0418	3.0418	3.0418	3.0418	3.0418	3.0418	3.0418	3.0418	3.0418	3.0418	3.0418	3.0418	3.0418	3.0418	3.0418	3.37344	3.0418	3.0418	3.0418	3.0418	3.0418	3.0418	3.41288	3.0418	3.0418	3.0418	3.0418	3.0418	3.0418	3.0418	3.0418	3.43815	3.0418	3.0418	3.0418	3.0418	3.53954	3.0418	3.0418	3.0418	3.0418	3.0418	3.0418	3.0418
4921506M07Rik	3.48085	3.0418	3.0418	3.0418	3.0418	3.0418	3.0418	3.0418	3.0418	3.0418	3.0418	3.0418	3.0418	3.0418	3.0418	3.0418	3.0418	3.0418	3.0418	3.0418	3.37344	3.0418	3.0418	3.0418	3.0418	3.0418	3.0418	3.0418	3.0418	3.0418	3.0418	3.0418	3.0418	3.0418	3.0418	3.0418	3.0418	3.0418	3.0418	3.53069	3.0418	3.0418	3.45728	3.0418	3.0418	3.0418	3.0418	3.0418	3.0418
4921507L20Rik	4.44734	4.78126	4.46671	4.58802	5.18143	5.3123	5.26408	5.23334	5.08798	5.05775	4.83411	5.13071	5.20911	5.23713	5.5195	5.0361	5.076	4.69724	5.10649	5.01808	5.13258	5.34375	5.17641	4.7182	4.95454	4.94493	4.73189	4.91192	4.7396	4.8495	5.86954	5.13936	5.34332	4.96909	5.22262	5.53072	4.93118	4.56231	4.91694	5.23191	4.89961	5.41271	5.07532	4.52109	4.22417	4.83658	4.92841	5.04038	5.30313
4921507P07Rik	4.25257	4.30674	4.06899	4.74061	5.34778	5.1754	5.09467	4.86838	4.94765	4.74172	4.83411	5.26003	5.07935	4.82314	5.00975	4.8153	5.3395	5.34362	5.43987	4.98464	4.53342	5.048	5.17641	5.4311	5.17053	5.0075	4.99247	4.86861	4.7396	4.90182	5.08591	5.59862	5.3796	5.50463	5.47361	5.79741	5.08136	5.7079	4.97881	5.44482	5.31058	5.75006	5.78472	5.39725	5.36239	5.41364	5.39638	5.75417	5.81981
4921508D12Rik	3.0418	3.0418	3.0418	3.0418	3.0418	3.0418	3.0418	3.0418	3.0418	3.0418	3.0418	3.0418	3.0418	3.0418	3.0418	3.0418	3.0418	3.0418	3.0418	3.0418	3.0418	3.0418	3.0418	3.0418	3.0418	3.0418	3.0418	3.0418	3.0418	3.0418	3.0418	3.0418	3.0418	3.40188	3.0418	3.0418	3.0418	3.0418	3.0418	3.0418	3.0418	3.0418	3.0418	3.0418	3.0418	3.0418	3.0418	3.0418	3.0418
4921509C19Rik	3.0418	3.0418	3.0418	3.0418	3.0418	3.0418	3.0418	3.0418	3.0418	3.0418	3.0418	3.0418	3.0418	3.0418	3.0418	3.0418	3.0418	3.0418	3.0418	3.0418	3.37344	3.0418	3.0418	3.0418	3.0418	3.0418	3.0418	3.0418	3.0418	3.53725	3.0418	3.0418	3.0418	3.0418	3.0418	3.0418	3.0418	3.0418	3.0418	3.0418	3.0418	3.0418	3.0418	3.0418	3.0418	3.0418	3.0418	3.0418	3.0418
4921509O07Rik	3.0418	3.0418	3.0418	3.0418	3.0418	3.0418	3.0418	3.0418	3.0418	3.0418	3.0418	3.0418	3.0418	3.0418	3.0418	3.0418	3.0418	3.0418	3.0418	3.0418	3.0418	3.0418	3.0418	3.0418	3.0418	3.0418	3.0418	3.0418	3.0418	3.0418	3.0418	3.0418	3.0418	3.0418	3.0418	3.0418	3.0418	3.0418	3.0418	3.0418	3.0418	3.0418	3.0418	3.0418	3.0418	3.0418	3.0418	3.0418	3.0418
4921511C10Rik	3.0418	3.0418	3.0418	3.0418	3.0418	3.0418	3.0418	3.0418	3.0418	3.0418	3.0418	3.0418	3.0418	3.0418	3.0418	3.0418	3.0418	3.0418	3.0418	3.0418	3.0418	3.0418	3.0418	3.0418	3.0418	3.0418	3.0418	3.0418	3.0418	3.73911	3.86928	4.1045	4.4834	3.75649	4.31189	4.00486	4.20298	3.90095	4.13069	3.0418	3.0418	3.0418	3.0418	3.0418	3.0418	3.0418	4.4767	3.96943	4.11901
4921511C20Rik	3.0418	3.0418	3.0418	3.0418	3.0418	3.0418	3.0418	3.0418	3.0418	3.0418	3.0418	3.0418	3.0418	3.0418	3.0418	3.0418	3.0418	3.0418	3.46464	3.0418	3.0418	3.0418	3.0418	3.0418	3.0418	3.0418	3.0418	3.30456	3.0418	3.0418	3.0418	3.0418	3.0418	3.0418	3.57419	3.0418	3.0418	3.0418	3.0418	3.0418	3.0418	3.0418	3.0418	3.0418	3.0418	3.0418	3.0418	3.0418	3.0418
4921511H03Rik	3.48085	3.0418	3.0418	3.0418	3.0418	3.0418	3.0418	3.0418	3.0418	3.0418	3.0418	3.37666	3.0418	3.0418	3.0418	3.0418	3.0418	3.32866	3.0418	3.0418	3.0418	3.0418	3.0418	3.0418	3.0418	3.0418	3.0418	3.30456	3.0418	3.0418	3.0418	3.0418	3.0418	3.0418	3.0418	3.0418	3.0418	3.0418	3.0418	3.0418	3.0418	3.0418	3.0418	3.0418	3.0418	3.0418	3.47172	3.0418	3.0418
4921511I17Rik	3.0418	3.0418	3.0418	3.0418	3.0418	3.0418	3.0418	3.0418	3.0418	3.0418	3.0418	3.0418	3.0418	3.0418	3.0418	3.0418	3.0418	3.0418	3.0418	3.0418	3.0418	3.0418	3.0418	3.0418	3.0418	3.0418	3.0418	3.0418	3.0418	3.0418	5.26188	3.45123	3.5401	3.54972	3.95391	3.0418	3.91734	3.54267	3.59585	3.0418	3.0418	3.0418	3.0418	3.0418	3.0418	3.0418	3.47172	3.70328	3.75618
4921511M17Rik	3.0418	3.0418	3.0418	3.0418	3.0418	3.0418	3.0418	3.0418	3.0418	3.0418	3.0418	3.0418	3.0418	3.0418	3.0418	3.0418	3.0418	3.0418	3.0418	3.0418	3.0418	3.0418	3.0418	3.0418	3.0418	3.0418	3.0418	3.0418	3.0418	3.0418	3.0418	3.0418	3.0418	3.0418	3.0418	3.0418	3.0418	3.0418	3.0418	3.0418	3.0418	3.0418	3.0418	3.0418	3.0418	3.0418	3.0418	3.0418	3.0418
4921513I03Rik	3.0418	3.0418	3.0418	3.0418	3.0418	3.0418	3.0418	3.0418	3.0418	3.0418	3.0418	3.0418	3.0418	3.0418	3.0418	3.0418	3.0418	3.0418	3.46464	3.0418	3.0418	3.0418	3.0418	3.0418	3.0418	3.0418	3.0418	3.0418	3.55793	3.0418	3.0418	3.0418	3.0418	3.0418	3.0418	3.0418	3.0418	3.0418	3.43477	3.0418	3.0418	3.0418	3.0418	3.0418	3.0418	3.0418	3.0418	3.0418	3.0418
4921515E04Rik	3.0418	3.0418	3.0418	3.0418	3.0418	3.0418	3.0418	3.0418	3.0418	3.0418	3.0418	3.0418	3.0418	3.0418	3.0418	3.0418	3.0418	3.0418	3.0418	3.0418	3.0418	3.0418	3.0418	3.0418	3.0418	3.0418	3.0418	3.0418	3.0418	3.0418	3.0418	3.0418	3.0418	3.0418	3.0418	3.0418	3.0418	3.0418	3.0418	3.0418	3.0418	3.0418	3.0418	3.0418	3.0418	3.0418	3.0418	3.0418	3.0418
4921517D22Rik	3.0418	3.0418	3.0418	3.0418	3.40646	3.73856	3.74903	3.0418	3.98985	4.17438	4.18146	3.37666	3.37071	3.85862	3.73356	4.06447	3.67382	3.93604	3.46464	3.0418	4.16461	3.86859	3.53713	3.69079	3.0418	3.44142	3.72133	3.73136	3.0418	4.12918	3.0418	3.85269	3.0418	3.66229	3.79057	4.00486	3.72407	3.0418	3.59585	4.52855	3.0418	3.89567	3.86444	3.92015	3.70192	3.43106	3.64758	3.51157	3.86398
4921524J17Rik	8.40221	8.25913	8.29495	8.24915	7.35897	7.56183	7.46427	7.4238	7.26917	7.33071	7.61851	7.43046	7.29104	7.63264	7.11406	7.20408	7.64585	7.57649	7.24217	7.44998	6.89545	6.94868	7.506	7.2549	7.48082	7.64314	7.06959	7.34029	7.79982	7.35028	7.75906	7.58793	7.31219	7.57684	7.6593	7.5387	7.28668	7.59681	7.83849	7.43179	7.28292	7.47132	7.06882	7.61146	7.63786	7.46377	7.39084	7.33447	7.98017
4921524L21Rik	3.0418	3.0418	3.0418	3.0418	3.0418	3.0418	3.0418	3.0418	3.0418	3.0418	3.0418	3.0418	3.0418	3.0418	3.0418	3.0418	3.0418	3.0418	3.0418	3.0418	3.0418	3.0418	3.0418	3.0418	3.0418	3.0418	3.0418	3.0418	3.0418	3.0418	3.0418	3.0418	3.0418	3.0418	3.0418	3.0418	3.0418	3.0418	3.0418	3.0418	3.0418	3.0418	3.62738	3.0418	3.0418	3.0418	3.0418	3.0418	3.0418
4921525O09Rik	4.55992	4.54264	4.90086	4.74061	5.06554	5.1754	6.60795	6.49678	6.10713	6.00446	4.83411	4.82467	5.764	5.92518	5.40501	5.65833	5.77733	6.27913	5.16828	5.31188	5.90499	5.98747	4.61378	5.21903	5.98833	5.85557	5.48318	5.76537	4.80154	5.17685	3.86928	4.77318	4.68608	5.01912	4.49409	4.17335	4.86568	4.0292	4.41107	5.44482	4.83742	5.26555	5.19479	4.72811	5.31895	4.96275	3.98954	4.47433	5.92339
4921529L05Rik	3.0418	3.0418	3.0418	3.0418	3.0418	3.0418	3.0418	3.0418	3.0418	3.0418	3.0418	3.0418	3.0418	3.0418	3.0418	3.0418	3.0418	3.0418	3.0418	3.0418	3.0418	3.0418	3.0418	3.0418	3.0418	3.0418	3.0418	3.41288	3.0418	3.0418	3.63087	3.0418	3.0418	3.0418	3.0418	3.0418	3.0418	3.0418	3.0418	3.0418	3.0418	3.0418	3.0418	3.0418	3.0418	3.0418	3.0418	3.0418	3.0418
4921530L21Rik	3.0418	3.0418	3.0418	3.0418	3.0418	3.0418	3.0418	3.0418	3.0418	3.0418	3.0418	3.0418	3.0418	3.0418	3.0418	3.0418	3.0418	3.0418	3.46464	3.45895	3.37344	3.35796	3.0418	3.0418	3.0418	3.0418	3.34794	3.30456	3.0418	3.0418	3.0418	3.0418	3.0418	3.0418	3.0418	3.0418	3.0418	3.0418	3.0418	3.53069	3.42345	3.0418	3.0418	3.55409	3.0418	3.0418	3.0418	3.0418	3.0418
4921531C22Rik	5.41095	4.9429	5.35537	5.39434	4.52663	4.9989	4.60147	4.74709	4.83102	4.9372	5.10176	4.79963	4.63962	4.96552	4.93842	4.87813	4.89296	5.20329	5.10649	5.01808	5.49589	5.28356	4.39908	4.96567	5.05507	4.94493	4.91799	4.88322	4.86047	5.09159	5.26188	5.01819	5.57878	5.30397	5.54781	5.19807	5.40567	4.97047	5.09415	5.37757	5.81823	5.66602	5.803	5.32038	5.54207	5.81458	5.44785	5.48898	5.47521
4921531P14Rik	3.0418	3.0418	3.0418	3.0418	3.0418	3.0418	3.0418	3.0418	3.0418	3.0418	3.0418	3.0418	3.0418	3.0418	3.0418	3.0418	3.0418	3.0418	3.0418	3.0418	3.0418	3.0418	3.0418	3.0418	3.0418	3.0418	3.0418	3.0418	3.0418	3.53725	3.0418	3.0418	3.0418	3.0418	3.0418	3.0418	3.0418	3.0418	3.0418	3.0418	3.0418	3.0418	3.0418	3.0418	3.0418	3.0418	3.0418	3.0418	3.0418
4921533I20Rik	3.0418	3.0418	3.0418	3.0418	3.0418	3.0418	3.54436	3.63962	3.47186	3.0418	3.0418	3.0418	3.0418	3.62318	3.0418	3.0418	3.0418	3.32866	3.0418	3.0418	3.50979	3.48803	3.0418	3.0418	3.0418	3.60516	3.34794	3.41288	3.76793	3.89182	3.63087	3.45123	3.0418	3.40188	3.0418	3.0418	3.43815	3.0418	3.0418	3.0418	3.0418	3.7423	3.0418	3.55409	3.0418	3.43106	3.0418	3.0418	3.0418
4921534H16Rik	3.0418	3.0418	3.0418	3.0418	3.0418	3.0418	3.0418	3.0418	3.0418	3.0418	3.0418	3.0418	3.0418	3.0418	3.0418	3.0418	3.0418	3.0418	3.0418	3.0418	3.37344	3.0418	3.0418	3.0418	3.0418	3.0418	3.34794	3.30456	3.0418	3.0418	3.0418	3.0418	3.0418	3.0418	3.0418	3.0418	3.0418	3.0418	3.0418	3.0418	3.42345	3.0418	3.75658	3.0418	3.0418	3.0418	3.0418	3.0418	3.0418
4921536K21Rik	4.00912	3.99755	3.0418	3.92718	4.05501	3.81897	3.39806	3.97733	3.0418	3.34126	3.98009	3.78404	3.90114	4.24802	3.0418	3.0418	3.0418	3.53704	3.46464	3.0418	3.0418	3.0418	3.0418	3.57317	3.0418	3.60516	3.34794	3.0418	3.55793	4.12918	3.0418	4.02871	3.74308	4.50934	4.40689	4.74932	3.91734	4.0292	4.06324	4.21267	4.70258	3.0418	3.86444	4.05106	4.33032	4.29681	4.4767	4.40595	3.0418
4921539E11Rik	3.0418	3.0418	3.0418	3.0418	3.0418	3.0418	3.0418	3.0418	3.0418	3.0418	3.0418	3.0418	3.0418	3.0418	3.0418	3.0418	3.0418	3.0418	3.0418	3.0418	3.0418	3.0418	3.0418	3.0418	3.0418	3.0418	3.0418	3.0418	3.0418	3.0418	3.0418	3.0418	3.0418	3.0418	3.0418	3.0418	3.43815	3.0418	3.0418	3.53069	3.0418	3.0418	3.0418	3.0418	3.42512	3.0418	3.0418	3.70328	3.0418
4922502D21Rik	4.00912	3.78741	4.32591	4.02797	3.55615	3.73856	3.74903	3.77143	3.0418	3.0418	3.0418	3.0418	3.0418	3.0418	3.0418	3.0418	3.7697	3.84412	3.0418	3.0418	3.37344	3.35796	3.0418	3.0418	3.0418	3.72963	3.34794	3.0418	3.0418	3.53725	3.0418	3.85269	4.23421	4.04269	4.2071	3.65758	3.0418	3.90095	3.91006	3.0418	3.79861	3.53954	3.0418	3.55409	3.58233	3.0418	3.0418	3.51157	4.04227
4922502H24Rik	3.0418	3.0418	3.0418	3.0418	3.0418	3.0418	3.0418	3.0418	3.0418	3.0418	3.0418	3.0418	3.0418	3.0418	3.0418	3.0418	3.0418	3.0418	3.0418	3.0418	3.0418	3.0418	3.0418	3.0418	3.0418	3.0418	3.0418	3.0418	3.0418	3.0418	3.0418	3.0418	3.0418	3.0418	3.0418	3.0418	3.0418	3.0418	3.0418	3.0418	3.0418	3.0418	3.0418	3.0418	3.0418	3.0418	3.0418	3.0418	3.0418
4922502N22Rik	3.0418	3.0418	3.0418	3.0418	3.0418	3.0418	3.0418	3.0418	3.0418	3.34126	3.0418	3.0418	3.0418	3.0418	3.0418	3.0418	3.0418	3.0418	3.0418	3.0418	3.0418	3.58724	3.0418	3.0418	3.0418	3.44142	3.34794	3.0418	3.0418	3.0418	3.0418	3.0418	3.0418	3.0418	3.0418	3.0418	3.0418	3.0418	3.0418	3.72997	3.0418	3.0418	3.45728	3.0418	3.0418	3.0418	3.0418	3.0418	3.0418
4930401C15Rik	3.0418	3.0418	3.0418	3.0418	3.0418	3.0418	3.0418	3.0418	3.0418	3.0418	3.0418	3.0418	3.0418	3.0418	3.0418	3.0418	3.0418	3.0418	3.0418	3.0418	3.0418	3.0418	3.0418	3.0418	3.0418	3.0418	3.0418	3.0418	3.0418	3.0418	3.0418	3.0418	3.0418	3.0418	3.0418	3.0418	3.0418	3.0418	3.0418	3.0418	3.0418	3.0418	3.0418	3.0418	3.0418	3.0418	3.47172	3.0418	3.0418
4930401O10Rik	3.0418	3.0418	3.0418	3.0418	3.0418	3.0418	3.0418	3.0418	3.0418	3.0418	3.0418	3.0418	3.0418	3.0418	3.0418	3.0418	3.0418	3.0418	3.0418	3.0418	3.0418	3.0418	3.0418	3.0418	3.0418	3.0418	3.0418	3.0418	3.0418	3.0418	3.0418	3.0418	3.0418	3.0418	3.0418	3.0418	3.0418	3.0418	3.0418	3.0418	3.0418	3.0418	3.0418	3.0418	3.0418	3.0418	3.0418	3.51157	3.0418
4930401O12Rik	3.0418	3.0418	3.0418	3.0418	3.0418	3.0418	3.0418	3.0418	3.0418	3.0418	3.0418	3.0418	3.0418	3.0418	3.0418	3.0418	3.0418	3.0418	3.0418	3.0418	3.0418	3.0418	3.0418	3.0418	3.0418	3.0418	3.0418	3.0418	3.0418	3.0418	3.0418	3.0418	3.0418	3.0418	3.0418	3.0418	3.0418	3.0418	3.0418	3.0418	3.0418	3.0418	3.0418	3.0418	3.0418	3.0418	3.0418	3.0418	3.0418
4930402F06Rik	3.0418	3.65281	3.0418	3.0418	3.0418	3.39271	3.0418	3.0418	3.0418	3.0418	3.0418	3.0418	3.0418	3.45428	3.39016	3.0418	3.0418	3.32866	3.0418	3.0418	3.0418	3.0418	3.0418	3.41859	3.40429	3.44142	3.0418	3.30456	3.0418	3.0418	3.0418	3.0418	3.5401	3.0418	3.57419	3.0418	3.43815	3.0418	3.0418	3.0418	3.42345	3.7423	3.75658	3.0418	3.70192	3.0418	3.47172	3.0418	3.0418
4930402F11Rik	3.0418	3.0418	3.0418	3.0418	3.0418	3.0418	3.0418	3.0418	3.0418	3.0418	3.0418	3.0418	3.0418	3.0418	3.0418	3.0418	3.0418	3.0418	3.0418	3.0418	3.0418	3.0418	3.0418	3.0418	3.0418	3.0418	3.0418	3.0418	3.0418	3.0418	3.0418	3.0418	3.0418	3.0418	3.0418	3.0418	3.43815	3.0418	3.0418	3.0418	3.0418	3.0418	3.0418	3.0418	3.0418	3.0418	3.0418	3.0418	3.0418
4930402H24Rik	6.97546	7.11819	6.73331	7.07006	7.08227	7.06037	7.03934	7.11501	7.80772	7.72062	7.56444	7.57937	7.22189	7.44297	7.84495	7.93574	7.54589	7.14725	7.19369	6.98716	8.44846	8.46835	7.35832	7.86835	7.34796	7.51836	7.82077	7.73723	7.9254	7.69627	8.32077	7.80624	8.07803	8.04008	8.18352	7.7271	7.14038	7.58176	7.63458	7.41571	7.29898	7.65292	7.4621	8.03785	7.83576	7.65758	7.3457	7.58718	6.5555
4930402K13Rik	3.0418	3.0418	3.0418	3.0418	3.0418	3.0418	3.0418	3.0418	3.0418	3.0418	3.0418	3.0418	3.0418	3.0418	3.0418	3.0418	3.0418	3.0418	3.0418	3.0418	3.0418	3.0418	3.0418	3.0418	3.0418	3.0418	3.0418	3.0418	3.0418	3.0418	3.0418	3.0418	3.0418	3.0418	3.0418	3.0418	3.0418	3.0418	3.0418	3.0418	3.0418	3.0418	3.0418	3.0418	3.0418	3.0418	3.0418	3.0418	3.0418
4930404A05Rik	3.0418	3.0418	3.0418	3.0418	3.0418	3.0418	3.0418	3.0418	3.0418	3.0418	3.0418	3.0418	3.0418	3.0418	3.0418	3.0418	3.0418	3.0418	3.0418	3.0418	3.0418	3.0418	3.0418	3.0418	3.0418	3.0418	3.0418	3.0418	3.0418	3.0418	3.0418	3.0418	3.0418	3.0418	3.0418	3.0418	3.0418	3.0418	3.0418	3.0418	3.0418	3.0418	3.0418	3.0418	3.0418	3.0418	3.0418	3.0418	3.0418
4930404A10Rik	3.0418	3.0418	3.0418	3.0418	3.0418	3.0418	3.0418	3.0418	3.0418	3.0418	3.0418	3.0418	3.0418	3.45428	3.0418	3.0418	3.0418	3.0418	3.0418	3.45895	3.37344	3.0418	3.0418	3.0418	3.0418	3.0418	3.0418	3.0418	3.0418	3.0418	3.0418	3.0418	3.0418	3.0418	3.0418	3.0418	3.0418	3.0418	3.0418	3.0418	3.0418	3.0418	3.62738	3.0418	3.0418	3.0418	3.47172	3.0418	3.0418
4930404H11Rik	3.0418	3.0418	3.0418	3.0418	3.0418	3.0418	3.0418	3.0418	3.0418	3.0418	3.0418	3.0418	3.0418	3.0418	3.0418	3.0418	3.0418	3.0418	3.0418	3.0418	3.0418	3.0418	3.0418	3.0418	3.0418	3.0418	3.0418	3.0418	3.0418	3.0418	3.0418	3.0418	3.0418	3.0418	3.0418	3.0418	3.0418	3.0418	3.0418	3.0418	3.0418	3.0418	3.0418	3.0418	3.0418	3.0418	3.0418	3.0418	3.0418
4930404I05Rik	5.46404	5.41335	4.94556	4.83241	5.2463	5.3123	5.20311	5.34411	5.15275	5.19771	4.83411	5.05056	5.13657	5.36667	5.24173	5.16442	5.10011	5.01522	5.10649	5.17327	5.32665	5.13712	5.09117	5.35029	5.27656	4.94493	4.83877	5.04633	5.16537	5.25686	7.17069	4.986	5.41491	5.1362	5.12707	4.87751	5.53225	4.62995	5.66654	5.02352	5.09573	5.14328	4.53429	4.72811	5.05038	5.23215	4.92841	5.08093	5.1354
4930404N11Rik	6.78651	6.75558	6.47338	6.80565	6.74612	6.96709	6.71648	6.93144	6.88713	6.8925	6.33217	6.57791	6.90094	6.49625	6.79321	6.81386	6.60198	6.63057	6.46559	6.7556	6.90605	7.27988	6.58725	6.2484	6.58082	6.45204	6.81078	6.71214	5.25279	6.61717	5.3673	6.41136	5.44932	5.89918	5.26789	5.60243	5.24104	5.62001	5.66654	6.18637	6.15308	6.26619	5.89098	6.54527	6.70215	6.57558	5.47287	6.01687	6.26159
4930405A10Rik	3.0418	3.0418	3.0418	3.0418	3.0418	3.0418	3.0418	3.0418	3.0418	3.0418	3.0418	3.0418	3.0418	3.0418	3.0418	3.0418	3.0418	3.0418	3.0418	3.0418	3.0418	3.0418	3.0418	3.0418	3.0418	3.0418	3.0418	3.0418	3.0418	3.0418	3.0418	3.0418	3.0418	3.0418	3.0418	3.0418	3.0418	3.0418	3.0418	3.0418	3.0418	3.0418	3.0418	3.0418	3.0418	3.0418	3.0418	3.0418	3.0418
4930405A21Rik	4.25257	3.99755	4.53078	4.78738	3.67012	4.2268	3.97064	3.77143	4.11722	3.9278	3.98009	3.97471	3.90114	4.1825	4.06766	4.09661	4.22803	4.01839	3.63768	3.75942	4.16461	4.23447	3.89162	4.02253	3.98642	4.07992	3.72133	3.86273	4.60506	4.4757	4.43946	4.77318	5.0568	4.74602	4.78799	4.24734	4.20298	4.24011	4.59148	4.52855	4.37401	4.32274	4.25635	4.90427	4.51478	4.49214	4.4767	4.59954	4.71434
4930405D11Rik	3.0418	3.0418	3.0418	3.0418	3.0418	3.0418	3.0418	3.0418	3.0418	3.0418	3.0418	3.0418	3.0418	3.0418	3.0418	3.0418	3.0418	3.0418	3.0418	3.0418	3.0418	3.0418	3.0418	3.0418	3.0418	3.0418	3.0418	3.0418	3.0418	3.0418	3.0418	3.0418	3.0418	3.0418	3.0418	3.0418	3.0418	3.0418	3.0418	3.53069	3.0418	3.0418	3.0418	3.0418	3.0418	3.0418	3.0418	3.0418	3.0418
4930405J17Rik	3.0418	3.0418	3.0418	3.67269	3.0418	3.39271	3.54436	3.0418	3.34646	3.34126	3.71101	3.0418	3.37071	3.7515	3.53327	3.88245	3.67382	3.0418	3.46464	3.0418	3.37344	3.35796	3.0418	3.41859	3.40429	3.0418	3.47394	3.41288	3.0418	3.0418	3.0418	3.0418	3.5401	3.0418	3.57419	3.65758	3.43815	3.0418	3.91006	3.53069	3.0418	3.0418	3.45728	3.0418	3.0418	3.0418	3.64758	3.0418	3.0418
4930405L22Rik	3.0418	3.0418	3.0418	3.0418	3.0418	3.0418	3.0418	3.0418	3.0418	3.0418	3.0418	3.0418	3.0418	3.0418	3.0418	3.0418	3.0418	3.0418	3.0418	3.0418	3.0418	3.0418	3.0418	3.0418	3.0418	3.0418	3.0418	3.0418	3.0418	3.0418	3.0418	3.0418	3.0418	3.0418	3.0418	3.0418	3.0418	3.0418	3.0418	3.0418	3.0418	3.0418	3.0418	3.0418	3.0418	3.0418	3.0418	3.0418	3.0418
4930406D18Rik	3.0418	3.0418	3.0418	3.48967	3.0418	3.0418	3.0418	3.0418	3.0418	3.0418	3.0418	3.0418	3.0418	3.0418	3.0418	3.0418	3.0418	3.0418	3.0418	3.0418	3.0418	3.0418	3.0418	3.0418	3.0418	3.0418	3.34794	3.0418	3.0418	3.0418	3.0418	3.0418	3.0418	3.0418	3.0418	3.0418	3.0418	3.0418	3.0418	3.88077	3.0418	3.0418	3.0418	3.0418	3.0418	3.0418	3.0418	3.0418	3.0418
4930407I10Rik	3.0418	3.47545	3.0418	3.0418	3.0418	3.53686	3.39806	3.0418	3.34646	3.0418	3.0418	3.0418	3.37071	3.7515	3.39016	3.0418	3.0418	3.0418	3.0418	3.45895	3.0418	3.0418	3.0418	3.0418	3.0418	3.0418	3.78484	3.0418	3.0418	3.0418	3.0418	3.0418	3.0418	3.0418	3.0418	3.0418	3.0418	3.0418	3.0418	3.88077	3.42345	3.0418	3.95855	4.16478	3.0418	3.0418	3.64758	3.84851	3.0418
4930412B13Rik	3.0418	3.0418	3.0418	3.0418	3.0418	3.0418	3.0418	3.0418	3.0418	3.0418	3.0418	3.0418	3.0418	3.0418	3.0418	3.0418	3.0418	3.0418	3.0418	3.0418	3.0418	3.0418	3.0418	3.0418	3.0418	3.0418	3.34794	3.30456	3.0418	3.0418	3.0418	3.0418	3.0418	3.0418	3.0418	3.0418	3.0418	3.0418	3.0418	3.0418	3.0418	3.0418	3.0418	3.0418	3.58233	3.0418	3.0418	3.51157	3.0418
4930412C18Rik	3.0418	3.47545	3.0418	3.0418	3.0418	3.0418	3.0418	3.0418	3.0418	3.0418	3.0418	3.0418	3.0418	3.0418	3.0418	3.0418	3.0418	3.0418	3.46464	3.0418	3.50979	3.0418	3.0418	3.0418	3.0418	3.0418	3.34794	3.0418	3.55793	3.0418	3.63087	3.45123	3.0418	3.40188	3.0418	3.0418	3.91734	3.0418	3.43477	4.00621	3.0418	3.7423	3.62738	3.0418	3.0418	3.0418	3.0418	3.0418	3.0418
4930412D23Rik	3.0418	3.0418	3.0418	3.0418	3.0418	3.0418	3.0418	3.0418	3.0418	3.0418	3.0418	3.0418	3.0418	3.0418	3.0418	3.0418	3.0418	3.0418	3.0418	3.0418	3.0418	3.0418	3.0418	3.0418	3.0418	3.0418	3.0418	3.0418	3.0418	3.0418	3.0418	3.0418	3.0418	3.0418	3.0418	3.0418	3.0418	3.0418	3.0418	3.0418	3.0418	3.0418	3.0418	3.0418	3.0418	3.0418	3.0418	3.0418	3.0418
4930412O13Rik	3.0418	3.65281	3.0418	3.67269	3.84881	4.01804	4.09008	4.14142	3.64778	3.70672	3.71101	4.21894	5.359	5.39113	3.53327	3.74806	4.67794	4.96758	6.8623	7.01071	3.8455	3.92401	4.31686	4.08751	5.51809	4.94493	3.78484	3.49566	4.53141	3.53725	4.04864	4.1045	4.23421	4.10089	4.31189	4.31616	3.43815	4.33038	3.91006	4.52855	4.66634	4.13403	4.9778	4.16478	4.03899	4.05393	3.98954	4.76498	5.47521
4930413E15Rik	3.0418	3.0418	3.0418	3.0418	3.0418	3.0418	3.0418	3.0418	3.0418	3.0418	3.0418	3.0418	3.0418	3.0418	3.0418	3.0418	3.0418	3.0418	3.0418	3.0418	3.0418	3.0418	3.0418	3.0418	3.0418	3.0418	3.0418	3.0418	3.0418	3.0418	3.0418	3.0418	3.0418	3.0418	3.0418	3.0418	3.0418	3.0418	3.0418	3.0418	3.0418	3.0418	3.0418	3.0418	3.0418	3.0418	3.0418	3.0418	3.0418
4930413F20Rik	3.48085	3.0418	3.0418	3.0418	3.0418	3.0418	3.0418	3.0418	3.0418	3.0418	3.0418	3.0418	3.0418	3.0418	3.0418	3.0418	3.0418	3.0418	3.0418	3.0418	3.37344	3.35796	3.0418	3.41859	3.40429	3.0418	3.34794	3.0418	3.0418	3.0418	3.0418	3.0418	3.0418	3.0418	3.0418	3.0418	3.0418	3.0418	3.0418	3.0418	3.0418	3.0418	3.62738	3.55409	3.0418	3.0418	3.0418	3.51157	3.0418
4930413G21Rik	7.96494	7.91342	7.8425	7.96004	7.70881	7.5693	7.20698	7.09995	7.4599	7.70837	7.94894	7.70197	7.93855	7.13647	7.57936	7.12874	7.62249	7.8236	7.48008	7.5603	8.09164	8.40043	6.86869	6.93215	6.94934	7.50324	7.72235	6.63819	6.74759	7.57514	8.41799	7.38343	7.39125	7.20965	7.45955	7.32869	7.06799	7.26103	7.25273	7.77826	7.29898	8.14734	6.59875	7.70163	7.67968	7.70847	7.50666	7.85796	6.74415
4930413M19Rik	3.0418	3.0418	3.0418	3.0418	3.0418	3.0418	3.0418	3.0418	3.0418	3.0418	3.0418	3.0418	3.0418	3.0418	3.0418	3.0418	3.0418	3.0418	3.0418	3.0418	3.0418	3.0418	3.0418	3.0418	3.0418	3.0418	3.0418	3.0418	3.0418	3.0418	3.0418	3.0418	3.0418	3.0418	3.0418	3.0418	3.0418	3.0418	3.0418	3.0418	3.0418	3.0418	3.0418	3.0418	3.0418	3.0418	3.0418	3.0418	3.0418
4930414L22Rik	6.64876	6.97881	6.9733	7.0084	6.39968	6.0632	6.08671	5.84819	5.98452	5.89446	6.04334	5.97911	6.31601	6.08016	5.81445	5.91898	6.34839	6.22916	6.2506	6.37336	6.21188	6.16814	5.81872	5.99986	6.14798	6.25984	6.11818	5.62455	5.20981	5.81924	5.93792	5.37666	5.66837	5.48758	5.71731	6.0208	5.72004	5.7079	5.73646	6.44794	5.94823	5.82927	5.70904	5.94342	6.1512	6.31386	6.27573	6.13172	5.10522
4930414N06Rik	3.79656	3.65281	3.844	3.67269	3.84881	3.64666	3.97064	3.77143	3.71809	3.87854	3.98009	3.70711	3.77107	3.85862	3.64229	3.88245	3.7697	3.61273	3.97436	3.86768	3.70079	4.02447	3.53713	3.41859	3.84411	3.60516	3.57008	3.73136	3.0418	3.0418	4.04864	3.45123	3.74308	3.54972	3.79057	3.0418	3.82725	3.54267	4.06324	3.53069	3.42345	3.7423	3.62738	3.76258	3.0418	3.81346	3.47172	3.84851	3.45704
4930415F15Rik	4.09768	3.78741	3.69955	4.02797	3.84881	3.73856	3.90379	3.97733	4.03441	4.17438	3.71101	4.08052	4.11044	4.11213	4.06766	3.92228	4.49602	4.39885	4.13797	4.19485	4.07089	4.1561	3.73895	4.14808	4.1627	4.00575	3.84295	4.33927	3.55793	3.53725	3.63087	3.61891	3.5401	4.04269	4.2071	3.90628	4.07172	3.74667	3.91006	4.82804	4.27351	4.23294	4.11961	3.76258	3.70192	4.24162	4.07645	4.40595	4.25569
4930415L06Rik	3.0418	3.0418	3.0418	3.0418	3.0418	3.0418	3.0418	3.0418	3.0418	3.0418	3.0418	3.0418	3.0418	3.45428	3.0418	3.0418	3.0418	3.0418	3.46464	3.0418	3.0418	3.0418	3.0418	3.0418	3.0418	3.0418	3.0418	3.0418	3.0418	3.0418	3.0418	3.0418	3.0418	3.0418	3.0418	3.0418	3.0418	3.0418	3.0418	3.0418	3.0418	3.0418	3.0418	3.0418	3.0418	3.0418	3.0418	3.0418	3.0418
4930415O20Rik	3.91013	3.47545	3.5089	3.67269	3.0418	3.39271	3.0418	3.63962	3.34646	3.0418	3.0418	3.61924	3.0418	3.7515	3.39016	3.42199	3.0418	3.32866	3.76908	3.75942	3.70079	3.35796	3.53713	3.57317	3.55311	3.60516	3.57008	3.62615	3.55793	3.0418	3.86928	3.0418	3.5401	3.40188	3.0418	3.65758	3.60058	3.74667	3.71833	3.72997	3.69906	3.89567	4.04282	3.0418	3.70192	3.59066	3.98954	3.70328	3.0418
4930417O13Rik	8.13251	8.0986	8.45037	8.40037	6.73895	6.97275	6.15048	5.84819	6.10713	5.92063	6.57183	6.67615	7.18816	7.2632	5.78893	5.9938	7.67643	7.23773	6.42995	6.17762	7.40875	7.13205	6.41411	7.1723	6.93084	6.69443	5.43254	5.21349	6.9977	6.43133	9.69592	7.70354	7.88543	8.27213	8.21141	6.91898	8.25661	7.04724	7.26435	6.87156	6.49979	7.15698	7.19648	7.38515	6.99588	7.67474	6.93947	7.27812	7.35532
4930417O22Rik	3.0418	3.0418	3.0418	3.0418	3.0418	3.0418	3.0418	3.0418	3.0418	3.0418	3.0418	3.0418	3.0418	3.0418	3.0418	3.0418	3.0418	3.0418	3.0418	3.0418	3.0418	3.0418	3.0418	3.0418	3.0418	3.0418	3.0418	3.0418	3.0418	3.0418	3.0418	3.0418	3.0418	3.0418	3.0418	3.0418	3.0418	3.0418	3.0418	3.0418	3.0418	3.0418	3.0418	3.76258	3.0418	3.0418	3.0418	3.0418	3.0418
4930419G24Rik	3.0418	3.0418	3.0418	3.0418	3.0418	3.0418	3.0418	3.0418	3.0418	3.0418	3.0418	3.0418	3.0418	3.0418	3.0418	3.0418	3.0418	3.0418	3.0418	3.0418	3.0418	3.35796	3.0418	3.0418	3.0418	3.0418	3.0418	3.41288	3.0418	3.0418	3.0418	3.0418	3.0418	3.0418	3.0418	3.0418	3.0418	3.0418	3.0418	3.53069	3.0418	3.53954	3.45728	3.0418	3.0418	3.0418	3.0418	3.0418	3.0418
4930423M02Rik	3.0418	3.0418	3.0418	3.0418	3.0418	3.0418	3.0418	3.0418	3.0418	3.0418	3.0418	3.0418	3.0418	3.0418	3.0418	3.0418	3.0418	3.0418	3.0418	3.0418	3.0418	3.0418	3.0418	3.0418	3.0418	3.0418	3.0418	3.0418	3.0418	3.0418	3.0418	3.0418	3.0418	3.0418	3.0418	3.0418	3.0418	3.0418	3.0418	3.0418	3.0418	3.0418	3.45728	3.0418	3.0418	3.0418	3.0418	3.0418	3.0418
4930425K10Rik	3.0418	3.0418	3.0418	3.0418	3.0418	3.0418	3.0418	3.0418	3.0418	3.0418	3.0418	3.0418	3.0418	3.0418	3.0418	3.0418	3.0418	3.0418	3.0418	3.0418	3.0418	3.0418	3.0418	3.0418	3.0418	3.0418	3.0418	3.30456	3.0418	3.0418	3.0418	3.0418	3.0418	3.0418	3.0418	3.0418	3.0418	3.0418	3.0418	3.0418	3.0418	3.0418	3.45728	3.0418	3.42512	3.0418	3.0418	3.0418	3.0418
4930425O10Rik	3.0418	3.0418	3.0418	3.0418	3.0418	3.0418	3.0418	3.0418	3.0418	3.0418	3.0418	3.0418	3.0418	3.0418	3.0418	3.0418	3.0418	3.0418	3.0418	3.0418	3.0418	3.0418	3.0418	3.0418	3.0418	3.0418	3.0418	3.0418	3.0418	3.0418	3.0418	3.45123	3.0418	3.0418	3.0418	3.0418	3.0418	3.0418	3.0418	3.0418	3.0418	3.0418	3.0418	3.0418	3.0418	3.0418	3.0418	3.0418	3.0418
4930426D05Rik	3.0418	3.0418	3.0418	3.0418	3.0418	3.0418	3.0418	3.0418	3.0418	3.0418	3.0418	3.0418	3.0418	3.0418	3.0418	3.0418	3.0418	3.0418	3.0418	3.0418	3.0418	3.0418	3.0418	3.0418	3.0418	3.0418	3.0418	3.0418	3.0418	3.0418	3.0418	3.0418	3.5401	3.40188	3.0418	3.0418	3.0418	3.0418	3.0418	3.72997	3.0418	3.0418	3.0418	3.0418	3.0418	3.0418	3.0418	3.0418	3.0418
4930426L09Rik	4.09768	3.78741	3.69955	3.92718	4.96461	4.9989	4.457	4.06321	4.74658	4.67632	4.83411	4.72124	4.39061	4.36738	4.80962	4.73191	5.2991	5.18975	4.45466	3.96214	5.0742	5.11979	4.31686	4.44882	4.21464	4.21212	4.79715	4.33927	4.27493	4.2277	6.0955	4.51415	4.62243	4.20719	5.07651	4.38063	3.43815	4.97047	4.71012	4.30112	4.8051	4.23294	4.9778	4.52109	4.63533	4.69583	4.85071	4.53868	5.19374
4930427A07Rik	9.0986	9.12698	8.93422	8.82889	9.75802	9.74902	9.65967	9.61826	9.77776	9.8772	9.29437	9.84227	9.76084	9.5437	9.88958	9.8411	9.62357	9.59417	9.59307	9.53716	10.2513	10.227	9.23973	9.73837	9.54096	9.57657	9.96329	9.84728	8.86051	9.44512	6.80635	9.33544	9.31177	9.40285	9.10183	9.0238	8.94524	8.90248	8.86525	9.47462	9.22619	9.27441	9.17548	9.3069	9.50794	9.47906	8.98999	9.17143	9.29084
4930428D18Rik	3.0418	3.0418	3.0418	3.0418	3.0418	3.0418	3.0418	3.0418	3.0418	3.0418	3.0418	3.0418	3.0418	3.0418	3.0418	3.0418	3.0418	3.0418	3.0418	3.0418	3.0418	3.0418	3.0418	3.0418	3.0418	3.0418	3.0418	3.0418	3.0418	3.0418	3.0418	3.0418	3.0418	3.0418	3.0418	3.0418	3.43815	3.0418	3.0418	3.0418	3.0418	3.0418	3.0418	3.0418	3.0418	3.0418	3.0418	3.0418	3.0418
4930428E07Rik	3.0418	3.0418	3.0418	3.0418	3.0418	3.0418	3.0418	3.0418	3.0418	3.0418	3.0418	3.0418	3.0418	3.0418	3.0418	3.0418	3.0418	3.0418	3.0418	3.0418	3.0418	3.0418	3.0418	3.0418	3.0418	3.0418	3.0418	3.0418	3.0418	3.0418	3.0418	3.0418	3.0418	3.0418	3.0418	3.0418	3.0418	3.0418	3.0418	3.0418	3.0418	3.0418	3.0418	3.0418	3.0418	3.0418	3.0418	3.0418	3.0418
4930428G15Rik	3.0418	3.0418	3.0418	3.0418	3.0418	3.0418	3.0418	3.0418	3.0418	3.0418	3.0418	3.0418	3.0418	3.0418	3.0418	3.0418	3.0418	3.0418	3.0418	3.0418	3.0418	3.0418	3.0418	3.0418	3.0418	3.0418	3.0418	3.0418	3.0418	3.0418	3.0418	3.0418	3.0418	3.0418	3.0418	3.0418	3.0418	3.0418	3.0418	3.0418	3.0418	3.0418	3.0418	3.0418	3.0418	3.0418	3.0418	3.0418	3.0418
4930428O21Rik	4.09768	3.47545	3.96428	3.48967	3.76545	3.89115	4.33451	3.97733	3.0418	3.46455	3.0418	3.70711	4.24037	4.03583	3.0418	3.0418	3.0418	3.61273	3.46464	3.0418	3.61373	3.6704	3.89162	4.20494	4.35579	4.07992	3.0418	3.30456	3.0418	3.89182	4.19703	4.02871	4.02426	4.34755	4.31189	4.00486	4.13968	3.90095	3.91006	4.00621	4.16174	3.7423	4.19043	3.76258	3.96754	4.18314	3.89244	3.51157	3.62704
4930429B21Rik	5.56433	4.78126	5.81228	5.96782	6.21471	6.13634	5.81111	5.95406	4.89071	5.00749	6.19516	6.24294	6.16675	6.08016	5.07728	5.07596	5.21438	5.31919	4.50792	4.261	4.16461	4.49841	6.27341	5.39131	6.10419	6.50394	5.14559	5.12064	4.80154	5.04675	4.32541	4.986	5.5156	5.1362	5.39509	6.58089	5.85371	6.52248	6.92665	5.59958	5.90624	5.77697	5.66958	4.90427	5.71721	5.71636	6.45773	6.11322	5.68825
4930429D17Rik	3.0418	3.0418	3.0418	3.0418	3.0418	3.0418	3.0418	3.0418	3.0418	3.0418	3.0418	3.0418	3.0418	3.0418	3.0418	3.0418	3.0418	3.0418	3.0418	3.0418	3.0418	3.0418	3.0418	3.0418	3.0418	3.0418	3.0418	3.0418	3.76793	3.89182	3.0418	3.0418	3.5401	3.54972	3.57419	3.0418	3.43815	3.54267	3.82067	3.0418	3.0418	3.0418	3.0418	3.0418	3.0418	3.0418	3.47172	3.0418	4.1898
4930429F11Rik	3.0418	3.0418	3.0418	3.0418	3.0418	3.0418	3.0418	3.0418	3.0418	3.0418	3.0418	3.0418	3.0418	3.0418	3.0418	3.0418	3.0418	3.32866	3.0418	3.0418	3.0418	3.0418	3.0418	3.0418	3.0418	3.0418	3.34794	3.0418	3.0418	3.0418	3.0418	3.0418	3.0418	3.0418	3.0418	3.0418	3.0418	3.0418	3.0418	3.53069	3.42345	3.53954	3.45728	3.55409	3.0418	3.0418	3.0418	3.0418	3.0418
4930429F24Rik	4.00912	4.23838	3.96428	4.34594	3.0418	3.39271	3.54436	3.63962	3.64778	3.46455	3.98009	3.51431	3.69544	3.45428	3.53327	3.88245	3.0418	3.0418	3.46464	3.45895	3.70079	3.58724	3.53713	3.41859	3.40429	3.44142	3.57008	3.77799	3.76793	3.73911	4.63702	3.61891	3.74308	3.9128	4.2071	3.47886	3.60058	3.54267	3.82067	4.00621	3.69906	3.89567	3.62738	3.92015	3.58233	3.0418	3.64758	3.0418	3.75618
4930430A15Rik	3.0418	3.0418	3.0418	3.0418	3.0418	3.0418	3.0418	3.0418	3.0418	3.0418	3.0418	3.0418	3.0418	3.45428	3.0418	3.0418	3.40864	3.32866	3.46464	3.0418	3.50979	3.48803	3.0418	3.41859	3.0418	3.0418	3.0418	3.30456	3.0418	3.0418	3.0418	3.0418	3.0418	3.0418	3.0418	3.0418	3.0418	3.0418	3.0418	3.0418	3.0418	3.0418	3.0418	3.0418	3.0418	3.0418	3.0418	3.0418	3.0418
4930430D24Rik	3.0418	3.0418	3.0418	3.0418	3.0418	3.0418	3.0418	3.0418	3.0418	3.0418	3.0418	3.0418	3.0418	3.0418	3.0418	3.31103	3.0418	3.0418	3.0418	3.0418	3.0418	3.0418	3.0418	3.0418	3.0418	3.0418	3.0418	3.0418	3.55793	3.73911	3.86928	3.0418	3.0418	3.0418	3.0418	3.47886	3.0418	3.0418	3.59585	3.0418	3.0418	3.0418	3.0418	3.0418	3.0418	3.43106	3.47172	3.0418	3.0418
4930430F08Rik	8.78327	8.73345	8.56765	8.45734	7.05948	7.02814	6.92965	7.01416	6.83659	6.8925	7.53663	7.10007	7.03522	7.2178	7.06794	7.18419	6.89091	6.88835	6.99774	6.87178	6.30357	6.37775	7.12418	7.28666	7.04991	6.96925	6.89028	6.99347	8.11491	7.64763	6.31573	7.58793	7.60527	7.88489	7.83465	7.65249	7.86163	7.78592	7.4987	7.933	7.88894	7.82048	7.85446	7.93013	7.76373	7.9283	7.63005	7.69555	7.58475
4930430F21Rik	3.0418	3.0418	3.0418	3.0418	3.0418	3.0418	3.0418	3.0418	3.0418	3.0418	3.0418	3.0418	3.0418	3.0418	3.0418	3.0418	3.0418	3.0418	3.0418	3.0418	3.0418	3.0418	3.0418	3.0418	3.0418	3.0418	3.0418	3.0418	3.0418	3.0418	3.0418	3.0418	3.0418	3.0418	3.0418	3.0418	3.0418	3.0418	3.0418	3.0418	3.0418	3.0418	3.0418	3.0418	3.0418	3.0418	3.0418	3.0418	3.0418
4930430J02Rik	3.0418	3.0418	3.0418	3.0418	3.0418	3.0418	3.0418	3.0418	3.0418	3.0418	3.0418	3.0418	3.0418	3.0418	3.0418	3.0418	3.0418	3.0418	3.0418	3.0418	3.0418	3.0418	3.0418	3.0418	3.0418	3.0418	3.0418	3.0418	3.0418	3.0418	3.0418	3.0418	3.0418	3.40188	3.0418	3.0418	3.0418	3.0418	3.43477	3.0418	3.0418	3.0418	3.0418	3.0418	3.0418	3.0418	3.47172	3.0418	3.45704
4930431F12Rik	3.0418	3.0418	3.0418	3.0418	3.0418	3.0418	3.0418	3.0418	3.0418	3.0418	3.0418	3.0418	3.0418	3.0418	3.0418	3.0418	3.0418	3.0418	3.0418	3.0418	3.0418	3.0418	3.0418	3.0418	3.0418	3.0418	3.0418	3.0418	3.0418	3.0418	3.0418	3.0418	3.0418	3.54972	3.0418	3.0418	3.0418	3.54267	3.0418	3.0418	3.0418	3.0418	3.0418	3.0418	3.0418	3.0418	3.0418	3.0418	3.0418
4930431P03Rik	4.88494	4.86474	4.32591	4.2757	5.20341	5.4862	5.46633	5.71348	5.87803	5.63357	5.32305	4.54678	5.20911	4.8603	5.61046	5.54394	6.34839	6.24182	6.13685	6.33632	6.68355	6.48491	4.95161	5.19582	5.51809	5.09591	5.14559	5.1679	6.19117	5.59744	3.63087	5.85887	5.97776	6.02079	6.42636	5.19807	6.15347	5.49324	6.08162	5.30674	5.24281	5.41271	5.64942	5.00912	5.02295	5.99229	5.13627	5.39814	6.50139
4930432J09Rik	3.0418	3.0418	3.0418	3.0418	3.0418	3.0418	3.0418	3.0418	3.0418	3.0418	3.0418	3.0418	3.0418	3.0418	3.0418	3.0418	3.0418	3.0418	3.0418	3.0418	3.37344	3.0418	3.0418	3.0418	3.0418	3.0418	3.0418	3.0418	3.0418	3.0418	3.0418	3.0418	3.0418	3.0418	3.0418	3.0418	3.0418	3.0418	3.0418	3.0418	3.0418	3.53954	3.0418	3.0418	3.0418	3.0418	3.0418	3.0418	3.0418
4930432K21Rik	5.51511	5.46506	5.22083	5.33601	5.8882	5.99731	6.08671	6.08376	6.18328	6.31679	5.77931	5.66639	5.94956	5.69377	6.13978	6.05216	5.35925	5.42576	5.43987	5.55204	6.67737	6.92519	5.36797	5.8922	5.70819	5.77226	5.74256	5.87263	6.05715	6.17833	5.51129	6.3411	6.61667	6.29492	6.28512	5.55504	5.57193	5.64994	5.55446	5.30674	5.33242	5.60699	5.52173	6.06336	6.36305	6.07331	5.36988	5.91338	4.79528
4930432M17Rik	3.0418	3.0418	3.0418	3.0418	3.0418	3.0418	3.0418	3.0418	3.0418	3.0418	3.0418	3.0418	3.0418	3.0418	3.0418	3.0418	3.0418	3.0418	3.0418	3.0418	3.37344	3.0418	3.0418	3.0418	3.0418	3.0418	3.0418	3.0418	3.0418	3.0418	3.0418	3.0418	3.0418	3.0418	3.0418	3.0418	3.0418	3.0418	3.0418	3.53069	3.42345	3.0418	3.0418	3.0418	3.0418	3.0418	3.0418	3.51157	3.0418
4930433B08Rik	3.0418	3.0418	3.0418	3.0418	3.0418	3.0418	3.0418	3.0418	3.0418	3.0418	3.0418	3.0418	3.0418	3.0418	3.0418	3.0418	3.0418	3.0418	3.0418	3.0418	3.0418	3.0418	3.0418	3.0418	3.0418	3.0418	3.0418	3.0418	3.0418	3.0418	3.0418	3.0418	3.0418	3.0418	3.0418	3.0418	3.0418	3.0418	3.0418	3.0418	3.0418	3.0418	3.0418	3.0418	3.0418	3.0418	3.0418	3.0418	3.0418
4930433I11Rik	3.0418	3.0418	3.0418	3.0418	3.0418	3.0418	3.0418	3.0418	3.0418	3.0418	3.0418	3.0418	3.0418	3.0418	3.0418	3.0418	3.0418	3.0418	3.0418	3.0418	3.0418	3.0418	3.0418	3.0418	3.0418	3.0418	3.0418	3.0418	3.0418	3.0418	3.0418	3.0418	3.0418	3.0418	3.0418	3.0418	3.0418	3.0418	3.0418	3.0418	3.0418	3.0418	3.0418	3.0418	3.0418	3.0418	3.0418	3.0418	3.0418
4930433N12Rik	3.0418	3.0418	3.0418	3.0418	3.0418	3.0418	3.0418	3.0418	3.0418	3.0418	3.0418	3.0418	3.0418	3.0418	3.0418	3.0418	3.0418	3.0418	3.0418	3.0418	3.0418	3.0418	3.0418	3.0418	3.0418	3.0418	3.0418	3.0418	3.0418	3.0418	3.0418	3.0418	3.0418	3.0418	3.0418	3.0418	3.0418	3.0418	3.0418	3.0418	3.0418	3.0418	3.0418	3.0418	3.0418	3.0418	3.0418	3.0418	3.0418
4930434J06Rik	3.0418	3.0418	3.0418	3.0418	3.0418	3.0418	3.0418	3.0418	3.0418	3.0418	3.0418	3.0418	3.0418	3.0418	3.0418	3.0418	3.0418	3.0418	3.0418	3.0418	3.0418	3.0418	3.0418	3.0418	3.0418	3.0418	3.0418	3.0418	3.0418	3.0418	3.0418	3.0418	3.0418	3.0418	3.0418	3.0418	3.0418	3.0418	3.0418	3.0418	3.0418	3.0418	3.0418	3.0418	3.0418	3.0418	3.0418	3.0418	3.0418
4930435E12Rik	3.0418	3.0418	3.0418	3.0418	3.0418	3.0418	3.0418	3.0418	3.34646	3.34126	3.0418	3.0418	3.0418	3.0418	3.39016	3.0418	3.0418	3.0418	3.0418	3.0418	3.0418	3.0418	3.0418	3.0418	3.0418	3.0418	3.0418	3.0418	3.0418	3.0418	3.0418	3.0418	3.0418	3.0418	3.0418	3.0418	3.0418	3.0418	3.0418	3.0418	3.0418	3.7423	3.95855	3.76258	3.0418	3.0418	3.47172	3.0418	3.0418
4930438E09Rik	3.0418	3.0418	3.5089	3.0418	3.0418	3.0418	3.0418	3.0418	3.0418	3.0418	3.0418	3.0418	3.37071	3.45428	3.0418	3.0418	3.0418	3.0418	3.0418	3.0418	3.0418	3.0418	3.0418	3.0418	3.0418	3.0418	3.34794	3.0418	3.0418	3.0418	3.0418	3.0418	3.0418	3.0418	3.0418	3.0418	3.0418	3.0418	3.0418	3.53069	3.0418	3.0418	3.62738	3.55409	3.0418	3.0418	3.0418	3.0418	3.0418
4930440C22Rik	3.0418	3.0418	3.69955	3.67269	3.0418	3.0418	3.0418	3.0418	3.0418	3.0418	3.0418	3.0418	3.0418	3.0418	3.39016	3.0418	3.0418	3.0418	3.0418	3.0418	3.61373	3.0418	3.0418	3.0418	3.0418	3.0418	3.0418	3.0418	3.0418	3.0418	3.0418	3.0418	3.0418	3.0418	3.0418	3.0418	3.43815	3.0418	3.43477	3.0418	3.42345	3.0418	3.45728	3.0418	3.0418	3.0418	3.0418	3.0418	3.0418
4930440I19Rik	3.48085	3.0418	3.0418	3.0418	3.0418	3.0418	3.0418	3.0418	3.0418	3.0418	3.0418	3.0418	3.0418	3.0418	3.0418	3.31103	3.0418	3.0418	3.46464	3.45895	3.0418	3.0418	3.0418	3.0418	3.40429	3.0418	3.0418	3.0418	3.0418	3.0418	3.0418	3.0418	3.0418	3.0418	3.0418	3.0418	3.0418	3.0418	3.0418	3.72997	3.42345	3.0418	3.0418	3.0418	3.0418	3.0418	3.47172	3.0418	3.0418
4930441J16Rik	3.0418	3.0418	3.0418	3.0418	3.0418	3.0418	3.0418	3.0418	3.0418	3.0418	3.0418	3.0418	3.0418	3.0418	3.0418	3.0418	3.0418	3.0418	3.0418	3.0418	3.0418	3.0418	3.0418	3.0418	3.0418	3.0418	3.0418	3.0418	3.0418	3.0418	3.0418	3.0418	3.0418	3.0418	3.0418	3.0418	3.0418	3.0418	3.0418	3.0418	3.0418	3.0418	3.0418	3.0418	3.0418	3.0418	3.0418	3.0418	3.0418
4930442J19Rik	3.0418	3.0418	3.0418	3.0418	3.0418	3.0418	3.0418	3.0418	3.0418	3.0418	3.0418	3.0418	3.0418	3.0418	3.0418	3.0418	3.0418	3.0418	3.0418	3.0418	3.0418	3.0418	3.0418	3.0418	3.0418	3.0418	3.0418	3.0418	3.0418	3.0418	3.0418	3.0418	3.0418	3.0418	3.0418	3.0418	3.0418	3.0418	3.0418	3.0418	3.0418	3.0418	3.0418	3.0418	3.0418	3.0418	3.0418	3.0418	3.0418
4930442L01Rik	3.48085	3.0418	3.0418	3.0418	3.0418	3.0418	3.0418	3.0418	3.34646	3.0418	3.0418	3.37666	3.0418	3.0418	3.0418	3.0418	3.0418	3.0418	3.46464	3.0418	3.50979	3.0418	3.0418	3.0418	3.55311	3.0418	3.0418	3.0418	3.0418	3.0418	3.0418	3.45123	3.0418	3.0418	3.57419	3.0418	3.0418	3.0418	3.0418	3.72997	3.0418	3.0418	3.0418	3.0418	3.0418	3.0418	3.0418	3.51157	3.0418
4930443O20Rik	3.0418	3.99755	3.69955	3.0418	3.0418	3.39271	3.0418	3.0418	3.0418	3.0418	3.0418	3.51431	3.0418	3.0418	3.0418	3.0418	3.0418	3.0418	3.0418	3.0418	3.0418	3.0418	3.0418	3.41859	3.0418	3.0418	3.0418	3.41288	3.55793	3.53725	3.63087	3.61891	3.0418	3.0418	3.0418	3.0418	3.72407	3.0418	3.71833	3.53069	3.0418	3.7423	3.45728	3.76258	3.42512	3.0418	3.64758	3.0418	3.0418
4930444F02Rik	3.0418	3.0418	3.0418	3.48967	3.40646	3.0418	3.0418	3.0418	3.0418	3.0418	3.0418	3.0418	3.37071	3.0418	3.39016	3.42199	3.0418	3.0418	3.0418	3.0418	3.0418	3.48803	3.0418	3.41859	3.0418	3.0418	3.0418	3.0418	3.55793	3.53725	3.0418	3.85269	3.0418	3.66229	4.08947	3.0418	3.0418	3.54267	3.71833	3.53069	3.0418	3.0418	3.62738	3.0418	3.0418	3.43106	3.47172	3.0418	3.0418
4930444G20Rik	3.0418	3.0418	3.0418	3.0418	3.0418	3.0418	3.0418	3.0418	3.0418	3.0418	3.0418	3.0418	3.0418	3.0418	3.0418	3.0418	3.0418	3.0418	3.46464	3.0418	3.0418	3.0418	3.0418	3.0418	3.0418	3.0418	3.0418	3.0418	3.0418	3.0418	3.0418	3.0418	3.0418	3.0418	3.0418	3.0418	3.0418	3.0418	3.0418	3.0418	3.0418	3.0418	3.0418	3.0418	3.42512	3.0418	3.0418	3.0418	3.0418
4930444M15Rik	3.0418	3.0418	3.0418	3.0418	3.0418	3.0418	3.0418	3.0418	3.0418	3.0418	3.0418	3.0418	3.0418	3.0418	3.0418	3.0418	3.0418	3.0418	3.0418	3.0418	3.0418	3.0418	3.0418	3.0418	3.0418	3.0418	3.0418	3.0418	3.0418	3.0418	3.0418	3.0418	3.0418	3.40188	3.0418	3.0418	3.43815	3.0418	3.0418	3.0418	3.0418	3.0418	3.0418	3.0418	3.0418	3.0418	3.0418	3.0418	3.0418
4930444P10Rik	3.0418	3.47545	3.5089	3.0418	3.0418	3.0418	3.0418	3.0418	3.0418	3.0418	3.0418	3.0418	3.0418	3.0418	3.39016	3.50677	3.0418	3.0418	3.0418	3.0418	3.37344	3.35796	3.0418	3.0418	3.0418	3.0418	3.0418	3.0418	3.0418	3.0418	3.63087	3.0418	3.0418	3.0418	3.0418	3.0418	3.0418	3.0418	3.43477	3.0418	3.0418	3.0418	3.0418	3.0418	3.0418	3.0418	3.0418	3.51157	3.0418
4930447A16Rik	3.0418	3.0418	3.0418	3.0418	3.0418	3.0418	3.0418	3.0418	3.0418	3.0418	3.0418	3.0418	3.0418	3.0418	3.0418	3.0418	3.0418	3.0418	3.0418	3.0418	3.0418	3.0418	3.0418	3.0418	3.0418	3.0418	3.0418	3.0418	3.0418	3.0418	3.0418	3.0418	3.0418	3.0418	3.0418	3.47886	3.0418	3.0418	3.0418	3.0418	3.0418	3.0418	3.0418	3.0418	3.0418	3.0418	3.47172	3.0418	3.0418
4930447C04Rik	3.0418	3.0418	3.5089	3.0418	3.0418	3.0418	3.0418	3.0418	3.0418	3.0418	3.0418	3.0418	3.0418	3.62318	3.0418	3.0418	3.0418	3.0418	3.0418	3.0418	3.0418	3.0418	3.0418	3.0418	3.0418	3.0418	3.0418	3.30456	3.55793	3.0418	3.0418	3.45123	3.5401	3.40188	3.0418	3.0418	3.0418	3.0418	3.43477	3.0418	3.0418	3.0418	3.0418	3.0418	3.0418	3.0418	3.0418	3.0418	3.45704
4930447J18Rik	3.0418	3.0418	3.0418	3.0418	3.0418	3.0418	3.0418	3.0418	3.0418	3.0418	3.0418	3.0418	3.0418	3.0418	3.0418	3.0418	3.0418	3.0418	3.0418	3.0418	3.0418	3.0418	3.0418	3.0418	3.0418	3.0418	3.0418	3.0418	3.0418	3.0418	3.0418	3.0418	3.0418	3.0418	3.0418	3.0418	3.0418	3.0418	3.0418	3.0418	3.0418	3.0418	3.0418	3.0418	3.0418	3.0418	3.0418	3.51157	3.0418
4930447K03Rik	3.0418	3.0418	3.0418	3.0418	3.0418	3.0418	3.0418	3.0418	3.0418	3.0418	3.0418	3.0418	3.0418	3.0418	3.0418	3.0418	3.0418	3.0418	3.0418	3.0418	3.0418	3.0418	3.0418	3.0418	3.0418	3.0418	3.0418	3.0418	3.0418	3.0418	3.0418	3.45123	3.0418	3.75649	3.57419	3.0418	3.0418	3.0418	3.43477	3.0418	3.0418	3.0418	3.0418	3.0418	3.0418	3.0418	3.64758	3.0418	3.0418
4930447N08Rik	3.0418	3.0418	3.0418	3.0418	3.0418	3.0418	3.0418	3.0418	3.0418	3.0418	3.0418	3.0418	3.0418	3.0418	3.0418	3.0418	3.0418	3.0418	3.0418	3.0418	3.0418	3.0418	3.0418	3.0418	3.0418	3.0418	3.0418	3.0418	3.0418	3.0418	3.0418	3.45123	3.0418	3.66229	3.0418	3.0418	3.0418	3.0418	3.43477	3.0418	3.0418	3.0418	3.0418	3.0418	3.0418	3.0418	3.0418	3.0418	3.0418
4930448C13Rik	3.0418	3.0418	3.0418	3.67269	3.40646	3.0418	3.0418	3.0418	3.0418	3.0418	3.0418	3.0418	3.0418	3.0418	3.0418	3.0418	3.0418	3.32866	3.46464	3.0418	3.0418	3.35796	3.0418	3.0418	3.40429	3.0418	3.0418	3.0418	3.0418	3.0418	3.0418	3.0418	3.0418	3.0418	3.0418	3.0418	3.0418	3.0418	3.0418	3.53069	3.0418	3.0418	3.45728	3.0418	3.0418	3.0418	3.0418	3.0418	3.0418
4930448F12Rik	3.0418	3.0418	3.0418	3.0418	3.0418	3.0418	3.0418	3.0418	3.0418	3.0418	3.0418	3.0418	3.0418	3.0418	3.0418	3.0418	3.0418	3.0418	3.0418	3.0418	3.0418	3.0418	3.0418	3.0418	3.0418	3.0418	3.0418	3.0418	3.0418	3.0418	3.0418	3.0418	3.0418	3.0418	3.0418	3.0418	3.0418	3.0418	3.0418	3.0418	3.0418	3.0418	3.0418	3.0418	3.0418	3.0418	3.0418	3.0418	3.0418
4930448H16Rik	3.66036	3.0418	3.0418	3.48967	3.40646	3.0418	3.0418	3.0418	3.47186	3.0418	3.71101	3.0418	3.0418	3.0418	3.0418	3.0418	3.0418	3.0418	3.0418	3.0418	3.0418	3.0418	3.0418	3.0418	3.0418	3.0418	3.34794	3.41288	3.0418	3.0418	3.0418	3.0418	3.5401	3.0418	3.0418	3.0418	3.43815	3.54267	3.0418	3.0418	3.0418	3.89567	3.0418	3.55409	3.58233	3.0418	3.0418	3.0418	3.0418
4930448I06Rik	3.0418	3.0418	3.0418	3.0418	3.0418	3.0418	3.0418	3.0418	3.0418	3.0418	3.0418	3.0418	3.0418	3.0418	3.0418	3.0418	3.0418	3.0418	3.0418	3.0418	3.0418	3.0418	3.0418	3.0418	3.0418	3.0418	3.0418	3.0418	3.0418	3.0418	3.0418	3.0418	3.0418	3.0418	3.0418	3.0418	3.43815	3.0418	3.0418	3.0418	3.0418	3.0418	3.0418	3.0418	3.0418	3.0418	3.0418	3.0418	3.0418
4930448I18Rik	3.0418	3.0418	3.0418	3.0418	3.0418	3.0418	3.0418	3.0418	3.0418	3.0418	3.0418	3.0418	3.0418	3.0418	3.0418	3.0418	3.0418	3.0418	3.0418	3.0418	3.0418	3.0418	3.0418	3.0418	3.0418	3.0418	3.0418	3.0418	3.0418	3.0418	3.0418	3.0418	3.0418	3.0418	3.0418	3.0418	3.0418	3.0418	3.0418	3.0418	3.0418	3.0418	3.0418	3.0418	3.0418	3.0418	3.0418	3.0418	3.0418
4930448K20Rik	3.66036	3.0418	3.5089	3.48967	4.22133	4.12835	4.14424	4.06321	4.15594	3.97417	4.49006	4.21894	4.28006	4.52433	3.81341	4.18674	3.67382	3.93604	3.76908	3.75942	3.61373	3.92401	4.31686	4.02253	3.76121	4.27193	3.99431	3.86273	3.76793	4.12918	3.0418	3.94554	4.13521	4.20719	3.79057	4.31616	3.99809	3.54267	3.43477	4.1153	3.79861	4.02319	3.62738	3.76258	3.42512	3.98149	3.47172	3.70328	3.95803
4930449E01Rik	3.0418	3.0418	3.0418	3.0418	3.0418	3.0418	3.0418	3.0418	3.0418	3.0418	3.0418	3.0418	3.0418	3.0418	3.0418	3.0418	3.0418	3.0418	3.0418	3.0418	3.0418	3.0418	3.0418	3.0418	3.0418	3.0418	3.0418	3.30456	3.0418	3.0418	3.0418	3.0418	3.0418	3.0418	3.0418	3.0418	3.0418	3.0418	3.0418	3.0418	3.0418	3.0418	3.0418	3.0418	3.0418	3.0418	3.0418	3.0418	3.0418
4930449E18Rik	3.0418	3.0418	3.0418	3.0418	3.0418	3.0418	3.0418	3.0418	3.0418	3.0418	3.0418	3.0418	3.0418	3.0418	3.0418	3.0418	3.0418	3.32866	3.46464	3.0418	3.0418	3.0418	3.0418	3.0418	3.0418	3.0418	3.0418	3.0418	3.0418	3.0418	3.0418	3.0418	3.0418	3.0418	3.0418	3.0418	3.0418	3.0418	3.0418	3.0418	3.0418	3.0418	3.0418	3.0418	3.0418	3.0418	3.0418	3.0418	3.0418
4930449I24Rik	3.0418	3.0418	3.0418	3.0418	3.0418	3.0418	3.0418	3.0418	3.0418	3.0418	3.0418	3.0418	3.0418	3.0418	3.0418	3.0418	3.0418	3.0418	3.0418	3.0418	3.0418	3.0418	3.0418	3.0418	3.0418	3.0418	3.0418	3.0418	3.0418	3.0418	3.0418	3.0418	3.0418	3.0418	3.0418	3.0418	3.0418	3.0418	3.0418	3.0418	3.0418	3.0418	3.0418	3.0418	3.0418	3.0418	3.0418	3.0418	3.0418
4930451C15Rik	3.0418	3.0418	3.0418	3.0418	3.55615	3.0418	3.0418	3.0418	3.0418	3.0418	3.0418	3.0418	3.0418	3.0418	3.0418	3.0418	3.0418	3.0418	3.0418	3.0418	3.0418	3.0418	3.0418	3.0418	3.55311	3.0418	3.34794	3.30456	3.0418	3.0418	3.0418	3.0418	3.0418	3.0418	3.0418	3.47886	3.0418	3.0418	3.0418	3.0418	3.0418	3.7423	3.0418	3.0418	3.0418	3.43106	3.0418	3.0418	3.0418
4930451G09Rik	4.75635	4.64403	4.32591	4.47368	4.63512	4.7364	4.63487	4.61207	4.50445	4.42674	4.34725	4.82467	4.58237	4.30945	4.42769	4.48236	4.45581	4.67687	4.13797	4.58798	4.5018	4.34143	4.79448	4.87862	4.21464	4.14837	4.53779	4.4289	4.17288	5.00027	5.20582	5.13936	5.26766	4.74602	4.78799	4.70336	4.60371	4.56231	4.50495	4.71722	4.5088	5.26555	4.37644	4.95779	4.74448	4.53591	4.96551	5.19542	4.67171
4930451I11Rik	3.0418	3.0418	3.0418	3.0418	3.0418	3.0418	3.0418	3.0418	3.0418	3.0418	3.0418	3.0418	3.0418	3.0418	3.0418	3.0418	3.0418	3.0418	3.0418	3.0418	3.37344	3.35796	3.0418	3.0418	3.0418	3.0418	3.34794	3.0418	3.0418	3.0418	3.0418	3.0418	3.0418	3.0418	3.0418	3.0418	3.0418	3.0418	3.0418	3.0418	3.0418	3.0418	3.0418	3.55409	3.0418	3.0418	3.0418	3.0418	3.0418
4930452A19Rik	3.0418	3.0418	3.0418	3.0418	3.0418	3.0418	3.0418	3.0418	3.0418	3.0418	3.0418	3.0418	3.0418	3.0418	3.0418	3.0418	3.0418	3.0418	3.46464	3.0418	3.0418	3.0418	3.0418	3.0418	3.0418	3.0418	3.0418	3.0418	3.0418	3.0418	3.0418	3.0418	3.0418	3.0418	3.0418	3.0418	3.0418	3.0418	3.0418	3.0418	3.0418	3.0418	3.0418	3.0418	3.0418	3.0418	3.0418	3.0418	3.62704
4930452B06Rik	4.88494	5.05169	4.8063	5.47732	6.28571	6.32652	6.39762	6.2987	6.33094	6.42943	6.33217	6.50844	5.6797	5.87511	6.35298	6.32804	6.4852	6.14397	6.70276	6.55603	6.02809	5.66884	6.51116	6.92543	5.7229	5.6275	5.91609	6.13523	7.10246	6.64591	3.0418	7.03121	7.00069	7.63424	7.28121	6.243	5.4492	6.07902	5.92717	7.20721	7.08704	7.15698	7.52822	5.60452	6.66915	7.40323	5.6579	6.64904	6.37456
4930452G13Rik	3.48085	3.0418	3.0418	3.0418	3.0418	3.0418	3.0418	3.0418	3.0418	3.0418	3.0418	3.0418	3.0418	3.0418	3.0418	3.0418	3.0418	3.32866	3.0418	3.0418	3.50979	3.0418	3.0418	3.0418	3.0418	3.0418	3.0418	3.0418	3.0418	3.0418	3.0418	3.0418	3.0418	3.0418	3.0418	3.0418	3.0418	3.0418	3.0418	4.00621	3.0418	3.0418	3.0418	3.0418	3.0418	3.0418	3.47172	3.0418	3.0418
4930452N14Rik	3.0418	3.0418	3.0418	3.0418	3.0418	3.0418	3.0418	3.0418	3.0418	3.0418	3.0418	3.0418	3.0418	3.0418	3.0418	3.0418	3.0418	3.0418	3.0418	3.0418	3.0418	3.0418	3.0418	3.0418	3.0418	3.0418	3.0418	3.0418	3.0418	3.0418	3.0418	3.0418	3.0418	3.0418	3.0418	3.0418	3.0418	3.54267	3.0418	3.0418	3.0418	3.0418	3.0418	3.0418	3.0418	3.0418	3.0418	3.0418	3.0418
4930453H23Rik	3.0418	3.0418	3.0418	3.0418	3.0418	3.0418	3.0418	3.0418	3.0418	3.0418	3.0418	3.0418	3.0418	3.0418	3.0418	3.0418	3.0418	3.0418	3.0418	3.0418	3.0418	3.0418	3.0418	3.0418	3.0418	3.0418	3.0418	3.0418	3.0418	3.0418	3.0418	3.0418	3.0418	3.0418	3.0418	3.0418	3.0418	3.0418	3.0418	3.0418	3.0418	3.0418	3.0418	3.0418	3.0418	3.0418	3.0418	3.0418	3.0418
4930453L07Rik	3.0418	3.0418	3.0418	3.0418	3.0418	3.0418	3.0418	3.0418	3.0418	3.0418	3.0418	3.0418	3.0418	3.0418	3.0418	3.0418	3.0418	3.0418	3.0418	3.0418	3.0418	3.0418	3.0418	3.0418	3.0418	3.0418	3.0418	3.0418	3.0418	3.0418	3.0418	3.0418	3.0418	3.40188	3.0418	3.47886	3.0418	3.0418	3.0418	3.0418	3.0418	3.0418	3.0418	3.0418	3.0418	3.0418	3.0418	3.0418	3.0418
4930453N24Rik	8.86167	8.75615	8.7155	8.65648	7.39123	7.63129	7.62073	7.73242	7.59831	7.55809	7.69599	7.53143	7.62914	7.75102	7.44971	7.59247	7.61066	7.77488	7.5532	7.73035	7.4527	7.40715	7.55203	7.14944	7.72529	7.56279	7.34608	7.36934	8.42341	8.39236	8.44707	8.31014	8.55257	8.16726	8.3024	8.60539	8.8816	8.49257	8.60308	8.1524	8.32974	8.33166	8.37175	8.61455	8.30228	8.05489	8.57351	8.52953	8.66704
4930455B14Rik	3.48085	3.0418	3.0418	3.0418	3.0418	3.0418	3.0418	3.0418	3.0418	3.0418	3.0418	3.37666	3.0418	3.45428	3.0418	3.0418	3.0418	3.0418	3.0418	3.45895	3.0418	3.0418	3.0418	3.0418	3.0418	3.0418	3.0418	3.30456	3.0418	3.0418	3.0418	3.45123	3.0418	3.0418	3.57419	3.0418	3.43815	3.0418	3.0418	4.00621	3.42345	3.0418	3.0418	3.0418	3.0418	3.0418	3.0418	3.0418	3.0418
4930455C13Rik	3.91013	3.99755	3.96428	4.20014	4.76557	4.9005	4.53157	4.21354	4.53111	4.50762	5.10176	4.37736	4.425	4.1825	4.53582	4.79908	4.45581	4.77542	4.39865	4.38149	4.75907	4.82653	3.89162	4.53255	4.39883	4.27193	4.45549	4.33927	4.05841	3.89182	5.20582	4.46461	4.13521	4.2562	4.31189	4.44138	4.37153	4.41337	4.30811	4.52855	4.10049	3.7423	3.75658	4.52109	4.37952	3.81346	4.41994	4.33287	3.95803
4930455D15Rik	3.48085	3.0418	3.0418	3.0418	3.0418	3.39271	3.0418	3.46602	3.0418	3.0418	3.71101	3.0418	3.0418	3.0418	3.39016	3.0418	3.0418	3.0418	3.46464	3.0418	3.37344	3.0418	3.0418	3.0418	3.0418	3.44142	3.0418	3.0418	3.0418	3.0418	3.0418	3.0418	3.89661	3.0418	3.0418	3.0418	3.0418	3.0418	3.43477	3.53069	3.57998	3.0418	3.45728	3.0418	3.0418	3.0418	3.0418	3.0418	3.45704
4930455F16Rik	3.0418	3.0418	3.0418	3.0418	3.0418	3.0418	3.0418	3.0418	3.0418	3.0418	3.0418	3.0418	3.0418	3.0418	3.0418	3.0418	3.0418	3.0418	3.0418	3.0418	3.0418	3.0418	3.0418	3.0418	3.0418	3.0418	3.0418	3.0418	3.0418	3.0418	3.0418	3.0418	3.0418	3.0418	3.0418	3.0418	3.0418	3.0418	3.0418	3.88077	3.0418	3.53954	3.0418	3.0418	3.0418	3.0418	3.0418	3.0418	3.0418
4930455H04Rik	3.0418	3.0418	3.0418	3.0418	3.0418	3.0418	3.0418	3.0418	3.0418	3.0418	3.0418	3.0418	3.0418	3.0418	3.0418	3.0418	3.0418	3.0418	3.0418	3.0418	3.0418	3.0418	3.0418	3.0418	3.0418	3.0418	3.0418	3.0418	3.0418	3.0418	3.0418	3.0418	3.0418	3.0418	3.0418	3.0418	3.0418	3.0418	3.0418	3.0418	3.0418	3.0418	3.0418	3.0418	3.0418	3.0418	3.0418	3.0418	3.0418
4930455J16Rik	3.0418	3.0418	3.0418	3.0418	3.0418	3.0418	3.0418	3.0418	3.0418	3.0418	3.0418	3.0418	3.0418	3.0418	3.0418	3.0418	3.0418	3.0418	3.0418	3.0418	3.0418	3.0418	3.0418	3.0418	3.0418	3.0418	3.0418	3.0418	3.0418	3.0418	3.0418	3.0418	3.0418	3.0418	3.0418	3.0418	3.0418	3.0418	3.0418	3.0418	3.0418	3.0418	3.45728	3.0418	3.42512	3.0418	3.0418	3.0418	3.0418
4930456L15Rik	3.48085	3.0418	3.0418	3.0418	3.0418	3.0418	3.0418	3.0418	3.0418	3.0418	3.0418	3.0418	3.0418	3.0418	3.0418	3.0418	3.0418	3.0418	3.0418	3.0418	3.61373	3.0418	3.0418	3.0418	3.0418	3.0418	3.0418	3.0418	3.0418	3.0418	3.0418	3.0418	3.0418	3.0418	3.0418	3.0418	3.43815	3.0418	3.59585	3.0418	3.0418	3.0418	3.45728	3.0418	3.42512	3.0418	3.0418	3.70328	3.45704
4930459C07Rik	3.0418	3.0418	3.0418	3.0418	3.0418	3.0418	3.0418	3.0418	3.0418	3.0418	3.0418	3.0418	3.0418	3.0418	3.0418	3.0418	3.0418	3.0418	3.0418	3.0418	3.0418	3.0418	3.0418	3.0418	3.0418	3.0418	3.0418	3.0418	3.55793	3.89182	3.0418	4.35814	4.55506	3.75649	4.08947	4.09306	3.82725	3.90095	4.41107	3.0418	3.0418	3.0418	3.0418	3.0418	3.0418	3.0418	3.98954	3.96943	3.45704
4930459L07Rik	3.0418	3.0418	3.0418	3.0418	3.0418	3.0418	3.0418	3.0418	3.0418	3.0418	3.0418	3.0418	3.0418	3.0418	3.0418	3.0418	3.0418	3.0418	3.0418	3.0418	3.0418	3.0418	3.0418	3.0418	3.0418	3.0418	3.0418	3.0418	3.0418	3.0418	3.0418	3.0418	3.0418	3.0418	3.0418	3.0418	3.0418	3.0418	3.0418	3.0418	3.0418	3.0418	3.0418	3.0418	3.0418	3.0418	3.0418	3.0418	3.0418
4930461G14Rik	3.0418	3.0418	3.0418	3.0418	3.0418	3.0418	3.0418	3.0418	3.0418	3.0418	3.0418	3.0418	3.0418	3.45428	3.0418	3.0418	3.0418	3.0418	3.0418	3.0418	3.37344	3.0418	3.0418	3.0418	3.0418	3.0418	3.0418	3.0418	3.0418	3.0418	3.0418	3.0418	3.0418	3.0418	3.0418	3.0418	3.0418	3.0418	3.71833	3.0418	3.0418	3.0418	3.0418	3.0418	3.0418	3.0418	3.0418	3.70328	3.45704
4930463O16Rik	3.0418	3.0418	3.0418	3.0418	3.0418	3.0418	3.0418	3.0418	3.0418	3.0418	3.0418	3.0418	3.0418	3.0418	3.0418	3.0418	3.0418	3.0418	3.0418	3.0418	3.0418	3.0418	3.0418	3.0418	3.0418	3.0418	3.0418	3.0418	3.0418	3.0418	3.0418	3.0418	3.0418	3.0418	3.57419	3.0418	3.43815	3.54267	3.0418	3.0418	3.0418	3.0418	3.0418	3.0418	3.0418	3.0418	3.0418	3.0418	3.62704
4930465K10Rik	4.00912	4.23838	4.59137	4.2757	3.92362	4.07491	3.54436	3.63962	3.56755	3.55864	3.71101	3.61924	3.95861	4.1825	4.12076	3.57794	3.0418	3.61273	3.63768	3.86768	3.50979	4.11432	3.53713	3.69079	3.84411	3.92439	3.0418	3.56516	3.92661	4.12918	4.43946	4.35814	4.3241	3.98031	4.08947	4.24734	4.13968	4.14066	4.63239	4.21267	4.37401	4.40529	3.95855	4.35818	4.10497	3.71203	4.29641	4.33287	4.5335
4930465M20Rik	3.0418	3.0418	3.0418	3.0418	3.0418	3.0418	3.0418	3.0418	3.0418	3.0418	3.0418	3.0418	3.0418	3.0418	3.0418	3.0418	3.0418	3.0418	3.0418	3.0418	3.0418	3.0418	3.0418	3.0418	3.0418	3.0418	3.0418	3.0418	3.0418	3.0418	3.0418	3.0418	3.0418	3.40188	3.0418	3.0418	3.0418	3.0418	3.0418	3.0418	3.0418	3.0418	3.0418	3.0418	3.0418	3.0418	3.0418	3.0418	3.0418
4930467D21Rik	3.0418	3.0418	3.0418	3.0418	3.0418	3.0418	3.0418	3.0418	3.0418	3.0418	3.0418	3.0418	3.0418	3.0418	3.0418	3.0418	3.0418	3.0418	3.0418	3.0418	3.0418	3.0418	3.0418	3.0418	3.0418	3.0418	3.0418	3.0418	3.0418	3.0418	3.0418	3.0418	3.0418	3.0418	3.0418	3.0418	3.0418	3.0418	3.0418	3.0418	3.0418	3.53954	3.62738	3.0418	3.0418	3.0418	3.0418	3.0418	3.0418
4930467E23Rik	3.0418	3.0418	3.0418	3.0418	3.0418	3.0418	3.0418	3.0418	3.0418	3.0418	3.0418	3.0418	3.0418	3.0418	3.0418	3.0418	3.0418	3.0418	3.0418	3.0418	3.0418	3.0418	3.0418	3.0418	3.0418	3.0418	3.0418	3.0418	3.0418	3.0418	3.0418	3.0418	3.0418	3.0418	3.0418	3.0418	3.0418	3.0418	3.0418	3.0418	3.0418	3.0418	3.0418	3.0418	3.0418	3.0418	3.0418	3.0418	3.0418
4930467K11Rik	3.0418	3.0418	3.5089	3.48967	3.0418	3.0418	3.0418	3.0418	3.34646	3.34126	3.71101	3.0418	3.0418	3.0418	3.0418	3.42199	3.0418	3.32866	3.0418	3.45895	3.0418	3.35796	3.0418	3.41859	3.0418	3.0418	3.34794	3.0418	3.55793	3.0418	3.86928	3.0418	3.0418	3.54972	3.0418	3.47886	3.0418	3.0418	3.43477	3.0418	3.57998	3.0418	3.45728	3.0418	3.0418	3.0418	3.0418	3.51157	3.45704
4930468A15Rik	3.0418	3.0418	3.0418	3.0418	3.0418	3.0418	3.0418	3.0418	3.0418	3.0418	3.0418	3.0418	3.0418	3.0418	3.0418	3.0418	3.0418	3.0418	3.46464	3.0418	3.37344	3.0418	3.0418	3.0418	3.0418	3.0418	3.0418	3.0418	3.0418	3.0418	3.0418	3.0418	3.0418	3.0418	3.0418	3.0418	3.0418	3.0418	3.0418	3.0418	3.0418	3.0418	3.0418	3.0418	3.0418	3.0418	3.0418	3.51157	3.45704
4930469G21Rik	3.0418	3.0418	3.0418	3.0418	3.0418	3.0418	3.0418	3.0418	3.0418	3.0418	3.0418	3.0418	3.0418	3.0418	3.0418	3.0418	3.0418	3.32866	3.0418	3.0418	3.0418	3.0418	3.0418	3.0418	3.0418	3.0418	3.0418	3.0418	3.0418	3.0418	3.0418	3.0418	3.0418	3.0418	3.0418	3.0418	3.43815	3.0418	3.43477	3.0418	3.57998	3.0418	3.45728	3.0418	3.0418	3.0418	3.47172	3.0418	3.45704
4930470H14Rik	3.0418	3.0418	3.0418	3.0418	3.0418	3.0418	3.0418	3.0418	3.0418	3.0418	3.0418	3.0418	3.0418	3.0418	3.0418	3.0418	3.0418	3.0418	3.0418	3.0418	3.0418	3.0418	3.0418	3.0418	3.0418	3.0418	3.0418	3.0418	3.0418	3.0418	3.0418	3.0418	3.0418	3.0418	3.0418	3.0418	3.0418	3.0418	3.0418	3.0418	3.0418	3.0418	3.0418	3.0418	3.0418	3.0418	3.0418	3.0418	3.0418
4930470P17Rik	3.0418	3.0418	3.0418	3.0418	3.0418	3.0418	3.0418	3.0418	3.0418	3.0418	3.0418	3.0418	3.0418	3.0418	3.0418	3.0418	3.0418	3.0418	3.0418	3.0418	3.0418	3.0418	3.0418	3.0418	3.0418	3.0418	3.0418	3.0418	3.0418	3.0418	3.0418	3.0418	3.0418	3.0418	3.0418	3.0418	3.0418	3.0418	3.0418	3.0418	3.0418	3.0418	3.0418	3.0418	3.0418	3.0418	3.0418	3.0418	3.0418
4930471C04Rik	3.0418	3.0418	3.0418	3.0418	3.0418	3.0418	3.0418	3.0418	3.0418	3.0418	3.0418	3.0418	3.0418	3.0418	3.0418	3.0418	3.0418	3.0418	3.0418	3.0418	3.0418	3.0418	3.0418	3.0418	3.0418	3.0418	3.0418	3.0418	3.0418	3.0418	3.0418	3.0418	3.5401	3.0418	3.0418	3.0418	3.0418	3.0418	3.0418	3.0418	3.0418	3.0418	3.0418	3.0418	3.0418	3.0418	3.0418	3.0418	3.0418
4930471G03Rik	3.0418	3.0418	3.0418	3.0418	3.40646	3.0418	3.0418	3.0418	3.0418	3.0418	3.0418	3.0418	3.0418	3.0418	3.0418	3.0418	3.0418	3.0418	3.0418	3.0418	3.0418	3.0418	3.0418	3.0418	3.0418	3.0418	3.0418	3.0418	3.0418	3.0418	3.0418	3.0418	3.0418	3.0418	3.0418	3.0418	3.0418	3.0418	3.0418	3.0418	3.9636	3.53954	4.31816	3.0418	3.0418	3.0418	3.0418	3.0418	3.45704
4930471M09Rik	4.00912	4.16488	4.24762	4.20014	3.0418	3.0418	3.39806	3.0418	3.0418	3.0418	3.0418	3.0418	3.0418	3.0418	3.0418	3.31103	3.40864	3.32866	3.0418	3.0418	3.37344	3.0418	3.73895	3.41859	3.40429	3.0418	3.0418	3.0418	3.0418	3.53725	3.0418	3.0418	3.74308	3.40188	3.0418	3.0418	3.43815	3.0418	3.0418	3.53069	3.57998	3.0418	3.0418	3.0418	3.0418	3.59066	3.47172	3.0418	3.45704
4930473A02Rik	3.91013	3.89967	4.16255	3.67269	4.31808	4.35809	4.457	4.56332	4.39081	4.48132	4.18146	4.48213	4.425	4.57203	4.53582	4.60431	4.49602	4.28771	4.20988	4.43689	4.43571	4.60959	4.31686	4.25863	4.44018	4.27193	4.61445	4.3156	4.17288	4.31715	5.14726	4.35814	4.68608	4.3029	4.91153	4.49889	4.96268	4.49035	4.91694	4.1153	4.42084	4.40529	4.04282	4.26617	4.33032	4.76827	4.85071	4.59954	4.37572
4930473O22Rik	3.0418	3.0418	3.0418	3.0418	3.0418	3.0418	3.0418	3.0418	3.0418	3.0418	3.0418	3.0418	3.0418	3.0418	3.0418	3.0418	3.0418	3.0418	3.0418	3.0418	3.0418	3.0418	3.0418	3.0418	3.0418	3.0418	3.0418	3.0418	3.0418	3.0418	3.0418	3.0418	3.0418	3.0418	3.0418	3.0418	3.0418	3.0418	3.0418	3.0418	3.0418	3.0418	3.0418	3.0418	3.0418	3.0418	3.0418	3.0418	3.0418
4930474G06Rik	3.0418	3.0418	3.0418	3.0418	3.0418	3.0418	3.0418	3.0418	3.0418	3.0418	3.0418	3.0418	3.0418	3.0418	3.0418	3.31103	3.0418	3.0418	3.0418	3.0418	3.0418	3.0418	3.0418	3.0418	3.0418	3.0418	3.34794	3.30456	3.0418	3.0418	3.0418	3.0418	3.0418	3.0418	3.0418	3.0418	3.60058	3.0418	3.43477	3.88077	3.0418	3.0418	3.45728	3.76258	3.0418	3.0418	3.0418	3.0418	3.0418
4930474H20Rik	3.0418	3.0418	3.0418	3.0418	3.0418	3.0418	3.0418	3.0418	3.0418	3.0418	3.0418	3.0418	3.0418	3.0418	3.0418	3.0418	3.0418	3.0418	3.0418	3.0418	3.0418	3.0418	3.0418	3.0418	3.0418	3.0418	3.0418	3.0418	3.0418	3.0418	3.0418	3.45123	3.0418	3.0418	3.0418	3.0418	3.0418	3.0418	3.0418	3.0418	3.0418	3.0418	3.0418	3.0418	3.0418	3.0418	3.0418	3.0418	3.0418
4930474M22Rik	3.0418	3.0418	3.0418	3.0418	3.0418	3.0418	3.0418	3.0418	3.0418	3.0418	3.0418	3.0418	3.0418	3.0418	3.0418	3.0418	3.0418	3.0418	3.0418	3.0418	3.0418	3.0418	3.53713	3.0418	3.0418	3.0418	3.0418	3.0418	3.0418	3.0418	3.0418	3.0418	3.0418	3.0418	3.0418	3.0418	3.0418	3.0418	3.0418	3.0418	3.0418	3.0418	3.0418	3.0418	3.0418	3.0418	3.0418	3.0418	3.0418
4930474N05Rik	3.0418	3.0418	3.0418	3.0418	3.0418	3.0418	3.0418	3.0418	3.0418	3.0418	3.0418	3.0418	3.0418	3.0418	3.0418	3.0418	3.0418	3.0418	3.0418	3.0418	3.0418	3.0418	3.0418	3.0418	3.0418	3.0418	3.0418	3.0418	3.0418	3.0418	3.0418	3.0418	3.0418	3.0418	3.0418	3.0418	3.0418	3.0418	3.0418	3.0418	3.0418	3.0418	3.0418	3.0418	3.0418	3.0418	3.0418	3.0418	3.0418
4930474N09Rik	3.48085	3.47545	3.0418	3.0418	3.40646	3.39271	3.0418	3.63962	3.47186	3.34126	3.0418	3.37666	3.37071	3.62318	3.64229	3.57794	3.55921	3.32866	3.46464	3.62972	3.61373	3.58724	3.53713	3.41859	3.55311	3.0418	3.34794	3.73136	3.55793	3.0418	3.63087	3.45123	3.5401	3.0418	3.0418	3.0418	3.0418	3.0418	3.43477	3.72997	3.57998	3.0418	3.45728	3.0418	3.0418	3.0418	3.47172	3.0418	3.45704
4930478L05Rik	3.0418	3.0418	3.0418	3.0418	3.0418	3.0418	3.0418	3.0418	3.0418	3.0418	3.0418	3.0418	3.0418	3.0418	3.0418	3.0418	3.0418	3.0418	3.0418	3.0418	3.0418	3.0418	3.0418	3.0418	3.0418	3.0418	3.0418	3.0418	4.27493	4.39939	5.3673	5.13936	5.85713	5.43509	5.58344	4.38063	4.99341	4.33038	4.88481	3.0418	3.0418	3.0418	3.0418	3.0418	3.0418	3.0418	5.03659	4.91031	3.86398
4930478P22Rik	3.0418	3.0418	3.0418	3.0418	3.0418	3.0418	3.0418	3.0418	3.0418	3.0418	3.0418	3.0418	3.0418	3.45428	3.0418	3.0418	3.0418	3.0418	3.0418	3.0418	3.0418	3.0418	3.0418	3.0418	3.0418	3.0418	3.0418	3.0418	3.0418	3.0418	3.0418	3.0418	3.0418	3.0418	3.0418	3.0418	3.43815	3.0418	3.0418	3.0418	3.0418	3.53954	3.45728	3.0418	3.0418	3.0418	3.0418	3.0418	3.0418
4930479D17Rik	3.0418	3.0418	3.0418	3.0418	3.0418	3.0418	3.0418	3.0418	3.0418	3.0418	3.0418	3.0418	3.0418	3.0418	3.0418	3.0418	3.0418	3.0418	3.0418	3.0418	3.0418	3.0418	3.0418	3.0418	3.0418	3.0418	3.0418	3.0418	4.27493	4.0188	3.0418	3.74631	3.5401	3.9128	3.95391	3.79319	3.91734	3.54267	3.71833	3.0418	3.0418	3.0418	3.0418	3.0418	3.0418	3.0418	3.47172	3.84851	3.0418
4930480E11Rik	3.0418	3.47545	3.0418	3.0418	3.0418	3.0418	3.0418	3.0418	3.34646	3.0418	3.0418	3.0418	3.0418	3.0418	3.0418	3.0418	3.0418	3.32866	3.46464	3.0418	3.0418	3.0418	3.0418	3.0418	3.0418	3.0418	3.0418	3.0418	3.0418	3.0418	3.0418	3.0418	3.0418	3.0418	3.0418	3.0418	3.0418	3.0418	3.0418	3.0418	3.42345	3.0418	3.0418	3.0418	3.0418	3.0418	3.0418	3.0418	3.0418
4930480G23Rik	3.0418	3.0418	3.0418	3.0418	3.0418	3.0418	3.0418	3.0418	3.0418	3.0418	3.0418	3.0418	3.0418	3.0418	3.0418	3.0418	3.0418	3.0418	3.0418	3.0418	3.0418	3.0418	3.0418	3.0418	3.0418	3.0418	3.0418	3.0418	3.0418	3.0418	3.0418	3.0418	3.0418	3.0418	3.0418	3.0418	3.0418	3.0418	3.0418	3.0418	3.0418	3.0418	3.0418	3.0418	3.0418	3.0418	3.0418	3.0418	3.0418
4930480K15Rik	3.0418	3.0418	3.0418	3.0418	3.0418	3.0418	3.0418	3.0418	3.0418	3.0418	3.0418	3.0418	3.0418	3.0418	3.0418	3.0418	3.0418	3.0418	3.0418	3.0418	3.0418	3.0418	3.0418	3.0418	3.0418	3.0418	3.0418	3.0418	3.0418	3.0418	3.0418	3.0418	3.0418	3.0418	3.0418	3.0418	3.0418	3.0418	3.0418	3.0418	3.0418	3.0418	3.0418	3.0418	3.0418	3.0418	3.47172	3.0418	3.0418
4930480M12Rik	3.0418	3.0418	3.0418	3.0418	3.0418	3.0418	3.0418	3.0418	3.0418	3.0418	3.0418	3.0418	3.0418	3.0418	3.0418	3.0418	3.0418	3.0418	3.0418	3.0418	3.0418	3.0418	3.0418	3.0418	3.0418	3.0418	3.0418	3.0418	3.0418	3.0418	3.0418	3.0418	3.0418	3.0418	3.0418	3.0418	3.43815	3.0418	3.0418	3.0418	3.0418	3.0418	3.0418	3.0418	3.0418	3.0418	3.0418	3.0418	3.0418
4930481A15Rik	5.3836	5.21467	5.18492	5.36549	5.8882	5.69723	6.14005	6.2987	6.10713	5.83141	6.00267	6.04987	5.84344	5.98925	6.04668	6.00698	6.07444	6.13719	5.55741	5.17327	6.83567	6.71103	6.2548	6.20432	5.88817	5.97926	5.72186	5.77278	5.51998	5.68487	7.44945	5.08021	5.30603	5.41713	5.22262	5.67055	5.08136	6.22336	6.30256	6.31448	6.50907	6.08622	6.30161	5.96825	6.1512	6.34665	6.38258	6.32061	6.09534
4930482G09Rik	3.0418	3.0418	3.0418	3.0418	3.0418	3.0418	3.0418	3.0418	3.0418	3.0418	3.0418	3.0418	3.0418	3.0418	3.0418	3.0418	3.0418	3.0418	3.0418	3.0418	3.0418	3.0418	3.0418	3.0418	3.0418	3.0418	3.0418	3.0418	3.0418	3.0418	3.0418	3.0418	3.0418	3.0418	3.0418	3.0418	3.0418	3.0418	3.0418	3.0418	3.0418	3.0418	3.0418	3.0418	3.0418	3.0418	3.0418	3.0418	3.0418
4930483J18Rik	3.0418	3.0418	3.0418	3.0418	3.0418	3.39271	3.39806	3.46602	3.34646	3.46455	3.0418	3.37666	3.37071	3.0418	3.53327	3.0418	3.0418	3.0418	3.0418	3.0418	3.70079	3.35796	3.53713	3.41859	3.0418	3.44142	3.34794	3.30456	3.55793	3.73911	3.86928	3.61891	3.0418	3.66229	3.95391	3.0418	3.72407	3.74667	3.0418	3.0418	3.57998	3.0418	4.11961	3.0418	3.58233	3.43106	3.47172	3.51157	3.45704
4930483K19Rik	5.48982	5.30349	4.94556	5.275	5.875	6.04158	6.04253	5.67244	5.60341	5.48769	5.67877	5.7299	5.99973	5.97351	5.5505	5.59793	5.74821	5.56614	6.10691	6.0456	5.0742	4.97193	5.36797	5.98685	5.7229	5.82285	4.99247	5.51298	5.44893	5.65634	3.63087	5.27644	5.22813	5.38047	5.39509	5.28936	4.96268	5.23776	5.14813	5.23191	5.37505	5.57648	5.04364	5.32038	5.56063	5.49589	5.61395	5.30066	5.40416
4930483O08Rik	3.0418	3.0418	3.0418	3.0418	3.0418	3.0418	3.0418	3.0418	3.0418	3.0418	3.0418	3.0418	3.0418	3.0418	3.0418	3.0418	3.0418	3.0418	3.0418	3.0418	3.0418	3.0418	3.0418	3.0418	3.0418	3.0418	3.0418	3.0418	3.0418	3.0418	3.0418	3.0418	3.0418	3.0418	3.0418	3.0418	3.0418	3.0418	3.0418	3.0418	3.0418	3.0418	3.0418	3.0418	3.0418	3.0418	3.0418	3.0418	3.0418
4930486F22Rik	3.0418	3.0418	3.0418	3.0418	3.0418	3.0418	3.0418	3.0418	3.0418	3.0418	3.0418	3.0418	3.0418	3.0418	3.0418	3.0418	3.0418	3.0418	3.0418	3.0418	3.0418	3.0418	3.0418	3.0418	3.0418	3.0418	3.0418	3.0418	3.0418	3.0418	3.0418	3.0418	3.0418	3.0418	3.0418	3.0418	3.43815	3.0418	3.0418	3.0418	3.0418	3.0418	3.0418	3.0418	3.0418	3.0418	3.0418	3.0418	3.0418
4930486I03Rik	3.0418	3.0418	3.0418	3.0418	3.0418	3.0418	3.0418	3.0418	3.0418	3.0418	3.0418	3.0418	3.0418	3.0418	3.0418	3.0418	3.0418	3.0418	3.0418	3.0418	3.0418	3.35796	3.0418	3.0418	3.0418	3.0418	3.0418	3.30456	3.0418	3.0418	3.0418	3.0418	3.0418	3.40188	3.0418	3.0418	3.0418	3.0418	3.0418	3.0418	3.0418	3.0418	3.45728	3.0418	3.0418	3.0418	3.0418	3.0418	3.0418
4930486L24Rik	4.55992	4.73726	4.39865	4.02797	3.67012	3.0418	3.54436	3.0418	5.34348	5.43945	3.0418	3.51431	3.83903	3.62318	5.61046	5.67511	4.22803	4.34477	3.46464	3.45895	5.9679	5.81149	3.0418	3.57317	3.66641	3.92439	5.41957	5.38154	6.0804	5.62721	5.79761	3.45123	3.0418	4.20719	3.79057	3.79319	5.78849	3.54267	3.91006	3.88077	4.03476	4.55349	4.6283	3.76258	4.37952	3.98149	3.47172	3.70328	4.94258
4930487D11Rik	3.0418	3.0418	3.0418	3.0418	3.0418	3.0418	3.0418	3.0418	3.0418	3.0418	3.0418	3.0418	3.0418	3.45428	3.0418	3.31103	3.0418	3.0418	3.0418	3.0418	3.0418	3.0418	3.0418	3.0418	3.0418	3.0418	3.34794	3.0418	3.0418	3.0418	3.0418	3.0418	3.0418	3.0418	3.0418	3.0418	3.0418	3.0418	3.0418	3.0418	3.57998	3.0418	3.45728	3.0418	3.0418	3.0418	3.0418	3.0418	3.0418
4930487H11Rik	3.0418	3.0418	3.0418	3.0418	3.0418	3.0418	3.0418	3.0418	3.0418	3.0418	3.0418	3.0418	3.0418	3.0418	3.0418	3.0418	3.0418	3.0418	3.0418	3.0418	3.0418	3.0418	3.0418	3.0418	3.0418	3.0418	3.0418	3.0418	3.0418	3.0418	3.0418	4.02871	3.74308	3.83887	3.79057	3.0418	3.0418	3.0418	3.0418	3.0418	3.0418	3.0418	3.0418	3.0418	3.0418	3.0418	3.0418	3.51157	3.45704
4930488B22Rik	3.0418	3.0418	3.0418	3.0418	3.0418	3.0418	3.0418	3.0418	3.0418	3.0418	3.0418	3.0418	3.0418	3.0418	3.0418	3.0418	3.0418	3.0418	3.0418	3.0418	3.0418	3.0418	3.0418	3.0418	3.0418	3.0418	3.0418	3.0418	3.0418	3.0418	3.0418	3.0418	3.0418	3.0418	3.0418	3.0418	3.0418	3.0418	3.0418	3.0418	3.0418	3.0418	3.0418	3.0418	3.0418	3.0418	3.64758	3.0418	3.0418
4930488L21Rik	3.0418	3.0418	3.5089	3.0418	3.0418	3.0418	3.0418	3.0418	3.34646	3.0418	3.0418	3.0418	3.0418	3.0418	3.0418	3.0418	3.0418	3.0418	3.0418	3.0418	3.0418	3.0418	3.0418	3.0418	3.0418	3.44142	3.34794	3.0418	3.0418	3.0418	3.0418	3.0418	3.0418	3.54972	3.57419	3.0418	3.0418	3.0418	3.0418	3.0418	3.0418	3.0418	3.0418	3.0418	3.0418	3.0418	3.0418	3.0418	3.0418
4930500F04Rik	3.0418	3.0418	3.0418	3.0418	3.0418	3.0418	3.0418	3.0418	3.0418	3.0418	3.0418	3.0418	3.0418	3.0418	3.0418	3.0418	3.0418	3.0418	3.0418	3.0418	3.0418	3.0418	3.0418	3.0418	3.0418	3.0418	3.0418	3.0418	3.0418	3.0418	3.0418	3.0418	3.0418	3.0418	3.0418	3.0418	3.43815	3.0418	3.0418	3.0418	3.0418	3.0418	3.0418	3.0418	3.0418	3.0418	3.0418	3.0418	3.0418
4930500J02Rik	4.09768	4.64403	4.64891	5.07279	4.05501	4.17885	3.97064	4.14142	3.34646	3.63755	3.98009	3.97471	4.15577	4.24802	3.53327	3.50677	3.99741	3.93604	4.2768	4.04673	3.61373	3.0418	4.54671	4.40441	4.21464	4.32835	3.57008	3.62615	3.55793	3.89182	3.0418	3.94554	4.13521	4.2562	3.95391	4.91742	4.3184	4.62995	4.59148	4.1153	4.21923	4.13403	4.25635	4.35818	4.27865	4.24162	4.63138	4.65732	4.79528
4930500L23Rik	3.0418	3.0418	3.0418	3.0418	3.0418	3.0418	3.0418	3.0418	3.0418	3.0418	3.0418	3.0418	3.0418	3.0418	3.0418	3.0418	3.0418	3.0418	3.0418	3.0418	3.0418	3.0418	3.0418	3.0418	3.0418	3.0418	3.0418	3.0418	3.0418	3.0418	3.0418	3.0418	3.0418	3.0418	3.0418	3.0418	3.0418	3.0418	3.0418	3.0418	3.0418	3.0418	3.0418	3.0418	3.0418	3.0418	3.0418	3.70328	3.0418
4930502A04Rik	3.0418	3.0418	3.0418	3.0418	3.0418	3.0418	3.0418	3.0418	3.0418	3.0418	3.0418	3.0418	3.0418	3.0418	3.0418	3.0418	3.0418	3.0418	3.0418	3.0418	3.0418	3.0418	3.0418	3.0418	3.0418	3.0418	3.0418	3.0418	3.0418	3.0418	3.0418	3.0418	3.0418	3.0418	3.0418	3.0418	3.0418	3.0418	3.0418	3.0418	3.0418	3.0418	3.0418	3.0418	3.0418	3.0418	3.0418	3.0418	3.0418
4930502E09Rik	3.79656	3.65281	4.06899	3.81149	3.67012	3.95709	3.74903	4.06321	4.22891	4.17438	3.98009	4.12899	4.01227	4.1825	3.88511	3.9964	3.85353	3.97825	3.87872	3.86768	3.8455	4.07054	3.89162	4.14808	3.76121	4.00575	4.12223	3.86273	4.05841	4.31715	4.04864	3.85269	4.13521	3.98031	4.08947	3.90628	4.26237	4.33038	4.45902	4.21267	3.88559	4.13403	4.19043	3.76258	4.22417	3.71203	3.78108	4.25419	3.62704
4930502E18Rik	3.0418	3.0418	3.0418	3.0418	3.0418	3.0418	3.0418	3.0418	3.0418	3.0418	3.0418	3.0418	3.0418	3.0418	3.0418	3.0418	3.0418	3.0418	3.0418	3.0418	3.0418	3.0418	3.0418	3.0418	3.0418	3.0418	3.0418	3.0418	3.0418	3.0418	3.0418	3.0418	3.0418	3.0418	3.0418	3.0418	3.0418	3.0418	3.0418	3.0418	3.0418	3.0418	3.0418	3.0418	3.0418	3.0418	3.0418	3.0418	3.0418
4930503B20Rik	3.66036	3.0418	3.5089	3.0418	3.40646	3.0418	3.54436	3.63962	3.47186	3.46455	3.0418	3.0418	3.83903	3.62318	3.0418	3.42199	3.0418	3.0418	3.63768	3.0418	3.0418	3.0418	3.53713	3.0418	3.84411	3.44142	3.57008	3.62615	3.0418	3.73911	3.63087	3.0418	3.0418	3.40188	3.0418	3.0418	3.60058	3.0418	3.43477	3.0418	3.57998	3.7423	3.0418	3.0418	3.0418	3.0418	3.47172	3.51157	3.0418
4930503E14Rik	3.0418	3.0418	3.0418	3.0418	3.0418	3.0418	3.0418	3.0418	3.0418	3.0418	3.0418	3.0418	3.0418	3.0418	3.0418	3.0418	3.0418	3.0418	3.0418	3.0418	3.0418	3.0418	3.0418	3.0418	3.0418	3.0418	3.0418	3.0418	3.0418	3.53725	3.0418	3.0418	3.0418	3.0418	3.0418	3.0418	3.0418	3.0418	3.0418	3.0418	3.0418	3.0418	3.0418	3.0418	3.0418	3.0418	3.47172	3.0418	3.0418
4930503E24Rik	3.66036	3.0418	3.0418	3.0418	4.96461	4.87464	4.84542	5.26192	4.36041	4.6306	5.17977	4.79963	4.93494	5.18152	4.53582	4.73191	4.32526	4.05673	4.45466	4.43689	4.16461	4.07054	4.79448	4.7182	4.26393	4.32835	4.19846	4.45018	3.92661	4.54704	3.0418	4.23952	3.89661	4.39035	3.79057	4.31616	3.82725	3.54267	3.99018	3.88077	3.9636	4.68441	4.04282	5.00912	4.59655	4.39897	3.98954	3.84851	3.95803
4930503H13Rik	3.0418	3.0418	3.0418	3.0418	3.0418	3.0418	3.0418	3.0418	3.0418	3.0418	3.0418	3.0418	3.0418	3.0418	3.0418	3.0418	3.0418	3.0418	3.46464	3.0418	3.0418	3.0418	3.0418	3.0418	3.0418	3.0418	3.0418	3.0418	3.0418	3.53725	3.0418	3.0418	3.0418	3.0418	3.0418	3.0418	3.43815	3.0418	3.0418	3.0418	3.0418	3.0418	3.0418	3.0418	3.42512	3.0418	3.0418	3.0418	3.0418
4930503L19Rik	9.31255	9.13085	9.23669	9.28073	9.03523	9.10208	9.00988	8.87967	9.23729	9.24158	9.19573	9.23135	9.18296	9.24323	9.3049	9.30411	9.0031	8.96044	9.1126	9.04061	9.18905	9.03066	9.18245	9.32328	9.24911	9.20749	9.27369	9.17873	9.57985	9.24741	8.22997	9.1962	9.34737	9.3896	9.4307	9.36613	10.0839	9.14666	9.49614	9.26221	9.11745	9.61584	9.66181	9.76055	9.73085	9.58484	9.12178	9.27149	8.90898
4930503O07Rik	3.0418	3.0418	3.0418	3.0418	3.0418	3.0418	3.0418	3.0418	3.0418	3.0418	3.0418	3.0418	3.0418	3.0418	3.0418	3.0418	3.0418	3.0418	3.0418	3.0418	3.0418	3.0418	3.0418	3.0418	3.0418	3.0418	3.0418	3.0418	3.0418	3.0418	3.63087	3.0418	3.0418	3.0418	3.0418	3.0418	3.0418	3.0418	3.0418	3.0418	3.0418	3.0418	3.0418	3.0418	3.0418	3.0418	3.0418	3.0418	3.0418
4930504O13Rik	3.48085	3.0418	3.0418	3.0418	3.0418	3.0418	3.0418	3.0418	3.0418	3.0418	3.0418	3.0418	3.0418	3.0418	3.0418	3.0418	3.0418	3.0418	3.0418	3.0418	3.0418	3.0418	3.0418	3.0418	3.0418	3.0418	3.34794	3.0418	3.0418	3.0418	3.0418	3.0418	3.0418	3.0418	3.0418	3.0418	3.0418	3.0418	3.0418	3.0418	3.0418	3.0418	3.0418	3.0418	3.0418	3.0418	3.0418	3.0418	3.0418
4930505A04Rik	3.0418	3.47545	3.0418	3.0418	3.0418	3.0418	3.0418	3.0418	3.0418	3.0418	3.0418	3.0418	3.0418	3.0418	3.0418	3.0418	3.0418	3.0418	3.46464	3.0418	3.0418	3.0418	3.0418	3.0418	3.0418	3.0418	3.0418	3.30456	3.0418	3.0418	3.0418	3.0418	3.0418	3.40188	3.0418	3.0418	3.0418	3.0418	3.0418	3.0418	3.42345	3.0418	3.45728	3.0418	3.42512	3.0418	3.47172	3.0418	3.62704
4930505G20Rik	3.0418	3.0418	3.0418	3.0418	3.0418	3.0418	3.0418	3.0418	3.0418	3.0418	3.0418	3.0418	3.0418	3.0418	3.0418	3.0418	3.0418	3.0418	3.0418	3.0418	3.0418	3.0418	3.0418	3.0418	3.0418	3.0418	3.0418	3.0418	3.0418	3.0418	3.0418	3.0418	3.0418	3.0418	3.0418	3.0418	3.0418	3.0418	3.0418	3.0418	3.0418	3.0418	3.0418	3.0418	3.0418	3.0418	3.0418	3.0418	3.0418
4930506C21Rik	4.50506	4.48831	3.96428	4.11812	5.36718	5.80465	5.16081	5.23334	5.72199	5.79406	5.51259	5.74226	5.24392	5.23713	5.42197	5.71617	5.39789	5.03071	5.10649	5.25818	5.29343	5.22049	5.36797	5.76018	5.33631	5.3058	5.6795	5.50401	5.51998	5.56701	7.02352	5.13936	4.91132	4.94332	5.31166	5.25963	5.59135	5.38968	5.55446	5.81561	5.65781	5.34117	5.38072	5.5389	5.54207	5.59213	5.72129	5.26651	4.83379
4930506M07Rik	5.07344	5.46506	6.86918	6.97193	7.64914	7.45293	7.79175	8.00262	5.00211	4.65369	8.86822	8.61464	9.8045	9.8758	5.2609	5.21238	6.70245	6.84781	9.81473	9.87953	5.29343	4.80429	9.02301	8.51558	10.0507	10.4907	4.83877	5.43945	6.37094	7.48305	3.0418	7.69425	8.07803	9.10342	9.32494	9.95973	7.121	9.98442	10.7373	8.84041	9.15608	8.75855	7.85446	8.70079	8.17951	8.71574	9.69391	9.32993	7.34924
4930507D05Rik	4.66226	4.64403	4.64891	4.69192	4.05501	4.01804	4.03244	4.14142	3.98985	3.87854	3.71101	4.08052	4.49066	4.03583	3.81341	3.96019	4.06085	4.34477	4.39865	4.53986	3.50979	3.86859	4.12893	4.30956	4.3109	3.83361	3.84295	3.97417	4.05841	4.12918	3.86928	3.74631	4.02426	4.10089	4.2071	4.00486	4.26237	4.0292	4.41107	4.38246	4.16174	4.23294	3.75658	4.35818	4.03899	3.43106	4.4767	4.40595	4.31747
4930507D10Rik	3.0418	3.0418	3.0418	3.0418	3.0418	3.0418	3.0418	3.0418	3.0418	3.0418	3.0418	3.0418	3.0418	3.45428	3.0418	3.31103	3.0418	3.0418	3.46464	3.45895	3.0418	3.0418	3.0418	3.0418	3.0418	3.0418	3.34794	3.30456	3.55793	3.0418	3.0418	3.0418	3.0418	3.40188	3.0418	3.0418	3.0418	3.0418	3.0418	3.0418	3.42345	3.0418	3.45728	3.0418	3.0418	3.0418	3.0418	3.0418	3.0418
4930509E16Rik	5.46404	5.41335	6.41516	6.46771	5.3863	5.75199	5.07184	5.23334	5.24423	5.25538	5.72996	5.44064	5.29447	5.43874	5.09901	5.28118	5.47198	5.10544	5.38982	4.98464	4.75907	4.60959	5.65584	5.54387	5.23518	5.2564	5.01042	5.24668	5.80051	5.21747	4.19703	5.11013	5.01015	5.06724	4.78799	6.08796	5.88521	5.98933	5.55446	5.73853	5.31058	5.85469	5.38072	5.81217	5.59701	5.87638	6.14497	5.95571	5.49808
4930509J09Rik	3.0418	3.0418	3.0418	3.0418	3.0418	3.0418	3.0418	3.0418	3.0418	3.0418	3.0418	3.0418	3.0418	3.0418	3.0418	3.0418	3.0418	3.0418	3.0418	3.0418	3.0418	3.0418	3.0418	3.0418	3.0418	3.0418	3.0418	3.0418	3.0418	3.0418	3.0418	3.0418	3.0418	3.0418	3.0418	3.0418	3.0418	3.0418	3.0418	3.0418	3.0418	3.0418	3.0418	3.0418	3.0418	3.0418	3.0418	3.0418	3.0418
4930509K18Rik	3.0418	3.0418	3.0418	3.0418	3.0418	3.0418	3.0418	3.0418	3.0418	3.0418	3.0418	3.0418	3.0418	3.0418	3.0418	3.0418	3.0418	3.0418	3.0418	3.0418	3.0418	3.0418	3.0418	3.0418	3.0418	3.0418	3.0418	3.0418	3.0418	3.0418	3.0418	3.0418	3.0418	3.0418	3.0418	3.0418	3.0418	3.0418	3.0418	3.0418	3.0418	3.0418	3.0418	3.0418	3.0418	3.0418	3.0418	3.0418	3.0418
4930511A02Rik	3.0418	3.0418	3.0418	3.0418	3.0418	3.0418	3.0418	3.0418	3.0418	3.0418	3.0418	3.0418	3.0418	3.0418	3.0418	3.0418	3.0418	3.0418	3.0418	3.0418	3.0418	3.0418	3.0418	3.0418	3.0418	3.0418	3.0418	3.0418	3.0418	3.0418	3.0418	3.0418	3.0418	3.0418	3.0418	3.0418	3.0418	3.0418	3.0418	3.0418	3.0418	3.0418	3.0418	3.0418	3.0418	3.0418	3.0418	3.0418	3.45704
4930511E03Rik	3.0418	3.0418	3.0418	3.0418	3.0418	3.0418	3.0418	3.0418	3.0418	3.0418	3.0418	3.0418	3.0418	3.0418	3.0418	3.0418	3.0418	3.0418	3.0418	3.0418	3.0418	3.0418	3.0418	3.0418	3.0418	3.0418	3.0418	3.0418	3.0418	3.53725	3.0418	3.0418	3.0418	3.0418	3.57419	3.0418	3.0418	3.0418	3.43477	3.0418	3.0418	3.0418	3.0418	3.0418	3.0418	3.0418	3.0418	3.0418	3.0418
4930511M06Rik	3.0418	3.0418	3.0418	3.0418	3.0418	3.0418	3.0418	3.0418	3.0418	3.0418	3.0418	3.0418	3.0418	3.0418	3.0418	3.0418	3.0418	3.0418	3.0418	3.0418	3.0418	3.0418	3.0418	3.0418	3.0418	3.0418	3.47394	3.49566	3.0418	3.0418	3.0418	3.0418	3.0418	3.40188	3.79057	3.0418	3.0418	3.0418	3.0418	3.0418	3.0418	3.0418	3.45728	3.0418	3.0418	3.0418	3.0418	3.0418	3.45704
4930512B01Rik	3.79656	3.99755	4.16255	3.92718	3.40646	3.53686	3.54436	3.63962	3.64778	3.55864	3.71101	3.37666	3.60906	3.0418	3.39016	3.57794	3.40864	3.32866	3.63768	3.0418	3.8455	3.86859	3.0418	3.0418	3.40429	3.44142	3.47394	3.41288	3.0418	3.0418	3.86928	3.61891	3.0418	3.75649	4.2071	3.79319	3.72407	3.0418	3.82067	3.72997	3.42345	3.7423	3.86444	4.26617	4.03899	3.59066	3.0418	3.0418	3.0418
4930513D17Rik	3.0418	3.0418	3.0418	3.0418	3.40646	3.0418	3.0418	3.0418	3.34646	3.0418	3.0418	3.0418	3.0418	3.0418	3.39016	3.0418	3.0418	3.0418	3.0418	3.45895	3.0418	3.0418	3.0418	3.41859	3.0418	3.0418	3.0418	3.0418	3.0418	3.0418	3.0418	3.0418	3.0418	3.0418	3.0418	3.0418	3.0418	3.0418	3.0418	3.0418	3.42345	3.0418	3.45728	3.0418	3.0418	3.59066	3.0418	3.0418	3.0418
4930513N10Rik	5.63496	5.83965	5.66788	5.65317	6.43572	6.46213	6.49044	6.35088	6.24847	6.29049	6.04334	6.4577	6.54105	6.29721	6.36155	6.2585	6.71729	6.51071	6.27766	6.61889	6.38206	6.74903	6.32783	6.11181	6.17994	6.23541	6.17954	5.83072	5.82841	6.21737	5.64141	6.21562	6.15138	6.175	6.10422	6.18302	6.15347	6.3363	6.41183	6.41573	6.29998	6.26619	6.0518	6.3152	6.51971	6.22251	6.2477	6.54321	5.90666
4930513O06Rik	3.0418	3.0418	3.0418	3.0418	3.0418	3.0418	3.0418	3.0418	3.0418	3.0418	3.0418	3.0418	3.0418	3.0418	3.0418	3.0418	3.0418	3.0418	3.0418	3.0418	3.0418	3.35796	3.0418	3.0418	3.0418	3.0418	3.34794	3.30456	3.0418	3.0418	3.0418	3.0418	3.0418	3.0418	3.0418	3.0418	3.0418	3.0418	3.0418	3.0418	3.0418	3.0418	3.0418	3.0418	3.0418	3.0418	3.0418	3.0418	3.0418
4930515B02Rik	3.0418	3.0418	3.0418	3.0418	3.0418	3.0418	3.0418	3.0418	3.0418	3.0418	3.0418	3.0418	3.0418	3.0418	3.0418	3.0418	3.0418	3.0418	3.0418	3.0418	3.0418	3.0418	3.0418	3.0418	3.0418	3.0418	3.0418	3.0418	3.0418	3.0418	3.0418	3.45123	3.0418	3.0418	3.0418	3.0418	3.0418	3.0418	3.0418	3.0418	3.0418	3.0418	3.0418	3.0418	3.0418	3.0418	3.0418	3.0418	3.0418
4930515G01Rik	5.108	5.30349	5.47754	5.45023	5.3281	5.11202	4.49491	4.86838	5.39702	5.26941	5.10176	5.16899	5.13657	5.06259	5.35278	5.37809	5.39789	5.3068	4.9732	5.08242	5.64624	5.68035	5.09117	5.09859	4.66028	5.2564	5.4707	5.37164	4.60506	5.04675	5.20582	4.69307	4.4834	4.61677	4.57489	5.0999	4.60371	5.23776	5.00864	4.97744	5.26579	5.34117	5.33021	5.00912	5.25101	5.41364	5.19869	5.36643	5.85521
4930515G16Rik	3.0418	3.0418	3.0418	3.0418	3.0418	3.0418	3.0418	3.46602	3.0418	3.0418	3.71101	3.0418	3.0418	3.0418	3.0418	3.0418	3.0418	3.0418	3.0418	3.0418	3.0418	3.0418	3.0418	3.0418	3.0418	3.0418	3.0418	3.0418	3.0418	3.0418	3.0418	3.0418	3.0418	3.0418	3.0418	3.0418	3.60058	3.0418	3.0418	3.0418	3.0418	3.0418	3.0418	3.0418	3.0418	3.0418	3.0418	3.0418	3.0418
4930515L03Rik	3.0418	3.0418	3.0418	3.0418	3.0418	3.0418	3.0418	3.0418	3.0418	3.0418	3.0418	3.0418	3.0418	3.0418	3.0418	3.0418	3.0418	3.0418	3.0418	3.0418	3.0418	3.0418	3.0418	3.0418	3.0418	3.0418	3.0418	3.0418	3.0418	3.0418	3.0418	3.0418	3.0418	3.0418	3.0418	3.0418	3.0418	3.0418	3.0418	3.0418	3.0418	3.0418	3.0418	3.0418	3.0418	3.0418	3.0418	3.0418	3.0418
4930515L19Rik	3.66036	3.0418	3.0418	3.0418	3.0418	3.0418	3.0418	3.0418	3.0418	3.0418	3.0418	3.0418	3.0418	3.45428	3.0418	3.0418	3.0418	3.0418	3.46464	3.45895	3.37344	3.0418	3.0418	3.0418	3.0418	3.0418	3.0418	3.0418	3.0418	3.0418	3.0418	3.0418	3.0418	3.0418	3.0418	3.0418	3.0418	3.0418	3.0418	3.0418	3.0418	3.0418	3.0418	3.0418	3.0418	3.0418	3.0418	3.0418	3.0418
4930517E11Rik	3.0418	3.0418	3.0418	3.0418	3.0418	3.0418	3.0418	3.0418	3.0418	3.0418	3.0418	3.0418	3.0418	3.0418	3.0418	3.0418	3.0418	3.0418	3.0418	3.0418	3.0418	3.0418	3.0418	3.0418	3.0418	3.0418	3.0418	3.0418	3.0418	3.0418	3.0418	3.0418	3.0418	3.0418	3.0418	3.0418	3.0418	3.0418	3.0418	3.0418	3.0418	3.0418	3.0418	3.0418	3.0418	3.0418	3.0418	3.0418	3.0418
4930518P08Rik	3.0418	3.0418	3.0418	3.0418	3.0418	3.0418	3.0418	3.0418	3.0418	3.0418	3.0418	3.0418	3.0418	3.0418	3.0418	3.0418	3.0418	3.0418	3.0418	3.0418	3.0418	3.0418	3.0418	3.0418	3.0418	3.0418	3.0418	3.0418	3.0418	3.0418	3.0418	3.0418	3.0418	3.0418	3.0418	3.0418	3.0418	3.0418	3.0418	3.0418	3.0418	3.0418	3.0418	3.0418	3.0418	3.0418	3.0418	3.0418	3.0418
4930519D14Rik	3.0418	3.0418	3.0418	3.0418	3.0418	3.0418	3.0418	3.0418	3.0418	3.0418	3.0418	3.0418	3.0418	3.0418	3.0418	3.0418	3.0418	3.0418	3.0418	3.0418	3.0418	3.0418	3.0418	3.0418	3.0418	3.0418	3.0418	3.0418	3.0418	3.53725	3.0418	3.45123	3.74308	3.0418	3.0418	3.0418	3.0418	3.54267	3.0418	3.0418	3.0418	3.0418	3.0418	3.0418	3.0418	3.0418	3.64758	3.0418	3.45704
4930519F09Rik	3.48085	3.0418	3.0418	3.0418	3.84881	3.95709	3.90379	3.97733	3.71809	4.0996	3.98009	4.02925	3.69544	3.85862	3.88511	3.64038	3.0418	3.6791	3.97436	3.62972	3.37344	4.02447	3.53713	3.57317	3.66641	3.60516	3.65069	3.93875	3.92661	3.73911	3.0418	3.45123	3.0418	3.54972	3.57419	3.79319	3.72407	3.0418	3.91006	3.0418	3.0418	4.13403	3.62738	3.92015	3.0418	3.71203	3.0418	3.0418	4.04227
4930519F16Rik	3.0418	3.0418	3.0418	3.0418	3.0418	3.0418	3.0418	3.0418	3.0418	3.34126	3.0418	3.0418	3.0418	3.0418	3.0418	3.0418	3.0418	3.0418	3.46464	3.0418	3.37344	3.0418	3.0418	3.0418	3.0418	3.0418	3.34794	3.30456	3.0418	3.0418	3.0418	3.0418	3.0418	3.0418	3.0418	3.0418	3.0418	3.0418	3.0418	3.53069	3.0418	3.0418	3.0418	3.0418	3.0418	3.0418	3.0418	3.0418	3.0418
4930519F24Rik	3.0418	3.0418	3.0418	3.0418	3.0418	3.0418	3.0418	3.0418	3.0418	3.0418	3.0418	3.0418	3.0418	3.0418	3.0418	3.0418	3.0418	3.0418	3.0418	3.0418	3.0418	3.0418	3.0418	3.0418	3.0418	3.0418	3.0418	3.0418	3.0418	3.0418	3.0418	3.0418	3.0418	3.0418	3.0418	3.0418	3.0418	3.0418	3.0418	3.0418	3.0418	3.0418	3.0418	3.0418	3.0418	3.0418	3.0418	3.0418	3.0418
4930519G04Rik	3.0418	3.0418	3.0418	3.48967	3.0418	3.0418	3.0418	3.0418	3.0418	3.0418	3.0418	3.0418	3.0418	3.0418	3.0418	3.0418	3.0418	3.0418	3.0418	3.0418	3.0418	3.0418	3.0418	3.0418	3.0418	3.0418	3.0418	3.0418	3.0418	3.0418	3.0418	3.0418	3.0418	3.0418	3.0418	3.0418	3.0418	3.0418	3.0418	3.0418	3.0418	3.0418	3.0418	3.0418	3.0418	3.0418	3.64758	3.0418	3.0418
4930519H02Rik	3.0418	3.0418	3.0418	3.0418	3.0418	3.0418	3.0418	3.0418	3.0418	3.0418	3.0418	3.0418	3.0418	3.0418	3.0418	3.31103	3.0418	3.0418	3.0418	3.0418	3.0418	3.0418	3.0418	3.0418	3.0418	3.0418	3.0418	3.0418	3.0418	3.0418	3.0418	3.0418	3.0418	3.0418	3.0418	3.0418	3.0418	3.0418	3.0418	3.0418	3.0418	3.0418	3.0418	3.0418	3.0418	3.0418	3.0418	3.0418	3.0418
4930520O04Rik	4.66226	4.82371	5.07084	5.10876	5.72081	5.66901	6.0199	6.02041	5.47352	5.35059	5.87301	5.70485	5.87613	6.00482	5.8395	5.64986	6.1969	6.19048	5.84107	5.82976	5.62011	5.69177	6.0319	5.68098	5.7229	5.58878	5.76295	5.59119	6.27391	5.76705	5.02149	5.71624	6.15138	5.43509	5.68505	5.91359	5.78849	5.94222	6.57082	6.46377	6.49979	6.4089	5.90792	6.25634	6.13912	5.94994	6.50571	5.89173	7.42634
4930520P13Rik	3.0418	3.0418	3.0418	3.0418	3.0418	3.0418	3.0418	3.0418	3.0418	3.0418	3.0418	3.0418	3.0418	3.0418	3.0418	3.0418	3.0418	3.0418	3.0418	3.0418	3.0418	3.0418	3.0418	3.0418	3.0418	3.0418	3.0418	3.0418	3.0418	3.0418	3.0418	3.0418	3.0418	3.0418	3.0418	3.0418	3.0418	3.0418	3.0418	3.0418	3.0418	3.0418	3.0418	3.0418	3.0418	3.0418	3.0418	3.0418	3.0418
4930521E06Rik	3.0418	3.0418	3.0418	3.0418	3.0418	3.0418	3.0418	3.0418	3.0418	3.0418	3.0418	3.0418	3.0418	3.0418	3.0418	3.0418	3.0418	3.0418	3.0418	3.0418	3.0418	3.0418	3.0418	3.0418	3.0418	3.0418	3.0418	3.0418	3.0418	3.0418	3.0418	3.0418	3.0418	3.0418	3.0418	3.0418	3.0418	3.0418	3.0418	3.0418	3.0418	3.0418	3.0418	3.0418	3.0418	3.0418	3.0418	3.0418	3.0418
4930522H14Rik	3.0418	3.0418	3.5089	3.0418	3.0418	3.0418	3.0418	3.0418	3.0418	3.0418	3.0418	3.0418	3.0418	3.0418	3.0418	3.0418	3.0418	3.0418	3.0418	3.45895	3.0418	3.35796	3.0418	3.0418	3.0418	3.44142	3.0418	3.0418	3.0418	3.0418	3.0418	3.0418	3.0418	3.0418	3.0418	3.0418	3.0418	3.0418	3.0418	3.72997	3.0418	3.0418	3.0418	3.0418	3.0418	3.0418	3.0418	3.0418	3.0418
4930522O17Rik	3.0418	3.0418	3.0418	3.0418	3.0418	3.0418	3.0418	3.0418	3.0418	3.0418	3.0418	3.0418	3.0418	3.0418	3.0418	3.0418	3.0418	3.0418	3.0418	3.0418	3.0418	3.0418	3.0418	3.0418	3.0418	3.44142	3.0418	3.0418	3.0418	3.0418	3.0418	3.0418	3.0418	3.0418	3.0418	3.0418	3.0418	3.0418	3.0418	3.0418	3.0418	3.0418	3.0418	3.0418	3.0418	3.0418	3.0418	3.0418	3.0418
4930523C07Rik	9.48186	9.5383	9.63144	9.65323	10.084	10.1122	9.91709	9.88989	9.78501	9.81639	10.0412	10.1936	10.2131	10.1839	9.96882	9.91946	9.83875	9.6696	9.17973	8.99624	10.2294	10.0802	10.3064	10.3801	10.2675	10.1961	9.73153	9.79263	9.45182	9.48516	12.1751	10.5321	10.466	10.8056	10.5519	10.2514	9.01669	10.1578	9.87526	10.0009	10.1494	10.2808	10.6742	10.1631	10.077	10.1504	10.0301	10.1261	9.2845
4930523O13Rik	3.48085	3.0418	3.0418	3.48967	3.0418	3.0418	3.0418	3.46602	3.0418	3.0418	3.0418	3.0418	3.0418	3.0418	3.0418	3.0418	3.0418	3.0418	3.46464	3.0418	3.0418	3.0418	3.0418	3.0418	3.0418	3.0418	3.0418	3.41288	3.0418	3.0418	3.0418	3.0418	3.0418	3.0418	3.0418	3.0418	3.43815	3.0418	3.0418	3.53069	3.0418	3.0418	3.45728	3.0418	3.0418	3.0418	3.0418	3.0418	3.0418
4930524B15Rik	3.0418	3.0418	3.0418	3.0418	3.0418	3.39271	3.0418	3.46602	3.0418	3.0418	3.0418	3.37666	3.0418	3.45428	3.0418	3.0418	3.0418	3.0418	3.0418	3.62972	3.0418	3.35796	3.53713	3.0418	3.0418	3.0418	3.34794	3.30456	3.55793	3.0418	4.19703	3.0418	3.0418	3.40188	3.0418	3.0418	3.0418	3.54267	3.43477	3.0418	3.42345	3.0418	3.0418	3.0418	3.42512	3.43106	3.0418	3.0418	3.45704
4930524C18Rik	3.0418	3.0418	3.0418	3.0418	3.0418	3.0418	3.0418	3.0418	3.0418	3.0418	3.0418	3.0418	3.0418	3.0418	3.0418	3.0418	3.0418	3.0418	3.0418	3.0418	3.0418	3.0418	3.0418	3.0418	3.0418	3.0418	3.0418	3.0418	3.0418	3.0418	3.0418	3.45123	3.0418	3.40188	3.0418	3.0418	3.0418	3.0418	3.0418	3.0418	3.0418	3.0418	3.0418	3.0418	3.0418	3.0418	3.0418	3.0418	3.0418
4930524N10Rik	3.0418	3.0418	3.0418	3.0418	3.0418	3.0418	3.0418	3.0418	3.0418	3.0418	3.0418	3.0418	3.0418	3.0418	3.0418	3.0418	3.0418	3.0418	3.0418	3.0418	3.0418	3.0418	3.0418	3.0418	3.0418	3.0418	3.0418	3.0418	3.0418	3.0418	3.0418	3.0418	3.0418	3.0418	3.0418	3.0418	3.0418	3.0418	3.0418	3.0418	3.0418	3.0418	3.0418	3.0418	3.0418	3.0418	3.0418	3.0418	3.0418
4930524O05Rik	3.0418	3.0418	3.0418	3.0418	3.0418	3.0418	3.0418	3.0418	3.0418	3.0418	3.0418	3.0418	3.0418	3.0418	3.0418	3.0418	3.0418	3.0418	3.0418	3.0418	3.0418	3.0418	3.0418	3.0418	3.0418	3.0418	3.0418	3.0418	3.0418	3.0418	3.0418	3.0418	3.0418	3.0418	3.0418	3.0418	3.0418	3.0418	3.0418	3.0418	3.0418	3.0418	3.45728	3.55409	3.0418	3.0418	3.0418	3.0418	3.0418
4930524O08Rik	3.0418	3.0418	3.0418	3.0418	3.0418	3.0418	3.0418	3.0418	3.0418	3.0418	3.0418	3.0418	3.0418	3.0418	3.0418	3.0418	3.0418	3.0418	3.0418	3.0418	3.0418	3.0418	3.0418	3.0418	3.0418	3.0418	3.0418	3.0418	3.0418	3.0418	3.0418	3.0418	3.5401	3.0418	3.0418	3.0418	3.0418	3.0418	3.0418	3.0418	3.0418	3.0418	3.0418	3.55409	3.0418	3.0418	3.64758	3.0418	3.0418
4930525D18Rik	3.0418	3.0418	3.0418	3.0418	3.0418	3.53686	3.0418	3.0418	3.34646	3.46455	3.0418	3.37666	3.37071	3.0418	3.0418	3.57794	3.0418	3.44682	3.0418	3.45895	3.37344	3.58724	3.0418	3.0418	3.40429	3.0418	3.47394	3.30456	3.92661	3.53725	3.63087	3.45123	3.5401	3.0418	3.57419	3.65758	3.72407	3.0418	3.91006	3.53069	3.57998	3.53954	3.45728	3.0418	3.0418	3.43106	3.89244	3.51157	3.95803
4930525G20Rik	4.32166	3.78741	4.32591	4.20014	4.448	4.54594	4.66734	4.14142	4.36041	4.53332	4.61642	4.41343	4.58237	4.30945	4.69574	4.54499	4.06085	4.39885	4.33953	4.04673	4.43571	4.68642	4.47538	4.40441	4.59157	4.14837	4.42662	4.1881	4.27493	4.4757	4.72433	3.61891	3.74308	4.10089	3.0418	4.44138	5.26585	4.56231	4.6719	4.45796	4.03476	4.40529	4.53429	4.52109	4.47154	3.71203	4.85071	4.76498	3.75618
4930525M21Rik	3.0418	3.0418	3.0418	3.0418	3.0418	3.0418	3.0418	3.0418	3.0418	3.0418	3.0418	3.0418	3.0418	3.0418	3.0418	3.0418	3.0418	3.0418	3.0418	3.0418	3.0418	3.0418	3.0418	3.0418	3.0418	3.0418	3.0418	3.0418	3.0418	3.0418	3.0418	3.0418	3.0418	3.0418	3.0418	3.0418	3.43815	3.0418	3.0418	3.0418	3.0418	3.0418	3.0418	3.0418	3.0418	3.0418	3.64758	3.0418	3.0418
4930526I15Rik	6.52079	6.71473	7.04191	6.81598	7.37749	7.2067	6.95345	6.74039	7.00825	7.20016	7.5506	7.34979	7.0727	7.07957	7.12911	7.01097	7.6067	7.35783	7.03757	7.22044	7.78892	7.76468	7.04039	7.23334	6.80773	7.15518	6.99125	7.08398	6.27391	7.44286	7.40262	6.37667	6.17165	6.46615	6.0042	6.69206	6.47388	6.85982	6.31388	7.0492	7.06213	7.08491	6.50278	6.75735	7.20545	7.15645	7.24391	7.26988	7.38534
4930526L06Rik	3.0418	3.0418	3.0418	3.0418	3.0418	3.0418	3.0418	3.0418	3.0418	3.0418	3.0418	3.0418	3.0418	3.0418	3.0418	3.31103	3.40864	3.0418	3.0418	3.0418	3.37344	3.0418	3.0418	3.0418	3.40429	3.0418	3.0418	3.30456	3.0418	3.0418	3.0418	3.0418	3.0418	3.0418	3.0418	3.0418	3.0418	3.0418	3.0418	3.0418	3.42345	3.53954	3.0418	3.0418	3.0418	3.0418	3.0418	3.0418	3.0418
4930527F14Rik	3.0418	3.0418	3.0418	3.0418	3.0418	3.0418	3.0418	3.0418	3.0418	3.0418	3.0418	3.0418	3.0418	3.0418	3.0418	3.0418	3.0418	3.0418	3.0418	3.0418	3.0418	3.0418	3.0418	3.0418	3.0418	3.0418	3.0418	3.0418	3.0418	3.0418	3.0418	3.0418	3.0418	3.40188	3.0418	3.0418	3.0418	3.0418	3.0418	3.0418	3.0418	3.0418	3.0418	3.0418	3.0418	3.0418	3.0418	3.0418	3.0418
4930527G23Rik	3.0418	3.0418	3.5089	3.0418	3.0418	3.0418	3.0418	3.0418	3.0418	3.0418	3.0418	3.0418	3.0418	3.0418	3.39016	3.31103	3.0418	3.32866	3.0418	3.0418	3.0418	3.0418	3.0418	3.0418	3.0418	3.0418	3.0418	3.0418	3.0418	3.0418	3.0418	3.0418	3.0418	3.0418	3.0418	3.0418	3.0418	3.0418	3.0418	3.0418	3.0418	3.0418	3.0418	3.0418	3.0418	3.0418	3.0418	3.0418	3.45704
4930528A17Rik	4.66226	4.54264	4.39865	5.17782	4.22133	3.95709	3.83058	4.06321	4.07678	3.87854	3.98009	4.08052	3.95861	3.9521	4.12076	3.92228	4.06085	4.16272	3.63768	3.75942	3.77702	3.86859	3.89162	4.02253	3.76121	4.07992	4.16112	4.00813	4.17288	4.12918	5.02149	4.30057	4.23421	4.43148	4.65032	4.24734	4.3184	4.24011	4.45902	4.38246	4.55028	4.40529	4.31816	3.92015	4.03899	3.71203	4.76774	4.07468	4.25569
4930528D03Rik	3.0418	3.0418	3.0418	3.0418	3.0418	3.0418	3.0418	3.0418	3.0418	3.0418	3.0418	3.0418	3.0418	3.0418	3.0418	3.0418	3.0418	3.0418	3.0418	3.0418	3.0418	3.0418	3.0418	3.0418	3.0418	3.0418	3.0418	3.0418	3.0418	3.0418	3.0418	3.0418	3.5401	3.0418	3.79057	3.0418	3.0418	3.0418	3.0418	3.0418	3.0418	3.53954	3.0418	3.0418	3.0418	3.0418	3.0418	3.70328	3.45704
4930528P14Rik	3.0418	3.0418	3.0418	3.0418	3.0418	3.0418	3.0418	3.0418	3.0418	3.0418	3.0418	3.0418	3.0418	3.45428	3.0418	3.0418	3.0418	3.0418	3.0418	3.0418	3.0418	3.0418	3.0418	3.0418	3.0418	3.0418	3.34794	3.0418	3.0418	3.0418	3.0418	3.0418	3.0418	3.0418	3.0418	3.0418	3.0418	3.0418	3.0418	3.0418	3.0418	3.0418	3.0418	3.0418	3.0418	3.0418	3.0418	3.0418	3.45704
4930529C04Rik	3.0418	3.0418	3.0418	3.0418	3.40646	3.0418	3.39806	3.46602	3.47186	3.0418	3.71101	3.51431	3.77107	3.7515	3.0418	3.42199	3.0418	3.32866	3.0418	3.0418	3.0418	3.0418	3.0418	3.0418	3.0418	3.0418	3.57008	3.0418	3.0418	3.0418	3.0418	3.0418	3.74308	3.40188	3.0418	3.47886	3.0418	3.0418	3.0418	3.0418	3.0418	3.53954	3.0418	3.0418	3.42512	3.0418	3.64758	3.51157	3.0418
4930529K09Rik	3.0418	3.0418	3.0418	3.0418	3.0418	3.0418	3.0418	3.0418	3.0418	3.0418	3.0418	3.0418	3.0418	3.0418	3.0418	3.0418	3.0418	3.0418	3.0418	3.0418	3.0418	3.0418	3.0418	3.0418	3.0418	3.0418	3.0418	3.0418	3.0418	3.0418	3.0418	3.0418	3.0418	3.0418	3.0418	3.0418	3.43815	3.0418	3.0418	3.0418	3.0418	3.0418	3.0418	3.0418	3.0418	3.0418	3.0418	3.51157	3.0418
4930529L06Rik	3.66036	3.65281	3.5089	3.81149	3.40646	3.0418	3.39806	3.0418	3.0418	3.0418	3.0418	3.37666	3.0418	3.0418	3.0418	3.0418	3.0418	3.0418	3.46464	3.0418	3.37344	3.0418	3.0418	3.0418	3.40429	3.0418	3.0418	3.0418	3.76793	3.0418	3.0418	3.0418	3.0418	3.0418	3.57419	3.0418	3.43815	3.0418	3.43477	3.0418	3.9636	3.53954	3.95855	3.0418	3.0418	3.0418	3.64758	3.0418	3.0418
4930529M08Rik	3.0418	3.0418	3.0418	3.0418	3.0418	3.0418	3.0418	3.0418	3.0418	3.0418	3.0418	3.0418	3.0418	3.0418	3.0418	3.0418	3.0418	3.0418	3.0418	3.0418	3.0418	3.0418	3.0418	3.0418	3.0418	3.0418	3.47394	3.0418	3.0418	3.0418	3.0418	3.0418	3.0418	3.0418	3.57419	3.0418	3.0418	3.0418	3.0418	3.0418	3.42345	3.0418	3.75658	3.0418	3.0418	3.0418	3.0418	3.0418	3.0418
4930532M18Rik	3.0418	3.0418	3.0418	3.0418	3.0418	3.0418	3.0418	3.0418	3.0418	3.0418	3.0418	3.0418	3.0418	3.0418	3.0418	3.0418	3.0418	3.0418	3.0418	3.45895	3.0418	3.0418	3.0418	3.0418	3.0418	3.0418	3.0418	3.0418	3.0418	3.0418	3.0418	3.0418	3.0418	3.0418	3.0418	3.0418	3.0418	3.0418	3.0418	3.0418	3.0418	3.0418	3.0418	3.0418	3.0418	3.0418	3.0418	3.0418	3.0418
4930533B01Rik	3.0418	3.0418	3.0418	3.0418	3.0418	3.0418	3.0418	3.0418	3.0418	3.0418	3.0418	3.0418	3.0418	3.0418	3.0418	3.0418	3.0418	3.0418	3.0418	3.0418	3.0418	3.0418	3.0418	3.0418	3.0418	3.0418	3.0418	3.0418	3.0418	3.0418	3.0418	3.0418	3.0418	3.0418	3.0418	3.0418	3.0418	3.0418	3.0418	3.0418	3.0418	3.0418	3.0418	3.0418	3.0418	3.0418	3.0418	3.0418	3.0418
4930533P14Rik	3.0418	3.0418	3.0418	3.0418	3.0418	3.0418	3.0418	3.0418	3.0418	3.0418	3.0418	3.0418	3.0418	3.0418	3.0418	3.0418	3.0418	3.0418	3.0418	3.0418	3.0418	3.0418	3.0418	3.0418	3.0418	3.0418	3.0418	3.0418	3.0418	3.0418	3.0418	3.0418	3.0418	3.0418	3.0418	3.0418	3.43815	3.0418	3.0418	3.0418	3.0418	3.0418	3.0418	3.0418	3.0418	3.0418	3.0418	3.0418	3.0418
4930538K18Rik	3.0418	3.0418	3.69955	3.0418	3.76545	3.39271	3.74903	3.97733	3.0418	3.46455	3.0418	3.61924	3.37071	3.0418	3.0418	3.42199	3.40864	3.44682	3.0418	3.0418	3.61373	3.48803	3.0418	3.0418	3.0418	3.0418	3.57008	3.41288	3.76793	3.0418	4.54259	3.85269	3.89661	3.9128	3.57419	3.79319	3.43815	3.54267	3.59585	4.00621	3.69906	3.89567	3.0418	3.55409	3.42512	3.43106	3.64758	3.0418	3.45704
4930539C22Rik	3.0418	3.0418	3.0418	3.0418	3.0418	3.0418	3.0418	3.0418	3.0418	3.0418	3.0418	3.0418	3.0418	3.0418	3.0418	3.0418	3.0418	3.0418	3.0418	3.0418	3.0418	3.0418	3.0418	3.0418	3.0418	3.0418	3.0418	3.0418	3.0418	3.0418	3.0418	3.0418	3.0418	3.0418	3.0418	3.0418	3.0418	3.0418	3.0418	3.0418	3.0418	3.0418	3.0418	3.0418	3.0418	3.0418	3.0418	3.0418	3.0418
4930539E08Rik	4.84357	4.59446	4.46671	4.2757	4.48802	4.70674	4.7297	4.51237	5.35707	5.19771	4.34725	4.82467	4.66722	4.42228	5.12039	5.06281	5.47198	5.42576	4.78375	4.91497	5.73396	5.96898	4.61378	5.12359	4.75632	4.94493	5.29684	5.05902	4.67426	5.25686	4.80564	4.7338	4.40673	4.99435	4.40689	4.60569	4.86568	4.8672	4.45902	5.26985	5.17135	5.00822	5.72835	4.78972	4.9369	5.62879	4.53066	4.91031	4.90737
4930539J05Rik	7.82996	7.81587	7.86964	7.84915	6.82269	6.86729	6.95934	6.69086	7.07313	6.85285	6.86925	7.10944	7.10923	7.02031	7.10901	6.83958	7.25801	7.42535	7.46267	7.16558	6.99315	7.09889	6.89281	6.61013	7.09489	7.1159	7.19256	6.91342	6.71852	7.92919	7.1281	7.45671	7.08779	7.11051	7.02802	7.47824	6.68298	7.33476	6.81233	7.62596	7.56108	7.12653	6.73625	7.38515	7.4811	7.45882	7.14944	7.49843	8.22856
4930539M17Rik	3.0418	3.47545	3.0418	3.0418	3.0418	3.0418	3.0418	3.0418	3.0418	3.0418	3.0418	3.0418	3.0418	3.0418	3.0418	3.0418	3.0418	3.0418	3.46464	3.0418	3.0418	3.0418	3.0418	3.0418	3.0418	3.0418	3.34794	3.0418	3.0418	3.0418	3.0418	3.0418	3.0418	3.0418	3.0418	3.0418	3.0418	3.0418	3.0418	3.0418	3.0418	3.0418	3.0418	3.0418	3.0418	3.0418	3.0418	3.0418	3.0418
4930539N22Rik	3.0418	3.0418	3.0418	3.0418	3.0418	3.0418	3.0418	3.0418	3.0418	3.0418	3.0418	3.0418	3.0418	3.0418	3.0418	3.0418	3.0418	3.0418	3.0418	3.0418	3.0418	3.0418	3.0418	3.0418	3.0418	3.0418	3.0418	3.0418	3.0418	3.0418	3.0418	3.0418	3.5401	3.0418	3.0418	3.0418	3.0418	3.0418	3.91006	3.0418	3.0418	3.0418	3.0418	3.0418	3.0418	3.0418	3.0418	3.0418	3.0418
4930540M03Rik	3.0418	3.0418	3.0418	3.0418	3.0418	3.0418	3.0418	3.0418	3.0418	3.0418	3.0418	3.0418	3.0418	3.0418	3.0418	3.0418	3.0418	3.0418	3.0418	3.0418	3.0418	3.0418	3.0418	3.0418	3.0418	3.0418	3.0418	3.0418	3.0418	3.0418	3.0418	3.0418	3.0418	3.0418	3.0418	3.0418	3.0418	3.0418	3.43477	3.0418	3.0418	3.0418	3.0418	3.0418	3.0418	3.0418	3.0418	3.0418	3.0418
4930542C21Rik	3.0418	3.0418	3.0418	3.0418	3.0418	3.0418	3.0418	3.0418	3.0418	3.0418	3.0418	3.0418	3.0418	3.0418	3.0418	3.0418	3.0418	3.0418	3.0418	3.0418	3.0418	3.0418	3.0418	3.0418	3.0418	3.0418	3.0418	3.0418	3.0418	3.0418	3.0418	3.45123	3.0418	3.0418	3.57419	3.0418	3.0418	3.0418	3.0418	3.0418	3.0418	3.0418	3.0418	3.0418	3.0418	3.0418	3.0418	3.0418	3.0418
4930542D17Rik	3.0418	3.0418	3.0418	3.0418	3.0418	3.0418	3.0418	3.0418	3.0418	3.0418	3.0418	3.0418	3.0418	3.0418	3.0418	3.0418	3.0418	3.0418	3.0418	3.0418	3.0418	3.0418	3.0418	3.0418	3.0418	3.0418	3.0418	3.0418	3.0418	3.0418	3.0418	3.0418	3.0418	3.0418	3.57419	3.0418	3.0418	3.0418	3.43477	3.0418	3.0418	3.0418	3.0418	3.0418	3.0418	3.0418	3.0418	3.0418	3.0418
4930543E12Rik	3.0418	3.47545	3.0418	3.0418	3.0418	3.0418	3.0418	3.0418	3.0418	3.0418	3.0418	3.0418	3.0418	3.0418	3.0418	3.0418	3.0418	3.32866	3.0418	3.0418	3.0418	3.0418	3.0418	3.0418	3.0418	3.0418	3.34794	3.0418	3.0418	3.0418	3.0418	3.0418	3.0418	3.0418	3.0418	3.0418	3.0418	3.0418	3.0418	3.53069	3.0418	3.0418	3.95855	3.0418	3.0418	3.0418	3.47172	3.0418	3.75618
4930544D05Rik	3.66036	3.65281	3.96428	3.0418	3.92362	3.53686	3.54436	3.0418	3.64778	3.34126	3.0418	3.37666	3.50595	3.7515	3.53327	3.42199	3.40864	3.53704	3.46464	3.0418	3.50979	3.6704	3.0418	3.0418	3.40429	3.44142	3.72133	3.41288	3.0418	3.0418	4.19703	3.45123	3.89661	3.0418	3.57419	3.0418	3.82725	3.0418	3.43477	3.0418	3.69906	3.0418	3.0418	3.0418	3.58233	3.0418	3.64758	3.51157	3.45704
4930544G11Rik	3.0418	3.0418	3.0418	3.0418	3.0418	3.0418	3.0418	3.0418	3.0418	3.0418	3.0418	3.0418	3.0418	3.0418	3.0418	3.0418	3.0418	3.0418	3.0418	3.0418	3.0418	3.0418	3.0418	3.0418	3.0418	3.0418	3.0418	3.0418	3.0418	3.73911	3.63087	3.0418	3.0418	3.0418	3.0418	3.47886	3.43815	3.0418	3.0418	3.0418	3.42345	3.7423	3.0418	3.0418	3.0418	3.0418	3.47172	3.51157	3.0418
4930544M13Rik	3.0418	3.0418	3.0418	3.0418	3.0418	3.0418	3.0418	3.46602	3.0418	3.34126	3.0418	3.0418	3.0418	3.0418	3.0418	3.31103	3.0418	3.0418	3.46464	3.0418	3.0418	3.0418	3.0418	3.0418	3.0418	3.0418	3.34794	3.0418	3.0418	3.0418	3.0418	3.0418	3.0418	3.0418	3.0418	3.0418	3.0418	3.0418	3.0418	3.0418	3.0418	3.53954	3.0418	3.0418	3.0418	3.0418	3.0418	3.0418	3.0418
4930545E07Rik	3.0418	3.0418	3.0418	3.0418	3.0418	3.0418	3.0418	3.0418	3.0418	3.0418	3.0418	3.0418	3.0418	3.0418	3.0418	3.0418	3.0418	3.0418	3.0418	3.0418	3.0418	3.0418	3.0418	3.0418	3.0418	3.0418	3.0418	3.0418	3.0418	3.0418	3.0418	3.0418	3.0418	3.0418	3.0418	3.0418	3.0418	3.0418	3.0418	3.0418	3.0418	3.0418	3.0418	3.0418	3.0418	3.0418	3.0418	3.0418	3.45704
4930545H06Rik	3.0418	3.0418	3.0418	3.0418	3.0418	3.0418	3.0418	3.0418	3.0418	3.0418	3.0418	3.0418	3.0418	3.0418	3.0418	3.0418	3.0418	3.0418	3.0418	3.0418	3.0418	3.0418	3.0418	3.0418	3.0418	3.0418	3.0418	3.0418	3.0418	3.53725	3.0418	3.0418	3.0418	3.0418	3.0418	3.0418	3.0418	3.0418	3.0418	3.0418	3.0418	3.0418	3.0418	3.0418	3.42512	3.0418	3.0418	3.0418	3.0418
4930545L23Rik	3.0418	3.0418	3.0418	3.0418	3.0418	3.0418	3.0418	3.0418	3.0418	3.0418	3.0418	3.0418	3.0418	3.0418	3.0418	3.0418	3.0418	3.0418	3.0418	3.0418	3.0418	3.0418	3.0418	3.0418	3.0418	3.0418	3.0418	3.0418	3.0418	3.0418	3.0418	3.0418	3.0418	3.0418	3.57419	3.0418	3.0418	3.0418	3.0418	3.0418	3.0418	3.0418	3.0418	3.0418	3.0418	3.0418	3.0418	3.0418	3.0418
4930546C10Rik	3.0418	3.0418	3.0418	3.0418	3.0418	3.0418	3.0418	3.0418	3.0418	3.0418	3.0418	3.0418	3.0418	3.0418	3.0418	3.0418	3.0418	3.0418	3.0418	3.0418	3.0418	3.0418	3.0418	3.0418	3.0418	3.0418	3.0418	3.0418	3.0418	3.0418	4.19703	3.45123	3.0418	3.0418	3.0418	3.0418	3.0418	3.0418	3.43477	3.0418	3.0418	3.0418	3.0418	3.0418	3.0418	3.0418	3.64758	3.0418	3.0418
4930546K05Rik	3.66036	3.78741	3.0418	3.0418	3.0418	3.0418	3.0418	3.0418	3.0418	3.0418	3.0418	3.0418	3.0418	3.0418	3.0418	3.31103	3.0418	3.0418	3.0418	3.0418	3.0418	3.0418	3.0418	3.0418	3.0418	3.0418	3.0418	3.41288	3.0418	3.0418	3.0418	3.0418	3.0418	3.0418	3.0418	3.0418	4.13968	3.0418	3.0418	3.88077	3.42345	3.0418	3.45728	3.0418	3.58233	3.0418	3.0418	3.51157	3.0418
4930547E08Rik	3.0418	3.0418	3.0418	3.0418	3.0418	3.0418	3.0418	3.0418	3.0418	3.0418	3.0418	3.0418	3.0418	3.0418	3.0418	3.0418	3.0418	3.0418	3.0418	3.0418	3.0418	3.0418	3.0418	3.0418	3.0418	3.0418	3.0418	3.0418	3.0418	3.73911	3.0418	3.0418	3.0418	3.66229	3.95391	3.47886	3.43815	3.54267	3.43477	3.0418	3.0418	3.0418	3.0418	3.0418	3.0418	3.0418	3.0418	3.51157	3.45704
4930547E14Rik	3.48085	3.47545	3.5089	3.48967	3.0418	3.0418	3.0418	3.46602	3.0418	3.0418	3.0418	3.0418	3.0418	3.0418	3.0418	3.0418	3.0418	3.0418	3.0418	3.45895	3.0418	3.0418	3.0418	3.41859	3.0418	3.0418	3.0418	3.0418	3.0418	3.53725	3.0418	3.0418	3.0418	3.0418	3.0418	3.47886	3.0418	3.0418	3.0418	3.0418	3.42345	3.53954	3.0418	3.55409	3.0418	3.0418	3.0418	3.0418	3.45704
4930548G14Rik	3.0418	3.0418	3.0418	3.0418	3.0418	3.0418	3.0418	3.0418	3.0418	3.0418	3.0418	3.0418	3.0418	3.0418	3.0418	3.0418	3.0418	3.0418	3.0418	3.0418	3.0418	3.0418	3.0418	3.0418	3.0418	3.0418	3.0418	3.0418	3.0418	3.0418	3.0418	3.0418	3.0418	3.0418	3.0418	3.0418	3.0418	3.0418	3.0418	3.0418	3.0418	3.0418	3.0418	3.0418	3.0418	3.0418	3.0418	3.0418	3.0418
4930548H24Rik	3.66036	3.47545	3.5089	3.92718	3.99191	4.01804	4.14424	4.28064	3.98985	3.76892	3.0418	3.9163	4.11044	4.24802	4.12076	3.92228	4.17556	3.89146	4.05998	3.86768	3.966	4.11432	3.53713	3.78914	4.35579	4.14837	4.12223	3.77799	4.05841	3.73911	3.0418	3.74631	3.5401	4.10089	4.08947	4.00486	4.07172	3.74667	4.06324	4.21267	3.69906	4.13403	3.62738	4.16478	3.80188	4.34915	3.89244	3.70328	3.75618
4930548J01Rik	3.0418	3.0418	3.0418	3.0418	3.0418	3.0418	3.0418	3.0418	3.0418	3.0418	3.0418	3.0418	3.0418	3.0418	3.0418	3.0418	3.0418	3.0418	3.0418	3.0418	3.37344	3.0418	3.0418	3.0418	3.0418	3.0418	3.0418	3.0418	3.0418	3.0418	3.0418	3.0418	3.0418	3.0418	3.0418	3.0418	3.0418	3.0418	3.0418	3.0418	3.0418	3.0418	3.0418	3.0418	3.0418	3.0418	3.0418	3.0418	3.0418
[truncated: 22,961 more rows]
[truncated: 205 more columns]
