# Supplementary material for: Leveraging chromatin accessibility for transcriptional regulatory network inference in T Helper 17 Cells
Source: Genome Res. 2019 Mar;29(3):449–63. doi: 10.1101/gr.238253.118 (PMC6396413; doi:10.1101/gr.238253.118)
Supplement: Supplemental Material [file supp_gr.238253.118_Supplemental_Table_S3.xlsx]

## Sheet: Table S3 Legend
Table S3. Target gene and candidate regulator lists (see Methods for more details).

## Sheet: Initial TF List
Initial TF List (2093 putative TFs)
0610010F05Rik
1700012l04rik
1700024p04rik
2210018m03rik
2310003h01rik
2610305D13Rik
2700081O15Rik
5730589k01rik
9830147E19Rik
A730012o14rik
Ab031039
Ab043583
Abl1
Abt1
Acd
Adar
Adnp
Adnp2
Aebp1
Aebp2
Af009328
Af022076
Af073955
Af245476
Af245478
Af245479
Af387631
Aff1
Aff3
Aff4
Agfg1
Ahctf1
Ahdc1
Ahr
Ahrr
Aifm1
Aifm2
Aim2
Aire
Aj010604
Ak010444
Ak010559
Ak028237
Ak050798
Ak053704
Ak054020
Ak089319
Ak132465
Ak132573
Ak134452
Ak134786
Ak143943
Ak145098
Ak145415
Ak147163
Ak147496
Ak155350
Ak155436
Ak157301
Ak158513
Ak165997
Akap8
Akap8l
Akna
Alb
Alx1
Alx3
Alx4
Ang
Ang2
Ang3
Ankrd1
Ankrd33b
Ankrd61
Ankzf1
Apex1
Apex2
Apitd1
Aplp2
App
Aptx
Ar
Arhgap35
Arid1a
Arid1b
Arid2
Arid3a
Arid3b
Arid3c
Arid4a
Arid4b
Arid5a
Arid5b
Arnt
Arnt2
Arntl
Arntl2
Arrb1
Arrb2
Arx
Ascl1
Ascl2
Ascl3
Ascl4
Ascl5
Ash1l
Ash2l
Asxl1
Asxl2
Asxl3
Atf1
Atf2
Atf3
Atf4
Atf5
Atf6
Atf6b
Atf7
Atmin
Atoh1
Atoh7
Atoh8
Atrx
Atxn1
Atxn1l
Aw822073
Ay690602
Bach1
Bach2
Banf1
Banf2
Banp
Bapx1
Barhl1
Barhl2
Barx1
Barx2
Batf
Batf2
Batf3
Baz2a
Baz2b
Bbx
Bc003762
Bc012700
Bc014293
Bc022124
Bc051387
Bc057102
Bc059241
Bc065404
Bc069183
Bc075660
Bc079651
Bc082596
Bc092057
Bc100555
Bc103511
Bc111527
Bcl11a
Bcl11b
Bcl3
Bcl6
Bcl6b
Bclaf1
Bdp1
Bhlha15
Bhlha9
Bhlhb2
Bhlhb3
Bhlhb4
Bhlhe22
Bhlhe23
Bhlhe40
Bhlhe41
Blm
Bmyc
Bnc1
Bnc2
Bptf
Brca1
Brca2
Brd4
Brf1
Brip1
Bsx
C030039L03Rik
C1d
C230052i12rik
C730049f21rik
Cacna1a
Camta1
Camta2
Capn15
Carf
Carhsp1
Casp8ap2
Casz1
Cbfb
Cbx2
Cc2d1a
Ccdc17
Ccdc79
Ccnt1
Cdc5l
Cdk9
Cdkn2a
Cdt1
Cdx1
Cdx2
Cdx4
Cebpa
Cebpb
Cebpd
Cebpe
Cebpg
Cebpz
Cenpa
Cenpb
Cenpc1
Cenpt
Cenpw
Cers2
Cers3
Cers4
Cers5
Cers6
Cggbp1
Champ1
Chchd3
Chd1
Chd1l
Chd2
Chd4
Chd5
Chd6
Chd7
Chd8
Chd9
Chrac1
Chtf18
Chtf8
Churc1
Chx10
Cic
Clec4a1
Clock
Clspn
Cnbp
Cnot4
Cpeb1
Cpsf4
Cpxcr1
Cr2
Cramp1l
Creb1
Creb3
Creb3l1
Creb3l2
Creb3l3
Creb3l4
Creb5
Crebbp
Crebl1
Crebl2
Crebrf
Crebzf
Crem
Crtc2
Crx
Crxos
Cry2
Csda
Csdc2
Csde1
Csrnp1
Csrnp2
Csrnp3
Ctbp1
Ctc1
Ctcf
Ctcfl
Ctnnb1
Cutl2
Cux1
Cux2
Cxxc1
Cxxc4
Cxxc5
D10584
D14637
D3Ertd254e
D87836
Dach1
Dach2
Dbp
Ddb1
Ddb2
Ddit3
Deaf1
Dedd
Dedd2
Dek
Dffb
Dhx36
Dhx58
Dhx9
Dlx1
Dlx2
Dlx3
Dlx4
Dlx5
Dlx6
Dmap1
Dmbx1
Dmrt1
Dmrt2
Dmrt3
Dmrta1
Dmrta2
Dmrtb1
Dmrtc1a
Dmrtc1b
Dmrtc1c
Dmrtc2
Dmtf1
Dna2
Dnajb6
Dnajc1
Dnajc2
Dnajc21
Dnmt1
Dntt
Dnttip1
Dot1l
Dpf1
Dpf3
Dr1
Drap1
Dscc1
Dtd1
Dzip1
E2f1
E2f2
E2f3
E2f4
E2f5
E2f6
E2f7
E2f8
E4f1
Eaf2
Ebf1
Ebf2
Ebf3
Ebf4
Edf1
Eea1
Eef1d
Eepd1
Egr1
Egr2
Egr3
Egr4
Ehf
Elf1
Elf2
Elf3
Elf4
Elf5
Elk1
Elk3
Elk4
Elmsan1
Eme1
Eme2
Emx1
Emx2
En1
En2
Eno1
Eno1b
Eomes
Epas1
Erf
Erg
Esr1
Esr2
Esrra
Esrrb
Esrrg
Esx1
Etohi1
Ets1
Ets2
Etv1
Etv2
Etv3
Etv3l
Etv4
Etv5
Etv6
Evi1
Evx1
Evx2
Fam170a
Fancd2
Fancm
Farsb
Fbxl19
Fbxo18
Fbxo21
Fen1
Ferd3l
Fev
Fezf1
Fezf2
Figla
Fiz1
Fkhl18
Fli1
Flywch1
Fos
Fosb
Fosl1
Fosl2
Foxa1
Foxa2
Foxa3
Foxb1
Foxb2
Foxc1
Foxc2
Foxd1
Foxd2
Foxd3
Foxd4
Foxe1
Foxe3
Foxf1
Foxf1a
Foxf2
Foxg1
Foxh1
Foxi1
Foxi2
Foxi3
Foxj1
Foxj2
Foxj3
Foxk1
Foxk2
Foxl1
Foxl2
Foxm1
Foxn1
Foxn2
Foxn3
Foxn4
Foxo1
Foxo3
Foxo4
Foxo6
Foxp1
Foxp2
Foxp3
Foxp4
Foxq1
Foxr1
Foxr2
Foxs1
Fubp1
Fubp3
Fus
G3bp1
Gabpa
Gabpb1
Gabpb2
Gata1
Gata2
Gata3
Gata4
Gata5
Gata6
Gatad1
Gatad2a
Gatad2b
Gbx1
Gbx2
Gcfc2
Gcm1
Gcm2
Gen1
Gfi1
Gfi1b
Gli1
Gli2
Gli3
Glis1
Glis2
Glis3
Glmp
Glyr1
Gm10324
Gm13051
Gm13139
Gm13154
Gm13157
Gm13212
Gm13242
Gm13247
Gm13251
Gm14305
Gm14308
Gm14325
Gm14326
Gm14391
Gm14412
Gm14420
Gm14431
Gm14434
Gm14474
Gm14484
Gm14501
Gm14543
Gm14920
Gm15753
Gm1862
Gm19428
Gm2026
Gm20541
Gm22
Gm29738
Gm29746
Gm3055
Gm30910
Gm31526
Gm31714
Gm32687
Gm33378
Gm4222
Gm4724
Gm4745
Gm4906
Gm4981
Gm5132
Gm5294
Gm5382
Gm5585
Gm5595
Gm6710
Gm7145
Gm7762
Gm8008
Gm8214
Gm8898
Gm9376
Gm98
Gmeb1
Gmeb2
Gon4l
Gpbp1
Gpbp1l1
Grhl1
Grhl2
Grhl3
Gsc
Gsc2
Gsg2
Gsh1
Gsx1
Gsx2
Gtf2a1
Gtf2a1l
Gtf2b
Gtf2e2
Gtf2f1
Gtf2f2
Gtf2i
Gtf2ird1
Gtf2ird2
Gtf3a
Gtf3c1
Gtf3c2
Gtf3c4
Gtf3c5
Gzf1
H1foo
Hand1
Hand2
Hbp1
Hdgf
Hdgfrp2
Hdx
Hells
Helt
Helz2
Hes1
Hes2
Hes3
Hes5
Hes6
Hes7
Hesx1
Hey1
Hey2
Heyl
Hhex
Hic1
Hic2
Hif1a
Hif3a
Hils1
Hinfp
Hivep1
Hivep2
Hivep3
Hjurp
Hlf
Hltf
Hlx
Hlx1
Hlxb9
Hmbox1
Hmces
Hmg20a
Hmg20b
Hmga1
Hmga1-rs1
Hmga2
Hmgb2
Hmgb3
Hmgb4
Hmgn1
Hmgn3
Hmgn5
Hmgxb3
Hmgxb4
Hmx1
Hmx2
Hmx3
Hnf1a
Hnf1b
Hnf4a
Hnf4g
Homez
Hopx
Hoxa1
Hoxa10
Hoxa11
Hoxa13
Hoxa2
Hoxa3
Hoxa4
Hoxa5
Hoxa6
Hoxa7
Hoxa9
Hoxb1
Hoxb13
Hoxb2
Hoxb3
Hoxb4
Hoxb5
Hoxb6
Hoxb7
Hoxb8
Hoxb9
Hoxc10
Hoxc11
Hoxc12
Hoxc13
Hoxc4
Hoxc5
Hoxc6
Hoxc8
Hoxc9
Hoxd1
Hoxd10
Hoxd11
Hoxd12
Hoxd13
Hoxd3
Hoxd4
Hoxd8
Hoxd9
Hp1bp3
Hr
Hsf1
Hsf2
Hsf3
Hsf4
Hsf5
Hsfy2
Htatip
Huwe1
Hypm
Id1
Id2
Id3
Id4
Ifih1
Ift57
Ighmbp2
Ikzf1
Ikzf2
Ikzf3
Ikzf4
Ikzf5
Ilf2
Ilf3
Impdh1
Impdh2
Ing2
Ing4
Ino80
Insm1
Insm2
Irf1
Irf2
Irf3
Irf4
Irf5
Irf6
Irf7
Irf8
Irf9
Irx1
Irx2
Irx3
Irx4
Irx5
Irx6
Irxl1
Isgf3g
Isl1
Isl2
Isx
Iws1
Jarid2
Jazf1
Jdp2
Jrk
Jrkl
Jun
Junb
Jund
Kat5
Kat6a
Kat6b
Kat7
Kcmf1
Kcnip3
Kdm1a
Kdm1b
Kdm2a
Kdm2b
Kdm5a
Kdm5b
Kdm5c
Kdm5d
Khsrp
Kif22
Kif4
Kin
Klf1
Klf10
Klf11
Klf12
Klf13
Klf14
Klf15
Klf16
Klf17
Klf2
Klf3
Klf4
Klf5
Klf6
Klf7
Klf8
Klf9
Kmt2a
Kmt2b
Kmt2c
Kmt2d
L38248
L3mbtl
L3mbtl1
L3mbtl3
L3mbtl4
Labx
Lbr
Lbx1
Lbx2
Lcor
Lcorl
Lef1
Lemd3
Lhx1
Lhx2
Lhx3
Lhx4
Lhx5
Lhx6
Lhx8
Lhx9
Lig1
Lig3
Lig4
Lin28a
Lin28b
Lin54
Lmo2
Lmx1a
Lmx1b
Lmyc1
Lonp1
Lrpprc
Lrrfip1
Lrrfip2
Ltf
Luc7l3
Lyar
Lyl1
M55512
Mael
Maf
Mafa
Mafb
Maff
Mafg
Mafk
Map1s
Mapk1
Max
Maz
Mb21d1
Mbd1
Mbd2
Mbd3
Mbd4
Mbd5
Mbd6
Mbnl1
Mbnl2
Mecom
Mecp2
Med1
Med26
Med6
Mef2a
Mef2b
Mef2c
Mef2d
Meiob
Meis1
Meis2
Meis3
Men1
Meox1
Meox2
Mesp1
Mesp2
Mga
Mgmt
Mier1
Mier2
Mier3
Mis18bp1
Mitf
Mixl1
Mkx
Mlf1
Mll1
Mllt7
Mlx
Mlxip
Mlxipl
Mnd1
Mnt
Mnx1
Mpg
Mrg1
Mrg2
Msantd1
Msantd3
Msantd4
Msc
Msgn1
Msh2
Msh3
Msh4
Msh5
Msh6
Msl3
Msx1
Msx2
Msx3
Mta1
Mta2
Mta3
Mterf1a
Mterf1b
Mterf2
Mterf3
Mterf4
Mtf1
Mtf2
Mus81
Mxd1
Mxd3
Mxd4
Mxi1
Myb
Mybbp1a
Mybl1
Mybl2
Myc
Mycl
Mycn
Mycs
Myef2
Myf5
Myf6
Mynn
Myod1
Myog
Mypop
Myrf
Myrfl
Mysm1
Myst1
Myst2
Myst3
Myst4
Myt1
Myt1l
Mzf1
Nabp1
Nabp2
Naca
Nacc2
Naif1
Nanog
Nat14
Ncl
Ncoa1
Ncoa2
Ncoa3
Ncor1
Ncor2
Ndn
Neil1
Neil2
Neil3
Neurod1
Neurod2
Neurod4
Neurod6
Neurog1
Neurog2
Neurog3
Nfat5
Nfatc1
Nfatc2
Nfatc3
Nfatc4
Nfe2
Nfe2l1
Nfe2l2
Nfe2l3
Nfia
Nfib
Nfic
Nfil3
Nfix
Nfkb1
Nfkb2
Nfkbia
Nfkbib
Nfkbid
Nfkbie
Nfkbil1
Nfkbiz
Nfrkb
Nfx1
Nfxl1
Nfya
Nfyb
Nfyc
Nhej1
Nhlh1
Nhlh2
Nkrf
Nkx1-1
Nkx1-2
Nkx2-1
Nkx2-2
Nkx2-3
Nkx2-4
Nkx2-5
Nkx2-6
Nkx2-9
Nkx3-1
Nkx3-2
Nkx6-1
Nkx6-2
Nkx6-3
Nme2
Nobox
Nono
Nostrin
Notch1
Noto
Npas1
Npas2
Npas3
Npas4
Npm1
Nr0b1
Nr0b2
Nr1d1
Nr1d2
Nr1h2
Nr1h3
Nr1h4
Nr1h5
Nr1i2
Nr1i3
Nr2c1
Nr2c2
Nr2e1
Nr2e3
Nr2f1
Nr2f2
Nr2f6
Nr3c1
Nr3c2
Nr4a1
Nr4a2
Nr4a3
Nr5a1
Nr5a2
Nr6a1
Nrf1
Nrip1
Nrl
Nthl1
Nupl2
Nupr1
Nusap1
Oasl1
Obfc1
Obox1
Obox3
Obox5
Obox6
Olig1
Olig2
Olig3
Onecut1
Onecut2
Onecut3
Orc1
Orc3
Orc4
Orc6
Osr1
Osr2
Otp
Otud7a
Otud7b
Otx1
Otx2
Ovol1
Ovol2
Ovol3
Pa2g4
Palb2
Papd5
Papd7
Parp1
Patz1
Pax1
Pax2
Pax3
Pax4
Pax5
Pax6
Pax7
Pax8
Pax9
Paxbp1
Pbrm1
Pbx1
Pbx2
Pbx3
Pbx4
Pcbp1
Pcbp2
Pcbp3
Pcbp4
Pcgf2
Pcgf6
Pcna
Pcx
Pdcd2
Pds5b
Pdx1
Peg10
Peg3
Pgbd1
Pgr
Phc1
Phc2
Phc3
Phf20
Phf21a
Phf5a
Phf6
Phox2a
Phox2b
Phtf1
Phtf2
Pias1
Pias2
Pias4
Pif1
Pin1
Pin4
Pitx1
Pitx2
Pitx3
Pknox1
Pknox2
Plag1
Plagl1
Plagl2
Plscr1
Pml
Pms2
Pnn
Pogk
Pogz
Polr2a
Polr3a
Pot1a
Pou1f1
Pou2af1
Pou2f1
Pou2f2
Pou2f3
Pou3f1
Pou3f2
Pou3f3
Pou3f4
Pou4f1
Pou4f2
Pou4f3
Pou5f1
Pou5f2
Pou6f1
Pou6f2
Ppara
Ppard
Pparg
Ppargc1a
Ppfibp2
Ppp1r10
Ppp1r13l
Ppp1r8
Prap1
Prdm1
Prdm10
Prdm12
Prdm13
Prdm14
Prdm15
Prdm16
Prdm2
Prdm4
Prdm5
Prdm6
Prdm8
Prdm9
Preb
Prim2
Prkdc
Prkrir
Prm1
Prm2
Prm3
Prmt3
Prop1
Prox1
Prox2
Prpf19
Prr12
Prrx1
Prrx2
Prrxl1
Psip1
Psmc3ip
Pspc1
Ptf1a
Ptges2
Puf60
Pura
Purb
Purg
Rabgef1
Rad21
Rag1
Rag2
Rara
Rarb
Rarg
Rax
Rb1
Rbak
Rbbp8
Rbck1
Rbfox3
Rbl2
Rbms1
Rbpj
Rbpjl
Rbpsuhl
Rbsn
Rc3h2
Rcc1
Rcor1
Rcor2
Rcor3
Rdm1
Recql
Rel
Rela
Relb
Repin1
Rere
Rest
Rev1
Rev3l
Rex2
Rexo4
Rfc1
Rfc2
Rfc4
Rfc5
Rfx1
Rfx2
Rfx3
Rfx4
Rfx5
Rfx6
Rfx7
Rfx8
Rfxank
Rfxap
Rhox1
Rhox10
Rhox11
Rhox12
Rhox13
Rhox2c
Rhox2d
Rhox2f
Rhox2g
Rhox2h
Rhox3c
Rhox3f
Rhox3g
Rhox3h
Rhox4b
Rhox4c
Rhox4d
Rhox4e
Rhox4f
Rhox4g
Rhox5
Rhox6
Rhox7
Rhox8
Rhox9
Rlf
Rmi2
Rnf10
Rnf113a2
Rnf141
Rnf4
Rnf6
Rnps1
Rora
Rorb
Rorc
Rpa1
Rpa2
Rpa3
Rpap1
Rpl7
Rreb1
Rtel1
Rtf1
Runx1
Runx2
Runx3
Rxra
Rxrb
Rxrg
Rybp
S82720
Safb
Safb2
Sall1
Sall2
Sall3
Sall4
Sap30
Sap30l
Sart1
Satb1
Satb2
Scmh1
Scml4
Scoc
Scrt1
Scrt2
Scx
Sebox
Setbp1
Setdb1
Setdb2
Sfpi1
Sfpq
Sgsm2
Shox2
Shprh
Sim1
Sim2
Sin3a
Sirt6
Six1
Six2
Six3
Six4
Six5
Six6
Skil
Skor1
Skor2
Smad1
Smad2
Smad3
Smad4
Smad5
Smad6
Smad7
Smad9
Smarca1
Smarca2
Smarca4
Smarca5
Smarcad1
Smarcal1
Smarcc1
Smarcc2
Smarce1
Smc1b
Smc3
Smg6
Smug1
Smyd1
Smyd3
Snai1
Snai2
Snai3
Snapc1
Snapc2
Snapc3
Snapc4
Snapc5
Sod2
Sohlh1
Sohlh2
Son
Sox1
Sox10
Sox11
Sox12
Sox13
Sox14
Sox15
Sox16
Sox17
Sox18
Sox19
Sox2
Sox21
Sox3
Sox30
Sox4
Sox5
Sox6
Sox7
Sox8
Sox9
Sp1
Sp100
Sp110
Sp140
Sp2
Sp3
Sp4
Sp5
Sp6
Sp7
Sp8
Sp9
Spata24
Spdef
Spi1
Spib
Spic
Spin1
Spo11
Spz1
Sra1
Srcap
Srebf1
Srebf2
Srf
Srrm1
Srrt
Sry
Ss18l1
Ssbp1
Ssbp2
Ssbp3
Ssbp4
Ssh1
Ssh2
Ssh3
Ssrp1
St18
Stat1
Stat2
Stat3
Stat4
Stat5a
Stat5b
Stat6
Stra13
Sub1
Suhw3
Supt6
Supv3l1
Surf6
Swap70
Swsap1
Sycp1
Sycp2
Sycp3
T
Tada2a
Tada2b
Taf1
Taf10
Taf11
Taf12
Taf13
Taf1a
Taf1b
Taf1c
Taf1d
Taf2
Taf4a
Taf4b
Taf5
Taf6
Taf8
Taf9
Tal1
Tal2
Tardbp
Tbl1x
Tbl1xr1
Tbp
Tbpl1
Tbpl2
Tbr1
Tbx1
Tbx10
Tbx15
Tbx18
Tbx19
Tbx2
Tbx20
Tbx21
Tbx22
Tbx3
Tbx4
Tbx5
Tbx6
Tcea1
Tcea2
Tcea3
Tceanc
Tceanc2
Tceb3
Tcf1
Tcf12
Tcf15
Tcf2
Tcf20
Tcf21
Tcf23
Tcf24
Tcf25
Tcf3
Tcf4
Tcf7
Tcf7l1
Tcf7l2
Tcfap2a
Tcfap2b
Tcfap2c
Tcfap2d
Tcfap2e
Tcfap4
Tcfcp2
Tcfcp2l1
Tcfe3
Tcfeb
Tcfl5
Tead1
Tead2
Tead3
Tead4
Tef
Ten1
Terf1
Terf2
Terf2ip
Tet1
Tet3
Tfam
Tfap2a
Tfap2b
Tfap2c
Tfap2d
Tfap2e
Tfap4
Tfb1m
Tfcp2
Tfcp2l1
Tfdp1
Tfdp2
Tfe3
Tfeb
Tfec
Tfip11
Tfpt
Tgif1
Tgif2
Tgif2lx1
Tgif2lx2
Thap1
Thap11
Thap2
Thap3
Thap4
Thap7
Thoc1
Thra
Thrb
Tigd2
Tigd3
Tigd4
Tigd5
Tlr8
Tlx1
Tlx2
Tlx3
Tmem18
Tmf1
Tmpo
Tnfaip3
Tnp1
Tnp2
Tonsl
Top1
Top1mt
Top2a
Top2b
Top3a
Top3b
Topbp1
Topors
Tox
Tox2
Tox3
Tox4
Trafd1
Trdmt1
Trerf1
Trim16
Trim21
Trim24
Trim27
Trim28
Trim30a
Trim33
Trnp1
Trp53
Trp53bp1
Trp63
Trp73
Trps1
Tsc22d1
Tsc22d2
Tsc22d3
Tsc22d4
Tshz1
Tshz2
Tshz3
Tsn
Tsnax
Ttc5
Ttf1
Ttf2
Tulp4
Twist1
Twist2
Txk
U36575
U57343
Ubn1
Ubp1
Ubtf
Ubtfl1
Uhrf1
Uhrf2
Uncx
Upf1
Usf1
Usf2
Utf1
Vax1
Vax2
Vdr
Vezf1
Vgll3
Vps72
Vsx1
Vsx2
Wbp7
Wdhd1
Whsc1
Wiz
Wnt5a
Wrn
Wrnip1
Wt1
Xbp1
Xpa
Xpc
Xrcc2
Xrcc3
Xrcc4
Xrcc5
Xrcc6
Xrn1
Ybx1
Ybx2
Ybx3
Yy1
Yy2
Zbed3
Zbed4
Zbed5
Zbed6
Zbp1
Zbtb1
Zbtb10
Zbtb11
Zbtb12
Zbtb14
Zbtb16
Zbtb17
Zbtb18
Zbtb2
Zbtb20
Zbtb21
Zbtb22
Zbtb24
Zbtb25
Zbtb26
Zbtb3
Zbtb32
Zbtb33
Zbtb34
Zbtb37
Zbtb38
Zbtb39
Zbtb4
Zbtb40
Zbtb41
Zbtb42
Zbtb43
Zbtb44
Zbtb45
Zbtb46
Zbtb48
Zbtb49
Zbtb5
Zbtb6
Zbtb7a
Zbtb7b
Zbtb7c
Zbtb8
Zbtb8a
Zbtb8b
Zbtb9
Zc3h12a
Zc3h4
Zc3h6
Zc3h8
Zcchc11
Zeb1
Zeb2
Zfand3
Zfand5
Zfand6
Zfat
Zfhx1b
Zfhx2
Zfhx3
Zfhx4
Zfml
Zfp1
Zfp105
Zfp11
Zfp110
Zfp111
Zfp112
Zfp113
Zfp12
Zfp120
Zfp128
Zfp13
Zfp131
Zfp14
Zfp142
Zfp143
Zfp146
Zfp148
Zfp157
Zfp160
Zfp161
Zfp169
Zfp174
Zfp180
Zfp182
Zfp184
Zfp187
Zfp189
Zfp191
Zfp192
Zfp2
Zfp202
Zfp207
Zfp212
Zfp213
Zfp217
Zfp218
Zfp219
Zfp235
Zfp236
Zfp238
Zfp239
Zfp248
Zfp251
Zfp26
Zfp260
Zfp263
Zfp266
Zfp27
Zfp273
Zfp275
Zfp276
Zfp277
Zfp28
Zfp280b
Zfp280c
Zfp280d
Zfp281
Zfp282
Zfp286
Zfp287
Zfp292
Zfp296
Zfp297
Zfp297b
Zfp3
Zfp30
Zfp300
Zfp316
Zfp317
Zfp318
Zfp319
Zfp322a
Zfp324
Zfp326
Zfp329
Zfp334
Zfp335
Zfp341
Zfp346
Zfp35
Zfp354a
Zfp354b
Zfp354c
Zfp358
Zfp36
Zfp362
Zfp365
Zfp366
Zfp367
Zfp369
Zfp36l1
Zfp36l2
Zfp36l3
Zfp37
Zfp382
Zfp383
Zfp384
Zfp385a
Zfp385b
Zfp386
Zfp39
Zfp395
Zfp397
Zfp398
Zfp407
Zfp408
Zfp41
Zfp410
Zfp414
Zfp418
Zfp42
Zfp420
Zfp422
Zfp423
Zfp426
Zfp428
Zfp433
Zfp438
Zfp444
Zfp445
Zfp446
Zfp449
Zfp451
Zfp454
Zfp457
Zfp458
Zfp46
Zfp462
Zfp467
Zfp473
Zfp474
Zfp488
Zfp498
Zfp503
Zfp507
Zfp509
Zfp51
Zfp511
Zfp512
Zfp513
Zfp516
Zfp518a
Zfp518b
Zfp521
Zfp523
Zfp524
Zfp526
Zfp532
Zfp534
Zfp536
Zfp541
Zfp551
Zfp553
Zfp558
Zfp560
Zfp563
Zfp566
Zfp57
Zfp574
Zfp575
Zfp579
Zfp58
Zfp580
Zfp583
Zfp59
Zfp592
Zfp593
Zfp595
Zfp597
Zfp598
Zfp60
Zfp600
Zfp605
Zfp606
Zfp607
Zfp608
Zfp609
Zfp612
Zfp616
Zfp617
Zfp618
Zfp619
Zfp62
Zfp623
Zfp628
Zfp629
Zfp637
Zfp639
Zfp64
Zfp641
Zfp644
Zfp646
Zfp647
Zfp648
Zfp65
Zfp652
Zfp653
Zfp654
Zfp655
Zfp661
Zfp664
Zfp667
Zfp668
Zfp672
Zfp687
Zfp688
Zfp689
Zfp69
Zfp691
Zfp692
Zfp692-ps
Zfp697
Zfp7
Zfp703
Zfp704
Zfp706
Zfp707
Zfp709
Zfp710
Zfp711
Zfp712
Zfp715
Zfp72
Zfp729a
Zfp729b
Zfp735
Zfp738
Zfp74
Zfp740
Zfp746
Zfp750
Zfp764
Zfp768
Zfp770
Zfp771
Zfp772
Zfp775
Zfp777
Zfp78
Zfp780b
Zfp784
Zfp786
Zfp787
Zfp790
Zfp791
Zfp799
Zfp800
Zfp804a
Zfp804b
Zfp82
Zfp821
Zfp827
Zfp831
Zfp84
Zfp846
Zfp865
Zfp867
Zfp869
[truncated: 76 more rows]

## Sheet: Intial TFs in Model
Initial TFs considered for TRN inference (869 TFs)
0610010F05Rik
Abl1
Acd
Adnp
Aebp1
Aebp2
Aff1
Aff3
Aff4
Agfg1
Ahctf1
Ahdc1
Ahr
Ahrr
Aim2
Akna
Ankrd33b
Ankrd61
Ankzf1
App
Ar
Arid2
Arid3a
Arid3b
Arid4a
Arid4b
Arid5a
Arnt2
Arntl2
Arrb1
Arrb2
Ascl2
Ascl4
Ash1l
Asxl1
Asxl2
Atf2
Atf3
Atf5
Atf6
Atf6b
Atmin
Atrx
Atxn1
Bach1
Banf1
Banp
Batf
Batf3
Bbx
Bcl11b
Bcl3
Bcl6
Bcl6b
Bclaf1
Bdp1
Bhlha15
Bhlhe40
Bhlhe41
Blm
Bmyc
Brca1
Brca2
Brip1
C030039L03Rik
C1d
Cacna1a
Carf
Casp8ap2
Casz1
Cbx2
Cc2d1a
Ccdc17
Cdc5l
Cdk9
Cdkn2a
Cdt1
Cebpb
Cebpg
Cebpz
Cenpb
Cenpc1
Cenpt
Cenpw
Cggbp1
Chd1
Chd2
Chd5
Chd6
Chd7
Chd9
Chtf18
Cic
Clock
Cpsf4
Creb1
Creb3l1
Creb3l2
Creb5
Crebl2
Crem
Cry2
Csde1
Csrnp1
Ctbp1
Cux1
Cxxc1
Cxxc5
D3Ertd254e
Dach2
Dbp
Ddit3
Ddx1
Ddx11
Ddx20
Ddx3x
Ddx41
Deaf1
Dedd2
Dek
Dffb
Dhx36
Dhx58
Dlx3
Dmap1
Dmrt1
Dmrt2
Dmrta2
Dmtf1
Dnajc1
Dnajc2
Dnajc21
Dntt
Dot1l
Dpf1
Dpf3
Dr1
Drap1
Dzip1
E2f1
E2f4
E4f1
Eaf2
Ebf1
Edf1
Eea1
Eepd1
Egr1
Egr2
Egr3
Egr4
Elf1
Elk3
Elk4
Eno1
Eomes
Epas1
Erf
Erg
Esr1
Esrra
Etohi1
Ets1
Ets2
Etv1
Etv2
Etv4
Etv5
Etv6
Fancm
Fbxl19
Fbxo21
Fli1
Fos
Fosb
Fosl1
Fosl2
Foxa1
Foxb1
Foxc1
Foxf2
Foxh1
Foxj1
Foxn2
Foxn3
Foxo1
Foxo3
Foxp1
Foxp2
Foxp3
Foxp4
Foxq1
Foxs1
Gabpa
Gabpb2
Gata1
Gata2
Gata3
Gen1
Gfi1
Gli1
Gli3
Glis1
Glis2
Glis3
Gm10324
Gm13051
Gm13154
Gm13157
Gm13212
Gm13242
Gm13251
Gm14308
Gm14325
Gm14326
Gm14420
Gm5595
Gm6710
Gpbp1
Grhl2
Gtf2a1
Gtf2ird1
Gtf3c4
Gzf1
H1foo
Hbp1
Hdx
Hells
Hes1
Hes5
Hes6
Hesx1
Hey1
Heyl
Hhex
Hic1
Hif1a
Hif3a
Hlf
Hltf
Hlx
Hmg20b
Hmga1
Hmga2
Hmgb2
Hmgb3
Hmgn1
Hmgn3
Hmgn5
Hmx2
Hmx3
Homez
Hopx
Hoxb1
Hoxd11
Hoxd4
Hsf1
Hsf2
Hsf4
Id1
Id2
Id3
Ifih1
Ift57
Ikzf2
Ikzf3
Ikzf4
Ikzf5
Impdh1
Ing2
Insm1
Irf1
Irf2
Irf4
Irf5
Irf7
Irf8
Irf9
Isl2
Iws1
Jazf1
Jdp2
Jun
Junb
Jund
Kdm1b
Kdm2b
Kdm5a
Kdm5b
Kdm5d
Klf10
Klf11
Klf12
Klf13
Klf2
Klf3
Klf4
Klf5
Klf6
Klf7
Klf8
Klf9
L3mbtl3
Lbr
Lcor
Lcorl
Lef1
Lemd3
Lhx2
Lhx5
Lhx6
Lig1
Lig4
Lin28b
Lin54
Lmo2
Lrrfip1
Luc7l3
Lyl1
Maf
Mafb
Maff
Mafg
Mbd3
Mbd5
Mbd6
Mbnl1
Mbnl2
Med1
Mef2b
Mef2d
Meis1
Meis2
Meis3
Men1
Mesp2
Mga
Mgmt
Mier1
Mier2
Mier3
Mis18bp1
Mitf
Mlf1
Mlxipl
Mnd1
Mnt
Mpg
Msc
Msh3
Msh5
Msx2
Mta3
Mtf2
Mus81
Mxd1
Mxd3
Mxd4
Mxi1
Myb
Mybl1
Myc
Mycn
Mypop
Mysm1
Myt1l
Nacc2
Naif1
Ncl
Ncoa1
Ncoa2
Ncoa3
Ncor2
Ndn
Neil1
Neil3
Nfat5
Nfatc1
Nfatc2
Nfatc4
Nfe2
Nfe2l2
Nfia
Nfic
Nfil3
Nfkb1
Nfkb2
Nfkbia
Nfkbib
Nfkbid
Nfkbie
Nfkbil1
Nhlh1
Nkrf
Nkx1-2
Nkx3-1
Nostrin
Notch1
Npas2
Npas4
Npm1
Nr1d1
Nr1d2
Nr1h2
Nr1i3
Nr2f1
Nr2f6
Nr3c1
Nr3c2
Nr4a1
Nr4a2
Nr4a3
Nrip1
Nthl1
Nupr1
Nusap1
Oasl1
Orc1
Orc4
Osr2
Otx1
Ovol1
Ovol2
Papd5
Patz1
Pbrm1
Pbx2
Pcbp1
Pcbp4
Pcgf2
Pcx
Pds5b
Peg10
Peg3
Phc1
Phc3
Phf20
Phf6
Phtf2
Pias4
Pif1
Pknox1
Plag1
Plagl1
Plagl2
Plscr1
Pml
Pnn
Pou2af1
Pou2f2
Pou3f1
Pou5f2
Pou6f1
Ppara
Ppard
Pparg
Ppfibp2
Ppp1r10
Ppp1r13l
Prdm1
Prdm16
Prdm2
Prdm8
Prdm9
Prkdc
Prm2
Prox1
Prox2
Prr12
Prrx1
Psip1
Ptges2
Purb
Rad50
Rad52
Rag1
Rara
Rarg
Rb1
Rbbp8
Rbck1
Rbpj
Rc3h2
Rcc1
Rcor2
Rel
Rela
Relb
Rest
Rev3l
Rfc1
Rfx1
Rfx2
Rfx3
Rfx7
Rfxank
Rlf
Rora
Rorc
Rreb1
Runx1
Runx2
Runx3
Rxra
Rxrb
Rybp
Sall3
Sall4
Sap30
Satb1
Satb2
Scmh1
Scml4
Scoc
Scrt1
Setdb2
Sfpq
Sgsm2
Shprh
Sin3a
Sirt6
Six1
Six3
Six4
Six5
Skil
Smad3
Smad4
Smad6
Smad7
Smarca2
Smarca5
Smarcad1
Smc3
Smyd1
Snai2
Snai3
Snapc1
Snapc2
Sohlh1
Son
Sos1
Sos2
Sox12
Sox13
Sox15
Sox21
Sox4
Sox5
Sox6
Sp100
Sp110
Sp140
Sp2
Sp3
Sp4
Sp6
Sp9
Spata24
Sphk1
Spib
Spin1
Srebf1
Srebf2
Srf
Ssbp1
Ssbp4
Ssh1
Ssh2
Ssh3
St18
Stat1
Stat2
Stat3
Stat4
Stat5b
Stra13
Sub1
Sycp1
Taf1
Taf10
Taf13
Taf1c
Taf1d
Taf4b
Tal2
Tardbp
Tbx21
Tbx6
Tcea1
Tcea3
Tceanc
Tcf12
Tcf25
Tcf3
Tcf4
Tcf7l1
Tcf7l2
Tead1
Tead3
Tef
Terf1
Tet1
Tet3
Tfam
Tfdp2
Thap1
Thap2
Thap3
Thap7
Thoc1
Thra
Thrb
Tigd2
Tmf1
Tmpo
Tnp2
Top1
Top2a
Top2b
Topors
Tox
Tox2
Trerf1
Trim16
Trim21
Trim24
Trim28
Trim30a
Trim33
Trp53
Trp53bp1
Trp73
Trps1
Tsc22d1
Tsc22d2
Tsc22d3
Tsc22d4
Tshz2
Tsn
Twist1
Txk
Usf2
Utf1
Vax2
Vdr
Vps72
Wdhd1
Whsc1
Wiz
Wrn
Xbp1
Xrcc3
Xrcc5
Xrn1
Ybx2
Yy2
Zbed3
Zbed4
Zbed6
Zbp1
Zbtb1
Zbtb10
Zbtb11
Zbtb17
Zbtb20
Zbtb22
Zbtb26
Zbtb3
Zbtb32
Zbtb33
Zbtb34
Zbtb37
Zbtb38
Zbtb4
Zbtb41
Zbtb44
Zbtb45
Zbtb46
Zbtb48
Zbtb5
Zbtb6
Zbtb7a
Zbtb7b
Zbtb7c
Zc3h12a
Zc3h6
Zcchc11
Zeb1
Zeb2
Zfand3
Zfand6
Zfhx2
Zfhx3
Zfp105
Zfp11
Zfp111
Zfp112
Zfp113
Zfp120
Zfp146
Zfp148
Zfp160
Zfp169
Zfp182
Zfp184
Zfp189
Zfp2
Zfp202
Zfp219
Zfp26
Zfp260
Zfp263
Zfp266
Zfp273
Zfp275
Zfp276
Zfp277
Zfp28
Zfp280b
Zfp280c
Zfp280d
Zfp281
Zfp287
Zfp292
Zfp296
Zfp300
Zfp317
Zfp318
Zfp319
Zfp322a
Zfp329
Zfp334
Zfp335
Zfp341
Zfp35
Zfp354c
Zfp358
Zfp36
Zfp362
Zfp365
Zfp367
Zfp369
Zfp36l1
Zfp36l2
Zfp382
Zfp385a
Zfp386
Zfp39
Zfp395
Zfp397
Zfp398
Zfp407
Zfp414
Zfp418
Zfp420
Zfp426
Zfp428
Zfp444
Zfp445
Zfp449
Zfp458
Zfp462
Zfp467
Zfp473
Zfp503
Zfp51
Zfp511
Zfp513
Zfp516
Zfp518a
Zfp523
Zfp524
Zfp526
Zfp532
Zfp534
Zfp536
Zfp558
Zfp563
Zfp57
Zfp574
Zfp575
Zfp579
Zfp58
Zfp580
Zfp583
Zfp59
Zfp593
Zfp595
Zfp597
Zfp598
Zfp60
Zfp600
Zfp605
Zfp606
Zfp607
Zfp608
Zfp609
Zfp612
Zfp617
Zfp618
Zfp619
Zfp62
Zfp628
Zfp629
Zfp64
Zfp641
Zfp644
Zfp652
Zfp653
Zfp654
Zfp655
Zfp664
Zfp667
Zfp668
Zfp688
Zfp692
Zfp703
Zfp704
Zfp707
Zfp709
Zfp711
Zfp712
Zfp715
Zfp72
Zfp738
Zfp750
Zfp768
Zfp770
Zfp771
Zfp775
Zfp777
Zfp780b
Zfp787
Zfp790
Zfp791
Zfp800
Zfp827
Zfp831
Zfp84
Zfp865
Zfp867
Zfp869
Zfp879
Zfp9
Zfp90
Zfp91
Zfp93
Zfp932
Zfp97
Zfpm1
Zfr
Zfx
Zhx1
Zhx2
Zhx3
Zic2
Zic5
Zik1
Zkscan1
Zkscan17
Zmat1
Zranb3
Zscan10
Zscan2
Zscan22
Zscan29
Zufsp
Zzz3

## Sheet: Updated TF List
Updated TF List (1577 putative TFs)
2010315B03Rik
2410141K09Rik
2610008E11Rik
2610305D13Rik
2700081O15Rik
2810021J22Rik
4932411N23Rik
5730507C01Rik
9130019O22Rik
9130023H24Rik
9830147E19Rik
A430033K04Rik
AI987944
AU041133
AW146154
Aatf
Adnp
Adnp2
Aebp1
Aebp2
Aff2
Ahctf1
Ahdc1
Ahr
Ahrr
Aire
Akap8
Akap8l
Akna
Alx1
Alx3
Alx4
Ankzf1
Ar
Arhgap35
Arid2
Arid3a
Arid3b
Arid3c
Arid5a
Arid5b
Arnt
Arnt2
Arntl
Arntl2
Arx
Ascl1
Ascl2
Ascl3
Ascl4
Ascl5
Ash1l
Atf1
Atf2
Atf3
Atf4
Atf5
Atf6
Atf6b
Atf7
Atmin
Atoh1
Atoh7
Atoh8
BC025920
Bach1
Bach2
Barhl1
Barhl2
Barx1
Barx2
Batf
Batf2
Batf3
Baz2a
Baz2b
Bbx
Bcl11a
Bcl11b
Bcl6
Bcl6b
Bhlha15
Bhlha9
Bhlhe22
Bhlhe23
Bhlhe40
Bhlhe41
Bnc1
Bnc2
Bptf
Brf2
Bsx
C030039L03Rik
Camta1
Camta2
Carf
Casz1
Cbx2
Cc2d1a
Ccdc17
Cdc5l
Cdip1
Cdx1
Cdx2
Cdx4
Cebpa
Cebpb
Cebpd
Cebpe
Cebpg
Cebpz
Cenpa
Cenpb
Cenpt
Cggbp1
Champ1
Chchd3
Cic
Clec4a1
Clock
Cpeb1
Cphx1
Cphx2
Cphx3
Cpxcr1
Creb1
Creb3
Creb3l1
Creb3l2
Creb3l3
Creb3l4
Creb5
Crebl2
Crebzf
Crem
Crx
Crxos
Csrnp1
Csrnp2
Csrnp3
Ctcf
Ctcfl
Cux1
Cux2
Cxxc1
Cxxc4
Cxxc5
D3Ertd254e
Dach1
Dach2
Dbp
Dbx1
Dbx2
Ddit3
Deaf1
Dlx1
Dlx2
Dlx3
Dlx4
Dlx5
Dlx6
Dmbx1
Dmrt1
Dmrt2
Dmrt3
Dmrta1
Dmrta2
Dmrtb1
Dmrtc2
Dmtf1
Dnmt1
Dnttip1
Dot1l
Dpf1
Dpf3
Dr1
Drap1
Duxbl1
Duxbl2
Duxbl3
Dzip1
E2f1
E2f2
E2f3
E2f4
E2f5
E2f6
E2f7
E2f8
E430018J23Rik
E4f1
EU599041
Ebf1
Ebf2
Ebf3
Ebf4
Eea1
Egr1
Egr2
Egr3
Egr4
Ehf
Elf1
Elf2
Elf3
Elf4
Elf5
Elk1
Elk3
Elk4
Emx1
Emx2
En1
En2
Eomes
Epas1
Erf
Erg
Esr1
Esr2
Esrra
Esrrb
Esrrg
Esx1
Etohi1
Ets1
Ets2
Etv1
Etv2
Etv3
Etv3l
Etv4
Etv5
Etv6
Evx1
Evx2
Fam170a
Fbxl19
Ferd3l
Fev
Fezf1
Fezf2
Figla
Fiz1
Fli1
Flywch1
Fos
Fosb
Fosl1
Fosl2
Foxa1
Foxa2
Foxa3
Foxb1
Foxb2
Foxc1
Foxc2
Foxd1
Foxd2
Foxd3
Foxd4
Foxe1
Foxe3
Foxf1
Foxf2
Foxg1
Foxh1
Foxi1
Foxi2
Foxi3
Foxj1
Foxj2
Foxj3
Foxk1
Foxk2
Foxl1
Foxl2
Foxm1
Foxn1
Foxn2
Foxn3
Foxn4
Foxo1
Foxo3
Foxo4
Foxo6
Foxp1
Foxp2
Foxp3
Foxp4
Foxq1
Foxr1
Foxr2
Foxs1
Gabpa
Gata1
Gata2
Gata3
Gata4
Gata5
Gata6
Gatad2a
Gatad2b
Gbx1
Gbx2
Gcm1
Gcm2
Gfi1
Gfi1b
Gli1
Gli2
Gli3
Glis1
Glis2
Glis3
Glmp
Glyr1
Gm10324
Gm10778
Gm13051
Gm13139
Gm13154
Gm13157
Gm13212
Gm13242
Gm13247
Gm13251
Gm14124
Gm14139
Gm14295
Gm14305
Gm14308
Gm14322
Gm14325
Gm14326
Gm14391
Gm14393
Gm14412
Gm14419
Gm14420
Gm14431
Gm14434
Gm15446
Gm15753
Gm17768
Gm1862
Gm19428
Gm2026
Gm20541
Gm20939
Gm21082
Gm22
Gm2381
Gm29738
Gm29746
Gm3055
Gm30910
Gm31526
Gm31714
Gm32687
Gm33378
Gm3604
Gm4724
Gm4981
Gm5141
Gm5294
Gm5595
Gm6710
Gm7145
Gm7762
Gm8008
Gm8898
Gm9376
Gmeb1
Gmeb2
Gpbp1
Gpbp1l1
Grhl1
Grhl2
Grhl3
Gsc
Gsc2
Gsx1
Gsx2
Gtf2b
Gtf2i
Gtf2ird1
Gtf2ird2
Gtf3a
Gzf1
Hand1
Hand2
Hbp1
Hdx
Helt
Hes1
Hes2
Hes3
Hes5
Hes6
Hes7
Hesx1
Hey1
Hey2
Heyl
Hhex
Hic1
Hic2
Hif1a
Hif3a
Hinfp
Hivep1
Hivep2
Hivep3
Hlf
Hlx
Hmbox1
Hmg20a
Hmg20b
Hmga1
Hmga1-rs1
Hmga2
Hmgb1
Hmgb3
Hmx1
Hmx2
Hmx3
Hnf1a
Hnf1b
Hnf4a
Hnf4g
Homez
Hoxa1
Hoxa10
Hoxa11
Hoxa13
Hoxa2
Hoxa3
Hoxa4
Hoxa5
Hoxa6
Hoxa7
Hoxa9
Hoxb1
Hoxb13
Hoxb2
Hoxb3
Hoxb4
Hoxb5
Hoxb6
Hoxb7
Hoxb8
Hoxb9
Hoxc10
Hoxc11
Hoxc12
Hoxc13
Hoxc4
Hoxc5
Hoxc6
Hoxc8
Hoxc9
Hoxd1
Hoxd10
Hoxd11
Hoxd12
Hoxd13
Hoxd3
Hoxd4
Hoxd8
Hoxd9
Hsf1
Hsf2
Hsf3
Hsf4
Hsf5
Hsfy2
Ikzf1
Ikzf2
Ikzf3
Ikzf4
Ikzf5
Insm1
Insm2
Irf1
Irf2
Irf3
Irf4
Irf5
Irf6
Irf7
Irf8
Irf9
Irx1
Irx2
Irx3
Irx4
Irx5
Irx6
Isl1
Isl2
Isx
Jazf1
Jdp2
Jrk
Jrkl
Jun
Junb
Jund
Kat7
Kcmf1
Kcnip3
Kdm2a
Kdm2b
Kdm5b
Kin
Klf1
Klf10
Klf11
Klf12
Klf13
Klf14
Klf15
Klf16
Klf17
Klf2
Klf3
Klf4
Klf5
Klf6
Klf7
Klf8
Klf9
Kmt2a
Kmt2b
L3mbtl1
L3mbtl3
L3mbtl4
Lbx1
Lbx2
Lcor
Lcorl
Lef1
Lhx1
Lhx2
Lhx3
Lhx4
Lhx5
Lhx6
Lhx8
Lhx9
Lin28a
Lin28b
Lin54
Litaf
Lmx1a
Lmx1b
Ltf
Lyl1
Maf
Mafa
Mafb
Maff
Mafg
Mafk
Max
Maz
Mbd1
Mbd2
Mbd3
Mbd4
Mbd6
Mbnl2
Mecom
Mecp2
Mef2a
Mef2b
Mef2c
Mef2d
Meis1
Meis2
Meis3
Meox1
Meox2
Mesp1
Mesp2
Mga
Mitf
Mixl1
Mkx
Mlx
Mlxip
Mlxipl
Mnt
Mnx1
Msantd1
Msantd3
Msantd4
Msc
Msgn1
Msx1
Msx2
Msx3
Mterf1a
Mterf1b
Mterf2
Mterf3
Mterf4
Mtf1
Mtf2
Mxd1
Mxd3
Mxd4
Mxi1
Myb
Mybl1
Mybl2
Myc
Mycl
Mycn
Mycs
Myf5
Myf6
Mynn
Myod1
Myog
Mypop
Myrf
Myrfl
Mysm1
Myt1
Myt1l
Mzf1
Nacc2
Naif1
Nanog
Ncoa1
Ncoa2
Ncoa3
Neurod1
Neurod2
Neurod4
Neurod6
Neurog1
Neurog2
Neurog3
Nfat5
Nfatc1
Nfatc2
Nfatc3
Nfatc4
Nfe2
Nfe2l1
Nfe2l2
Nfe2l3
Nfia
Nfib
Nfic
Nfil3
Nfix
Nfkb1
Nfkb2
Nfx1
Nfxl1
Nfya
Nfyb
Nfyc
Nhlh1
Nhlh2
Nkrf
Nkx1-1
Nkx1-2
Nkx2-1
Nkx2-2
Nkx2-3
Nkx2-4
Nkx2-5
Nkx2-6
Nkx2-9
Nkx3-1
Nkx3-2
Nkx6-1
Nkx6-2
Nkx6-3
Nme2
Nobox
Noto
Npas1
Npas2
Npas3
Npas4
Nr0b1
Nr1d1
Nr1d2
Nr1h2
Nr1h3
Nr1h4
Nr1h5
Nr1i2
Nr1i3
Nr2c1
Nr2c2
Nr2e1
Nr2e3
Nr2f1
Nr2f2
Nr2f6
Nr3c1
Nr3c2
Nr4a1
Nr4a2
Nr4a3
Nr5a1
Nr5a2
Nr6a1
Nrf1
Nrl
Obox1
Obox3
Obox5
Obox6
Obox7
Olig1
Olig2
Olig3
Onecut1
Onecut2
Onecut3
Osr1
Osr2
Otp
Otx1
Otx2
Ovol1
Ovol2
Ovol3
Pa2g4
Patz1
Pax1
Pax2
Pax3
Pax4
Pax5
Pax6
Pax7
Pax8
Pax9
Pbx1
Pbx2
Pbx3
Pbx4
Pcgf2
Pcgf6
Pdx1
Peg3
Pgr
Phf1
Phf20
Phf21a
Phox2a
Phox2b
Pin1
Pitx1
Pitx2
Pitx3
Pknox1
Pknox2
Plag1
Plagl1
Plagl2
Plscr1
Pogk
Pou1f1
Pou2af1
Pou2f1
Pou2f2
Pou2f3
Pou3f1
Pou3f2
Pou3f3
Pou3f4
Pou4f1
Pou4f2
Pou4f3
Pou5f1
Pou5f2
Pou6f1
Pou6f2
Ppara
Ppard
Pparg
Prdm1
Prdm10
Prdm12
Prdm13
Prdm14
Prdm15
Prdm16
Prdm2
Prdm4
Prdm5
Prdm6
Prdm8
Prdm9
Preb
Prkrir
Prmt3
Prop1
Prox1
Prox2
Prr12
Prrx1
Prrx2
Prrxl1
Ptf1a
Pura
Purb
Purg
Rag1
Rara
Rarb
Rarg
Rax
Rbak
Rbck1
Rbpj
Rbpjl
Rbsn
Rcor3
Rel
Rela
Relb
Repin1
Rest
Rex2
Rexo4
Rfx1
Rfx2
Rfx3
Rfx4
Rfx5
Rfx6
Rfx7
Rfx8
Rhox1
Rhox10
Rhox11
Rhox12
Rhox13
Rhox2a
Rhox2b
Rhox2c
Rhox2d
Rhox2e
Rhox2f
Rhox2g
Rhox2h
Rhox3a
Rhox3a2
Rhox3c
Rhox3e
Rhox3f
Rhox3g
Rhox3h
Rhox4a
Rhox4a2
Rhox4b
Rhox4c
Rhox4d
Rhox4e
Rhox4f
Rhox4g
Rhox6
Rhox7a
Rhox8
Rhox9
Rlf
Rnf138rt1
Rora
Rorb
Rorc
Rreb1
Rsl1
Rslcan18
Runx1
Runx2
Runx3
Rxra
Rxrb
Rxrg
Safb
Safb2
Sall1
Sall2
Sall3
Sall4
Satb1
Satb2
Scmh1
Scml4
Scrt1
Scrt2
Scx
Sebox
Setbp1
Setdb1
Setdb2
Sgsm2
Shox2
Sim1
Sim2
Six1
Six2
Six3
Six4
Six5
Six6
Ski
Skil
Skor2
Smad1
Smad3
Smad4
Smad5
Smad9
Smyd3
Snai1
Snai2
Snai3
Snapc2
Snapc4
Snapc5
Sohlh1
Sohlh2
Son
Sox1
Sox10
Sox11
Sox12
Sox13
Sox14
Sox15
Sox17
Sox18
Sox2
Sox21
Sox3
Sox30
Sox4
Sox5
Sox6
Sox7
Sox8
Sox9
Sp1
Sp100
Sp110
Sp140
Sp2
Sp3
Sp4
Sp5
Sp6
Sp7
Sp8
Sp9
Spdef
Spen
Spi1
Spib
Spic
Spz1
Srcap
Srebf1
Srebf2
Srf
Sry
St18
Stat1
Stat2
Stat3
Stat4
Stat5a
Stat5b
Stat6
T
Tal1
Tal2
Tbp
Tbpl1
Tbpl2
Tbr1
Tbx1
Tbx10
Tbx15
Tbx18
Tbx19
Tbx2
Tbx20
Tbx21
Tbx22
Tbx3
Tbx4
Tbx5
Tbx6
Tcf12
Tcf15
Tcf20
Tcf21
Tcf23
Tcf24
Tcf3
Tcf4
Tcf7
Tcf7l1
Tcf7l2
Tcfl5
Tead1
Tead2
Tead3
Tead4
Tef
Terf1
Terf2
Tet1
Tet2
Tet3
Tfap2a
Tfap2b
Tfap2c
Tfap2d
Tfap2e
Tfap4
Tfcp2
Tfcp2l1
Tfdp1
Tfdp2
Tfe3
Tfeb
Tfec
Tgif1
Tgif2
Tgif2lx1
Tgif2lx2
Thap1
Thap11
Thap2
Thap3
Thap4
Thap7
Thra
Thrb
Thyn1
Tigd2
Tigd3
Tigd4
Tigd5
Tlx1
Tlx2
Tlx3
Tmf1
Topors
Trafd1
Trerf1
Trp53
Trp63
Trp73
Trps1
Tsc22d1
Tshz1
Tshz2
Tshz3
Ttf1
Tulp1
Tulp2
Tulp3
Twist1
Twist2
Ubp1
Ubtfl1
Uncx
Usf1
Usf2
Usf3
Vax1
Vax2
Vdr
Vezf1
Vsx1
Vsx2
Whsc1
Wiz
Wt1
Xbp1
Xpa
Ybx1
Ybx2
Ybx3
Yy1
Yy2
Zbed3
Zbed4
Zbed5
Zbed6
Zbtb1
Zbtb10
Zbtb11
Zbtb12
Zbtb14
Zbtb16
Zbtb17
Zbtb18
Zbtb2
Zbtb20
Zbtb21
Zbtb22
Zbtb24
Zbtb25
Zbtb26
Zbtb3
Zbtb32
Zbtb33
Zbtb34
Zbtb37
Zbtb38
Zbtb39
Zbtb4
Zbtb40
Zbtb41
Zbtb42
Zbtb43
Zbtb44
Zbtb45
Zbtb46
Zbtb48
Zbtb49
Zbtb5
Zbtb6
Zbtb7a
Zbtb7b
Zbtb7c
Zbtb8a
Zbtb8b
Zbtb9
Zc3h8
Zeb1
Zeb2
Zfat
Zfhx2
Zfhx3
Zfhx4
Zfp1
Zfp101
Zfp105
Zfp108
Zfp109
Zfp11
Zfp110
Zfp111
Zfp112
Zfp113
Zfp114
Zfp119a
Zfp119b
Zfp12
Zfp120
Zfp128
Zfp13
Zfp131
Zfp14
Zfp141
Zfp142
Zfp143
Zfp146
Zfp148
Zfp157
Zfp160
Zfp169
Zfp174
Zfp180
Zfp182
Zfp184
Zfp189
Zfp191
Zfp2
Zfp202
Zfp207
Zfp212
Zfp213
Zfp217
Zfp219
Zfp229
Zfp235
Zfp236
Zfp239
Zfp24
Zfp248
Zfp251
Zfp26
Zfp260
Zfp263
Zfp266
Zfp27
Zfp273
Zfp275
Zfp276
Zfp277
Zfp28
Zfp280b
Zfp280c
Zfp280d
Zfp281
Zfp282
Zfp286
Zfp287
Zfp292
Zfp296
Zfp3
Zfp30
Zfp300
Zfp316
Zfp317
Zfp318
Zfp319
Zfp322a
Zfp324
Zfp326
Zfp329
Zfp334
Zfp335
Zfp341
Zfp345
Zfp346
Zfp35
Zfp352
Zfp354a
Zfp354b
Zfp354c
Zfp358
Zfp362
Zfp365
Zfp366
Zfp367
Zfp369
Zfp37
Zfp382
Zfp383
Zfp384
Zfp385a
Zfp385b
Zfp386
Zfp39
Zfp395
Zfp397
Zfp398
Zfp40
Zfp407
Zfp408
Zfp41
Zfp410
Zfp414
Zfp418
Zfp42
Zfp420
Zfp422
Zfp423
Zfp426
Zfp428
Zfp429
Zfp433
Zfp438
Zfp442
Zfp444
Zfp445
Zfp446
Zfp449
Zfp451
Zfp454
Zfp455
Zfp456
Zfp457
Zfp458
Zfp459
Zfp46
Zfp462
Zfp467
Zfp472
Zfp473
Zfp474
Zfp488
Zfp493
Zfp503
Zfp507
Zfp51
Zfp511
Zfp512
Zfp512b
Zfp513
Zfp516
Zfp518a
Zfp518b
Zfp52
Zfp521
Zfp523
Zfp524
Zfp526
Zfp53
Zfp532
Zfp534
Zfp536
Zfp54
Zfp541
Zfp551
Zfp553
Zfp558
Zfp560
Zfp563
Zfp566
Zfp568
Zfp57
Zfp574
Zfp575
Zfp579
Zfp58
Zfp580
Zfp583
Zfp59
Zfp592
Zfp595
Zfp597
Zfp598
Zfp599
Zfp60
Zfp600
Zfp605
Zfp606
Zfp607
Zfp607a
Zfp607b
Zfp608
Zfp609
Zfp61
Zfp612
Zfp616
Zfp617
Zfp618
Zfp619
Zfp62
Zfp623
Zfp628
Zfp629
Zfp637
Zfp639
Zfp64
Zfp641
Zfp644
Zfp646
Zfp647
Zfp648
Zfp65
Zfp651
Zfp652
Zfp653
Zfp654
Zfp655
Zfp658
Zfp661
Zfp663
Zfp664
Zfp667
Zfp668
Zfp672
Zfp677
Zfp68
Zfp687
Zfp688
Zfp689
Zfp69
Zfp691
Zfp692
Zfp697
Zfp7
Zfp703
Zfp704
Zfp706
Zfp707
Zfp708
Zfp709
Zfp710
Zfp711
Zfp712
Zfp715
Zfp719
Zfp72
Zfp729a
Zfp729b
Zfp735
Zfp738
Zfp74
Zfp740
Zfp746
Zfp747
Zfp748
Zfp750
Zfp758
Zfp759
Zfp760
Zfp763
Zfp764
Zfp768
Zfp770
Zfp771
Zfp772
Zfp773
Zfp775
Zfp777
Zfp78
Zfp780b
Zfp784
Zfp786
Zfp787
Zfp788
Zfp790
Zfp791
Zfp799
Zfp800
Zfp804a
Zfp804b
Zfp808
Zfp809
Zfp81
Zfp810
Zfp811
Zfp819
Zfp82
Zfp820
Zfp821
Zfp825
Zfp827
Zfp830
Zfp831
Zfp84
Zfp846
Zfp85
Zfp850
Zfp853
Zfp865
Zfp866
Zfp867
Zfp868
Zfp869
Zfp87
Zfp870
Zfp871
Zfp872
Zfp873
Zfp874a
Zfp874b
Zfp879
Zfp882
Zfp9
Zfp90
Zfp91
Zfp92
Zfp93
Zfp930
Zfp931
Zfp932
Zfp933
Zfp934
Zfp935
Zfp936
Zfp937
Zfp938
Zfp939
Zfp94
Zfp940
Zfp941
Zfp942
Zfp943
Zfp944
Zfp945
Zfp946
Zfp947
Zfp948
Zfp949
Zfp951
Zfp952
Zfp953
Zfp954
Zfp955a
Zfp955b
Zfp956
Zfp958
Zfp959
Zfp960
Zfp961
Zfp963
Zfp964
Zfp965
Zfp966
Zfp967
Zfp97
Zfp970
Zfp971
Zfp974
Zfp975
Zfp976
Zfp979
Zfp980
Zfp981
Zfp982
Zfp983
Zfp984
Zfp985
Zfp987
Zfp991
Zfp992
Zfp994
Zfp995
Zfpm1
Zfpm2
Zfx
Zfy1
Zfy2
Zglp1
Zgpat
Zhx1
Zhx2
Zhx3
Zic1
Zic2
Zic3
Zic4
Zic5
Zik1
Zim1
Zkscan1
Zkscan14
Zkscan16
Zkscan17
Zkscan2
Zkscan3
Zkscan4
Zkscan5
Zkscan6
Zkscan7
Zkscan8
Zmat1
Zmat4
Zmiz1
Zmiz2
Znf512b
Zrsr2
Zrsr2Aatf
Zscan10
Zscan12
Zscan18
Zscan2
Zscan20
Zscan21
Zscan22
Zscan25
Zscan26
Zscan29
Zscan30
Zscan4b
Zscan4c
Zscan4d
Zscan4e
Zscan4f
Zscan5b
Zufsp
Zxdb
Zxdc
Zzz3
Zzz3Zglp1

## Sheet: Updated TFs in Model
Updated TFs considered for TRN inference (715 TFs)
2610008E11Rik
2810021J22Rik
A430033K04Rik
AI987944
AU041133
AW146154
Adnp
Aebp1
Aebp2
Ahctf1
Ahdc1
Ahr
Ahrr
Akna
Ankzf1
Ar
Arid2
Arid3a
Arid3b
Arid5a
Arnt2
Arntl2
Ascl2
Ascl4
Ash1l
Atf2
Atf3
Atf5
Atf6
Atf6b
Atmin
Bach1
Batf
Batf3
Bbx
Bcl11b
Bcl6
Bcl6b
Bhlha15
Bhlhe40
Bhlhe41
Brf2
C030039L03Rik
Carf
Casz1
Cbx2
Cc2d1a
Ccdc17
Cdc5l
Cebpb
Cebpg
Cebpz
Cenpb
Cenpt
Cggbp1
Cic
Clock
Creb1
Creb3l1
Creb3l2
Creb5
Crebl2
Crem
Csrnp1
Cux1
Cxxc1
Cxxc5
D3Ertd254e
Dach2
Dbp
Ddit3
Deaf1
Dlx3
Dmrt1
Dmrt2
Dmrta2
Dmtf1
Dot1l
Dpf1
Dpf3
Dr1
Drap1
Dzip1
E2f1
E2f4
E4f1
Ebf1
Eea1
Egr1
Egr2
Egr3
Egr4
Elf1
Elk3
Elk4
Eomes
Epas1
Erf
Erg
Esr1
Esrra
Etohi1
Ets1
Ets2
Etv1
Etv2
Etv4
Etv5
Etv6
Fbxl19
Fli1
Fos
Fosb
Fosl1
Fosl2
Foxa1
Foxb1
Foxc1
Foxf2
Foxh1
Foxj1
Foxn2
Foxn3
Foxo1
Foxo3
Foxp1
Foxp2
Foxp3
Foxp4
Foxq1
Foxs1
Gabpa
Gata1
Gata2
Gata3
Gfi1
Gli1
Gli3
Glis1
Glis2
Glis3
Gm10324
Gm10778
Gm13051
Gm13139
Gm13154
Gm13157
Gm13212
Gm13242
Gm13251
Gm14295
Gm14308
Gm14325
Gm14326
Gm14420
Gm3604
Gm5595
Gm6710
Gpbp1
Grhl2
Gtf2ird1
Gzf1
Hbp1
Hdx
Hes1
Hes5
Hes6
Hesx1
Hey1
Heyl
Hhex
Hic1
Hif1a
Hif3a
Hlf
Hlx
Hmg20b
Hmga1
Hmga2
Hmgb1
Hmgb3
Hmx2
Hmx3
Homez
Hoxb1
Hoxd11
Hoxd4
Hsf1
Hsf2
Hsf4
Ikzf2
Ikzf3
Ikzf4
Ikzf5
Insm1
Irf1
Irf2
Irf4
Irf5
Irf7
Irf8
Irf9
Isl2
Jazf1
Jdp2
Jun
Junb
Jund
Kdm2b
Kdm5b
Klf10
Klf11
Klf12
Klf13
Klf2
Klf3
Klf4
Klf5
Klf6
Klf7
Klf8
Klf9
L3mbtl3
Lcor
Lcorl
Lef1
Lhx2
Lhx5
Lhx6
Lin28b
Lin54
Litaf
Lyl1
Maf
Mafb
Maff
Mafg
Mbd3
Mbd6
Mbnl2
Mef2b
Mef2d
Meis1
Meis2
Meis3
Mesp2
Mga
Mitf
Mlxipl
Mnt
Msc
Msx2
Mtf2
Mxd1
Mxd3
Mxd4
Mxi1
Myb
Mybl1
Myc
Mycn
Mypop
Mysm1
Myt1l
Nacc2
Naif1
Ncoa1
Ncoa2
Ncoa3
Nfat5
Nfatc1
Nfatc2
Nfatc4
Nfe2
Nfe2l2
Nfia
Nfic
Nfil3
Nfkb1
Nfkb2
Nhlh1
Nkrf
Nkx1-2
Nkx3-1
Npas2
Npas4
Nr1d1
Nr1d2
Nr1h2
Nr1i3
Nr2f1
Nr2f6
Nr3c1
Nr3c2
Nr4a1
Nr4a2
Nr4a3
Osr2
Otx1
Ovol1
Ovol2
Patz1
Pbx2
Pcgf2
Peg3
Phf1
Phf20
Pknox1
Plag1
Plagl1
Plagl2
Plscr1
Pou2af1
Pou2f2
Pou3f1
Pou5f2
Pou6f1
Ppara
Ppard
Pparg
Prdm1
Prdm16
Prdm2
Prdm8
Prdm9
Prox1
Prox2
Prr12
Prrx1
Purb
Rag1
Rara
Rarg
Rbck1
Rbpj
Rel
Rela
Relb
Rest
Rfx1
Rfx2
Rfx3
Rfx7
Rlf
Rora
Rorc
Rreb1
Runx1
Runx2
Runx3
Rxra
Rxrb
Sall3
Sall4
Satb1
Satb2
Scmh1
Scml4
Scrt1
Setdb2
Sgsm2
Six1
Six3
Six4
Six5
Ski
Skil
Smad3
Smad4
Snai2
Snai3
Snapc2
Sohlh1
Son
Sox12
Sox13
Sox15
Sox21
Sox4
Sox5
Sox6
Sp100
Sp110
Sp140
Sp2
Sp3
Sp4
Sp6
Sp9
Spib
Srebf1
Srebf2
Srf
St18
Stat1
Stat2
Stat3
Stat4
Stat5b
Tal2
Tbx21
Tbx6
Tcf12
Tcf3
Tcf4
Tcf7l1
Tcf7l2
Tead1
Tead3
Tef
Terf1
Tet1
Tet2
Tet3
Tfdp2
Thap1
Thap2
Thap3
Thap7
Thra
Thrb
Tigd2
Tmf1
Topors
Trerf1
Trp53
Trp73
Trps1
Tsc22d1
Tshz2
Tulp2
Tulp3
Twist1
Usf2
Vax2
Vdr
Whsc1
Wiz
Xbp1
Ybx2
Yy2
Zbed3
Zbed4
Zbed6
Zbtb1
Zbtb10
Zbtb11
Zbtb17
Zbtb20
Zbtb22
Zbtb26
Zbtb3
Zbtb32
Zbtb33
Zbtb34
Zbtb37
Zbtb38
Zbtb4
Zbtb41
Zbtb44
Zbtb45
Zbtb46
Zbtb48
Zbtb5
Zbtb6
Zbtb7a
Zbtb7b
Zbtb7c
Zeb1
Zeb2
Zfhx2
Zfhx3
Zfp101
Zfp105
Zfp108
Zfp109
Zfp11
Zfp111
Zfp112
Zfp113
Zfp119a
Zfp119b
Zfp120
Zfp146
Zfp148
Zfp160
Zfp169
Zfp182
Zfp184
Zfp189
Zfp191
Zfp2
Zfp202
Zfp219
Zfp229
Zfp26
Zfp260
Zfp263
Zfp266
Zfp273
Zfp275
Zfp276
Zfp277
Zfp28
Zfp280b
Zfp280c
Zfp280d
Zfp281
Zfp287
Zfp292
Zfp296
Zfp300
Zfp317
Zfp318
Zfp319
Zfp322a
Zfp329
Zfp334
Zfp335
Zfp341
Zfp345
Zfp35
Zfp354c
Zfp358
Zfp362
Zfp365
Zfp367
Zfp369
Zfp382
Zfp385a
Zfp386
Zfp39
Zfp395
Zfp397
Zfp398
Zfp40
Zfp407
Zfp414
Zfp418
Zfp420
Zfp426
Zfp428
Zfp429
Zfp442
Zfp444
Zfp445
Zfp449
Zfp455
Zfp456
Zfp458
Zfp459
Zfp462
Zfp467
Zfp472
Zfp473
Zfp493
Zfp503
Zfp51
Zfp511
Zfp513
Zfp516
Zfp518a
Zfp52
Zfp523
Zfp524
Zfp526
Zfp53
Zfp532
Zfp534
Zfp536
Zfp54
Zfp558
Zfp563
Zfp568
Zfp57
Zfp574
Zfp575
Zfp579
Zfp58
Zfp580
Zfp583
Zfp59
Zfp595
Zfp597
Zfp598
Zfp599
Zfp60
Zfp600
Zfp605
Zfp606
Zfp607
Zfp608
Zfp609
Zfp612
Zfp617
Zfp618
Zfp619
Zfp62
Zfp628
Zfp629
Zfp64
Zfp641
Zfp644
Zfp651
Zfp652
Zfp653
Zfp654
Zfp655
Zfp658
Zfp664
Zfp667
Zfp668
Zfp677
Zfp68
Zfp688
Zfp692
Zfp703
Zfp704
Zfp707
Zfp708
Zfp709
Zfp711
Zfp712
Zfp715
Zfp719
Zfp72
Zfp738
Zfp748
Zfp750
Zfp758
Zfp759
Zfp760
Zfp763
Zfp768
Zfp770
Zfp771
Zfp775
Zfp777
Zfp780b
Zfp787
Zfp788
Zfp790
Zfp791
Zfp800
Zfp808
Zfp809
Zfp81
Zfp810
Zfp820
Zfp825
Zfp827
Zfp831
Zfp84
Zfp865
Zfp866
Zfp867
Zfp868
Zfp869
Zfp87
Zfp870
Zfp871
Zfp873
Zfp874a
Zfp874b
Zfp879
Zfp882
Zfp9
Zfp90
Zfp91
Zfp93
Zfp930
Zfp931
Zfp932
Zfp933
Zfp934
Zfp935
Zfp937
Zfp938
Zfp941
Zfp942
Zfp943
Zfp944
Zfp945
Zfp946
Zfp947
Zfp948
Zfp951
Zfp953
Zfp955a
Zfp955b
Zfp956
Zfp958
Zfp959
Zfp960
Zfp961
Zfp97
Zfpm1
Zfx
Zhx1
Zhx2
Zhx3
Zic2
Zic5
Zik1
Zkscan1
Zkscan17
Zmat1
Zmiz1
Zmiz2
Zscan10
Zscan2
Zscan22
Zscan29
Zufsp
Zzz3
