# Supplementary material for: Leveraging chromatin accessibility for transcriptional regulatory network inference in T Helper 17 Cells
Source: Genome Res. 2019 Mar;29(3):449–63. doi: 10.1101/gr.238253.118 (PMC6396413; doi:10.1101/gr.238253.118)
Supplement: Supplemental Material [file supp_gr.238253.118_Supplemental_Table_S4.xlsx]

## Sheet: Table S4 Legend
Table S4. Lists of sample names corresponding to each leave-out set.

## Sheet: Early Th17 LO
"Early Th17" leave-out, test set sample IDs
Th17_wt_1h_SL1851
Th17_wt_3h_SL1852
Th17_wt_6h_SL1853
Th17_wt_9h_SL1854
Th17_wt_12h_SL1855
Th17_wt_16h_SL1856
Th17_wt_16h_SL8353
Th17_wt_16h_SL8355

## Sheet: Late Th17 LO
"Late Th17" leave-out, test set sample IDs
th17N_48h_Dig_150817
th17N_48h_Dig_150829
th17N_48h_Veh_150817
th17N_48h_Veh_150829
th17N_96h_Dig_150719
th17N_96h_Dig_150729
th17N_96h_Dig_150812
th17N_96h_Veh_150729
th17N_96h_Veh_150812
th17P_48h_Dig_150817
th17P_48h_Dig_150829
th17P_48h_Veh_150817
th17P_48h_Veh_150829
th17P_96h_Dig_150719
th17P_96h_Dig_150729
th17P_96h_Dig_150812
th17P_96h_Veh_150729
th17P_96h_Veh_150812
*Note: Sample names above indicate length of time in polarization conditions following 12-14hr TCR stimulation, so sample-name time points are delayed 12-14 hours relative to (Ciofani et al., Cell, 2012) and other time points in the RNA-seq dataset.

## Sheet: All Th0 LO
"All Th0" leave-out, test set sample IDs
Th0_RORg_wt_pp_2_48h_SL1843
Th0_RORg_ko_GFP_KI_2_48h_SL1845
Th0_STAT3_wt_pCD4-Cre_7_48h_SL1847
Th0_STAT3_ko_flox_s_CD4-Cre_7_48h_SL1849
Th0_IRF4_wt_pCD4-Cre_4_48h_SL1860
Th0_IRF4_ko_flox_s_CD4-Cre_4_48h_SL1862
Th0_wt_1h_SL2654
Th0_wt_3h_SL2655
Th0_wt_6h_SL2656
Th0_wt_48h_SL2673
Th0_STAT3_ko_flox_s_CD4-Cre_8_48h_SL2674
Th0_RORg_wt_pp_3_48h_SL2679
Th0_RORg_ko_GFP_KI_3_48h_SL2681
Th0_c-Maf_wt_pCD4-Cre_12_48h_SL2762
Th0_c-Maf_ko_flox_s_CD4-Cre_12_48h_SL2764
Th0_IRF4_wt_pp_5_48h_SL2774
Th0_IRF4_ko_mm_5_48h_SL2776
Th0_wt_16h_SL2778
Th0_B-ATF_wt_pp_10_48h_SL3300
Th0_B-ATF_ko_mm_10_48h_SL3302
Th0_IRF4_wt_pp_6_48h_SL3307
Th0_IRF4_ko_mm_6_48h_SL3309
Th0_STAT3_wt_pCD4-Cre_8_48h_SL3540
Th0_c-Maf_wt_pCD4-Cre_13_48h_SL4217
Th0_c-Maf_ko_flox_s_CD4-Cre_13_48h_SL4219
Th0_B-ATF_wt_pp_11_48h_SL4221
Th0_B-ATF_ko_mm_11_48h_SL4223
Th0_RORg_w_RORg_inhibitor_ko_GFP_KI_DMSO_14_48h_SL5044
Th0_RORg_w_RORg_inhibitor_ko_GFP_KI_C16_14_48h_SL5045
Th0_RORa_BM_transfer_w_RORg_inhibitor_wt_pp_DMSO_15_48h_SL5049
Th0_RORa_BM_transfer_w_RORg_inhibitor_wt_pp_C16_15_48h_SL5050
Th0_RORa_BM_transfer_w_RORg_inhibitor_ko_mm_DMSO_15_48h_SL5054
Th0_RORa_BM_transfer_w_RORg_inhibitor_ko_mm_C16_15_48h_SL5055
Th0_RORa_RORg_BM_transfer_RORa_RORg_wt_16_48h_SL5873
Th0_RORa_RORg_BM_transfer_RORa_ko_RORg_ko_16_48h_SL5875
Th0_RORa_RORg_BM_transfer_RORa_RORg_wt_17_48h_SL5877
Th0_RORa_RORg_BM_transfer_RORa_ko_RORg_ko_17_48h_SL5879
Th0_RORg_wt_pp_1_16h_SL598
Th0_RORg_ko_GFP_KI_1_16h_SL601
Th0_Ikzf3_pp_18_48h_SL6493
Th0_Ikzf3_mm_18_48h_SL6495
Th0_wt_16h_SL8352
Th0_wt_16h_SL8354
Th0_Fosl2_flfl_CD4-Cre_48h_SL11895
Th0_Fosl2_flfl_CD4-Cre_48h_SL12529
Th0_Fosl2_pp_CD4-Cre_48h_SL11893
Th0_Fosl2_pp_CD4-Cre_48h_SL12527
Th0_Hif1a_flfl_CD4-cre_48h_SL11891
Th0_Hif1a_flfl_CD4-cre_48h_SL12365
Th0_Hif1a_pp_CD4-cre_48h_SL12363
Th0_Nrf2_mm_48h_SL12369
Th0_Nrf2_mm_48h_SL12371
Th0_Nrf2_pp_48h_SL12367

## Sheet: Complete Sample List (RNA-seq)
Sample IDs for all 254 samples in the RNA-seq dataset
48hr_Th17_SAA_1
48hr_Th17_SAA_2
48hr_Th17_veh_1
48hr_Th17_veh_2
CD4_T_cell_Batf_ko_48h_SL35226
CD4_T_cell_Batf_ko_48h_SL35228
CD4_T_cell_Batf_ko_48h_SL35230
CD4_T_cell_Batf_ko_48h_SL35232
CD4_T_cell_Batf_ko_48h_SL35234
CD4_T_cell_Batf_ko_48h_SL35236
CD4_T_cell_Batf_wt_48h_SL35225
CD4_T_cell_Batf_wt_48h_SL35227
CD4_T_cell_Batf_wt_48h_SL35229
CD4_T_cell_Batf_wt_48h_SL35231
CD4_T_cell_Batf_wt_48h_SL35233
CD4_T_cell_Batf_wt_48h_SL35235
CD4_T_cell_IRF4ko_48h_SL35238
CD4_T_cell_IRF4ko_48h_SL35240
CD4_T_cell_IRF4ko_48h_SL35242
CD4_T_cell_IRF4ko_48h_SL35244
CD4_T_cell_IRF4ko_48h_SL35246
CD4_T_cell_IRF4ko_48h_SL35248
CD4_T_cell_IRF4wt_48h_SL35237
CD4_T_cell_IRF4wt_48h_SL35239
CD4_T_cell_IRF4wt_48h_SL35241
CD4_T_cell_IRF4wt_48h_SL35243
CD4_T_cell_IRF4wt_48h_SL35245
CD4_T_cell_IRF4wt_48h_SL35247
iTreg_IMDM_wt_48h_SL2685
iTreg_IMDM_wt_48h_SL3305
media_only_nCD4_T_cell_wt_1h_SL2653
Th0_B-ATF_ko_mm_10_48h_SL3302
Th0_B-ATF_ko_mm_11_48h_SL4223
Th0_B-ATF_wt_pp_10_48h_SL3300
Th0_B-ATF_wt_pp_11_48h_SL4221
Th0_c-Maf_ko_flox_s_CD4-Cre_12_48h_SL2764
Th0_c-Maf_ko_flox_s_CD4-Cre_13_48h_SL4219
Th0_c-Maf_wt_pCD4-Cre_12_48h_SL2762
Th0_c-Maf_wt_pCD4-Cre_13_48h_SL4217
Th0_Fosl2_flfl_CD4-Cre_48h_SL11895
Th0_Fosl2_flfl_CD4-Cre_48h_SL12529
Th0_Fosl2_pp_CD4-Cre_48h_SL11893
Th0_Fosl2_pp_CD4-Cre_48h_SL12527
Th0_Hif1a_flfl_CD4-cre_48h_SL11891
Th0_Hif1a_flfl_CD4-cre_48h_SL12365
Th0_Hif1a_pp_CD4-cre_48h_SL12363
Th0_Ikzf3_mm_18_48h_SL6495
Th0_Ikzf3_pp_18_48h_SL6493
Th0_IRF4_ko_flox_s_CD4-Cre_4_48h_SL1862
Th0_IRF4_ko_mm_5_48h_SL2776
Th0_IRF4_ko_mm_6_48h_SL3309
Th0_IRF4_wt_pCD4-Cre_4_48h_SL1860
Th0_IRF4_wt_pp_5_48h_SL2774
Th0_IRF4_wt_pp_6_48h_SL3307
Th0_Nrf2_mm_48h_SL12369
Th0_Nrf2_mm_48h_SL12371
Th0_Nrf2_pp_48h_SL12367
Th0_RORa_BM_transfer_w_RORg_inhibitor_ko_mm_C16_15_48h_SL5055
Th0_RORa_BM_transfer_w_RORg_inhibitor_ko_mm_DMSO_15_48h_SL5054
Th0_RORa_BM_transfer_w_RORg_inhibitor_wt_pp_C16_15_48h_SL5050
Th0_RORa_BM_transfer_w_RORg_inhibitor_wt_pp_DMSO_15_48h_SL5049
Th0_RORa_RORg_BM_transfer_RORa_ko_RORg_ko_16_48h_SL5875
Th0_RORa_RORg_BM_transfer_RORa_ko_RORg_ko_17_48h_SL5879
Th0_RORa_RORg_BM_transfer_RORa_RORg_wt_16_48h_SL5873
Th0_RORa_RORg_BM_transfer_RORa_RORg_wt_17_48h_SL5877
Th0_RORg_ko_GFP_KI_1_16h_SL601
Th0_RORg_ko_GFP_KI_2_48h_SL1845
Th0_RORg_ko_GFP_KI_3_48h_SL2681
Th0_RORg_w_RORg_inhibitor_ko_GFP_KI_C16_14_48h_SL5045
Th0_RORg_w_RORg_inhibitor_ko_GFP_KI_DMSO_14_48h_SL5044
Th0_RORg_wt_pp_1_16h_SL598
Th0_RORg_wt_pp_2_48h_SL1843
Th0_RORg_wt_pp_3_48h_SL2679
Th0_STAT3_ko_flox_s_CD4-Cre_7_48h_SL1849
Th0_STAT3_ko_flox_s_CD4-Cre_8_48h_SL2674
Th0_STAT3_wt_pCD4-Cre_7_48h_SL1847
Th0_STAT3_wt_pCD4-Cre_8_48h_SL3540
Th0_wt_16h_SL2778
Th0_wt_16h_SL8352
Th0_wt_16h_SL8354
Th0_wt_1h_SL2654
Th0_wt_3h_SL2655
Th0_wt_48h_SL2673
Th0_wt_6h_SL2656
Th1_IMDM_wt_48h_SL2683
Th1_IMDM_wt_48h_SL3304
Th17_B-ATF_ko_mm_10_48h_SL3303
Th17_B-ATF_ko_mm_11_48h_SL4224
Th17_B-ATF_wt_pp_10_48h_SL3301
Th17_B-ATF_wt_pp_11_48h_SL4222
Th17_c-Maf_ko_flox_s_CD4-Cre_12_48h_SL2765
Th17_c-Maf_ko_flox_s_CD4-Cre_13_48h_SL4220
Th17_c-Maf_wt_pCD4-Cre_12_48h_SL2763
Th17_c-Maf_wt_pCD4-Cre_13_48h_SL4218
Th17_Fosl2_flfl_CD4-Cre_48h_SL11896
Th17_Fosl2_flfl_CD4-Cre_48h_SL12530
Th17_Fosl2_pp_CD4-Cre_48h_SL11894
Th17_Fosl2_pp_CD4-Cre_48h_SL12528
Th17_Hif1a_flfl_CD4-Cre_48h_SL11892
Th17_Hif1a_flfl_CD4-Cre_48h_SL12366
Th17_Hif1a_pp_CD4-Cre_48h_SL11890
Th17_Hif1a_pp_CD4-Cre_48h_SL12364
Th17_Ikzf3_mm_18_48h_SL6496
Th17_Ikzf3_pp_18_48h_SL6494
Th17_IMDM_siJmjd3_24h_SL11672
Th17_IMDM_siJmjd3_24h_SL11675
Th17_IMDM_siNonTarget_2_24h_SL11671
Th17_IMDM_siNonTarget_2_24h_SL11674
Th17_IMDM_siRorc_24h_SL11673
Th17_IMDM_siRorc_24h_SL11676
Th17_IRF4_ko_flox_s_CD4-Cre_4_48h_SL1863
Th17_IRF4_ko_mm_5_48h_SL2777
Th17_IRF4_ko_mm_6_48h_SL3310
Th17_IRF4_wt_pCD4-Cre_4_48h_SL1861
Th17_IRF4_wt_pp_5_48h_SL2775
Th17_IRF4_wt_pp_6_48h_SL3308
Th17_Nrf2_mm_48h_SL12370
Th17_Nrf2_mm_48h_SL12372
Th17_Nrf2_pp_48h_SL12368
Th17_RORa_BM_transfer_w_RORg_inhibitor_ko_mm_C16_15_48h_SL5057
Th17_RORa_BM_transfer_w_RORg_inhibitor_ko_mm_DMSO_15_48h_SL5056
Th17_RORa_BM_transfer_w_RORg_inhibitor_ko_mm_N2_15_48h_SL5058
Th17_RORa_BM_transfer_w_RORg_inhibitor_wt_pp_C16_15_48h_SL5052
Th17_RORa_BM_transfer_w_RORg_inhibitor_wt_pp_DMSO_15_48h_SL5051
Th17_RORa_BM_transfer_w_RORg_inhibitor_wt_pp_N2_15_48h_SL5053
Th17_RORa_RORg_BM_transfer_RORa_ko_RORg_ko_16_48h_SL5876
Th17_RORa_RORg_BM_transfer_RORa_ko_RORg_ko_17_48h_SL5880
Th17_RORa_RORg_BM_transfer_RORa_RORg_wt_16_48h_SL5874
Th17_RORa_RORg_BM_transfer_RORa_RORg_wt_17_48h_SL5878
Th17_RORg_ko_GFP_KI_1_16h_SL600
Th17_RORg_ko_GFP_KI_2_48h_SL1846
Th17_RORg_ko_GFP_KI_3_48h_SL2682
Th17_RORg_w_RORg_inhibitor_ko_GFP_KI_C16_14_48h_SL5047
Th17_RORg_w_RORg_inhibitor_ko_GFP_KI_DMSO_14_48h_SL5046
Th17_RORg_w_RORg_inhibitor_ko_GFP_KI_N2_14_48h_SL5048
Th17_RORg_wt_pp_1_16h_SL599
Th17_RORg_wt_pp_2_48h_SL1844
Th17_RORg_wt_pp_3_48h_SL2680
Th17_RPMI_Etv6_24h_SL11678
Th17_RPMI_Etv6_24h_SL11683
Th17_RPMI_siCntl_24h_SL11677
Th17_RPMI_siCntl_24h_SL11682
Th17_RPMI_siCntl_48h_SL11687
Th17_RPMI_siCntl_48h_SL11692
Th17_RPMI_siEtv6_48h_SL11688
Th17_RPMI_siEtv6_48h_SL11693
Th17_RPMI_siJmjd3_24h_SL11679
Th17_RPMI_siJmjd3_24h_SL11684
Th17_RPMI_siJmjd3_48h_SL11689
Th17_RPMI_siJmjd3_48h_SL11694
Th17_RPMI_siJmjd6_24h_SL11680
Th17_RPMI_siJmjd6_24h_SL11685
Th17_RPMI_siJmjd6_48h_SL11690
Th17_RPMI_siJmjd6_48h_SL11703
Th17_RPMI_siRorc_24h_SL11681
Th17_RPMI_siRorc_24h_SL11686
Th17_RPMI_siRorc_48h_SL11691
Th17_RPMI_siRorc_48h_SL11704
Th17_siAes_24h_SL13401
Th17_siAesb_24h_SL13402
Th17_siAtf6_24h_SL13381
Th17_siAtf6_24h_SL13382
Th17_siBcl11b_24h_SL13409
Th17_siBcl11bb_24h_SL13410
Th17_siCcr6_24h_SL13419
Th17_siCcr6_24h_SL13420
Th17_siCcr6_24h_SL13421
Th17_siCrem_24h_SL13397
Th17_siCremb_24h_SL13398
Th17_siDdit3_24h_SL13399
Th17_siDdit3b_24h_SL13400
Th17_siEgr2_24h_SL13407
Th17_siEgr2b_24h_SL13408
Th17_siEtv6_24h_SL13391
Th17_siEtv6_24h_SL13392
Th17_siFosl2_24h_SL13395
Th17_siFosl2_24h_SL13396
Th17_siId2_24h_SL13375
Th17_siId2_24h_SL13376
Th17_siInhba_24h_SL13403
Th17_siInhbab_24h_SL13404
Th17_siJmjd3_24h_SL13411
Th17_siJmjd3_24h_SL13412
Th17_siJmjd6_24h_SL13413
Th17_siJmjd6_24h_SL13414
Th17_siLef1_24h_SL13377
Th17_siLef1_24h_SL13378
Th17_siNfatc2_24h_SL13393
Th17_siNfatc2_24h_SL13394
Th17_siNonTarget2_24h_SL13369
Th17_siNonTarget2_24h_SL13370
Th17_siNonTarget2_24h_SL13371
Th17_siNonTarget2_24h_SL13372
Th17_siNonTarget2_24h_SL13373
Th17_siNonTarget2b_24h_SL13374
Th17_siPrkrir_24h_SL13387
Th17_siPrkrir_24h_SL13388
Th17_siRorc_24h_SL13415
Th17_siRorc_24h_SL13416
Th17_siRorc_24h_SL13417
Th17_siRorc_24h_SL13418
Th17_siSatb1_24h_SL13389
Th17_siSatb1_24h_SL13390
Th17_siSirt2_24h_SL13385
Th17_siSirt2_24h_SL13386
Th17_siSki_24h_SL13379
Th17_siSki_24h_SL13380
Th17_siTrib3_24h_SL13383
Th17_siTrib3_24h_SL13384
Th17_siZfp36l2_24h_SL13405
Th17_siZfp36l2b_24h_SL13406
Th17_STAT3_ko_flox_s_CD4-Cre_7_48h_SL1850
Th17_STAT3_ko_flox_s_CD4-Cre_8_48h_SL2675
Th17_STAT3_wt_pCD4-Cre_7_48h_SL1848
Th17_STAT3_wt_pCD4-Cre_8_48h_SL3541
Th17_wt_12h_SL1855
Th17_wt_16h_SL1856
Th17_wt_16h_SL8353
Th17_wt_16h_SL8355
Th17_wt_1h_SL1851
Th17_wt_24h_SL1857
Th17_wt_3h_SL1852
Th17_wt_48h_SL1858
Th17_wt_6h_SL1853
Th17_wt_9h_SL1854
th17N_48h_Dig_150817
th17N_48h_Dig_150829
th17N_48h_Veh_150817
th17N_48h_Veh_150829
th17N_96h_Dig_150719
th17N_96h_Dig_150729
th17N_96h_Dig_150812
th17N_96h_Veh_150729
th17N_96h_Veh_150812
th17P_48h_Dig_150817
th17P_48h_Dig_150829
th17P_48h_Veh_150817
th17P_48h_Veh_150829
th17P_96h_Dig_150719
th17P_96h_Dig_150729
th17P_96h_Dig_150812
th17P_96h_Veh_150729
th17P_96h_Veh_150812
Th2_IMDM_wt_48h_SL2684
Th2_IMDM_wt_48h_SL3306
Tr1_72h_35
Tr1_72h_39
Tr1_72h_40
Tr1_72h_41
Tr1_BatfKo_72h_38
Tr1_BatfKo_72h_39
Tr1_Irf1Ko_72h_36
Tr1_Irf1Ko_72h_42
Tr1_Irf1Ko_72h_43
