# Supplementary material for: Leveraging chromatin accessibility for transcriptional regulatory network inference in T Helper 17 Cells
Source: Genome Res. 2019 Mar;29(3):449–63. doi: 10.1101/gr.238253.118 (PMC6396413; doi:10.1101/gr.238253.118)
Supplement: Supplemental Material [file supp_gr.238253.118_Supplemental_Table_S5.xlsx]

## Sheet: Table S5 Legend
Table S5. Final KO+ChIP+ATAC and ATAC-only TRNs.

## Sheet: ChIP_A17_KOall_ATh_bias50_maxCo
TF	Target	SignedQuantile	AveStability	AvePCorr	stroke	stroke-width	stroke-dasharray
E2f4	Wdr76	0.99996	50.42	0.919	rgb(227, 42, 43)	1.9996	None
Irf7	Rtp4	0.99996	50.44	0.937	rgb(227, 38, 40)	2	None
Srebf1	Fads2	0.99993	50.35	0.846	rgb(226, 55, 57)	1.9982	2,2
Stat3	Tnip2	0.99993	50.39	0.891	rgb(227, 47, 49)	1.999	None
Irf1	Nlrc5	0.99989	50.34	0.844	rgb(226, 56, 57)	1.998	None
Irf7	Rsad2	0.99989	50.34	0.838	rgb(226, 57, 59)	1.998	None
E2f4	E2f7	0.99981	50.37	0.874	rgb(227, 50, 52)	1.9986	None
Hif1a	Egln1	0.99981	50.37	0.874	rgb(227, 50, 52)	1.9986	None
Stat3	Timp1	0.99981	50.37	0.868	rgb(227, 51, 53)	1.9986	None
Tbx21	Tbkbp1	0.99981	50.32	0.822	rgb(226, 60, 62)	1.9976	2,2
Sp2	Psmd8	-0.9998	50.31	-0.81	rgb( 41,110,248)	1.9974	None
Srebf1	Sqle	0.99978	50.3	0.803	rgb(226, 64, 65)	1.9972	None
Hif1a	Aldoc	0.99972	50.35	0.847	rgb(226, 55, 57)	1.9982	None
Hif1a	Slc2a1	0.99972	50.35	0.852	rgb(226, 54, 56)	1.9982	None
Stat3	Ncs1	0.99972	50.35	0.855	rgb(226, 54, 55)	1.9982	None
Lef1	Rps6ka4	0.99968	50.34	0.84	rgb(226, 57, 58)	1.998	None
Stat3	Nsf	0.99968	50.34	0.836	rgb(226, 57, 59)	1.998	None
Elf1	Pde7a	0.99959	50.29	0.792	rgb(226, 66, 67)	1.997	None
Irf7	Xaf1	0.99959	50.29	0.789	rgb(226, 66, 68)	1.997	None
Rorc	C2cd4d	0.99959	50.29	0.794	rgb(226, 65, 67)	1.997	None
Sp2	Brd3	0.99959	50.29	0.786	rgb(226, 67, 68)	1.997	None
Srf	Adarb1	0.99959	50.29	0.791	rgb(226, 66, 67)	1.997	None
Hif1a	Ero1l	0.99953	50.33	0.83	rgb(226, 58, 60)	1.9978	None
Hif1a	Hk1	0.99953	50.33	0.827	rgb(226, 59, 61)	1.9978	None
Stat3	Bcl3	0.99953	50.33	0.834	rgb(226, 58, 59)	1.9978	None
Elf1	Arhgef6	0.99948	50.28	0.784	rgb(226, 67, 69)	1.9968	None
Irf1	Tbx21	0.99948	50.28	0.78	rgb(226, 68, 70)	1.9968	2,2
Irf5	Gna15	0.99948	50.28	0.784	rgb(226, 67, 69)	1.9968	None
Hif1a	Pgm2	0.9994	50.32	0.82	rgb(226, 60, 62)	1.9976	None
Hif1a	Ppme1	0.9994	50.32	0.824	rgb(226, 60, 61)	1.9976	None
Hif1a	Smtnl2	0.9994	50.32	0.825	rgb(226, 59, 61)	1.9976	None
Ikzf3	Fastkd2	-0.9994	50.32	-0.82	rgb( 40,109,248)	1.9976	None
Hif1a	H2-Ab1	0.99937	50.31	0.809	rgb(226, 63, 64)	1.9974	None
Hif1a	P4ha2	0.99937	50.31	0.812	rgb(226, 62, 64)	1.9974	None
Hic1	Itga4	0.99927	50.27	0.771	rgb(225, 70, 71)	1.9966	None
Hsf1	Smyd5	0.99927	50.27	0.771	rgb(225, 70, 71)	1.9966	None
Irf1	Gbp6	0.99927	50.27	0.769	rgb(225, 70, 72)	1.9966	None
Tcf12	Mycbp2	0.99927	50.27	0.77	rgb(225, 70, 71)	1.9966	None
Zfp629	Ttbk2	0.99927	50.28	0.777	rgb(226, 69, 70)	1.9968	2,2
Hif1a	Ccr5	0.99924	50.26	0.757	rgb(225, 72, 74)	1.9964	None
Irf9	Irf7	0.99924	50.26	0.758	rgb(225, 72, 74)	1.9964	None
Atf6	Rps14	0.99916	50.3	0.799	rgb(226, 64, 66)	1.9972	None
Atf6	Xpnpep1	-0.99916	50.3	-0.8	rgb( 43,111,247)	1.9972	None
Hif1a	Pfkp	0.99916	50.3	0.803	rgb(226, 64, 65)	1.9972	None
Stat3	Klhl6	0.99916	50.3	0.796	rgb(226, 65, 67)	1.9972	None
Hif1a	Mfsd2a	0.99907	50.25	0.75	rgb(225, 74, 75)	1.9962	None
Irf7	I830012O16Rik	0.99907	50.25	0.75	rgb(225, 74, 75)	1.9962	2,2
Irf7	Ifit3	0.99907	50.25	0.754	rgb(225, 73, 75)	1.9962	None
Smad4	Itpr3	0.99907	50.25	0.748	rgb(225, 74, 76)	1.9962	None
Zfp385a	Eng	0.99907	50.26	0.757	rgb(225, 72, 74)	1.9964	2,2
Irf7	Cmpk2	0.99898	50.24	0.736	rgb(225, 76, 78)	1.996	None
Irf7	Pydc4	0.99898	50.24	0.735	rgb(225, 77, 78)	1.996	None
Mxd3	Cdc25b	0.99898	50.24	0.741	rgb(225, 75, 77)	1.996	2,2
Mxi1	Ndufv3	0.99898	50.24	0.736	rgb(225, 76, 78)	1.996	None
Nfkb2	Psd	0.99898	50.24	0.742	rgb(225, 75, 77)	1.996	None
Atf6	Txndc17	0.99875	50.29	0.787	rgb(226, 67, 68)	1.997	None
Batf	Batf	0.99875	50.29	0.79	rgb(226, 66, 68)	1.997	None
Hif1a	2310022B05Rik	0.99875	50.29	0.79	rgb(226, 66, 68)	1.997	None
Hif1a	Jmjd6	0.99875	50.29	0.787	rgb(226, 67, 68)	1.997	None
Hif1a	P4hb	0.99875	50.29	0.791	rgb(226, 66, 67)	1.997	None
Ikzf3	Arhgef10	0.99875	50.29	0.791	rgb(226, 66, 68)	1.997	None
Irf4	Prkd3	-0.99875	50.29	-0.79	rgb( 47,113,247)	1.997	None
Stat3	Gem	0.99875	50.29	0.791	rgb(226, 66, 67)	1.997	None
Stat3	Il21	0.99875	50.29	0.795	rgb(226, 65, 67)	1.997	None
Stat3	Sbno2	0.99875	50.29	0.792	rgb(226, 66, 67)	1.997	None
Stat3	Tspan5	0.99875	50.29	0.794	rgb(226, 65, 67)	1.997	None
Zfp367	Dtl	0.99875	50.29	0.791	rgb(226, 66, 67)	1.997	2,2
Elf1	Dock11	0.99866	50.23	0.728	rgb(225, 78, 79)	1.9958	None
Foxs1	Mylk2	0.99866	50.23	0.734	rgb(225, 77, 78)	1.9958	2,2
Irf1	Igtp	0.99866	50.23	0.727	rgb(225, 78, 80)	1.9958	None
Sp110	Cdkn2d	0.99866	50.23	0.728	rgb(225, 78, 79)	1.9958	2,2
Srebf1	Flna	0.99866	50.23	0.728	rgb(225, 78, 79)	1.9958	None
Hif1a	Bnip3	0.99858	50.28	0.779	rgb(226, 68, 70)	1.9968	None
Hif1a	Hk2	0.99858	50.28	0.778	rgb(226, 68, 70)	1.9968	None
Ikzf3	Thoc3	-0.99858	50.28	-0.78	rgb( 48,114,247)	1.9968	None
Irf4	Ada	0.99858	50.28	0.777	rgb(226, 69, 70)	1.9968	None
Atf5	Minpp1	-0.99834	50.22	-0.72	rgb( 62,123,244)	1.9956	2,2
E2f4	Hspb11	-0.99834	50.22	-0.72	rgb( 61,122,244)	1.9956	None
Foxs1	Vax2	0.99834	50.22	0.715	rgb(225, 80, 82)	1.9956	2,2
Hhex	Trpm6	0.99834	50.27	0.772	rgb(225, 70, 71)	1.9966	None
Hif1a	Mboat2	0.99834	50.27	0.77	rgb(225, 70, 71)	1.9966	None
Hif1a	Pafah1b3	0.99834	50.27	0.769	rgb(225, 70, 72)	1.9966	None
Irf7	Gm6548	0.99834	50.22	0.721	rgb(225, 79, 81)	1.9956	2,2
Irf7	Ifit1	0.99834	50.22	0.721	rgb(225, 79, 81)	1.9956	None
Rxra	Myo18a	0.99834	50.22	0.72	rgb(225, 80, 81)	1.9956	None
Stat3	Chmp4b	0.99834	50.27	0.768	rgb(225, 70, 72)	1.9966	None
Stat3	Malt1	0.99834	50.27	0.771	rgb(225, 70, 71)	1.9966	None
Yy2	Smek1	0.99834	50.22	0.723	rgb(225, 79, 80)	1.9956	None
Zfp369	Zfpm1	-0.99834	50.22	-0.72	rgb( 61,122,244)	1.9956	None
Ahrr	Cyp1b1	0.99819	50.21	0.711	rgb(225, 81, 83)	1.9953	2,2
Jun	Stat5b	0.99819	50.21	0.711	rgb(225, 81, 83)	1.9953	None
Junb	Hook2	0.99819	50.21	0.713	rgb(225, 81, 82)	1.9953	None
Rxra	Ptger4	0.99819	50.21	0.712	rgb(225, 81, 83)	1.9953	None
Sox5	Tbc1d30	-0.99819	50.21	-0.71	rgb( 63,124,244)	1.9953	None
Sp4	Ptpn2	0.99819	50.21	0.708	rgb(225, 82, 83)	1.9953	None
Stat2	Igtp	0.99819	50.21	0.707	rgb(225, 82, 83)	1.9953	None
Zfp385a	Abhd4	0.99819	50.21	0.71	rgb(225, 81, 83)	1.9953	2,2
Dbp	Ramp3	0.99801	50.26	0.758	rgb(225, 72, 74)	1.9964	None
E2f1	Slfn3	0.99801	50.26	0.759	rgb(225, 72, 74)	1.9964	None
E2f4	Rfwd3	0.99801	50.26	0.755	rgb(225, 73, 74)	1.9964	None
Etv6	Ppp1r13l	-0.99801	50.26	-0.76	rgb( 52,117,246)	1.9964	None
Hif1a	Aldoa	0.99801	50.26	0.761	rgb(225, 72, 73)	1.9964	None
Irf4	Exoc2	-0.99801	50.26	-0.76	rgb( 52,117,246)	1.9964	None
Irf4	Fam160a1	-0.99801	50.26	-0.76	rgb( 52,116,246)	1.9964	2,2
Irf4	Myo1e	-0.99801	50.26	-0.76	rgb( 53,117,246)	1.9964	None
Irf4	Nrp1	-0.99801	50.26	-0.76	rgb( 51,116,246)	1.9964	None
Irf4	Rasgrp1	-0.99801	50.26	-0.76	rgb( 52,117,246)	1.9964	None
Elf1	Rassf3	0.99769	50.2	0.699	rgb(225, 83, 85)	1.9951	None
Hif1a	Pgam1	0.99769	50.25	0.746	rgb(225, 75, 76)	1.9962	None
Hsf1	Rwdd2a	-0.99769	50.2	-0.7	rgb( 64,124,244)	1.9951	None
Ikzf3	Gatsl3	0.99769	50.25	0.752	rgb(225, 73, 75)	1.9962	None
Ikzf3	Sumf2	-0.99769	50.25	-0.75	rgb( 54,118,246)	1.9962	None
Irf1	Fam26f	0.99769	50.2	0.704	rgb(225, 83, 84)	1.9951	None
Irf1	Gbp5	0.99769	50.2	0.697	rgb(225, 84, 85)	1.9951	None
Irf4	Abcd3	-0.99769	50.2	-0.7	rgb( 64,124,244)	1.9951	None
Irf4	Irf4	0.99769	50.25	0.746	rgb(225, 75, 76)	1.9962	None
Irf7	2010002M12Rik	0.99769	50.2	0.704	rgb(225, 83, 84)	1.9951	2,2
Mxi1	Ppp1r13l	0.99769	50.2	0.704	rgb(225, 83, 84)	1.9951	None
Plagl2	R3hdm1	0.99769	50.2	0.695	rgb(225, 84, 86)	1.9951	None
Rorc	Lingo4	0.99769	50.2	0.703	rgb(225, 83, 84)	1.9951	2,2
Rxra	Slain1	0.99769	50.2	0.702	rgb(225, 83, 84)	1.9951	None
Smad3	Ctsw	0.99769	50.25	0.755	rgb(225, 73, 74)	1.9962	None
Stat3	Flot1	0.99769	50.25	0.749	rgb(225, 74, 76)	1.9962	None
Stat3	Sfmbt2	-0.99769	50.25	-0.75	rgb( 55,119,245)	1.9962	None
Atf6	Dpm3	0.99754	50.24	0.74	rgb(225, 76, 77)	1.996	None
Hif1a	Gys1	0.99754	50.24	0.738	rgb(225, 76, 77)	1.996	None
Hif1a	Kremen2	0.99754	50.24	0.744	rgb(225, 75, 76)	1.996	None
Ikzf3	Rpp14	-0.99754	50.24	-0.74	rgb( 57,120,245)	1.996	None
Irf4	Extl3	-0.99754	50.24	-0.74	rgb( 57,120,245)	1.996	None
Irf4	Wnt1	-0.99754	50.24	-0.74	rgb( 57,120,245)	1.996	None
Nr1d1	Impg2	0.99754	50.24	0.743	rgb(225, 75, 77)	1.996	None
Stat3	Efemp2	0.99754	50.24	0.737	rgb(225, 76, 78)	1.996	None
C030039L03Rik	Muc2	0.99717	50.19	0.687	rgb(225, 86, 87)	1.9949	2,2
Cebpz	Dhx33	0.99717	50.19	0.691	rgb(225, 85, 86)	1.9949	2,2
Crem	Galc	0.99717	50.19	0.69	rgb(225, 85, 87)	1.9949	None
Ddit3	Sars	0.99717	50.19	0.689	rgb(225, 85, 87)	1.9949	2,2
Etv6	Cyfip2	-0.99717	50.23	-0.73	rgb( 58,121,245)	1.9958	None
Foxp4	Syf2	-0.99717	50.19	-0.69	rgb( 66,125,243)	1.9949	None
Hif1a	Bcar1	0.99717	50.23	0.73	rgb(225, 78, 79)	1.9958	None
Irf1	Gm4841	0.99717	50.19	0.688	rgb(225, 86, 87)	1.9949	2,2
Irf4	Chst15	0.99717	50.19	0.688	rgb(225, 86, 87)	1.9949	None
Irf4	Neto1	-0.99717	50.23	-0.73	rgb( 59,121,245)	1.9958	None
Irf4	Nqo2	-0.99717	50.23	-0.73	rgb( 58,120,245)	1.9958	None
Jun	Kdelc2	-0.99717	50.19	-0.69	rgb( 68,126,243)	1.9949	None
Maf	Fam20a	0.99717	50.19	0.695	rgb(225, 84, 86)	1.9949	None
Maf	Pdpn	0.99717	50.19	0.689	rgb(225, 85, 87)	1.9949	None
Nfe2l2	Lrp8	0.99717	50.23	0.734	rgb(225, 77, 78)	1.9958	None
Sp110	Bcl2a1b	0.99717	50.19	0.692	rgb(225, 85, 86)	1.9949	2,2
Sp2	Crtc1	0.99717	50.19	0.69	rgb(225, 85, 87)	1.9949	None
Zfp148	Zfp609	0.99717	50.19	0.687	rgb(225, 86, 87)	1.9949	None
Zfp367	Exo1	0.99717	50.23	0.733	rgb(225, 77, 78)	1.9958	2,2
Zfp808	Hist1h1e	-0.99717	50.19	-0.69	rgb( 68,126,243)	1.9949	2,2
Ddit3	Insl3	0.99702	50.22	0.723	rgb(225, 79, 80)	1.9956	None
Hif1a	Higd1a	0.99702	50.22	0.715	rgb(225, 80, 82)	1.9956	None
Hif1a	Plekha2	0.99702	50.22	0.724	rgb(225, 79, 80)	1.9956	None
Ikzf3	Ing2	0.99702	50.22	0.721	rgb(225, 79, 81)	1.9956	None
Irf4	Samsn1	-0.99702	50.22	-0.72	rgb( 62,122,244)	1.9956	None
Maf	Il3	-0.99702	50.22	-0.72	rgb( 61,122,244)	1.9956	None
Stat3	Il1r1	0.99702	50.22	0.724	rgb(225, 79, 80)	1.9956	None
Stat3	Lamc2	0.99702	50.22	0.724	rgb(225, 79, 80)	1.9956	None
Bhlhe40	Kdelc2	0.99681	50.18	0.677	rgb(224, 88, 89)	1.9947	None
Cebpg	Pck2	0.99681	50.18	0.677	rgb(224, 88, 89)	1.9947	2,2
Etv6	Rasgrp1	-0.99681	50.18	-0.68	rgb( 70,128,243)	1.9947	None
Irf1	Erap1	0.99681	50.18	0.682	rgb(224, 87, 88)	1.9947	None
Irf1	Gbp2	0.99681	50.18	0.685	rgb(225, 86, 88)	1.9947	None
Rest	Rbm15	0.99681	50.18	0.681	rgb(224, 87, 88)	1.9947	None
Vax2	Avpi1	0.99681	50.18	0.681	rgb(224, 87, 88)	1.9947	None
Vax2	Il17re	0.99681	50.18	0.685	rgb(225, 86, 88)	1.9947	2,2
Zbtb7a	Lrfn1	0.99681	50.18	0.678	rgb(224, 87, 89)	1.9947	None
Zfp329	Gripap1	0.99681	50.18	0.681	rgb(224, 87, 88)	1.9947	2,2
Zfp467	Wnt10a	0.99681	50.18	0.676	rgb(224, 88, 89)	1.9947	None
Atf6	Syf2	0.99655	50.21	0.713	rgb(225, 81, 82)	1.9953	None
E2f4	Arhgap33	0.99655	50.21	0.708	rgb(225, 82, 83)	1.9953	None
Hif1a	Cep170	0.99655	50.21	0.71	rgb(225, 81, 83)	1.9953	None
Hif1a	Pygl	0.99655	50.21	0.713	rgb(225, 81, 82)	1.9953	None
Hif1a	Sertad1	0.99655	50.21	0.709	rgb(225, 82, 83)	1.9953	None
Irf4	Atp8b4	-0.99655	50.21	-0.71	rgb( 62,123,244)	1.9953	None
Irf4	Tnik	-0.99655	50.21	-0.71	rgb( 63,123,244)	1.9953	None
Jdp2	Lrrc24	0.99655	50.21	0.708	rgb(225, 82, 83)	1.9953	None
Klf6	Vim	0.99655	50.21	0.708	rgb(225, 82, 83)	1.9953	2,2
Maf	Ifih1	-0.99655	50.21	-0.71	rgb( 62,123,244)	1.9953	None
Six1	Tgfbr1	0.99655	50.21	0.712	rgb(225, 81, 82)	1.9953	2,2
Stat3	Gatm	0.99655	50.21	0.715	rgb(225, 80, 82)	1.9953	None
Stat3	Tgm2	0.99655	50.21	0.708	rgb(225, 82, 83)	1.9953	None
Zfp385a	Zmat3	0.99655	50.21	0.705	rgb(225, 82, 84)	1.9953	2,2
Ahctf1	Zcchc2	0.99618	50.17	0.673	rgb(224, 88, 90)	1.9945	None
Etv6	Il12rb1	0.99618	50.17	0.668	rgb(224, 89, 91)	1.9945	None
Fosl2	Sema6b	0.99618	50.17	0.669	rgb(224, 89, 91)	1.9945	None
Fosl2	Slc39a1	0.99618	50.17	0.67	rgb(224, 89, 90)	1.9945	None
Fosl2	Tgm2	0.99618	50.17	0.67	rgb(224, 89, 90)	1.9945	None
Gfi1	Rgmb	-0.99618	50.17	-0.67	rgb( 72,129,242)	1.9945	None
Hsf1	Npc2	-0.99618	50.17	-0.67	rgb( 72,129,242)	1.9945	None
Irf1	Gbp7	0.99618	50.17	0.672	rgb(224, 89, 90)	1.9945	None
Irf4	Nrgn	-0.99618	50.17	-0.67	rgb( 72,129,242)	1.9945	None
Irf5	Alpk1	0.99618	50.17	0.666	rgb(224, 90, 91)	1.9945	None
Irf7	Ccl5	0.99618	50.17	0.669	rgb(224, 89, 91)	1.9945	None
Prrx1	Cav1	0.99618	50.17	0.674	rgb(224, 88, 90)	1.9945	2,2
Rela	Ifit2	-0.99618	50.17	-0.67	rgb( 71,128,243)	1.9945	None
Runx2	Galnt3	0.99618	50.17	0.668	rgb(224, 89, 91)	1.9945	None
Srf	Smg5	0.99618	50.17	0.67	rgb(224, 89, 90)	1.9945	None
Stat4	Epsti1	0.99618	50.17	0.671	rgb(224, 89, 90)	1.9945	None
Zfp277	Tmem35	0.99618	50.17	0.667	rgb(224, 90, 91)	1.9945	2,2
Zfp385a	Rnf169	0.99618	50.17	0.669	rgb(224, 89, 90)	1.9945	2,2
Zfp536	Lpin3	0.99618	50.19	0.687	rgb(225, 86, 87)	1.9949	2,2
Zik1	Mvp	-0.99618	50.17	-0.67	rgb( 72,129,242)	1.9945	2,2
E2f4	Mxd3	0.99592	50.2	0.699	rgb(225, 83, 85)	1.9951	None
Hif1a	3110057O12Rik	0.99592	50.2	0.702	rgb(225, 83, 84)	1.9951	2,2
Hif1a	Fzd7	0.99592	50.2	0.703	rgb(225, 83, 84)	1.9951	None
Hif1a	Ppp1r3b	0.99592	50.2	0.701	rgb(225, 83, 84)	1.9951	None
Hif1a	Ppp1r3g	0.99592	50.2	0.695	rgb(225, 84, 86)	1.9951	2,2
Hif1a	Rassf1	0.99592	50.2	0.699	rgb(225, 84, 85)	1.9951	None
Ikzf3	Pank2	0.99592	50.2	0.699	rgb(225, 84, 85)	1.9951	None
Irf4	A1cf	-0.99592	50.2	-0.7	rgb( 66,125,243)	1.9951	None
Irf4	Ttn	-0.99592	50.2	-0.7	rgb( 66,125,243)	1.9951	None
Maf	Nipal1	0.99592	50.2	0.701	rgb(225, 83, 84)	1.9951	None
Smad3	Ptgfrn	0.99592	50.2	0.697	rgb(225, 84, 85)	1.9951	None
Stat3	Chm	0.99592	50.2	0.702	rgb(225, 83, 84)	1.9951	None
Stat3	Hpcal4	0.99592	50.2	0.7	rgb(225, 83, 85)	1.9951	None
Stat3	Ppm1j	0.99592	50.2	0.7	rgb(225, 83, 85)	1.9951	None
Irf4	Qpct	-0.99571	50.19	-0.69	rgb( 67,126,243)	1.9949	None
Irf4	Sesn1	-0.99571	50.19	-0.69	rgb( 68,126,243)	1.9949	None
Irf4	Trpm1	-0.99571	50.19	-0.69	rgb( 67,126,243)	1.9949	None
Maf	St3gal1	-0.99571	50.19	-0.69	rgb( 67,126,243)	1.9949	None
Rorc	Furin	0.99571	50.19	0.688	rgb(225, 86, 87)	1.9949	None
Rorc	Wdfy2	0.99571	50.19	0.692	rgb(225, 85, 86)	1.9949	None
Smad3	Apol9b	0.99571	50.19	0.689	rgb(225, 85, 87)	1.9949	2,2
Stat3	Dpep2	0.99571	50.19	0.689	rgb(225, 85, 87)	1.9949	None
Stat3	Fosl2	0.99571	50.19	0.687	rgb(225, 86, 87)	1.9949	None
Stat3	Frmd4b	0.99571	50.19	0.69	rgb(225, 85, 87)	1.9949	None
Stat3	Rnh1	0.99571	50.19	0.688	rgb(225, 86, 87)	1.9949	None
E2f1	Exo1	0.99527	50.16	0.664	rgb(224, 90, 91)	1.9943	None
Egr1	Egr2	0.99527	50.16	0.66	rgb(224, 91, 92)	1.9943	None
Elf1	Slain1	0.99527	50.16	0.658	rgb(224, 91, 93)	1.9943	None
Ets1	Pdcd1	-0.99527	50.16	-0.66	rgb( 74,130,242)	1.9943	None
Hbp1	Rpusd2	-0.99527	50.16	-0.66	rgb( 74,130,242)	1.9943	None
Irf1	Gbp10	0.99527	50.16	0.657	rgb(224, 92, 93)	1.9943	None
Irf1	Gbp4	0.99527	50.16	0.656	rgb(224, 92, 93)	1.9943	None
Irf1	Tgtp2	0.99527	50.16	0.663	rgb(224, 90, 92)	1.9943	None
Irf7	Gbp10	0.99527	50.16	0.662	rgb(224, 91, 92)	1.9943	None
Irf7	Oas1b	0.99527	50.16	0.658	rgb(224, 91, 93)	1.9943	None
Maf	Aqp3	0.99527	50.16	0.664	rgb(224, 90, 92)	1.9943	None
Mybl1	Gen1	0.99527	50.16	0.664	rgb(224, 90, 91)	1.9943	2,2
Nfkb2	Ets1	-0.99527	50.16	-0.66	rgb( 74,130,242)	1.9943	None
Ppard	Coro7	0.99527	50.16	0.659	rgb(224, 91, 92)	1.9943	None
Rxra	Fgf2	0.99527	50.16	0.664	rgb(224, 90, 92)	1.9943	None
Srebf1	Uqcrq	-0.99527	50.16	-0.66	rgb( 73,129,242)	1.9943	None
Srf	Ccdc107	-0.99527	50.16	-0.66	rgb( 74,130,242)	1.9943	None
Tcf7l1	Cyp2s1	0.99527	50.16	0.657	rgb(224, 91, 93)	1.9943	None
Tead1	Nupr1	0.99527	50.16	0.66	rgb(224, 91, 92)	1.9943	2,2
Xbp1	Gpatch4	-0.99527	50.16	-0.66	rgb( 74,130,242)	1.9943	2,2
Zfp148	Nr4a1	-0.99527	50.16	-0.66	rgb( 74,130,242)	1.9943	None
Zfp219	Dab2ip	0.99527	50.16	0.659	rgb(224, 91, 92)	1.9943	None
Zfp956	Ankrd23	0.99527	50.16	0.656	rgb(224, 92, 93)	1.9943	2,2
Zhx2	Sema6b	-0.99527	50.16	-0.66	rgb( 74,130,242)	1.9943	2,2
Creb1	Tsc22d3	0.99491	50.18	0.678	rgb(224, 87, 89)	1.9947	None
Ebf1	Rasal1	0.99491	50.18	0.682	rgb(225, 87, 88)	1.9947	None
Egr1	Hmgn1	0.99491	50.18	0.676	rgb(224, 88, 89)	1.9947	None
Etv6	E330009J07Rik	-0.99491	50.18	-0.68	rgb( 68,127,243)	1.9947	None
Fosl2	Stac2	0.99491	50.18	0.68	rgb(224, 87, 89)	1.9947	None
Gata3	Itgb3	0.99491	50.18	0.68	rgb(224, 87, 88)	1.9947	None
Hif1a	Mt1	0.99491	50.18	0.683	rgb(225, 87, 88)	1.9947	None
Hif1a	Ralb	0.99491	50.18	0.681	rgb(224, 87, 88)	1.9947	None
Hif1a	Rgs11	0.99491	50.18	0.678	rgb(224, 88, 89)	1.9947	None
Hif1a	Rnf181	0.99491	50.18	0.677	rgb(224, 88, 89)	1.9947	None
Irf4	Edaradd	-0.99491	50.18	-0.68	rgb( 70,128,243)	1.9947	None
Irf4	Pgrmc1	-0.99491	50.18	-0.68	rgb( 69,127,243)	1.9947	None
Irf4	Tmem71	-0.99491	50.18	-0.68	rgb( 70,127,243)	1.9947	None
Lyl1	Lix1l	0.99491	50.18	0.68	rgb(224, 87, 89)	1.9947	None
Maf	Neurl3	0.99491	50.18	0.684	rgb(225, 86, 88)	1.9947	None
Maf	Smad3	0.99491	50.18	0.684	rgb(225, 86, 88)	1.9947	None
Trp73	Rnf169	0.99491	50.18	0.682	rgb(225, 87, 88)	1.9947	None
Zeb2	Akr1b8	0.99491	50.18	0.679	rgb(224, 87, 89)	1.9947	2,2
Zfp948	Ankrd23	0.99491	50.18	0.682	rgb(225, 87, 88)	1.9947	2,2
Ahrr	Gpr15	0.99456	50.15	0.646	rgb(224, 94, 95)	1.9941	2,2
Cebpg	B930041F14Rik	-0.99456	50.15	-0.65	rgb( 76,131,242)	1.9941	None
E2f1	Wee1	0.99456	50.15	0.649	rgb(224, 93, 94)	1.9941	None
Egr1	Egr3	0.99456	50.15	0.653	rgb(224, 92, 94)	1.9941	None
Elf1	Cmah	0.99456	50.15	0.653	rgb(224, 92, 94)	1.9941	None
Elf1	Rcsd1	0.99456	50.15	0.645	rgb(224, 94, 95)	1.9941	None
Ets1	Cd2	0.99456	50.15	0.649	rgb(224, 93, 94)	1.9941	None
Ets2	Ifit2	0.99456	50.15	0.655	rgb(224, 92, 93)	1.9941	2,2
Hsf1	Sf3b3	0.99456	50.15	0.65	rgb(224, 93, 94)	1.9941	None
Irf7	BC094916	0.99456	50.15	0.649	rgb(224, 93, 94)	1.9941	None
Irf7	Oasl2	0.99456	50.15	0.646	rgb(224, 94, 95)	1.9941	None
Mbnl2	Inpp1	0.99456	50.15	0.654	rgb(224, 92, 93)	1.9941	2,2
Nfil3	Sntb1	-0.99456	50.15	-0.65	rgb( 77,132,242)	1.9941	None
Nfkb2	Csf2	0.99456	50.15	0.647	rgb(224, 93, 95)	1.9941	2,2
Rel	Slc29a3	0.99456	50.15	0.65	rgb(224, 93, 94)	1.9941	None
Rorc	Ccdc63	0.99456	50.15	0.65	rgb(224, 93, 94)	1.9941	None
Sp110	Ly6c1	0.99456	50.15	0.653	rgb(224, 92, 94)	1.9941	2,2
Srebf2	Dhcr24	0.99456	50.15	0.655	rgb(224, 92, 93)	1.9941	2,2
Tcf12	Kcnk7	-0.99456	50.15	-0.65	rgb( 76,131,242)	1.9941	None
Bcl11b	Asns	0.99421	50.17	0.669	rgb(224, 89, 91)	1.9945	None
Creb1	Gnptab	-0.99421	50.17	-0.67	rgb( 71,128,242)	1.9945	None
E2f4	Tpst1	0.99421	50.17	0.671	rgb(224, 89, 90)	1.9945	None
Egr1	Sumf2	0.99421	50.17	0.668	rgb(224, 89, 91)	1.9945	None
Gabpa	Fbxl21	-0.99421	50.17	-0.67	rgb( 72,129,242)	1.9945	None
Hif1a	Bend5	0.99421	50.17	0.671	rgb(224, 89, 90)	1.9945	None
Hif1a	Sap30	0.99421	50.17	0.666	rgb(224, 90, 91)	1.9945	None
Irf4	Aim1	0.99421	50.17	0.67	rgb(224, 89, 90)	1.9945	None
Irf4	Gm2762	-0.99421	50.17	-0.67	rgb( 72,129,242)	1.9945	None
Irf4	Hdac9	-0.99421	50.17	-0.67	rgb( 73,129,242)	1.9945	None
Irf4	Lrrn3	-0.99421	50.17	-0.67	rgb( 72,129,242)	1.9945	None
Irf4	Tnfsf10	-0.99421	50.17	-0.67	rgb( 72,129,242)	1.9945	None
Irf4	Twist1	-0.99421	50.17	-0.67	rgb( 72,129,242)	1.9945	None
Rorc	Igfbp7	0.99421	50.17	0.67	rgb(224, 89, 90)	1.9945	None
Satb1	Slc4a11	-0.99421	50.17	-0.67	rgb( 72,129,242)	1.9945	None
Six5	Qtrtd1	0.99421	50.17	0.673	rgb(224, 89, 90)	1.9945	None
Stat3	Ddr1	0.99421	50.17	0.667	rgb(224, 90, 91)	1.9945	None
Stat3	Hif1a	0.99421	50.17	0.67	rgb(224, 89, 90)	1.9945	None
Zfp292	Smek1	0.99421	50.17	0.672	rgb(224, 89, 90)	1.9945	2,2
Ahdc1	Zfp831	0.99394	50.14	0.638	rgb(224, 95, 96)	1.9939	2,2
Ankzf1	Arid3a	0.99394	50.14	0.635	rgb(224, 96, 97)	1.9939	2,2
Egr2	Runx1	0.99394	50.14	0.644	rgb(224, 94, 95)	1.9939	None
Ets1	Nlrc3	0.99394	50.14	0.637	rgb(224, 95, 97)	1.9939	None
Ets2	2018-09-09	-0.99394	50.14	-0.64	rgb( 78,132,241)	1.9939	None
Foxo3	E330009J07Rik	0.99394	50.14	0.64	rgb(224, 95, 96)	1.9939	None
Ikzf3	Il10	0.99394	50.14	0.64	rgb(224, 95, 96)	1.9939	None
Irf4	Lpcat1	-0.99394	50.14	-0.64	rgb( 79,133,241)	1.9939	None
Mybl1	Marcks	0.99394	50.14	0.643	rgb(224, 94, 96)	1.9939	None
Patz1	Arhgap10	0.99394	50.14	0.637	rgb(224, 95, 97)	1.9939	None
Rxra	Tmem154	0.99394	50.14	0.639	rgb(224, 95, 96)	1.9939	None
Sp4	Arhgdig	-0.99394	50.14	-0.64	rgb( 77,132,241)	1.9939	None
Sp4	Dctn4	0.99394	50.14	0.636	rgb(224, 96, 97)	1.9939	None
Zfp429	Megf8	-0.99394	50.14	-0.64	rgb( 79,133,241)	1.9939	2,2
Atf3	E2f7	0.9937	50.16	0.658	rgb(224, 91, 93)	1.9943	None
Hif1a	Arrb1	0.9937	50.16	0.663	rgb(224, 90, 92)	1.9943	None
Hif1a	Galk1	0.9937	50.16	0.664	rgb(224, 90, 91)	1.9943	None
Hif1a	Ier3	0.9937	50.16	0.656	rgb(224, 92, 93)	1.9943	None
Hif1a	Slc2a3	0.9937	50.16	0.662	rgb(224, 90, 92)	1.9943	None
Ikzf3	Il10ra	0.9937	50.16	0.658	rgb(224, 91, 93)	1.9943	None
Irf4	Rassf8	-0.9937	50.16	-0.66	rgb( 74,130,242)	1.9943	None
Nfe2l2	Atp1a1	0.9937	50.16	0.665	rgb(224, 90, 91)	1.9943	None
Rfx3	Mycbp2	-0.9937	50.16	-0.66	rgb( 73,129,242)	1.9943	None
Rorc	Vax2	0.9937	50.16	0.656	rgb(224, 92, 93)	1.9943	None
Stat3	Alpk2	0.9937	50.16	0.656	rgb(224, 92, 93)	1.9943	None
Stat3	Muc1	0.9937	50.16	0.664	rgb(224, 90, 91)	1.9943	None
Zfp385a	Ptp4a3	0.9937	50.16	0.657	rgb(224, 92, 93)	1.9943	2,2
Ahctf1	BC021614	-0.99324	50.13	-0.63	rgb( 80,134,241)	1.9937	None
Atf3	Atp11a	0.99324	50.13	0.626	rgb(224, 97, 99)	1.9937	2,2
Cebpg	Psph	0.99324	50.13	0.629	rgb(224, 97, 98)	1.9937	2,2
E2f4	Cox6b2	-0.99324	50.13	-0.63	rgb( 81,134,241)	1.9937	None
Ets1	Dmxl2	-0.99324	50.13	-0.63	rgb( 81,134,241)	1.9937	2,2
Etv4	Dusp9	0.99324	50.13	0.626	rgb(224, 98, 99)	1.9937	2,2
Hmgb1	AI506816	0.99324	50.13	0.631	rgb(224, 96, 98)	1.9937	2,2
Ikzf2	Trib1	0.99324	50.13	0.629	rgb(224, 97, 98)	1.9937	2,2
Irf4	Ptprf	0.99324	50.13	0.632	rgb(224, 96, 98)	1.9937	None
Irf4	Spry2	-0.99324	50.13	-0.63	rgb( 81,134,241)	1.9937	None
Irf7	Cxcl10	0.99324	50.13	0.635	rgb(224, 96, 97)	1.9937	None
Klf2	Gpr146	0.99324	50.13	0.632	rgb(224, 96, 97)	1.9937	None
Plagl1	Slc7a1	0.99324	50.13	0.625	rgb(224, 98, 99)	1.9937	None
Rfx1	Samsn1	-0.99324	50.13	-0.63	rgb( 80,134,241)	1.9937	None
Six5	Tes	-0.99324	50.13	-0.63	rgb( 80,134,241)	1.9937	None
Skil	Slco4a1	-0.99324	50.13	-0.63	rgb( 80,134,241)	1.9937	2,2
Sp2	Arhgap33	0.99324	50.13	0.628	rgb(224, 97, 98)	1.9937	None
Sp4	Nrf1	-0.99324	50.13	-0.63	rgb( 81,134,241)	1.9937	None
Srebf1	C2cd2l	0.99324	50.13	0.626	rgb(224, 97, 99)	1.9937	None
Tcf12	Mndal	0.99324	50.13	0.63	rgb(224, 97, 98)	1.9937	None
Tet2	Atad2b	0.99324	50.13	0.626	rgb(224, 97, 99)	1.9937	2,2
Yy2	Slfn3	0.99324	50.13	0.634	rgb(224, 96, 97)	1.9937	None
Zfhx3	Ermp1	0.99324	50.13	0.625	rgb(224, 98, 99)	1.9937	2,2
Zfp420	Scarf2	-0.99324	50.13	-0.63	rgb( 80,133,241)	1.9937	2,2
Zfx	Hspb11	-0.99324	50.13	-0.63	rgb( 81,134,241)	1.9937	None
Batf	Rdh10	-0.9929	50.15	-0.65	rgb( 76,131,242)	1.9941	None
Bcl6	Nedd4	0.9929	50.15	0.647	rgb(224, 93, 95)	1.9941	None
E2f4	Zranb3	0.9929	50.15	0.651	rgb(224, 93, 94)	1.9941	2,2
Etv6	Tmem184b	-0.9929	50.15	-0.65	rgb( 77,132,242)	1.9941	None
Hif1a	Cox7a1	0.9929	50.15	0.649	rgb(224, 93, 94)	1.9941	None
Hif1a	Fam71f2	0.9929	50.15	0.649	rgb(224, 93, 94)	1.9941	None
Irf4	Bmyc	-0.9929	50.15	-0.65	rgb( 77,132,242)	1.9941	None
Irf4	Ppp3ca	-0.9929	50.15	-0.65	rgb( 75,131,242)	1.9941	None
Irf4	Stra6	0.9929	50.15	0.65	rgb(224, 93, 94)	1.9941	None
Irf4	Tspan2	0.9929	50.15	0.654	rgb(224, 92, 93)	1.9941	None
Smad3	Lrrfip1	0.9929	50.15	0.652	rgb(224, 93, 94)	1.9941	None
Sp4	Abcg1	-0.9929	50.15	-0.65	rgb( 76,131,242)	1.9941	None
Stat3	Padi2	0.9929	50.15	0.654	rgb(224, 92, 93)	1.9941	None
Stat3	Plscr3	0.9929	50.15	0.653	rgb(224, 92, 94)	1.9941	None
Stat3	Sec14l1	0.9929	50.15	0.646	rgb(224, 94, 95)	1.9941	None
Zfp341	Pgm1	0.9929	50.15	0.649	rgb(224, 93, 94)	1.9941	2,2
Zfp429	Apold1	-0.9929	50.15	-0.65	rgb( 75,131,242)	1.9941	2,2
Zfp536	Tekt2	0.9929	50.15	0.65	rgb(224, 93, 94)	1.9941	2,2
E2f4	Slc4a8	0.99253	50.14	0.643	rgb(224, 94, 96)	1.9939	None
Gabpa	F730043M19Rik	-0.99253	50.14	-0.64	rgb( 77,132,241)	1.9939	None
Hif1a	Kcnk7	0.99253	50.14	0.644	rgb(224, 94, 95)	1.9939	None
Hif1a	Matk	0.99253	50.14	0.635	rgb(224, 96, 97)	1.9939	None
Irf4	Fas	-0.99253	50.14	-0.64	rgb( 78,132,241)	1.9939	None
Irf4	Olr1	-0.99253	50.14	-0.64	rgb( 77,132,241)	1.9939	None
Nfe2l2	Lrrc59	0.99253	50.14	0.644	rgb(224, 94, 95)	1.9939	None
Pcgf2	Bmyc	0.99253	50.14	0.636	rgb(224, 96, 97)	1.9939	2,2
Rorc	Cdk18	0.99253	50.14	0.643	rgb(224, 94, 96)	1.9939	None
Rorc	Il17a	0.99253	50.14	0.639	rgb(224, 95, 96)	1.9939	None
Rorc	Plac8	-0.99253	50.14	-0.64	rgb( 78,133,241)	1.9939	None
Stat3	Akr1b8	0.99253	50.14	0.638	rgb(224, 95, 96)	1.9939	None
Stat3	Creb3l2	0.99253	50.14	0.642	rgb(224, 94, 96)	1.9939	None
Stat3	Lrmp	-0.99253	50.14	-0.64	rgb( 79,133,241)	1.9939	None
Stat3	Nts	-0.99253	50.14	-0.64	rgb( 77,132,241)	1.9939	None
Stat3	Piwil2	0.99253	50.14	0.64	rgb(224, 95, 96)	1.9939	None
Stat3	Syn1	0.99253	50.14	0.642	rgb(224, 94, 96)	1.9939	None
Stat3	Zfp473	0.99253	50.14	0.643	rgb(224, 94, 95)	1.9939	None
Zfp787	Ocrl	-0.99253	50.14	-0.64	rgb( 78,132,241)	1.9939	2,2
Zkscan1	Kdelc2	0.99253	50.14	0.643	rgb(224, 94, 95)	1.9939	None
Ahrr	Pdpn	0.99189	50.12	0.617	rgb(224, 99,100)	1.9935	2,2
Cebpg	Slc7a3	0.99189	50.12	0.624	rgb(224, 98, 99)	1.9935	2,2
Crem	Pde4d	0.99189	50.12	0.616	rgb(224, 99,101)	1.9935	None
Elf1	Il2ra	-0.99189	50.12	-0.62	rgb( 83,136,240)	1.9935	None
Elf1	Stk4	0.99189	50.12	0.621	rgb(224, 98,100)	1.9935	None
Ets2	Flt3l	-0.99189	50.12	-0.62	rgb( 83,135,241)	1.9935	None
Irf2	Wipf1	0.99189	50.12	0.617	rgb(224, 99,100)	1.9935	None
Irf4	Abcb9	-0.99189	50.12	-0.62	rgb( 83,136,240)	1.9935	None
Irf7	Ccrl2	0.99189	50.12	0.619	rgb(224, 99,100)	1.9935	None
Irf7	Gbp9	0.99189	50.12	0.616	rgb(224, 99,101)	1.9935	None
Irf7	Isg20	0.99189	50.12	0.616	rgb(224, 99,101)	1.9935	None
Irf7	Mx1	0.99189	50.12	0.623	rgb(224, 98, 99)	1.9935	None
L3mbtl3	Piga	-0.99189	50.12	-0.62	rgb( 82,135,241)	1.9935	2,2
Lef1	Sbno2	-0.99189	50.12	-0.62	rgb( 83,136,240)	1.9935	None
Mxd4	Ypel3	0.99189	50.12	0.619	rgb(224, 99,100)	1.9935	2,2
Mxi1	Aen	-0.99189	50.12	-0.62	rgb( 83,136,240)	1.9935	None
Mxi1	Ypel5	0.99189	50.12	0.623	rgb(224, 98, 99)	1.9935	None
Myc	Lactb	-0.99189	50.12	-0.62	rgb( 81,135,241)	1.9935	None
Nr1d1	Galnt12	0.99189	50.12	0.619	rgb(224, 99,100)	1.9935	None
Nr4a1	Cdk6	-0.99189	50.12	-0.62	rgb( 82,135,241)	1.9935	None
Plagl1	Mex3a	0.99189	50.12	0.619	rgb(224, 99,100)	1.9935	2,2
Pou2af1	Map4k4	-0.99189	50.12	-0.62	rgb( 83,135,241)	1.9935	None
Pou2af1	Sh3bp1	-0.99189	50.12	-0.62	rgb( 81,135,241)	1.9935	None
Rxra	Ubash3a	0.99189	50.12	0.617	rgb(224, 99,100)	1.9935	None
Rxra	Zfp280b	0.99189	50.12	0.619	rgb(224, 99,100)	1.9935	None
Sox5	Mab21l2	0.99189	50.12	0.616	rgb(224, 99,100)	1.9935	2,2
Sp110	Gbp6	0.99189	50.12	0.62	rgb(224, 99,100)	1.9935	2,2
Sp2	Cdc25b	0.99189	50.12	0.621	rgb(224, 98,100)	1.9935	None
Sp2	Gm12942	-0.99189	50.12	-0.62	rgb( 81,135,241)	1.9935	None
Sp4	Klrd1	0.99189	50.12	0.618	rgb(224, 99,100)	1.9935	None
Sp6	Lrrc66	-0.99189	50.12	-0.62	rgb( 82,135,241)	1.9935	2,2
Srebf2	Cyp51	0.99189	50.12	0.62	rgb(224, 99,100)	1.9935	None
Zfp263	Pter	-0.99189	50.12	-0.62	rgb( 83,136,240)	1.9935	None
Zfp277	Vamp4	0.99189	50.12	0.616	rgb(224, 99,101)	1.9935	2,2
Batf	Ermn	0.99145	50.13	0.629	rgb(224, 97, 98)	1.9937	None
E2f1	Zc3hav1l	0.99145	50.13	0.634	rgb(224, 96, 97)	1.9937	None
Hif1a	Pdxp	0.99145	50.13	0.632	rgb(224, 96, 98)	1.9937	None
Hif1a	Sra1	0.99145	50.13	0.63	rgb(224, 97, 98)	1.9937	None
Ikzf3	Cxcr4	0.99145	50.13	0.628	rgb(224, 97, 98)	1.9937	None
Ikzf3	Qtrtd1	-0.99145	50.13	-0.63	rgb( 81,134,241)	1.9937	None
Irf4	Enpep	-0.99145	50.13	-0.63	rgb( 81,134,241)	1.9937	None
Irf4	Sfmbt1	0.99145	50.13	0.633	rgb(224, 96, 97)	1.9937	None
Lin54	Hist1h1b	0.99145	50.13	0.634	rgb(224, 96, 97)	1.9937	None
Nfe2l2	Dhcr24	0.99145	50.13	0.626	rgb(224, 97, 99)	1.9937	None
Pou2af1	Inpp4b	0.99145	50.13	0.629	rgb(224, 97, 98)	1.9937	None
Pparg	Erap1	0.99145	50.13	0.629	rgb(224, 97, 98)	1.9937	None
Rorc	Aff3	-0.99145	50.13	-0.63	rgb( 80,133,241)	1.9937	None
Satb1	Gja1	0.99145	50.13	0.63	rgb(224, 97, 98)	1.9937	None
Smad3	Acsbg1	0.99145	50.13	0.626	rgb(224, 97, 99)	1.9937	None
Sp4	Ept1	0.99145	50.13	0.627	rgb(224, 97, 99)	1.9937	None
Sp4	Mapkbp1	0.99145	50.13	0.631	rgb(224, 96, 98)	1.9937	None
Sp4	Tgfbr3	-0.99145	50.13	-0.63	rgb( 81,134,241)	1.9937	None
Stat3	Arid5a	0.99145	50.13	0.626	rgb(224, 97, 99)	1.9937	None
Stat3	Cdh23	0.99145	50.13	0.633	rgb(224, 96, 97)	1.9937	None
Stat3	Eci2	0.99145	50.13	0.626	rgb(224, 97, 99)	1.9937	None
Stat3	Psme1	-0.99145	50.13	-0.63	rgb( 79,133,241)	1.9937	None
Stat3	Rorc	0.99145	50.13	0.629	rgb(224, 97, 98)	1.9937	None
Stat3	Tubb6	0.99145	50.13	0.626	rgb(224, 97, 99)	1.9937	None
Bcl11b	Mllt6	0.99085	50.11	0.605	rgb(224,101,103)	1.9933	None
Bhlhe40	Tg	0.99085	50.11	0.606	rgb(224,101,103)	1.9933	None
Cebpg	Chac1	0.99085	50.11	0.605	rgb(224,101,103)	1.9933	2,2
Egr4	Fam20c	0.99085	50.11	0.614	rgb(224,100,101)	1.9933	None
Elf1	Zcchc3	-0.99085	50.11	-0.61	rgb( 84,136,240)	1.9933	None
Foxf2	Nhs	0.99085	50.11	0.612	rgb(224,100,101)	1.9933	2,2
Foxo3	Zcchc2	0.99085	50.11	0.613	rgb(224,100,101)	1.9933	None
Foxo3	Zfpm1	0.99085	50.11	0.607	rgb(224,101,102)	1.9933	None
Irf4	Loxl2	-0.99085	50.11	-0.61	rgb( 84,136,240)	1.9933	2,2
Irf8	Satb1	-0.99085	50.11	-0.61	rgb( 85,137,240)	1.9933	None
Mxd3	Smtn	0.99085	50.11	0.614	rgb(224,100,101)	1.9933	2,2
Mxi1	Cxcr4	0.99085	50.11	0.605	rgb(224,101,103)	1.9933	None
Mxi1	Urb1	-0.99085	50.11	-0.61	rgb( 84,136,240)	1.9933	None
Mybl1	Gtse1	0.99085	50.11	0.608	rgb(224,101,102)	1.9933	2,2
Myc	Tmem43	-0.99085	50.11	-0.61	rgb( 84,136,240)	1.9933	None
Nfil3	Htr1b	0.99085	50.11	0.605	rgb(224,101,103)	1.9933	None
Nfil3	Slc23a2	-0.99085	50.11	-0.61	rgb( 85,137,240)	1.9933	None
Nr4a2	Phlpp1	0.99085	50.11	0.607	rgb(224,101,102)	1.9933	None
Rorc	St3gal5	-0.99085	50.11	-0.61	rgb( 84,136,240)	1.9933	None
Rxra	Ypel3	-0.99085	50.11	-0.61	rgb( 84,136,240)	1.9933	None
Sox5	Zfp280b	-0.99085	50.11	-0.61	rgb( 85,137,240)	1.9933	None
Sp2	Slc39a9	0.99085	50.11	0.613	rgb(224,100,101)	1.9933	None
Sp4	Tyms	-0.99085	50.11	-0.61	rgb( 85,137,240)	1.9933	None
Srebf1	Tnk2	0.99085	50.11	0.609	rgb(224,101,102)	1.9933	None
Stat4	Wipf1	0.99085	50.11	0.609	rgb(224,101,102)	1.9933	None
Tigd2	Utf1	-0.99085	50.11	-0.61	rgb( 85,137,240)	1.9933	2,2
Zfp329	A230072C01Rik	0.99085	50.11	0.615	rgb(224,100,101)	1.9933	2,2
Zfp367	Rpa2	0.99085	50.11	0.609	rgb(224,101,102)	1.9933	2,2
Zfp473	Stat2	0.99085	50.11	0.61	rgb(224,100,102)	1.9933	2,2
Zfp524	Lime1	0.99085	50.11	0.607	rgb(224,101,102)	1.9933	2,2
Zfp536	Gykl1	0.99085	50.11	0.611	rgb(224,100,101)	1.9933	2,2
Zfp750	Gria3	0.99085	50.11	0.606	rgb(224,101,103)	1.9933	2,2
Atf6	Fundc2	0.99027	50.12	0.617	rgb(224, 99,100)	1.9935	None
Batf	Ikzf2	0.99027	50.12	0.618	rgb(224, 99,100)	1.9935	None
Bcl11b	Ift57	0.99027	50.12	0.617	rgb(224, 99,100)	1.9935	None
Casz1	Dusp8	0.99027	50.12	0.624	rgb(224, 98, 99)	1.9935	2,2
Egr2	Calhm2	-0.99027	50.12	-0.62	rgb( 83,135,241)	1.9935	None
Fosl2	Ddx51	-0.99027	50.12	-0.62	rgb( 82,135,241)	1.9935	None
Foxf2	Rtn4	0.99027	50.12	0.623	rgb(224, 98, 99)	1.9935	None
Gata3	D430041D05Rik	0.99027	50.12	0.615	rgb(224, 99,101)	1.9935	None
Hhex	Gpr161	0.99027	50.12	0.623	rgb(224, 98, 99)	1.9935	None
Hif1a	Itga7	0.99027	50.12	0.623	rgb(224, 98, 99)	1.9935	None
Hif1a	Piga	0.99027	50.12	0.623	rgb(224, 98, 99)	1.9935	None
Hif1a	Snapc1	0.99027	50.12	0.616	rgb(224, 99,101)	1.9935	None
Ikzf3	Ndrg2	0.99027	50.12	0.622	rgb(224, 98, 99)	1.9935	None
Irf4	Ankrd39	-0.99027	50.12	-0.62	rgb( 82,135,241)	1.9935	None
Irf4	Apobec1	-0.99027	50.12	-0.62	rgb( 82,135,241)	1.9935	None
Irf4	Atp1a1	-0.99027	50.12	-0.62	rgb( 82,135,241)	1.9935	None
Irf4	Cd44	-0.99027	50.12	-0.62	rgb( 82,135,241)	1.9935	None
Irf4	Cd5l	0.99027	50.12	0.619	rgb(224, 99,100)	1.9935	None
Irf4	Cxcl2	-0.99027	50.12	-0.62	rgb( 83,135,240)	1.9935	2,2
Irf4	Rai14	-0.99027	50.12	-0.62	rgb( 83,135,241)	1.9935	None
Irf4	Tnfsf4	-0.99027	50.12	-0.62	rgb( 82,135,241)	1.9935	None
Maf	Bspry	-0.99027	50.12	-0.62	rgb( 83,135,241)	1.9935	None
Maf	Casp3	-0.99027	50.12	-0.62	rgb( 84,136,240)	1.9935	None
Maf	Nrn1	-0.99027	50.12	-0.62	rgb( 82,135,241)	1.9935	None
Mxd1	Csrnp1	0.99027	50.12	0.62	rgb(224, 99,100)	1.9935	2,2
Rxra	Heyl	0.99027	50.12	0.623	rgb(224, 98, 99)	1.9935	None
Satb1	Bmpr1a	0.99027	50.12	0.62	rgb(224, 99,100)	1.9935	None
Sgsm2	Unc93b1	0.99027	50.12	0.616	rgb(224, 99,101)	1.9935	2,2
Sp2	Heatr1	-0.99027	50.12	-0.62	rgb( 83,135,240)	1.9935	None
Sp3	Ifi27l2a	0.99027	50.12	0.621	rgb(224, 98,100)	1.9935	None
Sp4	Adarb1	0.99027	50.12	0.617	rgb(224, 99,100)	1.9935	None
Ankzf1	Rbfox2	0.9897	50.1	0.601	rgb(224,102,103)	1.9931	2,2
Bhlhe40	Tnip3	0.9897	50.1	0.604	rgb(224,102,103)	1.9931	2,2
C030039L03Rik	Kcnc3	0.9897	50.1	0.599	rgb(224,102,104)	1.9931	2,2
Cebpg	Trib3	0.9897	50.1	0.598	rgb(224,103,104)	1.9931	2,2
E2f1	Tbc1d5	0.9897	50.1	0.602	rgb(224,102,103)	1.9931	None
Elf1	Cd226	0.9897	50.1	0.601	rgb(224,102,103)	1.9931	None
Elk3	Tmem19	0.9897	50.1	0.595	rgb(224,103,105)	1.9931	None
Fosl2	Tbc1d30	0.9897	50.1	0.604	rgb(224,102,103)	1.9931	None
Gabpa	Pxmp2	-0.9897	50.1	-0.6	rgb( 86,137,240)	1.9931	None
Gata3	Il13	0.9897	50.1	0.598	rgb(224,103,104)	1.9931	2,2
Hbp1	Ifnar1	0.9897	50.1	0.599	rgb(224,103,104)	1.9931	None
Ikzf2	Cd160	0.9897	50.1	0.596	rgb(224,103,104)	1.9931	2,2
Klf2	Fundc2	0.9897	50.1	0.596	rgb(224,103,104)	1.9931	None
Mxi1	P4ha2	0.9897	50.1	0.603	rgb(224,102,103)	1.9931	None
Mybl1	4632434I11Rik	0.9897	50.1	0.6	rgb(224,102,104)	1.9931	2,2
Nfkb1	Emb	-0.9897	50.1	-0.6	rgb( 87,138,240)	1.9931	None
Prdm1	Rnf170	-0.9897	50.1	-0.6	rgb( 87,138,240)	1.9931	None
Rreb1	Sh2b2	0.9897	50.1	0.6	rgb(224,102,104)	1.9931	None
Sp4	Dclre1a	-0.9897	50.1	-0.6	rgb( 86,137,240)	1.9931	None
Srebf1	Aacs	0.9897	50.1	0.6	rgb(224,102,104)	1.9931	2,2
Srebf1	Abcg1	0.9897	50.1	0.602	rgb(224,102,103)	1.9931	2,2
Stat1	Dtx3l	0.9897	50.1	0.598	rgb(224,103,104)	1.9931	None
Tcf12	Ncoa2	0.9897	50.1	0.602	rgb(224,102,103)	1.9931	None
Tcf4	Fads2	0.9897	50.1	0.598	rgb(224,103,104)	1.9931	2,2
Vax2	2310007L24Rik	0.9897	50.1	0.596	rgb(224,103,104)	1.9931	2,2
Vax2	Myo1f	0.9897	50.1	0.597	rgb(224,103,104)	1.9931	2,2
Zbtb33	Lyrm1	-0.9897	50.1	-0.6	rgb( 87,138,240)	1.9931	None
Zfp202	Fam89a	0.9897	50.1	0.601	rgb(224,102,103)	1.9931	None
Zfp263	Arhgef6	-0.9897	50.1	-0.6	rgb( 86,137,240)	1.9931	None
Zfp429	Zfp874a	0.9897	50.11	0.611	rgb(224,100,101)	1.9933	2,2
Zfp513	Vdac1	-0.9897	50.1	-0.6	rgb( 86,138,240)	1.9931	2,2
Atf6	Trim46	-0.98899	50.11	-0.61	rgb( 84,136,240)	1.9933	None
Batf	Cd274	-0.98899	50.11	-0.61	rgb( 84,136,240)	1.9933	None
Batf	Hmcn1	-0.98899	50.11	-0.61	rgb( 86,137,240)	1.9933	None
Batf	S100a6	0.98899	50.11	0.612	rgb(224,100,101)	1.9933	None
Creb3l2	Tacc2	0.98899	50.11	0.608	rgb(224,101,102)	1.9933	None
Dpf1	Gipr	0.98899	50.11	0.606	rgb(224,101,103)	1.9933	2,2
Egr2	Cd80	-0.98899	50.11	-0.61	rgb( 85,137,240)	1.9933	None
Egr3	Ralb	-0.98899	50.11	-0.61	rgb( 85,137,240)	1.9933	None
Fosl2	Fam114a1	0.98899	50.11	0.612	rgb(224,100,101)	1.9933	None
Foxh1	Ahnak	0.98899	50.11	0.608	rgb(224,101,102)	1.9933	None
Gabpa	Tprkb	0.98899	50.11	0.606	rgb(224,101,102)	1.9933	None
Hif1a	Egln3	0.98899	50.11	0.61	rgb(224,101,102)	1.9933	None
Hif1a	Plcxd1	0.98899	50.11	0.613	rgb(224,100,101)	1.9933	None
Irf4	Phldb2	-0.98899	50.11	-0.61	rgb( 85,137,240)	1.9933	None
Irf4	Pigr	-0.98899	50.11	-0.61	rgb( 85,137,240)	1.9933	None
Irf4	Slfn2	0.98899	50.11	0.612	rgb(224,100,101)	1.9933	None
Maf	Asnsd1	-0.98899	50.11	-0.61	rgb( 85,137,240)	1.9933	None
Maf	Sgk1	0.98899	50.11	0.608	rgb(224,101,102)	1.9933	None
Plagl1	Slc29a3	0.98899	50.11	0.613	rgb(224,100,101)	1.9933	None
Rorc	Foxb1	-0.98899	50.11	-0.61	rgb( 84,136,240)	1.9933	None
Rxra	Pkhd1	0.98899	50.11	0.607	rgb(224,101,102)	1.9933	None
Satb1	9430020K01Rik	0.98899	50.11	0.61	rgb(224,101,102)	1.9933	None
Satb1	Stc2	0.98899	50.11	0.613	rgb(224,100,101)	1.9933	None
Satb1	Syn1	-0.98899	50.11	-0.61	rgb( 84,136,240)	1.9933	None
Smad3	Ccr8	0.98899	50.11	0.612	rgb(224,100,101)	1.9933	None
Smad3	Nt5e	0.98899	50.11	0.615	rgb(224,100,101)	1.9933	None
Sp3	Zfp473	0.98899	50.11	0.61	rgb(224,100,102)	1.9933	None
Sp4	Akap12	-0.98899	50.11	-0.61	rgb( 85,137,240)	1.9933	None
Sp4	Plxna1	0.98899	50.11	0.612	rgb(224,100,101)	1.9933	None
Stat3	5430427O19Rik	-0.98899	50.11	-0.61	rgb( 85,137,240)	1.9933	None
Stat3	A230072C01Rik	0.98899	50.11	0.607	rgb(224,101,102)	1.9933	None
Stat3	Ctla2b	0.98899	50.11	0.611	rgb(224,100,102)	1.9933	None
Stat3	Skap2	0.98899	50.11	0.611	rgb(224,100,102)	1.9933	None
Stat3	Socs3	0.98899	50.11	0.615	rgb(224,100,101)	1.9933	None
Tet2	Dip2b	0.98899	50.11	0.615	rgb(224,100,101)	1.9933	2,2
Zbtb46	Serpinb6b	0.98899	50.11	0.608	rgb(224,101,102)	1.9933	2,2
Zfp692	Myo1a	0.98899	50.11	0.61	rgb(224,100,102)	1.9933	2,2
Zscan22	A730017L22Rik	0.98899	50.11	0.613	rgb(224,100,101)	1.9933	2,2
Arid3b	Ccdc107	-0.98826	50.09	-0.59	rgb( 90,140,239)	1.9929	None
Arid3b	Tmed3	-0.98826	50.09	-0.59	rgb( 88,139,240)	1.9929	None
Atf3	Batf3	0.98826	50.09	0.592	rgb(224,104,105)	1.9929	None
Batf	Ccdc50	-0.98826	50.09	-0.59	rgb( 88,139,240)	1.9929	None
Elf1	Srpk2	0.98826	50.09	0.586	rgb(223,105,106)	1.9929	None
Elk3	Capg	0.98826	50.09	0.587	rgb(223,105,106)	1.9929	2,2
Etv6	Gripap1	-0.98826	50.09	-0.59	rgb( 88,139,240)	1.9929	None
Etv6	Skap2	0.98826	50.09	0.587	rgb(223,105,106)	1.9929	None
Fosl1	Retsat	-0.98826	50.09	-0.59	rgb( 90,140,239)	1.9929	None
Fosl2	Arid5a	0.98826	50.09	0.593	rgb(224,104,105)	1.9929	None
Foxf2	Gja1	0.98826	50.09	0.587	rgb(223,105,106)	1.9929	2,2
Gata3	Smpdl3b	0.98826	50.09	0.589	rgb(223,105,106)	1.9929	None
Irf1	Insrr	0.98826	50.09	0.588	rgb(223,105,106)	1.9929	2,2
Irf4	Crtam	-0.98826	50.09	-0.59	rgb( 89,139,239)	1.9929	None
Irf4	Dzip1	-0.98826	50.09	-0.59	rgb( 88,139,240)	1.9929	None
Irf4	Ptk2	-0.98826	50.09	-0.59	rgb( 89,139,239)	1.9929	None
Irf4	Srgap3	-0.98826	50.09	-0.59	rgb( 88,138,240)	1.9929	None
Irf8	Cxcr5	0.98826	50.09	0.586	rgb(223,105,106)	1.9929	None
Jdp2	Pck2	0.98826	50.09	0.593	rgb(224,104,105)	1.9929	2,2
Mbnl2	Pak1	0.98826	50.09	0.588	rgb(223,105,106)	1.9929	2,2
Msc	Hvcn1	0.98826	50.09	0.589	rgb(223,105,106)	1.9929	2,2
Nfat5	Actn1	0.98826	50.09	0.594	rgb(224,103,105)	1.9929	None
Nr4a1	Adarb1	-0.98826	50.09	-0.59	rgb( 89,139,239)	1.9929	None
Plagl1	Slc3a2	0.98826	50.09	0.585	rgb(223,105,106)	1.9929	None
Prrx1	Fat1	0.98826	50.09	0.591	rgb(224,104,105)	1.9929	2,2
Rlf	Dctpp1	-0.98826	50.09	-0.59	rgb( 89,139,239)	1.9929	2,2
Rxra	Ddx19b	0.98826	50.09	0.587	rgb(223,105,106)	1.9929	None
Rxra	Trpm6	0.98826	50.09	0.595	rgb(224,103,105)	1.9929	None
Setdb2	Pde4a	-0.98826	50.09	-0.59	rgb( 88,139,240)	1.9929	2,2
Sp2	Hist3h2bb-ps	-0.98826	50.09	-0.59	rgb( 90,140,239)	1.9929	None
Spib	Pik3r3	0.98826	50.09	0.593	rgb(224,104,105)	1.9929	None
Tcf12	H2-Ab1	-0.98826	50.09	-0.59	rgb( 88,139,240)	1.9929	None
Tead1	Fut7	0.98826	50.09	0.588	rgb(223,105,106)	1.9929	2,2
Thap1	Dffb	0.98826	50.09	0.591	rgb(223,104,105)	1.9929	None
Thap3	Cox7a2l	0.98826	50.09	0.592	rgb(224,104,105)	1.9929	2,2
Vax2	Il23r	0.98826	50.09	0.586	rgb(223,105,106)	1.9929	None
Zbtb32	Pstpip1	0.98826	50.09	0.588	rgb(223,105,106)	1.9929	2,2
Zbtb4	Arrb1	0.98826	50.09	0.592	rgb(224,104,105)	1.9929	None
Zfp280d	Acp5	-0.98826	50.09	-0.59	rgb( 89,139,239)	1.9929	2,2
Ascl2	Ahrr	0.9875	50.1	0.596	rgb(224,103,104)	1.9931	None
Atf6	Exosc8	0.9875	50.1	0.598	rgb(224,103,104)	1.9931	None
Batf	Cdh17	0.9875	50.1	0.601	rgb(224,102,103)	1.9931	None
Batf	Igfbp7	-0.9875	50.1	-0.6	rgb( 88,138,240)	1.9931	None
Batf	Prss30	0.9875	50.1	0.601	rgb(224,102,103)	1.9931	None
Batf	Sema4f	0.9875	50.1	0.603	rgb(224,102,103)	1.9931	None
Bcl11b	Sars	0.9875	50.1	0.6	rgb(224,102,104)	1.9931	None
C030039L03Rik	Atp7b	0.9875	50.1	0.601	rgb(224,102,103)	1.9931	2,2
Cebpg	Wwc1	-0.9875	50.1	-0.6	rgb( 86,137,240)	1.9931	None
E2f4	Cdc25b	0.9875	50.1	0.602	rgb(224,102,103)	1.9931	None
Fosl1	Dpy19l3	0.9875	50.1	0.601	rgb(224,102,103)	1.9931	None
Fosl2	Eaf2	0.9875	50.1	0.602	rgb(224,102,103)	1.9931	None
Fosl2	Zcchc24	0.9875	50.1	0.596	rgb(224,103,104)	1.9931	None
Foxq1	Rassf3	0.9875	50.1	0.596	rgb(224,103,104)	1.9931	None
Glis2	Cacna1c	0.9875	50.1	0.603	rgb(224,102,103)	1.9931	None
Hif1a	Cisd3	0.9875	50.1	0.602	rgb(224,102,103)	1.9931	None
Hif1a	Rab33a	0.9875	50.1	0.598	rgb(224,103,104)	1.9931	None
Hlf	Pde7a	0.9875	50.1	0.597	rgb(224,103,104)	1.9931	None
Ikzf3	Adck1	-0.9875	50.1	-0.6	rgb( 86,137,240)	1.9931	None
Irf4	Icosl	-0.9875	50.1	-0.6	rgb( 87,138,240)	1.9931	None
Irf4	Rufy3	-0.9875	50.1	-0.6	rgb( 87,138,240)	1.9931	None
Jdp2	Srgn	-0.9875	50.1	-0.6	rgb( 87,138,240)	1.9931	None
Jund	Rims2	0.9875	50.1	0.601	rgb(224,102,103)	1.9931	None
Maf	Dst	0.9875	50.1	0.605	rgb(224,102,103)	1.9931	None
Maf	Snx9	-0.9875	50.1	-0.6	rgb( 86,137,240)	1.9931	None
Plag1	Hmgn1	-0.9875	50.1	-0.6	rgb( 87,138,240)	1.9931	None
Ppard	Smad3	0.9875	50.1	0.596	rgb(224,103,104)	1.9931	None
Prrx1	Serpinb5	-0.9875	50.1	-0.6	rgb( 86,137,240)	1.9931	2,2
Rorc	Tnf	0.9875	50.1	0.597	rgb(224,103,104)	1.9931	None
Six1	Capn5	0.9875	50.1	0.604	rgb(224,102,103)	1.9931	None
Six1	Col15a1	0.9875	50.1	0.597	rgb(224,103,104)	1.9931	None
Six5	Rai14	-0.9875	50.1	-0.6	rgb( 87,138,240)	1.9931	2,2
Smad3	Dst	0.9875	50.1	0.6	rgb(224,102,104)	1.9931	None
Sp4	Tex2	-0.9875	50.1	-0.6	rgb( 88,138,240)	1.9931	None
Stat1	Parp9	0.9875	50.1	0.597	rgb(224,103,104)	1.9931	None
Stat3	Cyth4	0.9875	50.1	0.599	rgb(224,103,104)	1.9931	None
Stat3	Trim46	0.9875	50.1	0.602	rgb(224,102,103)	1.9931	None
Stat4	Upb1	-0.9875	50.1	-0.6	rgb( 86,137,240)	1.9931	None
Trp53	Sh3gl3	0.9875	50.1	0.596	rgb(224,103,104)	1.9931	None
Zfp318	Enpp4	-0.9875	50.1	-0.6	rgb( 87,138,240)	1.9931	2,2
Zfp536	Itsn1	0.9875	50.1	0.598	rgb(224,103,104)	1.9931	2,2
Adnp	Dcxr	-0.98645	50.08	-0.58	rgb( 90,140,239)	1.9927	2,2
Arid3a	Ahnak	0.98645	50.08	0.583	rgb(223,106,107)	1.9927	None
Arid3a	Erc1	0.98645	50.08	0.579	rgb(223,106,108)	1.9927	None
Atf3	Hdc	0.98645	50.08	0.578	rgb(223,107,108)	1.9927	None
Atf6	Lamc1	0.98645	50.08	0.583	rgb(223,106,107)	1.9927	None
Batf	Ptger4	0.98645	50.08	0.575	rgb(223,107,108)	1.9927	None
Bcl11b	2210013O21Rik	-0.98645	50.08	-0.58	rgb( 92,141,239)	1.9927	None
Bcl6	2018-03-03	0.98645	50.08	0.583	rgb(223,106,107)	1.9927	None
Bhlhe40	Anxa4	0.98645	50.08	0.578	rgb(223,107,108)	1.9927	None
Bhlhe40	Bmpr1a	0.98645	50.08	0.578	rgb(223,107,108)	1.9927	None
Bhlhe40	Ndrg1	0.98645	50.08	0.578	rgb(223,107,108)	1.9927	2,2
Cxxc5	Il1a	-0.98645	50.08	-0.58	rgb( 91,140,239)	1.9927	2,2
Dpf1	Porcn	0.98645	50.08	0.581	rgb(223,106,107)	1.9927	2,2
Drap1	Anapc1	-0.98645	50.08	-0.58	rgb( 91,140,239)	1.9927	2,2
Dzip1	Uggt2	0.98645	50.08	0.581	rgb(223,106,107)	1.9927	2,2
Epas1	Gsn	0.98645	50.08	0.583	rgb(223,106,107)	1.9927	2,2
Fosl2	L3mbtl3	-0.98645	50.08	-0.58	rgb( 92,141,239)	1.9927	None
Foxf2	Myo3b	0.98645	50.08	0.576	rgb(223,107,108)	1.9927	None
Foxn2	Rpusd2	0.98645	50.08	0.576	rgb(223,107,108)	1.9927	None
Foxo3	Sun1	0.98645	50.08	0.582	rgb(223,106,107)	1.9927	None
Hic1	Gfi1	0.98645	50.08	0.578	rgb(223,107,108)	1.9927	None
Hic1	Ggta1	0.98645	50.08	0.58	rgb(223,106,107)	1.9927	None
Hif1a	Satb1	0.98645	50.08	0.583	rgb(223,106,107)	1.9927	None
Klf13	Emp3	0.98645	50.08	0.578	rgb(223,107,108)	1.9927	None
Klf2	Pik3ip1	0.98645	50.08	0.576	rgb(223,107,108)	1.9927	None
Maf	Cdh23	0.98645	50.08	0.575	rgb(223,107,108)	1.9927	None
Mxi1	Ptp4a3	-0.98645	50.08	-0.58	rgb( 91,140,239)	1.9927	None
Rarg	Cox17	0.98645	50.08	0.577	rgb(223,107,108)	1.9927	None
Rest	Rnf169	0.98645	50.08	0.58	rgb(223,106,107)	1.9927	None
Runx2	Runx1	0.98645	50.08	0.581	rgb(223,106,107)	1.9927	None
Rxra	Cdc14a	0.98645	50.08	0.584	rgb(223,105,107)	1.9927	None
Sox5	Serpinf1	0.98645	50.08	0.584	rgb(223,106,107)	1.9927	2,2
Sp4	Cnnm3	-0.98645	50.08	-0.58	rgb( 91,140,239)	1.9927	None
Sp4	Kbtbd11	0.98645	50.08	0.577	rgb(223,107,108)	1.9927	None
Sp4	Syde1	0.98645	50.08	0.581	rgb(223,106,107)	1.9927	None
Srebf1	Mapk11	0.98645	50.08	0.583	rgb(223,106,107)	1.9927	None
Stat1	Slain1	0.98645	50.08	0.579	rgb(223,106,108)	1.9927	None
Stat2	Pml	0.98645	50.08	0.583	rgb(223,106,107)	1.9927	None
Stat4	Nudt6	-0.98645	50.08	-0.58	rgb( 92,141,239)	1.9927	None
Tet2	Gprin3	0.98645	50.08	0.584	rgb(223,105,107)	1.9927	2,2
Yy2	Acin1	0.98645	50.08	0.582	rgb(223,106,107)	1.9927	None
Yy2	Fancm	0.98645	50.08	0.577	rgb(223,107,108)	1.9927	None
Zbtb33	Phf6	0.98645	50.08	0.576	rgb(223,107,108)	1.9927	None
Zbtb6	Cstf2t	0.98645	50.08	0.584	rgb(223,105,107)	1.9927	2,2
Zfp263	Dlg3	-0.98645	50.08	-0.58	rgb( 92,141,239)	1.9927	None
Zfp263	Rtn4	-0.98645	50.08	-0.58	rgb( 92,141,239)	1.9927	None
Zfp329	Neat1	0.98645	50.08	0.578	rgb(223,107,108)	1.9927	2,2
Zfp35	Mmachc	0.98645	50.08	0.582	rgb(223,106,107)	1.9927	2,2
Zfp369	Tmem181b-ps	0.98645	50.08	0.581	rgb(223,106,107)	1.9927	None
Zfp386	Spry1	-0.98645	50.08	-0.58	rgb( 90,140,239)	1.9927	2,2
Zfp429	H60b	-0.98645	50.08	-0.58	rgb( 91,140,239)	1.9927	2,2
Zfp429	H60c	-0.98645	50.08	-0.58	rgb( 91,140,239)	1.9927	2,2
Zfp429	Trim12a	0.98645	50.08	0.584	rgb(223,105,107)	1.9927	2,2
Zfp750	Exoc4	0.98645	50.08	0.581	rgb(223,106,107)	1.9927	2,2
Zfp874a	Rin2	0.98645	50.08	0.582	rgb(223,106,107)	1.9927	2,2
Zfp960	F2rl1	-0.98645	50.08	-0.58	rgb( 91,141,239)	1.9927	2,2
Ar	Ddx11	-0.98573	50.09	-0.59	rgb( 89,139,239)	1.9929	None
Atf6	Pts	0.98573	50.09	0.586	rgb(223,105,106)	1.9929	None
Batf	Dcp2	-0.98573	50.09	-0.59	rgb( 90,140,239)	1.9929	None
Batf	H2-Q10	0.98573	50.09	0.588	rgb(223,105,106)	1.9929	None
Cebpb	Tacr2	0.98573	50.09	0.594	rgb(224,104,105)	1.9929	2,2
Creb1	Lgals7	0.98573	50.09	0.586	rgb(223,105,106)	1.9929	None
Elk3	Gpr97	0.98573	50.09	0.594	rgb(224,104,105)	1.9929	2,2
Fos	Rbm15	0.98573	50.09	0.592	rgb(224,104,105)	1.9929	None
Fosl2	H2-Q10	0.98573	50.09	0.59	rgb(223,104,106)	1.9929	None
Gm14420	Cdkn2d	0.98573	50.09	0.589	rgb(223,105,106)	1.9929	2,2
Hey1	Son	0.98573	50.09	0.587	rgb(223,105,106)	1.9929	None
Hif1a	Fam114a2	0.98573	50.09	0.587	rgb(223,105,106)	1.9929	None
Hif1a	Rnf113a1	0.98573	50.09	0.594	rgb(224,104,105)	1.9929	None
Hif1a	Vdac1	0.98573	50.09	0.587	rgb(223,105,106)	1.9929	None
Hif1a	Xpnpep1	0.98573	50.09	0.592	rgb(224,104,105)	1.9929	None
Ikzf2	Gfod1	0.98573	50.09	0.594	rgb(224,103,105)	1.9929	None
Irf2	Abhd2	0.98573	50.09	0.59	rgb(223,104,106)	1.9929	None
Irf4	C2cd4b	-0.98573	50.09	-0.59	rgb( 88,139,240)	1.9929	None
Irf4	Pld2	0.98573	50.09	0.587	rgb(223,105,106)	1.9929	None
Irf9	Ifit3	0.98573	50.09	0.588	rgb(223,105,106)	1.9929	2,2
Irf9	Pyhin1	0.98573	50.09	0.589	rgb(223,104,106)	1.9929	None
Irf9	Xaf1	0.98573	50.09	0.59	rgb(223,104,106)	1.9929	None
Klf4	Hps6	0.98573	50.09	0.589	rgb(223,105,106)	1.9929	None
Maf	Ap1s3	-0.98573	50.09	-0.59	rgb( 89,139,239)	1.9929	None
Nr4a1	Mab21l2	-0.98573	50.09	-0.59	rgb( 89,139,239)	1.9929	2,2
Pou2af1	Slc4a11	-0.98573	50.09	-0.59	rgb( 89,139,239)	1.9929	None
Rest	Mbtd1	-0.98573	50.09	-0.59	rgb( 89,139,239)	1.9929	None
Rfx1	Gripap1	-0.98573	50.09	-0.59	rgb( 88,139,240)	1.9929	None
Satb1	Arhgdig	0.98573	50.09	0.587	rgb(223,105,106)	1.9929	None
Satb1	Dab2ip	0.98573	50.09	0.593	rgb(224,104,105)	1.9929	None
Satb1	Rapgef5	0.98573	50.09	0.586	rgb(223,105,106)	1.9929	2,2
Six5	Rdh10	-0.98573	50.09	-0.59	rgb( 88,139,240)	1.9929	None
Sp4	Rcsd1	-0.98573	50.09	-0.59	rgb( 88,139,240)	1.9929	None
Sp4	S100a13	-0.98573	50.09	-0.59	rgb( 88,139,240)	1.9929	None
Stat3	Acox3	0.98573	50.09	0.592	rgb(224,104,105)	1.9929	None
Trp53	Zfp365	0.98573	50.09	0.589	rgb(223,104,106)	1.9929	None
Zbtb7a	Nid2	0.98573	50.09	0.594	rgb(224,104,105)	1.9929	None
Zfp385a	Psrc1	0.98573	50.09	0.585	rgb(223,105,106)	1.9929	2,2
Zfp414	Ucp2	0.98573	50.09	0.592	rgb(224,104,105)	1.9929	2,2
Batf	Cd80	-0.98485	50.08	-0.58	rgb( 92,141,239)	1.9927	None
Batf	Hvcn1	0.98485	50.08	0.58	rgb(223,106,107)	1.9927	None
Batf	Rabgap1l	0.98485	50.08	0.577	rgb(223,107,108)	1.9927	None
C030039L03Rik	1700001L05Rik	0.98485	50.08	0.583	rgb(223,106,107)	1.9927	2,2
C030039L03Rik	Kbtbd13	0.98485	50.08	0.575	rgb(223,107,108)	1.9927	2,2
Cxxc5	Nod1	0.98485	50.08	0.575	rgb(223,107,108)	1.9927	2,2
Ebf1	Dhrs3	0.98485	50.08	0.577	rgb(223,107,108)	1.9927	None
Esrra	Prr5l	0.98485	50.08	0.581	rgb(223,106,107)	1.9927	None
Etv6	Zfp445	0.98485	50.08	0.577	rgb(223,107,108)	1.9927	None
Fos	Tmbim1	0.98485	50.08	0.577	rgb(223,107,108)	1.9927	None
Fosl2	Ubtd1	0.98485	50.08	0.584	rgb(223,106,107)	1.9927	None
Gata1	Il17a	0.98485	50.08	0.584	rgb(223,105,107)	1.9927	None
Gfi1	D130040H23Rik	0.98485	50.08	0.58	rgb(223,106,107)	1.9927	None
Glis2	Ethe1	-0.98485	50.08	-0.58	rgb( 91,140,239)	1.9927	2,2
Gm14420	Gm2011	0.98485	50.08	0.575	rgb(223,107,108)	1.9927	2,2
Hif1a	Nags	0.98485	50.08	0.579	rgb(223,106,107)	1.9927	None
Hif1a	Unc13a	0.98485	50.08	0.58	rgb(223,106,107)	1.9927	None
Ikzf3	Gpr146	0.98485	50.08	0.576	rgb(223,107,108)	1.9927	None
Irf4	Acot6	-0.98485	50.08	-0.58	rgb( 92,141,239)	1.9927	None
Irf4	Etv6	0.98485	50.08	0.58	rgb(223,106,107)	1.9927	None
Irf4	Rhebl1	0.98485	50.08	0.575	rgb(223,107,108)	1.9927	None
Lef1	Nlrc3	0.98485	50.08	0.583	rgb(223,106,107)	1.9927	None
Lin54	Hist1h1c	0.98485	50.08	0.58	rgb(223,106,107)	1.9927	None
Lin54	Wrnip1	0.98485	50.08	0.582	rgb(223,106,107)	1.9927	None
Maf	Nedd9	-0.98485	50.08	-0.58	rgb( 92,141,239)	1.9927	None
Maf	Peli2	0.98485	50.08	0.581	rgb(223,106,107)	1.9927	None
Maf	Pgrmc1	-0.98485	50.08	-0.58	rgb( 91,141,239)	1.9927	None
Maf	Tnfsf11	-0.98485	50.08	-0.58	rgb( 92,141,239)	1.9927	None
Nfkb2	Ly6c2	-0.98485	50.08	-0.58	rgb( 90,140,239)	1.9927	2,2
Nr1d2	Il17f	0.98485	50.08	0.583	rgb(223,106,107)	1.9927	None
Pou2f2	Smpd4	-0.98485	50.08	-0.58	rgb( 91,141,239)	1.9927	None
Prdm16	Endod1	0.98485	50.08	0.585	rgb(223,105,107)	1.9927	None
Rxra	Fcgbp	0.98485	50.08	0.582	rgb(223,106,107)	1.9927	2,2
Smad3	Slc9a2	0.98485	50.08	0.582	rgb(223,106,107)	1.9927	None
Sp2	Casp3	0.98485	50.08	0.575	rgb(223,107,108)	1.9927	None
Sp4	Ccng2	-0.98485	50.08	-0.58	rgb( 90,140,239)	1.9927	None
Sp4	Emp3	-0.98485	50.08	-0.58	rgb( 90,140,239)	1.9927	None
Sp4	Itgb7	-0.98485	50.08	-0.58	rgb( 90,140,239)	1.9927	None
Sp4	Lgals1	-0.98485	50.08	-0.58	rgb( 90,140,239)	1.9927	None
Sp4	Sytl1	-0.98485	50.08	-0.58	rgb( 91,140,239)	1.9927	None
Stat1	Gimap8	0.98485	50.08	0.58	rgb(223,106,107)	1.9927	None
Stat3	Maf	0.98485	50.08	0.583	rgb(223,106,107)	1.9927	None
Stat3	Picalm	0.98485	50.08	0.576	rgb(223,107,108)	1.9927	None
Zfp169	Inpp4a	0.98485	50.08	0.578	rgb(223,107,108)	1.9927	2,2
Zfp385a	Zfp750	0.98485	50.08	0.579	rgb(223,106,107)	1.9927	2,2
Zfp407	Mdn1	0.98485	50.08	0.581	rgb(223,106,107)	1.9927	2,2
Zfp9	Ifitm1	0.98485	50.08	0.581	rgb(223,106,107)	1.9927	2,2
Bcl6	3110057O12Rik	-0.9837	50.07	-0.57	rgb( 94,142,239)	1.9925	2,2
Bcl6	Slc1a2	-0.9837	50.07	-0.57	rgb( 93,141,239)	1.9925	None
Bhlhe40	Acsl6	0.9837	50.07	0.57	rgb(223,108,109)	1.9925	None
Egr2	Ergic1	-0.9837	50.07	-0.57	rgb( 92,141,239)	1.9925	None
Egr2	Pde7a	0.9837	50.07	0.568	rgb(223,109,110)	1.9925	None
Elf1	Mafg	-0.9837	50.07	-0.57	rgb( 93,142,239)	1.9925	None
Elk3	Ubash3b	0.9837	50.07	0.566	rgb(223,109,110)	1.9925	None
Epas1	Cnnm1	0.9837	50.07	0.565	rgb(223,109,110)	1.9925	2,2
Ets1	Slc9a3r1	0.9837	50.07	0.566	rgb(223,109,110)	1.9925	None
Etv4	Mboat7	0.9837	50.07	0.571	rgb(223,108,109)	1.9925	2,2
Fosl2	Chd7	0.9837	50.07	0.567	rgb(223,109,110)	1.9925	None
Fosl2	Lgmn	0.9837	50.07	0.568	rgb(223,109,110)	1.9925	None
Fosl2	Zfp473	0.9837	50.07	0.566	rgb(223,109,110)	1.9925	None
Fosl2	Zswim4	0.9837	50.07	0.565	rgb(223,109,110)	1.9925	None
Gata1	Gadd45g	0.9837	50.07	0.57	rgb(223,108,109)	1.9925	None
Hlx	Olfm1	0.9837	50.07	0.575	rgb(223,107,108)	1.9925	2,2
Ikzf4	Lta	0.9837	50.07	0.57	rgb(223,108,109)	1.9925	None
Irf4	Nedd4	-0.9837	50.07	-0.57	rgb( 93,142,239)	1.9925	None
Irf4	Nox1	-0.9837	50.07	-0.57	rgb( 92,141,239)	1.9925	None
Irf4	Sh3bp1	-0.9837	50.07	-0.57	rgb( 93,142,239)	1.9925	None
Irf5	Calhm2	0.9837	50.07	0.568	rgb(223,109,110)	1.9925	2,2
Irf9	Mnda	0.9837	50.07	0.573	rgb(223,108,109)	1.9925	None
Jund	Csrnp1	0.9837	50.07	0.571	rgb(223,108,109)	1.9925	None
Klf7	Syt11	0.9837	50.07	0.567	rgb(223,109,110)	1.9925	None
Mxd3	Lgals1	0.9837	50.07	0.574	rgb(223,107,109)	1.9925	2,2
Myb	Tmem120b	0.9837	50.07	0.569	rgb(223,108,109)	1.9925	2,2
Ncoa3	Id3	-0.9837	50.07	-0.57	rgb( 94,142,239)	1.9925	2,2
Nfkb1	Nme4	-0.9837	50.07	-0.57	rgb( 94,142,239)	1.9925	None
Nfkb2	Tnni1	0.9837	50.07	0.57	rgb(223,108,109)	1.9925	None
Nr4a2	Synj1	0.9837	50.07	0.568	rgb(223,108,110)	1.9925	None
Patz1	Retsat	0.9837	50.07	0.567	rgb(223,109,110)	1.9925	None
Plagl1	Bid	0.9837	50.07	0.566	rgb(223,109,110)	1.9925	None
Rest	Zfp280b	-0.9837	50.07	-0.57	rgb( 93,142,239)	1.9925	None
Rxra	Egr3	0.9837	50.07	0.568	rgb(223,109,110)	1.9925	None
Sgsm2	Per3	0.9837	50.07	0.572	rgb(223,108,109)	1.9925	2,2
Sgsm2	Tert	0.9837	50.07	0.57	rgb(223,108,109)	1.9925	2,2
Smad3	Pim1	0.9837	50.07	0.573	rgb(223,108,109)	1.9925	None
Sp140	Ccdc122	0.9837	50.07	0.566	rgb(223,109,110)	1.9925	2,2
Sp2	Ncdn	0.9837	50.07	0.57	rgb(223,108,109)	1.9925	None
Sp3	Cnnm4	0.9837	50.07	0.575	rgb(223,107,108)	1.9925	None
Sp4	Boll	0.9837	50.07	0.572	rgb(223,108,109)	1.9925	None
Sp4	Ccdc134	-0.9837	50.07	-0.57	rgb( 93,142,239)	1.9925	None
Sp4	Golm1	-0.9837	50.07	-0.57	rgb( 93,141,239)	1.9925	None
Stat4	Cpd	-0.9837	50.07	-0.57	rgb( 93,142,239)	1.9925	None
Stat4	Fam129a	0.9837	50.07	0.572	rgb(223,108,109)	1.9925	None
Stat4	Lrp8	-0.9837	50.07	-0.57	rgb( 93,142,239)	1.9925	None
Stat4	Rilpl2	0.9837	50.07	0.568	rgb(223,109,110)	1.9925	None
Stat5b	Usp22	0.9837	50.07	0.571	rgb(223,108,109)	1.9925	2,2
Xbp1	Rpl36al	-0.9837	50.07	-0.57	rgb( 94,142,238)	1.9925	None
Zbtb7a	Acad8	-0.9837	50.07	-0.57	rgb( 92,141,239)	1.9925	None
Zbtb7b	Cd4	0.9837	50.07	0.571	rgb(223,108,109)	1.9925	None
Zfp169	Smg5	0.9837	50.07	0.657	rgb(224, 92, 93)	1.9925	2,2
Zfp263	Anln	-0.9837	50.07	-0.57	rgb( 93,141,239)	1.9925	None
Zfp263	Celf4	0.9837	50.07	0.569	rgb(223,108,109)	1.9925	None
Zfp263	E2f7	-0.9837	50.07	-0.57	rgb( 94,142,239)	1.9925	None
Zfp367	Tyms	0.9837	50.07	0.574	rgb(223,107,109)	1.9925	2,2
Zfp385a	Ppm1d	0.9837	50.07	0.565	rgb(223,109,110)	1.9925	2,2
Zfp429	Ankrd33b	0.9837	50.07	0.569	rgb(223,108,109)	1.9925	2,2
Zfp787	Zfp668	0.9837	50.07	0.569	rgb(223,108,109)	1.9925	2,2
Zfp960	Ifi204	0.9837	50.07	0.573	rgb(223,108,109)	1.9925	2,2
Zfx	Cox7a1	-0.9837	50.07	-0.57	rgb( 93,141,239)	1.9925	None
Zzz3	Tmem205	-0.9837	50.07	-0.57	rgb( 94,142,238)	1.9925	2,2
Ascl2	Serpine2	0.98263	50.07	0.572	rgb(223,108,109)	1.9925	None
Batf	Rilpl2	-0.98263	50.07	-0.57	rgb( 92,141,239)	1.9925	None
Batf	S100a4	0.98263	50.07	0.572	rgb(223,108,109)	1.9925	None
Bcl11b	Zcchc3	0.98263	50.07	0.57	rgb(223,108,109)	1.9925	None
Bhlhe41	Slc7a3	0.98263	50.07	0.574	rgb(223,107,108)	1.9925	2,2
Cebpb	Myd88	-0.98263	50.07	-0.57	rgb( 93,141,239)	1.9925	None
Creb5	Fosl2	0.98263	50.07	0.567	rgb(223,109,110)	1.9925	2,2
E2f4	Cenpw	0.98263	50.07	0.572	rgb(223,108,109)	1.9925	None
Erf	Lrmp	-0.98263	50.07	-0.57	rgb( 93,142,239)	1.9925	None
Etv6	Traf6	-0.98263	50.07	-0.57	rgb( 93,142,239)	1.9925	None
Fosl2	Serpinb5	0.98263	50.07	0.567	rgb(223,109,110)	1.9925	None
Fosl2	Tgfb3	0.98263	50.07	0.569	rgb(223,108,109)	1.9925	None
Hif1a	Atp7b	0.98263	50.07	0.574	rgb(223,107,108)	1.9925	None
Hif1a	Dnajc21	0.98263	50.07	0.573	rgb(223,107,109)	1.9925	None
Hif1a	Scrt1	0.98263	50.07	0.573	rgb(223,108,109)	1.9925	None
Ikzf3	Heatr1	-0.98263	50.07	-0.57	rgb( 93,142,239)	1.9925	None
Irf4	Adamts6	-0.98263	50.07	-0.57	rgb( 93,142,239)	1.9925	None
Irf4	Angptl4	-0.98263	50.07	-0.57	rgb( 94,142,239)	1.9925	None
Irf4	Gpr35	-0.98263	50.07	-0.57	rgb( 93,142,239)	1.9925	2,2
Irf4	Tnfsf8	-0.98263	50.07	-0.57	rgb( 93,142,239)	1.9925	None
Irf4	Zfp36l1	-0.98263	50.07	-0.57	rgb( 93,142,239)	1.9925	None
Irf8	Gbp8	0.98263	50.07	0.566	rgb(223,109,110)	1.9925	None
Maf	Slfn2	-0.98263	50.07	-0.57	rgb( 93,142,239)	1.9925	None
Msx2	Moap1	-0.98263	50.07	-0.57	rgb( 94,142,239)	1.9925	2,2
Mtf2	Dcaf17	0.98263	50.07	0.566	rgb(223,109,110)	1.9925	2,2
Mxi1	Tnfrsf21	0.98263	50.07	0.567	rgb(223,109,110)	1.9925	None
Nfkb2	Plekhh1	0.98263	50.07	0.567	rgb(223,109,110)	1.9925	2,2
Npas4	Sema4g	0.98263	50.07	0.573	rgb(223,108,109)	1.9925	2,2
Pou2af1	Ldlrap1	0.98263	50.07	0.571	rgb(223,108,109)	1.9925	None
Prdm1	Ly6a	0.98263	50.07	0.574	rgb(223,107,109)	1.9925	None
Rora	Adam12	0.98263	50.07	0.573	rgb(223,108,109)	1.9925	2,2
Rorc	Il17re	0.98263	50.07	0.566	rgb(223,109,110)	1.9925	None
Rorc	Mylk2	0.98263	50.07	0.566	rgb(223,109,110)	1.9925	None
Rxra	Acot5	0.98263	50.07	0.568	rgb(223,108,110)	1.9925	2,2
Rxra	Obscn	0.98263	50.07	0.571	rgb(223,108,109)	1.9925	2,2
Smad3	Casp3	-0.98263	50.07	-0.57	rgb( 94,142,239)	1.9925	2,2
Sp110	Aif1	-0.98263	50.07	-0.57	rgb( 93,141,239)	1.9925	2,2
Sp4	Coro7	-0.98263	50.07	-0.57	rgb( 94,142,239)	1.9925	None
Sp4	Nlrc3	-0.98263	50.07	-0.57	rgb( 93,142,239)	1.9925	2,2
Sp4	Sesn1	-0.98263	50.07	-0.57	rgb( 94,142,239)	1.9925	None
Stat1	Eaf2	0.98263	50.07	0.575	rgb(223,107,108)	1.9925	None
Stat3	BC021614	0.98263	50.07	0.574	rgb(223,107,108)	1.9925	None
Stat3	Inhba	0.98263	50.07	0.57	rgb(223,108,109)	1.9925	None
Stat3	Mfsd2a	0.98263	50.07	0.57	rgb(223,108,109)	1.9925	None
Stat3	Ticam2	-0.98263	50.07	-0.57	rgb( 94,142,238)	1.9925	None
Stat4	4930523C07Rik	-0.98263	50.07	-0.57	rgb( 94,142,238)	1.9925	None
Tcf3	Srsf12	0.98263	50.07	0.573	rgb(223,108,109)	1.9925	None
Tet2	Zfp568	0.98263	50.07	0.571	rgb(223,108,109)	1.9925	2,2
Zeb1	Rab4b	0.98263	50.07	0.575	rgb(223,107,108)	1.9925	None
Zfp148	Zbtb4	0.98263	50.07	0.574	rgb(223,107,109)	1.9925	None
Zfp219	Stx1a	-0.98263	50.07	-0.57	rgb( 93,142,239)	1.9925	None
Zfp362	Mmp7	-0.98263	50.07	-0.57	rgb( 93,141,239)	1.9925	2,2
Zfp367	Fam111a	0.98263	50.07	0.572	rgb(223,108,109)	1.9925	2,2
Zfp385a	Phlda3	0.98263	50.07	0.567	rgb(223,109,110)	1.9925	2,2
Zfp827	Rrad	-0.98263	50.07	-0.57	rgb( 93,142,239)	1.9925	2,2
Zfp944	L1cam	0.98263	50.07	0.568	rgb(223,109,110)	1.9925	2,2
Zkscan17	Cs	0.98263	50.07	0.57	rgb(223,108,109)	1.9925	2,2
Arid3a	Cpd	0.98127	50.06	0.564	rgb(223,109,110)	1.9923	None
Arid3a	Pdxp	0.98127	50.06	0.557	rgb(223,111,112)	1.9923	None
Arid3a	Zfp36l1	-0.98127	50.06	-0.56	rgb( 96,143,238)	1.9923	None
Atf3	Ucp2	-0.98127	50.06	-0.56	rgb( 96,143,238)	1.9923	None
Atf3	Vldlr	0.98127	50.06	0.564	rgb(223,109,110)	1.9923	None
Batf	Cd47	-0.98127	50.06	-0.56	rgb( 95,143,238)	1.9923	None
Batf	Slamf9	-0.98127	50.06	-0.56	rgb( 96,143,238)	1.9923	None
Bcl11b	Ncoa1	0.98127	50.06	0.561	rgb(223,110,111)	1.9923	None
Cebpg	Plekho2	-0.98127	50.06	-0.56	rgb( 95,143,238)	1.9923	None
Creb1	Il4ra	-0.98127	50.06	-0.56	rgb( 96,144,238)	1.9923	None
E2f1	Tbccd1	0.98127	50.06	0.563	rgb(223,109,111)	1.9923	None
E2f1	Tnk2	0.98127	50.06	0.56	rgb(223,110,111)	1.9923	None
E2f4	Txndc17	-0.98127	50.06	-0.56	rgb( 95,143,238)	1.9923	None
Ets2	Nfatc2	-0.98127	50.06	-0.56	rgb( 97,144,238)	1.9923	None
Etv4	Pdgfrb	0.98127	50.06	0.563	rgb(223,109,111)	1.9923	2,2
Fos	Ifi27l2a	0.98127	50.06	0.558	rgb(223,111,112)	1.9923	None
Fosl2	Acp5	0.98127	50.06	0.555	rgb(223,111,112)	1.9923	None
Fosl2	Lrmp	-0.98127	50.06	-0.56	rgb( 95,143,238)	1.9923	None
Foxf2	Adora2b	0.98127	50.06	0.561	rgb(223,110,111)	1.9923	2,2
Foxf2	Lsp1	-0.98127	50.06	-0.56	rgb( 96,143,238)	1.9923	2,2
Foxo3	Abhd2	0.98127	50.06	0.558	rgb(223,110,112)	1.9923	None
Foxo3	Narf	0.98127	50.06	0.56	rgb(223,110,111)	1.9923	None
Foxo3	Ptp4a3	0.98127	50.06	0.556	rgb(223,111,112)	1.9923	None
Hsf1	Guca1a	-0.98127	50.06	-0.56	rgb( 95,143,238)	1.9923	None
Ikzf2	Gucy2e	0.98127	50.06	0.561	rgb(223,110,111)	1.9923	2,2
Ikzf3	Tal2	-0.98127	50.06	-0.56	rgb( 95,143,238)	1.9923	None
Irf1	Gimap4	0.98127	50.06	0.556	rgb(223,111,112)	1.9923	None
Irf2	Apbb1ip	0.98127	50.06	0.565	rgb(223,109,110)	1.9923	None
Irf4	Cxcl3	-0.98127	50.06	-0.56	rgb( 96,143,238)	1.9923	None
Irf7	Ifi27l2a	0.98127	50.06	0.564	rgb(223,109,110)	1.9923	None
Klf13	Ndrg1	0.98127	50.06	0.562	rgb(223,110,111)	1.9923	None
Klf4	Cacna1s	0.98127	50.06	0.555	rgb(223,111,112)	1.9923	2,2
Klf6	Chst3	-0.98127	50.06	-0.56	rgb( 96,143,238)	1.9923	2,2
Klf8	Tspan17	0.98127	50.06	0.564	rgb(223,109,110)	1.9923	None
Msc	Cndp2	0.98127	50.06	0.559	rgb(223,110,111)	1.9923	2,2
Mxi1	Bend3	-0.98127	50.06	-0.56	rgb( 94,142,238)	1.9923	None
Nfatc2	Jak3	0.98127	50.06	0.557	rgb(223,111,112)	1.9923	None
Nfatc4	Gpr153	0.98127	50.06	0.56	rgb(223,110,111)	1.9923	2,2
Nfkb2	Kif13b	0.98127	50.06	0.557	rgb(223,111,112)	1.9923	2,2
Nfkb2	Tspan3	0.98127	50.06	0.556	rgb(223,111,112)	1.9923	None
Nr4a1	Nr4a3	0.98127	50.06	0.565	rgb(223,109,110)	1.9923	2,2
Nr4a2	Upb1	0.98127	50.06	0.563	rgb(223,109,111)	1.9923	None
Patz1	Sgsm2	0.98127	50.06	0.56	rgb(223,110,111)	1.9923	None
Plag1	Fam132b	-0.98127	50.06	-0.56	rgb( 96,143,238)	1.9923	None
Pparg	Dgkk	0.98127	50.06	0.563	rgb(223,109,111)	1.9923	2,2
Rfx1	Krtcap2	-0.98127	50.06	-0.56	rgb( 95,143,238)	1.9923	None
Rorc	Cd5l	0.98127	50.06	0.563	rgb(223,110,111)	1.9923	None
Rxra	Btbd11	0.98127	50.06	0.558	rgb(223,110,112)	1.9923	None
Rxra	Il12rb1	0.98127	50.06	0.561	rgb(223,110,111)	1.9923	None
Rxra	Tspan2	0.98127	50.06	0.563	rgb(223,109,111)	1.9923	None
Sgsm2	Ivd	0.98127	50.06	0.561	rgb(223,110,111)	1.9923	2,2
Smad3	Tmem19	-0.98127	50.06	-0.56	rgb( 96,143,238)	1.9923	None
Sp3	Aldoart2	-0.98127	50.06	-0.56	rgb( 95,143,238)	1.9923	None
Sp3	Herc4	0.98127	50.06	0.557	rgb(223,111,112)	1.9923	None
Sp4	Pex19	-0.98127	50.06	-0.56	rgb( 95,143,238)	1.9923	None
Sp4	Utp20	-0.98127	50.06	-0.56	rgb( 95,143,238)	1.9923	None
Tcf12	1190002N15Rik	-0.98127	50.06	-0.56	rgb( 96,143,238)	1.9923	None
Tcf12	Pafah1b3	-0.98127	50.06	-0.56	rgb( 96,144,238)	1.9923	2,2
Tead1	B4galt1	0.98127	50.06	0.564	rgb(223,109,110)	1.9923	None
Tead1	Nrp1	0.98127	50.06	0.557	rgb(223,111,112)	1.9923	None
Thra	Fam26f	-0.98127	50.06	-0.56	rgb( 95,143,238)	1.9923	None
Tulp3	Hist3h2bb-ps	-0.98127	50.06	-0.56	rgb( 95,143,238)	1.9923	2,2
Twist1	Fam160a1	0.98127	50.06	0.564	rgb(223,109,110)	1.9923	2,2
Vax2	Myo3b	-0.98127	50.06	-0.56	rgb( 95,143,238)	1.9923	None
Vax2	Ppp1r14c	0.98127	50.06	0.561	rgb(223,110,111)	1.9923	2,2
Xbp1	9930014A18Rik	-0.98127	50.06	-0.56	rgb( 95,143,238)	1.9923	None
Zbtb7c	Scarf2	0.98127	50.06	0.564	rgb(223,109,110)	1.9923	2,2
Zeb2	Ptger2	0.98127	50.06	0.563	rgb(223,109,111)	1.9923	2,2
Zeb2	Srxn1	0.98127	50.06	0.558	rgb(223,110,112)	1.9923	2,2
Zfp358	Sorcs2	-0.98127	50.06	-0.56	rgb( 95,143,238)	1.9923	2,2
Zfp473	Fkrp	-0.98127	50.06	-0.56	rgb( 96,143,238)	1.9923	2,2
Zfp536	Pls1	0.98127	50.06	0.561	rgb(223,110,111)	1.9923	2,2
Zfp750	Robo3	0.98127	50.06	0.562	rgb(223,110,111)	1.9923	2,2
Atf2	Pgm2	-0.98012	50.06	-0.56	rgb( 97,144,238)	1.9923	None
Cebpb	Calcrl	0.98012	50.06	0.564	rgb(223,109,110)	1.9923	None
Dmrt1	Cd81	-0.98012	50.06	-0.56	rgb( 96,143,238)	1.9923	2,2
E2f1	Nfatc2	0.98012	50.06	0.556	rgb(223,111,112)	1.9923	None
E2f4	Rabggta	-0.98012	50.06	-0.56	rgb( 97,144,238)	1.9923	None
Ebf1	Dip2b	0.98012	50.06	0.561	rgb(223,110,111)	1.9923	None
Egr1	Tyms	0.98012	50.06	0.558	rgb(223,110,112)	1.9923	None
Elf1	Abi3	-0.98012	50.06	-0.56	rgb( 96,144,238)	1.9923	None
Fos	Vamp2	-0.98012	50.06	-0.56	rgb( 96,143,238)	1.9923	None
Fosl1	Lta	0.98012	50.06	0.559	rgb(223,110,111)	1.9923	None
Fosl2	Sord	0.98012	50.06	0.556	rgb(223,111,112)	1.9923	None
Hif1a	Agl	0.98012	50.06	0.555	rgb(223,111,112)	1.9923	None
Hif1a	Eif4ebp1	0.98012	50.06	0.559	rgb(223,110,111)	1.9923	None
Hif1a	Ndufv3	0.98012	50.06	0.561	rgb(223,110,111)	1.9923	None
Hif1a	Stc1	0.98012	50.06	0.555	rgb(223,111,112)	1.9923	None
Irf4	Adck3	-0.98012	50.06	-0.56	rgb( 96,143,238)	1.9923	None
Irf4	Gbp5	0.98012	50.06	0.555	rgb(223,111,112)	1.9923	None
Irf4	Il1rn	0.98012	50.06	0.557	rgb(223,111,112)	1.9923	None
Irf4	Pml	0.98012	50.06	0.559	rgb(223,110,111)	1.9923	None
Irf4	Ripk2	-0.98012	50.06	-0.56	rgb( 94,142,238)	1.9923	None
Irf4	Xdh	-0.98012	50.06	-0.56	rgb( 96,143,238)	1.9923	None
Irf8	Rab19	0.98012	50.06	0.555	rgb(223,111,112)	1.9923	None
Junb	Tnip3	-0.98012	50.06	-0.56	rgb( 95,143,238)	1.9923	None
Kdm5b	Rasgef1b	-0.98012	50.06	-0.56	rgb( 95,143,238)	1.9923	2,2
Lef1	Cnnm3	0.98012	50.06	0.563	rgb(223,110,111)	1.9923	None
Maf	Agl	-0.98012	50.06	-0.56	rgb( 95,143,238)	1.9923	None
Maf	Aldoc	-0.98012	50.06	-0.56	rgb( 96,143,238)	1.9923	None
Mxd1	Aim1	0.98012	50.06	0.557	rgb(223,111,112)	1.9923	2,2
Mybl1	3110057O12Rik	0.98012	50.06	0.558	rgb(223,110,112)	1.9923	2,2
Nfkb1	Heg1	0.98012	50.06	0.561	rgb(223,110,111)	1.9923	None
Nfkb2	Ccdc50	0.98012	50.06	0.564	rgb(223,109,110)	1.9923	None
Plscr1	Asns	0.98012	50.06	0.561	rgb(223,110,111)	1.9923	2,2
Pou6f1	Aim1	-0.98012	50.06	-0.56	rgb( 96,143,238)	1.9923	2,2
Rel	Anxa3	0.98012	50.06	0.562	rgb(223,110,111)	1.9923	None
Rora	Ppp1r14c	0.98012	50.06	0.559	rgb(223,110,111)	1.9923	2,2
Rorc	Hvcn1	0.98012	50.06	0.559	rgb(223,110,111)	1.9923	None
Rorc	Ski	0.98012	50.06	0.559	rgb(223,110,111)	1.9923	None
Rxra	Fam196a	0.98012	50.06	0.558	rgb(223,110,112)	1.9923	2,2
Rxra	Fam19a3	0.98012	50.06	0.559	rgb(223,110,111)	1.9923	None
Satb1	Crat	-0.98012	50.06	-0.56	rgb( 95,143,238)	1.9923	None
Smad3	Ctla2b	0.98012	50.06	0.564	rgb(223,109,110)	1.9923	None
Sp4	Capn2	-0.98012	50.06	-0.56	rgb( 96,144,238)	1.9923	None
Sp4	Ero1l	0.98012	50.06	0.558	rgb(223,110,112)	1.9923	None
Sp4	Hk2	0.98012	50.06	0.563	rgb(223,109,111)	1.9923	None
Sp4	Klf13	-0.98012	50.06	-0.56	rgb( 95,143,238)	1.9923	None
Sp4	Rgs14	-0.98012	50.06	-0.56	rgb( 96,143,238)	1.9923	None
Stat3	Atp2b4	0.98012	50.06	0.563	rgb(223,109,111)	1.9923	None
Stat3	Cyth3	-0.98012	50.06	-0.56	rgb( 96,144,238)	1.9923	None
Stat3	Trat1	-0.98012	50.06	-0.56	rgb( 96,144,238)	1.9923	None
Tcf12	Epc1	-0.98012	50.06	-0.56	rgb( 97,144,238)	1.9923	None
Tef	Pck2	0.98012	50.06	0.56	rgb(223,110,111)	1.9923	None
Trp53	Phlda3	0.98012	50.06	0.559	rgb(223,110,111)	1.9923	None
Twist1	Acss1	0.98012	50.06	0.562	rgb(223,110,111)	1.9923	None
Zbed6	Zfp445	0.98012	50.06	0.557	rgb(223,111,112)	1.9923	2,2
Zbtb1	Abcb9	-0.98012	50.06	-0.56	rgb( 95,143,238)	1.9923	2,2
Zfp300	Maged2	0.98012	50.06	0.555	rgb(223,111,112)	1.9923	2,2
Zfp318	Adora2b	-0.98012	50.06	-0.56	rgb( 95,143,238)	1.9923	2,2
Zfp385a	9030617O03Rik	0.98012	50.06	0.555	rgb(223,111,112)	1.9923	2,2
Zfp429	Snhg6	0.98012	50.06	0.562	rgb(223,110,111)	1.9923	2,2
Zfp473	Sema6b	0.98012	50.06	0.558	rgb(223,110,112)	1.9923	2,2
Zfp53	Unc13b	-0.98012	50.06	-0.56	rgb( 95,143,238)	1.9923	2,2
Zfp882	Proz	0.98012	50.06	0.556	rgb(223,111,112)	1.9923	2,2
Akna	Taf7	-0.97883	50.05	-0.55	rgb( 98,145,238)	1.9921	2,2
Ar	Zfp831	0.97883	50.05	0.548	rgb(223,112,113)	1.9921	None
Atf5	Hmox1	0.97883	50.05	0.55	rgb(223,112,113)	1.9921	None
Batf3	Ppap2c	0.97883	50.05	0.547	rgb(223,113,114)	1.9921	2,2
Bcl6b	Dram2	-0.97883	50.05	-0.55	rgb( 98,145,238)	1.9921	None
Bhlhe40	Anln	0.97883	50.05	0.548	rgb(223,112,113)	1.9921	None
C030039L03Rik	3110057O12Rik	0.97883	50.05	0.549	rgb(223,112,113)	1.9921	2,2
Cebpb	Slc1a4	0.97883	50.05	0.546	rgb(223,113,114)	1.9921	2,2
Cebpg	Gpt2	0.97883	50.05	0.552	rgb(223,112,113)	1.9921	2,2
Creb3l2	Cyfip2	0.97883	50.05	0.546	rgb(223,113,114)	1.9921	None
Cux1	Epb4.1l2	0.97883	50.05	0.551	rgb(223,112,113)	1.9921	2,2
Egr1	Pank2	-0.97883	50.05	-0.55	rgb( 98,145,238)	1.9921	None
Elf1	Dzip1	0.97883	50.05	0.546	rgb(223,113,114)	1.9921	None
Elf1	Scml4	0.97883	50.05	0.55	rgb(223,112,113)	1.9921	None
Elk4	Tacc1	0.97883	50.05	0.55	rgb(223,112,113)	1.9921	2,2
Epas1	Rnd3	0.97883	50.05	0.55	rgb(223,112,113)	1.9921	2,2
Ets1	Map3k1	0.97883	50.05	0.553	rgb(223,111,112)	1.9921	None
Ets1	Pdcd1lg2	-0.97883	50.05	-0.55	rgb( 99,145,238)	1.9921	None
Fosl2	Itga3	0.97883	50.05	0.552	rgb(223,111,113)	1.9921	None
Gabpa	Ccdc50	0.97883	50.05	0.551	rgb(223,112,113)	1.9921	None
Gata3	Ccr8	0.97883	50.05	0.547	rgb(223,112,114)	1.9921	None
Irf4	Dusp22	-0.97883	50.05	-0.55	rgb( 98,145,238)	1.9921	None
Irf4	Vsig2	-0.97883	50.05	-0.55	rgb( 98,145,238)	1.9921	None
Irf4	Zdhhc15	-0.97883	50.05	-0.55	rgb( 98,145,238)	1.9921	None
Irf5	Gfi1	-0.97883	50.05	-0.55	rgb( 97,144,238)	1.9921	None
Irf5	Nostrin	0.97883	50.05	0.547	rgb(223,113,114)	1.9921	2,2
Jun	Pmepa1	0.97883	50.05	0.554	rgb(223,111,112)	1.9921	None
Lin54	Anln	0.97883	50.05	0.548	rgb(223,112,114)	1.9921	None
Mxi1	Rnf181	0.97883	50.05	0.549	rgb(223,112,113)	1.9921	None
Nfatc1	Foxp4	0.97883	50.05	0.55	rgb(223,112,113)	1.9921	None
Osr2	Serpinb1b	0.97883	50.05	0.552	rgb(223,111,113)	1.9921	2,2
Plagl1	Eml1	0.97883	50.05	0.55	rgb(223,112,113)	1.9921	2,2
Pou6f1	Txk	0.97883	50.05	0.549	rgb(223,112,113)	1.9921	2,2
Prdm9	Napb	0.97883	50.05	0.555	rgb(223,111,112)	1.9921	2,2
Prrx1	Ccdc80	0.97883	50.05	0.549	rgb(223,112,113)	1.9921	2,2
Rarg	Cd9	0.97883	50.05	0.547	rgb(223,113,114)	1.9921	None
Rel	Chm	-0.97883	50.05	-0.55	rgb( 97,144,238)	1.9921	None
Rora	Hdc	-0.97883	50.05	-0.55	rgb( 98,144,238)	1.9921	None
Rorc	Tnfrsf25	0.97883	50.05	0.553	rgb(223,111,113)	1.9921	None
Rxra	Mpp2	0.97883	50.05	0.551	rgb(223,112,113)	1.9921	None
Rxra	Wisp1	0.97883	50.05	0.55	rgb(223,112,113)	1.9921	None
Scrt1	Akna	0.97883	50.05	0.548	rgb(223,112,114)	1.9921	None
Scrt1	Myo3b	0.97883	50.05	0.55	rgb(223,112,113)	1.9921	None
Scrt1	Trim3	0.97883	50.05	0.547	rgb(223,113,114)	1.9921	2,2
Six5	Rcan3	-0.97883	50.05	-0.55	rgb( 97,144,238)	1.9921	None
Sp2	Sav1	0.97883	50.05	0.548	rgb(223,112,113)	1.9921	None
Sp4	Dhrs4	-0.97883	50.05	-0.55	rgb( 98,145,238)	1.9921	None
Srebf1	Fzd7	0.97883	50.05	0.547	rgb(223,112,114)	1.9921	2,2
Stat4	Ehbp1	0.97883	50.05	0.55	rgb(223,112,113)	1.9921	None
Tcf3	Ormdl1	-0.97883	50.05	-0.55	rgb( 98,144,238)	1.9921	None
Tead1	Faim3	0.97883	50.05	0.552	rgb(223,111,113)	1.9921	2,2
Tfdp2	Rfwd3	0.97883	50.05	0.552	rgb(223,112,113)	1.9921	None
Tsc22d1	Rasgef1b	0.97883	50.05	0.546	rgb(223,113,114)	1.9921	2,2
Vax2	Cxcl3	0.97883	50.05	0.549	rgb(223,112,113)	1.9921	2,2
Vdr	Efna5	0.97883	50.05	0.555	rgb(223,111,112)	1.9921	None
Xbp1	Gemin6	-0.97883	50.05	-0.55	rgb( 97,144,238)	1.9921	2,2
Yy2	Pdhx	0.97883	50.05	0.547	rgb(223,113,114)	1.9921	None
Zbtb4	Pde4a	0.97883	50.05	0.552	rgb(223,112,113)	1.9921	None
Zbtb7b	Acot11	0.97883	50.05	0.554	rgb(223,111,112)	1.9921	2,2
Zbtb7b	Itpr3	0.97883	50.05	0.548	rgb(223,112,114)	1.9921	None
Zeb1	C920009B18Rik	0.97883	50.05	0.555	rgb(223,111,112)	1.9921	None
Zfp148	Adam10	0.97883	50.05	0.548	rgb(223,112,113)	1.9921	None
Zfp184	Maoa	0.97883	50.05	0.555	rgb(223,111,112)	1.9921	2,2
Zfp219	Cd81	0.97883	50.05	0.548	rgb(223,112,113)	1.9921	None
Zfp385a	Gja1	0.97883	50.05	0.554	rgb(223,111,112)	1.9921	2,2
Zfp385a	Robo3	0.97883	50.05	0.553	rgb(223,111,112)	1.9921	2,2
Zfp39	Gigyf2	0.97883	50.05	0.547	rgb(223,113,114)	1.9921	2,2
Zfp750	Ckmt1	0.97883	50.05	0.551	rgb(223,112,113)	1.9921	2,2
Zkscan17	Icam2	-0.97883	50.05	-0.55	rgb( 99,145,238)	1.9921	2,2
Atf6	Chchd7	0.97757	50.05	0.55	rgb(223,112,113)	1.9921	None
Atf6	Dctpp1	0.97757	50.05	0.545	rgb(223,113,114)	1.9921	None
Atf6	Ypel5	0.97757	50.05	0.548	rgb(223,112,113)	1.9921	None
Batf	Cacng4	0.97757	50.05	0.554	rgb(223,111,112)	1.9921	None
Casz1	Itih5	-0.97757	50.05	-0.55	rgb( 98,145,238)	1.9921	2,2
Cebpb	Erap1	-0.97757	50.05	-0.55	rgb( 99,145,238)	1.9921	None
Cebpg	Smox	0.97757	50.05	0.545	rgb(223,113,114)	1.9921	None
Ebf1	Rassf3	0.97757	50.05	0.547	rgb(223,112,114)	1.9921	None
Egr1	Apitd1	0.97757	50.05	0.552	rgb(223,111,113)	1.9921	None
Egr2	Fut8	-0.97757	50.05	-0.55	rgb( 99,145,238)	1.9921	None
Erg	4632428N05Rik	0.97757	50.05	0.552	rgb(223,112,113)	1.9921	2,2
Erg	Cd83	-0.97757	50.05	-0.55	rgb( 98,145,238)	1.9921	None
Fosl2	Chit1	0.97757	50.05	0.55	rgb(223,112,113)	1.9921	None
Fosl2	Eid1	0.97757	50.05	0.546	rgb(223,113,114)	1.9921	None
Fosl2	Rnh1	0.97757	50.05	0.551	rgb(223,112,113)	1.9921	None
Foxc1	Hspa12a	0.97757	50.05	0.549	rgb(223,112,113)	1.9921	2,2
Foxf2	Tnfrsf19	0.97757	50.05	0.545	rgb(223,113,114)	1.9921	None
Foxn3	Upb1	0.97757	50.05	0.547	rgb(223,113,114)	1.9921	2,2
Gata2	Pcbd1	0.97757	50.05	0.554	rgb(223,111,112)	1.9921	2,2
Hif1a	Vegfa	0.97757	50.05	0.554	rgb(223,111,112)	1.9921	None
Irf4	Aes	0.97757	50.05	0.546	rgb(223,113,114)	1.9921	None
Irf4	Cnksr3	-0.97757	50.05	-0.55	rgb( 98,144,238)	1.9921	None
Irf4	Eml1	-0.97757	50.05	-0.55	rgb( 99,145,238)	1.9921	None
Irf4	Mtss1	0.97757	50.05	0.55	rgb(223,112,113)	1.9921	None
Irf4	Npc2	0.97757	50.05	0.549	rgb(223,112,113)	1.9921	None
Irf4	Rab11fip1	-0.97757	50.05	-0.55	rgb( 97,144,238)	1.9921	None
Irf4	Tmod1	-0.97757	50.05	-0.55	rgb( 98,145,238)	1.9921	None
Irf7	Cd47	0.97757	50.05	0.552	rgb(223,112,113)	1.9921	None
Jun	Plod2	0.97757	50.05	0.553	rgb(223,111,113)	1.9921	None
Klf2	Fam49b	0.97757	50.05	0.545	rgb(223,113,114)	1.9921	None
Mxi1	Stk39	-0.97757	50.05	-0.55	rgb( 97,144,238)	1.9921	None
Myc	Cdk5r1	0.97757	50.05	0.55	rgb(223,112,113)	1.9921	None
Nkx3-1	Fut8	0.97757	50.05	0.547	rgb(223,113,114)	1.9921	None
Nr1d1	Fhod3	0.97757	50.05	0.549	rgb(223,112,113)	1.9921	None
Pou2f2	Ifitm3	0.97757	50.05	0.551	rgb(223,112,113)	1.9921	None
Rara	Il10rb	0.97757	50.05	0.554	rgb(223,111,112)	1.9921	None
Rorc	Fgfr1	-0.97757	50.05	-0.55	rgb( 98,144,238)	1.9921	None
Rorc	Il22	0.97757	50.05	0.554	rgb(223,111,112)	1.9921	None
Rorc	Sell	-0.97757	50.05	-0.55	rgb( 98,145,238)	1.9921	None
Rreb1	Gdi1	0.97757	50.05	0.552	rgb(223,112,113)	1.9921	None
Rxra	Clcnkb	0.97757	50.05	0.551	rgb(223,112,113)	1.9921	None
Sall4	Foxp3	0.97757	50.05	0.55	rgb(223,112,113)	1.9921	None
Satb1	Lrp12	0.97757	50.05	0.548	rgb(223,112,113)	1.9921	None
Smad3	Cxcr5	0.97757	50.05	0.552	rgb(223,112,113)	1.9921	None
Smad3	Epb4.1l2	0.97757	50.05	0.552	rgb(223,112,113)	1.9921	2,2
Sox5	Nsun6	0.97757	50.05	0.551	rgb(223,112,113)	1.9921	None
Sp4	Znrf1	-0.97757	50.05	-0.55	rgb( 97,144,238)	1.9921	None
Srebf1	Clk3	0.97757	50.05	0.552	rgb(223,112,113)	1.9921	None
Stat3	Mndal	-0.97757	50.05	-0.55	rgb( 97,144,238)	1.9921	None
Stat3	Serpinf1	0.97757	50.05	0.551	rgb(223,112,113)	1.9921	None
Stat3	Slc39a1	0.97757	50.05	0.553	rgb(223,111,113)	1.9921	None
Stat4	Tnfsf11	-0.97757	50.05	-0.55	rgb( 98,145,238)	1.9921	None
Stat5b	Tnfsf8	0.97757	50.05	0.553	rgb(223,111,113)	1.9921	None
Tcf3	Sidt1	0.97757	50.05	0.55	rgb(223,112,113)	1.9921	None
Tef	Herc4	0.97757	50.05	0.548	rgb(223,112,113)	1.9921	None
Tet1	Pcdh7	0.97757	50.05	0.553	rgb(223,111,112)	1.9921	None
Tigd2	Mcm9	-0.97757	50.05	-0.55	rgb( 97,144,238)	1.9921	2,2
Trp53	Rhod	0.97757	50.05	0.546	rgb(223,113,114)	1.9921	None
Zbtb33	Lysmd4	-0.97757	50.05	-0.55	rgb( 98,144,238)	1.9921	None
Zfp111	Ccdc125	-0.97757	50.05	-0.55	rgb( 97,144,238)	1.9921	2,2
Zfp202	Gpr146	0.97757	50.05	0.551	rgb(223,112,113)	1.9921	None
Zfp26	Nucks1	0.97757	50.05	0.545	rgb(223,113,114)	1.9921	2,2
Zfp281	Prrt2	0.97757	50.05	0.551	rgb(223,112,113)	1.9921	None
Zfp35	Dhrs4	0.97757	50.05	0.553	rgb(223,111,113)	1.9921	2,2
Zfp385a	Zfp365	0.97757	50.05	0.546	rgb(223,113,114)	1.9921	2,2
Zfp426	Gpr34	0.97757	50.05	0.551	rgb(223,112,113)	1.9921	2,2
Zfp664	Acvrl1	-0.97757	50.05	-0.55	rgb( 97,144,238)	1.9921	2,2
Zfp808	Pla2g4c	0.97757	50.05	0.546	rgb(223,113,114)	1.9921	2,2
Akna	Proz	0.97634	50.04	0.538	rgb(223,114,115)	1.9919	2,2
Arid5a	Hps6	0.97634	50.04	0.539	rgb(223,114,115)	1.9919	None
Bhlhe40	Adamts17	-0.97634	50.04	-0.54	rgb(100,146,237)	1.9919	None
Bhlhe40	Plekho2	0.97634	50.04	0.544	rgb(223,113,114)	1.9919	None
C030039L03Rik	Prkab2	0.97634	50.04	0.538	rgb(223,114,115)	1.9919	2,2
Cebpg	Aldh1l2	0.97634	50.04	0.538	rgb(223,114,115)	1.9919	2,2
Cebpg	Ipmk	0.97634	50.04	0.541	rgb(223,114,115)	1.9919	2,2
Cebpg	Reep3	-0.97634	50.04	-0.54	rgb(100,146,237)	1.9919	None
Creb3l2	Dennd3	0.97634	50.04	0.543	rgb(223,113,114)	1.9919	None
Csrnp1	1110057K04Rik	-0.97634	50.04	-0.54	rgb(100,146,238)	1.9919	2,2
Drap1	Gmfg	0.97634	50.04	0.54	rgb(223,114,115)	1.9919	2,2
E2f4	Slc2a1	0.97634	50.04	0.544	rgb(223,113,114)	1.9919	None
Egr2	Pten	-0.97634	50.04	-0.54	rgb( 99,145,238)	1.9919	None
Elf1	Stat4	0.97634	50.04	0.54	rgb(223,114,115)	1.9919	None
Etv4	Aldh1l2	0.97634	50.04	0.543	rgb(223,113,114)	1.9919	None
Fli1	Slc9a8	-0.97634	50.04	-0.54	rgb(100,146,238)	1.9919	None
Fosl2	Gimap8	0.97634	50.04	0.538	rgb(223,114,115)	1.9919	None
Gabpa	Capn2	-0.97634	50.04	-0.54	rgb(100,146,237)	1.9919	None
Gata3	4930506M07Rik	0.97634	50.04	0.538	rgb(223,114,115)	1.9919	2,2
Gzf1	BC026585	0.97634	50.04	0.535	rgb(223,115,116)	1.9919	2,2
Hif1a	Dnajc16	0.97634	50.04	0.543	rgb(223,113,114)	1.9919	None
Hif3a	Kbtbd13	0.97634	50.04	0.543	rgb(223,113,114)	1.9919	2,2
Hsf1	Mgst3	-0.97634	50.04	-0.54	rgb(101,146,237)	1.9919	None
Irf1	Gbp11	0.97634	50.04	0.536	rgb(223,115,116)	1.9919	None
Irf2	Zfp395	0.97634	50.04	0.543	rgb(223,113,114)	1.9919	None
Irf8	Il2rb	0.97634	50.04	0.543	rgb(223,113,114)	1.9919	None
Jun	Pcyt1b	-0.97634	50.04	-0.54	rgb(100,146,238)	1.9919	2,2
Klf2	Ttyh3	0.97634	50.04	0.538	rgb(223,114,115)	1.9919	2,2
Maf	Stab1	0.97634	50.04	0.539	rgb(223,114,115)	1.9919	None
Mafg	Sesn1	-0.97634	50.04	-0.54	rgb( 99,145,238)	1.9919	None
Nfkb1	Ccr8	0.97634	50.04	0.536	rgb(223,115,116)	1.9919	None
Nr3c1	Tsr2	-0.97634	50.04	-0.54	rgb( 99,145,238)	1.9919	None
Nr4a1	Exoc4	-0.97634	50.04	-0.54	rgb(100,146,237)	1.9919	2,2
Nr4a2	Crtam	0.97634	50.04	0.54	rgb(223,114,115)	1.9919	2,2
Pou6f1	Timd2	-0.97634	50.04	-0.54	rgb(100,146,238)	1.9919	None
Rara	Nsmaf	-0.97634	50.04	-0.54	rgb(100,146,238)	1.9919	None
Rbpj	Nckap1	0.97634	50.04	0.544	rgb(223,113,114)	1.9919	2,2
Rbpj	Nedd4	0.97634	50.04	0.544	rgb(223,113,114)	1.9919	2,2
Rel	Lpxn	-0.97634	50.04	-0.54	rgb(100,146,237)	1.9919	None
Rest	Kcnh4	0.97634	50.04	0.539	rgb(223,114,115)	1.9919	None
Rest	Rfx7	-0.97634	50.04	-0.54	rgb(100,146,237)	1.9919	None
Rxra	Dusp22	-0.97634	50.04	-0.54	rgb( 99,145,238)	1.9919	None
Rxrb	Ahdc1	0.97634	50.04	0.541	rgb(223,114,115)	1.9919	None
Smad3	Ccl3	-0.97634	50.04	-0.54	rgb( 99,145,238)	1.9919	None
Sp110	Max	0.97634	50.04	0.54	rgb(223,114,115)	1.9919	2,2
Sp3	Tulp3	-0.97634	50.04	-0.54	rgb(101,146,237)	1.9919	None
Sp4	Acox3	0.97634	50.04	0.538	rgb(223,114,115)	1.9919	None
Sp4	Pdzd4	0.97634	50.04	0.544	rgb(223,113,114)	1.9919	None
Srf	Exosc8	-0.97634	50.04	-0.54	rgb( 99,145,238)	1.9919	None
Stat2	Sdc3	0.97634	50.04	0.538	rgb(223,114,115)	1.9919	None
Tal2	Nfkbie	0.97634	50.04	0.536	rgb(223,115,116)	1.9919	None
Tal2	Tmem38b	0.97634	50.04	0.543	rgb(223,113,114)	1.9919	2,2
Tead1	Cd2	0.97634	50.04	0.538	rgb(223,114,115)	1.9919	None
Tead1	Stxbp6	0.97634	50.04	0.542	rgb(223,113,114)	1.9919	None
Thap3	Dpm3	0.97634	50.04	0.544	rgb(223,113,114)	1.9919	2,2
Vax2	Il17a	0.97634	50.04	0.537	rgb(223,114,115)	1.9919	2,2
Zbtb17	Mvp	0.97634	50.04	0.536	rgb(223,115,116)	1.9919	2,2
Zbtb17	Snord89	0.97634	50.04	0.538	rgb(223,114,115)	1.9919	2,2
Zeb2	Srgap3	0.97634	50.04	0.537	rgb(223,114,116)	1.9919	2,2
Zfp263	Sema6b	-0.97634	50.04	-0.54	rgb(101,146,237)	1.9919	None
Zfp263	Zfp473	-0.97634	50.04	-0.54	rgb(100,146,237)	1.9919	None
Zfp281	Rasgef1a	0.97634	50.04	0.535	rgb(223,115,116)	1.9919	None
Zfp385a	Ccng1	0.97634	50.04	0.539	rgb(223,114,115)	1.9919	2,2
Zfp516	B4galnt4	0.97634	50.04	0.54	rgb(223,114,115)	1.9919	2,2
Zfx	Vps54	0.97634	50.04	0.535	rgb(223,115,116)	1.9919	None
Zmat1	Fam120c	0.97634	50.04	0.541	rgb(223,114,115)	1.9919	2,2
Arid2	Gprc5a	0.97494	50.04	0.545	rgb(223,113,114)	1.9919	2,2
Arid3a	Dock11	0.97494	50.04	0.541	rgb(223,114,115)	1.9919	None
Atmin	Gramd1b	0.97494	50.04	0.541	rgb(223,114,115)	1.9919	2,2
Batf	Rab11fip1	0.97494	50.04	0.542	rgb(223,113,114)	1.9919	None
Batf	Synpo	-0.97494	50.04	-0.54	rgb( 99,145,238)	1.9919	None
Batf	Tal2	-0.97494	50.04	-0.54	rgb(100,146,237)	1.9919	None
Bcl11b	Dcaf17	-0.97494	50.04	-0.54	rgb(100,146,237)	1.9919	None
Bcl11b	Mmachc	0.97494	50.04	0.541	rgb(223,114,115)	1.9919	None
Bhlhe41	Aldh1l2	0.97494	50.04	0.537	rgb(223,114,115)	1.9919	None
Cebpg	Ncoa1	0.97494	50.04	0.539	rgb(223,114,115)	1.9919	None
Csrnp1	Mxd1	0.97494	50.04	0.537	rgb(223,114,115)	1.9919	2,2
E2f1	Zc3h7b	0.97494	50.04	0.538	rgb(223,114,115)	1.9919	None
E2f4	Dars2	0.97494	50.04	0.542	rgb(223,114,115)	1.9919	None
Elf1	Tnfsf11	0.97494	50.04	0.536	rgb(223,115,116)	1.9919	None
Etv6	Hist1h1d	0.97494	50.04	0.536	rgb(223,115,116)	1.9919	None
Etv6	Mex3d	-0.97494	50.04	-0.54	rgb( 99,145,238)	1.9919	None
Fosl1	Chst12	0.97494	50.04	0.537	rgb(223,114,115)	1.9919	None
Fosl1	Ric8	0.97494	50.04	0.538	rgb(223,114,115)	1.9919	2,2
Fosl2	Fam43a	0.97494	50.04	0.537	rgb(223,114,116)	1.9919	None
Fosl2	Hpcal4	0.97494	50.04	0.542	rgb(223,114,115)	1.9919	None
Foxj1	Tnip3	-0.97494	50.04	-0.54	rgb( 99,145,238)	1.9919	None
Foxn3	Epha3	-0.97494	50.04	-0.54	rgb( 99,146,238)	1.9919	2,2
Foxp1	4930481A15Rik	0.97494	50.04	0.543	rgb(223,113,114)	1.9919	None
Gata1	Stat4	0.97494	50.04	0.544	rgb(223,113,114)	1.9919	None
Gata3	Olr1	0.97494	50.04	0.535	rgb(223,115,116)	1.9919	None
Glis3	Lif	0.97494	50.04	0.538	rgb(223,114,115)	1.9919	None
Hif1a	Vldlr	0.97494	50.04	0.539	rgb(223,114,115)	1.9919	None
Hsf4	Rap2b	0.97494	50.04	0.535	rgb(223,115,116)	1.9919	None
Irf4	Adap1	0.97494	50.04	0.536	rgb(223,115,116)	1.9919	None
Irf4	Arrb2	0.97494	50.04	0.538	rgb(223,114,115)	1.9919	None
Irf4	Nr1d1	0.97494	50.04	0.538	rgb(223,114,115)	1.9919	None
Irf7	Lin54	0.97494	50.04	0.542	rgb(223,114,115)	1.9919	None
Irf9	Ifit2	0.97494	50.04	0.536	rgb(223,115,116)	1.9919	2,2
L3mbtl3	Dcaf17	0.97494	50.04	0.54	rgb(223,114,115)	1.9919	2,2
Lin54	Hist1h1e	0.97494	50.04	0.537	rgb(223,114,116)	1.9919	None
Maf	Alcam	-0.97494	50.04	-0.54	rgb( 99,145,238)	1.9919	None
Maf	Cdk5r1	-0.97494	50.04	-0.54	rgb(100,146,238)	1.9919	None
Maf	Gstt3	-0.97494	50.04	-0.54	rgb(101,146,237)	1.9919	None
Maf	Maf	0.97494	50.04	0.541	rgb(223,114,115)	1.9919	None
Maf	Snhg6	-0.97494	50.04	-0.54	rgb(101,146,237)	1.9919	None
Maf	Specc1	0.97494	50.04	0.535	rgb(223,115,116)	1.9919	None
Mef2b	Ccdc141	0.97494	50.04	0.539	rgb(223,114,115)	1.9919	None
Nfatc2	Synpo	0.97494	50.04	0.538	rgb(223,114,115)	1.9919	None
Nfe2l2	Ypel3	-0.97494	50.04	-0.54	rgb( 99,145,238)	1.9919	None
Nfkb1	Ikzf2	0.97494	50.04	0.545	rgb(223,113,114)	1.9919	None
Pparg	Tpst1	0.97494	50.04	0.538	rgb(223,114,115)	1.9919	None
Prox1	Gbp7	0.97494	50.04	0.536	rgb(223,115,116)	1.9919	None
Rela	Ahnak	0.97494	50.04	0.541	rgb(223,114,115)	1.9919	None
Rorc	Fes	0.97494	50.04	0.538	rgb(223,114,115)	1.9919	None
Rorc	Mgat5	0.97494	50.04	0.544	rgb(223,113,114)	1.9919	None
Rxra	Atp8b1	0.97494	50.04	0.541	rgb(223,114,115)	1.9919	None
Satb1	Basp1	-0.97494	50.04	-0.54	rgb( 99,145,238)	1.9919	None
Satb1	Ninl	0.97494	50.04	0.537	rgb(223,114,115)	1.9919	2,2
Six1	Sh3bp1	0.97494	50.04	0.543	rgb(223,113,114)	1.9919	2,2
Smad3	Col15a1	0.97494	50.04	0.54	rgb(223,114,115)	1.9919	None
Smad3	Grap	-0.97494	50.04	-0.54	rgb(101,146,237)	1.9919	None
Sox6	Kcnq2	0.97494	50.04	0.54	rgb(223,114,115)	1.9919	2,2
Sp4	Atp11a	0.97494	50.04	0.541	rgb(223,114,115)	1.9919	None
Sp4	Dab2ip	0.97494	50.04	0.542	rgb(223,114,115)	1.9919	None
Sp4	Syde2	0.97494	50.04	0.545	rgb(223,113,114)	1.9919	None
Stat1	1600014C10Rik	0.97494	50.04	0.541	rgb(223,114,115)	1.9919	None
Stat3	Hlcs	-0.97494	50.04	-0.54	rgb(100,146,237)	1.9919	None
Stat3	Myo3b	0.97494	50.04	0.54	rgb(223,114,115)	1.9919	None
Stat3	Tmed3	0.97494	50.04	0.539	rgb(223,114,115)	1.9919	None
Stat4	Mapk6	0.97494	50.04	0.538	rgb(223,114,115)	1.9919	2,2
Stat4	Tubb6	-0.97494	50.04	-0.54	rgb( 99,145,238)	1.9919	None
Zbed3	Cd274	-0.97494	50.04	-0.54	rgb(100,146,237)	1.9919	2,2
Zbtb6	Batf	0.97494	50.04	0.538	rgb(223,114,115)	1.9919	None
Zbtb7b	Nckipsd	0.97494	50.04	0.544	rgb(223,113,114)	1.9919	None
Zeb1	Gpatch4	-0.97494	50.04	-0.54	rgb(100,146,238)	1.9919	None
Zfp28	Prdm16	0.97494	50.04	0.54	rgb(223,114,115)	1.9919	2,2
Zfp281	Myadm	0.97494	50.04	0.538	rgb(223,114,115)	1.9919	None
Zfp365	Eda2r	0.97494	50.04	0.537	rgb(223,114,116)	1.9919	2,2
Zfp536	Tmed3	0.97494	50.04	0.537	rgb(223,114,116)	1.9919	2,2
Zfp609	Chic2	-0.97494	50.04	-0.54	rgb(101,146,237)	1.9919	2,2
Ahr	Dmd	0.97339	50.03	0.528	rgb(223,116,117)	1.9917	None
Arid3a	Slco3a1	0.97339	50.03	0.529	rgb(223,116,117)	1.9917	None
Atf3	Gfi1	0.97339	50.03	0.527	rgb(223,116,117)	1.9917	None
Atf5	Rps6ka4	-0.97339	50.03	-0.53	rgb(103,148,237)	1.9917	2,2
Bhlhe40	Ndrg2	0.97339	50.03	0.526	rgb(223,117,118)	1.9917	None
Cebpb	Smad6	0.97339	50.03	0.525	rgb(223,117,118)	1.9917	None
Creb3l2	Syn1	0.97339	50.03	0.534	rgb(223,115,116)	1.9917	2,2
Cux1	Unc93b1	-0.97339	50.03	-0.53	rgb(103,148,237)	1.9917	2,2
Ddit3	Cox6a2	0.97339	50.03	0.529	rgb(223,116,117)	1.9917	2,2
Ddit3	Slc19a2	-0.97339	50.03	-0.53	rgb(103,148,237)	1.9917	None
Ddit3	Soat2	0.97339	50.03	0.526	rgb(223,117,118)	1.9917	None
E2f1	Pml	0.97339	50.03	0.528	rgb(223,116,117)	1.9917	None
Ebf1	Arhgdig	0.97339	50.03	0.526	rgb(223,117,118)	1.9917	None
Egr1	Eci1	-0.97339	50.03	-0.53	rgb(101,147,237)	1.9917	None
Elf1	Cdc14a	0.97339	50.03	0.526	rgb(223,117,118)	1.9917	None
Elf1	Coro7	0.97339	50.03	0.535	rgb(223,115,116)	1.9917	None
Elf1	Evi2a	0.97339	50.03	0.525	rgb(223,117,118)	1.9917	None
Elf1	Syne1	0.97339	50.03	0.529	rgb(223,116,117)	1.9917	None
Erg	C920009B18Rik	-0.97339	50.03	-0.53	rgb(101,146,237)	1.9917	None
Ets1	Ppp1r10	-0.97339	50.03	-0.53	rgb(102,147,237)	1.9917	None
Ets1	Slc15a1	0.97339	50.03	0.531	rgb(223,116,117)	1.9917	None
Etv4	Taf7	-0.97339	50.03	-0.53	rgb(102,147,237)	1.9917	None
Etv6	Hif1a	0.97339	50.03	0.53	rgb(223,116,117)	1.9917	None
Fos	4930523C07Rik	0.97339	50.03	0.527	rgb(223,116,117)	1.9917	None
Foxf2	Gap43	0.97339	50.03	0.527	rgb(223,116,117)	1.9917	2,2
Foxp2	Sh2d4a	0.97339	50.03	0.527	rgb(223,116,117)	1.9917	2,2
Foxp3	Nt5e	0.97339	50.03	0.534	rgb(223,115,116)	1.9917	None
Gtf2ird1	Rcan3	0.97339	50.03	0.532	rgb(223,115,116)	1.9917	None
Hif1a	Hook2	0.97339	50.03	0.533	rgb(223,115,116)	1.9917	None
Hif3a	Nphp3	0.97339	50.03	0.535	rgb(223,115,116)	1.9917	2,2
Hsf1	Son	0.97339	50.03	0.531	rgb(223,116,117)	1.9917	None
Irf1	Rasa4	0.97339	50.03	0.53	rgb(223,116,117)	1.9917	2,2
Irf2	Gatsl2	0.97339	50.03	0.534	rgb(223,115,116)	1.9917	None
Irf4	Gnpda1	0.97339	50.03	0.527	rgb(223,116,117)	1.9917	None
Irf4	Nckap1	-0.97339	50.03	-0.53	rgb(102,147,237)	1.9917	None
Irf4	Peli2	0.97339	50.03	0.533	rgb(223,115,116)	1.9917	None
Irf4	Penk	-0.97339	50.03	-0.53	rgb(103,148,237)	1.9917	None
Irf5	Ctss	0.97339	50.03	0.534	rgb(223,115,116)	1.9917	None
Irf5	St14	0.97339	50.03	0.526	rgb(223,116,118)	1.9917	2,2
Irf5	Tmem19	0.97339	50.03	0.532	rgb(223,115,116)	1.9917	None
Irf7	Mx2	0.97339	50.03	0.534	rgb(223,115,116)	1.9917	None
Irf8	Bcl3	0.97339	50.03	0.533	rgb(223,115,116)	1.9917	None
Jun	Capg	0.97339	50.03	0.529	rgb(223,116,117)	1.9917	None
Jun	Cyth1	0.97339	50.03	0.527	rgb(223,116,117)	1.9917	None
Kdm2b	Pcyox1l	0.97339	50.03	0.527	rgb(223,116,117)	1.9917	2,2
Klf10	Rara	0.97339	50.03	0.525	rgb(223,117,118)	1.9917	None
Klf2	Kcna3	-0.97339	50.03	-0.53	rgb(102,147,237)	1.9917	None
Klf2	Zcwpw1	0.97339	50.03	0.529	rgb(223,116,117)	1.9917	None
Lcorl	Cmtm4	0.97339	50.03	0.53	rgb(223,116,117)	1.9917	2,2
Lyl1	Itgb5	0.97339	50.03	0.527	rgb(223,116,117)	1.9917	2,2
Maf	Pmepa1	0.97339	50.03	0.525	rgb(223,117,118)	1.9917	None
Mef2b	Mapk13	0.97339	50.03	0.527	rgb(223,116,117)	1.9917	2,2
Mxd3	E2f7	0.97339	50.03	0.532	rgb(223,115,117)	1.9917	2,2
Myc	9930014A18Rik	0.97339	50.03	0.529	rgb(223,116,117)	1.9917	None
Nfat5	Eea1	0.97339	50.03	0.53	rgb(223,116,117)	1.9917	None
Nfkb2	Cdk5r1	0.97339	50.03	0.531	rgb(223,116,117)	1.9917	2,2
Patz1	Gart	0.97339	50.03	0.527	rgb(223,116,117)	1.9917	None
Pou2af1	Foxp1	0.97339	50.03	0.528	rgb(223,116,117)	1.9917	None
Pou2af1	Il10ra	-0.97339	50.03	-0.53	rgb(102,147,237)	1.9917	None
Rel	Dock11	0.97339	50.03	0.533	rgb(223,115,116)	1.9917	None
Runx2	Frmd4b	0.97339	50.03	0.534	rgb(223,115,116)	1.9917	None
Rxra	Espn	-0.97339	50.03	-0.53	rgb(102,147,237)	1.9917	None
Snapc2	Fbxo30	-0.97339	50.03	-0.53	rgb(102,147,237)	1.9917	2,2
Sp110	4833439L19Rik	0.97339	50.03	0.531	rgb(223,116,117)	1.9917	2,2
Sp3	Tyms	-0.97339	50.03	-0.53	rgb(102,147,237)	1.9917	None
Sp3	Vdac1	-0.97339	50.03	-0.53	rgb(103,148,237)	1.9917	None
Sp4	Zc3h6	0.97339	50.03	0.532	rgb(223,115,116)	1.9917	None
Tbx21	Icam1	0.97339	50.03	0.533	rgb(223,115,116)	1.9917	2,2
Tbx6	Vasn	0.97339	50.03	0.526	rgb(223,117,118)	1.9917	2,2
Tcf3	Slc9a3r1	0.97339	50.03	0.528	rgb(223,116,117)	1.9917	None
Thra	Tjp3	0.97339	50.03	0.532	rgb(223,115,116)	1.9917	None
Trp53	Tnfrsf10b	0.97339	50.03	0.533	rgb(223,115,116)	1.9917	None
Zbed6	Nfat5	0.97339	50.03	0.526	rgb(223,117,118)	1.9917	2,2
Zbtb33	Nudt4	0.97339	50.03	0.527	rgb(223,116,117)	1.9917	None
Zbtb5	Serpinf1	-0.97339	50.03	-0.53	rgb(103,147,237)	1.9917	2,2
Zbtb7a	Foxj1	0.97339	50.03	0.529	rgb(223,116,117)	1.9917	None
Zbtb7c	Mylk	0.97339	50.03	0.527	rgb(223,116,117)	1.9917	2,2
Zfp219	Stat4	0.97339	50.03	0.527	rgb(223,116,117)	1.9917	None
Zfp260	Sepp1	0.97339	50.03	0.526	rgb(223,116,118)	1.9917	2,2
Zfp281	Ptprc	0.97339	50.03	0.527	rgb(223,116,117)	1.9917	None
Zfp365	Psrc1	0.97339	50.03	0.53	rgb(223,116,117)	1.9917	2,2
Zfp385a	Dcxr	0.97339	50.03	0.525	rgb(223,117,118)	1.9917	2,2
Zfp449	Tcea3	0.97339	50.03	0.526	rgb(223,117,118)	1.9917	2,2
Arid3b	Eci2	0.97181	50.03	0.529	rgb(223,116,117)	1.9917	None
Arid5a	Sdc1	0.97181	50.03	0.528	rgb(223,116,117)	1.9917	2,2
Atf6	Atp6v1g1	0.97181	50.03	0.531	rgb(223,116,117)	1.9917	None
Atf6	Cox7a2l	0.97181	50.03	0.529	rgb(223,116,117)	1.9917	None
Batf	Adamtsl5	0.97181	50.03	0.525	rgb(223,117,118)	1.9917	None
Batf	Nipal1	0.97181	50.03	0.527	rgb(223,116,117)	1.9917	None
Batf	Trim13	0.97181	50.03	0.533	rgb(223,115,116)	1.9917	None
Bcl11b	Trim14	-0.97181	50.03	-0.53	rgb(102,147,237)	1.9917	None
Casz1	Cspg5	0.97181	50.03	0.531	rgb(223,116,117)	1.9917	2,2
Cebpb	Trib3	0.97181	50.03	0.527	rgb(223,116,117)	1.9917	None
Creb5	Mfge8	0.97181	50.03	0.535	rgb(223,115,116)	1.9917	2,2
Dbp	Dgat1	0.97181	50.03	0.529	rgb(223,116,117)	1.9917	None
Ddit3	Naca	-0.97181	50.03	-0.53	rgb(102,147,237)	1.9917	None
E2f4	Gen1	0.97181	50.03	0.525	rgb(223,117,118)	1.9917	None
E2f4	Parp6	-0.97181	50.03	-0.53	rgb(102,147,237)	1.9917	None
Ebf1	Nr4a1	0.97181	50.03	0.534	rgb(223,115,116)	1.9917	None
Elf1	Fam131b	-0.97181	50.03	-0.53	rgb(103,147,237)	1.9917	None
Fosl1	A430005L14Rik	-0.97181	50.03	-0.53	rgb(101,147,237)	1.9917	2,2
Gata1	Itgb3	0.97181	50.03	0.529	rgb(223,116,117)	1.9917	None
Hif1a	Parp9	0.97181	50.03	0.527	rgb(223,116,117)	1.9917	None
Hif1a	Slc41a2	0.97181	50.03	0.531	rgb(223,116,117)	1.9917	None
Hif1a	Thada	-0.97181	50.03	-0.53	rgb(102,147,237)	1.9917	None
Homez	Csnk1e	-0.97181	50.03	-0.53	rgb(102,147,237)	1.9917	2,2
Hoxd4	Il23r	0.97181	50.03	0.531	rgb(223,116,117)	1.9917	None
Ikzf3	Dnmt3a	-0.97181	50.03	-0.53	rgb(102,147,237)	1.9917	None
Irf4	Cnnm3	-0.97181	50.03	-0.53	rgb(101,147,237)	1.9917	None
Irf4	Cxcr6	-0.97181	50.03	-0.53	rgb(101,147,237)	1.9917	None
Irf4	Prickle1	-0.97181	50.03	-0.53	rgb(102,147,237)	1.9917	None
Irf4	Tgoln1	0.97181	50.03	0.532	rgb(223,115,117)	1.9917	None
Irf9	Gbp9	0.97181	50.03	0.533	rgb(223,115,116)	1.9917	None
Klf12	Mdn1	-0.97181	50.03	-0.53	rgb(103,147,237)	1.9917	None
Klf4	Anln	0.97181	50.03	0.525	rgb(223,117,118)	1.9917	None
Klf7	Cmtm8	0.97181	50.03	0.529	rgb(223,116,117)	1.9917	None
Lef1	Anapc1	0.97181	50.03	0.532	rgb(223,115,117)	1.9917	None
Lef1	Cutc	-0.97181	50.03	-0.53	rgb(101,147,237)	1.9917	None
Lin54	Psme1	-0.97181	50.03	-0.53	rgb(103,148,237)	1.9917	None
Litaf	Tfpi	-0.97181	50.03	-0.53	rgb(101,147,237)	1.9917	2,2
Maf	Cd84	-0.97181	50.03	-0.53	rgb(103,148,237)	1.9917	None
Maf	Cndp2	0.97181	50.03	0.535	rgb(223,115,116)	1.9917	None
Maf	Ndrg1	-0.97181	50.03	-0.53	rgb(103,148,237)	1.9917	None
Maf	Prr5l	0.97181	50.03	0.528	rgb(223,116,117)	1.9917	None
Maf	Rilpl2	-0.97181	50.03	-0.53	rgb(103,147,237)	1.9917	None
Maf	Ssh2	0.97181	50.03	0.531	rgb(223,116,117)	1.9917	None
Maf	Traf6	0.97181	50.03	0.531	rgb(223,116,117)	1.9917	None
Meis2	Slamf6	0.97181	50.03	0.53	rgb(223,116,117)	1.9917	None
Meis3	Abcg3	0.97181	50.03	0.531	rgb(223,115,117)	1.9917	None
Mxi1	Igfbp7	-0.97181	50.03	-0.53	rgb(101,147,237)	1.9917	None
Nfatc2	Nrn1	0.97181	50.03	0.528	rgb(223,116,117)	1.9917	None
Nfatc4	Adamts6	0.97181	50.03	0.527	rgb(223,116,117)	1.9917	None
Nfe2l2	Hk2	0.97181	50.03	0.535	rgb(223,115,116)	1.9917	None
Nr4a3	Myb	-0.97181	50.03	-0.53	rgb(102,147,237)	1.9917	2,2
Ppard	Chac1	0.97181	50.03	0.526	rgb(223,117,118)	1.9917	2,2
Pparg	Slc7a1	0.97181	50.03	0.529	rgb(223,116,117)	1.9917	None
Rest	Rab26	0.97181	50.03	0.53	rgb(223,116,117)	1.9917	None
Rfx2	Sh3bp1	0.97181	50.03	0.532	rgb(223,115,116)	1.9917	None
Rorc	Ctla2b	-0.97181	50.03	-0.53	rgb(101,147,237)	1.9917	None
Rorc	S1pr2	0.97181	50.03	0.528	rgb(223,116,117)	1.9917	None
Rxra	Lama1	0.97181	50.03	0.534	rgb(223,115,116)	1.9917	2,2
Rxra	Rgma	0.97181	50.03	0.531	rgb(223,116,117)	1.9917	None
Rxra	Syt9	0.97181	50.03	0.527	rgb(223,116,117)	1.9917	None
Sgsm2	Ccbl2	0.97181	50.03	0.525	rgb(223,117,118)	1.9917	2,2
Six5	Riok3	-0.97181	50.03	-0.53	rgb(102,147,237)	1.9917	None
Smad3	Abi3	0.97181	50.03	0.531	rgb(223,116,117)	1.9917	2,2
Smad3	Tmeff1	0.97181	50.03	0.534	rgb(223,115,116)	1.9917	None
Smad3	Ust	0.97181	50.03	0.528	rgb(223,116,117)	1.9917	None
Smad4	Auh	-0.97181	50.03	-0.53	rgb(101,146,237)	1.9917	None
Sp4	Lgals3	-0.97181	50.03	-0.53	rgb(102,147,237)	1.9917	None
Sp4	Pik3ip1	-0.97181	50.03	-0.53	rgb(102,147,237)	1.9917	None
Sp4	Pla2g12a	0.97181	50.03	0.531	rgb(223,116,117)	1.9917	None
Srebf1	Cdh17	0.97181	50.03	0.534	rgb(223,115,116)	1.9917	2,2
Stat1	Flt3l	0.97181	50.03	0.528	rgb(223,116,117)	1.9917	None
Stat3	Adarb1	0.97181	50.03	0.534	rgb(223,115,116)	1.9917	None
Stat3	Chd7	0.97181	50.03	0.526	rgb(223,117,118)	1.9917	None
Stat3	Grn	0.97181	50.03	0.525	rgb(223,117,118)	1.9917	None
Stat3	Slc17a7	0.97181	50.03	0.53	rgb(223,116,117)	1.9917	None
Thrb	Ahnak	-0.97181	50.03	-0.53	rgb(102,147,237)	1.9917	None
Trp53	Ccng1	0.97181	50.03	0.532	rgb(223,115,117)	1.9917	None
Whsc1	C2cd3	0.97181	50.03	0.53	rgb(223,116,117)	1.9917	2,2
Xbp1	Tas1r3	0.97181	50.03	0.529	rgb(223,116,117)	1.9917	None
Zbtb1	Basp1	0.97181	50.03	0.534	rgb(223,115,116)	1.9917	None
Zfp367	St3gal5	0.97181	50.03	0.534	rgb(223,115,116)	1.9917	2,2
Zfp397	Chst12	-0.97181	50.03	-0.53	rgb(101,147,237)	1.9917	2,2
Zfp52	Mapkbp1	0.97181	50.03	0.53	rgb(223,116,117)	1.9917	2,2
Zfp64	Fbxw2	-0.97181	50.03	-0.53	rgb(102,147,237)	1.9917	2,2
Zfp827	H2-Eb2	0.97181	50.03	0.53	rgb(223,116,117)	1.9917	2,2
Ahctf1	Ppip5k2	0.97006	50.02	0.518	rgb(223,118,119)	1.9915	None
Arid3a	Tox	-0.97006	50.02	-0.52	rgb(105,149,237)	1.9915	None
Bcl6	Acsl6	-0.97006	50.02	-0.52	rgb(104,148,237)	1.9915	None
Bcl6	Tnfrsf25	0.97006	50.02	0.518	rgb(223,118,119)	1.9915	None
Cebpg	Ddit3	0.97006	50.02	0.518	rgb(223,118,119)	1.9915	None
Cebpg	Tsc22d3	0.97006	50.02	0.52	rgb(223,118,119)	1.9915	2,2
Creb3l2	Myo10	0.97006	50.02	0.519	rgb(223,118,119)	1.9915	None
Crem	Plaur	0.97006	50.02	0.518	rgb(223,118,119)	1.9915	None
Cux1	Tgfbr1	0.97006	50.02	0.521	rgb(223,117,118)	1.9915	2,2
Ebf1	Stx7	0.97006	50.02	0.519	rgb(223,118,119)	1.9915	None
Egr1	Hook2	-0.97006	50.02	-0.52	rgb(105,149,237)	1.9915	None
Egr3	Cwh43	-0.97006	50.02	-0.52	rgb(104,148,237)	1.9915	2,2
Erg	B4galt5	0.97006	50.02	0.523	rgb(223,117,118)	1.9915	None
Esrra	Trim3	0.97006	50.02	0.519	rgb(223,118,119)	1.9915	None
Ets1	Naga	0.97006	50.02	0.52	rgb(223,118,119)	1.9915	None
Fosl2	Tspan5	0.97006	50.02	0.521	rgb(223,118,119)	1.9915	None
Foxf2	Akr1b8	0.97006	50.02	0.523	rgb(223,117,118)	1.9915	2,2
Foxo3	Map3k1	0.97006	50.02	0.524	rgb(223,117,118)	1.9915	None
Foxo3	Ppp1r10	0.97006	50.02	0.525	rgb(223,117,118)	1.9915	None
Foxp1	Stx2	-0.97006	50.02	-0.52	rgb(103,148,237)	1.9915	None
Foxs1	S100a4	0.97006	50.02	0.517	rgb(223,118,119)	1.9915	2,2
Gabpa	Rnh1	-0.97006	50.02	-0.52	rgb(103,148,237)	1.9915	None
Gfi1	Bpnt1	-0.97006	50.02	-0.52	rgb(104,148,237)	1.9915	2,2
Hbp1	Zbtb4	0.97006	50.02	0.523	rgb(223,117,118)	1.9915	None
Hey1	Rab26	0.97006	50.02	0.518	rgb(223,118,119)	1.9915	None
Hmgb3	Pla2g4f	0.97006	50.02	0.519	rgb(223,118,119)	1.9915	2,2
Hsf1	Ifi27l2a	-0.97006	50.02	-0.52	rgb(104,148,237)	1.9915	None
Irf1	Nod1	0.97006	50.02	0.523	rgb(223,117,118)	1.9915	None
Irf4	Ccr7	0.97006	50.02	0.523	rgb(223,117,118)	1.9915	None
Irf4	Dlk1	-0.97006	50.02	-0.52	rgb(103,148,237)	1.9915	2,2
Irf5	Cttn	0.97006	50.02	0.517	rgb(223,118,119)	1.9915	2,2
Jun	Ninj1	0.97006	50.02	0.522	rgb(223,117,118)	1.9915	None
Jun	Osm	0.97006	50.02	0.521	rgb(223,117,119)	1.9915	2,2
Klf13	Zscan10	0.97006	50.02	0.523	rgb(223,117,118)	1.9915	None
Lyl1	Spred3	0.97006	50.02	0.521	rgb(223,117,119)	1.9915	None
Maf	Gbp4	-0.97006	50.02	-0.52	rgb(104,148,237)	1.9915	None
Mafg	N4bp2l1	-0.97006	50.02	-0.52	rgb(104,148,237)	1.9915	None
Msc	Ccr1	0.97006	50.02	0.519	rgb(223,118,119)	1.9915	2,2
Mxd3	9530077C05Rik	0.97006	50.02	0.52	rgb(223,118,119)	1.9915	2,2
Mxi1	Serpine1	0.97006	50.02	0.521	rgb(223,117,119)	1.9915	2,2
Mybl1	Kif5c	0.97006	50.02	0.52	rgb(223,118,119)	1.9915	None
Myc	Nfe2	-0.97006	50.02	-0.52	rgb(104,148,237)	1.9915	None
Myc	Tsc22d3	-0.97006	50.02	-0.52	rgb(104,148,237)	1.9915	None
Nfatc2	Foxo1	0.97006	50.02	0.518	rgb(223,118,119)	1.9915	None
Nfkb1	Gngt2	-0.97006	50.02	-0.52	rgb(104,148,237)	1.9915	None
Nfkb2	Cd70	0.97006	50.02	0.515	rgb(223,119,120)	1.9915	None
Nr3c1	Rbfox2	-0.97006	50.02	-0.52	rgb(105,149,237)	1.9915	None
Nr4a2	Abi3	-0.97006	50.02	-0.52	rgb(105,149,237)	1.9915	None
Prdm1	P4hb	0.97006	50.02	0.524	rgb(223,117,118)	1.9915	None
Prrx1	Thbd	0.97006	50.02	0.518	rgb(223,118,119)	1.9915	2,2
Rela	Ifit3	-0.97006	50.02	-0.52	rgb(103,148,237)	1.9915	None
Rest	Uckl1os	0.97006	50.02	0.524	rgb(223,117,118)	1.9915	None
Rest	Whamm	0.97006	50.02	0.52	rgb(223,118,119)	1.9915	None
Rreb1	Klf3	0.97006	50.02	0.518	rgb(223,118,119)	1.9915	None
Rreb1	Rbfox2	-0.97006	50.02	-0.52	rgb(104,148,237)	1.9915	None
Runx2	Gzmb	0.97006	50.02	0.516	rgb(223,118,120)	1.9915	None
Runx3	Chst12	0.97006	50.02	0.524	rgb(223,117,118)	1.9915	None
Rxra	Ncdn	0.97006	50.02	0.523	rgb(223,117,118)	1.9915	None
Rxra	Trib1	0.97006	50.02	0.52	rgb(223,118,119)	1.9915	None
Scrt1	Cyp2s1	0.97006	50.02	0.522	rgb(223,117,118)	1.9915	2,2
Six5	Slc12a8	0.97006	50.02	0.515	rgb(223,119,120)	1.9915	None
Smad3	Mpzl2	-0.97006	50.02	-0.52	rgb(104,148,237)	1.9915	None
Sp2	Ccdc28b	-0.97006	50.02	-0.52	rgb(103,148,237)	1.9915	None
Sp2	Hist1h1d	-0.97006	50.02	-0.52	rgb(103,148,237)	1.9915	None
Sp2	Mgmt	-0.97006	50.02	-0.52	rgb(104,148,237)	1.9915	None
Sp3	Fth1	-0.97006	50.02	-0.52	rgb(103,148,237)	1.9915	None
Sp4	Cyp2d22	0.97006	50.02	0.517	rgb(223,118,119)	1.9915	None
Sp4	Marcksl1	-0.97006	50.02	-0.52	rgb(104,149,237)	1.9915	None
Spib	Ikbke	0.97006	50.02	0.525	rgb(223,117,118)	1.9915	None
Stat1	Icam1	0.97006	50.02	0.523	rgb(223,117,118)	1.9915	None
Stat4	Uba1	-0.97006	50.02	-0.52	rgb(105,149,237)	1.9915	None
Tbx21	Etv6	0.97006	50.02	0.515	rgb(223,119,120)	1.9915	None
Tcf12	Ier3	-0.97006	50.02	-0.52	rgb(103,148,237)	1.9915	None
Tcf3	Anapc1	0.97006	50.02	0.525	rgb(223,117,118)	1.9915	None
Tcf3	Ppard	0.97006	50.02	0.518	rgb(223,118,119)	1.9915	None
Tcf3	Urb1	0.97006	50.02	0.521	rgb(223,118,119)	1.9915	None
Thra	Plscr3	0.97006	50.02	0.52	rgb(223,118,119)	1.9915	None
Zbtb32	Trpv2	0.97006	50.02	0.523	rgb(223,117,118)	1.9915	2,2
Zbtb7a	Ebag9	-0.97006	50.02	-0.52	rgb(103,148,237)	1.9915	None
Zfp148	Sbf2	0.97006	50.02	0.516	rgb(223,118,119)	1.9915	None
Zfp263	Ankrd55	-0.97006	50.02	-0.52	rgb(104,148,237)	1.9915	None
Zfp277	Zkscan17	0.97006	50.02	0.525	rgb(223,117,118)	1.9915	2,2
Zfp280b	Cxcr6	-0.97006	50.02	-0.52	rgb(105,149,237)	1.9915	2,2
Zfp281	0610007P14Rik	-0.97006	50.02	-0.52	rgb(104,149,237)	1.9915	None
Zfp281	Tab2	-0.97006	50.02	-0.52	rgb(105,149,237)	1.9915	None
Zfp281	Zbtb10	0.97006	50.02	0.524	rgb(223,117,118)	1.9915	None
Zfp35	C2cd4d	-0.97006	50.02	-0.52	rgb(105,149,237)	1.9915	2,2
Zfp367	Cenpm	0.97006	50.02	0.519	rgb(223,118,119)	1.9915	2,2
Zfp467	Flna	-0.97006	50.02	-0.52	rgb(104,148,237)	1.9915	None
Zfp467	Vav3	0.97006	50.02	0.522	rgb(223,117,118)	1.9915	None
Zfp750	Dnm3os	0.97006	50.02	0.518	rgb(223,118,119)	1.9915	2,2
Zfp750	Pvrl4	0.97006	50.02	0.524	rgb(223,117,118)	1.9915	2,2
Zfp808	Rfwd3	0.97006	50.02	0.52	rgb(223,118,119)	1.9915	2,2
Zkscan17	Rabggta	0.97006	50.02	0.52	rgb(223,118,119)	1.9915	2,2
Arnt2	Mllt6	0.96832	50.02	0.519	rgb(223,118,119)	1.9915	None
Ascl2	Zdhhc2	0.96832	50.02	0.522	rgb(223,117,118)	1.9915	2,2
Batf	Dhrs4	-0.96832	50.02	-0.52	rgb(103,148,237)	1.9915	None
Batf	Ebf1	0.96832	50.02	0.524	rgb(223,117,118)	1.9915	None
Batf	Ncoa1	0.96832	50.02	0.525	rgb(223,117,118)	1.9915	None
Batf	Serpinf1	0.96832	50.02	0.524	rgb(223,117,118)	1.9915	None
Bcl11b	Bbc3	-0.96832	50.02	-0.52	rgb(104,148,237)	1.9915	None
Bcl11b	Maml3	0.96832	50.02	0.517	rgb(223,118,119)	1.9915	None
Bcl6	Xcr1	0.96832	50.02	0.521	rgb(223,118,119)	1.9915	None
Cebpb	B230217C12Rik	0.96832	50.02	0.521	rgb(223,118,119)	1.9915	None
E2f1	Cep76	0.96832	50.02	0.517	rgb(223,118,119)	1.9915	None
Ebf1	Heca	0.96832	50.02	0.524	rgb(223,117,118)	1.9915	None
Egr2	Rasgrp1	0.96832	50.02	0.518	rgb(223,118,119)	1.9915	None
Egr3	Adamts6	0.96832	50.02	0.522	rgb(223,117,118)	1.9915	None
Etv6	C2cd2l	-0.96832	50.02	-0.52	rgb(104,148,237)	1.9915	None
Etv6	Pgrmc1	0.96832	50.02	0.518	rgb(223,118,119)	1.9915	None
Fosl2	Acot13	0.96832	50.02	0.517	rgb(223,118,119)	1.9915	None
Gabpa	Slc25a30	-0.96832	50.02	-0.52	rgb(104,148,237)	1.9915	None
Gli3	Rgs16	-0.96832	50.02	-0.52	rgb(104,148,237)	1.9915	2,2
Hhex	Nebl	0.96832	50.02	0.516	rgb(223,118,119)	1.9915	None
Hif1a	Casp6	0.96832	50.02	0.517	rgb(223,118,119)	1.9915	None
Hif1a	Dnajc27	-0.96832	50.02	-0.52	rgb(104,148,237)	1.9915	None
Hif1a	Ndrg2	0.96832	50.02	0.524	rgb(223,117,118)	1.9915	None
Hif1a	Rcor2	0.96832	50.02	0.52	rgb(223,118,119)	1.9915	None
Irf4	2900026A02Rik	-0.96832	50.02	-0.52	rgb(105,149,237)	1.9915	None
Irf4	Cd83	-0.96832	50.02	-0.52	rgb(105,149,237)	1.9915	None
Irf4	Gpm6b	-0.96832	50.02	-0.52	rgb(103,148,237)	1.9915	None
Irf4	Gpr18	0.96832	50.02	0.516	rgb(223,118,119)	1.9915	None
Irf4	Hmgcr	-0.96832	50.02	-0.52	rgb(104,148,237)	1.9915	None
Irf4	Rassf6	-0.96832	50.02	-0.52	rgb(105,149,237)	1.9915	None
Irf4	Sh2b2	-0.96832	50.02	-0.52	rgb(104,148,237)	1.9915	None
Irf4	Tbx21	0.96832	50.02	0.519	rgb(223,118,119)	1.9915	None
Irf4	Trove2	0.96832	50.02	0.516	rgb(223,118,119)	1.9915	None
Klf12	Dcp2	-0.96832	50.02	-0.52	rgb(105,149,237)	1.9915	None
Maf	Cd274	-0.96832	50.02	-0.52	rgb(105,149,237)	1.9915	None
Maf	Glipr1	-0.96832	50.02	-0.52	rgb(103,148,237)	1.9915	None
Mnt	Kdm6b	0.96832	50.02	0.523	rgb(223,117,118)	1.9915	None
Myc	Ccdc126	-0.96832	50.02	-0.52	rgb(103,148,237)	1.9915	None
Myc	Mafg	0.96832	50.02	0.516	rgb(223,119,120)	1.9915	None
Nfic	Ism1	0.96832	50.02	0.52	rgb(223,118,119)	1.9915	None
Nfkb2	Bcl2l1	0.96832	50.02	0.522	rgb(223,117,118)	1.9915	None
Nfkb2	Plod2	0.96832	50.02	0.521	rgb(223,117,119)	1.9915	None
Nr1d1	Marveld1	0.96832	50.02	0.521	rgb(223,117,118)	1.9915	2,2
Nr1d1	Stab1	0.96832	50.02	0.515	rgb(223,119,120)	1.9915	None
Nr2f1	Icam1	-0.96832	50.02	-0.52	rgb(104,148,237)	1.9915	None
Nr3c1	Ccdc148	0.96832	50.02	0.519	rgb(223,118,119)	1.9915	None
Pcgf2	Ltbp4	0.96832	50.02	0.524	rgb(223,117,118)	1.9915	2,2
Plagl2	Abcb1a	0.96832	50.02	0.515	rgb(223,119,120)	1.9915	None
Pou6f1	Mt1	0.96832	50.02	0.52	rgb(223,118,119)	1.9915	2,2
Prox1	Lgr4	0.96832	50.02	0.518	rgb(223,118,119)	1.9915	None
Rarg	Gripap1	0.96832	50.02	0.517	rgb(223,118,119)	1.9915	None
Rela	P4ha2	0.96832	50.02	0.524	rgb(223,117,118)	1.9915	None
Rorc	Il12rb2	-0.96832	50.02	-0.52	rgb(104,148,237)	1.9915	None
Rxra	Bank1	0.96832	50.02	0.516	rgb(223,119,120)	1.9915	None
Sall3	Sell	0.96832	50.02	0.523	rgb(223,117,118)	1.9915	None
Satb1	Fbxo44	0.96832	50.02	0.522	rgb(223,117,118)	1.9915	None
Satb1	Jag2	0.96832	50.02	0.522	rgb(223,117,118)	1.9915	None
Satb1	Kctd17	0.96832	50.02	0.518	rgb(223,118,119)	1.9915	None
Satb1	Map4k5	0.96832	50.02	0.518	rgb(223,118,119)	1.9915	None
Satb1	Nkd2	0.96832	50.02	0.524	rgb(223,117,118)	1.9915	2,2
Satb1	Themis	0.96832	50.02	0.516	rgb(223,118,119)	1.9915	None
Smad3	Akap12	0.96832	50.02	0.523	rgb(223,117,118)	1.9915	2,2
Smad3	Pmepa1	0.96832	50.02	0.52	rgb(223,118,119)	1.9915	None
Smad3	Stat5b	0.96832	50.02	0.522	rgb(223,117,118)	1.9915	None
Sp4	Cdkn2d	-0.96832	50.02	-0.52	rgb(104,148,237)	1.9915	None
Sp4	Mxd3	-0.96832	50.02	-0.52	rgb(103,148,237)	1.9915	None
Sp4	Rasgrp2	-0.96832	50.02	-0.52	rgb(104,148,237)	1.9915	None
Srebf1	4932438H23Rik	0.96832	50.02	0.525	rgb(223,117,118)	1.9915	None
Stat1	Gpr15	0.96832	50.02	0.518	rgb(223,118,119)	1.9915	None
Stat3	Gja1	0.96832	50.02	0.516	rgb(223,118,120)	1.9915	None
Stat3	Il10	0.96832	50.02	0.52	rgb(223,118,119)	1.9915	None
Stat3	Klf3	-0.96832	50.02	-0.52	rgb(104,148,237)	1.9915	None
Tef	Galnt3	0.96832	50.02	0.518	rgb(223,118,119)	1.9915	None
Tef	Ncoa1	0.96832	50.02	0.52	rgb(223,118,119)	1.9915	None
Twist1	Trim67	0.96832	50.02	0.517	rgb(223,118,119)	1.9915	2,2
Vax2	Cdc14a	0.96832	50.02	0.515	rgb(223,119,120)	1.9915	None
Xbp1	Psd	0.96832	50.02	0.52	rgb(223,118,119)	1.9915	None
Zbtb1	Mab21l2	-0.96832	50.02	-0.52	rgb(103,148,237)	1.9915	2,2
Zbtb17	Cln5	-0.96832	50.02	-0.52	rgb(105,149,237)	1.9915	2,2
Zbtb7b	Rps6ka3	0.96832	50.02	0.517	rgb(223,118,119)	1.9915	None
Zfp277	Cmtm7	0.96832	50.02	0.525	rgb(223,117,118)	1.9915	2,2
Zfp277	Fam120c	-0.96832	50.02	-0.53	rgb(101,147,237)	1.9915	2,2
Zfp385a	Slc19a2	0.96832	50.02	0.524	rgb(223,117,118)	1.9915	2,2
Zfp429	Slc2a3	-0.96832	50.02	-0.52	rgb(103,148,237)	1.9915	2,2
Zfp536	Rpl10a	0.96832	50.02	0.524	rgb(223,117,118)	1.9915	2,2
Zfp618	Tlk1	0.96832	50.02	0.517	rgb(223,118,119)	1.9915	2,2
Zfp667	Vps37d	0.96832	50.02	0.516	rgb(223,118,119)	1.9915	2,2
Zfp750	Ccdc159	0.96832	50.02	0.522	rgb(223,117,118)	1.9915	2,2
Zfp758	Ifitm3	-0.96832	50.02	-0.52	rgb(104,148,237)	1.9915	2,2
Zfp771	Cebpb	0.96832	50.02	0.515	rgb(223,119,120)	1.9915	2,2
Zfp827	Slc22a2	0.96832	50.02	0.522	rgb(223,117,118)	1.9915	2,2
Zfp956	Bambi	0.96832	50.02	0.515	rgb(223,119,120)	1.9915	2,2
Zhx3	Syne1	0.96832	50.02	0.52	rgb(223,118,119)	1.9915	2,2
Ascl2	Dip2b	0.96667	50.01	0.508	rgb(223,120,121)	1.9913	None
Atf3	Zfp362	0.96667	50.01	0.514	rgb(223,119,120)	1.9913	None
Atf6	Krtcap2	0.96667	50.01	0.506	rgb(223,120,121)	1.9913	2,2
Batf	Gja1	-0.96667	50.01	-0.51	rgb(106,149,237)	1.9913	None
Bcl11b	Dpf1	0.96667	50.01	0.512	rgb(223,119,120)	1.9913	None
Bcl11b	Rab39b	0.96667	50.01	0.507	rgb(223,120,121)	1.9913	None
Bcl6	Gngt2	0.96667	50.01	0.513	rgb(223,119,120)	1.9913	None
Bhlhe41	Grhl2	-0.96667	50.01	-0.51	rgb(106,149,237)	1.9913	2,2
Cenpt	Ramp3	0.96667	50.01	0.511	rgb(223,119,120)	1.9913	2,2
E2f1	Fancm	0.96667	50.01	0.508	rgb(223,120,121)	1.9913	None
Ebf1	Ncdn	0.96667	50.01	0.511	rgb(223,119,120)	1.9913	None
Egr2	Zkscan17	0.96667	50.01	0.507	rgb(223,120,121)	1.9913	None
Erg	Ahrr	-0.96667	50.01	-0.51	rgb(107,150,236)	1.9913	None
Ets1	AI506816	0.96667	50.01	0.506	rgb(223,120,121)	1.9913	None
Fosl2	4930539E08Rik	0.96667	50.01	0.507	rgb(223,120,121)	1.9913	2,2
Fosl2	Cpne6	0.96667	50.01	0.51	rgb(223,120,121)	1.9913	None
Fosl2	Cxcr1	0.96667	50.01	0.512	rgb(223,119,120)	1.9913	None
Fosl2	Fam183b	0.96667	50.01	0.506	rgb(223,120,121)	1.9913	None
Fosl2	Npas4	-0.96667	50.01	-0.51	rgb(105,149,237)	1.9913	None
Fosl2	Pgf	0.96667	50.01	0.506	rgb(223,120,121)	1.9913	None
Gabpa	Flot2	-0.96667	50.01	-0.51	rgb(105,149,237)	1.9913	None
Gata1	Endou	0.96667	50.01	0.506	rgb(223,120,121)	1.9913	2,2
Hif1a	Ankzf1	0.96667	50.01	0.508	rgb(223,120,121)	1.9913	None
Hif1a	Ppp1r13l	0.96667	50.01	0.513	rgb(223,119,120)	1.9913	None
Hif1a	Selenbp1	0.96667	50.01	0.511	rgb(223,119,120)	1.9913	None
Hif1a	Serpine1	0.96667	50.01	0.506	rgb(223,120,121)	1.9913	None
Hif1a	Serpinf1	0.96667	50.01	0.511	rgb(223,119,120)	1.9913	None
Hmg20b	Zfp629	-0.96667	50.01	-0.51	rgb(105,149,237)	1.9913	2,2
Hmx3	Alpk2	0.96667	50.01	0.509	rgb(223,120,121)	1.9913	None
Ikzf3	Appl2	0.96667	50.01	0.51	rgb(223,120,121)	1.9913	None
Ikzf3	Rcl1	-0.96667	50.01	-0.51	rgb(106,149,236)	1.9913	None
Ikzf3	Sdcbp2	0.96667	50.01	0.508	rgb(223,120,121)	1.9913	None
Irf4	Csnk1e	0.96667	50.01	0.506	rgb(223,120,121)	1.9913	None
Irf4	Idi2	-0.96667	50.01	-0.51	rgb(107,150,236)	1.9913	None
Irf4	Mafg	0.96667	50.01	0.511	rgb(223,119,120)	1.9913	None
Irf4	Ptpre	-0.96667	50.01	-0.51	rgb(106,150,236)	1.9913	None
Irf4	Tmem184b	0.96667	50.01	0.513	rgb(223,119,120)	1.9913	None
Irf4	Tns1	-0.96667	50.01	-0.51	rgb(107,150,236)	1.9913	None
Maf	Dmxl2	-0.96667	50.01	-0.51	rgb(107,150,236)	1.9913	None
Maf	Hvcn1	-0.96667	50.01	-0.51	rgb(106,149,236)	1.9913	None
Mbnl2	1110057K04Rik	-0.96667	50.01	-0.51	rgb(106,150,236)	1.9913	2,2
Mef2d	Mapkapk2	-0.96667	50.01	-0.51	rgb(107,150,236)	1.9913	None
Mxd1	Igfbp4	0.96667	50.01	0.51	rgb(223,120,121)	1.9913	2,2
Nfat5	Arrb1	0.96667	50.01	0.511	rgb(223,119,120)	1.9913	None
Nfe2l2	Gart	0.96667	50.01	0.508	rgb(223,120,121)	1.9913	None
Nr1d1	Dab2	0.96667	50.01	0.513	rgb(223,119,120)	1.9913	None
Nr1d1	Glis1	0.96667	50.01	0.505	rgb(223,121,122)	1.9913	None
Phf20	Dixdc1	0.96667	50.01	0.513	rgb(223,119,120)	1.9913	2,2
Rorc	2310007L24Rik	0.96667	50.01	0.508	rgb(223,120,121)	1.9913	2,2
Rorc	S100a4	0.96667	50.01	0.511	rgb(223,119,120)	1.9913	None
Runx1	2900011O08Rik	0.96667	50.01	0.506	rgb(223,120,121)	1.9913	None
Rxra	Hrc	0.96667	50.01	0.509	rgb(223,120,121)	1.9913	None
Satb1	Acot12	-0.96667	50.01	-0.51	rgb(106,150,236)	1.9913	None
Satb1	Apbb1ip	-0.96667	50.01	-0.51	rgb(106,149,236)	1.9913	None
Satb1	Dnmt3a	0.96667	50.01	0.511	rgb(223,119,120)	1.9913	None
Satb1	Malt1	0.96667	50.01	0.515	rgb(223,119,120)	1.9913	None
Satb1	Olfm2	-0.96667	50.01	-0.51	rgb(106,149,236)	1.9913	None
Sgsm2	Calcrl	-0.96667	50.01	-0.51	rgb(107,150,236)	1.9913	2,2
Sgsm2	Epas1	-0.96667	50.01	-0.51	rgb(107,150,236)	1.9913	2,2
Smad3	Nynrin	0.96667	50.01	0.506	rgb(223,120,121)	1.9913	2,2
Smad3	Olfm2	0.96667	50.01	0.51	rgb(223,120,121)	1.9913	None
Smad3	Rnf149	0.96667	50.01	0.507	rgb(223,120,121)	1.9913	None
Smad4	Lamc3	0.96667	50.01	0.509	rgb(223,120,121)	1.9913	2,2
Sox5	Cacna2d1	0.96667	50.01	0.513	rgb(223,119,120)	1.9913	None
Sp4	Cbx4	-0.96667	50.01	-0.51	rgb(106,150,236)	1.9913	None
Sp4	Ets1	-0.96667	50.01	-0.51	rgb(106,149,237)	1.9913	None
Srebf1	Fyn	-0.96667	50.01	-0.51	rgb(106,150,236)	1.9913	None
Srebf1	Syne1	0.96667	50.01	0.514	rgb(223,119,120)	1.9913	None
Stat3	Cwh43	0.96667	50.01	0.51	rgb(223,120,121)	1.9913	None
Stat3	Gngt2	0.96667	50.01	0.505	rgb(223,120,121)	1.9913	None
Stat3	Nkain1	0.96667	50.01	0.507	rgb(223,120,121)	1.9913	None
Stat3	Rora	0.96667	50.01	0.51	rgb(223,120,121)	1.9913	None
Stat3	Stx7	0.96667	50.01	0.509	rgb(223,120,121)	1.9913	None
Tbx21	4930417O13Rik	0.96667	50.01	0.515	rgb(223,119,120)	1.9913	None
Tet2	Rtn4	-0.96667	50.01	-0.51	rgb(106,149,236)	1.9913	2,2
Thrb	Pfkp	-0.96667	50.01	-0.51	rgb(106,150,236)	1.9913	None
Trerf1	Gfod1	0.96667	50.01	0.506	rgb(223,120,121)	1.9913	None
Trp53	Acad8	0.96667	50.01	0.506	rgb(223,120,121)	1.9913	None
Zbed3	Zkscan17	0.96667	50.01	0.511	rgb(223,119,120)	1.9913	2,2
Zbtb33	Tmem141	-0.96667	50.01	-0.51	rgb(106,149,236)	1.9913	2,2
Zbtb4	Fam19a3	0.96667	50.01	0.51	rgb(223,120,121)	1.9913	None
Zbtb7a	Chd7	0.96667	50.01	0.506	rgb(223,120,121)	1.9913	None
Zbtb7b	Hk1	0.96667	50.01	0.51	rgb(223,120,121)	1.9913	None
Zbtb7b	Pacs1	0.96667	50.01	0.51	rgb(223,120,121)	1.9913	None
Zfp105	Apbb1ip	0.96667	50.01	0.507	rgb(223,120,121)	1.9913	None
Zfp105	Itpr3	-0.96667	50.01	-0.51	rgb(107,150,236)	1.9913	2,2
Zfp219	Tacc1	0.96667	50.01	0.515	rgb(223,119,120)	1.9913	None
Zfp429	Fbxo44	0.96667	50.01	0.515	rgb(223,119,120)	1.9913	2,2
Zfp84	Zmynd10	0.96667	50.01	0.512	rgb(223,119,120)	1.9913	2,2
Ahctf1	Nln	0.96428	50.01	0.51	rgb(223,120,121)	1.9913	None
Ankzf1	Pdia2	0.96428	50.01	0.513	rgb(223,119,120)	1.9913	2,2
Bach1	Cd7	0.96428	50.01	0.514	rgb(223,119,120)	1.9913	None
Batf	Col18a1	0.96428	50.01	0.508	rgb(223,120,121)	1.9913	None
Batf3	Runx1	-0.96428	50.01	-0.51	rgb(107,150,236)	1.9913	None
Bcl6	Wipf1	-0.96428	50.01	-0.51	rgb(106,149,236)	1.9913	None
Bhlhe40	Capn2	0.96428	50.01	0.513	rgb(223,119,120)	1.9913	None
Bhlhe40	Dock11	0.96428	50.01	0.514	rgb(223,119,120)	1.9913	None
Bhlhe40	Rcsd1	0.96428	50.01	0.514	rgb(223,119,120)	1.9913	None
Bhlhe40	Trpc1	0.96428	50.01	0.512	rgb(223,119,120)	1.9913	None
Bhlhe40	Unc13a	0.96428	50.01	0.51	rgb(223,120,121)	1.9913	None
C030039L03Rik	Nphp3	0.96428	50.01	0.515	rgb(223,119,120)	1.9913	2,2
Cebpg	Slc6a9	0.96428	50.01	0.512	rgb(223,119,120)	1.9913	2,2
E2f1	Dtl	0.96428	50.01	0.514	rgb(223,119,120)	1.9913	None
E2f1	Glipr1	-0.96428	50.01	-0.51	rgb(106,150,236)	1.9913	None
Ebf1	Gatsl2	0.96428	50.01	0.508	rgb(223,120,121)	1.9913	None
Egr1	Arfgap3	-0.96428	50.01	-0.51	rgb(107,150,236)	1.9913	None
Egr1	Zfp36l1	0.96428	50.01	0.512	rgb(223,119,120)	1.9913	None
Elf1	Commd9	-0.96428	50.01	-0.51	rgb(107,150,236)	1.9913	None
Elf1	Itga4	0.96428	50.01	0.51	rgb(223,120,121)	1.9913	None
Elf1	Kdm2b	0.96428	50.01	0.507	rgb(223,120,121)	1.9913	None
Elf1	Ripk2	0.96428	50.01	0.514	rgb(223,119,120)	1.9913	None
Elf1	Znhit6	-0.96428	50.01	-0.51	rgb(106,150,236)	1.9913	None
Esrra	Aen	0.96428	50.01	0.513	rgb(223,119,120)	1.9913	None
Ets1	Acp5	0.96428	50.01	0.508	rgb(223,120,121)	1.9913	None
Ets1	Aste1	-0.96428	50.01	-0.51	rgb(107,150,236)	1.9913	None
Ets1	Plcg1	0.96428	50.01	0.507	rgb(223,120,121)	1.9913	None
Ets1	Tex2	0.96428	50.01	0.512	rgb(223,119,120)	1.9913	None
Etv4	Asns	0.96428	50.01	0.51	rgb(223,120,121)	1.9913	2,2
Etv6	Il2rb	0.96428	50.01	0.514	rgb(223,119,120)	1.9913	None
Etv6	Tnnt2	-0.96428	50.01	-0.51	rgb(106,150,236)	1.9913	2,2
Fosl1	Reep6	0.96428	50.01	0.509	rgb(223,120,121)	1.9913	None
Fosl2	Bcl2l1	-0.96428	50.01	-0.51	rgb(106,150,236)	1.9913	None
Fosl2	Cecr6	-0.96428	50.01	-0.51	rgb(106,150,236)	1.9913	None
Fosl2	Stat3	0.96428	50.01	0.511	rgb(223,119,120)	1.9913	None
Foxf2	Ndrg4	0.96428	50.01	0.507	rgb(223,120,121)	1.9913	None
Foxf2	Nqo2	0.96428	50.01	0.509	rgb(223,120,121)	1.9913	2,2
Foxf2	Nucb2	0.96428	50.01	0.511	rgb(223,119,120)	1.9913	2,2
Foxo1	Ust	0.96428	50.01	0.515	rgb(223,119,120)	1.9913	None
Foxo3	Exosc8	-0.96428	50.01	-0.51	rgb(107,150,236)	1.9913	None
Foxp1	Muc13	-0.96428	50.01	-0.51	rgb(107,150,236)	1.9913	2,2
Foxs1	Hvcn1	0.96428	50.01	0.51	rgb(223,120,121)	1.9913	2,2
Gabpa	Ube2v1	0.96428	50.01	0.512	rgb(223,119,120)	1.9913	None
Gli3	Nhs	0.96428	50.01	0.513	rgb(223,119,120)	1.9913	2,2
Glis2	Cercam	0.96428	50.01	0.506	rgb(223,120,121)	1.9913	2,2
Hes6	Galk1	0.96428	50.01	0.509	rgb(223,120,121)	1.9913	2,2
Hif1a	E330009J07Rik	0.96428	50.01	0.508	rgb(223,120,121)	1.9913	None
Hif1a	Sco1	0.96428	50.01	0.508	rgb(223,120,121)	1.9913	None
Hif3a	Rasl12	0.96428	50.01	0.511	rgb(223,119,120)	1.9913	2,2
Hif3a	Stc1	0.96428	50.01	0.507	rgb(223,120,121)	1.9913	2,2
Hlx	Sdc1	0.96428	50.01	0.506	rgb(223,120,121)	1.9913	2,2
Hsf1	Crip1	-0.96428	50.01	-0.51	rgb(107,150,236)	1.9913	None
Hsf4	Zfp536	0.96428	50.01	0.512	rgb(223,119,120)	1.9913	None
Ikzf3	Klf4	-0.96428	50.01	-0.51	rgb(107,150,236)	1.9913	None
Ikzf3	Pcsk1	-0.96428	50.01	-0.51	rgb(107,150,236)	1.9913	2,2
Insm1	Spin4	-0.96428	50.01	-0.51	rgb(105,149,237)	1.9913	2,2
Irf1	Tmem35	0.96428	50.01	0.507	rgb(223,120,121)	1.9913	None
Irf2	Gimap7	0.96428	50.01	0.506	rgb(223,120,121)	1.9913	None
Irf2	Slc26a10	0.96428	50.01	0.514	rgb(223,119,120)	1.9913	None
Irf4	Csf2	-0.96428	50.01	-0.51	rgb(107,150,236)	1.9913	None
Irf4	Skil	0.96428	50.01	0.51	rgb(223,120,121)	1.9913	None
Irf5	Pde7a	0.96428	50.01	0.508	rgb(223,120,121)	1.9913	None
Irf7	Oas1c	0.96428	50.01	0.507	rgb(223,120,121)	1.9913	None
Jun	Serinc5	0.96428	50.01	0.506	rgb(223,120,121)	1.9913	None
Jun	Src	0.96428	50.01	0.509	rgb(223,120,121)	1.9913	None
Klf13	Helb	0.96428	50.01	0.513	rgb(223,119,120)	1.9913	None
Klf13	Rasgrp2	0.96428	50.01	0.51	rgb(223,120,121)	1.9913	None
Klf3	Mgll	-0.96428	50.01	-0.51	rgb(105,149,237)	1.9913	None
Klf8	Kcnk7	0.96428	50.01	0.514	rgb(223,119,120)	1.9913	None
Lef1	Sgsm2	-0.96428	50.01	-0.51	rgb(106,149,236)	1.9913	None
Lef1	Tsen2	-0.96428	50.01	-0.51	rgb(106,150,236)	1.9913	None
Litaf	Chn2	0.96428	50.01	0.513	rgb(223,119,120)	1.9913	2,2
Mxd3	Arhgap33	0.96428	50.01	0.51	rgb(223,120,121)	1.9913	2,2
Mxi1	Acp5	0.96428	50.01	0.51	rgb(223,120,121)	1.9913	None
Mxi1	Kif3a	0.96428	50.01	0.509	rgb(223,120,121)	1.9913	None
Mxi1	Utp20	-0.96428	50.01	-0.51	rgb(106,149,237)	1.9913	None
Mybl1	Pde2a	-0.96428	50.01	-0.51	rgb(107,150,236)	1.9913	None
Ncoa2	Tcf12	0.96428	50.01	0.505	rgb(223,120,121)	1.9913	2,2
Nfil3	Auh	0.96428	50.01	0.51	rgb(223,120,121)	1.9913	2,2
Nr2f6	Naglu	0.96428	50.01	0.509	rgb(223,120,121)	1.9913	2,2
Nr3c1	Fam46c	0.96428	50.01	0.509	rgb(223,120,121)	1.9913	None
Nr4a2	Fosl2	0.96428	50.01	0.512	rgb(223,119,120)	1.9913	2,2
Nr4a2	Gpr65	0.96428	50.01	0.511	rgb(223,119,120)	1.9913	None
Pou2f2	Iqgap2	-0.96428	50.01	-0.51	rgb(105,149,237)	1.9913	None
Prdm16	Fam71f2	0.96428	50.01	0.511	rgb(223,119,121)	1.9913	None
Rarg	Rftn2	0.96428	50.01	0.513	rgb(223,119,120)	1.9913	None
Rbpj	Nfil3	0.96428	50.01	0.51	rgb(223,120,121)	1.9913	2,2
Rest	Ccdc122	0.96428	50.01	0.511	rgb(223,119,120)	1.9913	None
Rest	Dhcr7	-0.96428	50.01	-0.51	rgb(107,150,236)	1.9913	None
Rorc	Il1r1	0.96428	50.01	0.507	rgb(223,120,121)	1.9913	None
Runx1	Enthd1	-0.96428	50.01	-0.51	rgb(106,150,236)	1.9913	None
Rxra	Fas	-0.96428	50.01	-0.51	rgb(106,149,236)	1.9913	None
Rxra	Mboat7	0.96428	50.01	0.507	rgb(223,120,121)	1.9913	None
Rxra	Slamf6	0.96428	50.01	0.513	rgb(223,119,120)	1.9913	None
Scrt1	L1cam	0.96428	50.01	0.51	rgb(223,120,121)	1.9913	2,2
Six5	Skil	-0.96428	50.01	-0.51	rgb(107,150,236)	1.9913	None
Sox5	Timp1	0.96428	50.01	0.507	rgb(223,120,121)	1.9913	2,2
Sp110	Eef1a1	-0.96428	50.01	-0.51	rgb(107,150,236)	1.9913	None
Sp2	Ckmt1	-0.96428	50.01	-0.51	rgb(105,149,237)	1.9913	None
Srebf1	Itgb7	0.96428	50.01	0.507	rgb(223,120,121)	1.9913	None
Srebf1	Trerf1	0.96428	50.01	0.515	rgb(223,119,120)	1.9913	None
Srf	Bcor	0.96428	50.01	0.514	rgb(223,119,120)	1.9913	None
Srf	Dnajc16	0.96428	50.01	0.505	rgb(223,121,122)	1.9913	None
Stat4	Psme2	0.96428	50.01	0.511	rgb(223,119,120)	1.9913	None
Tcf3	Acvr1b	0.96428	50.01	0.514	rgb(223,119,120)	1.9913	None
Tead1	Fmnl2	0.96428	50.01	0.505	rgb(223,121,122)	1.9913	None
Tead1	Hmgcr	0.96428	50.01	0.511	rgb(223,119,120)	1.9913	None
Tfdp2	9230114K14Rik	0.96428	50.01	0.507	rgb(223,120,121)	1.9913	None
Twist1	Glt28d2	0.96428	50.01	0.509	rgb(223,120,121)	1.9913	2,2
Vax2	Adcy4	0.96428	50.01	0.507	rgb(223,120,121)	1.9913	2,2
Vax2	Cysltr1	0.96428	50.01	0.514	rgb(223,119,120)	1.9913	2,2
Vax2	Dab2	0.96428	50.01	0.506	rgb(223,120,121)	1.9913	2,2
Vax2	Pde6d	0.96428	50.01	0.508	rgb(223,120,121)	1.9913	2,2
Vdr	Fbxl21	0.96428	50.01	0.511	rgb(223,119,120)	1.9913	None
Yy2	Exoc6	-0.96428	50.01	-0.51	rgb(105,149,237)	1.9913	None
Zbtb7a	Nsun6	-0.96428	50.01	-0.51	rgb(107,150,236)	1.9913	None
Zbtb7b	Pbx2	0.96428	50.01	0.511	rgb(223,119,120)	1.9913	None
Zfp148	Ivd	-0.96428	50.01	-0.51	rgb(107,150,236)	1.9913	None
Zfp263	Vim	-0.96428	50.01	-0.51	rgb(106,149,237)	1.9913	None
Zfp281	Bcl2l11	0.96428	50.01	0.506	rgb(223,120,121)	1.9913	None
Zfp35	Dusp12	0.96428	50.01	0.508	rgb(223,120,121)	1.9913	2,2
Zfp365	Tnfsf4	0.96428	50.01	0.505	rgb(223,120,121)	1.9913	2,2
Zfp367	Apitd1	0.96428	50.01	0.507	rgb(223,120,121)	1.9913	2,2
Zfp385a	Lrrc28	0.96428	50.01	0.508	rgb(223,120,121)	1.9913	2,2
Zfp516	Naga	0.96428	50.01	0.511	rgb(223,119,121)	1.9913	2,2
Zfp869	Dock7	-0.96428	50.01	-0.51	rgb(106,150,236)	1.9913	2,2
Zfp91	Ascc1	-0.96428	50.01	-0.51	rgb(107,150,236)	1.9913	2,2
Zfp961	Smpd4	0.96428	50.01	0.515	rgb(223,119,120)	1.9913	2,2
Ahctf1	Yif1b	-0.96233	50	-0.5	rgb(110,152,236)	1.9911	None
Ar	Jazf1	0.96233	50	0.503	rgb(223,121,122)	1.9911	None
Arid3a	Akap2	-0.96233	50	-0.5	rgb(109,151,236)	1.9911	None
Arid3a	Ctss	-0.96233	50	-0.5	rgb(108,151,236)	1.9911	None
Arid3a	Tmem38b	-0.96233	50	-0.5	rgb(109,151,236)	1.9911	None
Atf3	Tes	0.96233	50	0.499	rgb(222,122,123)	1.9911	None
Atf5	Slc3a2	0.96233	50	0.497	rgb(222,122,123)	1.9911	None
Batf	Trim36	0.96233	50	0.497	rgb(222,122,123)	1.9911	None
Bcl11b	5730508B09Rik	0.96233	50	0.496	rgb(222,122,123)	1.9911	None
Bhlhe40	Exoc6	0.96233	50	0.501	rgb(223,121,122)	1.9911	None
Cebpb	C3	0.96233	50	0.495	rgb(222,122,123)	1.9911	None
Creb3l2	Fosl2	0.96233	50	0.495	rgb(222,122,123)	1.9911	2,2
Crem	Apol9b	-0.96233	50	-0.5	rgb(108,151,236)	1.9911	None
E2f1	Anln	0.96233	50	0.502	rgb(223,121,122)	1.9911	None
E2f1	Sdr39u1	0.96233	50	0.504	rgb(223,121,122)	1.9911	None
E2f4	Reps1	0.96233	50	0.502	rgb(223,121,122)	1.9911	None
Egr2	Dusp1	-0.96233	50	-0.5	rgb(109,152,236)	1.9911	None
Egr2	Prrg4	-0.96233	50	-0.5	rgb(108,151,236)	1.9911	None
Egr2	Tnf	0.96233	50	0.498	rgb(222,122,123)	1.9911	None
Egr2	Zdhhc2	-0.96233	50	-0.5	rgb(108,151,236)	1.9911	None
Egr3	Surf4	-0.96233	50	-0.5	rgb(110,152,236)	1.9911	None
Elf1	Dars2	0.96233	50	0.5	rgb(222,122,123)	1.9911	None
Elf1	Rnf125	0.96233	50	0.498	rgb(222,122,123)	1.9911	None
Elf1	Synj1	0.96233	50	0.498	rgb(222,122,123)	1.9911	None
Elk3	Dusp14	0.96233	50	0.501	rgb(223,121,122)	1.9911	2,2
Ets2	Mpzl2	-0.96233	50	-0.5	rgb(107,150,236)	1.9911	None
Etv6	Fam69b	0.96233	50	0.499	rgb(222,122,123)	1.9911	None
Etv6	Gbp2	0.96233	50	0.496	rgb(222,122,123)	1.9911	None
Etv6	Tbx21	0.96233	50	0.502	rgb(223,121,122)	1.9911	None
Fosl2	Adora2a	0.96233	50	0.497	rgb(222,122,123)	1.9911	None
Fosl2	C920009B18Rik	0.96233	50	0.504	rgb(223,121,122)	1.9911	None
Fosl2	Lbp	0.96233	50	0.497	rgb(222,122,123)	1.9911	None
Fosl2	Rora	0.96233	50	0.498	rgb(222,122,123)	1.9911	None
Foxo1	Bloc1s2	-0.96233	50	-0.5	rgb(108,151,236)	1.9911	None
Foxs1	F730043M19Rik	0.96233	50	0.498	rgb(222,122,123)	1.9911	None
Gata1	Gpm6b	0.96233	50	0.5	rgb(223,121,122)	1.9911	None
Gata3	Ipmk	-0.96233	50	-0.5	rgb(108,150,236)	1.9911	None
Hbp1	Camk2n1	0.96233	50	0.501	rgb(223,121,122)	1.9911	None
Hic1	Zbtb10	-0.96233	50	-0.5	rgb(108,151,236)	1.9911	2,2
Hif1a	Ncs1	0.96233	50	0.502	rgb(223,121,122)	1.9911	None
Hif3a	Pygl	0.96233	50	0.496	rgb(222,122,123)	1.9911	2,2
Hsf1	Gimap7	-0.96233	50	-0.5	rgb(108,151,236)	1.9911	None
Hsf4	Epas1	0.96233	50	0.501	rgb(223,121,122)	1.9911	None
Irf1	Ctss	0.96233	50	0.504	rgb(223,121,122)	1.9911	None
Irf4	Tmem19	0.96233	50	0.497	rgb(222,122,123)	1.9911	None
Irf4	Xcr1	-0.96233	50	-0.5	rgb(109,151,236)	1.9911	None
Irf5	Trim14	0.96233	50	0.496	rgb(222,122,123)	1.9911	None
Irf5	Zfp36l2	-0.96233	50	-0.5	rgb(109,152,236)	1.9911	None
Irf7	Il6	0.96233	50	0.5	rgb(223,121,122)	1.9911	2,2
Irf9	Stat2	0.96233	50	0.496	rgb(222,122,123)	1.9911	None
Kdm2b	Bend3	0.96233	50	0.499	rgb(222,122,123)	1.9911	2,2
Klf13	Prr7	0.96233	50	0.499	rgb(222,122,123)	1.9911	2,2
Lin54	Dclre1a	0.96233	50	0.505	rgb(223,121,122)	1.9911	None
Maf	Gbp9	-0.96233	50	-0.5	rgb(108,151,236)	1.9911	None
Maf	Pld2	0.96233	50	0.502	rgb(223,121,122)	1.9911	None
Maf	Plekho1	0.96233	50	0.5	rgb(222,122,123)	1.9911	None
Maff	Map3k5	-0.96233	50	-0.5	rgb(109,151,236)	1.9911	None
Msc	Lgals3	0.96233	50	0.5	rgb(222,122,123)	1.9911	None
Msc	Pms1	-0.96233	50	-0.5	rgb(109,152,236)	1.9911	None
Mxi1	Mapre3	0.96233	50	0.499	rgb(222,122,123)	1.9911	None
Mybl1	Anln	0.96233	50	0.501	rgb(223,121,122)	1.9911	None
Nfatc2	Actn1	-0.96233	50	-0.5	rgb(108,151,236)	1.9911	None
Nfatc4	Acvr1b	0.96233	50	0.497	rgb(222,122,123)	1.9911	None
Nfkb2	Trib2	-0.96233	50	-0.5	rgb(110,152,236)	1.9911	None
Pknox1	Got1	-0.96233	50	-0.5	rgb(108,151,236)	1.9911	2,2
Pou2af1	Crtam	0.96233	50	0.504	rgb(223,121,122)	1.9911	2,2
Pou2f2	Klri2	-0.96233	50	-0.5	rgb(109,151,236)	1.9911	None
Pou2f2	Rdh11	-0.96233	50	-0.5	rgb(109,152,236)	1.9911	None
Prdm2	Gstt1	-0.96233	50	-0.5	rgb(108,151,236)	1.9911	2,2
Rfx3	Rcl1	-0.96233	50	-0.5	rgb(108,151,236)	1.9911	None
Runx3	Pdcd1	-0.96233	50	-0.5	rgb(109,151,236)	1.9911	None
Scrt1	Rassf1	0.96233	50	0.503	rgb(223,121,122)	1.9911	None
Smad3	Cyr61	-0.96233	50	-0.5	rgb(109,151,236)	1.9911	None
Smad3	Dapl1	-0.96233	50	-0.5	rgb(110,152,236)	1.9911	None
Sox4	Ankrd39	0.96233	50	0.498	rgb(222,122,123)	1.9911	None
Sp2	BC026585	-0.96233	50	-0.5	rgb(109,152,236)	1.9911	None
Sp2	Zfp609	0.96233	50	0.501	rgb(223,121,122)	1.9911	None
Sp3	Sepw1	-0.96233	50	-0.5	rgb(109,151,236)	1.9911	None
Sp4	H2afx	-0.96233	50	-0.5	rgb(108,151,236)	1.9911	None
Sp4	Ms4a4b	0.96233	50	0.496	rgb(222,122,123)	1.9911	None
Stat2	Dtx3l	0.96233	50	0.502	rgb(223,121,122)	1.9911	None
Stat4	Nsun6	0.96233	50	0.504	rgb(223,121,122)	1.9911	None
[truncated: 51,346 more rows]

## Sheet: ATAC_Th17_bias50_maxComb_cut01_
TF	Target	SignedQuantile	AveStability	AvePCorr	stroke	stroke-width	stroke-dasharray
Hif1a	Egln1	0.99996	50.4	0.897	rgb(227, 46, 48)	1.9998	None
Tbx21	Tbkbp1	0.99996	50.41	0.914	rgb(227, 42, 44)	2	2,2
Hif1a	Pgm2	0.99993	50.38	0.881	rgb(227, 49, 50)	1.9994	None
Irf7	Rtp4	0.99993	50.39	0.889	rgb(227, 47, 49)	1.9996	2,2
Hif1a	Ero1l	0.99989	50.35	0.845	rgb(226, 56, 57)	1.9988	None
Irf7	Rsad2	0.99989	50.37	0.865	rgb(227, 52, 53)	1.9992	None
E2f4	Mxd3	0.99985	50.33	0.828	rgb(226, 59, 61)	1.9984	None
Irf1	Nlrc5	0.99985	50.36	0.857	rgb(226, 53, 55)	1.999	None
Hif1a	Bnip3	0.99981	50.32	0.82	rgb(226, 60, 62)	1.9982	None
Sp2	Brd3	0.99981	50.35	0.847	rgb(226, 55, 57)	1.9988	None
Irf1	Tbx21	0.9998	50.33	0.825	rgb(226, 59, 61)	1.9984	2,2
Hif1a	Ppme1	0.99976	50.31	0.812	rgb(226, 62, 64)	1.998	None
Hif1a	Slc2a1	0.99976	50.31	0.808	rgb(226, 63, 64)	1.998	2,2
Mxi1	Cxcr4	0.99972	50.32	0.821	rgb(226, 60, 62)	1.9982	None
Srebf2	Dhcr24	0.99972	50.32	0.822	rgb(226, 60, 62)	1.9982	2,2
Hif1a	2310022B05Rik	0.99968	50.29	0.79	rgb(226, 66, 68)	1.9976	2,2
Hif1a	Jmjd6	0.99968	50.29	0.79	rgb(226, 66, 68)	1.9976	None
Crem	Vps37b	0.99959	50.31	0.809	rgb(226, 62, 64)	1.998	None
Hif1a	1190002N15Rik	0.99959	50.27	0.774	rgb(226, 69, 71)	1.9972	None
Hif1a	Aldoa	0.99959	50.27	0.773	rgb(225, 69, 71)	1.9972	2,2
Irf7	Xaf1	0.99959	50.31	0.814	rgb(226, 61, 63)	1.998	None
Irf9	Irf7	0.99959	50.31	0.813	rgb(226, 62, 63)	1.998	2,2
Ahctf1	Zcchc2	0.99952	50.3	0.8	rgb(226, 64, 66)	1.9978	None
Rorc	Lingo4	0.99952	50.3	0.8	rgb(226, 64, 66)	1.9978	2,2
Srebf1	Fads2	0.99952	50.3	0.798	rgb(226, 65, 66)	1.9978	2,2
Srf	Adarb1	0.99952	50.3	0.799	rgb(226, 64, 66)	1.9978	None
Etv6	Rpp14	0.99942	50.26	0.759	rgb(225, 72, 74)	1.997	None
Hif1a	3110057O12Rik	0.99942	50.26	0.758	rgb(225, 72, 74)	1.997	2,2
Hif1a	Hk1	0.99942	50.26	0.755	rgb(225, 73, 74)	1.997	None
Hif1a	Mboat2	0.99942	50.26	0.764	rgb(225, 71, 73)	1.997	2,2
Zbtb7b	Decr1	-0.99942	50.26	-0.76	rgb( 52,117,246)	1.997	None
Hsf1	Smyd5	0.99939	50.28	0.779	rgb(226, 68, 70)	1.9974	None
Nr4a1	Nr4a3	0.99939	50.28	0.783	rgb(226, 67, 69)	1.9974	2,2
Hif1a	Arrb1	0.99935	50.25	0.754	rgb(225, 73, 75)	1.9968	None
Hif1a	Slc2a3	0.99935	50.25	0.754	rgb(225, 73, 74)	1.9968	2,2
E2f4	Rfwd3	0.99925	50.24	0.739	rgb(225, 76, 77)	1.9966	None
Epas1	Gata3	0.99925	50.26	0.758	rgb(225, 72, 74)	1.997	2,2
Irf1	Erap1	0.99925	50.26	0.757	rgb(225, 72, 74)	1.997	None
Zbed3	Zkscan17	0.99925	50.24	0.743	rgb(225, 75, 77)	1.9966	2,2
Zfp536	Lpin3	0.99925	50.26	0.761	rgb(225, 72, 73)	1.997	2,2
Irf7	Cmpk2	0.99922	50.25	0.752	rgb(225, 73, 75)	1.9968	2,2
Nfkb2	Psd	0.99922	50.25	0.749	rgb(225, 74, 76)	1.9968	None
Bcl6	Fam131b	0.99911	50.23	0.728	rgb(225, 78, 79)	1.9964	None
Sall4	Foxp3	0.99911	50.23	0.732	rgb(225, 77, 79)	1.9964	None
Sp3	Stom	0.99911	50.23	0.728	rgb(225, 78, 79)	1.9964	None
Zeb2	Spint1	0.99911	50.23	0.73	rgb(225, 78, 79)	1.9964	2,2
Zfp367	Dtl	0.99911	50.23	0.734	rgb(225, 77, 78)	1.9964	2,2
Zfp629	Ttbk2	0.99911	50.23	0.729	rgb(225, 78, 79)	1.9964	2,2
Egr1	Egr2	0.99899	50.24	0.74	rgb(225, 76, 77)	1.9966	None
Elf1	Pde7a	0.99899	50.24	0.741	rgb(225, 76, 77)	1.9966	None
Irf7	I830012O16Rik	0.99899	50.24	0.74	rgb(225, 76, 77)	1.9966	2,2
Srebf1	Sqle	0.99899	50.24	0.742	rgb(225, 75, 77)	1.9966	None
Zfp219	Stat4	0.99899	50.24	0.743	rgb(225, 75, 77)	1.9966	None
Zfp385a	Eng	0.99899	50.24	0.744	rgb(225, 75, 76)	1.9966	2,2
Gm14420	Cdkn2d	0.99892	50.22	0.715	rgb(225, 80, 82)	1.9962	2,2
Hif1a	H2-Ab1	0.99892	50.22	0.72	rgb(225, 79, 81)	1.9962	2,2
Hif1a	Narf	0.99892	50.22	0.721	rgb(225, 79, 81)	1.9962	None
Hif1a	Smtnl2	0.99892	50.22	0.725	rgb(225, 79, 80)	1.9962	2,2
Hsf1	Sf3b3	0.99886	50.23	0.729	rgb(225, 78, 79)	1.9964	None
Mxd3	Cdc25b	0.99886	50.23	0.728	rgb(225, 78, 79)	1.9964	2,2
Rara	Ifih1	-0.99886	50.23	-0.73	rgb( 58,121,245)	1.9964	None
Csrnp1	Mxd1	0.99877	50.21	0.707	rgb(225, 82, 83)	1.996	2,2
Hif1a	Pgam1	0.99877	50.21	0.715	rgb(225, 80, 82)	1.996	None
Mbd6	Crtc1	0.99877	50.21	0.712	rgb(225, 81, 82)	1.996	2,2
Smad3	Olfm2	0.99877	50.21	0.709	rgb(225, 82, 83)	1.996	None
Zfp536	Itsn1	0.99877	50.21	0.715	rgb(225, 80, 82)	1.996	2,2
C030039L03Rik	Ankzf1	0.99862	50.2	0.7	rgb(225, 83, 85)	1.9957	2,2
Cebpg	Pck2	0.99862	50.22	0.724	rgb(225, 79, 80)	1.9962	2,2
Hif1a	Hook2	0.99862	50.22	0.721	rgb(225, 79, 81)	1.9962	None
Hsf1	Mtrf1	-0.99862	50.22	-0.72	rgb( 61,122,244)	1.9962	None
Irf1	Gbp6	0.99862	50.22	0.723	rgb(225, 79, 80)	1.9962	2,2
Mxd1	Tns4	0.99862	50.2	0.703	rgb(225, 83, 84)	1.9957	2,2
Nfatc1	Foxp4	0.99862	50.22	0.723	rgb(225, 79, 80)	1.9962	None
Zfp277	Fam120c	-0.99862	50.22	-0.72	rgb( 61,122,244)	1.9962	2,2
Cxxc5	Nod1	0.99855	50.19	0.685	rgb(225, 86, 87)	1.9955	2,2
Hes1	Plxna1	0.99855	50.19	0.694	rgb(225, 84, 86)	1.9955	None
Smad3	Ctla2b	0.99855	50.19	0.686	rgb(225, 86, 87)	1.9955	None
Sox13	Capg	-0.99855	50.19	-0.69	rgb( 68,126,243)	1.9955	2,2
Hif1a	Bcar1	0.99845	50.18	0.68	rgb(224, 87, 88)	1.9953	2,2
Klf7	Tgfbr1	-0.99845	50.18	-0.68	rgb( 70,128,243)	1.9953	None
Tal2	Tmem38b	0.99845	50.18	0.677	rgb(224, 88, 89)	1.9953	2,2
Zfp182	Cysltr1	0.99845	50.18	0.683	rgb(225, 87, 88)	1.9953	None
Zfp429	Megf8	-0.99845	50.18	-0.68	rgb( 69,127,243)	1.9953	2,2
Hhex	Trpm6	0.99842	50.17	0.668	rgb(224, 89, 91)	1.9951	None
Hif1a	Unc13a	0.99842	50.17	0.667	rgb(224, 90, 91)	1.9951	2,2
Ahrr	Cyp1b1	0.99812	50.21	0.707	rgb(225, 82, 83)	1.996	2,2
Cebpg	Psph	0.99812	50.21	0.705	rgb(225, 82, 84)	1.996	2,2
Elf1	Slain1	0.99812	50.21	0.705	rgb(225, 82, 84)	1.996	None
Foxs1	Mylk2	0.99812	50.21	0.707	rgb(225, 82, 83)	1.996	2,2
Irf1	Gbp2	0.99812	50.21	0.707	rgb(225, 82, 83)	1.996	None
Irf1	Gbp5	0.99812	50.21	0.714	rgb(225, 81, 82)	1.996	None
Irf1	Gm4841	0.99812	50.21	0.713	rgb(225, 81, 82)	1.996	2,2
Irf7	2010002M12Rik	0.99812	50.21	0.708	rgb(225, 82, 83)	1.996	2,2
Irf7	Ifit3	0.99812	50.21	0.708	rgb(225, 82, 83)	1.996	2,2
Irf7	Mx1	0.99812	50.21	0.705	rgb(225, 82, 84)	1.996	2,2
Junb	Hook2	0.99812	50.21	0.707	rgb(225, 82, 83)	1.996	None
Rorc	Ccdc63	0.99812	50.21	0.709	rgb(225, 82, 83)	1.996	None
Sp110	Cdkn2d	0.99812	50.21	0.714	rgb(225, 81, 82)	1.996	2,2
Sp2	Slc39a9	0.99812	50.21	0.707	rgb(225, 82, 83)	1.996	None
Sp2	Zfp592	0.99812	50.21	0.71	rgb(225, 81, 83)	1.996	None
Zbtb17	Dnmt3a	0.99812	50.21	0.713	rgb(225, 81, 82)	1.996	2,2
Ankzf1	Rbfox2	0.99793	50.16	0.658	rgb(224, 91, 93)	1.9949	2,2
E2f1	Phospho1	0.99793	50.16	0.662	rgb(224, 91, 92)	1.9949	None
Gabpa	Gpatch4	0.99793	50.16	0.655	rgb(224, 92, 93)	1.9949	None
Hif1a	Fam71f2	0.99793	50.16	0.663	rgb(224, 90, 92)	1.9949	None
Hif1a	Me2	0.99793	50.16	0.661	rgb(224, 91, 92)	1.9949	2,2
Jdp2	P4ha2	-0.99793	50.16	-0.66	rgb( 75,130,242)	1.9949	2,2
Smad3	Nt5e	0.99793	50.16	0.66	rgb(224, 91, 92)	1.9949	None
Stat1	Zbp1	0.99793	50.16	0.664	rgb(224, 90, 91)	1.9949	None
Zfp318	Adora2b	-0.99793	50.16	-0.66	rgb( 74,130,242)	1.9949	2,2
Zfp536	Tekt2	0.99793	50.16	0.656	rgb(224, 92, 93)	1.9949	2,2
Cux1	Epb4.1l2	0.99775	50.2	0.699	rgb(225, 83, 85)	1.9957	2,2
E2f4	Lrrc59	0.99775	50.2	0.7	rgb(225, 83, 85)	1.9957	None
Ets1	Tex2	0.99775	50.2	0.699	rgb(225, 83, 85)	1.9957	None
Foxs1	Vax2	0.99775	50.2	0.695	rgb(225, 84, 86)	1.9957	2,2
Irf2	Wipf1	0.99775	50.2	0.704	rgb(225, 83, 84)	1.9957	None
Irf4	Abcd3	-0.99775	50.2	-0.7	rgb( 66,125,244)	1.9957	None
Mxd3	Smtn	0.99775	50.2	0.702	rgb(225, 83, 84)	1.9957	2,2
Rlf	3110057O12Rik	0.99775	50.2	0.7	rgb(225, 83, 85)	1.9957	2,2
Yy2	Pwwp2a	0.99775	50.2	0.695	rgb(225, 84, 86)	1.9957	None
Zfp202	Fam89a	0.99775	50.2	0.695	rgb(225, 84, 86)	1.9957	None
Atmin	Scyl2	0.9976	50.15	0.647	rgb(224, 93, 95)	1.9947	2,2
E2f4	Cdc25b	0.9976	50.15	0.648	rgb(224, 93, 95)	1.9947	None
Hif1a	Aldoc	0.9976	50.15	0.645	rgb(224, 94, 95)	1.9947	2,2
Hif1a	P4hb	0.9976	50.15	0.653	rgb(224, 92, 94)	1.9947	2,2
Hif1a	Pafah1b3	0.9976	50.15	0.65	rgb(224, 93, 94)	1.9947	2,2
Klf7	Hmgcl	0.9976	50.15	0.646	rgb(224, 94, 95)	1.9947	None
Satb1	Hif1a	0.9976	50.15	0.648	rgb(224, 93, 95)	1.9947	2,2
Zfp367	Exo1	0.9976	50.18	0.681	rgb(224, 87, 88)	1.9953	2,2
C030039L03Rik	Muc2	0.99745	50.19	0.692	rgb(225, 85, 86)	1.9955	2,2
E2f1	Wee1	0.99745	50.19	0.694	rgb(225, 85, 86)	1.9955	None
Elk3	Capg	0.99745	50.19	0.685	rgb(225, 86, 88)	1.9955	2,2
Epas1	Gsn	0.99745	50.19	0.694	rgb(225, 84, 86)	1.9955	2,2
Irf1	Igtp	0.99745	50.19	0.691	rgb(225, 85, 86)	1.9955	2,2
Irf7	Oasl2	0.99745	50.19	0.692	rgb(225, 85, 86)	1.9955	2,2
Sp110	Bcl2a1b	0.99745	50.19	0.688	rgb(225, 86, 87)	1.9955	2,2
Zfp385a	Zmat3	0.99745	50.19	0.693	rgb(225, 85, 86)	1.9955	2,2
Ankzf1	3110057O12Rik	0.99715	50.14	0.643	rgb(224, 94, 95)	1.9945	2,2
Cebpb	Myd88	-0.99715	50.14	-0.64	rgb( 79,133,241)	1.9945	None
Creb1	Ubash3b	-0.99715	50.14	-0.64	rgb( 78,132,241)	1.9945	None
Dpf1	Gipr	0.99715	50.14	0.645	rgb(224, 94, 95)	1.9945	2,2
E2f4	Arhgap33	0.99715	50.14	0.64	rgb(224, 95, 96)	1.9945	None
Etv6	Naca	0.99715	50.14	0.638	rgb(224, 95, 96)	1.9945	None
Hif1a	Cep170	0.99715	50.14	0.637	rgb(224, 95, 97)	1.9945	None
Klf5	Plxnb1	0.99715	50.14	0.644	rgb(224, 94, 95)	1.9945	None
Klf8	Hist1h1a	0.99715	50.14	0.639	rgb(224, 95, 96)	1.9945	None
Nfatc4	Eea1	0.99715	50.14	0.638	rgb(224, 95, 96)	1.9945	None
Sp2	Ier3	0.99715	50.14	0.638	rgb(224, 95, 96)	1.9945	None
Xbp1	Stab1	-0.99715	50.14	-0.64	rgb( 79,133,241)	1.9945	None
Zfp277	Tmem35	0.99715	50.16	0.658	rgb(224, 91, 93)	1.9949	2,2
Zfp318	Maged1	0.99715	50.14	0.642	rgb(224, 94, 96)	1.9945	2,2
Zfp367	Apitd1	0.99715	50.14	0.64	rgb(224, 95, 96)	1.9945	2,2
Zfp948	Ankrd23	0.99715	50.14	0.696	rgb(225, 84, 85)	1.9945	2,2
E2f4	Tnfrsf18	-0.99689	50.18	-0.68	rgb( 69,127,243)	1.9953	None
Egr2	Runx1	0.99689	50.18	0.679	rgb(224, 87, 89)	1.9953	None
Gfi1	Rgmb	-0.99689	50.18	-0.68	rgb( 70,127,243)	1.9953	2,2
Irf1	Fam26f	0.99689	50.18	0.677	rgb(224, 88, 89)	1.9953	None
Irf5	St14	0.99689	50.18	0.676	rgb(224, 88, 89)	1.9953	2,2
Klf10	Rara	0.99689	50.18	0.68	rgb(224, 87, 88)	1.9953	None
Runx2	Galnt3	0.99689	50.18	0.68	rgb(224, 87, 88)	1.9953	None
Sp110	Max	0.99689	50.18	0.684	rgb(225, 86, 88)	1.9953	2,2
Sp2	Drosha	0.99689	50.18	0.684	rgb(225, 86, 88)	1.9953	None
Sp2	E2f7	0.99689	50.18	0.683	rgb(225, 87, 88)	1.9953	None
Srebf2	Kdm2b	0.99689	50.18	0.679	rgb(224, 87, 89)	1.9953	None
Tcf3	Sh2d3c	0.99689	50.18	0.675	rgb(224, 88, 89)	1.9953	None
Zfp429	Apold1	-0.99689	50.18	-0.68	rgb( 70,128,243)	1.9953	2,2
Zmat1	Fam120c	0.99689	50.18	0.68	rgb(224, 87, 89)	1.9953	2,2
Foxp2	Sh2d4a	0.99663	50.13	0.628	rgb(224, 97, 98)	1.9943	2,2
Hif1a	Egln3	0.99663	50.13	0.63	rgb(224, 97, 98)	1.9943	None
Hif1a	Fzd7	0.99663	50.13	0.63	rgb(224, 97, 98)	1.9943	2,2
Hif1a	Xpnpep1	0.99663	50.13	0.629	rgb(224, 97, 98)	1.9943	2,2
Irf9	Ifit3	0.99663	50.13	0.625	rgb(224, 98, 99)	1.9943	2,2
Nr4a1	Thap2	0.99663	50.13	0.629	rgb(224, 97, 98)	1.9943	None
Rela	Zfp280b	0.99663	50.13	0.635	rgb(224, 96, 97)	1.9943	None
Stat1	Pml	0.99663	50.13	0.633	rgb(224, 96, 97)	1.9943	2,2
Stat3	Chmp4b	0.99663	50.13	0.626	rgb(224, 97, 99)	1.9943	None
Stat3	Klhl6	0.99663	50.13	0.632	rgb(224, 96, 97)	1.9943	None
Stat3	Sesn3	0.99663	50.13	0.63	rgb(224, 97, 98)	1.9943	None
Tet1	Hist1h1b	0.99663	50.13	0.629	rgb(224, 97, 98)	1.9943	None
Zfp473	Sec24d	0.99663	50.13	0.625	rgb(224, 98, 99)	1.9943	2,2
Zfp948	Slc9a8	0.99663	50.13	0.63	rgb(224, 97, 98)	1.9943	2,2
Bhlhe40	Ndrg2	0.99629	50.17	0.674	rgb(224, 88, 90)	1.9951	None
Elf1	Arhgef6	0.99629	50.17	0.672	rgb(224, 89, 90)	1.9951	None
Ets2	2018-09-09	-0.99629	50.17	-0.67	rgb( 71,128,243)	1.9951	None
Hsf1	Rwdd2a	-0.99629	50.17	-0.67	rgb( 71,128,242)	1.9951	None
Irf4	Crtam	-0.99629	50.17	-0.67	rgb( 72,129,242)	1.9951	2,2
Irf5	Gna15	0.99629	50.17	0.673	rgb(224, 88, 90)	1.9951	2,2
Prrx1	Cav1	0.99629	50.17	0.672	rgb(224, 89, 90)	1.9951	2,2
Rxra	Fgf2	0.99629	50.17	0.673	rgb(224, 89, 90)	1.9951	None
Rxra	Slain1	0.99629	50.17	0.666	rgb(224, 90, 91)	1.9951	None
Sgsm2	Tert	0.99629	50.17	0.67	rgb(224, 89, 90)	1.9951	2,2
Sp2	Hist3h2bb-ps	-0.99629	50.17	-0.67	rgb( 71,128,243)	1.9951	None
Sp2	Zcchc2	0.99629	50.17	0.673	rgb(224, 88, 90)	1.9951	None
Srf	Notch1	0.99629	50.17	0.666	rgb(224, 90, 91)	1.9951	None
Tal2	Nfkbie	0.99629	50.17	0.668	rgb(224, 89, 91)	1.9951	None
Tigd2	Utf1	-0.99629	50.17	-0.67	rgb( 72,129,242)	1.9951	2,2
Vax2	Avpi1	0.99629	50.17	0.672	rgb(224, 89, 90)	1.9951	None
Zfp467	Wnt10a	0.99629	50.17	0.671	rgb(224, 89, 90)	1.9951	None
Zfp787	Zfp668	0.99629	50.17	0.672	rgb(224, 89, 90)	1.9951	2,2
Dpf1	Tead3	0.99598	50.12	0.622	rgb(224, 98, 99)	1.9941	2,2
Etv6	Icam2	0.99598	50.12	0.621	rgb(224, 98,100)	1.9941	2,2
Hif1a	Helb	0.99598	50.12	0.621	rgb(224, 98,100)	1.9941	2,2
Hif1a	Pfkp	0.99598	50.12	0.615	rgb(224, 99,101)	1.9941	2,2
Irf2	Gm4759	0.99598	50.12	0.62	rgb(224, 99,100)	1.9941	2,2
Irf9	Parp9	0.99598	50.12	0.624	rgb(224, 98, 99)	1.9941	None
Klf5	Mapk11	0.99598	50.12	0.617	rgb(224, 99,100)	1.9941	None
Klf8	Znhit6	-0.99598	50.12	-0.62	rgb( 83,136,240)	1.9941	None
Mycn	Ptp4a3	0.99598	50.12	0.623	rgb(224, 98, 99)	1.9941	None
Satb1	Gfi1	0.99598	50.12	0.619	rgb(224, 99,100)	1.9941	2,2
Stat4	Lama5	0.99598	50.12	0.622	rgb(224, 98,100)	1.9941	None
Tcf12	Fut4	0.99598	50.12	0.622	rgb(224, 98, 99)	1.9941	None
Whsc1	D830031N03Rik	0.99598	50.12	0.617	rgb(224, 99,100)	1.9941	2,2
Zfp169	Inpp4a	0.99598	50.12	0.618	rgb(224, 99,100)	1.9941	2,2
Zfp354c	Acpp	0.99598	50.12	0.621	rgb(224, 98,100)	1.9941	2,2
Zfp385a	Psrc1	0.99598	50.12	0.623	rgb(224, 98, 99)	1.9941	2,2
Zfp473	Fkrp	-0.99598	50.13	-0.63	rgb( 79,133,241)	1.9943	2,2
Ankzf1	Arid3a	0.99575	50.16	0.656	rgb(224, 92, 93)	1.9949	2,2
E2f1	Exo1	0.99575	50.16	0.662	rgb(224, 90, 92)	1.9949	None
Ets1	Pdcd1lg2	-0.99575	50.16	-0.66	rgb( 74,130,242)	1.9949	None
Hbp1	Rpusd2	-0.99575	50.16	-0.66	rgb( 74,130,242)	1.9949	None
Irf5	Unc93b1	0.99575	50.16	0.662	rgb(224, 91, 92)	1.9949	2,2
Jdp2	Pck2	0.99575	50.16	0.664	rgb(224, 90, 91)	1.9949	2,2
Jun	Stat5b	0.99575	50.16	0.663	rgb(224, 90, 92)	1.9949	None
Mxi1	Ypel5	0.99575	50.16	0.665	rgb(224, 90, 91)	1.9949	None
Setdb2	Rara	-0.99575	50.16	-0.66	rgb( 73,129,242)	1.9949	2,2
Sp2	Crtc1	0.99575	50.16	0.665	rgb(224, 90, 91)	1.9949	None
Srf	Ccdc107	-0.99575	50.16	-0.66	rgb( 74,130,242)	1.9949	None
Vax2	Il17re	0.99575	50.16	0.661	rgb(224, 91, 92)	1.9949	2,2
Fos	Tubb6	0.99557	50.11	0.608	rgb(224,101,102)	1.9939	None
Klf5	Als2cl	0.99557	50.11	0.615	rgb(224,100,101)	1.9939	None
Klf6	Paqr8	0.99557	50.11	0.607	rgb(224,101,102)	1.9939	2,2
Lcor	Rgs16	0.99557	50.11	0.612	rgb(224,100,101)	1.9939	2,2
Nfia	Dapl1	0.99557	50.11	0.61	rgb(224,100,102)	1.9939	None
Plscr1	Asns	0.99557	50.11	0.612	rgb(224,100,101)	1.9939	2,2
Rela	Ptpn1	-0.99557	50.11	-0.61	rgb( 85,137,240)	1.9939	None
Skil	Acvr1b	0.99557	50.11	0.605	rgb(224,101,103)	1.9939	2,2
Sp140	Mpzl3	0.99557	50.11	0.613	rgb(224,100,101)	1.9939	2,2
Zfp956	Map3k14	0.99557	50.11	0.608	rgb(224,101,102)	1.9939	2,2
C030039L03Rik	Prkab2	0.99523	50.15	0.647	rgb(224, 93, 95)	1.9947	2,2
Irf7	Gbp9	0.99523	50.15	0.653	rgb(224, 92, 94)	1.9947	2,2
Irf7	Isg20	0.99523	50.15	0.647	rgb(224, 93, 95)	1.9947	None
Jun	Kdelc2	-0.99523	50.15	-0.65	rgb( 75,131,242)	1.9947	2,2
Mxd4	Ypel3	0.99523	50.15	0.652	rgb(224, 92, 94)	1.9947	2,2
Plscr1	Clic4	0.99523	50.15	0.648	rgb(224, 93, 95)	1.9947	2,2
Rela	Ppic	-0.99523	50.15	-0.65	rgb( 75,131,242)	1.9947	None
Sox5	Tbc1d30	-0.99523	50.15	-0.65	rgb( 76,131,242)	1.9947	None
Sp110	Ly6c1	0.99523	50.15	0.647	rgb(224, 93, 95)	1.9947	2,2
Sp3	4931406P16Rik	0.99523	50.15	0.649	rgb(224, 93, 94)	1.9947	None
Sp4	Dctn4	0.99523	50.15	0.651	rgb(224, 93, 94)	1.9947	None
Tcf12	H2-Ab1	-0.99523	50.15	-0.65	rgb( 76,131,242)	1.9947	None
Yy2	Smek1	0.99523	50.15	0.653	rgb(224, 92, 94)	1.9947	None
Zbtb7a	Bcl11b	0.99523	50.15	0.652	rgb(224, 92, 94)	1.9947	None
Zfp202	Dusp12	0.99523	50.15	0.648	rgb(224, 93, 95)	1.9947	2,2
Zfp367	Rpa2	0.99523	50.15	0.646	rgb(224, 94, 95)	1.9947	2,2
Zfx	Cisd3	-0.99523	50.15	-0.65	rgb( 75,131,242)	1.9947	2,2
Zscan29	Smarca2	0.99523	50.15	0.654	rgb(224, 92, 93)	1.9947	2,2
Batf3	Akr1cl	0.99471	50.1	0.596	rgb(224,103,104)	1.9937	None
Egr1	Arhgap12	-0.99471	50.1	-0.6	rgb( 88,138,240)	1.9937	None
Fli1	Dffb	0.99471	50.1	0.603	rgb(224,102,103)	1.9937	None
Gata1	Gm4013	0.99471	50.1	0.605	rgb(224,101,103)	1.9937	None
Gtf2ird1	S100a4	0.99471	50.1	0.596	rgb(224,103,104)	1.9937	2,2
Hes1	Dirc2	-0.99471	50.1	-0.6	rgb( 88,138,240)	1.9937	None
Hif1a	Epm2a	0.99471	50.1	0.597	rgb(224,103,104)	1.9937	2,2
Hif1a	P4ha2	0.99471	50.1	0.595	rgb(224,103,104)	1.9937	2,2
Jazf1	4930506M07Rik	0.99471	50.1	0.597	rgb(224,103,104)	1.9937	2,2
Klf7	Ascc1	0.99471	50.1	0.602	rgb(224,102,103)	1.9937	None
Litaf	Tfpi	-0.99471	50.1	-0.6	rgb( 87,138,240)	1.9937	2,2
Ncoa1	Tmem184b	0.99471	50.1	0.596	rgb(224,103,104)	1.9937	2,2
Nfkb2	Ccdc50	0.99471	50.1	0.599	rgb(224,103,104)	1.9937	None
Nhlh1	Trib2	0.99471	50.1	0.604	rgb(224,102,103)	1.9937	None
Nkx1-2	Sqle	0.99471	50.1	0.596	rgb(224,103,104)	1.9937	None
Nr3c1	Aen	0.99471	50.1	0.6	rgb(224,102,104)	1.9937	None
Rora	Adam8	0.99471	50.1	0.598	rgb(224,103,104)	1.9937	None
Sox4	Ica1l	0.99471	50.1	0.604	rgb(224,102,103)	1.9937	None
Sp2	Gatm	0.99471	50.1	0.6	rgb(224,102,104)	1.9937	None
Sp2	Sra1	0.99471	50.1	0.598	rgb(224,103,104)	1.9937	None
Tead1	Paqr3	-0.99471	50.1	-0.6	rgb( 87,138,240)	1.9937	2,2
Terf1	2310033P09Rik	0.99471	50.1	0.599	rgb(224,103,104)	1.9937	2,2
Trerf1	Dtx4	0.99471	50.1	0.6	rgb(224,102,104)	1.9937	None
Yy2	Slc9a8	0.99471	50.1	0.598	rgb(224,103,104)	1.9937	None
Zbtb3	Ppme1	0.99471	50.1	0.597	rgb(224,103,104)	1.9937	None
Zfp113	Dock3	-0.99471	50.1	-0.6	rgb( 88,138,240)	1.9937	2,2
Zfp35	Tsr2	0.99471	50.1	0.599	rgb(224,103,104)	1.9937	2,2
Zfp827	Susd3	-0.99471	50.1	-0.6	rgb( 87,138,240)	1.9937	2,2
Adnp	Dcxr	-0.9943	50.14	-0.64	rgb( 79,133,241)	1.9945	2,2
Arid5a	Sbno2	0.9943	50.14	0.643	rgb(224, 94, 95)	1.9945	2,2
Bhlhe40	Tg	0.9943	50.14	0.643	rgb(224, 94, 95)	1.9945	None
Creb3l2	Gatsl2	0.9943	50.14	0.637	rgb(224, 95, 97)	1.9945	2,2
Elk3	Tmem19	0.9943	50.14	0.636	rgb(224, 96, 97)	1.9945	None
Epas1	Mllt3	0.9943	50.14	0.64	rgb(224, 95, 96)	1.9945	None
Foxf2	Myo3b	0.9943	50.14	0.636	rgb(224, 95, 97)	1.9945	None
Ikzf2	Cd160	0.9943	50.14	0.636	rgb(224, 96, 97)	1.9945	2,2
Irf4	Spry2	-0.9943	50.14	-0.64	rgb( 77,132,242)	1.9945	None
Klf2	Gpr146	0.9943	50.14	0.637	rgb(224, 95, 97)	1.9945	None
Myc	Lactb	-0.9943	50.14	-0.64	rgb( 78,132,241)	1.9945	None
Plagl1	Cd180	0.9943	50.14	0.642	rgb(224, 94, 96)	1.9945	2,2
Rbpj	Nfil3	0.9943	50.14	0.64	rgb(224, 95, 96)	1.9945	2,2
Sp3	Uqcrq	-0.9943	50.14	-0.64	rgb( 78,133,241)	1.9945	None
Sp4	Cnnm3	-0.9943	50.14	-0.64	rgb( 78,132,241)	1.9945	None
Sp4	Ptpn2	0.9943	50.14	0.641	rgb(224, 95, 96)	1.9945	None
Srf	Wdr1	0.9943	50.14	0.638	rgb(224, 95, 96)	1.9945	None
Tbx21	Notch1	0.9943	50.14	0.639	rgb(224, 95, 96)	1.9945	2,2
Tead1	Nupr1	0.9943	50.14	0.643	rgb(224, 94, 96)	1.9945	2,2
Vax2	Dab2	0.9943	50.14	0.638	rgb(224, 95, 96)	1.9945	2,2
Xbp1	Bpnt1	-0.9943	50.14	-0.64	rgb( 78,132,241)	1.9945	None
Zfp629	Dnmt3b	0.9943	50.14	0.639	rgb(224, 95, 96)	1.9945	2,2
Aebp2	Nlgn2	0.99326	50.09	0.59	rgb(223,104,105)	1.9935	2,2
Ahrr	Gpr15	0.99326	50.13	0.631	rgb(224, 96, 98)	1.9943	2,2
Ankzf1	Rgs11	0.99326	50.09	0.587	rgb(223,105,106)	1.9935	2,2
Arid2	Gys1	0.99326	50.09	0.592	rgb(224,104,105)	1.9935	None
Arid3a	Ahnak	0.99326	50.13	0.63	rgb(224, 97, 98)	1.9943	None
Atf3	Batf3	0.99326	50.13	0.633	rgb(224, 96, 97)	1.9943	2,2
Bcl6	Ccdc63	0.99326	50.09	0.591	rgb(223,104,105)	1.9935	None
C030039L03Rik	Gapdhs	0.99326	50.09	0.586	rgb(223,105,106)	1.9935	2,2
Cebpg	Fam20a	0.99326	50.09	0.59	rgb(223,104,105)	1.9935	None
Cebpg	Slc7a3	0.99326	50.13	0.634	rgb(224, 96, 97)	1.9943	2,2
Dmrt1	Kdm2b	0.99326	50.09	0.585	rgb(223,105,106)	1.9935	None
Ets1	Kif13b	-0.99326	50.09	-0.59	rgb( 89,139,239)	1.9935	None
Etv4	Dusp9	0.99326	50.13	0.626	rgb(224, 97, 99)	1.9943	2,2
Etv5	Zfp408	0.99326	50.09	0.589	rgb(223,104,106)	1.9935	None
Etv6	Myo18a	-0.99326	50.09	-0.59	rgb( 88,139,240)	1.9935	None
Foxo1	Sepp1	0.99326	50.09	0.591	rgb(224,104,105)	1.9935	None
Foxo3	Stx2	0.99326	50.09	0.591	rgb(224,104,105)	1.9935	None
Hic1	Itga4	0.99326	50.13	0.63	rgb(224, 97, 98)	1.9943	None
Hif1a	Agl	0.99326	50.09	0.593	rgb(224,104,105)	1.9935	2,2
Hif1a	Ppp1r3b	0.99326	50.09	0.593	rgb(224,104,105)	1.9935	2,2
Hif1a	Pygl	0.99326	50.09	0.592	rgb(224,104,105)	1.9935	2,2
Hif1a	Rab39	0.99326	50.09	0.594	rgb(224,104,105)	1.9935	None
Hif1a	Sav1	0.99326	50.09	0.592	rgb(224,104,105)	1.9935	2,2
Hlx	Tmem163	0.99326	50.13	0.628	rgb(224, 97, 98)	1.9943	2,2
Irf1	Gbp7	0.99326	50.13	0.631	rgb(224, 97, 98)	1.9943	None
Irf2	Gimap7	0.99326	50.13	0.631	rgb(224, 96, 98)	1.9943	None
Irf4	Slfn2	0.99326	50.13	0.63	rgb(224, 97, 98)	1.9943	None
Irf7	Pydc4	0.99326	50.13	0.628	rgb(224, 97, 98)	1.9943	2,2
Maf	Cdh23	0.99326	50.13	0.628	rgb(224, 97, 98)	1.9943	None
Maf	Emp1	0.99326	50.13	0.628	rgb(224, 97, 98)	1.9943	None
Myc	Tmem43	-0.99326	50.13	-0.63	rgb( 79,133,241)	1.9943	None
Nr4a3	Cbx4	-0.99326	50.09	-0.59	rgb( 89,139,239)	1.9935	2,2
Osr2	Serpinb1b	0.99326	50.13	0.627	rgb(224, 97, 99)	1.9943	2,2
Rbpj	Nckap1	0.99326	50.13	0.627	rgb(224, 97, 98)	1.9943	2,2
Rel	Nfkb2	0.99326	50.09	0.589	rgb(223,104,106)	1.9935	None
Rfx1	Psme1	-0.99326	50.13	-0.63	rgb( 80,133,241)	1.9943	None
Rxrb	Ahrr	-0.99326	50.09	-0.59	rgb( 89,139,239)	1.9935	2,2
Smad3	Lrmp	-0.99326	50.09	-0.59	rgb( 88,138,240)	1.9935	None
Smad4	Itpr3	0.99326	50.13	0.627	rgb(224, 97, 98)	1.9943	None
Sp4	Syde1	0.99326	50.13	0.631	rgb(224, 96, 98)	1.9943	None
Srf	Lrrfip1	0.99326	50.09	0.587	rgb(223,105,106)	1.9935	None
Stat2	Il15ra	0.99326	50.09	0.587	rgb(223,105,106)	1.9935	2,2
Stat3	Cmtm7	-0.99326	50.09	-0.59	rgb( 89,139,239)	1.9935	2,2
Tcf12	L3mbtl3	0.99326	50.13	0.634	rgb(224, 96, 97)	1.9943	None
Tcf3	Epsti1	0.99326	50.09	0.589	rgb(223,104,106)	1.9935	None
Xbp1	Rpl36al	-0.99326	50.13	-0.63	rgb( 81,134,241)	1.9943	None
Zeb2	Oaf	0.99326	50.09	0.594	rgb(224,104,105)	1.9935	2,2
Zfp263	Raph1	0.99326	50.09	0.59	rgb(223,104,106)	1.9935	None
Zfp280b	Sytl3	-0.99326	50.09	-0.59	rgb( 89,139,239)	1.9935	2,2
Zfp35	Mmachc	0.99326	50.13	0.632	rgb(224, 96, 98)	1.9943	2,2
Zfp385a	Zfp365	0.99326	50.13	0.633	rgb(224, 96, 97)	1.9943	2,2
Zfp420	Scarf2	-0.99326	50.13	-0.63	rgb( 80,134,241)	1.9943	2,2
Zfp473	Sema6b	0.99326	50.09	0.592	rgb(224,104,105)	1.9935	2,2
Zfp536	Mapk8ip1	0.99326	50.09	0.592	rgb(224,104,105)	1.9935	2,2
Zfp59	Zfp346	0.99326	50.13	0.629	rgb(224, 97, 98)	1.9943	2,2
Zfp787	Ocrl	-0.99326	50.13	-0.63	rgb( 80,134,241)	1.9943	2,2
Elf1	Stk4	0.99285	50.12	0.619	rgb(224, 99,100)	1.9941	None
Foxp3	Nt5e	0.99285	50.12	0.62	rgb(224, 99,100)	1.9941	None
Hsf1	Ifi27l2a	-0.99285	50.12	-0.62	rgb( 82,135,241)	1.9941	None
Ikzf3	Pkp4	-0.99285	50.12	-0.62	rgb( 83,135,241)	1.9941	None
Irf1	Tgtp2	0.99285	50.12	0.623	rgb(224, 98, 99)	1.9941	None
Irf7	BC094916	0.99285	50.12	0.615	rgb(224,100,101)	1.9941	None
Irf7	Ccrl2	0.99285	50.12	0.617	rgb(224, 99,100)	1.9941	2,2
Irf7	Gbp6	0.99285	50.12	0.622	rgb(224, 98, 99)	1.9941	2,2
Klf6	Crtc1	-0.99285	50.12	-0.62	rgb( 82,135,241)	1.9941	2,2
Mxi1	Ppp1r13l	0.99285	50.12	0.621	rgb(224, 98,100)	1.9941	None
Nfkb1	Emb	-0.99285	50.12	-0.62	rgb( 83,136,240)	1.9941	None
Nfkb2	Ets1	-0.99285	50.12	-0.62	rgb( 83,135,240)	1.9941	None
Nr4a1	Nfkbie	0.99285	50.12	0.617	rgb(224, 99,100)	1.9941	2,2
Ski	Slc43a2	0.99285	50.12	0.622	rgb(224, 98, 99)	1.9941	2,2
Skil	Slco4a1	-0.99285	50.12	-0.62	rgb( 82,135,241)	1.9941	2,2
Tcf12	Mycbp2	0.99285	50.12	0.621	rgb(224, 98,100)	1.9941	2,2
Thap1	Dffb	0.99285	50.12	0.618	rgb(224, 99,100)	1.9941	None
Xbp1	9930014A18Rik	-0.99285	50.12	-0.62	rgb( 83,135,241)	1.9941	None
Zfp263	Arhgef6	-0.99285	50.12	-0.62	rgb( 81,135,241)	1.9941	None
Zfp329	A230072C01Rik	0.99285	50.12	0.617	rgb(224, 99,100)	1.9941	2,2
Zfp35	Zscan21	0.99285	50.12	0.623	rgb(224, 98, 99)	1.9941	2,2
Zfp513	Vdac1	-0.99285	50.12	-0.62	rgb( 82,135,241)	1.9941	2,2
Bhlhe40	Smagp	-0.99221	50.08	-0.58	rgb( 90,140,239)	1.9933	None
Crem	Gpr97	0.99221	50.08	0.579	rgb(223,106,108)	1.9933	2,2
Dpf1	Porcn	0.99221	50.08	0.581	rgb(223,106,107)	1.9933	2,2
E2f1	Cep76	0.99221	50.08	0.576	rgb(223,107,108)	1.9933	None
E2f1	Cmtm4	0.99221	50.08	0.576	rgb(223,107,108)	1.9933	None
E2f4	Dars2	0.99221	50.08	0.578	rgb(223,107,108)	1.9933	None
Gabpa	Heatr1	0.99221	50.08	0.577	rgb(223,107,108)	1.9933	None
Gata3	Filip1l	0.99221	50.08	0.579	rgb(223,106,108)	1.9933	None
Hif1a	Atp7b	0.99221	50.08	0.584	rgb(223,105,107)	1.9933	2,2
Hif1a	Piga	0.99221	50.08	0.578	rgb(223,107,108)	1.9933	2,2
Hif1a	Sap30	0.99221	50.08	0.581	rgb(223,106,107)	1.9933	None
Irf9	Rasa4	0.99221	50.08	0.581	rgb(223,106,107)	1.9933	2,2
Klf12	Slc41a3	0.99221	50.08	0.579	rgb(223,106,108)	1.9933	None
Klf5	Arid5a	0.99221	50.08	0.575	rgb(223,107,108)	1.9933	None
Maff	Gm14057	0.99221	50.08	0.579	rgb(223,106,108)	1.9933	2,2
Nr3c1	Gemin6	0.99221	50.08	0.576	rgb(223,107,108)	1.9933	None
Plagl2	Marveld1	0.99221	50.08	0.584	rgb(223,106,107)	1.9933	2,2
Pparg	Sf3b3	0.99221	50.08	0.58	rgb(223,106,107)	1.9933	None
Prdm8	Antxr2	0.99221	50.08	0.58	rgb(223,106,107)	1.9933	2,2
Prox1	Gbp7	0.99221	50.08	0.584	rgb(223,106,107)	1.9933	None
Rbpj	Hemk1	-0.99221	50.08	-0.58	rgb( 90,140,239)	1.9933	2,2
Rora	Galnt12	0.99221	50.08	0.582	rgb(223,106,107)	1.9933	None
Scrt1	Mxd1	0.99221	50.08	0.58	rgb(223,106,107)	1.9933	None
Six5	Stom	-0.99221	50.08	-0.58	rgb( 91,140,239)	1.9933	2,2
Terf1	H1f0	0.99221	50.08	0.579	rgb(223,106,108)	1.9933	2,2
Tet1	Hist1h1e	0.99221	50.08	0.579	rgb(223,107,108)	1.9933	2,2
Zbtb7a	Zc3h6	0.99221	50.08	0.585	rgb(223,105,107)	1.9933	None
Zeb2	Srgap3	0.99221	50.08	0.581	rgb(223,106,107)	1.9933	2,2
Zfp358	Sorcs2	-0.99221	50.08	-0.58	rgb( 91,140,239)	1.9933	2,2
Zfp395	Nrn1	0.99221	50.08	0.577	rgb(223,107,108)	1.9933	2,2
Zfp429	Snhg6	0.99221	50.08	0.577	rgb(223,107,108)	1.9933	2,2
Zfp523	Arntl2	-0.99221	50.08	-0.58	rgb( 91,140,239)	1.9933	None
Zfp536	Rpl10a	0.99221	50.08	0.578	rgb(223,107,108)	1.9933	2,2
Zfp608	Socs2	0.99221	50.08	0.581	rgb(223,106,107)	1.9933	2,2
Ankzf1	Pdia2	0.99158	50.11	0.606	rgb(224,101,102)	1.9939	2,2
Atf5	Minpp1	-0.99158	50.11	-0.61	rgb( 84,136,240)	1.9939	2,2
C030039L03Rik	Per2	0.99158	50.11	0.608	rgb(224,101,102)	1.9939	2,2
Cebpg	Chac1	0.99158	50.11	0.606	rgb(224,101,102)	1.9939	2,2
Cic	Trappc10	0.99158	50.11	0.613	rgb(224,100,101)	1.9939	None
Ets1	Slc9a3r1	0.99158	50.11	0.61	rgb(224,100,102)	1.9939	None
Ets2	Ifit2	0.99158	50.11	0.607	rgb(224,101,102)	1.9939	2,2
Etv6	Cnga1	-0.99158	50.11	-0.61	rgb( 85,137,240)	1.9939	None
Irf4	Nox1	-0.99158	50.11	-0.61	rgb( 86,137,240)	1.9939	2,2
Irf4	Srgap3	-0.99158	50.11	-0.61	rgb( 84,136,240)	1.9939	2,2
Irf8	Tbx21	0.99158	50.11	0.612	rgb(224,100,101)	1.9939	2,2
Jun	Osm	0.99158	50.11	0.612	rgb(224,100,101)	1.9939	2,2
Kdm2b	Mxd1	-0.99158	50.11	-0.61	rgb( 85,137,240)	1.9939	2,2
Myb	B4galnt1	0.99158	50.11	0.612	rgb(224,100,101)	1.9939	2,2
Nfil3	Glipr2	0.99158	50.11	0.608	rgb(224,101,102)	1.9939	2,2
Nfkb1	Fbxo11	0.99158	50.11	0.613	rgb(224,100,101)	1.9939	None
Nfkb1	Mbp	0.99158	50.11	0.611	rgb(224,100,102)	1.9939	None
Nr4a1	Marcksl1	0.99158	50.11	0.615	rgb(224,100,101)	1.9939	2,2
Nr4a2	Fosl2	0.99158	50.11	0.61	rgb(224,100,102)	1.9939	2,2
Patz1	Dusp6	0.99158	50.11	0.611	rgb(224,100,101)	1.9939	None
Pou6f1	Ccr5	0.99158	50.11	0.612	rgb(224,100,101)	1.9939	2,2
Rela	Ifit2	-0.99158	50.11	-0.61	rgb( 84,136,240)	1.9939	None
Rxra	Emilin1	0.99158	50.11	0.607	rgb(224,101,102)	1.9939	None
Rxra	Fas	-0.99158	50.11	-0.61	rgb( 84,136,240)	1.9939	None
Scrt1	Cyp2s1	0.99158	50.11	0.609	rgb(224,101,102)	1.9939	2,2
Smad3	Bcl3	0.99158	50.11	0.605	rgb(224,101,103)	1.9939	None
Sp2	Dcakd	0.99158	50.11	0.607	rgb(224,101,102)	1.9939	None
Sp2	Hist2h4	-0.99158	50.11	-0.61	rgb( 85,136,240)	1.9939	None
Sp4	Chd7	0.99158	50.11	0.612	rgb(224,100,101)	1.9939	None
Sp4	Ermn	0.99158	50.11	0.615	rgb(224,100,101)	1.9939	2,2
Sp4	Neto2	-0.99158	50.11	-0.61	rgb( 84,136,240)	1.9939	None
Tcf12	Pafah1b3	-0.99158	50.11	-0.61	rgb( 85,137,240)	1.9939	2,2
Trps1	Sirpa	-0.99158	50.11	-0.61	rgb( 84,136,240)	1.9939	2,2
Zfp329	Gripap1	0.99158	50.11	0.611	rgb(224,100,102)	1.9939	2,2
Crem	Nr4a1	0.99096	50.07	0.568	rgb(223,109,110)	1.9931	2,2
Dmrt1	Gbp7	0.99096	50.07	0.574	rgb(223,107,109)	1.9931	None
Egr2	Arrb1	0.99096	50.07	0.575	rgb(223,107,108)	1.9931	None
Elf1	Otud1	0.99096	50.07	0.572	rgb(223,108,109)	1.9931	None
Gabpa	Zfp568	0.99096	50.07	0.566	rgb(223,109,110)	1.9931	None
Hif1a	Plcxd1	0.99096	50.07	0.571	rgb(223,108,109)	1.9931	2,2
Hmg20b	Flt3l	-0.99096	50.07	-0.57	rgb( 93,142,239)	1.9931	2,2
Klf6	Bid	-0.99096	50.07	-0.57	rgb( 94,142,239)	1.9931	2,2
Lin54	Hist1h1b	0.99096	50.07	0.571	rgb(223,108,109)	1.9931	None
Lin54	Hist1h1e	0.99096	50.07	0.566	rgb(223,109,110)	1.9931	None
Nfatc2	Atxn1	0.99096	50.07	0.566	rgb(223,109,110)	1.9931	None
Nhlh1	Tsc22d3	0.99096	50.07	0.569	rgb(223,108,109)	1.9931	None
Nr3c1	P2rx5	0.99096	50.07	0.566	rgb(223,109,110)	1.9931	None
Nr4a2	Itga4	0.99096	50.07	0.573	rgb(223,108,109)	1.9931	None
Pou6f1	Chn1	0.99096	50.07	0.566	rgb(223,109,110)	1.9931	2,2
Rxra	Lmo7	0.99096	50.07	0.573	rgb(223,108,109)	1.9931	None
Smad3	Adam19	0.99096	50.07	0.567	rgb(223,109,110)	1.9931	None
Smad3	Col15a1	0.99096	50.07	0.569	rgb(223,108,110)	1.9931	None
Stat3	Atp2b4	0.99096	50.07	0.572	rgb(223,108,109)	1.9931	None
Stat4	a	0.99096	50.07	0.568	rgb(223,109,110)	1.9931	None
Tcf3	Cox7a2l	0.99096	50.07	0.573	rgb(223,108,109)	1.9931	None
Tcf7l1	Itgb3bp	0.99096	50.07	0.573	rgb(223,108,109)	1.9931	None
Thap3	Dpm3	0.99096	50.09	0.59	rgb(223,104,105)	1.9935	2,2
Trps1	Edn3	-0.99096	50.07	-0.57	rgb( 93,141,239)	1.9931	2,2
Zfp263	Zdhhc15	0.99096	50.07	0.565	rgb(223,109,110)	1.9931	None
Zfp280b	Wisp1	0.99096	50.07	0.566	rgb(223,109,110)	1.9931	2,2
Zfp281	Zfp395	0.99096	50.07	0.566	rgb(223,109,110)	1.9931	None
Zfp296	Nkain1	0.99096	50.07	0.573	rgb(223,108,109)	1.9931	2,2
Zfp385a	Acot1	0.99096	50.07	0.568	rgb(223,108,110)	1.9931	2,2
Zfp385a	Rnf169	0.99096	50.07	0.57	rgb(223,108,109)	1.9931	2,2
Zfp608	Gap43	0.99096	50.07	0.567	rgb(223,109,110)	1.9931	2,2
Zfp609	Chic2	-0.99096	50.07	-0.57	rgb( 94,142,239)	1.9931	2,2
Zfx	B9d1	-0.99096	50.07	-0.57	rgb( 93,142,239)	1.9931	None
Ahctf1	Gm12942	-0.9904	50.1	-0.6	rgb( 86,137,240)	1.9937	2,2
Arid5a	Rel	-0.9904	50.1	-0.6	rgb( 87,138,240)	1.9937	None
Atf3	Hdc	0.9904	50.1	0.604	rgb(224,102,103)	1.9937	2,2
Batf	Slamf9	-0.9904	50.1	-0.6	rgb( 87,138,240)	1.9937	2,2
Cbx2	Ccdc126	-0.9904	50.1	-0.6	rgb( 86,137,240)	1.9937	2,2
Creb3l2	Cyfip2	0.9904	50.1	0.603	rgb(224,102,103)	1.9937	2,2
E2f4	Txndc17	-0.9904	50.1	-0.6	rgb( 88,138,240)	1.9937	None
Ets1	Dmxl2	-0.9904	50.1	-0.6	rgb( 87,138,240)	1.9937	2,2
Fos	Rpn1	-0.9904	50.1	-0.6	rgb( 86,137,240)	1.9937	None
Fosl2	Tbc1d30	0.9904	50.1	0.603	rgb(224,102,103)	1.9937	None
Foxp1	Dgat1	-0.9904	50.1	-0.6	rgb( 87,138,240)	1.9937	2,2
Hic1	Sesn3	0.9904	50.1	0.603	rgb(224,102,103)	1.9937	None
Hsf1	Rpusd2	0.9904	50.1	0.598	rgb(224,103,104)	1.9937	None
Irf5	Gfi1	-0.9904	50.1	-0.6	rgb( 86,137,240)	1.9937	None
Klf2	Kcna3	-0.9904	50.1	-0.6	rgb( 88,138,240)	1.9937	None
Mxi1	Clybl	0.9904	50.1	0.596	rgb(224,103,104)	1.9937	2,2
Mybl1	4632434I11Rik	0.9904	50.1	0.6	rgb(224,102,104)	1.9937	2,2
Nr4a3	Dpy19l3	-0.9904	50.1	-0.6	rgb( 88,138,240)	1.9937	None
Rest	Rbm15	0.9904	50.1	0.597	rgb(224,103,104)	1.9937	None
Rreb1	Tacc2	0.9904	50.1	0.6	rgb(224,102,104)	1.9937	None
Six5	Skil	-0.9904	50.1	-0.6	rgb( 87,138,240)	1.9937	None
Sp4	Nrf1	-0.9904	50.1	-0.6	rgb( 87,138,240)	1.9937	None
Vax2	Nebl	0.9904	50.1	0.598	rgb(224,103,104)	1.9937	2,2
Whsc1	Rfwd3	0.9904	50.1	0.604	rgb(224,102,103)	1.9937	2,2
Xbp1	A430005L14Rik	-0.9904	50.1	-0.6	rgb( 86,137,240)	1.9937	None
Zfp367	Cenpm	0.9904	50.1	0.603	rgb(224,102,103)	1.9937	2,2
Zfp385a	Phlda3	0.9904	50.1	0.601	rgb(224,102,103)	1.9937	2,2
Zfp407	Mpdu1	-0.9904	50.1	-0.6	rgb( 88,138,240)	1.9937	2,2
Zfp429	Zfp874a	0.9904	50.1	0.596	rgb(224,103,104)	1.9937	2,2
Zfp467	Sspo	0.9904	50.1	0.601	rgb(224,102,103)	1.9937	2,2
Batf	Tnk2	0.98938	50.06	0.557	rgb(223,111,112)	1.9929	None
Bcl6	Enah	0.98938	50.06	0.561	rgb(223,110,111)	1.9929	2,2
Bhlhe40	Slc9a3r1	0.98938	50.06	0.558	rgb(223,110,112)	1.9929	None
Bhlhe41	Slc1a4	0.98938	50.06	0.563	rgb(223,109,111)	1.9929	2,2
Clock	Mab21l2	0.98938	50.06	0.565	rgb(223,109,110)	1.9929	2,2
Creb1	Lgals7	0.98938	50.06	0.56	rgb(223,110,111)	1.9929	None
E2f1	Anln	0.98938	50.06	0.559	rgb(223,110,111)	1.9929	None
E4f1	Egr2	0.98938	50.06	0.564	rgb(223,109,110)	1.9929	None
Eea1	Gigyf2	0.98938	50.06	0.556	rgb(223,111,112)	1.9929	2,2
Egr2	Crtam	0.98938	50.06	0.561	rgb(223,110,111)	1.9929	2,2
Egr2	Tnk2	0.98938	50.06	0.557	rgb(223,111,112)	1.9929	None
Elf1	2310015A10Rik	0.98938	50.06	0.56	rgb(223,110,111)	1.9929	None
Ets1	Rgs19	0.98938	50.06	0.565	rgb(223,109,110)	1.9929	None
Irf2	Map4k5	0.98938	50.06	0.557	rgb(223,111,112)	1.9929	None
Irf9	Gm6548	0.98938	50.06	0.564	rgb(223,109,110)	1.9929	2,2
Jazf1	Krt17	0.98938	50.06	0.564	rgb(223,109,110)	1.9929	2,2
Jund	Alpk1	0.98938	50.06	0.562	rgb(223,110,111)	1.9929	None
Jund	Cd109	0.98938	50.06	0.559	rgb(223,110,111)	1.9929	None
Klf10	Emp1	0.98938	50.06	0.563	rgb(223,109,111)	1.9929	2,2
Klf5	2018-03-09	0.98938	50.06	0.562	rgb(223,110,111)	1.9929	None
Lcor	Psme1	0.98938	50.06	0.56	rgb(223,110,111)	1.9929	None
Mbd6	Arhgap33	0.98938	50.06	0.558	rgb(223,110,112)	1.9929	2,2
Mxd1	Csrnp1	0.98938	50.06	0.559	rgb(223,110,111)	1.9929	2,2
Mxi1	Adck1	0.98938	50.06	0.564	rgb(223,109,110)	1.9929	None
Mybl1	Anln	0.98938	50.06	0.559	rgb(223,110,111)	1.9929	None
Nfe2	Sema4d	0.98938	50.06	0.562	rgb(223,110,111)	1.9929	None
Nr1d1	Apbb1ip	-0.98938	50.06	-0.56	rgb( 95,142,238)	1.9929	None
Nr1d1	Edem1	0.98938	50.06	0.556	rgb(223,111,112)	1.9929	None
Prdm1	Mpzl3	0.98938	50.06	0.559	rgb(223,110,111)	1.9929	None
Rfx3	Abi3	0.98938	50.06	0.559	rgb(223,110,111)	1.9929	2,2
Rlf	Rbms2	-0.98938	50.06	-0.56	rgb( 95,143,238)	1.9929	2,2
Sox12	Upp1	0.98938	50.06	0.556	rgb(223,111,112)	1.9929	None
Sox6	Pik3r6	0.98938	50.06	0.558	rgb(223,110,111)	1.9929	None
Sp3	Anln	0.98938	50.06	0.557	rgb(223,111,112)	1.9929	None
Sp3	Parp16	0.98938	50.06	0.56	rgb(223,110,111)	1.9929	None
Srebf1	Mxd3	0.98938	50.06	0.555	rgb(223,111,112)	1.9929	None
Stat1	Notch1	0.98938	50.06	0.558	rgb(223,110,112)	1.9929	None
Stat1	Tgtp2	0.98938	50.06	0.562	rgb(223,110,111)	1.9929	None
Stat3	Flot1	0.98938	50.06	0.558	rgb(223,110,111)	1.9929	None
Stat3	Gbp2	0.98938	50.06	0.555	rgb(223,111,112)	1.9929	None
Stat3	Reps1	-0.98938	50.06	-0.56	rgb( 96,144,238)	1.9929	2,2
Stat3	Sbno2	0.98938	50.06	0.56	rgb(223,110,111)	1.9929	None
Stat4	Bcl2	0.98938	50.06	0.562	rgb(223,110,111)	1.9929	None
Tal2	Ifitm5	0.98938	50.06	0.563	rgb(223,109,111)	1.9929	2,2
Tbx21	Wdr81	0.98938	50.06	0.563	rgb(223,109,111)	1.9929	2,2
Tet3	Cnnm3	0.98938	50.06	0.564	rgb(223,109,110)	1.9929	2,2
Zbtb7b	Zfp609	0.98938	50.06	0.562	rgb(223,110,111)	1.9929	None
Zfp111	Ccdc125	-0.98938	50.06	-0.56	rgb( 95,143,238)	1.9929	2,2
Zfp277	Amz2	0.98938	50.06	0.559	rgb(223,110,111)	1.9929	2,2
Zfp277	Exosc8	0.98938	50.06	0.556	rgb(223,111,112)	1.9929	2,2
Zfp280b	B4galt5	0.98938	50.06	0.556	rgb(223,111,112)	1.9929	2,2
Zfp280c	Rfx7	0.98938	50.06	0.555	rgb(223,111,112)	1.9929	2,2
Zfp318	Lum	-0.98938	50.06	-0.56	rgb( 95,143,238)	1.9929	2,2
Zfp358	Rnf208	0.98938	50.06	0.557	rgb(223,111,112)	1.9929	2,2
Zfp385a	Cox6b2	0.98938	50.06	0.558	rgb(223,110,112)	1.9929	2,2
Arid3b	Ccdc107	-0.98865	50.09	-0.59	rgb( 88,139,240)	1.9935	None
Atf3	Gfi1	0.98865	50.09	0.585	rgb(223,105,106)	1.9935	None
C030039L03Rik	Kcnc3	0.98865	50.09	0.587	rgb(223,105,106)	1.9935	2,2
Creb3l2	Syn1	0.98865	50.09	0.593	rgb(224,104,105)	1.9935	2,2
Ddit3	1110057K04Rik	-0.98865	50.09	-0.59	rgb( 88,139,240)	1.9935	2,2
Egr1	Ccr7	-0.98865	50.09	-0.59	rgb( 90,140,239)	1.9935	None
Elf1	Bcl2l1	-0.98865	50.09	-0.59	rgb( 89,139,239)	1.9935	None
Elf1	Cmah	0.98865	50.09	0.592	rgb(224,104,105)	1.9935	None
Elk3	Dusp14	0.98865	50.09	0.586	rgb(223,105,106)	1.9935	2,2
Erg	C920009B18Rik	-0.98865	50.09	-0.59	rgb( 90,140,239)	1.9935	None
Ets1	Coro7	0.98865	50.09	0.594	rgb(224,104,105)	1.9935	None
Etv6	Dach2	0.98865	50.09	0.589	rgb(223,105,106)	1.9935	None
Foxo1	Apbb1ip	0.98865	50.09	0.587	rgb(223,105,106)	1.9935	None
Gm14420	Gm2011	0.98865	50.09	0.593	rgb(224,104,105)	1.9935	2,2
Irf1	Rasa4	0.98865	50.09	0.591	rgb(223,104,105)	1.9935	2,2
Irf4	Dlk1	-0.98865	50.09	-0.59	rgb( 89,139,239)	1.9935	2,2
Irf5	Calhm2	0.98865	50.09	0.588	rgb(223,105,106)	1.9935	2,2
Irf7	Oas1b	0.98865	50.09	0.588	rgb(223,105,106)	1.9935	None
Irf8	Jak3	0.98865	50.09	0.591	rgb(224,104,105)	1.9935	2,2
Klf4	Gbp2	0.98865	50.09	0.586	rgb(223,105,106)	1.9935	None
L3mbtl3	Piga	-0.98865	50.09	-0.59	rgb( 89,139,239)	1.9935	2,2
Mef2d	Crebbp	0.98865	50.09	0.591	rgb(224,104,105)	1.9935	None
Mxi1	Utp20	-0.98865	50.09	-0.59	rgb( 89,139,239)	1.9935	None
Mybl1	Gen1	0.98865	50.09	0.591	rgb(224,104,105)	1.9935	2,2
Mybl1	Gtse1	0.98865	50.09	0.589	rgb(223,104,106)	1.9935	2,2
Patz1	Btbd11	0.98865	50.09	0.587	rgb(223,105,106)	1.9935	2,2
Ppard	Coro7	0.98865	50.09	0.588	rgb(223,105,106)	1.9935	None
Prrx1	Fat1	0.98865	50.09	0.591	rgb(224,104,105)	1.9935	2,2
Rbpj	4833439L19Rik	0.98865	50.09	0.588	rgb(223,105,106)	1.9935	2,2
Six5	Nckipsd	0.98865	50.09	0.588	rgb(223,105,106)	1.9935	2,2
Smad3	Tmem19	-0.98865	50.09	-0.59	rgb( 89,139,239)	1.9935	None
Tcf12	Mndal	0.98865	50.09	0.59	rgb(223,104,106)	1.9935	None
Vax2	Cysltr1	0.98865	50.09	0.589	rgb(223,105,106)	1.9935	2,2
Yy2	Acin1	0.98865	50.09	0.595	rgb(224,103,105)	1.9935	None
Zbed6	Cnot1	0.98865	50.09	0.587	rgb(223,105,106)	1.9935	2,2
Zfp184	Maoa	0.98865	50.09	0.592	rgb(224,104,105)	1.9935	2,2
Zfp263	Pter	-0.98865	50.09	-0.59	rgb( 90,140,239)	1.9935	None
Zfp808	Tyms	0.98865	50.09	0.587	rgb(223,105,106)	1.9935	2,2
Zkscan17	Cs	0.98865	50.09	0.589	rgb(223,105,106)	1.9935	2,2
Atf3	Nfil3	0.98783	50.08	0.577	rgb(223,107,108)	1.9933	None
Batf	Tmem19	-0.98783	50.08	-0.58	rgb( 90,140,239)	1.9933	None
Cebpz	Dhx33	0.98783	50.08	0.582	rgb(223,106,107)	1.9933	2,2
E2f1	Dtl	0.98783	50.08	0.581	rgb(223,106,107)	1.9933	None
Ebf1	Myo10	0.98783	50.08	0.578	rgb(223,107,108)	1.9933	None
Epas1	Adamtsl3	0.98783	50.08	0.577	rgb(223,107,108)	1.9933	2,2
Epas1	Myo6	0.98783	50.08	0.584	rgb(223,105,107)	1.9933	2,2
Ets1	Pdcd1	-0.98783	50.08	-0.58	rgb( 92,141,239)	1.9933	None
Etv4	Pdgfrb	0.98783	50.08	0.578	rgb(223,107,108)	1.9933	2,2
Foxo1	Sdc3	0.98783	50.08	0.579	rgb(223,106,108)	1.9933	2,2
Foxo1	Stap1	-0.98783	50.08	-0.58	rgb( 91,140,239)	1.9933	None
Foxp1	Xpnpep1	-0.98783	50.08	-0.58	rgb( 91,141,239)	1.9933	None
Ikzf2	Trib1	0.98783	50.08	0.578	rgb(223,107,108)	1.9933	2,2
Irf4	Abcb9	-0.98783	50.08	-0.58	rgb( 91,140,239)	1.9933	2,2
Irf4	Nrgn	-0.98783	50.08	-0.58	rgb( 90,140,239)	1.9933	None
Irf4	Peli2	0.98783	50.08	0.585	rgb(223,105,106)	1.9933	None
Irf4	Pgrmc1	-0.98783	50.08	-0.58	rgb( 91,140,239)	1.9933	None
Irf4	Vsig2	-0.98783	50.08	-0.58	rgb( 91,140,239)	1.9933	None
Irf5	Pla1a	0.98783	50.08	0.58	rgb(223,106,107)	1.9933	None
Klf3	Asap1	0.98783	50.08	0.579	rgb(223,106,108)	1.9933	None
Mxi1	Aen	-0.98783	50.08	-0.58	rgb( 90,140,239)	1.9933	None
Nr4a2	Arhgap26	-0.98783	50.08	-0.58	rgb( 90,140,239)	1.9933	None
Phf1	Galk1	-0.98783	50.08	-0.58	rgb( 92,141,239)	1.9933	2,2
Pknox1	Got1	-0.98783	50.08	-0.58	rgb( 91,140,239)	1.9933	2,2
Runx2	Gzmb	0.98783	50.08	0.579	rgb(223,106,108)	1.9933	None
Rxra	Bcam	0.98783	50.08	0.584	rgb(223,105,107)	1.9933	None
Sp2	Arhgap33	0.98783	50.08	0.576	rgb(223,107,108)	1.9933	None
Sp2	Fbxo18	-0.98783	50.08	-0.58	rgb( 92,141,239)	1.9933	None
Sp2	Gm12942	-0.98783	50.08	-0.58	rgb( 92,141,239)	1.9933	None
Sp3	Lgals1	-0.98783	50.08	-0.58	rgb( 91,140,239)	1.9933	None
Sp3	Papolg	0.98783	50.08	0.577	rgb(223,107,108)	1.9933	None
Sp4	Fbxw2	0.98783	50.08	0.581	rgb(223,106,107)	1.9933	2,2
Sp4	H2afx	-0.98783	50.08	-0.58	rgb( 90,140,239)	1.9933	None
Sp4	Srsf12	0.98783	50.08	0.581	rgb(223,106,107)	1.9933	2,2
Xbp1	Gemin6	-0.98783	50.08	-0.58	rgb( 92,141,239)	1.9933	2,2
Xbp1	Gpatch4	-0.98783	50.08	-0.58	rgb( 90,140,239)	1.9933	2,2
Zbtb17	Cln5	-0.98783	50.08	-0.58	rgb( 91,140,239)	1.9933	2,2
Zbtb7a	Sec14l1	0.98783	50.08	0.582	rgb(223,106,107)	1.9933	None
Zfp148	Adam10	0.98783	50.08	0.584	rgb(223,105,107)	1.9933	None
Zfp329	Neat1	0.98783	50.08	0.581	rgb(223,106,107)	1.9933	2,2
Zfp516	B4galnt4	0.98783	50.08	0.577	rgb(223,107,108)	1.9933	2,2
Zfp750	Robo3	0.98783	50.08	0.576	rgb(223,107,108)	1.9933	2,2
Zfp960	Ifi204	0.98783	50.08	0.585	rgb(223,105,106)	1.9933	2,2
Zhx2	Flt3l	-0.98783	50.08	-0.58	rgb( 92,141,239)	1.9933	2,2
Ascl2	Itga4	0.98681	50.05	0.547	rgb(223,113,114)	1.9927	None
Bcl6	Myof	0.98681	50.05	0.547	rgb(223,113,114)	1.9927	None
Cenpb	Chl1	0.98681	50.05	0.551	rgb(223,112,113)	1.9927	None
Dzip1	Casr	-0.98681	50.05	-0.55	rgb( 97,144,238)	1.9927	2,2
E4f1	Rel	0.98681	50.05	0.554	rgb(223,111,112)	1.9927	None
Egr1	Kcnq4	0.98681	50.05	0.553	rgb(223,111,113)	1.9927	None
Egr1	Map3k1	-0.98681	50.05	-0.55	rgb( 98,145,238)	1.9927	None
Egr1	Mex3a	0.98681	50.05	0.555	rgb(223,111,112)	1.9927	None
Egr4	Slc38a1	0.98681	50.05	0.545	rgb(223,113,114)	1.9927	None
Foxo1	Fam3c	0.98681	50.05	0.555	rgb(223,111,112)	1.9927	None
Gfi1	Haao	0.98681	50.05	0.552	rgb(223,111,113)	1.9927	None
Hbp1	Ipmk	-0.98681	50.05	-0.55	rgb( 98,144,238)	1.9927	None
Hic1	Ccrn4l	0.98681	50.05	0.547	rgb(223,113,114)	1.9927	2,2
Hif3a	Sdcbp2	0.98681	50.05	0.555	rgb(223,111,112)	1.9927	None
Hmgb1	AI506816	0.98681	50.05	0.546	rgb(223,113,114)	1.9927	2,2
Mga	Tgm2	0.98681	50.05	0.549	rgb(223,112,113)	1.9927	None
Mxd1	Igfbp4	0.98681	50.05	0.549	rgb(223,112,113)	1.9927	2,2
Mxi1	Mecr	0.98681	50.05	0.55	rgb(223,112,113)	1.9927	2,2
Mybl1	Fut7	0.98681	50.05	0.547	rgb(223,112,114)	1.9927	2,2
Myt1l	Atad2b	0.98681	50.05	0.553	rgb(223,111,113)	1.9927	None
Nkx3-1	Sesn1	0.98681	50.05	0.555	rgb(223,111,112)	1.9927	None
Nr3c2	Itga3	0.98681	50.05	0.551	rgb(223,112,113)	1.9927	None
Nr4a2	Gja1	-0.98681	50.05	-0.55	rgb( 99,145,238)	1.9927	2,2
Pcgf2	Bmyc	0.98681	50.05	0.546	rgb(223,113,114)	1.9927	2,2
Pou2f2	Zbp1	0.98681	50.05	0.548	rgb(223,112,113)	1.9927	None
Prdm16	Flna	0.98681	50.05	0.546	rgb(223,113,114)	1.9927	2,2
Prox1	Lgr4	0.98681	50.05	0.551	rgb(223,112,113)	1.9927	None
Rela	Cisd3	0.98681	50.05	0.551	rgb(223,112,113)	1.9927	None
Rela	Tnk2	-0.98681	50.05	-0.55	rgb( 98,145,238)	1.9927	None
Rest	Gys1	0.98681	50.05	0.55	rgb(223,112,113)	1.9927	None
Rxra	Nrcam	0.98681	50.05	0.554	rgb(223,111,112)	1.9927	2,2
Rxrb	Socs2	-0.98681	50.05	-0.55	rgb( 98,144,238)	1.9927	2,2
Sall3	Cd2	-0.98681	50.05	-0.55	rgb( 98,145,238)	1.9927	2,2
Satb1	Id2	0.98681	50.05	0.547	rgb(223,112,114)	1.9927	2,2
Six4	Gap43	0.98681	50.05	0.552	rgb(223,112,113)	1.9927	None
Skil	Zbtb4	0.98681	50.05	0.551	rgb(223,112,113)	1.9927	2,2
Sp140	Map4k5	-0.98681	50.05	-0.55	rgb( 97,144,238)	1.9927	2,2
Sp2	Sez6l2	-0.98681	50.05	-0.55	rgb( 99,145,238)	1.9927	None
Stat1	Cpox	0.98681	50.05	0.547	rgb(223,112,114)	1.9927	None
Stat3	Tnip2	0.98681	50.05	0.548	rgb(223,112,114)	1.9927	None
Stat5b	Fam111a	-0.98681	50.05	-0.55	rgb( 98,145,238)	1.9927	2,2
Tal2	Batf	-0.98681	50.05	-0.55	rgb( 98,145,238)	1.9927	2,2
Tal2	Tmem19	0.98681	50.05	0.55	rgb(223,112,113)	1.9927	2,2
Tet2	Gprin3	0.98681	50.05	0.55	rgb(223,112,113)	1.9927	2,2
Trp73	Exoc4	0.98681	50.05	0.553	rgb(223,111,112)	1.9927	None
Trps1	Fam198a	-0.98681	50.05	-0.55	rgb( 98,145,238)	1.9927	2,2
Zbtb7b	Cln6	0.98681	50.05	0.553	rgb(223,111,113)	1.9927	None
Zeb2	Abcb4	0.98681	50.05	0.551	rgb(223,112,113)	1.9927	2,2
Zfhx2	Tyms	-0.98681	50.05	-0.55	rgb( 98,144,238)	1.9927	2,2
Zfhx3	Fam20c	0.98681	50.05	0.546	rgb(223,113,114)	1.9927	2,2
Zfp260	Adarb1	-0.98681	50.05	-0.55	rgb( 97,144,238)	1.9927	2,2
Zfp580	Psmd8	0.98681	50.05	0.549	rgb(223,112,113)	1.9927	2,2
Zfp827	H2-Eb2	0.98681	50.05	0.547	rgb(223,112,114)	1.9927	2,2
Zfp831	Inpp4a	0.98681	50.05	0.549	rgb(223,112,113)	1.9927	2,2
Zscan10	Dctn4	-0.98681	50.05	-0.55	rgb( 97,144,238)	1.9927	None
Ahr	Ccno	0.9858	50.07	0.575	rgb(223,107,108)	1.9931	None
Bcl6	Hk1	-0.9858	50.07	-0.57	rgb( 93,141,239)	1.9931	None
Bhlhe40	Tnip3	0.9858	50.07	0.574	rgb(223,107,108)	1.9931	2,2
C030039L03Rik	Nphp3	0.9858	50.07	0.569	rgb(223,108,109)	1.9931	2,2
Cebpg	Atp6v0a1	-0.9858	50.07	-0.57	rgb( 93,142,239)	1.9931	2,2
E2f4	Lrp8	0.9858	50.07	0.573	rgb(223,108,109)	1.9931	None
Ebf1	Bend3	-0.9858	50.07	-0.57	rgb( 93,141,239)	1.9931	None
Elf1	Rnf125	0.9858	50.07	0.566	rgb(223,109,110)	1.9931	None
Elk4	Tacc1	0.9858	50.07	0.575	rgb(223,107,108)	1.9931	2,2
Ets1	Aste1	-0.9858	50.07	-0.57	rgb( 94,142,239)	1.9931	None
Etv4	Slc6a9	0.9858	50.07	0.573	rgb(223,108,109)	1.9931	2,2
Fos	Plxnc1	0.9858	50.07	0.574	rgb(223,107,108)	1.9931	None
Fosl2	Chd7	0.9858	50.07	0.566	rgb(223,109,110)	1.9931	None
Foxo1	Mtss1	0.9858	50.07	0.566	rgb(223,109,110)	1.9931	None
Foxp1	5430421N21Rik	-0.9858	50.07	-0.57	rgb( 94,142,239)	1.9931	2,2
Gata3	Ipmk	-0.9858	50.07	-0.57	rgb( 94,142,239)	1.9931	None
Hbp1	Dpf1	-0.9858	50.07	-0.57	rgb( 93,142,239)	1.9931	None
Hbp1	Ifnar1	0.9858	50.07	0.565	rgb(223,109,110)	1.9931	None
Hsf1	Mgst3	-0.9858	50.07	-0.57	rgb( 94,142,238)	1.9931	None
Ikzf2	Cd96	0.9858	50.07	0.567	rgb(223,109,110)	1.9931	2,2
Irf4	Atp8b4	-0.9858	50.07	-0.57	rgb( 94,142,239)	1.9931	None
Irf4	Col18a1	0.9858	50.07	0.57	rgb(223,108,109)	1.9931	None
Irf5	Dcxr	0.9858	50.07	0.574	rgb(223,107,108)	1.9931	2,2
Irf8	Il2rb	0.9858	50.07	0.566	rgb(223,109,110)	1.9931	None
Jun	Src	0.9858	50.07	0.566	rgb(223,109,110)	1.9931	None
Jund	Socs1	0.9858	50.07	0.566	rgb(223,109,110)	1.9931	None
Kdm2b	Slco4a1	0.9858	50.07	0.575	rgb(223,107,108)	1.9931	2,2
Klf6	Chst3	-0.9858	50.07	-0.57	rgb( 94,142,239)	1.9931	2,2
Lyl1	Lix1l	0.9858	50.07	0.571	rgb(223,108,109)	1.9931	None
Maf	Tex261	0.9858	50.07	0.571	rgb(223,108,109)	1.9931	None
Nfatc1	Synpo	0.9858	50.07	0.569	rgb(223,108,109)	1.9931	None
Nfatc4	Gpr153	0.9858	50.07	0.566	rgb(223,109,110)	1.9931	2,2
Nr3c1	Tnfsf9	-0.9858	50.07	-0.57	rgb( 94,142,239)	1.9931	None
Nr4a2	Gpr65	0.9858	50.07	0.57	rgb(223,108,109)	1.9931	None
Patz1	Mboat7	0.9858	50.07	0.57	rgb(223,108,109)	1.9931	2,2
Plagl1	Slc7a1	0.9858	50.07	0.57	rgb(223,108,109)	1.9931	2,2
Rxra	Smek1	0.9858	50.07	0.57	rgb(223,108,109)	1.9931	None
Sgsm2	Tg	0.9858	50.07	0.572	rgb(223,108,109)	1.9931	2,2
Sgsm2	Unc93b1	0.9858	50.07	0.574	rgb(223,107,108)	1.9931	2,2
Smad3	Ifi27l2a	-0.9858	50.07	-0.57	rgb( 94,142,239)	1.9931	None
Sp3	Cnnm4	0.9858	50.07	0.573	rgb(223,108,109)	1.9931	None
Sp4	Rcl1	-0.9858	50.07	-0.57	rgb( 94,142,239)	1.9931	None
Sp4	Zeb1	0.9858	50.07	0.567	rgb(223,109,110)	1.9931	None
Srebf1	Hmgcr	0.9858	50.07	0.567	rgb(223,109,110)	1.9931	None
Srebf1	Wdr81	0.9858	50.07	0.569	rgb(223,108,109)	1.9931	None
Stat1	Slain1	0.9858	50.07	0.569	rgb(223,108,109)	1.9931	None
Tead1	Fut7	0.9858	50.07	0.575	rgb(223,107,108)	1.9931	2,2
Twist1	Adap1	-0.9858	50.07	-0.57	rgb( 94,142,238)	1.9931	None
Vax2	Adcy4	0.9858	50.07	0.571	rgb(223,108,109)	1.9931	2,2
Zeb2	Exoc2	0.9858	50.07	0.575	rgb(223,107,108)	1.9931	2,2
Zfhx3	Ermp1	0.9858	50.07	0.574	rgb(223,107,109)	1.9931	2,2
Zfp467	Galm	0.9858	50.07	0.571	rgb(223,108,109)	1.9931	2,2
Zfp606	Ripk1	-0.9858	50.07	-0.57	rgb( 92,141,239)	1.9931	2,2
Zfp870	1700030K09Rik	0.9858	50.07	0.568	rgb(223,108,110)	1.9931	2,2
Akna	Ms4a6c	0.9844	50.04	0.541	rgb(223,114,115)	1.9925	2,2
Atmin	Gramd1b	0.9844	50.04	0.542	rgb(223,114,115)	1.9925	2,2
Bcl6	Bcl2l11	-0.9844	50.04	-0.54	rgb(100,146,238)	1.9925	None
Bhlhe41	Vldlr	0.9844	50.04	0.542	rgb(223,114,115)	1.9925	None
Casz1	Prss50	0.9844	50.04	0.541	rgb(223,114,115)	1.9925	2,2
Cxxc5	Rasgef1a	0.9844	50.04	0.544	rgb(223,113,114)	1.9925	2,2
E2f1	Nfatc2	0.9844	50.04	0.54	rgb(223,114,115)	1.9925	None
Egr2	Mmd	0.9844	50.04	0.539	rgb(223,114,115)	1.9925	2,2
Egr2	Riok3	-0.9844	50.04	-0.54	rgb(100,146,237)	1.9925	2,2
Elk3	Wdr1	0.9844	50.04	0.539	rgb(223,114,115)	1.9925	None
Ets1	Srgap3	0.9844	50.04	0.537	rgb(223,114,115)	1.9925	None
Foxh1	Fbxo2	0.9844	50.04	0.536	rgb(223,115,116)	1.9925	None
Foxj1	Abhd4	0.9844	50.04	0.544	rgb(223,113,114)	1.9925	2,2
Foxp2	Dio2	0.9844	50.04	0.545	rgb(223,113,114)	1.9925	2,2
Hes1	Gart	0.9844	50.04	0.542	rgb(223,114,115)	1.9925	None
Irf2	Aff3	0.9844	50.04	0.536	rgb(223,115,116)	1.9925	None
Irf2	Tgtp2	0.9844	50.04	0.543	rgb(223,113,114)	1.9925	None
Irf7	Lin54	0.9844	50.04	0.539	rgb(223,114,115)	1.9925	None
Irf7	Ncoa7	0.9844	50.04	0.535	rgb(223,115,116)	1.9925	None
Irf9	Ifit2	0.9844	50.04	0.543	rgb(223,113,114)	1.9925	2,2
Klf5	Hmgn1	-0.9844	50.04	-0.54	rgb( 99,145,238)	1.9925	None
Lcor	Ndufv3	0.9844	50.04	0.544	rgb(223,113,114)	1.9925	None
Lin54	Mex3b	0.9844	50.04	0.545	rgb(223,113,114)	1.9925	2,2
Mga	Il12rb2	0.9844	50.04	0.539	rgb(223,114,115)	1.9925	None
Mxd1	Anapc1	-0.9844	50.04	-0.54	rgb(101,146,237)	1.9925	2,2
Myb	Ccrn4l	0.9844	50.04	0.54	rgb(223,114,115)	1.9925	2,2
Myc	Icam5	0.9844	50.04	0.537	rgb(223,115,116)	1.9925	None
Nacc2	Acsl5	-0.9844	50.04	-0.54	rgb(101,146,237)	1.9925	2,2
Ncoa1	Afap1	0.9844	50.04	0.544	rgb(223,113,114)	1.9925	2,2
Nfkb2	Lif	0.9844	50.04	0.538	rgb(223,114,115)	1.9925	None
Nr4a3	Ckap4	0.9844	50.04	0.544	rgb(223,113,114)	1.9925	2,2
Pou2af1	Cstf2t	0.9844	50.04	0.541	rgb(223,114,115)	1.9925	2,2
Prdm8	Spin4	0.9844	50.04	0.543	rgb(223,113,114)	1.9925	2,2
Rfx1	Faim3	0.9844	50.04	0.536	rgb(223,115,116)	1.9925	2,2
Rfx3	Atp2b4	0.9844	50.04	0.541	rgb(223,114,115)	1.9925	None
Rfx3	Trim2	-0.9844	50.04	-0.54	rgb(100,146,237)	1.9925	None
Rxra	Creb5	0.9844	50.04	0.544	rgb(223,113,114)	1.9925	None
Satb1	Ramp3	0.9844	50.04	0.536	rgb(223,115,116)	1.9925	2,2
Six1	Mtss1l	-0.9844	50.04	-0.54	rgb(100,146,238)	1.9925	2,2
Smad3	Celf2	-0.9844	50.04	-0.54	rgb(100,146,237)	1.9925	None
Sp4	Vsig10	0.9844	50.04	0.54	rgb(223,114,115)	1.9925	None
Srf	Klf13	0.9844	50.04	0.542	rgb(223,113,115)	1.9925	None
Stat2	Zbp1	0.9844	50.04	0.544	rgb(223,113,114)	1.9925	None
Stat4	Pla2g12a	0.9844	50.04	0.537	rgb(223,114,115)	1.9925	None
Stat5b	Gadd45g	0.9844	50.04	0.537	rgb(223,114,115)	1.9925	2,2
Tcf4	Pde4a	0.9844	50.04	0.545	rgb(223,113,114)	1.9925	None
Trp53	Bbc3	0.9844	50.04	0.541	rgb(223,114,115)	1.9925	None
Trp73	Psrc1	0.9844	50.04	0.537	rgb(223,114,115)	1.9925	2,2
Xbp1	Hist1h1b	0.9844	50.04	0.542	rgb(223,113,114)	1.9925	None
Zbed6	Zfp445	0.9844	50.04	0.544	rgb(223,113,114)	1.9925	2,2
Zbtb17	Ascc1	-0.9844	50.04	-0.54	rgb(100,146,238)	1.9925	2,2
Zbtb26	Stk39	-0.9844	50.04	-0.54	rgb(100,146,237)	1.9925	2,2
Zbtb33	Dnajc21	0.9844	50.04	0.541	rgb(223,114,115)	1.9925	2,2
Zbtb4	2900011O08Rik	0.9844	50.04	0.538	rgb(223,114,115)	1.9925	None
Zbtb7b	Prrt2	0.9844	50.04	0.536	rgb(223,115,116)	1.9925	None
Zeb2	Crtam	0.9844	50.04	0.541	rgb(223,114,115)	1.9925	2,2
Zfhx3	Rfx7	0.9844	50.04	0.539	rgb(223,114,115)	1.9925	2,2
Zfp120	Asnsd1	0.9844	50.04	0.542	rgb(223,113,115)	1.9925	2,2
Zfp182	Rps6ka3	0.9844	50.04	0.537	rgb(223,114,115)	1.9925	None
Zfp202	Rfwd3	-0.9844	50.04	-0.54	rgb(100,146,237)	1.9925	2,2
Zfp266	Cdk6	0.9844	50.04	0.536	rgb(223,115,116)	1.9925	2,2
Zfp280b	Cxcr6	-0.9844	50.04	-0.54	rgb( 99,145,238)	1.9925	2,2
Zfp280b	Ptk2	-0.9844	50.04	-0.54	rgb(101,146,237)	1.9925	2,2
Zfp280b	Tpd52	-0.9844	50.04	-0.54	rgb(101,146,237)	1.9925	2,2
Zfp362	Foxp4	0.9844	50.04	0.538	rgb(223,114,115)	1.9925	2,2
Zfp398	Snx19	0.9844	50.04	0.536	rgb(223,115,116)	1.9925	2,2
Zfp526	Gyk	-0.9844	50.04	-0.54	rgb( 99,145,238)	1.9925	2,2
Zfp629	Qprt	-0.9844	50.04	-0.54	rgb(101,146,237)	1.9925	2,2
Zfp64	Fbxw2	-0.9844	50.04	-0.54	rgb( 99,145,238)	1.9925	2,2
Zfp668	Crtc1	0.9844	50.04	0.535	rgb(223,115,116)	1.9925	2,2
Zfp868	Bcam	-0.9844	50.04	-0.54	rgb(100,146,237)	1.9925	2,2
Zfp90	Myo1f	0.9844	50.04	0.544	rgb(223,113,114)	1.9925	2,2
Zhx2	Bmyc	0.9844	50.04	0.539	rgb(223,114,115)	1.9925	2,2
Zscan10	Apbb1ip	0.9844	50.04	0.541	rgb(223,114,115)	1.9925	None
Zscan10	Vegfb	0.9844	50.04	0.539	rgb(223,114,115)	1.9925	None
Ahctf1	Polr3gl	-0.98327	50.06	-0.56	rgb( 95,143,238)	1.9929	2,2
Batf	Tex14	-0.98327	50.06	-0.56	rgb( 95,143,238)	1.9929	None
Batf3	Il18	0.98327	50.06	0.564	rgb(223,109,110)	1.9929	None
Bbx	Exoc4	0.98327	50.06	0.557	rgb(223,111,112)	1.9929	None
Bcl6	3110057O12Rik	-0.98327	50.06	-0.56	rgb( 95,143,238)	1.9929	2,2
Cebpg	Trib3	0.98327	50.06	0.56	rgb(223,110,111)	1.9929	2,2
Creb3l2	Egr3	-0.98327	50.06	-0.56	rgb( 95,143,238)	1.9929	2,2
Deaf1	Acin1	0.98327	50.06	0.563	rgb(223,109,111)	1.9929	None
Eea1	Ctsw	-0.98327	50.06	-0.56	rgb( 96,143,238)	1.9929	2,2
Egr3	Surf4	-0.98327	50.06	-0.56	rgb( 95,143,238)	1.9929	None
Elf1	Kdm2b	0.98327	50.06	0.562	rgb(223,110,111)	1.9929	None
Epas1	Satb1	0.98327	50.06	0.556	rgb(223,111,112)	1.9929	None
Etv6	Tesk2	-0.98327	50.06	-0.56	rgb( 96,144,238)	1.9929	None
Fbxl19	Ptprs	0.98327	50.06	0.562	rgb(223,110,111)	1.9929	2,2
Fli1	Slc9a8	-0.98327	50.06	-0.56	rgb( 95,143,238)	1.9929	None
Gata3	Samsn1	0.98327	50.06	0.562	rgb(223,110,111)	1.9929	None
Hic1	Pld2	0.98327	50.06	0.563	rgb(223,109,111)	1.9929	None
Hif3a	Zfp395	0.98327	50.06	0.556	rgb(223,111,112)	1.9929	2,2
Ikzf4	Gpr146	0.98327	50.06	0.556	rgb(223,111,112)	1.9929	2,2
Irf2	Ecm1	0.98327	50.06	0.56	rgb(223,110,111)	1.9929	2,2
Irf2	Ms4a6c	0.98327	50.06	0.558	rgb(223,110,111)	1.9929	None
Irf4	Cacna1s	0.98327	50.06	0.56	rgb(223,110,111)	1.9929	2,2
Irf5	Fbxo18	0.98327	50.06	0.563	rgb(223,110,111)	1.9929	2,2
Irf7	Cxcl10	0.98327	50.06	0.564	rgb(223,109,110)	1.9929	None
Irf7	Epsti1	0.98327	50.06	0.564	rgb(223,109,110)	1.9929	None
Jazf1	Mid2	0.98327	50.06	0.563	rgb(223,110,111)	1.9929	2,2
Klf13	Prr7	0.98327	50.06	0.558	rgb(223,110,112)	1.9929	2,2
Maff	Egln3	0.98327	50.06	0.56	rgb(223,110,111)	1.9929	None
Msc	Lime1	0.98327	50.06	0.56	rgb(223,110,111)	1.9929	2,2
Mxd4	Tcp11l2	0.98327	50.06	0.563	rgb(223,109,111)	1.9929	2,2
Mxi1	Rcl1	-0.98327	50.06	-0.56	rgb( 96,143,238)	1.9929	None
Myb	Tmem120b	0.98327	50.06	0.564	rgb(223,109,110)	1.9929	2,2
Nfatc4	Fbxo2	0.98327	50.06	0.556	rgb(223,111,112)	1.9929	None
Patz1	Reps1	0.98327	50.06	0.56	rgb(223,110,111)	1.9929	2,2
Pparg	Dgkk	0.98327	50.06	0.562	rgb(223,110,111)	1.9929	2,2
Rest	Jak3	0.98327	50.06	0.558	rgb(223,110,112)	1.9929	None
Scrt1	Slc41a2	0.98327	50.06	0.561	rgb(223,110,111)	1.9929	2,2
Sgsm2	Plxnc1	0.98327	50.06	0.561	rgb(223,110,111)	1.9929	2,2
Six5	Zfp324	0.98327	50.06	0.556	rgb(223,111,112)	1.9929	None
Sox5	Serpinf1	0.98327	50.06	0.563	rgb(223,109,111)	1.9929	2,2
Sp2	Slc9a8	0.98327	50.06	0.555	rgb(223,111,112)	1.9929	None
Sp2	Smpd4	0.98327	50.06	0.561	rgb(223,110,111)	1.9929	None
Sp3	Vdac1	-0.98327	50.06	-0.56	rgb( 96,143,238)	1.9929	None
Sp4	Ccdc134	-0.98327	50.06	-0.56	rgb( 96,144,238)	1.9929	None
Sp4	Gart	-0.98327	50.06	-0.56	rgb( 95,142,238)	1.9929	None
Sp4	Pex19	-0.98327	50.06	-0.56	rgb( 95,143,238)	1.9929	None
Stat1	Icam1	0.98327	50.06	0.564	rgb(223,109,110)	1.9929	None
Stat4	Sema4c	0.98327	50.06	0.558	rgb(223,110,112)	1.9929	2,2
Tcf3	Acvr1b	0.98327	50.06	0.564	rgb(223,109,110)	1.9929	None
Tcf7l1	Gstm1	0.98327	50.06	0.555	rgb(223,111,112)	1.9929	None
Thap3	Cox7a2l	0.98327	50.06	0.559	rgb(223,110,111)	1.9929	2,2
Thra	Mex3d	0.98327	50.06	0.559	rgb(223,110,111)	1.9929	2,2
Twist1	Fam160a1	0.98327	50.06	0.559	rgb(223,110,111)	1.9929	2,2
Vax2	Myo1f	0.98327	50.06	0.562	rgb(223,110,111)	1.9929	2,2
Zfhx3	Akap2	0.98327	50.06	0.561	rgb(223,110,111)	1.9929	2,2
Zfhx3	Zfp362	0.98327	50.06	0.556	rgb(223,111,112)	1.9929	None
Zfp276	Trappc10	0.98327	50.06	0.565	rgb(223,109,110)	1.9929	2,2
Zfp386	Atp6v1d	0.98327	50.06	0.556	rgb(223,111,112)	1.9929	2,2
Zfp386	Spry1	-0.98327	50.06	-0.56	rgb( 96,144,238)	1.9929	2,2
Zfp777	Zc3h7b	0.98327	50.06	0.558	rgb(223,110,112)	1.9929	2,2
Zik1	Mvp	-0.98327	50.06	-0.56	rgb( 96,143,238)	1.9929	2,2
Aebp2	Pgrmc1	-0.98193	50.03	-0.53	rgb(102,147,237)	1.9923	2,2
Aebp2	Rora	0.98193	50.03	0.533	rgb(223,115,116)	1.9923	2,2
Ascl4	Zcchc12	0.98193	50.03	0.525	rgb(223,117,118)	1.9923	2,2
Atf2	Gltscr2	0.98193	50.03	0.529	rgb(223,116,117)	1.9923	None
Atf3	Cmtm4	0.98193	50.03	0.532	rgb(223,115,116)	1.9923	None
Bcl11b	Dmd	0.98193	50.03	0.525	rgb(223,117,118)	1.9923	2,2
Bcl11b	Tg	0.98193	50.03	0.533	rgb(223,115,116)	1.9923	None
Cebpb	Cdkn2d	0.98193	50.03	0.53	rgb(223,116,117)	1.9923	None
Cebpg	Crtc1	-0.98193	50.03	-0.53	rgb(103,148,237)	1.9923	2,2
Cic	Il9	0.98193	50.03	0.533	rgb(223,115,116)	1.9923	None
Cic	Phldb2	0.98193	50.03	0.533	rgb(223,115,116)	1.9923	None
Csrnp1	Gm6225	0.98193	50.03	0.527	rgb(223,116,117)	1.9923	2,2
Cxxc5	Mcoln3	0.98193	50.03	0.533	rgb(223,115,116)	1.9923	2,2
Drap1	Sepw1	0.98193	50.03	0.532	rgb(223,115,116)	1.9923	2,2
E2f4	Parp6	-0.98193	50.03	-0.53	rgb(101,147,237)	1.9923	None
E4f1	Nr4a3	0.98193	50.03	0.53	rgb(223,116,117)	1.9923	None
Foxa1	Ermn	0.98193	50.03	0.527	rgb(223,116,117)	1.9923	None
Foxc1	Prss30	-0.98193	50.03	-0.53	rgb(102,147,237)	1.9923	None
Foxj1	Mfge8	0.98193	50.03	0.535	rgb(223,115,116)	1.9923	2,2
Foxo1	Vrk2	0.98193	50.03	0.53	rgb(223,116,117)	1.9923	None
Foxp2	Slc6a6	0.98193	50.03	0.528	rgb(223,116,117)	1.9923	2,2
Gata1	Pfas	-0.98193	50.03	-0.53	rgb(101,147,237)	1.9923	None
Hbp1	Clcnkb	0.98193	50.03	0.533	rgb(223,115,116)	1.9923	2,2
Hif1a	Rassf1	0.98193	50.03	0.525	rgb(223,117,118)	1.9923	2,2
Hif1a	Rnf113a1	0.98193	50.03	0.526	rgb(223,117,118)	1.9923	2,2
Ikzf5	Mex3a	0.98193	50.03	0.525	rgb(223,117,118)	1.9923	2,2
Jdp2	Lrrc24	0.98193	50.03	0.527	rgb(223,116,117)	1.9923	None
Klf13	Ndst1	-0.98193	50.03	-0.53	rgb(102,147,237)	1.9923	None
Klf4	Lgals1	0.98193	50.03	0.527	rgb(223,116,117)	1.9923	None
Mafg	Fyn	0.98193	50.03	0.53	rgb(223,116,117)	1.9923	None
Meis2	Ncoa2	0.98193	50.03	0.527	rgb(223,116,117)	1.9923	None
Msx2	Tnfrsf25	0.98193	50.03	0.527	rgb(223,116,117)	1.9923	None
Mtf2	Yy2	0.98193	50.03	0.535	rgb(223,115,116)	1.9923	2,2
Mybl1	Casz1	-0.98193	50.03	-0.53	rgb(102,147,237)	1.9923	2,2
Npas4	Stac2	0.98193	50.03	0.533	rgb(223,115,116)	1.9923	None
Nr1d1	Inpp5b	0.98193	50.03	0.525	rgb(223,117,118)	1.9923	2,2
Nr4a3	Asb2	0.98193	50.03	0.532	rgb(223,115,116)	1.9923	None
Ppara	L1cam	0.98193	50.03	0.527	rgb(223,116,117)	1.9923	2,2
Rora	Ndst1	0.98193	50.03	0.53	rgb(223,116,117)	1.9923	2,2
Rora	Zbtb4	0.98193	50.03	0.532	rgb(223,115,117)	1.9923	None
Rreb1	Mndal	0.98193	50.03	0.529	rgb(223,116,117)	1.9923	None
Rxra	Fam196a	0.98193	50.03	0.533	rgb(223,115,116)	1.9923	2,2
Rxrb	Prf1	0.98193	50.03	0.526	rgb(223,116,118)	1.9923	2,2
Satb1	Oxct1	-0.98193	50.03	-0.53	rgb(103,148,237)	1.9923	2,2
Sox13	Aqp9	-0.98193	50.03	-0.53	rgb(101,147,237)	1.9923	2,2
Sox4	Smarca2	0.98193	50.03	0.534	rgb(223,115,116)	1.9923	None
Sp3	Ppm1j	0.98193	50.03	0.525	rgb(223,117,118)	1.9923	None
Srf	Sertad1	0.98193	50.03	0.528	rgb(223,116,117)	1.9923	2,2
Stat1	Lgals3bp	0.98193	50.03	0.532	rgb(223,115,116)	1.9923	None
Stat3	Epas1	-0.98193	50.03	-0.53	rgb(101,146,237)	1.9923	2,2
Stat3	Hook2	0.98193	50.03	0.53	rgb(223,116,117)	1.9923	None
Stat3	Il21	0.98193	50.03	0.534	rgb(223,115,116)	1.9923	None
Stat3	St8sia6	-0.98193	50.03	-0.53	rgb(101,147,237)	1.9923	None
Stat4	Cdk6	0.98193	50.03	0.53	rgb(223,116,117)	1.9923	None
Tcf12	Dock3	0.98193	50.03	0.532	rgb(223,115,116)	1.9923	None
Tead1	Il6	-0.98193	50.03	-0.53	rgb(101,146,237)	1.9923	2,2
Tead1	Ptprc	0.98193	50.03	0.529	rgb(223,116,117)	1.9923	None
Tet1	Syt7	0.98193	50.03	0.527	rgb(223,116,117)	1.9923	2,2
Tmf1	Pik3ca	0.98193	50.03	0.529	rgb(223,116,117)	1.9923	2,2
Trp53	Gne	0.98193	50.03	0.534	rgb(223,115,116)	1.9923	None
Zbtb46	Cd70	0.98193	50.03	0.535	rgb(223,115,116)	1.9923	2,2
Zbtb46	Scin	0.98193	50.03	0.531	rgb(223,116,117)	1.9923	2,2
Zeb1	Vax2	-0.98193	50.03	-0.53	rgb(102,147,237)	1.9923	2,2
Zeb2	Ptger2	0.98193	50.03	0.525	rgb(223,117,118)	1.9923	2,2
Zfp184	Fkbp11	0.98193	50.03	0.526	rgb(223,117,118)	1.9923	2,2
Zfp629	Lrp12	0.98193	50.03	0.53	rgb(223,116,117)	1.9923	2,2
Zfp629	Zfp108	0.98193	50.03	0.533	rgb(223,115,116)	1.9923	2,2
Zfp711	Lrp11	0.98193	50.03	0.533	rgb(223,115,116)	1.9923	None
Zfp750	Ppp1r10	0.98193	50.03	0.529	rgb(223,116,117)	1.9923	2,2
Zfp870	Pms1	0.98193	50.03	0.533	rgb(223,115,116)	1.9923	2,2
Zfpm1	Fgr	0.98193	50.03	0.526	rgb(223,116,118)	1.9923	2,2
Zfx	Casp6	-0.98193	50.03	-0.53	rgb(101,147,237)	1.9923	None
Arid3a	Scml4	-0.98075	50.05	-0.55	rgb( 98,144,238)	1.9927	None
Arid3a	Slco3a1	0.98075	50.05	0.548	rgb(223,112,113)	1.9927	None
Cebpg	Gpt2	0.98075	50.05	0.547	rgb(223,113,114)	1.9927	2,2
Crem	Agpat9	0.98075	50.05	0.553	rgb(223,111,113)	1.9927	2,2
Egr2	Ergic1	-0.98075	50.05	-0.55	rgb( 98,144,238)	1.9927	None
Elf1	Fam160b1	0.98075	50.05	0.548	rgb(223,112,113)	1.9927	None
Epas1	Cnnm1	0.98075	50.05	0.548	rgb(223,112,113)	1.9927	2,2
Ets1	Ltb	0.98075	50.05	0.547	rgb(223,112,114)	1.9927	None
Fosl2	Lrmp	-0.98075	50.05	-0.55	rgb( 97,144,238)	1.9927	None
Foxf2	Nhs	0.98075	50.05	0.554	rgb(223,111,112)	1.9927	2,2
Foxf2	Tmem173	0.98075	50.05	0.552	rgb(223,112,113)	1.9927	2,2
Hes1	Fam43a	0.98075	50.05	0.547	rgb(223,113,114)	1.9927	2,2
Irf1	Gbp4	0.98075	50.05	0.553	rgb(223,111,113)	1.9927	None
Irf2	Gatsl2	0.98075	50.05	0.547	rgb(223,113,114)	1.9927	None
Irf4	Wls	-0.98075	50.05	-0.55	rgb( 98,145,238)	1.9927	None
Jdp2	Dusp14	0.98075	50.05	0.554	rgb(223,111,112)	1.9927	None
Jun	Serinc5	0.98075	50.05	0.554	rgb(223,111,112)	1.9927	None
Kdm2b	Snord89	-0.98075	50.05	-0.55	rgb( 97,144,238)	1.9927	2,2
Kdm5b	Ero1l	0.98075	50.05	0.552	rgb(223,111,113)	1.9927	2,2
Klf13	Fam189b	0.98075	50.05	0.547	rgb(223,113,114)	1.9927	2,2
Klf13	Ndrg1	0.98075	50.05	0.552	rgb(223,112,113)	1.9927	None
Lcorl	Cmtm4	0.98075	50.05	0.552	rgb(223,112,113)	1.9927	2,2
Lyl1	Ggn	0.98075	50.05	0.547	rgb(223,112,114)	1.9927	None
Maf	Ctla2a	0.98075	50.05	0.549	rgb(223,112,113)	1.9927	None
Mxd3	Fbxo44	0.98075	50.05	0.547	rgb(223,112,114)	1.9927	2,2
Myb	Adarb1	-0.98075	50.05	-0.55	rgb( 98,144,238)	1.9927	None
Myb	Ly6e	0.98075	50.05	0.547	rgb(223,113,114)	1.9927	2,2
Nfatc1	Gfod1	0.98075	50.05	0.554	rgb(223,111,112)	1.9927	None
Nfatc4	Cebpb	0.98075	50.05	0.547	rgb(223,113,114)	1.9927	2,2
Nfil3	Htr1b	0.98075	50.05	0.554	rgb(223,111,112)	1.9927	None
Nr4a2	Tapbpl	0.98075	50.05	0.546	rgb(223,113,114)	1.9927	2,2
Plagl1	Mex3a	0.98075	50.05	0.554	rgb(223,111,112)	1.9927	2,2
Pou6f1	Myo1h	0.98075	50.05	0.55	rgb(223,112,113)	1.9927	2,2
Rest	Uckl1os	0.98075	50.05	0.549	rgb(223,112,113)	1.9927	None
Rxra	Myo18a	0.98075	50.05	0.545	rgb(223,113,114)	1.9927	None
Smad3	Cyr61	-0.98075	50.05	-0.55	rgb( 98,144,238)	1.9927	None
Sp4	Ubtd1	0.98075	50.05	0.547	rgb(223,112,114)	1.9927	None
Sp4	Wwp1	0.98075	50.05	0.552	rgb(223,112,113)	1.9927	None
Sp4	Zc3h6	0.98075	50.05	0.555	rgb(223,111,112)	1.9927	None
Stat4	Icam1	-0.98075	50.05	-0.55	rgb( 98,145,238)	1.9927	None
Tcf12	Idh1	-0.98075	50.05	-0.55	rgb( 97,144,238)	1.9927	None
Tcf4	Fads2	0.98075	50.05	0.545	rgb(223,113,114)	1.9927	2,2
Tcf7l1	Pdcd1lg2	-0.98075	50.05	-0.55	rgb( 97,144,238)	1.9927	None
Tead1	Faim3	0.98075	50.05	0.552	rgb(223,111,113)	1.9927	2,2
Tead1	Socs2	0.98075	50.05	0.55	rgb(223,112,113)	1.9927	2,2
Tulp2	Tnnt3	0.98075	50.05	0.548	rgb(223,112,113)	1.9927	2,2
Vax2	Il17a	0.98075	50.05	0.549	rgb(223,112,113)	1.9927	2,2
Vax2	Il23r	0.98075	50.05	0.55	rgb(223,112,113)	1.9927	2,2
Yy2	Rabgap1l	-0.98075	50.05	-0.55	rgb( 98,145,238)	1.9927	None
Zbed3	Zadh2	0.98075	50.05	0.554	rgb(223,111,112)	1.9927	2,2
Zbtb32	P4ha2	0.98075	50.05	0.546	rgb(223,113,114)	1.9927	2,2
Zbtb7b	Atcay	0.98075	50.05	0.547	rgb(223,113,114)	1.9927	None
Zbtb7c	Scarf2	0.98075	50.05	0.548	rgb(223,112,113)	1.9927	2,2
Zeb2	Serpine1	0.98075	50.05	0.548	rgb(223,112,114)	1.9927	2,2
Zfp148	Adora2a	-0.98075	50.05	-0.55	rgb( 97,144,238)	1.9927	None
Zfp385a	Ccng1	0.98075	50.05	0.551	rgb(223,112,113)	1.9927	2,2
Zfp385a	Zfp750	0.98075	50.05	0.552	rgb(223,112,113)	1.9927	2,2
Zfp429	H60b	-0.98075	50.05	-0.55	rgb( 97,144,238)	1.9927	2,2
Zfp467	Wisp1	0.98075	50.05	0.55	rgb(223,112,113)	1.9927	2,2
Zfp608	Havcr1	-0.98075	50.05	-0.55	rgb( 97,144,238)	1.9927	2,2
Zfp750	Ckmt1	0.98075	50.05	0.55	rgb(223,112,113)	1.9927	2,2
Zfp768	Angptl4	0.98075	50.05	0.552	rgb(223,112,113)	1.9927	2,2
Zfp869	Ets2	0.98075	50.05	0.552	rgb(223,112,113)	1.9927	2,2
Atf3	Plcd4	0.97939	50.02	0.516	rgb(223,118,120)	1.9921	None
Bcl6	Tmem125	0.97939	50.02	0.516	rgb(223,118,119)	1.9921	2,2
Bhlhe41	Eif4ebp1	0.97939	50.02	0.52	rgb(223,118,119)	1.9921	2,2
Bhlhe41	Gpt2	0.97939	50.02	0.524	rgb(223,117,118)	1.9921	2,2
Cebpb	Mpdu1	0.97939	50.02	0.521	rgb(223,117,119)	1.9921	None
Cebpg	Mmp10	0.97939	50.02	0.519	rgb(223,118,119)	1.9921	None
Creb3l1	Mdn1	-0.97939	50.02	-0.52	rgb(105,149,237)	1.9921	2,2
Csrnp1	1110057K04Rik	-0.97939	50.02	-0.52	rgb(105,149,237)	1.9921	2,2
E2f4	Zranb3	0.97939	50.02	0.516	rgb(223,118,119)	1.9921	2,2
Elk3	Ddit3	-0.97939	50.02	-0.52	rgb(104,148,237)	1.9921	None
Erg	Lime1	0.97939	50.02	0.521	rgb(223,117,119)	1.9921	None
Fbxl19	Samd1	0.97939	50.02	0.523	rgb(223,117,118)	1.9921	2,2
Fos	Tlcd2	0.97939	50.02	0.516	rgb(223,119,120)	1.9921	None
Foxb1	Emilin1	-0.97939	50.02	-0.52	rgb(103,148,237)	1.9921	2,2
Foxs1	Tbc1d4	0.97939	50.02	0.518	rgb(223,118,119)	1.9921	None
Gfi1	Cyp1b1	0.97939	50.02	0.516	rgb(223,118,119)	1.9921	None
Hbp1	Lgals7	0.97939	50.02	0.518	rgb(223,118,119)	1.9921	2,2
Hif1a	Itga7	0.97939	50.02	0.516	rgb(223,118,120)	1.9921	2,2
Hif1a	Nfyb	0.97939	50.02	0.52	rgb(223,118,119)	1.9921	2,2
Irf1	Dzip1	0.97939	50.02	0.517	rgb(223,118,119)	1.9921	None
Jazf1	9430020K01Rik	0.97939	50.02	0.516	rgb(223,118,119)	1.9921	2,2
Jdp2	Mxi1	-0.97939	50.02	-0.52	rgb(104,148,237)	1.9921	None
Klf4	Trim24	-0.97939	50.02	-0.52	rgb(104,149,237)	1.9921	None
Maff	Eif4ebp1	0.97939	50.02	0.521	rgb(223,117,119)	1.9921	None
Meis2	Celf2	0.97939	50.02	0.522	rgb(223,117,118)	1.9921	None
Myb	Lingo4	0.97939	50.02	0.523	rgb(223,117,118)	1.9921	None
Nfat5	Slco4a1	0.97939	50.02	0.517	rgb(223,118,119)	1.9921	None
Nfatc1	Gtf2i	-0.97939	50.02	-0.52	rgb(104,148,237)	1.9921	None
Nfia	Jag2	0.97939	50.02	0.523	rgb(223,117,118)	1.9921	2,2
Nfil3	Sh2d3c	-0.97939	50.02	-0.52	rgb(104,148,237)	1.9921	None
Nkx1-2	Sav1	0.97939	50.02	0.525	rgb(223,117,118)	1.9921	2,2
Nr1d1	Abhd16b	0.97939	50.02	0.522	rgb(223,117,118)	1.9921	None
Nr4a1	Lrba	-0.97939	50.02	-0.52	rgb(105,149,237)	1.9921	2,2
Nr4a2	Sytl2	0.97939	50.02	0.521	rgb(223,118,119)	1.9921	None
Nr4a3	Syn1	0.97939	50.02	0.515	rgb(223,119,120)	1.9921	2,2
Pou6f1	Dcp2	-0.97939	50.02	-0.52	rgb(103,148,237)	1.9921	None
Pou6f1	Gpr15	0.97939	50.02	0.522	rgb(223,117,118)	1.9921	None
Prdm1	Anapc1	-0.97939	50.02	-0.52	rgb(105,149,237)	1.9921	None
Rbck1	Txndc17	-0.97939	50.02	-0.52	rgb(104,148,237)	1.9921	2,2
Rxrb	Sema6d	-0.97939	50.02	-0.52	rgb(104,148,237)	1.9921	2,2
Sall4	Sema4d	0.97939	50.02	0.525	rgb(223,117,118)	1.9921	2,2
Satb1	Slc9a2	-0.97939	50.02	-0.52	rgb(105,149,237)	1.9921	2,2
Smad3	Ptgfrn	0.97939	50.02	0.516	rgb(223,118,119)	1.9921	None
Sox5	Mapk7	-0.97939	50.02	-0.52	rgb(105,149,237)	1.9921	2,2
Sp3	Adam15	0.97939	50.02	0.517	rgb(223,118,119)	1.9921	None
Srf	Rgs16	0.97939	50.02	0.519	rgb(223,118,119)	1.9921	None
Stat1	Il10	0.97939	50.02	0.516	rgb(223,118,119)	1.9921	None
Stat2	Wls	0.97939	50.02	0.522	rgb(223,117,118)	1.9921	None
Stat3	Itgb3	-0.97939	50.02	-0.52	rgb(105,149,237)	1.9921	2,2
Stat3	Lif	0.97939	50.02	0.518	rgb(223,118,119)	1.9921	None
Stat3	Timp1	0.97939	50.02	0.525	rgb(223,117,118)	1.9921	2,2
Tbx6	Sqle	-0.97939	50.02	-0.52	rgb(104,148,237)	1.9921	2,2
Tcf7l2	Heg1	0.97939	50.02	0.524	rgb(223,117,118)	1.9921	None
Tef	Galnt3	0.97939	50.02	0.518	rgb(223,118,119)	1.9921	None
Trp53	Lrrc28	0.97939	50.02	0.523	rgb(223,117,118)	1.9921	2,2
Twist1	Exoc6	0.97939	50.02	0.516	rgb(223,118,119)	1.9921	2,2
Usf2	Otud1	0.97939	50.02	0.524	rgb(223,117,118)	1.9921	None
Vax2	Emilin1	-0.97939	50.02	-0.52	rgb(105,149,237)	1.9921	2,2
Zbtb33	Arf1	0.97939	50.02	0.517	rgb(223,118,119)	1.9921	None
Zbtb33	Xpnpep1	0.97939	50.02	0.517	rgb(223,118,119)	1.9921	None
Zbtb46	Nfkb2	0.97939	50.02	0.519	rgb(223,118,119)	1.9921	2,2
Zfp148	Ssh2	0.97939	50.02	0.525	rgb(223,117,118)	1.9921	None
Zfp280b	Zfp467	0.97939	50.02	0.518	rgb(223,118,119)	1.9921	2,2
Zfp385a	Gria3	0.97939	50.02	0.519	rgb(223,118,119)	1.9921	2,2
Zfp385a	Rap2b	0.97939	50.02	0.516	rgb(223,118,119)	1.9921	2,2
Zfp395	Stc2	0.97939	50.02	0.521	rgb(223,117,118)	1.9921	2,2
Zfp429	Ankrd33b	0.97939	50.02	0.52	rgb(223,118,119)	1.9921	2,2
Zfp429	Fbxo44	0.97939	50.02	0.521	rgb(223,118,119)	1.9921	2,2
Zfp629	Hemgn	0.97939	50.02	0.516	rgb(223,118,119)	1.9921	2,2
Zfp750	Ccdc159	0.97939	50.02	0.517	rgb(223,118,119)	1.9921	2,2
Zfp777	Rab27a	-0.97939	50.02	-0.52	rgb(104,148,237)	1.9921	2,2
Zhx2	Plekha1	0.97939	50.02	0.518	rgb(223,118,119)	1.9921	2,2
Zscan22	A730017L22Rik	0.97939	50.02	0.517	rgb(223,118,119)	1.9921	2,2
Atf3	Ankrd13c	0.97796	50.04	0.545	rgb(223,113,114)	1.9925	None
Batf	Asap1	0.97796	50.04	0.542	rgb(223,114,115)	1.9925	None
C030039L03Rik	3110057O12Rik	0.97796	50.04	0.543	rgb(223,113,114)	1.9925	2,2
Cebpb	Aqp9	0.97796	50.04	0.537	rgb(223,114,115)	1.9925	2,2
Cebpg	Ddit3	0.97796	50.04	0.544	rgb(223,113,114)	1.9925	None
Ddit3	Cox6a2	0.97796	50.04	0.542	rgb(223,113,115)	1.9925	2,2
Ddit3	Sars	0.97796	50.04	0.543	rgb(223,113,114)	1.9925	2,2
E2f1	Gen1	0.97796	50.04	0.538	rgb(223,114,115)	1.9925	None
Egr2	Pten	-0.97796	50.04	-0.54	rgb( 99,145,238)	1.9925	None
Elf1	Mafg	-0.97796	50.04	-0.54	rgb( 99,145,238)	1.9925	None
Elf1	Syne1	0.97796	50.04	0.543	rgb(223,113,114)	1.9925	2,2
Epas1	Spire1	-0.97796	50.04	-0.54	rgb(100,146,237)	1.9925	2,2
Etv4	Aldh1l2	0.97796	50.04	0.541	rgb(223,114,115)	1.9925	None
Fos	Ifi27l2a	0.97796	50.04	0.544	rgb(223,113,114)	1.9925	None
Fosl2	Ctla2b	0.97796	50.04	0.544	rgb(223,113,114)	1.9925	None
Foxo3	Ptp4a3	0.97796	50.04	0.542	rgb(223,113,114)	1.9925	None
Gabpa	Ccdc50	0.97796	50.04	0.543	rgb(223,113,114)	1.9925	None
Gm13157	Bok	-0.97796	50.04	-0.54	rgb(101,146,237)	1.9925	2,2
Gm13212	Pgap1	0.97796	50.04	0.541	rgb(223,114,115)	1.9925	2,2
Hic1	Cttn	0.97796	50.04	0.536	rgb(223,115,116)	1.9925	None
Hsf1	Rabgap1l	-0.97796	50.04	-0.54	rgb(101,146,237)	1.9925	None
Irf1	Insrr	0.97796	50.04	0.536	rgb(223,115,116)	1.9925	2,2
Irf2	Znhit6	0.97796	50.04	0.538	rgb(223,114,115)	1.9925	None
Irf4	Kdelc2	-0.97796	50.04	-0.54	rgb( 99,145,238)	1.9925	None
Irf4	Ptk2	-0.97796	50.04	-0.54	rgb(101,146,237)	1.9925	None
Irf4	Skil	0.97796	50.04	0.542	rgb(223,113,115)	1.9925	None
Irf5	Trim14	0.97796	50.04	0.536	rgb(223,115,116)	1.9925	None
Irf7	Ifi27l2a	0.97796	50.04	0.536	rgb(223,115,116)	1.9925	None
Jund	Cebpb	0.97796	50.04	0.536	rgb(223,115,116)	1.9925	2,2
Klf13	Aen	-0.97796	50.04	-0.54	rgb(100,146,238)	1.9925	None
Klf2	Ttyh3	0.97796	50.04	0.538	rgb(223,114,115)	1.9925	2,2
Klf6	Cd5l	0.97796	50.04	0.539	rgb(223,114,115)	1.9925	2,2
Klf7	Insm1	-0.97796	50.04	-0.54	rgb( 99,145,238)	1.9925	2,2
Lin54	Gpsm2	0.97796	50.04	0.542	rgb(223,114,115)	1.9925	None
Maf	Aqp3	0.97796	50.04	0.54	rgb(223,114,115)	1.9925	2,2
Mxi1	Dpf1	0.97796	50.04	0.54	rgb(223,114,115)	1.9925	None
Nr4a3	B4galnt4	-0.97796	50.04	-0.54	rgb( 99,145,238)	1.9925	2,2
Plagl1	Bid	0.97796	50.04	0.541	rgb(223,114,115)	1.9925	2,2
Rara	Gfod1	-0.97796	50.04	-0.54	rgb(100,146,237)	1.9925	None
Rorc	C2cd4d	0.97796	50.04	0.537	rgb(223,115,116)	1.9925	2,2
Rxra	Gata3	0.97796	50.04	0.54	rgb(223,114,115)	1.9925	None
Rxra	Itpr1	0.97796	50.04	0.535	rgb(223,115,116)	1.9925	None
Scml4	Atp8b4	0.97796	50.04	0.535	rgb(223,115,116)	1.9925	2,2
Scml4	Gimap4	0.97796	50.04	0.543	rgb(223,113,114)	1.9925	2,2
Scrt1	Stat2	0.97796	50.04	0.54	rgb(223,114,115)	1.9925	2,2
Sp4	Dgat1	0.97796	50.04	0.539	rgb(223,114,115)	1.9925	None
Sp4	Stx1a	-0.97796	50.04	-0.54	rgb(100,146,237)	1.9925	None
Sp4	Stx7	0.97796	50.04	0.542	rgb(223,113,114)	1.9925	None
Sp6	Lrrc66	-0.97796	50.04	-0.54	rgb(101,146,237)	1.9925	2,2
Srf	Rps14	-0.97796	50.04	-0.54	rgb(100,146,238)	1.9925	None
Stat2	Igtp	0.97796	50.04	0.536	rgb(223,115,116)	1.9925	2,2
Stat4	Lrp8	-0.97796	50.04	-0.54	rgb(100,146,237)	1.9925	None
Stat4	Nudt6	-0.97796	50.04	-0.54	rgb( 99,145,238)	1.9925	None
Stat4	Polr3gl	0.97796	50.04	0.538	rgb(223,114,115)	1.9925	None
Stat5b	Usp22	0.97796	50.04	0.538	rgb(223,114,115)	1.9925	2,2
Tbx21	Etv6	0.97796	50.04	0.537	rgb(223,114,115)	1.9925	None
Tead1	Kcna3	-0.97796	50.04	-0.54	rgb( 99,145,238)	1.9925	None
Trps1	Slc14a1	-0.97796	50.04	-0.54	rgb( 99,145,238)	1.9925	2,2
Twist1	Glt28d2	0.97796	50.04	0.538	rgb(223,114,115)	1.9925	2,2
Yy2	Slc25a30	-0.97796	50.04	-0.54	rgb(101,146,237)	1.9925	None
Zbed6	Nfat5	0.97796	50.04	0.536	rgb(223,115,116)	1.9925	2,2
Zbtb32	Adamts17	-0.97796	50.04	-0.54	rgb(101,146,237)	1.9925	2,2
Zbtb7b	Arid3a	0.97796	50.04	0.541	rgb(223,114,115)	1.9925	None
Zbtb7b	Cd4	0.97796	50.04	0.538	rgb(223,114,115)	1.9925	2,2
Zeb2	Ly6e	0.97796	50.04	0.544	rgb(223,113,114)	1.9925	2,2
Zfp112	Ccng2	-0.97796	50.04	-0.54	rgb( 99,145,238)	1.9925	2,2
Zfp148	Pmm1	-0.97796	50.04	-0.54	rgb(100,146,238)	1.9925	None
Zfp263	Dlg3	-0.97796	50.04	-0.54	rgb( 99,145,238)	1.9925	None
Zfp263	Gpsm2	-0.97796	50.04	-0.54	rgb( 99,145,238)	1.9925	None
Zfp263	Ikbke	0.97796	50.04	0.541	rgb(223,114,115)	1.9925	None
Zfp281	0610007P14Rik	-0.97796	50.04	-0.54	rgb(100,146,238)	1.9925	None
Zfp365	Ccng1	0.97796	50.04	0.539	rgb(223,114,115)	1.9925	2,2
Zfp367	Tyms	0.97796	50.04	0.535	rgb(223,115,116)	1.9925	2,2
Zfp367	Wdr76	0.97796	50.04	0.541	rgb(223,114,115)	1.9925	2,2
Zfp467	Armcx6	0.97796	50.04	0.536	rgb(223,115,116)	1.9925	2,2
Zfp524	Rpl14	0.97796	50.04	0.535	rgb(223,115,116)	1.9925	2,2
Zfp777	Ctss	-0.97796	50.04	-0.54	rgb(100,146,237)	1.9925	2,2
Aebp2	Atp8b4	-0.97621	50.01	-0.51	rgb(105,149,237)	1.9919	2,2
Aebp2	Rassf1	0.97621	50.01	0.511	rgb(223,119,120)	1.9919	2,2
Ahrr	Osm	-0.97621	50.01	-0.51	rgb(105,149,237)	1.9919	2,2
Akna	Homez	0.97621	50.01	0.506	rgb(223,120,121)	1.9919	2,2
Ankzf1	Arrb1	0.97621	50.01	0.511	rgb(223,119,120)	1.9919	2,2
Ascl2	Dip2b	0.97621	50.01	0.51	rgb(223,120,121)	1.9919	None
Batf	Flna	0.97621	50.01	0.511	rgb(223,119,120)	1.9919	2,2
Batf	Stat3	0.97621	50.01	0.514	rgb(223,119,120)	1.9919	None
Bcl6	Hist2h2bb	0.97621	50.01	0.51	rgb(223,120,121)	1.9919	None
Bhlha15	Sik1	0.97621	50.01	0.513	rgb(223,119,120)	1.9919	2,2
C030039L03Rik	Atp7b	0.97621	50.01	0.508	rgb(223,120,121)	1.9919	2,2
Dach2	Gpr141	0.97621	50.01	0.508	rgb(223,120,121)	1.9919	2,2
Dmrt1	Inpp4a	0.97621	50.01	0.512	rgb(223,119,120)	1.9919	2,2
E2f1	Ypel5	-0.97621	50.01	-0.51	rgb(106,149,236)	1.9919	None
E2f4	E2f7	0.97621	50.01	0.514	rgb(223,119,120)	1.9919	2,2
Egr2	Bcl2a1d	0.97621	50.01	0.513	rgb(223,119,120)	1.9919	None
Egr2	Dach2	-0.97621	50.01	-0.51	rgb(107,150,236)	1.9919	None
Fbxl19	Fth1	-0.97621	50.01	-0.51	rgb(106,149,237)	1.9919	2,2
Foxc1	Tle4	0.97621	50.01	0.513	rgb(223,119,120)	1.9919	None
Foxf2	Cd101	-0.97621	50.01	-0.51	rgb(106,149,236)	1.9919	2,2
Foxf2	Lpxn	-0.97621	50.01	-0.51	rgb(106,150,236)	1.9919	2,2
Foxh1	Slc39a14	-0.97621	50.01	-0.51	rgb(106,150,236)	1.9919	2,2
Glis1	Trpm1	0.97621	50.01	0.506	rgb(223,120,121)	1.9919	2,2
Hif1a	Hs3st6	0.97621	50.01	0.506	rgb(223,120,121)	1.9919	2,2
Hmx2	1110032F04Rik	-0.97621	50.01	-0.51	rgb(107,150,236)	1.9919	2,2
Irf8	Serpinb9	0.97621	50.01	0.506	rgb(223,120,121)	1.9919	None
Jdp2	Traf3	0.97621	50.01	0.512	rgb(223,119,120)	1.9919	None
Junb	Olfm2	0.97621	50.01	0.51	rgb(223,120,121)	1.9919	None
Klf4	Pafah1b3	0.97621	50.01	0.515	rgb(223,119,120)	1.9919	2,2
Klf8	Sco1	0.97621	50.01	0.513	rgb(223,119,120)	1.9919	None
Lhx6	Adora2b	0.97621	50.01	0.506	rgb(223,120,121)	1.9919	2,2
Litaf	Cmya5	0.97621	50.01	0.508	rgb(223,120,121)	1.9919	2,2
Lyl1	Tst	0.97621	50.01	0.514	rgb(223,119,120)	1.9919	2,2
Mbnl2	Pak1	0.97621	50.01	0.513	rgb(223,119,120)	1.9919	2,2
Msc	Tigit	0.97621	50.01	0.508	rgb(223,120,121)	1.9919	None
Myt1l	Zdbf2	0.97621	50.01	0.507	rgb(223,120,121)	1.9919	2,2
Ncoa1	Aff3	0.97621	50.01	0.511	rgb(223,119,120)	1.9919	2,2
Nfic	Tmem176a	0.97621	50.01	0.512	rgb(223,119,120)	1.9919	None
Nkx3-1	Rftn1	-0.97621	50.01	-0.51	rgb(107,150,236)	1.9919	None
Nr2f1	4932438H23Rik	0.97621	50.01	0.509	rgb(223,120,121)	1.9919	None
Nr2f1	Icam1	-0.97621	50.01	-0.51	rgb(107,150,236)	1.9919	None
Ovol1	H1f0	-0.97621	50.01	-0.51	rgb(106,149,237)	1.9919	2,2
Plscr1	Dhrs9	0.97621	50.01	0.511	rgb(223,119,120)	1.9919	2,2
Rela	Mllt6	-0.97621	50.01	-0.51	rgb(107,150,236)	1.9919	None
Rora	Ppp1r14c	0.97621	50.01	0.505	rgb(223,120,122)	1.9919	2,2
Rreb1	BC065397	0.97621	50.01	0.512	rgb(223,119,120)	1.9919	None
Rxra	Rims2	0.97621	50.01	0.506	rgb(223,120,121)	1.9919	None
Rxrb	Cpa2	0.97621	50.01	0.512	rgb(223,119,120)	1.9919	None
Sall3	Dgat1	-0.97621	50.01	-0.51	rgb(107,150,236)	1.9919	2,2
Sall4	Tbc1d16	0.97621	50.01	0.509	rgb(223,120,121)	1.9919	2,2
Satb1	Foxp3	-0.97621	50.01	-0.51	rgb(105,149,237)	1.9919	2,2
Six5	Id2	-0.97621	50.01	-0.51	rgb(107,150,236)	1.9919	2,2
Skil	Pmepa1	0.97621	50.01	0.513	rgb(223,119,120)	1.9919	2,2
Smad3	Aqp3	0.97621	50.01	0.513	rgb(223,119,120)	1.9919	2,2
Smad3	Ss18	0.97621	50.01	0.514	rgb(223,119,120)	1.9919	None
Sox13	Tnfrsf8	0.97621	50.01	0.51	rgb(223,120,121)	1.9919	None
Sp3	Plekho2	0.97621	50.01	0.511	rgb(223,119,120)	1.9919	None
Sp4	Socs5	0.97621	50.01	0.511	rgb(223,119,120)	1.9919	None
Srebf1	Kif3a	0.97621	50.01	0.506	rgb(223,120,121)	1.9919	None
Stat3	Ripk2	-0.97621	50.01	-0.51	rgb(107,150,236)	1.9919	None
Stat3	Rnf149	0.97621	50.01	0.509	rgb(223,120,121)	1.9919	None
Stat5b	Pgs1	0.97621	50.01	0.509	rgb(223,120,121)	1.9919	2,2
Tcf12	Mrgpre	0.97621	50.01	0.512	rgb(223,119,120)	1.9919	None
Terf1	Cdc25b	0.97621	50.01	0.51	rgb(223,120,121)	1.9919	2,2
Trp53	Bcl2l1	0.97621	50.01	0.515	rgb(223,119,120)	1.9919	None
Trp53	Cd81	0.97621	50.01	0.505	rgb(223,121,122)	1.9919	None
Trp53	Tsc22d3	-0.97621	50.01	-0.51	rgb(107,150,236)	1.9919	None
Trp73	Gtse1	0.97621	50.01	0.507	rgb(223,120,121)	1.9919	2,2
Twist1	Acss1	0.97621	50.01	0.514	rgb(223,119,120)	1.9919	None
Zbtb17	Cisd3	-0.97621	50.01	-0.51	rgb(107,150,236)	1.9919	2,2
Zbtb32	Fam129a	0.97621	50.01	0.508	rgb(223,120,121)	1.9919	2,2
Zbtb33	Parp8	-0.97621	50.01	-0.51	rgb(107,150,236)	1.9919	None
Zbtb46	Cd83	0.97621	50.01	0.509	rgb(223,120,121)	1.9919	2,2
Zeb2	Akr1b8	0.97621	50.01	0.511	rgb(223,119,120)	1.9919	2,2
Zeb2	Sytl3	0.97621	50.01	0.507	rgb(223,120,121)	1.9919	2,2
Zfp146	Fbxw2	-0.97621	50.01	-0.51	rgb(106,150,236)	1.9919	2,2
Zfp148	Epas1	0.97621	50.01	0.505	rgb(223,120,121)	1.9919	None
Zfp219	Gapdhs	0.97621	50.01	0.509	rgb(223,120,121)	1.9919	None
Zfp276	Amigo3	0.97621	50.01	0.509	rgb(223,120,121)	1.9919	2,2
Zfp277	Tfpi	0.97621	50.01	0.511	rgb(223,119,120)	1.9919	2,2
Zfp280b	Itgb1	0.97621	50.01	0.514	rgb(223,119,120)	1.9919	2,2
Zfp280b	Smpdl3b	0.97621	50.01	0.514	rgb(223,119,120)	1.9919	2,2
Zfp280c	Pigb	0.97621	50.01	0.509	rgb(223,120,121)	1.9919	2,2
Zfp300	Eef1a1	0.97621	50.01	0.509	rgb(223,120,121)	1.9919	2,2
Zfp358	Amdhd2	0.97621	50.01	0.514	rgb(223,119,120)	1.9919	2,2
Zfp365	Psrc1	0.97621	50.01	0.513	rgb(223,119,120)	1.9919	2,2
Zfp367	Fam111a	0.97621	50.01	0.511	rgb(223,119,120)	1.9919	2,2
Zfp398	Cnot1	0.97621	50.01	0.511	rgb(223,119,120)	1.9919	2,2
Zfp608	Itih5	0.97621	50.01	0.512	rgb(223,119,120)	1.9919	2,2
Zfp664	Actbl2	0.97621	50.01	0.512	rgb(223,119,120)	1.9919	None
Zfp808	Rfwd3	0.97621	50.01	0.508	rgb(223,120,121)	1.9919	2,2
Zfp827	Rreb1	0.97621	50.01	0.509	rgb(223,120,121)	1.9919	2,2
Zfp868	Pgm2	-0.97621	50.01	-0.51	rgb(106,150,236)	1.9919	2,2
Zhx2	Trove2	-0.97621	50.01	-0.51	rgb(106,150,236)	1.9919	2,2
Bach1	Rasgrp2	0.97472	50.03	0.534	rgb(223,115,116)	1.9923	2,2
Bhlhe40	Capn2	0.97472	50.03	0.531	rgb(223,116,117)	1.9923	None
Bhlhe40	Runx2	0.97472	50.03	0.533	rgb(223,115,116)	1.9923	None
Cdc5l	S1pr2	-0.97472	50.03	-0.53	rgb(102,147,237)	1.9923	2,2
Cebpg	Ipmk	0.97472	50.03	0.529	rgb(223,116,117)	1.9923	2,2
Cebpg	Tsc22d3	0.97472	50.03	0.53	rgb(223,116,117)	1.9923	2,2
Cux1	Fam20a	0.97472	50.03	0.534	rgb(223,115,116)	1.9923	2,2
Cxxc5	Tspan3	0.97472	50.03	0.531	rgb(223,116,117)	1.9923	2,2
Egr1	Arfgap3	-0.97472	50.03	-0.53	rgb(101,147,237)	1.9923	None
Egr1	Nr4a1	0.97472	50.03	0.526	rgb(223,117,118)	1.9923	None
Egr1	Trib1	0.97472	50.03	0.533	rgb(223,115,116)	1.9923	None
Egr3	Cwh43	-0.97472	50.03	-0.53	rgb(103,147,237)	1.9923	2,2
Elf1	Commd9	-0.97472	50.03	-0.53	rgb(102,147,237)	1.9923	None
Elf1	Stat4	0.97472	50.03	0.53	rgb(223,116,117)	1.9923	None
Ets1	Ikzf4	0.97472	50.03	0.531	rgb(223,116,117)	1.9923	None
Ets1	Klhl6	0.97472	50.03	0.526	rgb(223,117,118)	1.9923	None
Ets1	Matk	0.97472	50.03	0.532	rgb(223,115,116)	1.9923	None
Ets1	Ppp1r10	-0.97472	50.03	-0.53	rgb(102,147,237)	1.9923	None
Ets1	Scrt1	0.97472	50.03	0.533	rgb(223,115,116)	1.9923	None
Etv4	Galm	0.97472	50.03	0.525	rgb(223,117,118)	1.9923	2,2
Fosl2	Il4ra	0.97472	50.03	0.528	rgb(223,116,117)	1.9923	None
Foxf2	Stxbp6	0.97472	50.03	0.534	rgb(223,115,116)	1.9923	2,2
Foxs1	Hvcn1	0.97472	50.03	0.526	rgb(223,116,118)	1.9923	2,2
Gata1	Itih5	0.97472	50.03	0.535	rgb(223,115,116)	1.9923	2,2
Gata3	4930506M07Rik	0.97472	50.03	0.526	rgb(223,117,118)	1.9923	2,2
Gli3	Nhs	0.97472	50.03	0.529	rgb(223,116,117)	1.9923	2,2
Hey1	Nfil3	0.97472	50.03	0.53	rgb(223,116,117)	1.9923	None
Hif1a	Malt1	0.97472	50.03	0.525	rgb(223,117,118)	1.9923	None
Hsf1	Elovl7	-0.97472	50.03	-0.53	rgb(102,147,237)	1.9923	None
Hsf1	Sbno2	0.97472	50.03	0.527	rgb(223,116,117)	1.9923	None
Irf1	Tapbpl	0.97472	50.03	0.532	rgb(223,115,116)	1.9923	2,2
Irf4	Ripk2	-0.97472	50.03	-0.53	rgb(102,147,237)	1.9923	None
Irf7	Ifit1	0.97472	50.03	0.535	rgb(223,115,116)	1.9923	None
Irf7	Mx2	0.97472	50.03	0.53	rgb(223,116,117)	1.9923	None
Irf8	Auh	-0.97472	50.03	-0.53	rgb(103,148,237)	1.9923	None
Jazf1	Tnfsf9	0.97472	50.03	0.531	rgb(223,116,117)	1.9923	2,2
Klf13	Rps6ka2	0.97472	50.03	0.526	rgb(223,117,118)	1.9923	None
Maf	Il21	0.97472	50.03	0.527	rgb(223,116,117)	1.9923	2,2
Maf	Stab1	0.97472	50.03	0.532	rgb(223,115,116)	1.9923	None
Mafg	N4bp2l1	-0.97472	50.03	-0.53	rgb(103,147,237)	1.9923	None
Mbnl2	Inpp1	0.97472	50.03	0.534	rgb(223,115,116)	1.9923	2,2
Mxi1	Kcnj14	-0.97472	50.03	-0.53	rgb(101,147,237)	1.9923	None
Nfat5	Abcg1	-0.97472	50.03	-0.53	rgb(101,147,237)	1.9923	None
Nfe2l2	Dab2	0.97472	50.03	0.533	rgb(223,115,116)	1.9923	None
Nr1d1	Galnt12	0.97472	50.03	0.526	rgb(223,116,118)	1.9923	None
Nr3c1	Ctla4	-0.97472	50.03	-0.53	rgb(103,147,237)	1.9923	None
Nr4a3	Nr4a1	0.97472	50.03	0.53	rgb(223,116,117)	1.9923	2,2
Plagl1	Ikzf2	0.97472	50.03	0.529	rgb(223,116,117)	1.9923	2,2
Plagl1	Tmc6	-0.97472	50.03	-0.53	rgb(102,147,237)	1.9923	2,2
Plscr1	Glrp1	0.97472	50.03	0.533	rgb(223,115,116)	1.9923	2,2
Pou2af1	Cbx4	-0.97472	50.03	-0.53	rgb(101,147,237)	1.9923	None
Rbck1	Slc9a8	0.97472	50.03	0.533	rgb(223,115,116)	1.9923	2,2
Rest	Kdelc1	-0.97472	50.03	-0.53	rgb(103,148,237)	1.9923	None
Rfx3	Rcl1	-0.97472	50.03	-0.53	rgb(102,147,237)	1.9923	None
Rreb1	Tet3	0.97472	50.03	0.527	rgb(223,116,117)	1.9923	None
Scrt1	Ctla4	0.97472	50.03	0.532	rgb(223,115,116)	1.9923	None
Sgsm2	Ccrn4l	-0.97472	50.03	-0.53	rgb(103,148,237)	1.9923	2,2
Sgsm2	Kiss1r	0.97472	50.03	0.531	rgb(223,116,117)	1.9923	2,2
Sp2	2310022B05Rik	0.97472	50.03	0.527	rgb(223,116,117)	1.9923	None
Sp2	Psmd8	-0.97472	50.03	-0.53	rgb(103,147,237)	1.9923	None
Sp3	Dcakd	-0.97472	50.03	-0.53	rgb(101,147,237)	1.9923	None
Sp3	Lin54	0.97472	50.03	0.528	rgb(223,116,117)	1.9923	None
Spib	Pik3r3	0.97472	50.03	0.535	rgb(223,115,116)	1.9923	None
Srebf1	Tnk2	0.97472	50.03	0.534	rgb(223,115,116)	1.9923	None
Stat1	Dtx3l	0.97472	50.03	0.526	rgb(223,117,118)	1.9923	None
Stat3	Cdkn2d	0.97472	50.03	0.526	rgb(223,117,118)	1.9923	None
Tcf12	Cdkn1b	-0.97472	50.03	-0.53	rgb(102,147,237)	1.9923	None
Thra	Tjp3	0.97472	50.03	0.528	rgb(223,116,117)	1.9923	None
Vax2	2310007L24Rik	0.97472	50.03	0.529	rgb(223,116,117)	1.9923	2,2
Vax2	Inpp4a	0.97472	50.03	0.527	rgb(223,116,117)	1.9923	2,2
Yy2	Naca	-0.97472	50.03	-0.53	rgb(101,147,237)	1.9923	None
Yy2	Slfn3	0.97472	50.03	0.526	rgb(223,117,118)	1.9923	None
Zbed3	Cox6a2	0.97472	50.03	0.525	rgb(223,117,118)	1.9923	2,2
Zbtb7c	Mylk	0.97472	50.03	0.528	rgb(223,116,117)	1.9923	2,2
Zfp263	Rtn4	-0.97472	50.03	-0.53	rgb(103,147,237)	1.9923	None
Zfp385a	Robo3	0.97472	50.03	0.534	rgb(223,115,116)	1.9923	2,2
Zfp524	Notch1	-0.97472	50.03	-0.53	rgb(102,147,237)	1.9923	None
Zfp536	Zfhx3	0.97472	50.03	0.53	rgb(223,116,117)	1.9923	2,2
Zfp750	Exoc4	0.97472	50.03	0.527	rgb(223,116,117)	1.9923	2,2
Zfp771	Phlda3	0.97472	50.03	0.525	rgb(223,117,118)	1.9923	2,2
Arid3a	Lif	0.97334	50.02	0.518	rgb(223,118,119)	1.9921	2,2
Atf3	Srgn	0.97334	50.02	0.522	rgb(223,117,118)	1.9921	None
Batf	Ptger4	0.97334	50.02	0.521	rgb(223,118,119)	1.9921	None
Bhlhe40	Upb1	0.97334	50.02	0.517	rgb(223,118,119)	1.9921	None
Cebpg	B930041F14Rik	-0.97334	50.02	-0.52	rgb(105,149,237)	1.9921	None
Crem	Prkch	0.97334	50.02	0.524	rgb(223,117,118)	1.9921	None
Egr1	Dusp2	0.97334	50.02	0.52	rgb(223,118,119)	1.9921	None
Egr1	Zfp36	0.97334	50.02	0.521	rgb(223,118,119)	1.9921	None
Etv4	Gpt2	0.97334	50.02	0.521	rgb(223,118,119)	1.9921	2,2
Fosl2	Creb3l2	0.97334	50.02	0.519	rgb(223,118,119)	1.9921	None
Foxf2	Zhx2	-0.97334	50.02	-0.52	rgb(103,148,237)	1.9921	2,2
Foxn2	Rpusd2	0.97334	50.02	0.515	rgb(223,119,120)	1.9921	None
Foxo1	Endod1	0.97334	50.02	0.519	rgb(223,118,119)	1.9921	None
Hic1	Gfi1	0.97334	50.02	0.52	rgb(223,118,119)	1.9921	2,2
Hif3a	Stc1	0.97334	50.02	0.522	rgb(223,117,118)	1.9921	2,2
Ikzf2	Gm14446	0.97334	50.02	0.517	rgb(223,118,119)	1.9921	2,2
Irf4	Atxn1	0.97334	50.02	0.521	rgb(223,118,119)	1.9921	None
Irf4	B9d1	-0.97334	50.02	-0.52	rgb(104,148,237)	1.9921	2,2
Irf4	Ccr7	0.97334	50.02	0.519	rgb(223,118,119)	1.9921	None
Irf4	Hdac9	-0.97334	50.02	-0.52	rgb(105,149,237)	1.9921	None
Irf4	Lpcat1	-0.97334	50.02	-0.52	rgb(104,148,237)	1.9921	2,2
Jazf1	Enpp4	-0.97334	50.02	-0.52	rgb(104,148,237)	1.9921	2,2
Jun	Furin	0.97334	50.02	0.52	rgb(223,118,119)	1.9921	None
Jund	Rgs19	-0.97334	50.02	-0.52	rgb(104,148,237)	1.9921	None
Kdm2b	Gbp9	0.97334	50.02	0.519	rgb(223,118,119)	1.9921	2,2
Klf13	Helb	0.97334	50.02	0.524	rgb(223,117,118)	1.9921	None
Klf13	Zfp146	-0.97334	50.02	-0.52	rgb(104,148,237)	1.9921	None
Klf2	Sell	0.97334	50.02	0.517	rgb(223,118,119)	1.9921	2,2
Klf2	Tspan6	-0.97334	50.02	-0.52	rgb(104,148,237)	1.9921	2,2
Klf3	Sco1	-0.97334	50.02	-0.52	rgb(105,149,237)	1.9921	None
Lhx6	Sh2b1	0.97334	50.02	0.517	rgb(223,118,119)	1.9921	2,2
Lyl1	Itgb5	0.97334	50.02	0.519	rgb(223,118,119)	1.9921	2,2
Maf	Gpr15	0.97334	50.02	0.523	rgb(223,117,118)	1.9921	None
Mxd3	9530077C05Rik	0.97334	50.02	0.519	rgb(223,118,119)	1.9921	2,2
Myb	Stap1	0.97334	50.02	0.518	rgb(223,118,119)	1.9921	2,2
Nfatc2	Cpd	0.97334	50.02	0.518	rgb(223,118,119)	1.9921	None
Nfkb2	Csf2	0.97334	50.02	0.516	rgb(223,118,119)	1.9921	2,2
Nfkb2	Rel	0.97334	50.02	0.518	rgb(223,118,119)	1.9921	None
Plagl1	Cd84	-0.97334	50.02	-0.52	rgb(104,148,237)	1.9921	2,2
Rel	Heg1	0.97334	50.02	0.517	rgb(223,118,119)	1.9921	None
Rel	Vav1	-0.97334	50.02	-0.52	rgb(105,149,237)	1.9921	None
Rfx1	Psme2	-0.97334	50.02	-0.52	rgb(103,148,237)	1.9921	None
Rfx3	Slc4a8	0.97334	50.02	0.516	rgb(223,118,119)	1.9921	None
Six1	Six4	0.97334	50.02	0.521	rgb(223,118,119)	1.9921	2,2
Smad3	Alpk2	0.97334	50.02	0.518	rgb(223,118,119)	1.9921	None
Sp2	Rnf130	-0.97334	50.02	-0.52	rgb(105,149,237)	1.9921	None
Sp4	Bcor	-0.97334	50.02	-0.52	rgb(103,148,237)	1.9921	None
Sp4	Gmfg	0.97334	50.02	0.516	rgb(223,118,119)	1.9921	None
Sp4	Ppfibp1	-0.97334	50.02	-0.52	rgb(104,148,237)	1.9921	None
Srebf1	Itgb3bp	-0.97334	50.02	-0.52	rgb(104,148,237)	1.9921	None
Srebf1	Slc4a8	0.97334	50.02	0.523	rgb(223,117,118)	1.9921	None
Stat1	Lgals7	-0.97334	50.02	-0.52	rgb(104,148,237)	1.9921	2,2
Stat2	Dtx3l	0.97334	50.02	0.517	rgb(223,118,119)	1.9921	None
Tcf12	Tbc1d4	0.97334	50.02	0.522	rgb(223,117,118)	1.9921	None
Tead1	Pigr	0.97334	50.02	0.52	rgb(223,118,119)	1.9921	2,2
Tead1	Srgn	-0.97334	50.02	-0.52	rgb(105,149,237)	1.9921	None
Terf1	Dhx33	-0.97334	50.02	-0.52	rgb(104,148,237)	1.9921	2,2
Thra	Ndrg2	0.97334	50.02	0.523	rgb(223,117,118)	1.9921	2,2
Tulp3	Hist4h4	-0.97334	50.02	-0.52	rgb(105,149,237)	1.9921	2,2
Vax2	Cxcl3	0.97334	50.02	0.52	rgb(223,118,119)	1.9921	2,2
Vax2	Ppp1r14c	0.97334	50.02	0.524	rgb(223,117,118)	1.9921	2,2
Zbtb7a	Trp53i13	0.97334	50.02	0.515	rgb(223,119,120)	1.9921	None
Zeb1	Nfe2l2	0.97334	50.02	0.521	rgb(223,118,119)	1.9921	None
Zeb2	Aff3	-0.97334	50.02	-0.52	rgb(105,149,237)	1.9921	2,2
Zfp148	Synj1	0.97334	50.02	0.52	rgb(223,118,119)	1.9921	None
Zfp263	Vim	-0.97334	50.02	-0.52	rgb(105,149,237)	1.9921	None
Zfp280d	Acp5	-0.97334	50.02	-0.52	rgb(104,148,237)	1.9921	2,2
Zfp385a	Fam198b	0.97334	50.02	0.517	rgb(223,118,119)	1.9921	2,2
Zfp385a	Pmm1	0.97334	50.02	0.522	rgb(223,117,118)	1.9921	2,2
Zfp608	Prr7	-0.97334	50.02	-0.52	rgb(103,148,237)	1.9921	2,2
Zfp629	Zmat3	-0.97334	50.02	-0.52	rgb(104,148,237)	1.9921	2,2
Zfp750	Lrrc28	0.97334	50.02	0.518	rgb(223,118,119)	1.9921	2,2
Zfp750	Psrc1	0.97334	50.02	0.518	rgb(223,118,119)	1.9921	2,2
Zhx1	Dusp22	-0.97334	50.02	-0.52	rgb(104,149,237)	1.9921	2,2
Atmin	Ick	0.97168	50	0.501	rgb(223,121,122)	1.9917	2,2
Batf	Ahnak	0.97168	50	0.501	rgb(223,121,122)	1.9917	None
Bcl6	Nod2	0.97168	50	0.499	rgb(222,122,123)	1.9917	None
Bhlhe41	Aldh1l2	0.97168	50	0.504	rgb(223,121,122)	1.9917	None
Bhlhe41	Slc7a3	0.97168	50	0.503	rgb(223,121,122)	1.9917	2,2
Casz1	Myo10	0.97168	50	0.504	rgb(223,121,122)	1.9917	2,2
Cebpb	Cdyl2	-0.97168	50	-0.5	rgb(108,151,236)	1.9917	None
Cggbp1	Dclre1a	-0.97168	50	-0.5	rgb(108,151,236)	1.9917	2,2
Creb5	Hrh2	0.97168	50	0.498	rgb(222,122,123)	1.9917	2,2
Dlx3	Cacna2d1	0.97168	50	0.495	rgb(222,122,123)	1.9917	None
E2f1	Samd1	0.97168	50	0.497	rgb(222,122,123)	1.9917	None
E2f1	Smpd4	0.97168	50	0.5	rgb(222,122,123)	1.9917	None
E2f4	C2cd2l	0.97168	50	0.504	rgb(223,121,122)	1.9917	None
E2f4	Wdr76	0.97168	50	0.504	rgb(223,121,122)	1.9917	2,2
E4f1	4930417O13Rik	0.97168	50	0.496	rgb(222,122,123)	1.9917	2,2
Egr3	Ssbp4	0.97168	50	0.5	rgb(222,122,123)	1.9917	None
Erg	Dusp2	0.97168	50	0.504	rgb(223,121,122)	1.9917	None
Etv6	Fbxo18	-0.97168	50	-0.5	rgb(108,151,236)	1.9917	None
Fbxl19	Mex3d	0.97168	50	0.502	rgb(223,121,122)	1.9917	2,2
Fosl2	Tbc1d14	0.97168	50	0.502	rgb(223,121,122)	1.9917	None
Foxa1	Ppp3cc	0.97168	50	0.496	rgb(222,122,123)	1.9917	None
Foxn3	Spef2	0.97168	50	0.496	rgb(222,122,123)	1.9917	None
Foxo3	Lgals1	0.97168	50	0.5	rgb(222,122,123)	1.9917	None
Foxp1	Smox	-0.97168	50	-0.5	rgb(108,151,236)	1.9917	2,2
Gata3	Tnfrsf25	-0.97168	50	-0.5	rgb(109,151,236)	1.9917	2,2
Glis3	Fbxo44	0.97168	50	0.501	rgb(223,121,122)	1.9917	None
Hes5	Slc30a3	0.97168	50	0.502	rgb(223,121,122)	1.9917	None
Hic1	Lsp1	-0.97168	50	-0.5	rgb(109,151,236)	1.9917	None
Hif1a	Pdxp	0.97168	50	0.504	rgb(223,121,122)	1.9917	2,2
Hif1a	Plod2	0.97168	50	0.501	rgb(223,121,122)	1.9917	2,2
Hmx3	Antxr2	-0.97168	50	-0.5	rgb(108,150,236)	1.9917	None
Hoxd4	Il12rb2	0.97168	50	0.499	rgb(222,122,123)	1.9917	None
Hsf1	Ppm1j	-0.97168	50	-0.5	rgb(108,150,236)	1.9917	2,2
Hsf4	Jmjd6	0.97168	50	0.495	rgb(222,122,123)	1.9917	None
Irf8	Rims2	0.97168	50	0.502	rgb(223,121,122)	1.9917	None
Jazf1	Pim1	-0.97168	50	-0.5	rgb(109,152,236)	1.9917	2,2
Jund	Themis	0.97168	50	0.5	rgb(222,122,123)	1.9917	None
Klf12	Srpk1	-0.97168	50	-0.5	rgb(109,151,236)	1.9917	None
Klf4	Hspa4l	0.97168	50	0.496	rgb(222,122,123)	1.9917	None
Klf5	Trim3	0.97168	50	0.505	rgb(223,121,122)	1.9917	None
Myb	Cd80	0.97168	50	0.501	rgb(223,121,122)	1.9917	2,2
Nfatc2	Il3	0.97168	50	0.501	rgb(223,121,122)	1.9917	2,2
Nfe2	Prdm1	0.97168	50	0.496	rgb(222,122,123)	1.9917	None
Nfil3	Irf4	0.97168	50	0.504	rgb(223,121,122)	1.9917	2,2
Nfkb2	Rnf125	-0.97168	50	-0.5	rgb(110,152,236)	1.9917	None
Nhlh1	D830046C22Rik	0.97168	50	0.497	rgb(222,122,123)	1.9917	None
Npas4	Cisd3	0.97168	50	0.498	rgb(222,122,123)	1.9917	2,2
Nr1d1	Dab2	0.97168	50	0.5	rgb(223,121,122)	1.9917	None
Nr3c2	Zfp609	0.97168	50	0.5	rgb(222,122,123)	1.9917	2,2
Phf20	Tst	0.97168	50	0.5	rgb(222,122,123)	1.9917	2,2
Rbpj	4930426L09Rik	0.97168	50	0.497	rgb(222,122,123)	1.9917	2,2
Rest	Pycr1	0.97168	50	0.503	rgb(223,121,122)	1.9917	None
Rest	S100a3	0.97168	50	0.498	rgb(222,122,123)	1.9917	None
Rfx7	Susd1	0.97168	50	0.496	rgb(222,122,123)	1.9917	None
Rreb1	Epc1	0.97168	50	0.496	rgb(222,122,123)	1.9917	None
Rxra	Rgma	0.97168	50	0.505	rgb(223,121,122)	1.9917	None
Satb1	Eno3	-0.97168	50	-0.5	rgb(108,151,236)	1.9917	2,2
Satb1	Epn2	0.97168	50	0.497	rgb(222,122,123)	1.9917	2,2
Scml4	4632428N05Rik	0.97168	50	0.503	rgb(223,121,122)	1.9917	2,2
Six4	Tbx21	-0.97168	50	-0.5	rgb(109,151,236)	1.9917	2,2
Skil	Aim1	0.97168	50	0.5	rgb(222,122,123)	1.9917	2,2
Smad3	Ctsw	0.97168	50	0.497	rgb(222,122,123)	1.9917	2,2
Sp4	Kdm2b	-0.97168	50	-0.5	rgb(108,150,236)	1.9917	None
Sp6	Ell2	0.97168	50	0.504	rgb(223,121,122)	1.9917	None
Stat1	Tbc1d14	0.97168	50	0.499	rgb(222,122,123)	1.9917	None
Stat4	Bcl3	0.97168	50	0.504	rgb(223,121,122)	1.9917	None
Tbx21	Raph1	0.97168	50	0.499	rgb(222,122,123)	1.9917	2,2
Tbx21	Rassf1	0.97168	50	0.503	rgb(223,121,122)	1.9917	None
Tcf12	Adam15	0.97168	50	0.5	rgb(223,121,122)	1.9917	None
Tcf7l1	Ick	0.97168	50	0.5	rgb(222,122,123)	1.9917	None
Tead1	Glrp1	-0.97168	50	-0.5	rgb(108,151,236)	1.9917	2,2
Trp53	Aldh4a1	0.97168	50	0.501	rgb(223,121,122)	1.9917	None
Twist1	Csf2	-0.97168	50	-0.5	rgb(108,151,236)	1.9917	2,2
Zbtb17	Il10rb	-0.97168	50	-0.5	rgb(108,151,236)	1.9917	2,2
Zbtb32	Trpv2	0.97168	50	0.501	rgb(223,121,122)	1.9917	2,2
Zbtb38	Tpbg	0.97168	50	0.495	rgb(222,122,123)	1.9917	2,2
Zeb1	Ccr7	0.97168	50	0.503	rgb(223,121,122)	1.9917	None
Zfp263	Fam43a	0.97168	50	0.496	rgb(222,122,123)	1.9917	None
Zfp277	Flna	-0.97168	50	-0.5	rgb(109,151,236)	1.9917	2,2
Zfp367	Mapk11	-0.97168	50	-0.5	rgb(110,152,236)	1.9917	2,2
Zfp395	Sh2b2	0.97168	50	0.496	rgb(222,122,123)	1.9917	2,2
Zfp414	Heatr1	-0.97168	50	-0.5	rgb(108,151,236)	1.9917	2,2
Zfp429	H60c	-0.97168	50	-0.55	rgb( 99,145,238)	1.9917	2,2
Zfp449	Tcea3	0.97168	50	0.502	rgb(223,121,122)	1.9917	2,2
Zfp516	Pmepa1	-0.97168	50	-0.5	rgb(108,151,236)	1.9917	2,2
Zfp652	Tnip3	0.97168	50	0.503	rgb(223,121,122)	1.9917	None
Zfp750	Sulf2	0.97168	50	0.505	rgb(223,121,122)	1.9917	2,2
Zfp771	Tmem158	0.97168	50	0.497	rgb(222,122,123)	1.9917	2,2
Zscan10	Exosc8	0.97168	50	0.504	rgb(223,121,122)	1.9917	None
Ahr	Rbm15	-0.9697	49.99	-0.49	rgb(111,153,236)	1.9915	None
Ahrr	Lime1	-0.9697	49.99	-0.49	rgb(112,153,235)	1.9915	2,2
Arnt2	Tnfrsf1a	-0.9697	49.99	-0.49	rgb(110,152,236)	1.9915	2,2
Batf	Hif1a	0.9697	49.99	0.487	rgb(222,124,125)	1.9915	None
Bcl11b	Capn2	0.9697	49.99	0.492	rgb(222,123,124)	1.9915	None
Bcl6	2018-09-09	0.9697	49.99	0.494	rgb(222,123,124)	1.9915	None
Casz1	Adam10	-0.9697	49.99	-0.49	rgb(111,152,236)	1.9915	2,2
Cebpg	Smad3	0.9697	49.99	0.488	rgb(222,124,125)	1.9915	None
Clock	Fam65c	0.9697	49.99	0.485	rgb(222,124,125)	1.9915	2,2
Csrnp1	Crem	0.9697	49.99	0.486	rgb(222,124,125)	1.9915	2,2
Cux1	Slamf9	0.9697	49.99	0.492	rgb(222,123,124)	1.9915	2,2
Dmrt1	Ehbp1	0.9697	49.99	0.487	rgb(222,124,125)	1.9915	None
Dpf1	Bbs5	0.9697	49.99	0.49	rgb(222,123,124)	1.9915	2,2
E2f1	Dcp2	0.9697	49.99	0.49	rgb(222,123,124)	1.9915	None
Egr2	Nsg2	0.9697	49.99	0.485	rgb(222,124,125)	1.9915	None
Elk4	Herc4	-0.9697	49.99	-0.49	rgb(110,152,236)	1.9915	None
Etv6	Ltb	0.9697	49.99	0.492	rgb(222,123,124)	1.9915	None
Fos	Kctd7	0.9697	49.99	0.49	rgb(222,123,124)	1.9915	None
Fosl1	Cdyl2	0.9697	49.99	0.489	rgb(222,124,125)	1.9915	None
Fosl1	Dgkg	0.9697	49.99	0.488	rgb(222,124,125)	1.9915	None
Fosl2	Vsig10	-0.9697	49.99	-0.49	rgb(111,153,236)	1.9915	2,2
Foxa1	Gpatch4	-0.9697	49.99	-0.49	rgb(110,152,236)	1.9915	None
Foxf2	Gnpda1	-0.9697	49.99	-0.49	rgb(112,153,235)	1.9915	2,2
Foxf2	Phlpp1	0.9697	49.99	0.489	rgb(222,124,125)	1.9915	None
Foxj1	Ppm1k	0.9697	49.99	0.494	rgb(222,123,124)	1.9915	None
Foxo3	Mgst3	0.9697	49.99	0.491	rgb(222,123,124)	1.9915	None
Foxo3	Vwa5a	0.9697	49.99	0.487	rgb(222,124,125)	1.9915	None
Foxq1	Cltb	-0.9697	49.99	-0.49	rgb(110,152,236)	1.9915	None
Gabpa	Aplp1	-0.9697	49.99	-0.49	rgb(110,152,236)	1.9915	2,2
Gata2	Ablim2	0.9697	49.99	0.492	rgb(222,123,124)	1.9915	None
Glis1	Btla	-0.9697	49.99	-0.49	rgb(112,153,235)	1.9915	2,2
Glis1	Trim9	0.9697	49.99	0.488	rgb(222,124,125)	1.9915	None
Glis2	Thoc3	0.9697	49.99	0.488	rgb(222,124,125)	1.9915	2,2
Glis3	Ldlrap1	0.9697	49.99	0.485	rgb(222,124,125)	1.9915	2,2
Hey1	Chka	0.9697	49.99	0.488	rgb(222,124,125)	1.9915	None
Hif1a	Cyp2s1	0.9697	49.99	0.49	rgb(222,123,124)	1.9915	2,2
Hif1a	Ephb2	0.9697	49.99	0.493	rgb(222,123,124)	1.9915	2,2
Hmga2	Fam19a3	-0.9697	49.99	-0.49	rgb(110,152,236)	1.9915	2,2
Hsf2	Crtam	0.9697	49.99	0.492	rgb(222,123,124)	1.9915	2,2
Irf7	Vamp2	-0.9697	49.99	-0.49	rgb(111,152,236)	1.9915	None
Jazf1	Lgals7	0.9697	49.99	0.493	rgb(222,123,124)	1.9915	2,2
Junb	Syn1	0.9697	49.99	0.493	rgb(222,123,124)	1.9915	None
Kdm5b	Ppap2c	0.9697	49.99	0.488	rgb(222,124,125)	1.9915	2,2
Klf4	Ccng2	0.9697	49.99	0.494	rgb(222,123,124)	1.9915	None
Klf7	Sars	0.9697	49.99	0.491	rgb(222,123,124)	1.9915	None
L3mbtl3	Itga3	-0.9697	49.99	-0.49	rgb(111,153,236)	1.9915	2,2
L3mbtl3	Tbxa2r	0.9697	49.99	0.488	rgb(222,124,125)	1.9915	2,2
Lcor	S100a13	0.9697	49.99	0.489	rgb(222,124,125)	1.9915	None
Lef1	Abca1	0.9697	49.99	0.494	rgb(222,123,124)	1.9915	None
Lhx6	Cyp2d22	-0.9697	49.99	-0.49	rgb(110,152,236)	1.9915	2,2
Meis1	Slc4a11	0.9697	49.99	0.486	rgb(222,124,125)	1.9915	None
Meis2	Slco4a1	0.9697	49.99	0.486	rgb(222,124,125)	1.9915	2,2
Msc	Ddx11	-0.9697	49.99	-0.49	rgb(112,153,235)	1.9915	2,2
Ncoa1	Eci1	-0.9697	49.99	-0.49	rgb(111,153,236)	1.9915	2,2
Ncoa1	Lrfn1	0.9697	49.99	0.489	rgb(222,124,125)	1.9915	2,2
Nfat5	Nkain1	0.9697	49.99	0.487	rgb(222,124,125)	1.9915	None
Nfe2	Zfp493	-0.9697	49.99	-0.49	rgb(111,153,236)	1.9915	None
Nfia	Ube2q2	-0.9697	49.99	-0.49	rgb(111,152,236)	1.9915	2,2
Nfkb1	Ankrd6	0.9697	49.99	0.494	rgb(222,123,124)	1.9915	None
Nfkb1	Pwwp2b	0.9697	49.99	0.485	rgb(222,124,125)	1.9915	None
Nr2f1	Tgtp2	-0.9697	49.99	-0.49	rgb(110,152,236)	1.9915	2,2
Rarg	Fhit	-0.9697	49.99	-0.49	rgb(112,153,235)	1.9915	None
Rbck1	Ears2	0.9697	49.99	0.489	rgb(222,124,125)	1.9915	2,2
Rest	Dlgap3	0.9697	49.99	0.495	rgb(222,122,123)	1.9915	None
Rreb1	Asnsd1	-0.9697	49.99	-0.49	rgb(110,152,236)	1.9915	None
Rreb1	Chl1	0.9697	49.99	0.494	rgb(222,123,124)	1.9915	None
Satb1	Phtf2	-0.9697	49.99	-0.49	rgb(111,153,236)	1.9915	2,2
Six5	Shroom3	-0.9697	49.99	-0.49	rgb(111,152,236)	1.9915	2,2
Smad3	Casp3	-0.9697	49.99	-0.49	rgb(110,152,236)	1.9915	2,2
Smad3	Cttn	0.9697	49.99	0.491	rgb(222,123,124)	1.9915	None
Sox5	Rgs1	0.9697	49.99	0.489	rgb(222,124,125)	1.9915	None
Sox5	Srpk2	0.9697	49.99	0.486	rgb(222,124,125)	1.9915	None
Sp140	Slc13a3	0.9697	49.99	0.488	rgb(222,124,125)	1.9915	2,2
Sp3	Grina	0.9697	49.99	0.487	rgb(222,124,125)	1.9915	2,2
Sp6	Lrp4	0.9697	49.99	0.486	rgb(222,124,125)	1.9915	2,2
Spib	Klhl6	-0.9697	49.99	-0.49	rgb(112,153,235)	1.9915	None
Srf	Dclre1a	-0.9697	49.99	-0.49	rgb(110,152,236)	1.9915	2,2
Tal2	Rbpj	-0.9697	49.99	-0.49	rgb(110,152,236)	1.9915	2,2
Tcf7l2	Dars2	0.9697	49.99	0.49	rgb(222,123,124)	1.9915	None
Tfdp2	Oxct1	0.9697	49.99	0.495	rgb(222,123,124)	1.9915	2,2
Thap1	Bcar1	-0.9697	49.99	-0.49	rgb(111,152,236)	1.9915	None
Tigd2	Plcd1	0.9697	49.99	0.494	rgb(222,123,124)	1.9915	2,2
Trp53	Ccng1	0.9697	49.99	0.491	rgb(222,123,124)	1.9915	None
Tshz2	B4galt2	0.9697	49.99	0.485	rgb(222,124,125)	1.9915	2,2
Twist1	Sema4f	0.9697	49.99	0.49	rgb(222,123,124)	1.9915	None
Twist1	Trim67	0.9697	49.99	0.487	rgb(222,124,125)	1.9915	2,2
Zbtb7b	Pcmt1	-0.9697	49.99	-0.49	rgb(110,152,236)	1.9915	None
Zeb1	Inpp4a	-0.9697	49.99	-0.49	rgb(110,152,236)	1.9915	2,2
Zeb2	Aqp3	-0.9697	49.99	-0.49	rgb(112,153,235)	1.9915	2,2
Zeb2	Dusp22	0.9697	49.99	0.628	rgb(224, 97, 98)	1.9915	2,2
Zfhx3	Cass4	0.9697	49.99	0.493	rgb(222,123,124)	1.9915	None
Zfp26	Ept1	0.9697	49.99	0.493	rgb(222,123,124)	1.9915	2,2
Zfp358	Mmp11	0.9697	49.99	0.491	rgb(222,123,124)	1.9915	2,2
Zfp365	Sulf2	0.9697	49.99	0.486	rgb(222,124,125)	1.9915	2,2
Zfp367	Pknox1	-0.9697	49.99	-0.49	rgb(111,153,236)	1.9915	2,2
Zfp467	2810459M11Rik	0.9697	49.99	0.492	rgb(222,123,124)	1.9915	None
Zfp52	Ccnd3	-0.9697	49.99	-0.49	rgb(110,152,236)	1.9915	2,2
Zfp629	Tubb6	-0.9697	49.99	-0.49	rgb(111,153,236)	1.9915	2,2
Zfp629	Zkscan17	0.9697	49.99	0.486	rgb(222,124,125)	1.9915	2,2
Zfp652	Wipf1	0.9697	49.99	0.486	rgb(222,124,125)	1.9915	2,2
Zfp868	Mnda	-0.9697	49.99	-0.49	rgb(110,152,236)	1.9915	2,2
Zfp874a	Rnf169	0.9697	49.99	0.49	rgb(222,123,124)	1.9915	2,2
Zscan10	Apitd1	0.9697	49.99	0.495	rgb(222,122,123)	1.9915	None
Zscan10	Bpnt1	0.9697	49.99	0.487	rgb(222,124,125)	1.9915	None
Zscan10	Dctpp1	0.9697	49.99	0.488	rgb(222,124,125)	1.9915	None
Zscan29	Slc25a45	0.9697	49.99	0.488	rgb(222,124,125)	1.9915	2,2
Ahrr	Gad2	0.96769	50.01	0.508	rgb(223,120,121)	1.9919	2,2
Arid3a	Erc1	0.96769	50.01	0.512	rgb(223,119,120)	1.9919	None
Atf5	Hmox1	0.96769	50.01	0.512	rgb(223,119,120)	1.9919	None
Batf	Cntnap1	-0.96769	50.01	-0.51	rgb(106,150,236)	1.9919	2,2
Bcl6	Ero1l	-0.96769	50.01	-0.51	rgb(107,150,236)	1.9919	None
Bcl6	Il1a	-0.96769	50.01	-0.51	rgb(106,149,237)	1.9919	None
Bcl6	2018-03-03	0.96769	50.01	0.509	rgb(223,120,121)	1.9919	None
Bhlhe40	Ndrg1	0.96769	50.01	0.514	rgb(223,119,120)	1.9919	2,2
Bhlhe40	St3gal1	0.96769	50.01	0.512	rgb(223,119,120)	1.9919	None
C030039L03Rik	Gck	0.96769	50.01	0.508	rgb(223,120,121)	1.9919	2,2
Cebpg	Aldh1l2	0.96769	50.01	0.51	rgb(223,120,121)	1.9919	2,2
Creb1	Tmem55b	-0.96769	50.01	-0.51	rgb(107,150,236)	1.9919	None
Creb3l2	Spred3	0.96769	50.01	0.507	rgb(223,120,121)	1.9919	2,2
Ddit3	Adm2	0.96769	50.01	0.507	rgb(223,120,121)	1.9919	2,2
Dzip1	Smarca2	0.96769	50.01	0.505	rgb(223,120,121)	1.9919	2,2
E2f1	Tnk2	0.96769	50.01	0.509	rgb(223,120,121)	1.9919	None
Egr1	Egr3	0.96769	50.01	0.508	rgb(223,120,121)	1.9919	2,2
Elk3	Rora	0.96769	50.01	0.512	rgb(223,119,120)	1.9919	2,2
Elk3	Stk38l	0.96769	50.01	0.509	rgb(223,120,121)	1.9919	None
Eomes	Chm	-0.96769	50.01	-0.51	rgb(107,150,236)	1.9919	None
Fosl2	Tgm2	0.96769	50.01	0.508	rgb(223,120,121)	1.9919	2,2
Foxf2	Sdc1	0.96769	50.01	0.506	rgb(223,120,121)	1.9919	2,2
Foxo3	Map3k1	0.96769	50.01	0.508	rgb(223,120,121)	1.9919	None
Foxs1	Sh2d7	0.96769	50.01	0.515	rgb(223,119,120)	1.9919	2,2
Gata3	Nrgn	0.96769	50.01	0.51	rgb(223,120,121)	1.9919	2,2
Gfi1	Bpnt1	-0.96769	50.01	-0.51	rgb(107,150,236)	1.9919	2,2
Hic1	Nr4a3	-0.96769	50.01	-0.51	rgb(107,150,236)	1.9919	None
Hlx	Olfm1	0.96769	50.01	0.512	rgb(223,119,120)	1.9919	2,2
Hmgb3	Pla2g4f	0.96769	50.01	0.51	rgb(223,120,121)	1.9919	2,2
Hsf1	Son	0.96769	50.01	0.509	rgb(223,120,121)	1.9919	None
Ikzf2	Ddr1	-0.96769	50.01	-0.51	rgb(105,149,237)	1.9919	None
Ikzf2	Olfm2	0.96769	50.01	0.506	rgb(223,120,121)	1.9919	2,2
Irf1	Gbp10	0.96769	50.01	0.512	rgb(223,119,120)	1.9919	2,2
Irf2	Rbms2	0.96769	50.01	0.51	rgb(223,120,121)	1.9919	None
Irf4	Adarb1	0.96769	50.01	0.512	rgb(223,119,120)	1.9919	None
Irf4	Phtf2	-0.96769	50.01	-0.51	rgb(107,150,236)	1.9919	None
Irf4	Ptprf	0.96769	50.01	0.513	rgb(223,119,120)	1.9919	2,2
Irf4	Sesn1	-0.96769	50.01	-0.51	rgb(106,150,236)	1.9919	None
Irf4	Synpo	0.96769	50.01	0.509	rgb(223,120,121)	1.9919	None
Irf5	Cdc14a	0.96769	50.01	0.512	rgb(223,119,120)	1.9919	None
Irf7	Ccl5	0.96769	50.01	0.508	rgb(223,120,121)	1.9919	2,2
Irf7	Gm6548	0.96769	50.01	0.51	rgb(223,120,121)	1.9919	2,2
Irf8	Synpo	0.96769	50.01	0.506	rgb(223,120,121)	1.9919	None
Kdm2b	Lrch1	0.96769	50.01	0.511	rgb(223,119,120)	1.9919	2,2
Klf10	Smurf2	0.96769	50.01	0.515	rgb(223,119,120)	1.9919	2,2
Klf2	Nkain1	-0.96769	50.01	-0.51	rgb(107,150,236)	1.9919	None
Klf4	Ccno	0.96769	50.01	0.511	rgb(223,119,121)	1.9919	None
Klf7	Gusb	-0.96769	50.01	-0.51	rgb(107,150,236)	1.9919	2,2
Maf	Ctla4	0.96769	50.01	0.506	rgb(223,120,121)	1.9919	None
Maf	Rorc	0.96769	50.01	0.509	rgb(223,120,121)	1.9919	None
Msc	Klrk1	0.96769	50.01	0.512	rgb(223,119,120)	1.9919	2,2
Mxd3	Zdhhc2	0.96769	50.01	0.51	rgb(223,120,121)	1.9919	2,2
Ncoa2	Notch2	0.96769	50.01	0.506	rgb(223,120,121)	1.9919	2,2
Nfic	Klf13	0.96769	50.01	0.515	rgb(223,119,120)	1.9919	None
Nfkb1	Themis	-0.96769	50.01	-0.51	rgb(106,150,236)	1.9919	None
Nfkb2	Tspan3	0.96769	50.01	0.509	rgb(223,120,121)	1.9919	2,2
Nr4a2	Rel	0.96769	50.01	0.509	rgb(223,120,121)	1.9919	2,2
Nr4a2	Serpine2	0.96769	50.01	0.509	rgb(223,120,121)	1.9919	None
Ovol2	Sgip1	0.96769	50.01	0.505	rgb(223,121,122)	1.9919	2,2
Plagl1	Adora2a	0.96769	50.01	0.506	rgb(223,120,121)	1.9919	2,2
Plagl1	Eml1	0.96769	50.01	0.506	rgb(223,120,121)	1.9919	2,2
Plagl1	S1pr2	-0.96769	50.01	-0.51	rgb(107,150,236)	1.9919	2,2
Prdm1	Ccno	0.96769	50.01	0.511	rgb(223,119,121)	1.9919	None
Rfx1	Samsn1	-0.96769	50.01	-0.51	rgb(106,149,236)	1.9919	None
Scrt1	Myo3b	0.96769	50.01	0.508	rgb(223,120,121)	1.9919	None
Smad3	Sorl1	0.96769	50.01	0.515	rgb(223,119,120)	1.9919	None
Sox5	Ccr8	-0.96769	50.01	-0.51	rgb(106,150,236)	1.9919	2,2
Sox5	Gem	0.96769	50.01	0.509	rgb(223,120,121)	1.9919	2,2
Sp2	Ckmt1	-0.96769	50.01	-0.51	rgb(106,149,236)	1.9919	None
Sp2	Mgmt	-0.96769	50.01	-0.51	rgb(105,149,237)	1.9919	None
Sp2	Tab2	0.96769	50.01	0.505	rgb(223,120,121)	1.9919	None
Sp2	Urb1	0.96769	50.01	0.506	rgb(223,120,121)	1.9919	None
Sp2	Zfp609	0.96769	50.01	0.514	rgb(223,119,120)	1.9919	None
Sp4	Kdelc1	-0.96769	50.01	-0.51	rgb(105,149,237)	1.9919	None
Sp4	Klf7	0.96769	50.01	0.507	rgb(223,120,121)	1.9919	None
Sp6	Marcks	0.96769	50.01	0.513	rgb(223,119,120)	1.9919	None
Srebf1	Aacs	0.96769	50.01	0.513	rgb(223,119,120)	1.9919	2,2
Srebf1	Mical1	0.96769	50.01	0.511	rgb(223,119,120)	1.9919	None
Srebf1	Sesn1	0.96769	50.01	0.513	rgb(223,119,120)	1.9919	None
Srf	Exosc8	-0.96769	50.01	-0.51	rgb(106,150,236)	1.9919	None
Tcf12	Pkp4	0.96769	50.01	0.507	rgb(223,120,121)	1.9919	None
Tcf3	Mllt6	0.96769	50.01	0.513	rgb(223,119,120)	1.9919	None
Tcf3	Ttyh3	0.96769	50.01	0.51	rgb(223,120,121)	1.9919	None
Tead1	Nav2	0.96769	50.01	0.512	rgb(223,119,120)	1.9919	None
Thap1	Pacs1	-0.96769	50.01	-0.51	rgb(106,149,236)	1.9919	2,2
Thap1	Rpa2	0.96769	50.01	0.51	rgb(223,120,121)	1.9919	None
Thra	Nr1d1	0.96769	50.01	0.507	rgb(223,120,121)	1.9919	2,2
Topors	Ifi27l2a	-0.96769	50.01	-0.51	rgb(107,150,236)	1.9919	None
Tulp3	Il2ra	0.96769	50.01	0.51	rgb(223,120,121)	1.9919	2,2
Yy2	Fancm	0.96769	50.01	0.509	rgb(223,120,121)	1.9919	None
Yy2	Mtx3	0.96769	50.01	0.512	rgb(223,119,120)	1.9919	None
Zbtb4	Pkhd1l1	0.96769	50.01	0.512	rgb(223,119,120)	1.9919	None
Zbtb5	Rab33a	-0.96769	50.01	-0.51	rgb(105,149,237)	1.9919	2,2
Zfp263	Lrp12	0.96769	50.01	0.512	rgb(223,119,120)	1.9919	None
Zfp263	Sytl2	0.96769	50.01	0.514	rgb(223,119,120)	1.9919	None
Zfp263	Zfp473	-0.96769	50.01	-0.51	rgb(107,150,236)	1.9919	None
Zfp281	Fas	0.96769	50.01	0.514	rgb(223,119,120)	1.9919	None
Zfp369	5730508B09Rik	-0.96769	50.01	-0.51	rgb(106,150,236)	1.9919	None
Zfp385a	Ptp4a3	0.96769	50.01	0.51	rgb(223,120,121)	1.9919	2,2
Zfp429	Plod3	-0.96769	50.01	-0.51	rgb(107,150,236)	1.9919	2,2
Zfp429	Trim12a	0.96769	50.01	0.51	rgb(223,120,121)	1.9919	2,2
Zfp467	Stk39	0.96769	50.01	0.51	rgb(223,120,121)	1.9919	None
Zfp473	Slfn2	-0.96769	50.01	-0.51	rgb(105,149,237)	1.9919	2,2
Zfp629	Fgfr1	0.96769	50.01	0.506	rgb(223,120,121)	1.9919	2,2
Zfp629	Tbc1d16	0.96769	50.01	0.515	rgb(223,119,120)	1.9919	2,2
Zfp750	Mex3d	-0.96769	50.01	-0.51	rgb(105,149,237)	1.9919	2,2
Zfp750	Pik3r3	0.96769	50.01	0.506	rgb(223,120,121)	1.9919	2,2
Zkscan17	Eef2k	0.96769	50.01	0.512	rgb(223,119,120)	1.9919	2,2
Ahdc1	Zfp831	0.96587	50	0.498	rgb(222,122,123)	1.9917	2,2
Ahr	Slc1a4	0.96587	50	0.505	rgb(223,121,122)	1.9917	None
Atf5	Slc3a2	0.96587	50	0.496	rgb(222,122,123)	1.9917	None
Bcl6	Nr1d1	0.96587	50	0.503	rgb(223,121,122)	1.9917	2,2
Bhlhe40	Anln	0.96587	50	0.502	rgb(223,121,122)	1.9917	None
C030039L03Rik	Kbtbd13	0.96587	50	0.496	rgb(222,122,123)	1.9917	2,2
Cebpg	Drosha	-0.96587	50	-0.5	rgb(108,151,236)	1.9917	2,2
Cebpg	Thap4	-0.96587	50	-0.5	rgb(109,151,236)	1.9917	2,2
Creb3l2	Slc4a8	0.96587	50	0.5	rgb(223,121,122)	1.9917	2,2
Cux1	Ss18	0.96587	50	0.497	rgb(222,122,123)	1.9917	2,2
Ddit3	Slc19a2	-0.96587	50	-0.5	rgb(109,151,236)	1.9917	None
Drap1	Fth1	0.96587	50	0.501	rgb(223,121,122)	1.9917	2,2
Egr1	Hook2	-0.96587	50	-0.5	rgb(109,152,236)	1.9917	None
Egr2	Tnfrsf12a	0.96587	50	0.505	rgb(223,121,122)	1.9917	None
Elf1	C330018D20Rik	-0.96587	50	-0.5	rgb(108,151,236)	1.9917	None
Elf1	Themis	0.96587	50	0.5	rgb(223,121,122)	1.9917	None
Erf	Zfp36l2	0.96587	50	0.498	rgb(222,122,123)	1.9917	None
Esrra	Gcnt1	-0.96587	50	-0.5	rgb(108,151,236)	1.9917	None
Esrra	Ric8	0.96587	50	0.501	rgb(223,121,122)	1.9917	2,2
Etv4	Mboat7	0.96587	50	0.498	rgb(222,122,123)	1.9917	2,2
Etv6	Il12rb1	0.96587	50	0.503	rgb(223,121,122)	1.9917	2,2
Fosb	Entpd1	-0.96587	50	-0.5	rgb(108,151,236)	1.9917	None
Hic1	Ggta1	0.96587	50	0.496	rgb(222,122,123)	1.9917	None
Hic1	Sap30	-0.96587	50	-0.5	rgb(108,151,236)	1.9917	None
Hif1a	Satb1	0.96587	50	0.5	rgb(222,122,123)	1.9917	2,2
Hsf1	BC065397	0.96587	50	0.502	rgb(223,121,122)	1.9917	None
Irf1	Il15ra	0.96587	50	0.496	rgb(222,122,123)	1.9917	2,2
Irf1	Tmem35	0.96587	50	0.499	rgb(222,122,123)	1.9917	None
Irf2	Zbp1	0.96587	50	0.498	rgb(222,122,123)	1.9917	None
Irf4	Ddx60	-0.96587	50	-0.5	rgb(108,151,236)	1.9917	None
Irf4	Grpr	-0.96587	50	-0.5	rgb(110,152,236)	1.9917	2,2
Irf4	Nqo2	-0.96587	50	-0.5	rgb(108,151,236)	1.9917	None
Irf4	Rufy3	-0.96587	50	-0.5	rgb(109,151,236)	1.9917	None
Irf8	Plod3	0.96587	50	0.505	rgb(223,121,122)	1.9917	None
Jun	Fam129b	0.96587	50	0.5	rgb(223,121,122)	1.9917	None
Kdm2b	Adora2a	0.96587	50	0.496	rgb(222,122,123)	1.9917	2,2
Kdm2b	Crispld2	-0.96587	50	-0.5	rgb(108,151,236)	1.9917	2,2
Kdm5b	Pfkp	0.96587	50	0.498	rgb(222,122,123)	1.9917	2,2
Klf13	Phlda3	-0.96587	50	-0.5	rgb(109,151,236)	1.9917	2,2
Klf3	Hk2	-0.96587	50	-0.5	rgb(108,151,236)	1.9917	None
Maf	Ctla2b	0.96587	50	0.502	rgb(223,121,122)	1.9917	None
Maf	Gbp8	-0.96587	50	-0.5	rgb(108,151,236)	1.9917	None
Mafg	Sesn1	-0.96587	50	-0.5	rgb(108,151,236)	1.9917	None
Mef2b	Mapk13	0.96587	50	0.497	rgb(222,122,123)	1.9917	2,2
Msc	Ccr1	0.96587	50	0.499	rgb(222,122,123)	1.9917	2,2
Mxd1	Smyd5	-0.96587	50	-0.5	rgb(109,151,236)	1.9917	2,2
Mybl1	E2f7	0.96587	50	0.496	rgb(222,122,123)	1.9917	2,2
Nfil3	Epn2	0.96587	50	0.498	rgb(222,122,123)	1.9917	2,2
Nfkb2	Mex3b	0.96587	50	0.5	rgb(222,122,123)	1.9917	2,2
Nr4a2	Mmd	0.96587	50	0.502	rgb(223,121,122)	1.9917	None
Phf1	Znrf1	0.96587	50	0.499	rgb(222,122,123)	1.9917	2,2
Plagl1	Fam178b	0.96587	50	0.498	rgb(222,122,123)	1.9917	2,2
Prrx1	Thbd	0.96587	50	0.5	rgb(223,121,122)	1.9917	2,2
Rest	Hk1	0.96587	50	0.495	rgb(222,122,123)	1.9917	None
Rest	Kcnh4	0.96587	50	0.497	rgb(222,122,123)	1.9917	None
Runx2	Siah3	0.96587	50	0.498	rgb(222,122,123)	1.9917	None
Rxra	Aig1	-0.96587	50	-0.5	rgb(109,151,236)	1.9917	None
Rxra	Tmc6	0.96587	50	0.501	rgb(223,121,122)	1.9917	None
Scml4	Pten	0.96587	50	0.495	rgb(222,122,123)	1.9917	2,2
Scrt1	Smox	0.96587	50	0.504	rgb(223,121,122)	1.9917	None
Six5	Arhgef17	0.96587	50	0.501	rgb(223,121,122)	1.9917	2,2
Sox5	Timp1	0.96587	50	0.498	rgb(222,122,123)	1.9917	2,2
Sp110	Dpp4	-0.96587	50	-0.5	rgb(108,151,236)	1.9917	None
Sp2	Zfp318	0.96587	50	0.5	rgb(222,122,123)	1.9917	None
Sp4	Acox3	0.96587	50	0.503	rgb(223,121,122)	1.9917	None
Sp4	Boll	0.96587	50	0.497	rgb(222,122,123)	1.9917	None
Sp6	Plxnd1	0.96587	50	0.498	rgb(222,122,123)	1.9917	None
Srebf1	Sh3kbp1	-0.96587	50	-0.5	rgb(109,152,236)	1.9917	None
Stat4	Crem	0.96587	50	0.498	rgb(222,122,123)	1.9917	None
Stat4	Tgfbr1	-0.96587	50	-0.5	rgb(108,151,236)	1.9917	2,2
Tal2	Stat4	0.96587	50	0.503	rgb(223,121,122)	1.9917	None
Tcf7l1	Gabbr1	0.96587	50	0.495	rgb(222,122,123)	1.9917	None
Tead1	Nedd9	-0.96587	50	-0.5	rgb(109,152,236)	1.9917	None
Vax2	Ndst1	0.96587	50	0.496	rgb(222,122,123)	1.9917	None
Zbtb4	Ppap2a	-0.96587	50	-0.5	rgb(109,151,236)	1.9917	2,2
Zbtb6	Cstf2t	0.96587	50	0.501	rgb(223,121,122)	1.9917	2,2
Zbtb7a	Adap1	0.96587	50	0.498	rgb(222,122,123)	1.9917	None
Zbtb7a	Hmgn1	-0.96587	50	-0.5	rgb(109,151,236)	1.9917	None
Zfhx3	Heg1	0.96587	50	0.503	rgb(223,121,122)	1.9917	2,2
Zfp148	Sbf2	0.96587	50	0.5	rgb(223,121,122)	1.9917	None
Zfp219	Irf5	0.96587	50	0.504	rgb(223,121,122)	1.9917	2,2
Zfp219	Mt2	-0.96587	50	-0.5	rgb(108,151,236)	1.9917	None
Zfp219	Sgk1	-0.96587	50	-0.5	rgb(109,151,236)	1.9917	None
Zfp263	Cyfip2	-0.96587	50	-0.5	rgb(108,150,236)	1.9917	None
Zfp263	Plagl1	-0.96587	50	-0.5	rgb(109,151,236)	1.9917	None
Zfp263	Zc3hav1l	-0.96587	50	-0.5	rgb(108,151,236)	1.9917	None
Zfp277	Zkscan17	0.96587	50	0.503	rgb(223,121,122)	1.9917	2,2
Zfp467	Tnfrsf13c	0.96587	50	0.504	rgb(223,121,122)	1.9917	2,2
Zfp473	Ppfia3	0.96587	50	0.497	rgb(222,122,123)	1.9917	2,2
Zfp524	Faim3	0.96587	50	0.5	rgb(223,121,122)	1.9917	2,2
Zfp536	Prf1	0.96587	50	0.497	rgb(222,122,123)	1.9917	2,2
Zfp652	Dlg4	0.96587	50	0.496	rgb(222,122,123)	1.9917	None
Zfp750	Dnm3os	0.96587	50	0.497	rgb(222,122,123)	1.9917	2,2
Zfp800	Smek1	0.96587	50	0.503	rgb(223,121,122)	1.9917	2,2
Zfp831	Ahdc1	0.96587	50	0.499	rgb(222,122,123)	1.9917	2,2
Zfp951	BC049715	0.96587	50	0.502	rgb(223,121,122)	1.9917	2,2
Zfp956	Slc13a3	-0.96587	50	-0.5	rgb(109,151,236)	1.9917	2,2
Zfp960	F2rl1	-0.96587	50	-0.5	rgb(109,151,236)	1.9917	2,2
Aebp2	Ephx1	-0.96383	49.98	-0.48	rgb(112,153,235)	1.9913	2,2
Aebp2	Gimap8	0.96383	49.98	0.481	rgb(222,125,126)	1.9913	2,2
Arnt2	Mllt6	0.96383	49.98	0.484	rgb(222,125,126)	1.9913	None
Bcl6	Fam120c	-0.96383	49.98	-0.48	rgb(112,153,235)	1.9913	None
Bcl6	Tnfsf8	-0.96383	49.98	-0.48	rgb(113,154,235)	1.9913	None
Bhlhe40	Apol9a	0.96383	49.98	0.483	rgb(222,125,126)	1.9913	2,2
Bhlhe40	Ifih1	-0.96383	49.98	-0.48	rgb(113,153,235)	1.9913	2,2
Bhlhe41	Apol9a	-0.96383	49.98	-0.48	rgb(113,154,235)	1.9913	2,2
Cebpg	Lmtk3	-0.96383	49.98	-0.48	rgb(113,154,235)	1.9913	None
Cebpg	Lpxn	0.96383	49.98	0.481	rgb(222,125,126)	1.9913	None
Cebpg	Traf6	0.96383	49.98	0.482	rgb(222,125,126)	1.9913	None
Cenpt	Lgals1	0.96383	49.98	0.482	rgb(222,125,126)	1.9913	2,2
Csrnp1	Stat5b	0.96383	49.98	0.477	rgb(222,126,127)	1.9913	2,2
Dbp	Efnb1	0.96383	49.98	0.481	rgb(222,125,126)	1.9913	2,2
Dmrt1	Cacnb2	-0.96383	49.98	-0.48	rgb(114,154,235)	1.9913	2,2
Dpf1	Rbfox2	0.96383	49.98	0.573	rgb(223,108,109)	1.9913	2,2
Dzip1	Ptk2	0.96383	49.98	0.479	rgb(222,126,126)	1.9913	2,2
Egr2	Nav2	0.96383	49.98	0.481	rgb(222,125,126)	1.9913	None
Egr2	Sco1	-0.96383	49.98	-0.48	rgb(113,153,235)	1.9913	None
Esrra	Ptger2	0.96383	49.98	0.477	rgb(222,126,127)	1.9913	None
Fosl1	Sec14l1	0.96383	49.98	0.476	rgb(222,126,127)	1.9913	2,2
Foxf2	Tapbpl	0.96383	49.98	0.48	rgb(222,125,126)	1.9913	2,2
Foxo1	Bcl2l1	-0.96383	49.98	-0.48	rgb(113,154,235)	1.9913	None
Foxp1	Adam9	-0.96383	49.98	-0.48	rgb(112,153,235)	1.9913	2,2
Gata1	Endou	0.96383	49.98	0.477	rgb(222,126,127)	1.9913	2,2
Gata3	Lhfp	0.96383	49.98	0.483	rgb(222,125,126)	1.9913	2,2
Gata3	Lsp1	-0.96383	49.98	-0.48	rgb(112,153,235)	1.9913	2,2
Gata3	Rasgrp1	0.96383	49.98	0.481	rgb(222,125,126)	1.9913	None
Gm13157	Megf8	-0.96383	49.98	-0.48	rgb(113,154,235)	1.9913	2,2
Hdx	Slco5a1	0.96383	49.98	0.482	rgb(222,125,126)	1.9913	None
Hhex	Rxra	0.96383	49.98	0.477	rgb(222,126,127)	1.9913	2,2
Hif1a	Kbtbd13	0.96383	49.98	0.476	rgb(222,126,127)	1.9913	2,2
Hif1a	Muc2	0.96383	49.98	0.485	rgb(222,124,125)	1.9913	2,2
Hif1a	Rab33a	0.96383	49.98	0.475	rgb(222,126,127)	1.9913	2,2
Hmg20b	Pde10a	0.96383	49.98	0.485	rgb(222,124,125)	1.9913	2,2
Hmg20b	Phlpp1	0.96383	49.98	0.479	rgb(222,125,126)	1.9913	None
Ikzf2	4930528A17Rik	0.96383	49.98	0.476	rgb(222,126,127)	1.9913	None
Ikzf2	Sepp1	0.96383	49.98	0.477	rgb(222,126,127)	1.9913	None
Irf9	Cyth1	0.96383	49.98	0.483	rgb(222,125,126)	1.9913	None
Jun	Wwtr1	0.96383	49.98	0.482	rgb(222,125,126)	1.9913	2,2
Klf12	Pmm1	0.96383	49.98	0.484	rgb(222,125,126)	1.9913	None
Klf4	Fkbp11	0.96383	49.98	0.483	rgb(222,125,126)	1.9913	2,2
Klf4	Socs3	0.96383	49.98	0.481	rgb(222,125,126)	1.9913	None
Meis2	Cmtm8	0.96383	49.98	0.484	rgb(222,125,125)	1.9913	None
Mybl1	Slc43a2	0.96383	49.98	0.483	rgb(222,125,126)	1.9913	2,2
Nfat5	Ehd4	0.96383	49.98	0.482	rgb(222,125,126)	1.9913	None
Nfat5	Nrip1	0.96383	49.98	0.484	rgb(222,125,126)	1.9913	None
Nfat5	Rel	0.96383	49.98	0.482	rgb(222,125,126)	1.9913	None
Nfia	Mgll	-0.96383	49.98	-0.48	rgb(112,153,235)	1.9913	2,2
Nfkb2	Arhgef40	0.96383	49.98	0.483	rgb(222,125,126)	1.9913	None
Nr3c1	Clec2g	0.96383	49.98	0.484	rgb(222,124,125)	1.9913	None
Nr3c1	Gys1	-0.96383	49.98	-0.48	rgb(114,154,235)	1.9913	None
Nr3c1	Hexb	-0.96383	49.98	-0.48	rgb(113,154,235)	1.9913	None
Nr4a3	Skap2	0.96383	49.98	0.479	rgb(222,125,126)	1.9913	2,2
Pcgf2	Dcakd	0.96383	49.98	0.482	rgb(222,125,126)	1.9913	2,2
Pou3f1	Tubgcp5	0.96383	49.98	0.484	rgb(222,124,125)	1.9913	None
Prdm2	Bcor	0.96383	49.98	0.478	rgb(222,126,127)	1.9913	2,2
Relb	Ier3	0.96383	49.98	0.477	rgb(222,126,127)	1.9913	None
Rfx3	Parp8	-0.96383	49.98	-0.48	rgb(112,153,235)	1.9913	None
Rora	Slc9a9	0.96383	49.98	0.479	rgb(222,125,126)	1.9913	None
Rreb1	Parp8	0.96383	49.98	0.484	rgb(222,125,126)	1.9913	None
Runx1	Maged2	0.96383	49.98	0.477	rgb(222,126,127)	1.9913	None
Rxra	Trim9	0.96383	49.98	0.482	rgb(222,125,126)	1.9913	None
Satb1	Fndc3a	0.96383	49.98	0.48	rgb(222,125,126)	1.9913	2,2
Satb1	Ifi203	-0.96383	49.98	-0.48	rgb(113,153,235)	1.9913	2,2
Sgsm2	Dlg3	0.96383	49.98	0.481	rgb(222,125,126)	1.9913	2,2
Sgsm2	Nsmaf	0.96383	49.98	0.476	rgb(222,126,127)	1.9913	2,2
Six1	Serpinb6b	0.96383	49.98	0.482	rgb(222,125,126)	1.9913	None
Smad3	Foxo1	0.96383	49.98	0.476	rgb(222,126,127)	1.9913	2,2
Smad3	Pmepa1	0.96383	49.98	0.479	rgb(222,126,126)	1.9913	None
Smad3	Tmeff1	0.96383	49.98	0.481	rgb(222,125,126)	1.9913	None
Smad3	Txk	0.96383	49.98	0.478	rgb(222,126,127)	1.9913	None
Smad4	Notch1	0.96383	49.98	0.483	rgb(222,125,126)	1.9913	None
Snai3	Pmepa1	0.96383	49.98	0.482	rgb(222,125,126)	1.9913	None
Sp140	Mboat7	0.96383	49.98	0.478	rgb(222,126,127)	1.9913	2,2
Srf	Bend4	0.96383	49.98	0.482	rgb(222,125,126)	1.9913	None
Stat3	Acoxl	-0.96383	49.98	-0.48	rgb(114,154,235)	1.9913	None
Stat4	Narf	-0.96383	49.98	-0.48	rgb(112,153,235)	1.9913	2,2
Tcf12	Slc6a6	0.96383	49.98	0.481	rgb(222,125,126)	1.9913	None
Tcf3	Bfsp2	0.96383	49.98	0.477	rgb(222,126,127)	1.9913	None
Tcf7l1	C2cd3	0.96383	49.98	0.479	rgb(222,126,126)	1.9913	None
Tcf7l1	Slc3a2	-0.96383	49.98	-0.48	rgb(113,153,235)	1.9913	None
Tcf7l2	Narf	0.96383	49.98	0.481	rgb(222,125,126)	1.9913	None
Tet2	Ccl9	-0.96383	49.98	-0.48	rgb(112,153,235)	1.9913	2,2
Thap3	Cdkn1b	0.96383	49.98	0.482	rgb(222,125,126)	1.9913	2,2
Trerf1	Antxr2	0.96383	49.98	0.48	rgb(222,125,126)	1.9913	None
Trp53	Zmat3	0.96383	49.98	0.479	rgb(222,126,127)	1.9913	None
Ybx2	Fam198a	0.96383	49.98	0.482	rgb(222,125,126)	1.9913	2,2
Zbtb33	Il4ra	0.96383	49.98	0.477	rgb(222,126,127)	1.9913	None
Zfp111	Gucy1a3	0.96383	49.98	0.477	rgb(222,126,127)	1.9913	2,2
Zfp148	Bahcc1	0.96383	49.98	0.478	rgb(222,126,127)	1.9913	2,2
Zfp148	Zfp36l2	0.96383	49.98	0.478	rgb(222,126,127)	1.9913	None
Zfp182	Cd96	-0.96383	49.98	-0.48	rgb(114,154,235)	1.9913	2,2
Zfp182	Serpinb1a	0.96383	49.98	0.476	rgb(222,126,127)	1.9913	None
Zfp182	Tmtc4	0.96383	49.98	0.476	rgb(222,126,127)	1.9913	None
Zfp219	Flna	-0.96383	49.98	-0.48	rgb(113,154,235)	1.9913	None
Zfp280b	Rnf150	0.96383	49.98	0.475	rgb(222,126,127)	1.9913	2,2
Zfp296	Itpr3	-0.96383	49.98	-0.48	rgb(113,154,235)	1.9913	2,2
Zfp35	Dhrs4	0.96383	49.98	0.479	rgb(222,125,126)	1.9913	2,2
Zfp385a	Plxna1	0.96383	49.98	0.484	rgb(222,125,126)	1.9913	2,2
Zfp414	Rab4b	0.96383	49.98	0.483	rgb(222,125,126)	1.9913	2,2
Zfp426	Grp	0.96383	49.98	0.484	rgb(222,125,126)	1.9913	2,2
Zfp473	Gpt2	0.96383	49.98	0.482	rgb(222,125,126)	1.9913	2,2
Zfp511	Echdc3	-0.96383	49.98	-0.48	rgb(114,154,235)	1.9913	2,2
Zfp667	Ing2	0.96383	49.98	0.477	rgb(222,126,127)	1.9913	2,2
Zfp768	Neo1	0.96383	49.98	0.485	rgb(222,124,125)	1.9913	2,2
Zfp868	Orm2	0.96383	49.98	0.479	rgb(222,126,127)	1.9913	2,2
Zfp956	D130043K22Rik	0.96383	49.98	0.479	rgb(222,125,126)	1.9913	2,2
Zscan2	Pik3ip1	0.96383	49.98	0.479	rgb(222,126,127)	1.9913	2,2
Aebp2	Syn1	0.96154	49.97	0.473	rgb(222,127,128)	1.9911	2,2
Aebp2	Zdhhc15	-0.96154	49.97	-0.47	rgb(115,155,235)	1.9911	2,2
Ahrr	Gstm1	0.96154	49.97	0.467	rgb(222,128,129)	1.9911	2,2
Bach1	Aff3	-0.96154	49.97	-0.47	rgb(115,155,235)	1.9911	None
Batf	Lpp	0.96154	49.97	0.469	rgb(222,128,128)	1.9911	None
Bcl11b	Itsn1	0.96154	49.97	0.468	rgb(222,128,128)	1.9911	2,2
Bcl6	9030617O03Rik	-0.96154	49.97	-0.47	rgb(116,155,235)	1.9911	None
Bcl6	Pcbp4	0.96154	49.97	0.465	rgb(222,128,129)	1.9911	2,2
Casz1	Mmd	-0.96154	49.97	-0.47	rgb(115,155,235)	1.9911	2,2
Creb5	Adora2a	0.96154	49.97	0.474	rgb(222,126,127)	1.9911	2,2
Crem	Idi1	-0.96154	49.97	-0.47	rgb(115,155,235)	1.9911	None
Cxxc5	Tmod1	0.96154	49.97	0.473	rgb(222,127,128)	1.9911	2,2
Dmrt1	Chst3	0.96154	49.97	0.472	rgb(222,127,128)	1.9911	2,2
Dpf1	Syngr3	0.96154	49.97	0.475	rgb(222,126,127)	1.9911	2,2
Ebf1	Anxa3	-0.96154	49.97	-0.47	rgb(114,155,235)	1.9911	None
Egr1	Polr3b	-0.96154	49.97	-0.47	rgb(114,154,235)	1.9911	None
Elk3	Gemin6	-0.96154	49.97	-0.47	rgb(115,155,235)	1.9911	2,2
Fosl1	Cxcr2	0.96154	49.97	0.472	rgb(222,127,128)	1.9911	None
Foxa1	Pik3ip1	0.96154	49.97	0.47	rgb(222,127,128)	1.9911	None
Foxh1	Prkab2	0.96154	49.97	0.471	rgb(222,127,128)	1.9911	None
Foxn2	Furin	-0.96154	49.97	-0.47	rgb(115,155,235)	1.9911	2,2
Foxq1	Trat1	0.96154	49.97	0.466	rgb(222,128,129)	1.9911	None
Gata1	Cxcl3	0.96154	49.97	0.473	rgb(222,127,128)	1.9911	2,2
Gata3	Fam65c	-0.96154	49.97	-0.47	rgb(114,154,235)	1.9911	2,2
Gata3	Gpm6b	0.96154	49.97	0.472	rgb(222,127,128)	1.9911	2,2
Glis3	Helb	0.96154	49.97	0.472	rgb(222,127,128)	1.9911	2,2
Hic1	Samd1	0.96154	49.97	0.465	rgb(222,128,129)	1.9911	None
Hif1a	Osgepl1	0.96154	49.97	0.468	rgb(222,128,128)	1.9911	2,2
Hlx	Avpi1	0.96154	49.97	0.468	rgb(222,128,129)	1.9911	2,2
Ikzf3	Nck2	0.96154	49.97	0.47	rgb(222,127,128)	1.9911	None
Irf2	Gbp5	0.96154	49.97	0.467	rgb(222,128,129)	1.9911	None
Irf4	Syne1	-0.96154	49.97	-0.47	rgb(115,155,235)	1.9911	None
Irf4	Treml2	-0.96154	49.97	-0.47	rgb(116,156,235)	1.9911	None
Irf9	I830012O16Rik	0.96154	49.97	0.473	rgb(222,127,128)	1.9911	2,2
Jund	Ablim2	0.96154	49.97	0.466	rgb(222,128,129)	1.9911	None
Jund	Tpm2	0.96154	49.97	0.474	rgb(222,127,127)	1.9911	None
Klf10	Tgfbr1	0.96154	49.97	0.474	rgb(222,126,127)	1.9911	2,2
Klf12	Papss1	0.96154	49.97	0.474	rgb(222,127,127)	1.9911	None
Klf12	Skap2	0.96154	49.97	0.465	rgb(222,128,129)	1.9911	None
Klf4	Eif4ebp1	0.96154	49.97	0.467	rgb(222,128,129)	1.9911	None
Klf4	Parp16	0.96154	49.97	0.467	rgb(222,128,129)	1.9911	2,2
Klf4	Zfp575	0.96154	49.97	0.466	rgb(222,128,129)	1.9911	None
Lhx5	Nrp1	0.96154	49.97	0.469	rgb(222,128,128)	1.9911	None
Lhx6	Mab21l2	0.96154	49.97	0.469	rgb(222,127,128)	1.9911	2,2
Litaf	Pacsin1	0.96154	49.97	0.472	rgb(222,127,128)	1.9911	2,2
Lyl1	Gprasp2	0.96154	49.97	0.474	rgb(222,126,127)	1.9911	2,2
Mga	Atp2b4	0.96154	49.97	0.467	rgb(222,128,129)	1.9911	2,2
Mxd1	F730043M19Rik	0.96154	49.97	0.466	rgb(222,128,129)	1.9911	2,2
Mxd1	Rragd	0.96154	49.97	0.467	rgb(222,128,129)	1.9911	2,2
Ncoa3	Snx9	-0.96154	49.97	-0.47	rgb(116,156,235)	1.9911	2,2
Nfat5	Filip1l	0.96154	49.97	0.465	rgb(222,128,129)	1.9911	None
Nfat5	Soat2	-0.96154	49.97	-0.47	rgb(114,154,235)	1.9911	2,2
Nhlh1	Sorcs2	0.96154	49.97	0.468	rgb(222,128,128)	1.9911	2,2
Nr1d1	Fhod3	0.96154	49.97	0.467	rgb(222,128,129)	1.9911	None
Nr1d1	Impg2	0.96154	49.97	0.47	rgb(222,127,128)	1.9911	None
Nr2f1	Gpr56	-0.96154	49.97	-0.47	rgb(114,154,235)	1.9911	2,2
Nr3c1	Mtx3	0.96154	49.97	0.47	rgb(222,127,128)	1.9911	None
Nr3c1	Qtrtd1	0.96154	49.97	0.467	rgb(222,128,129)	1.9911	None
[truncated: 51,368 more rows]
