# Supplementary material for: Leveraging chromatin accessibility for transcriptional regulatory network inference in T Helper 17 Cells
Source: Genome Res. 2019 Mar;29(3):449–63. doi: 10.1101/gr.238253.118 (PMC6396413; doi:10.1101/gr.238253.118)
Supplement: Supplemental Material [file supp_gr.238253.118_Supplemental_Table_S6.xlsx]

## Sheet: ChIP_A17_KOall_ATh_bias50_maxCo
Table S6. TF target enrichment in GWAS phenotype genes.
TF	GeneSet_ID	GeneSetName	#Set genes	#TF targets	# in overlap	P_raw	P_adj	EnrichedGenes
Irf1	27015805	Parental_extreme_longevity_(95_years_and_older)	32	178	8	9.19767e-10	0.000540694	Gbp10 Gbp11 Gbp4 Gbp6 Gbp9 Grhl2 Nrp1 Psd3
Stat3	18758464_26192919_28067908_17068223_27569725_23128233_28008999	Inflammatory_bowel_disease	130	479	19	3.44886e-09	0.00202744	Cd226 Fcgr3 Fosl2 Galc Gpr65 Hormad2 Il10 Il23r Litaf Lpp Lpxn Map3k8 Ptpn2 Rorc Sbno2 Skap2 Smad3 Sox5 Tnfsf15
Foxb1	18758464_26192919_28067908_17068223_27569725_23128233_28008999	Inflammatory_bowel_disease	130	171	11	7.10153e-08	0.0417469	Ankrd55 Cd28 Galc Il10 Il18r1 Il23r Il2ra Impg2 Ipmk Sema6d Sox5
Stat3	21297633_24837172_26192919_28067908_23511034_19122664_19915572_20848476_25082827_23128233_20228798_20228799_19915573_28008999	Ulcerative_colitis	85	479	14	8.68312e-08	0.0510443	Cd226 Fcgr3 Gpr65 Hormad2 Il10 Il23r Litaf Map3k8 Plcl1 Ptpn2 Rorc Smad3 Tnfsf15 Zfp90
Stat3	22293688_18587394_17554261_28067908_26891255_23850713_22412388_17554300_26192919_20570966_17684544_23266558_17435756_22936669_23128233_17804789_21102463_17447842_28008999	Crohn's_disease	113	479	16	9.42631e-08	0.0554131	Dnmt3a Fcgr3 Gpr65 Hormad2 Il23r Jak2 Litaf Lpp Map3k8 Plcl1 Ptpn2 Rorc Sbno2 Skap2 Smad3 Tnfsf15
Stat1	29875488_28240269	Blood_protein_levels	620	280	30	1.04695e-07	0.0615454	Arhgef3 B3gnt8 B4galt1 C3 Clic5 Col18a1 Cst3 Ctsb Ctss Fgf2 Icam1 Ifi203 Ifi204 Ifi205 Il18r1 Lpp Mapkapk2 Mmp10 Mpzl3 Nqo2 Nrp2 Pde4a Pltp Procr Reep3 Sell St3gal1 Tgfbi Tmprss6 Treml2
Nfkb2	26974007	Chronic_inflammatory_diseases_(ankylosing_spondylitis,_Crohn's_disease,_psoriasis,_primary_sclerosing_cholangitis,_ulcerative_colitis)_(pleiotropy)	93	199	10	1.20236e-07	0.0706815	Ankrd55 Antxr2 Bank1 Ets1 Il2ra Nfkb1 Prdm1 Rorc Thada Zpbp2
Ets1	27863252	Neutrophil_percentage_of_granulocytes	77	383	12	1.24703e-07	0.0733073	Bcl2 Bcl2a1b Chd7 Exoc2 Klf3 Larp4b Rasgrp4 Spsb1 Zfp365 Zfp36l2 Zfp652 Zfpm1
Rreb1	29403010_22286170_27863252	Lymphocyte_counts	96	163	9	3.16371e-07	0.18598	Dnmt3a Fam49b Ikzf3 Klf3 Lta Nfkbia Ppard Slc35d1 Zfp36l2
Fosl1	29403010_19198610_27863252	Eosinophil_counts	104	259	11	4.72786e-07	0.277928	Cdk6 Exoc2 Gata3 Ikzf2 Ikzf3 Il4ra Kdm6b Klf3 Lpp Rcl1 Trerf1
Irf7	27015805	Parental_extreme_longevity_(95_years_and_older)	32	164	6	5.05645e-07	0.297243	Gbp10 Gbp11 Gbp4 Gbp6 Gbp9 Psd3
Tcf4	27863252	Neutrophil_percentage_of_granulocytes	77	135	7	2.38746e-06	1	Bcl2 Klf3 Nfkb1 Rad52 Spsb1 Zfp365 Zfp36l2
Nfkb2	18758464_26192919_28067908_17068223_27569725_23128233_28008999	Inflammatory_bowel_disease	130	199	10	2.73708e-06	1	Ankrd55 Bank1 Ergic1 Ets1 Fermt1 H2-Aa Il2ra Rorc Thada Tnfsf15
Isl2	27863252	Lymphocyte_percentage_of_white_cells	76	92	6	3.21102e-06	1	Antxr2 Dnmt3a Hormad2 Klf12 Stxbp6 Zfp36l2
Ets1	29403010_19198610_27863252	Eosinophil_counts	104	383	12	3.42014e-06	1	Bcl2 Bcl2a1b Chd7 Exoc2 Gata3 Klf3 Rasgrp4 Rcl1 Spsb1 Zfp365 Zfp652 Zfpm1
Elf1	18758464_26192919_28067908_17068223_27569725_23128233_28008999	Inflammatory_bowel_disease	130	306	12	3.59016e-06	1	Cd226 Ergic1 Ets1 Ifih1 Il18r1 Il2ra Ipmk Ptpn2 Rgs14 Stat4 Thada Tm9sf4
Foxb1	26974007	Chronic_inflammatory_diseases_(ankylosing_spondylitis,_Crohn's_disease,_psoriasis,_primary_sclerosing_cholangitis,_ulcerative_colitis)_(pleiotropy)	93	171	8	4.01961e-06	1	Ankrd55 Erap1 Il10 Il18r1 Il23r Il2ra Tnfrsf1a Zpbp2
Epas1	27863252	Sum_eosinophil_basophil_counts	98	116	7	4.40641e-06	1	Brd3 Cd200r1 Klf3 Nfatc2 Ptprc Rasgrp4 Spsb1
Foxs1	20585324	Conduct_disorder	5	133	3	4.4679e-06	1	Arhgap22 Cc2d2a Rnf150
Nr4a2	27863252	Lymphocyte_percentage_of_white_cells	76	98	6	4.64189e-06	1	Acoxl Cdk6 Il1rn Itga4 Nfkb1 Traf3
Tcf4	29403010_22558069	Non-albumin_protein_levels	33	135	5	5.49732e-06	1	Bcl2 Fads2 Nfkb1 Tert Traf3
Nr4a2	21738478	White_blood_cell_types	7	98	3	6.1726e-06	1	Acoxl Cdk6 Itga4
Epas1	29403010_19198610_27863252	Eosinophil_counts	104	116	7	6.54507e-06	1	Brd3 Cd200r1 Gata3 Klf3 Pparg Rasgrp4 Spsb1
Nfe2l2	28193307_29403010_27863252_23314186_25096241	Monocyte_count	92	185	8	6.6264e-06	1	Bcl2 Ccr3 Dock10 Nfkbie Rpn1 Slc2a1 Ssh2 Treml2
Fosl1	27863252	Eosinophil_percentage_of_white_cells	88	259	9	7.01268e-06	1	Exoc2 Ikzf2 Ikzf3 Il4ra Kdm6b Klf3 Lpp Tnfsf8 Trerf1
Zfp281	29403010_22286170_27863252	Lymphocyte_counts	96	238	9	7.27859e-06	1	Acoxl Ikbke Klf12 L3mbtl3 Lta Ppard Ptprc Slc35d1 Tnfrsf1a
Zfp105	21297633_24837172_26192919_28067908_23511034_19122664_19915572_20848476_25082827_23128233_20228798_20228799_19915573_28008999	Ulcerative_colitis	85	146	7	7.79913e-06	1	Gramd1b H2-Aa Hdac9 Hormad2 Map3k8 Notch1 Prdm1
Zfp148	27863252	Sum_eosinophil_basophil_counts	98	301	10	8.34226e-06	1	Bcl2 Chd7 Exoc2 Kdm6b Larp4b Lpp Nfatc2 P4ha2 Spsb1 Stxbp6
Arid3a	23603761	Juvenile_idiopathic_arthritis_(oligoarticular_or_rheumatoid_factor-negative_polyarticular)	17	137	4	8.45505e-06	1	Ccr3 Il2rb Prr5l Zfp36l1
Tbx21	18758464_26192919_28067908_17068223_27569725_23128233_28008999	Inflammatory_bowel_disease	130	135	8	8.49776e-06	1	Ankrd55 Cd28 Cdyl2 Gpr35 Ifngr2 Il18r1 Notch1 Sema6d
Ppard	27846195	Response_to_paliperidone_in_schizophrenia_(PANSS_score)	19	124	4	9.16801e-06	1	Cwh43 Nxn Prlr Psd3
Relb	25574825_18364390_25903422_23143594_18369459_25939698_28537254_20953188_20953189_19169255_19169254_20953190	Psoriasis	40	126	5	1.04317e-05	1	Exoc2 Ikbke Il13 Tsc1 Zfp365
Etv1	18758464_26192919_28067908_17068223_27569725_23128233_28008999	Inflammatory_bowel_disease	130	100	7	1.06923e-05	1	Dnmt3b F5 Fermt1 Fosl2 Nod2 Thada Tnfsf15
Prdm16	25811787	Urate_levels_in_overweight_individuals	12	67	3	1.21165e-05	1	Abcg2 Dlg2 Dysf
Epas1	27863252	Neutrophil_percentage_of_granulocytes	77	116	6	1.32548e-05	1	Brd3 Klf3 Pparg Rasgrp4 Spsb1 Zfp36l2
Ar	25014791_21156761_20453842_21505073_20453841_19503088_17554300_28118524_18794853_24782177_23918589_24449572_21844665_21452313_23028356_23143596_22446963_24390342_17804836	Rheumatoid_arthritis	73	124	6	1.42536e-05	1	Anxa3 Dpp4 Jazf1 Ptpn2 Rasgrp1 Rel
Foxo1	27863252	Eosinophil_percentage_of_white_cells	88	103	6	1.44958e-05	1	Apbb1ip Ikzf3 Kdm6b Nfatc2 Runx1 Zfp365
Cic	23817569	Self-reported_allergy	12	72	3	1.5055e-05	1	Il2ra Lpp Nfatc2
Maf	18758464_26192919_28067908_17068223_27569725_23128233_28008999	Inflammatory_bowel_disease	130	613	16	1.56283e-05	1	Ets1 Fads2 H2-Aa Ifih1 Ifngr2 Il10 Il18r1 Il23r Litaf Lpxn Nod2 Rorc Sema6d Smad3 Stat4 Tnfsf15
Pou2f2	18758464_26192919_28067908_17068223_27569725_23128233_28008999	Inflammatory_bowel_disease	130	194	9	1.66772e-05	1	Bank1 Cd226 Cd28 Crem Fosl2 Galc Hormad2 Map3k8 Ptpn2
Gzf1	29875488_28240269	Blood_protein_levels	620	33	8	1.70044e-05	1	Ccrl2 Cst3 H2-Eb1 Npc2 Pdgfrb Qrich1 Spint1 Treml2
Zfp182	27082954	Peripheral_arterial_disease_(traffic-related_air_pollution_interaction)	61	157	6	1.92704e-05	1	Got1 Impa2 Lrba Nav2 Paqr8 Rilpl2
Nfkb1	27863252	Sum_eosinophil_basophil_counts	98	264	9	1.97198e-05	1	Cd200r1 Cdk6 Ikzf2 Lpp Nfkb1 Ptprc Smad3 Trerf1 Zfpm1
Foxj1	24514567_21079607_23568457_28494655	Anorexia_nervosa	16	182	4	1.99767e-05	1	Mctp1 Ppp3ca Sorcs2 Vgll4
Fosl2	27863252	Eosinophil_percentage_of_granulocytes	82	492	11	2.09872e-05	1	Asb2 Auh Bcl2a1d Chd7 Klf3 Lpp Pten Rad52 Smad3 Zfp365 Zfp652
Pou2af1	29403010_22286170_27863252	Lymphocyte_counts	96	152	7	2.26154e-05	1	Arhgef3 Bcl2 Ets1 Ikbke Klf3 L3mbtl3 Scml4
Rorc	29403010	Total_bilirubin_levels	9	371	4	2.46216e-05	1	Auh Exoc6 Pccb Tmprss6
Ets1	27863252	Eosinophil_percentage_of_white_cells	88	383	10	2.56424e-05	1	Bcl2 Bcl2a1b Bcl3 Chd7 Exoc2 Klf3 Rasgrp4 Zfp365 Zfp652 Zfpm1
Klf2	27863252	Sum_eosinophil_basophil_counts	98	152	7	2.5866e-05	1	Bcl2l11 Glcci1 Kdm6b P4ha2 Pten Spsb1 Zfpm1
Cebpb	28928442	Measles	16	196	4	2.67231e-05	1	4921507P07Rik Dlg2 Nck2 Ypel2
Rel	21297633_24837172_26192919_28067908_23511034_19122664_19915572_20848476_25082827_23128233_20228798_20228799_19915573_28008999	Ulcerative_colitis	85	177	7	2.72411e-05	1	Ergic1 Ets1 Gramd1b Il7r Nfkb1 Smad3 Tom1
Hoxb1	29255261_27089181_23229837_27918536_20634892_25993607_29292387_17667963_18762592_27067015	Neuroticism	103	99	6	2.84235e-05	1	Celf4 Dcc Kcnc2 Mdga2 Sox6 Tmem163
Myt1l	26830138	Alzheimer_disease_and_age_of_onset	62	49	4	2.87025e-05	1	Abca8b Lama1 Trf Trpm1
Zfp791	25631615_21307088_28073927	Optic_disc_area	11	13	2	2.8886e-05	1	F5 Hormad2
Rorc	26974007	Chronic_inflammatory_diseases_(ankylosing_spondylitis,_Crohn's_disease,_psoriasis,_primary_sclerosing_cholangitis,_ulcerative_colitis)_(pleiotropy)	93	371	10	3.17772e-05	1	Ets1 Il1r1 Il23r Jazf1 Nod2 Prdm1 Ptpn2 Rorc Sbno2 Zpbp2
Fosl1	27863252	Eosinophil_percentage_of_granulocytes	82	259	8	3.22956e-05	1	Exoc2 Ikzf2 Ikzf3 Kdm6b Klf3 Lpp Tnfsf8 Trerf1
Nfkb1	18758464_26192919_28067908_17068223_27569725_23128233_28008999	Inflammatory_bowel_disease	130	264	10	3.2378e-05	1	Ccnd3 Ergic1 Fermt1 Il18r1 Il23r Impg2 Lpp Lpxn Ptpn2 Smad3
Atf3	27863252	Sum_eosinophil_basophil_counts	98	285	9	3.59702e-05	1	Apbb1ip Bcl2 Brd3 Exoc2 Glcci1 Ikzf2 P4ha2 Runx1 Trerf1
Prrx1	27021288_26184070	Oppositional_defiant_disorder_dimensions_in_attention-deficit_hyperactivity_disorder	8	152	3	3.66686e-05	1	Adam12 Bmp7 Sox5
Nfkb1	27863252	Eosinophil_percentage_of_granulocytes	82	264	8	3.69966e-05	1	Gkap1 Ikzf2 Lpp Nfkb1 Rad52 Smad3 Trerf1 Zfpm1
Arid5a	28199695	Mosquito_bite_size	60	54	4	3.7121e-05	1	Actn1 Kif3a Runx2 Tnfrsf8
Pou6f1	27863252	Eosinophil_percentage_of_granulocytes	82	132	6	3.95625e-05	1	Apbb1ip Auh Bcl2 Pten Zfp652 Zfpm1
Rxra	26974007	Chronic_inflammatory_diseases_(ankylosing_spondylitis,_Crohn's_disease,_psoriasis,_primary_sclerosing_cholangitis,_ulcerative_colitis)_(pleiotropy)	93	381	10	3.97974e-05	1	Bank1 Cd226 Crem Dnmt3a Ifih1 Jazf1 Notch1 Ptpn2 Ubash3a Zpbp2
Atf3	27863252	Neutrophil_percentage_of_granulocytes	77	285	8	4.02462e-05	1	Apbb1ip Bcl2 Brd3 Exoc2 Gkap1 Ikzf2 Runx1 Trerf1
Tcf4	29403010	Albumin-globulin_ratio	25	135	4	4.03796e-05	1	Bcl2 Fads2 Nfkb1 Traf3
Nfkb1	28158719_27863252_29403010	White_blood_cell_count_(basophil)	42	264	6	4.07324e-05	1	Atp8b4 Cdk6 Fam53b Itga4 Ryr1 Zfpm1
Prdm1	25778476	Alzheimer's_disease_in_APOE_e4+_carriers	7	184	3	4.08311e-05	1	Pde1a Picalm Sord
Dbp	29403010_22286170_27863252	Lymphocyte_counts	96	69	5	4.12983e-05	1	Fam49b Il2ra L3mbtl3 Nfkbia Scml4
Stat1	25884002	Neutrophil_count_in_HIV-infection	5	280	3	4.1648e-05	1	Ifi203 Ifi204 Ifi205
Fosl2	29403010_19198610_27863252	Eosinophil_counts	104	492	12	4.16654e-05	1	Asb2 Auh Bcl2a1d Chd7 Gata3 Il4ra Klf3 Lpp Pten Smad3 Zfp365 Zfp652
Rorc	29403010_22286170_27863252	Lymphocyte_counts	96	371	10	4.18995e-05	1	Acoxl Atp2b4 Ccr7 Ets1 Jazf1 L3mbtl3 Lta Nfkbia Rreb1 Ssh2
Tcf7l2	29255261_27089181_23229837_27918536_20634892_25993607_29292387_17667963_18762592_27067015	Neuroticism	103	156	7	4.21545e-05	1	Arpp21 Celf4 Nsf Plekha2 Sbf2 Vrk2 Wdr1
Nfe2	27863252	Immature_fraction_of_reticulocytes	73	304	8	4.30566e-05	1	Angpt1 Arid3a Bsn Cd226 Itga4 Smox Specc1 Tesk2
Tcf4	27863252	Eosinophil_percentage_of_granulocytes	82	135	6	4.48793e-05	1	Bcl2 Klf3 Nfkb1 Rad52 Spsb1 Zfp365
Rel	28193307_29403010_27863252_23314186_25096241	Monocyte_count	92	177	7	4.55186e-05	1	Dusp14 Ets1 Fam46c Nfkbie Pnkd Rpn1 Ssh2
Maf	21297633_24837172_26192919_28067908_23511034_19122664_19915572_20848476_25082827_23128233_20228798_20228799_19915573_28008999	Ulcerative_colitis	85	613	12	4.59899e-05	1	Cacna2d1 Ets1 Gramd1b H2-Aa Il10 Il23r Litaf Rorc Sema6d Smad3 Stat4 Tnfsf15
Foxf2	29875488_28240269	Blood_protein_levels	620	253	23	4.67503e-05	1	Arrb2 B3gnt8 Bsn C1rl Cd109 Clic5 Cst3 Igf2r Il23r Kdelc2 Lama5 Lpp Ly9 Nqo2 Nucb2 Plxnc1 Procr Ptgfrn Ret Sorcs2 St3gal1 Tapbpl Tgfbi
Nfkb1	21297633_24837172_26192919_28067908_23511034_19122664_19915572_20848476_25082827_23128233_20228798_20228799_19915573_28008999	Ulcerative_colitis	85	264	8	4.8016e-05	1	Ergic1 Gramd1b Il23r Il7r Nfkb1 Ptpn2 Ptprc Smad3
Bcl6b	24665060	Smoking_initiation	13	99	3	5.07152e-05	1	Acot12 Cdyl2 Sbf2
Zfp831	21546767	Dialysis-related_mortality	7	28	2	5.3385e-05	1	Pdzrn3 Tet3
Stat3	26974007	Chronic_inflammatory_diseases_(ankylosing_spondylitis,_Crohn's_disease,_psoriasis,_primary_sclerosing_cholangitis,_ulcerative_colitis)_(pleiotropy)	93	479	11	5.41857e-05	1	Cd226 Dnmt3a Il10 Il1r1 Il23r Ptpn2 Rorc Sbno2 Skap2 Smad3 Ubash3a
Fli1	27863252	Eosinophil_percentage_of_granulocytes	82	141	6	5.72297e-05	1	Ankrd33b Kdm6b Klf3 Tnfsf8 Trerf1 Zfp365
Maf	27723758	Selective_IgA_deficiency	13	613	5	5.7351e-05	1	Cd86 Cdh23 Gata3 Ifih1 Ikzf3
Nfkb2	21297633_24837172_26192919_28067908_23511034_19122664_19915572_20848476_25082827_23128233_20228798_20228799_19915573_28008999	Ulcerative_colitis	85	199	7	5.74555e-05	1	Ergic1 Ets1 H2-Aa Nfkb1 Prdm1 Rorc Tnfsf15
Zfp148	27863252	Neutrophil_percentage_of_granulocytes	77	301	8	5.91502e-05	1	Bcl2 Bcl2a1d Chd7 Exoc2 Larp4b Lpp Spsb1 Zfp652
Zfp263	28193307_29403010_27863252_23314186_25096241	Monocyte_count	92	251	8	5.94911e-05	1	Ankrd55 Bcl2 Ehd4 Ets1 Fam46c Slc2a1 Tbc1d14 Tnfrsf1a
Rel	29403010_22286170_27863252	Lymphocyte_counts	96	177	7	5.98328e-05	1	Atp2b4 Ets1 Fam49b Icam1 Il2ra Lta Ssh2
Cic	29083406	Allergic_disease_(asthma,_hay_fever_or_eczema)	51	72	4	6.07575e-05	1	Il2ra Il7r Lpp Nfatc2
Klf2	27863252	Neutrophil_percentage_of_granulocytes	77	152	6	6.09725e-05	1	Bcl2l11 Pten Spsb1 Tnfsf8 Zfp36l2 Zfpm1
Nfkb1	27863252	Eosinophil_percentage_of_white_cells	88	264	8	6.16448e-05	1	Bcl3 Gkap1 Ikzf2 Lpp Nfkb1 Smad3 Trerf1 Zfpm1
Elf1	21383967	Celiac_disease_or_Rheumatoid_arthritis	13	306	4	6.18448e-05	1	Ifi203 Ifi204 Ptpn2 Stat4
Ascl2	23512250_29348612_23007406_19684603_19684604_22076464_25310577	Acute_lymphoblastic_leukemia_(childhood)	23	165	4	6.26867e-05	1	Lhpp Pard3 Ptprj Slco3a1
Mesp2	29559693	Osteoarthritis_(self-reported)	11	19	2	6.31946e-05	1	Lct Tgfa
Atf3	27863252	Eosinophil_percentage_of_granulocytes	82	285	8	6.34746e-05	1	Apbb1ip Bcl2 Brd3 Exoc2 Gkap1 Ikzf2 Runx1 Trerf1
Zfp369	25884002	Neutrophil_count_in_HIV-infection	5	45	2	6.65825e-05	1	Ifi203 Mndal
Maf	27386562_18941528_20453840_18997785_21654844_21244703_24076602_28445677_21833088_23412934_19010793_20598377_17660530_19525955_22457343_19525953_22190364	Multiple_sclerosis	102	613	13	6.70159e-05	1	Cd86 Chst12 Cxcr5 Ddah1 Ets1 Ifngr2 Ildr1 Jazf1 Malt1 Prr5l Stat4 Tef Traf3
Tead1	18758464_26192919_28067908_17068223_27569725_23128233_28008999	Inflammatory_bowel_disease	130	288	10	6.73365e-05	1	Ets1 Fads2 Fermt1 Fosl2 Gpr65 Il23r Il2ra Ipmk Sema6d Thada
Irf4	27863252	High_light_scatter_reticulocyte_percentage_of_red_cells	99	822	15	6.88414e-05	1	Angpt1 Atxn1 Bcl2l11 Bmp7 Fam46c Hbs1l Riok3 S1pr2 Sema4d Sept9 Specc1 Tesk2 Thrb Tmcc2 Tns1
Nr2f1	18758464_26192919_28067908_17068223_27569725_23128233_28008999	Inflammatory_bowel_disease	130	92	6	6.95225e-05	1	Cd28 Cdyl2 Litaf Lpxn Notch1 Thada
Terf1	23006423	Response_to_taxane_treatment_(docetaxel)	5	46	2	6.96007e-05	1	Slc6a6 Zbtb7c
Maf	29083406	Allergic_disease_(asthma,_hay_fever_or_eczema)	51	613	9	6.96733e-05	1	Foxo1 Il13 Itpr3 Jazf1 Rora Rorc Smad3 Stat5b Zfp652
Junb	29403010_19198610_27863252	Eosinophil_counts	104	115	6	6.9744e-05	1	Apbb1ip Foxo1 Ikzf3 Klf3 Spsb1 Trerf1
Smad3	27386562_18941528_20453840_18997785_21654844_21244703_24076602_28445677_21833088_23412934_19010793_20598377_17660530_19525955_22457343_19525953_22190364	Multiple_sclerosis	102	300	9	7.33583e-05	1	Alpk2 Ankrd55 Cdh3 Chst12 Cxcr5 Plekhg5 Slamf7 Stat4 Zbtb46
Meis1	27863252	Neutrophil_percentage_of_granulocytes	77	97	5	7.36487e-05	1	Larp4b Lpp Pten Tnfsf8 Zc3h7b
Six5	27863252	Eosinophil_percentage_of_white_cells	88	271	8	7.40375e-05	1	Apbb1ip Bcl2a1b Brd3 Dock3 Exoc2 Ikzf3 Il4ra Kdm6b
Myb	27650483_26631737	Urinary_albumin-to-creatinine_ratio	11	135	3	7.4487e-05	1	Arhgap33 Casz1 Celf2
Bach1	19656524_28054174_22419666_22863734_20023658	Orofacial_clefts	22	181	4	7.47843e-05	1	Acot12 Pak1 Sema4d Zic2
Runx2	27863252	Eosinophil_percentage_of_white_cells	88	201	7	7.64277e-05	1	Bcl2a1b Bcl2a1d Klf12 Klf3 Nfatc2 Runx1 Trerf1
Ahctf1	26974007	Chronic_inflammatory_diseases_(ankylosing_spondylitis,_Crohn's_disease,_psoriasis,_primary_sclerosing_cholangitis,_ulcerative_colitis)_(pleiotropy)	93	81	5	7.67822e-05	1	Antxr2 Crem Erap1 Notch1 Skap2
Rora	18758464_26192919_28067908_17068223_27569725_23128233_28008999	Inflammatory_bowel_disease	130	136	7	7.78708e-05	1	Ets1 Galc Gpr65 Il18r1 Impg2 Smad3 Sox5
Batf	29403010_22286170_27863252	Lymphocyte_counts	96	759	14	7.82223e-05	1	Ccr7 Dnmt3a Dnmt3b Fam49b Hormad2 Ikbke Irf4 Klf3 Ly9 Ppard Rilpl2 Rreb1 S1pr1 Sphk1
Zfp532	22922875_27064256	Glaucoma_(primary_angle_closure)	7	34	2	7.9138e-05	1	Epdr1 Fermt2
Relb	25574825_23886662_26482879_23042114_21666691_22197932_25865352	Atopic_dermatitis	12	126	3	8.04395e-05	1	Il13 Il1r1 Zfp365
Zfp263	29403010_22286170_27863252	Lymphocyte_counts	96	251	8	8.06139e-05	1	Atp2b4 Bcl2 Ets1 Ikbke L3mbtl3 Nlrc5 Ptprc Tnfrsf1a
Zfp219	18758464_26192919_28067908_17068223_27569725_23128233_28008999	Inflammatory_bowel_disease	130	185	8	8.17526e-05	1	Ankrd55 Bsn Cd28 Galc Gpr65 Lpxn Stat4 Zfp831
Zfp382	27089181	Positive_affect	12	20	2	8.41714e-05	1	Sema6d Stk4
Fli1	27863252	Eosinophil_percentage_of_white_cells	88	141	6	8.50824e-05	1	Ankrd33b Kdm6b Klf3 Tnfsf8 Trerf1 Zfp365
Ets1	27863252	Eosinophil_percentage_of_granulocytes	82	383	9	8.55528e-05	1	Bcl2 Bcl2a1b Chd7 Exoc2 Klf3 Spsb1 Zfp365 Zfp652 Zfpm1
Tbx21	28193307_29403010_27863252_23314186_25096241	Monocyte_count	92	135	6	8.57237e-05	1	Ankrd55 Bcl2l11 Fam46c Gpr35 Pnkd Slc2a1
Cebpb	28193307_29403010_27863252_23314186_25096241	Monocyte_count	92	196	7	8.66294e-05	1	Bcl2 Cnn2 Fam46c Itga4 Slc9a3r1 Ssbp4 Thrb
Klf2	27863252	Eosinophil_percentage_of_granulocytes	82	152	6	8.68463e-05	1	Bcl2l11 Kdm6b Pten Spsb1 Tnfsf8 Zfpm1
Fosb	27863252	Granulocyte_percentage_of_myeloid_white_cells	90	86	5	8.7422e-05	1	Ank1 Bcl2a1d Bcl2l11 Glcci1 Plaur
Zfp148	29403010_19198610_27863252	Eosinophil_counts	104	301	9	8.75614e-05	1	Bcl2 Bcl2a1d Chd7 Exoc2 Kdm6b Lpp Spsb1 Stxbp6 Zfp652
Tbx21	26974007	Chronic_inflammatory_diseases_(ankylosing_spondylitis,_Crohn's_disease,_psoriasis,_primary_sclerosing_cholangitis,_ulcerative_colitis)_(pleiotropy)	93	135	6	9.10512e-05	1	Ankrd55 Ern1 Gpr35 Ifngr2 Il18r1 Notch1
Fosl2	29083406	Allergic_disease_(asthma,_hay_fever_or_eczema)	51	492	8	9.13313e-05	1	Itgb8 Itpr3 Lpp Rora Smad3 Tnfrsf11a Zfp365 Zfp652
Cebpb	26974007	Chronic_inflammatory_diseases_(ankylosing_spondylitis,_Crohn's_disease,_psoriasis,_primary_sclerosing_cholangitis,_ulcerative_colitis)_(pleiotropy)	93	196	7	9.27885e-05	1	Antxr2 Cd226 Crem Erap1 Ifih1 Smad3 Zpbp2
Zfp148	27863252	Eosinophil_percentage_of_granulocytes	82	301	8	9.2909e-05	1	Bcl2 Bcl2a1d Chd7 Exoc2 Kdm6b Lpp Spsb1 Zfp652
Mafb	28199695	Itch_intensity_from_mosquito_bite_adjusted_by_bite_size	73	108	5	9.50799e-05	1	Chn2 Cntnap2 Dlg2 Sulf1 Wnt3
Ar	27386562_18941528_20453840_18997785_21654844_21244703_24076602_28445677_21833088_23412934_19010793_20598377_17660530_19525955_22457343_19525953_22190364	Multiple_sclerosis	102	124	6	9.51239e-05	1	Il7r Jazf1 Ncoa2 Rasgrp1 Slamf7 Trim2
Nr1d1	21297633_24837172_26192919_28067908_23511034_19122664_19915572_20848476_25082827_23128233_20228798_20228799_19915573_28008999	Ulcerative_colitis	85	93	5	9.66428e-05	1	Cd226 Cd28 Gpr65 Il23r Procr
Dzip1	29186694	Cognitive_ability_(MTAG)	36	43	3	9.80723e-05	1	Bsn Dcc Ivd
Nr4a2	18758464_26192919_28067908_17068223_27569725_23128233_28008999	Inflammatory_bowel_disease	130	98	6	9.89085e-05	1	Crem Fosl2 Gpr65 Ifih1 Map3k8 Stat4
Sp140	22961000	Primary_biliary_cirrhosis	13	20	2	9.94059e-05	1	Irf5 Stat4
Batf	25574825_23886662_26482879_23042114_21666691_22197932_25865352	Atopic_dermatitis	12	759	5	0.000100871	1	Il13 Kif3a Ovol1 Prr5l Zfp365
Stat4	28158719_27863252_29403010_21738480_21738479_20139978_22037903_25096241	White_blood_cell_count	94	265	8	0.000101262	1	Aim2 Atxn1 Cdk6 Chd7 Klf3 Lta Nlrp3 Sbno2
Atf3	27863252	Eosinophil_percentage_of_white_cells	88	285	8	0.000105086	1	Apbb1ip Bcl2 Brd3 Exoc2 Gkap1 Ikzf2 Runx1 Trerf1
Prdm1	27863252	Platelet_distribution_width	101	184	7	0.000105424	1	Abcd3 Cd226 Dnm3 Ehd3 Fam46c Snx9 Txk
Satb1	27863252	Sum_eosinophil_basophil_counts	98	256	8	0.000106984	1	Apbb1ip Bcl2 Bcl2l11 Glcci1 P4ha2 Ptprc Smad3 Zc3h7b
Klf12	28441456	Facial_morphology_(factor_15,_philtrum_width)	12	139	3	0.000107686	1	Dmd Napb Nxn
Irf1	25014791_21156761_20453842_21505073_20453841_19503088_17554300_28118524_18794853_24782177_23918589_24449572_21844665_21452313_23028356_23143596_22446963_24390342_17804836	Rheumatoid_arthritis	73	178	6	0.000108162	1	Acoxl Aff3 D1Ertd622e Dpp4 Nfkbie Ptpn2
Nfat5	27386562_18941528_20453840_18997785_21654844_21244703_24076602_28445677_21833088_23412934_19010793_20598377_17660530_19525955_22457343_19525953_22190364	Multiple_sclerosis	102	127	6	0.000108556	1	Cxcr5 Ncoa2 Rgs14 Trim2 Vav2 Zfp36l1
Skil	24939585_27764096	Age-related_hearing_impairment	12	23	2	0.000111951	1	Acvr1b Zfp536
Foxf2	28199695	Itch_intensity_from_mosquito_bite	33	253	5	0.00011211	1	Ets1 Ivd Lpp Mctp2 Runx2
Maf	26974007	Chronic_inflammatory_diseases_(ankylosing_spondylitis,_Crohn's_disease,_psoriasis,_primary_sclerosing_cholangitis,_ulcerative_colitis)_(pleiotropy)	93	613	12	0.000112422	1	Erap1 Ets1 Fndc3a Ifih1 Ifngr2 Il10 Il18r1 Il23r Jazf1 Nod2 Rorc Smad3
Rbpj	25014791_21156761_20453842_21505073_20453841_19503088_17554300_28118524_18794853_24782177_23918589_24449572_21844665_21452313_23028356_23143596_22446963_24390342_17804836	Rheumatoid_arthritis	73	112	5	0.000112936	1	Acoxl Arhgef3 Il2rb Rpp14 Tec
Irf4	28193307_29403010_27863252_23314186_25096241	Monocyte_count	92	822	14	0.000113605	1	Acoxl Acvrl1 Bcl2 Bcl2l11 Ccr2 Ccr3 Csf1 Dock10 Fam46c Gpr35 Lsp1 Ssh2 Stxbp6 Thrb
Tigd2	25352340	Iron_status_biomarkers_(transferrin_levels)	5	59	2	0.000114886	1	Fads2 Tmprss6
Sp4	27863252	Sum_eosinophil_basophil_counts	98	582	12	0.000115033	1	Bcl2 Brd3 Cdk6 Chd7 Dock3 Glcci1 Larp4b Lpp Nfkb1 Rasgrp4 Tbx6 Zc3h7b
Lin28b	26853712	Craniofacial_microsomia	7	41	2	0.000115517	1	Agap1 Pard3b
Fli1	26974007	Chronic_inflammatory_diseases_(ankylosing_spondylitis,_Crohn's_disease,_psoriasis,_primary_sclerosing_cholangitis,_ulcerative_colitis)_(pleiotropy)	93	141	6	0.000115732	1	Dnmt3a Sbno2 Slc9a8 Tnfrsf1a Ubash3a Zfp365
Fosl1	27863252	Sum_eosinophil_basophil_counts	98	259	8	0.000115958	1	Cdk6 Exoc2 Ikzf2 Il4ra Kdm6b Klf3 Lpp Trerf1
Zfp219	23143596	Rheumatoid_arthritis_(ACPA-positive)	24	185	4	0.000116277	1	Ankrd55 Irf5 Rasgrp1 Stat4
Sox5	23000144_26394269_21399635_28062665_19458352_20639880_28425483	Primary_biliary_cholangitis	32	137	4	0.000116441	1	Il12rb2 Il7r Stat4 Tnfrsf1a
Six1	18758464_26192919_28067908_17068223_27569725_23128233_28008999	Inflammatory_bowel_disease	130	145	7	0.000116445	1	Fermt1 Fosl2 Galc Gpr65 Ifngr2 Map3k8 Stat4
Stat4	29403010_22286170_27863252	Lymphocyte_counts	96	265	8	0.000117478	1	Bcl2 Fam49b Icam1 Il2ra Klf3 Lta Nlrc5 Rilpl2
Nfkb1	21738478	White_blood_cell_types	7	264	3	0.00011951	1	Acoxl Cdk6 Itga4
Zfp524	27863252	High_light_scatter_reticulocyte_count	112	74	5	0.000120496	1	Atxn1 Ccnd3 H2-Q10 Tmcc2 Tns1
Hhex	28928442	Yeast_infection	20	84	3	0.000120595	1	BC049715 Gpr161 Tln2
Foxj1	27863252	Immature_fraction_of_reticulocytes	73	182	6	0.000122185	1	Bsn Bzw2 Hk1 S1pr2 Specc1 Thada
Nfkb2	29403010_22286170_27863252	Lymphocyte_counts	96	199	7	0.000124674	1	Antxr2 Atp2b4 Ets1 Icam1 Il2ra Nfkbia S1pr1
Twist1	27694959	Gut_microbiota_(functional_units)	20	85	3	0.000124915	1	Pltp Slc9a9 Slit3
Nr1d2	26974007	Chronic_inflammatory_diseases_(ankylosing_spondylitis,_Crohn's_disease,_psoriasis,_primary_sclerosing_cholangitis,_ulcerative_colitis)_(pleiotropy)	93	48	4	0.000129847	1	Il18r1 Il1r1 Il23r Nfkb1
Nfic	27863252	Monocyte_percentage_of_white_cells	93	48	4	0.000129847	1	Ccnd3 Cdk6 Sh2d3c Tnfsf10
Fli1	17558408_20190752_18311140_22057235_24999842_23936387	Celiac_disease	32	141	4	0.000130133	1	Ccr3 Mttp Ubash3a Zfp36l1
Foxo1	27863252	Eosinophil_percentage_of_granulocytes	82	103	5	0.000132144	1	Apbb1ip Ikzf3 Kdm6b Runx1 Zfp365
Sox5	22961000	Primary_biliary_cirrhosis	13	137	3	0.000133317	1	Il12rb2 Stat4 Tnfrsf1a
Zfp219	25014791_21156761_20453842_21505073_20453841_19503088_17554300_28118524_18794853_24782177_23918589_24449572_21844665_21452313_23028356_23143596_22446963_24390342_17804836	Rheumatoid_arthritis	73	185	6	0.00013362	1	Ankrd55 Irf5 Nfkbie Prkch Rasgrp1 Stat4
Runx2	29146897_18849991_22693459_27182965	Male-pattern_baldness	23	201	4	0.000134598	1	Cenpw Ebf1 Fam53b Thada
Sox15	26879886	Low_high_density_lipoprotein_cholesterol_levels	5	64	2	0.000135286	1	Abca1 Plcl1
Stat4	27863252	Sum_eosinophil_basophil_counts	98	265	8	0.000135782	1	Bcl2 Cdk6 Chd7 Klf3 Larp4b Nfatc2 Runx1 Smad3
Msx2	20485516_29760442_23493294_20719862_28171582	Central_corneal_thickness	28	62	3	0.000136971	1	Adamts6 Fbn1 Lpar1
Stat1	27863252	Monocyte_percentage_of_white_cells	93	280	8	0.000137324	1	Ccnd3 Eif4e3 Lpp Lsp1 Nfkb1 S1pr3 Tbc1d14 Tnfsf10
Prdm16	23259602_21940522_23064961	Dental_caries	26	67	3	0.000137712	1	Abcg2 Rps6ka2 Sidt1
Fli1	29403010_22286170_27863252	Lymphocyte_counts	96	141	6	0.000137956	1	Dnmt3a Fam49b Klf3 Ssh2 Tnfrsf1a Zfp36l2
Glis3	24322204	Bipolar_disorder_(body_mass_index_interaction)	16	112	3	0.000141451	1	Adam19 Cdh23 Rin2
Jund	29071344	Major_depression_and_alcohol_dependence	14	131	3	0.000147757	1	Igsf9b Ncald Nrp1
Pou6f1	29403010_19198610_27863252	Eosinophil_counts	104	132	6	0.00014941	1	Apbb1ip Auh Bcl2 Pten Zfp652 Zfpm1
Cenpt	27863252	Neutrophil_percentage_of_granulocytes	77	60	4	0.00014963	1	Cog6 Plaur Rad52 Zfp652
Rxra	18758464_26192919_28067908_17068223_27569725_23128233_28008999	Inflammatory_bowel_disease	130	381	11	0.000150258	1	Bank1 Cd226 Crem F5 Fosl2 Galc Gpr65 Ifih1 Lpxn Notch1 Ptpn2
Stat3	29403010_19198610_27863252	Eosinophil_counts	104	479	11	0.000150713	1	Asb2 Chd7 Cog6 Foxo1 Il4ra Klf3 Lpp Pten Runx1 Smad3 Spsb1
Nkx3-1	29494758_23273568_18204447_26502338_24871463_23053960_25862617_21044949_21408207_18204098_20169177_29848360_18204446_19165918_28714469_26606652_22291604_26663301_26316170_19838193_19838195_27399966	Systemic_lupus_erythematosus	147	228	9	0.000152356	1	5430427O19Rik Atxn1 Ikzf3 Lbh Mgat5 Plcl1 Sez6l2 Tnfsf4 Traf3
Cggbp1	29494758_23273568_18204447_26502338_24871463_23053960_25862617_21044949_21408207_18204098_20169177_29848360_18204446_19165918_28714469_26606652_22291604_26663301_26316170_19838193_19838195_27399966	Systemic_lupus_erythematosus	147	32	4	0.000152811	1	Arid3a Cdkn1b Itgam Notch2
Arntl2	27846195	Response_to_paliperidone_in_schizophrenia_(positive_Marder_score)	16	115	3	0.000152972	1	B9d1 Cacna1s Slc5a10
Zfp148	27863252	Eosinophil_percentage_of_white_cells	88	301	8	0.000153066	1	Bcl2 Bcl2a1d Chd7 Exoc2 Kdm6b Lpp Nfatc2 Zfp652
Sall3	25673412	Hip_circumference_adjusted_for_BMI	53	34	3	0.000154468	1	Bmp6 Cdk6 Plag1
Meis1	27863252	Granulocyte_percentage_of_myeloid_white_cells	90	97	5	0.000154638	1	Ccnd3 Eif4e3 Lpp Lsp1 Tbc1d14
Tcf4	22700719_28165464_18758461_21131588_23770605_24292274_26956414	Chronic_lymphocytic_leukemia	35	135	4	0.000157278	1	Bcl2 Fas Gramd1b Tert
Fosl1	27863252	Neutrophil_percentage_of_granulocytes	77	259	7	0.000158508	1	Exoc2 Ikzf2 Ikzf3 Klf3 Lpp Tnfsf8 Trerf1
Pou2f2	25130324	Heschl's_gyrus_morphology	10	194	3	0.00015988	1	Cd28 Prkca Tnfaip8
Isl2	29403010_22286170_27863252	Lymphocyte_counts	96	92	5	0.000163348	1	Antxr2 Dnmt3a Hormad2 Klf12 Zfp36l2
Rorc	28193307_29403010_27863252_23314186_25096241	Monocyte_count	92	371	9	0.000164604	1	Acoxl Acvrl1 Bcl2l11 Ccr2 Ets1 Fam46c Foxo1 Rreb1 Ssh2
Junb	27863252	Neutrophil_percentage_of_granulocytes	77	115	5	0.000164755	1	Apbb1ip Ikzf3 Klf3 Spsb1 Trerf1
Stat3	27863252	Eosinophil_percentage_of_white_cells	88	479	10	0.000164991	1	Asb2 Bcl3 Chd7 Cog6 Il4ra Klf3 Lpp Pten Runx1 Smad3
Hmx3	27639821	Mortality_in_sepsis	5	71	2	0.000166623	1	Crispld2 Lpp
Zfp606	20173748_25584925_22080838_29394082_19300482_25241909_28166215_25101718	Chronic_obstructive_pulmonary_disease	24	14	2	0.000168036	1	Dsp Tm9sf4
Stat4	27863252	Lymphocyte_percentage_of_white_cells	76	265	7	0.00016807	1	Cdk6 Chd7 Gimap7 Il2ra Lta Nlrc5 Rbpms
Cic	22922229	Autoimmune_thyroid_diseases_(Graves_disease_or_Hashimoto's_thyroiditis)	5	72	2	0.000171364	1	Il2ra Lpp
Cic	27639821	Mortality_in_sepsis	5	72	2	0.000171364	1	Crispld2 Lpp
Nfkb2	29403010	Potassium_levels	10	199	3	0.000172366	1	Eml6 Lsp1 Pparg
Sp140	24097067_27503288_24097066_28076899	Sj√∂gren's_syndrome	17	20	2	0.00017284	1	Irf5 Stat4
Gli3	24001895_22763476_24903457_23972371_21572416_21909110_19114657_17903302_24954895	Blood_pressure	37	131	4	0.000174602	1	Fes Npr3 Slc39a8 Zfp831
Hbp1	26674333	White_matter_hyperintensities_in_ischemic_stroke	5	73	2	0.000176171	1	Pcdh7 Qrich2
Nfkb1	27863252	Neutrophil_percentage_of_granulocytes	77	264	7	0.000178293	1	Gkap1 Ikzf2 Lpp Nfkb1 Rad52 Trerf1 Zfpm1
Rxra	29198719	Lobe_attachment_(rater-scored_or_self-reported)	54	381	7	0.000178802	1	Ddah1 Epha3 Hmcn1 Lrba Nbea Nrp1 Prex2
Ascl2	28441456	Facial_morphology_(factor_15,_philtrum_width)	12	165	3	0.000178902	1	Dmd Lonp2 Nxn
Atmin	21297633_24837172_26192919_28067908_23511034_19122664_19915572_20848476_25082827_23128233_20228798_20228799_19915573_28008999	Ulcerative_colitis	85	57	4	0.000179637	1	Cyth1 Gramd1b H2-Aa Litaf
Nr4a2	28193307_29403010_27863252_23314186_25096241	Monocyte_count	92	98	5	0.000179969	1	Acoxl Cdk6 Fam46c Itga4 Ssbp4
Nr4a2	22139419_27863252_19221038_22423221_19110211_24026423_19820697	Mean_platelet_volume	145	98	6	0.000180041	1	Asap1 Ehd3 Fam46c Serpine2 Tmcc2 Trim12c
Meis1	27863252	Monocyte_percentage_of_white_cells	93	97	5	0.000180447	1	Ccnd3 Eif4e3 Lpp Lsp1 Tbc1d14
Etv2	25884002	Neutrophil_count_in_HIV-infection	5	74	2	0.000181043	1	Ifi203 Ifi205
Zfp641	23897914	Bronchopulmonary_dysplasia	13	27	2	0.000183092	1	Grhl2 Klf12
Nr3c1	28928442	Bacterial_meningitis	13	153	3	0.000184828	1	Col23a1 Inpp4b Nfat5
Foxp3	18758464_26192919_28067908_17068223_27569725_23128233_28008999	Inflammatory_bowel_disease	130	110	6	0.000186947	1	Crem Il10 Map3k8 Ptpn2 Sox5 Stat4
Rreb1	27863252	Eosinophil_percentage_of_white_cells	88	163	6	0.000188427	1	Bcl2l11 Ikzf3 Kdm6b Klf3 Nfatc2 Rasgrp4
Hsf2	27989323	Fibroblast_growth_factor_basic_levels	6	62	2	0.000189949	1	Gpsm2 Serpine2
Nfatc4	25574825	Inflammatory_skin_disease	36	138	4	0.000191362	1	Adam19 Pde4a Prr5l Rap1gap2
Usf2	28928442_27182965	Childhood_ear_infection	34	57	3	0.000191897	1	Chm Ift81 Rapgef5
Bhlha15	27770636	Late-onset_Alzheimer's_disease	38	51	3	0.000192492	1	Jph3 Rassf8 Selp
Foxp3	21750679_21779181_28314753_20383147_24387989_29293537	Systemic_sclerosis	18	110	3	0.000193581	1	Ikzf2 Sox5 Stat4
Erg	27386562_18941528_20453840_18997785_21654844_21244703_24076602_28445677_21833088_23412934_19010793_20598377_17660530_19525955_22457343_19525953_22190364	Multiple_sclerosis	102	268	8	0.00019379	1	Ankrd55 Batf Cd86 Ets1 Galc L3mbtl3 Rasgrp1 Rgs14
Irf4	22700719_28165464_18758461_21131588_23770605_24292274_26956414	Chronic_lymphocytic_leukemia	35	822	8	0.000195599	1	Acoxl Arsb Bank1 Bcl2 Bcl2l11 Fas Irf4 Qpct
Rara	18758464_26192919_28067908_17068223_27569725_23128233_28008999	Inflammatory_bowel_disease	130	111	6	0.000196419	1	Ets1 Ifih1 Ipmk Map3k8 Rorc Tm9sf4
Dmrta2	21383967	Celiac_disease_or_Rheumatoid_arthritis	13	28	2	0.000197092	1	Ifi204 Stat4
Rara	28334935_25352340	Iron_status_biomarkers_(transferrin_saturation)	18	111	3	0.000198828	1	Prss16 Sept9 Tmprss6
Rara	23563607_25673412_23966867_20935629	Waist-hip_ratio	18	111	3	0.000198828	1	Smad6 Tnfaip8 Trim66
Rel	27863252	Eosinophil_percentage_of_granulocytes	82	177	6	0.000199865	1	Bcl2a1b Bcl2a1d Cxcl1 Nfkb1 Rad52 Smad3
Nfkb1	29403010_19198610_27863252	Eosinophil_counts	104	264	8	0.000200107	1	Cd200r1 Cdk6 Ikzf2 Lpp Nfkb1 Smad3 Trerf1 Zfpm1
Erg	18758464_26192919_28067908_17068223_27569725_23128233_28008999	Inflammatory_bowel_disease	130	268	9	0.000201689	1	Ankrd55 Bank1 Bsn Cd28 Cdyl2 Ets1 Galc Litaf Rgs14
Zfp39	28540026	Autism_spectrum_disorder_or_schizophrenia	64	6	2	0.000202442	1	Gigyf2 Trim26
Sp4	29403010_19198610_27863252	Eosinophil_counts	104	582	12	0.000203726	1	Bcl2 Brd3 Cdk6 Chd7 Dock3 Foxo1 Ikzf3 Lpp Nfkb1 Rasgrp4 Rcl1 Tbx6
Patz1	29403010_27863252_22139419_25705162_23263863_26805783_21507922_20139978_24026423_29066854	Platelet_count	183	51	5	0.000203855	1	Bcl2 Iqgap2 Pnpla3 Pxn Thada
Fosl2	27863252	Eosinophil_percentage_of_white_cells	88	492	10	0.000204824	1	Asb2 Bcl2a1d Chd7 Il4ra Klf3 Lpp Pten Smad3 Zfp365 Zfp652
Tigd2	21297633_24837172_26192919_28067908_23511034_19122664_19915572_20848476_25082827_23128233_20228798_20228799_19915573_28008999	Ulcerative_colitis	85	59	4	0.000205428	1	Ergic1 Gramd1b Il7r Prdm1
Osr2	27989323	Hepatocyte_growth_factor_levels	14	147	3	0.000207703	1	Atxn1 Hao1 Serpine2
Zfp105	28540026	Autism_spectrum_disorder_or_schizophrenia	64	146	5	0.000209597	1	Gigyf2 Gramd1b H2-Aa Mmp16 Vrk2
Isl2	22138694_21743469_20062062_23749187	Ankylosing_spondylitis	22	92	3	0.000211791	1	Antxr2 Csf2rb Csf2rb2
Tcf12	29403010_22286170_27863252	Lymphocyte_counts	96	217	7	0.000212628	1	Antxr2 Arhgef3 Dnmt3a Ikbke L3mbtl3 Nlrc5 Ssh2
Zfp111	26634245	Post_bronchodilator_FEV1/FVC_ratio	171	55	5	0.000213096	1	Cd74 Pparg Ppp4r4 Sema6d Zfp334
Foxp3	21297633_24837172_26192919_28067908_23511034_19122664_19915572_20848476_25082827_23128233_20228798_20228799_19915573_28008999	Ulcerative_colitis	85	110	5	0.00021314	1	Cacna2d1 Il10 Map3k8 Ptpn2 Stat4
Runx1	22424883	Pulmonary_function_decline	12	176	3	0.00021643	1	Agl Slc24a3 Svep1
Irf9	25884002	Neutrophil_count_in_HIV-infection	5	81	2	0.000216994	1	Ifi203 Ifi204
Klf11	27694959	Gut_microbiota_(functional_units)	20	19	2	0.000217018	1	Slc9a9 Sorcs2
Zfp281	27863252	Eosinophil_percentage_of_white_cells	88	238	7	0.00021779	1	Bcl2l11 Klf12 Nfatc2 Pten Runx1 Tnfsf8 Trerf1
Zfp219	22293688_18587394_17554261_28067908_26891255_23850713_22412388_17554300_26192919_20570966_17684544_23266558_17435756_22936669_23128233_17804789_21102463_17447842_28008999	Crohn's_disease	113	185	7	0.000219788	1	Ankrd55 Bsn Gpr65 Jak2 Rasgrp1 Stat4 Zfp831
Junb	27863252	Eosinophil_percentage_of_granulocytes	82	115	5	0.000221574	1	Apbb1ip Ikzf3 Klf3 Spsb1 Trerf1
Prdm16	27899376	Renal_underexcretion_gout	6	67	2	0.00022192	1	Abcg2 Nipal1
Fosl2	21829377_26584805	Plasma_omega-3_polyunsaturated_fatty_acid_levels_(docosahexaenoic_acid)	5	492	3	0.000222778	1	Elovl2 Sox5 Vav3
Foxo1	28193307_29403010_27863252_23314186_25096241	Monocyte_count	92	103	5	0.000227177	1	Ankrd55 Ccr2 Ssh2 Tbc1d14 Thrb
Tcf3	28193307_29403010_27863252_23314186_25096241	Monocyte_count	92	104	5	0.000237652	1	Ccr2 Fam46c Itga4 Slc9a3r1 Ssbp4
Zfp369	24347629_26962152	Periodontal_disease-related_phenotypes	9	45	2	0.000238104	1	Ifi203 Mndal
Six5	29403010_19198610_27863252	Eosinophil_counts	104	271	8	0.000238972	1	Apbb1ip Bcl2a1b Brd3 Dock3 Exoc2 Ikzf3 Il4ra Kdm6b
Zbtb7b	23446634_23935956_23222517_23696099_20927387	Red_blood_cell_traits	25	214	4	0.000239961	1	Ccnd3 Hk1 Rcl1 Tmprss6
Hmg20b	22379998	Adverse_response_to_lamotrigine_and_phenytoin	6	70	2	0.000242283	1	Adamts20 Fhit
Foxo1	29083406	Allergic_disease_(asthma,_hay_fever_or_eczema)	51	103	4	0.000244042	1	Il7r Nfatc2 Rora Zfp365
Sall3	27028160_29112194	Cannabis_dependence_symptom_count	12	34	2	0.000247182	1	Col23a1 Pmm1
Hic1	27863252	Eosinophil_percentage_of_white_cells	88	110	5	0.000250725	1	Asb2 Bcl2l11 Bcl3 Lpp Trerf1
Elf1	26974007	Chronic_inflammatory_diseases_(ankylosing_spondylitis,_Crohn's_disease,_psoriasis,_primary_sclerosing_cholangitis,_ulcerative_colitis)_(pleiotropy)	93	306	8	0.000251437	1	Cd226 Ets1 Ifih1 Il18r1 Il2ra Ptpn2 Slc9a8 Thada
Nr4a2	27863252	High_light_scatter_reticulocyte_percentage_of_red_cells	99	98	5	0.000253662	1	Ehd3 Fam46c Itga4 Tmc6 Tmcc2
Zfp219	27863252	Eosinophil_percentage_of_granulocytes	82	185	6	0.000253774	1	Ankrd33b Ikzf3 Kdm6b Klf3 Spsb1 Trerf1
Dmrt2	29146897_18849991_22693459_27182965	Male-pattern_baldness	23	18	2	0.000258258	1	Ebf1 Hdac9
Sp4	27863252	Basophil_percentage_of_granulocytes	18	582	5	0.000258841	1	Bcl2 Chd7 Larp4b P2ry2 Ryr1
Jun	23259602_21940522_23064961	Dental_caries	26	390	5	0.00025925	1	Boc Celf2 Exoc2 Nt5dc1 Rps6ka2
Srebf1	27863252	Neutrophil_percentage_of_granulocytes	77	198	6	0.000259272	1	Apbb1ip Chd7 Ikzf3 Pparg Rad52 Trerf1
Sp4	27863252	Neutrophil_percentage_of_granulocytes	77	582	10	0.000259632	1	Bcl2 Brd3 Chd7 Ikzf3 Larp4b Lpp Nfkb1 Plaur Rasgrp4 Zc3h7b
Hoxb1	29292387	Depressive_symptoms_(MTAG)	22	99	3	0.000262997	1	Celf4 Dcc Sox6
Plagl1	27863252	High_light_scatter_reticulocyte_count	112	136	6	0.000263385	1	Ehd3 Itga4 Rreb1 S1pr2 Tmc6 Tmcc2
Gfi1	27863252	Sum_neutrophil_eosinophil_counts	66	149	5	0.00026632	1	Chd7 Glcci1 Pik3r3 Plaur S1pr2
Foxp1	27989323	Macrophage_inflammatory_protein_1a_levels	8	54	2	0.000267572	1	Zfp365 Zfp36l1
Gata1	23143596	Rheumatoid_arthritis_(ACPA-positive)	24	230	4	0.000268092	1	Gata3 Il2rb Rasgrp1 Stat4
Tcf7l1	28448500	Waist-to-hip_ratio_adjusted_for_BMI_in_active_individuals	18	123	3	0.000269138	1	Ccdc92 Dnm3 Klf13
Tbx21	25014791_21156761_20453842_21505073_20453841_19503088_17554300_28118524_18794853_24782177_23918589_24449572_21844665_21452313_23028356_23143596_22446963_24390342_17804836	Rheumatoid_arthritis	73	135	5	0.00027065	1	Ankrd55 Anxa3 Dpp4 Gata3 Prkch
Sall4	29403010_23022100	Serum_total_protein_level	17	131	3	0.000271452	1	Bcl2 Csf1 Ell2
Sp4	28193307_29403010_27863252_23314186_25096241	Monocyte_count	92	582	11	0.000271731	1	Acvrl1 Bcl2 Cdk6 Cnn2 Ets1 Fam46c Foxo1 Rpn1 Slc9a3r1 Tnfrsf1a Treml2
Zbtb46	28604730	Small_cell_lung_carcinoma	17	25	2	0.000272114	1	Dlc1 Scin
Zfp523	20195514_23704328	Primary_tooth_development_(time_to_first_tooth_eruption)	7	63	2	0.000273956	1	Cacnb2 Tex14
Esr1	29403010_22286170_27863252	Lymphocyte_counts	96	103	5	0.000277085	1	Etv1 Irf4 Nfkbia Scml4 Tle4
Spib	22139419_27863252_19221038_22423221_19110211_24026423_19820697	Mean_platelet_volume	145	198	8	0.000277502	1	Arhgef3 Dnm3 Ehd3 Iqgap2 Sav1 Stard10 Tesk2 Trim12c
Hic1	27863252	Granulocyte_percentage_of_myeloid_white_cells	90	110	5	0.000278445	1	Bcl2l11 Ccnd3 Itga4 Lpp Lsp1
Isl2	27863252	Neutrophil_percentage_of_white_cells	59	92	4	0.000278474	1	Antxr2 Dnmt3a Hormad2 Zfp36l2
Stat1	18758464_26192919_28067908_17068223_27569725_23128233_28008999	Inflammatory_bowel_disease	130	280	9	0.000278951	1	Ccnd3 Crem Il10 Il18r1 Lpp Nod2 Notch1 Sema6d Sox5
Tead1	27863252	Lymphocyte_percentage_of_white_cells	76	288	7	0.000279432	1	Cdk6 Ets1 Gimap7 Icam5 Il1rn Il2ra Stxbp6
Nfatc2	22883433_20185149_18347602_23212062_19571808_23894747_18677311_28991256_18282107_25056061_21926974_22688191_19571811_18332876_21682944_26198764_21679298_23974872_27922604_24043878_22037555_23358160_26531332_22885689_22037552_23142968	Schizophrenia	322	90	8	0.0002828	1	Abcb1a Cenpm Dlg2 Frmd4b Fyn Gramd1b Igsf9b Srpk2
Rel	28928442	Bacterial_meningitis	13	177	3	0.000283936	1	Inpp4b Nfat5 Slc6a9
Plagl2	26424050_28346443_22472174_29743610	Glioblastoma	10	44	2	0.000284017	1	Rhbdf1 Tert
Zfp420	29397368	Headache	15	29	2	0.000284252	1	Myo1h Ptbp2
Ets1	29403010_22286170_27863252	Lymphocyte_counts	96	383	9	0.000288118	1	Bcl2 Il2ra Klf3 L3mbtl3 Ly9 Ppard S1pr1 Ssh2 Zfp36l2
Irf1	21383967	Celiac_disease_or_Rheumatoid_arthritis	13	178	3	0.000288677	1	Ifi203 Ifi204 Ptpn2
Peg3	20041166_21051598	HIV-1_control	13	34	2	0.000291762	1	Nbea Sash1
Zfhx3	26041818_28181694	Pediatric_bone_mineral_content_(radius)	5	94	2	0.000292298	1	Agr3 Ndrg2
Fosl1	27863252	High_light_scatter_reticulocyte_count	112	259	8	0.000292508	1	Ank1 Ehd3 Itga4 Ncoa7 Rcl1 Rimklb Sept9 Stx7
Snapc2	27182965	Monobrow	20	22	2	0.000292552	1	Bmp7 Tcf25
Nfic	29403010_20139978_28453575_27863252_28017375	Red_blood_cell_count	115	48	4	0.000293952	1	Ccnd3 Cdk6 Fbln1 Tmc6
Rel	27863252	Eosinophil_percentage_of_white_cells	88	177	6	0.000294006	1	Bcl2a1b Bcl2a1d Bcl3 Il4ra Nfkb1 Smad3
Yy2	29403010	Total_bilirubin_levels	9	50	2	0.000294224	1	Auh Exoc6
Pou6f1	28158719_27863252_29403010	White_blood_cell_count_(basophil)	42	132	4	0.000295788	1	Apbb1ip Bcl2 Pten Zfpm1
Cebpb	27863252	High_light_scatter_reticulocyte_count	112	196	7	0.000295916	1	Bcl2 Fam46c Itga4 Sept9 Smox Specc1 Thrb
Ascl4	20303064_22703881_29403010	Activated_partial_thromboplastin_time	10	45	2	0.000297134	1	Apoh F5
Sp4	27863252	Monocyte_percentage_of_white_cells	93	582	11	0.000298959	1	Bcl2 Cdk6 Chd7 Ebf1 Foxo1 Lpp Nfkb1 Pik3ap1 Plaur Rpn1 Slc9a3r1
Crem	19820697	Hematological_parameters	7	66	2	0.000300714	1	Ptpn11 Tmprss6
Zic2	27863252	Reticulocyte_count	97	104	5	0.000304103	1	Arhgef3 Bcl2 Rreb1 Smox Tmc6
Gli1	29403010_19198610_27863252	Eosinophil_counts	104	97	5	0.000304103	1	Bcl2a1d Gata3 Ikzf2 Stxbp6 Tbx6
Foxo1	27863252	Sum_eosinophil_basophil_counts	98	103	5	0.000304958	1	Apbb1ip Kdm6b Nfatc2 Runx1 Zfp365
Spib	27089181	Positive_affect	12	198	3	0.000306084	1	Cacna2d1 Maml3 Stk4
Cebpg	27659466	QRS_complex_(12-leadsum)	13	182	3	0.000308155	1	Lrch1 Prkca Wipf1
Junb	27863252	Eosinophil_percentage_of_white_cells	88	115	5	0.000308179	1	Apbb1ip Ikzf3 Klf3 Nfatc2 Trerf1
Hic1	28193307_29403010_27863252_23314186_25096241	Monocyte_count	92	110	5	0.000308433	1	Bcl2l11 Ccnd3 Itga4 Lsp1 Ssbp4
Zfp219	21297633_24837172_26192919_28067908_23511034_19122664_19915572_20848476_25082827_23128233_20228798_20228799_19915573_28008999	Ulcerative_colitis	85	185	6	0.000308653	1	Bsn Cd28 Gpr65 Ptprc Stat4 Zfp831
Glis1	24489884	Anger	8	58	2	0.000308794	1	Abat Fyn
Ankzf1	27863252	Hemoglobin_concentration	65	35	3	0.000309127	1	Egln1 Pnpla3 Vegfa
Six5	27863252	Eosinophil_percentage_of_granulocytes	82	271	7	0.000309536	1	Apbb1ip Bcl2a1b Brd3 Dock3 Exoc2 Ikzf3 Kdm6b
Rag1	19389651_23463857	Electrocardiographic_conduction_measures	7	67	2	0.000309907	1	Scn5a Sfrp2
Foxb1	28193307_29403010_27863252_23314186_25096241	Monocyte_count	92	171	6	0.00031101	1	Ankrd55 Bcl2l11 Ccr2 Ccr3 Cnn2 Tnfrsf1a
Foxp2	23006423	Response_to_taxane_treatment_(docetaxel)	5	97	2	0.000311248	1	Cacna2d1 Slc6a6
Meis1	22922229	Autoimmune_thyroid_diseases_(Graves_disease_or_Hashimoto's_thyroiditis)	5	97	2	0.000311248	1	Lpp Prickle1
Zfp641	21297633_24837172_26192919_28067908_23511034_19122664_19915572_20848476_25082827_23128233_20228798_20228799_19915573_28008999	Ulcerative_colitis	85	27	3	0.000312599	1	Bsn Grid2ip Litaf
Rfx3	26831199	Glomerular_filtration_rate_in_non_diabetics_(creatinine)	27	85	3	0.000312599	1	Dnajc16 Phtf2 Skil
Pou6f1	27863252	Neutrophil_percentage_of_granulocytes	77	132	5	0.000313019	1	Apbb1ip Bcl2 Pten Zfp652 Zfpm1
Foxp1	29403010_19198610_27863252	Eosinophil_counts	104	54	4	0.000316073	1	Brd3 Pparg Tbx6 Zfp365
Nfatc4	23603761	Juvenile_idiopathic_arthritis_(oligoarticular_or_rheumatoid_factor-negative_polyarticular)	17	138	3	0.000316351	1	Cog6 Il2ra Prr5l
Nr4a3	19182806_27797806_22764253	Essential_tremor	7	68	2	0.000319236	1	Lingo1 Slc1a2
Zfp300	27863252	Platelet_distribution_width	101	23	3	0.000319449	1	Fam46c Inpp4b Iqgap2
Epas1	27863252	Eosinophil_percentage_of_white_cells	88	116	5	0.000320776	1	Brd3 Klf3 Nfatc2 Pparg Rasgrp4
Stat4	18464913	Protein_quantitative_trait_loci	22	265	4	0.000323632	1	Cacnb2 Dlg2 Eps8 Fam49b
Tal2	23006423	Response_to_taxane_treatment_(docetaxel)	5	99	2	0.000324208	1	Cacna2d1 Slc6a6
Tal2	20639881_25279986	Follicular_lymphoma	5	99	2	0.000324208	1	Gramd1b Lpp
Hic1	27863252	Monocyte_percentage_of_white_cells	93	110	5	0.000324314	1	Bcl2l11 Ccnd3 Itga4 Lpp Lsp1
Stat1	24347629_26962152	Periodontal_disease-related_phenotypes	9	280	3	0.000333288	1	Ifi203 Ifi204 Ifi205
Ets1	27863252	Sum_eosinophil_basophil_counts	98	383	9	0.000336352	1	Bcl2 Chd7 Exoc2 Klf3 Larp4b Rasgrp4 Spsb1 Zfp365 Zfpm1
Sox21	27015805	Parental_longevity_(mother's_age_at_death)	17	141	3	0.000336974	1	Peli2 Rbfox2 Twsg1
Foxn2	22700719_28165464_18758461_21131588_23770605_24292274_26956414	Chronic_lymphocytic_leukemia	35	67	3	0.000338085	1	Acoxl Bcl2l11 Qpct
Fosl2	27863252	Neutrophil_percentage_of_granulocytes	77	492	9	0.000341875	1	Asb2 Bcl2a1d Chd7 Klf3 Lpp Pten Rad52 Zfp365 Zfp652
Nfkb2	22293688_18587394_17554261_28067908_26891255_23850713_22412388_17554300_26192919_20570966_17684544_23266558_17435756_22936669_23128233_17804789_21102463_17447842_28008999	Crohn's_disease	113	199	7	0.000342536	1	Ankrd55 Bank1 Fermt1 Il2ra Rorc Thada Tnfsf15
Phf1	28282560	Carotid_plaque_burden	15	32	2	0.00034674	1	Kcnq5 Spire1
Stat3	21383967	Celiac_disease_or_Rheumatoid_arthritis	13	479	4	0.00034755	1	Ifi203 Mndal Ptpn2 Ubash3a
Sp140	23143596	Rheumatoid_arthritis_(ACPA-positive)	24	20	2	0.000349056	1	Irf5 Stat4
Esrra	25574825	Inflammatory_skin_disease	36	66	3	0.000351832	1	Pde4a Prr5l Slit3
Hmx3	29494758_23273568_18204447_26502338_24871463_23053960_25862617_21044949_21408207_18204098_20169177_29848360_18204446_19165918_28714469_26606652_22291604_26663301_26316170_19838193_19838195_27399966	Systemic_lupus_erythematosus	147	71	5	0.000352199	1	Ikzf2 Il10 Il12rb2 Irf7 Lpp
Nfkb1	22293688_18587394_17554261_28067908_26891255_23850713_22412388_17554300_26192919_20570966_17684544_23266558_17435756_22936669_23128233_17804789_21102463_17447842_28008999	Crohn's_disease	113	264	8	0.000353209	1	Ccnd3 Dnmt3a Fermt1 Il23r Impg2 Lpp Ptpn2 Smad3
Nr4a2	27863252	Neutrophil_percentage_of_white_cells	59	98	4	0.000354551	1	Acoxl Cdk6 Il1rn Nfkb1
Fosl2	18758464_26192919_28067908_17068223_27569725_23128233_28008999	Inflammatory_bowel_disease	130	492	12	0.000355783	1	Ankrd55 Crem Dnmt3b Ergic1 Hormad2 Ifngr2 Lpp Notch1 Sema6d Skap2 Smad3 Sox5
Twist1	28724990_28743860	Lean_body_mass	6	85	2	0.000357324	1	Calcr Vcan
Zfp960	27863252	Plateletcrit	126	83	5	0.000358089	1	Acvrl1 Prdm16 Rbpms Rcl1 Rnf150
Erg	21297633_24837172_26192919_28067908_23511034_19122664_19915572_20848476_25082827_23128233_20228798_20228799_19915573_28008999	Ulcerative_colitis	85	268	7	0.000361119	1	Bsn Cacna2d1 Cd28 Ets1 Hdac9 Litaf Rgs14
Xbp1	20081857	Two-hour_glucose_challenge	5	105	2	0.000364654	1	Adcy5 Tcf7l2
Srebf1	27863252	Eosinophil_percentage_of_granulocytes	82	198	6	0.000365155	1	Apbb1ip Chd7 Ikzf3 Pparg Rad52 Trerf1
Irf2	25014791_21156761_20453842_21505073_20453841_19503088_17554300_28118524_18794853_24782177_23918589_24449572_21844665_21452313_23028356_23143596_22446963_24390342_17804836	Rheumatoid_arthritis	73	223	6	0.000366308	1	Aff3 Anxa3 Arhgef3 Nfkbie Rasgrp1 Stat4
Trp53	27863252	Platelet_distribution_width	101	104	5	0.000366707	1	Dnm3 Iqgap2 Nrip1 Rin2 Txk
Pou2f2	27723758	Selective_IgA_deficiency	13	194	3	0.000371643	1	Cdh23 Gata3 Ptpn2
Zfp182	22139419_27863252_19221038_22423221_19110211_24026423_19820697	Mean_platelet_volume	145	157	7	0.000371913	1	Arhgef3 Bzw2 Cables1 Cnn2 Fam53b Tcf12 Tmcc2
Tcf7l1	28448500	Waist-to-hip_ratio_adjusted_for_BMI_(joint_analysis_for_main_effect_and_physical_activity_interaction)	20	123	3	0.000372095	1	Ccdc92 Dnm3 Klf13
Nfe2l2	27863252	Eosinophil_percentage_of_white_cells	88	185	6	0.000372432	1	Bcl2 Bcl3 Chd7 Nfatc2 Nfkb1 Zfpm1
Fosl1	26112879	LDL_peak_particle_diameter_(total_fat_intake_interaction)	10	259	3	0.000374384	1	Abcg2 Ncald Sox5
Nr4a2	29403010	Albumin-globulin_ratio	25	98	3	0.000376504	1	Acoxl Nfkb1 Traf3
Sox6	21829377_26584805	Plasma_omega-3_polyunsaturated_fatty_acid_levels_(docosahexaenoic_acid)	5	107	2	0.000378657	1	Sox5 Vav3
Sox6	23006423	Response_to_taxane_treatment_(docetaxel)	5	107	2	0.000378657	1	Cacna2d1 Ryr2
Egr2	25014791_21156761_20453842_21505073_20453841_19503088_17554300_28118524_18794853_24782177_23918589_24449572_21844665_21452313_23028356_23143596_22446963_24390342_17804836	Rheumatoid_arthritis	73	316	7	0.000381252	1	Acoxl Irf5 Nfkbie Rasgrp1 Rtkn2 Stat4 Ubash3a
Zfp229	29083406	Allergic_disease_(asthma,_hay_fever_or_eczema)	51	10	2	0.000381962	1	Il13 Zfp652
Bach1	29403010_22558069	Non-albumin_protein_levels	33	181	4	0.00038222	1	Dab2 Ebf1 Ell2 Nfkb1
Tead1	21507922_29403010_20172861_27863252_25096241	Neutrophil_count	80	288	7	0.000383624	1	Cdk6 Fads2 Il1rn Plcl1 S1pr2 Stxbp6 Thada
Runx1	27863252	Monocyte_percentage_of_white_cells	93	176	6	0.000384625	1	Bcl2l11 Ebf1 Eif4e3 Gcnt2 Kdm6b Pik3ap1
Irf1	28193307_29403010_27863252_23314186_25096241	Monocyte_count	92	178	6	0.000385382	1	Acoxl Nfkbie Rreb1 Ssh2 Treml2 Trps1
Nfe2	27863252	Lymphocyte_percentage_of_white_cells	76	304	7	0.000387233	1	Acoxl Antxr2 Ebf1 Il2ra Itga4 Ly9 Mxd3
Zfp300	27846195	Response_to_paliperidone_in_schizophrenia_(negative_Marder_score)	22	23	2	0.000388652	1	Iqgap2 Nrp1
Pou6f1	27846195	Response_to_paliperidone_in_schizophrenia_(PANSS_score)	19	132	3	0.000391156	1	B9d1 Cwh43 Nxn
Fosl1	29494758_23273568_18204447_26502338_24871463_23053960_25862617_21044949_21408207_18204098_20169177_29848360_18204446_19165918_28714469_26606652_22291604_26663301_26316170_19838193_19838195_27399966	Systemic_lupus_erythematosus	147	259	9	0.000391471	1	5430427O19Rik Ikzf2 Ikzf3 Lamc2 Lpp Ntng2 Rabgap1l Skap2 Slc29a3
Tcf12	27863252	Lymphocyte_percentage_of_white_cells	76	217	6	0.000394163	1	Antxr2 Dnmt3a Gimap7 H2-Ab1 Mxd3 Nlrc5
Zfp148	26390057_29403010_28135244_27618447_28739976_28498854	Pulse_pressure	77	301	7	0.000395395	1	Afap1 Cep68 Fn1 Gsn Plce1 Tcf7l1 Zfp318
Rel	18758464_26192919_28067908_17068223_27569725_23128233_28008999	Inflammatory_bowel_disease	130	177	7	0.000395897	1	Ergic1 Ets1 Ifngr2 Il2ra Lpxn Smad3 Tom1
Zfp281	21829377_26584805	Plasma_omega-3_polyunsaturated_fatty_acid_level_(eicosapentaenoic_acid)	11	238	3	0.000397515	1	Nav2 Papolg Runx1
Stat3	27863252	Sum_eosinophil_basophil_counts	98	479	10	0.000399901	1	Asb2 Chd7 Cog6 Il4ra Klf3 Lpp Pten Runx1 Smad3 Spsb1
Nfatc1	28644415	Western_dietary_pattern	8	66	2	0.000399959	1	Eea1 Itpr1
Nfatc2	17903296	Hip_geometry	6	90	2	0.000400552	1	Dlg2 Frmd4b
Zfp658	27863252	Granulocyte_percentage_of_myeloid_white_cells	90	6	2	0.000400552	1	Ccdc125 Dock10
Foxo1	29403010_19198610_27863252	Eosinophil_counts	104	103	5	0.00040144	1	Apbb1ip Ikzf3 Kdm6b Runx1 Zfp365
Elf1	27863252	Lymphocyte_percentage_of_white_cells	76	306	7	0.000402774	1	Ets1 Il2ra Itga4 Lin54 Plaur Rbpms Scml4
Batf	17558408_20190752_18311140_22057235_24999842_23936387	Celiac_disease	32	759	7	0.000405294	1	Ccr3 Frmd4b Irf4 Lpp Ptpn2 Wnt3 Zfp36l1
Irf4	29617998_24518671_25637523_22570627_29235454_24002674_28073927_25173106	Intraocular_pressure	116	822	15	0.000414641	1	Adamts17 Adamts6 Aff3 Ahrr Angpt1 Cav2 Cenpw Exoc2 Fez2 Fmnl2 Lmo7 Ptprj Sept9 Stox2 Tns1
Nr3c2	23017229_27989323	Monocyte_chemoattractant_protein-1_levels	29	87	3	0.000415156	1	Ccr3 Fyco1 Mndal
Fosl1	27863252	Granulocyte_percentage_of_myeloid_white_cells	90	259	7	0.000417331	1	Ank1 Cdk6 Eif4e3 Itga4 Kdm6b Lpp Lsp1
Stat4	27863252	Eosinophil_percentage_of_white_cells	88	265	7	0.000417369	1	Bcl2 Bcl3 Chd7 Klf3 Nfatc2 Runx1 Smad3
Fbxl19	19836008_22797724_20700438_28604730_20871597_27393504	Lung_adenocarcinoma	31	17	2	0.000420308	1	Numbl Tert
Irf8	18758464_26192919_28067908_17068223_27569725_23128233_28008999	Inflammatory_bowel_disease	130	128	6	0.000423875	1	Cd28 Ifih1 Impg2 Notch1 Stat4 Tm9sf4
Fli1	27863252	Neutrophil_percentage_of_granulocytes	77	141	5	0.000424018	1	Klf3 Tnfsf8 Trerf1 Zfp365 Zfp36l2
Tcf4	20852631_22452962_20585626_22951594_19330030_23535733_17903305_25751625_25327703_24143190_25038754_17529967_29059683_21908515_27117709_23354978_28171663_29058716_23468962_18326623_21424380_22383897_23535729_20872241_19330027_20453838_25956309_22976474_27354352_21263130_17529974_17529973_25824743_22037553	Breast_cancer	286	135	9	0.000430594	1	Ahrr Bcl2 Dmd Satb1 Tacc2 Tert Tns1 Traf3 Zfp365
Gata1	25014791_21156761_20453842_21505073_20453841_19503088_17554300_28118524_18794853_24782177_23918589_24449572_21844665_21452313_23028356_23143596_22446963_24390342_17804836	Rheumatoid_arthritis	73	230	6	0.000431694	1	Gata3 Il2rb Nfkbie Rasgrp1 Stat4 Ubash3a
Elf1	17903302	Tonometry	9	306	3	0.000432442	1	Prex1 Slc9a9 Syne1
Elk3	27790247	Age-related_diseases,_mortality_and_associated_endophenotypes	24	261	4	0.00043325	1	Itpk1 Maml3 Plcg1 Zfhx3
Foxb1	21804548_21814517_17611496_21907864_26620591_28461288_23028483_27182965_21804549_21150878_22561531_20032318_29273806_20159242_27611488_20860503_19426955	Asthma	64	171	5	0.000434635	1	Etv6 Gab1 Il18r1 Rora Zpbp2
Arid3a	27846195	Response_to_paliperidone_in_schizophrenia_(PANSS_score)	19	137	3	0.000436154	1	Nxn Prlr Tox
Dmrta2	28193307_29403010_27863252_23314186_25096241	Monocyte_count	92	28	3	0.000440194	1	Dusp14 Thrb Trps1
Spib	21297633_24837172_26192919_28067908_23511034_19122664_19915572_20848476_25082827_23128233_20228798_20228799_19915573_28008999	Ulcerative_colitis	85	198	6	0.000443275	1	Cacna2d1 Cd28 Ergic1 Hdac9 Ptprc Rgs14
Peg3	28084903_26169577	Cough_in_response_to_angiotensin-converting_enzyme_inhibitor_drugs	16	34	2	0.000447199	1	Mmp16 Tgfa
Hoxd11	21151127_27992413	Primary_sclerosing_cholangitis	14	39	2	0.000448005	1	Cd226 Ubash3a
Zic2	29403010	Albumin-globulin_ratio	25	104	3	0.000448203	1	Bcl2 Fads2 Reps1
Nr4a2	27863252	High_light_scatter_reticulocyte_count	112	98	5	0.000448883	1	Ehd3 Fam46c Itga4 Tmc6 Tmcc2
Stat3	27863252	Eosinophil_percentage_of_granulocytes	82	479	9	0.00045148	1	Asb2 Chd7 Cog6 Klf3 Lpp Pten Runx1 Smad3 Spsb1
Irf9	27015805	Parental_extreme_longevity_(95_years_and_older)	32	81	3	0.000452086	1	Gbp10 Gbp6 Gbp9
Tcf12	27680694_20372150_23202124	Birth_weight	29	217	4	0.000456732	1	Atad2b Cenpm L3mbtl3 Plekha1
Gli1	26708676_27997041_24262325_26732560_26089329_29531354	Ischemic_stroke	27	97	3	0.000460821	1	Fut8 Lmna Zfhx3
Nkx3-1	23817569	Self-reported_allergy	12	228	3	0.000462793	1	Adad1 Nfatc2 Plcl1
Nkx3-1	19300499_18535201_20833655_26265036	Warfarin_maintenance_dose	12	228	3	0.000462793	1	Cacna1c Chn2 Zfp646
Nkx3-1	25811787	Urate_levels_in_overweight_individuals	12	228	3	0.000462793	1	Abcg2 Dlg2 Znhit6
Pou2af1	25014791_21156761_20453842_21505073_20453841_19503088_17554300_28118524_18794853_24782177_23918589_24449572_21844665_21452313_23028356_23143596_22446963_24390342_17804836	Rheumatoid_arthritis	73	152	5	0.000467126	1	Arhgef3 D1Ertd622e Fads2 Gata3 Irf5
Pou2f2	21151127_27992413	Primary_sclerosing_cholangitis	14	194	3	0.000469081	1	Cd226 Gngt2 Ubash3a
Stat1	21297633_24837172_26192919_28067908_23511034_19122664_19915572_20848476_25082827_23128233_20228798_20228799_19915573_28008999	Ulcerative_colitis	85	280	7	0.000469545	1	Il10 Il7r Nfkb1 Notch1 Procr Ptprc Sema6d
Klf5	25673412_26785701_28448500_28270201_28430825_27195708	Waist-to-hip_ratio_adjusted_for_body_mass_index	41	153	4	0.000471693	1	Ccdc92 Nid2 Plce1 Rfx7
Ebf1	27863252	Reticulocyte_fraction_of_red_cells	106	224	7	0.000472939	1	Arhgef3 Bcl2l11 Cav1 Ehd3 Riok3 Smox Stx7
Gata1	23740937	Systemic_lupus_erythematosus_and_Systemic_sclerosis	12	230	3	0.000474759	1	Ikzf3 Itgam Stat4
Aebp1	20485516_29760442_23493294_20719862_28171582	Central_corneal_thickness	28	20	2	0.000476723	1	Fbn1 Ltbp1
Epas1	29403010_22286170_27863252	Lymphocyte_counts	96	116	5	0.000479561	1	Klf3 Lta Ppard Ptprc Zfp36l2
Runx2	21297633_24837172_26192919_28067908_23511034_19122664_19915572_20848476_25082827_23128233_20228798_20228799_19915573_28008999	Ulcerative_colitis	85	201	6	0.000480018	1	Cyth1 Ets1 Gpr65 Il23r Procr Stat4
Rela	28090653	Alanine_aminotransferase_(ALT)_levels_after_remission_induction_therapy_in_actute_lymphoblastic_leukemia_(ALL)	22	122	3	0.000485705	1	Pnpla3 Raph1 Zdhhc18
Nfkb1	27723757_19890347_21326295_20526339_20410501_22951725_22561518	Vitiligo	43	264	5	0.000489898	1	Fli1 Irf4 Lpp Ptprc Slc1a2
Ankzf1	29403010_27863252_28017375_28453575_19862010_29615537	Hematocrit	76	35	3	0.00048996	1	Egln1 Pnpla3 Vegfa
Rorc	21297633_24837172_26192919_28067908_23511034_19122664_19915572_20848476_25082827_23128233_20228798_20228799_19915573_28008999	Ulcerative_colitis	85	371	8	0.000492003	1	Cyth1 Ets1 Gpr65 Il23r Il7r Prdm1 Ptpn2 Rorc
Hsf1	23143596	Rheumatoid_arthritis_(ACPA-positive)	24	112	3	0.000492209	1	Cog6 Rel Stat4
L3mbtl3	25574825	Inflammatory_skin_disease	36	74	3	0.000492718	1	Cs Il23r Pde4a
Fosl2	27863252	Sum_eosinophil_basophil_counts	98	492	10	0.000493104	1	Asb2 Auh Chd7 Il4ra Klf3 Lpp Pten Ptprc Smad3 Zfp365
Zfp467	24388013	Asthma_and_hay_fever	9	65	2	0.00049755	1	Tns1 Vav3
Tcf7l1	23319000	Metabolite_levels_(HVA-5-HIAA_Factor_score)	5	123	2	0.000500047	1	Kif13b Vgll4
Nfe2l2	27863252	Monocyte_percentage_of_white_cells	93	185	6	0.000501171	1	Bcl2 Chd7 Dock10 Nfkb1 Nfkbie Rpn1
Esrra	29403010_22286170_27863252	Lymphocyte_counts	96	66	4	0.000503737	1	Ccr7 Dnmt3a Ptprc Tnfrsf1a
Etv1	26708676_27997041_24262325_26732560_26089329_29531354	Ischemic_stroke	27	100	3	0.000503809	1	F5 Fut8 Zfhx3
Junb	27863252	Sum_eosinophil_basophil_counts	98	115	5	0.00050669	1	Apbb1ip Klf3 Nfatc2 Spsb1 Trerf1
Zfp369	21383967	Celiac_disease_or_Rheumatoid_arthritis	13	45	2	0.000512466	1	Ifi203 Mndal
Hmx2	29213071_19305408_19305409_16648850_22726844_24952745_23166209_20031603_23534349	QT_interval	66	41	3	0.000518143	1	Crebbp Hao1 Scn5a
Hdx	18835860_24429156_29066090	Idiopathic_pulmonary_fibrosis	7	87	2	0.000522329	1	Dsp Mdga2
Relb	24262325_27997041	Large_artery_stroke	5	126	2	0.000524656	1	Hdac9 Tmem163
Patz1	27863252	Plateletcrit	126	51	4	0.000525487	1	Bcl2 Hbs1l Pnpla3 Thada
Lhx6	28654678	Epstein-Barr_virus_copy_number_in_lymphoblastoid_cell_lines	20	139	3	0.000532191	1	Fam129a Tmed3 Ttn
Srebf1	17463246_28371326_28334899_26763881	LDL_cholesterol_levels	33	198	4	0.000536493	1	Dock7 Fads2 Hmgcr Pfas
Irf8	29531354_26708676	Ischemic_stroke_(cardioembolic)	5	128	2	0.000541385	1	Hk1 Zfhx3
Zfp182	25014791_21156761_20453842_21505073_20453841_19503088_17554300_28118524_18794853_24782177_23918589_24449572_21844665_21452313_23028356_23143596_22446963_24390342_17804836	Rheumatoid_arthritis	73	157	5	0.000541414	1	Aff3 Arhgef3 Prkch Ptpn2 Smtnl2
Tbx21	21297633_24837172_26192919_28067908_23511034_19122664_19915572_20848476_25082827_23128233_20228798_20228799_19915573_28008999	Ulcerative_colitis	85	135	5	0.000548317	1	Cd28 Gpr35 Gramd1b Notch1 Sema6d
Meis2	24850809	PR_segment	5	129	2	0.000549847	1	Cav1 Lrch1
Stat3	27386562_18941528_20453840_18997785_21654844_21244703_24076602_28445677_21833088_23412934_19010793_20598377_17660530_19525955_22457343_19525953_22190364	Multiple_sclerosis	102	479	10	0.000551073	1	Alpk2 Asap1 Cdh3 Cog6 Galc L3mbtl3 Lpp Malt1 Rreb1 Zbtb46
Fli1	27694959	Gut_microbiota_(functional_units)	20	141	3	0.000554844	1	Cd86 Slc9a9 Sorcs2
Mef2b	27989323	Interleukin-8_levels	8	78	2	0.00055838	1	Auts2 Thra
Irf2	21383967	Celiac_disease_or_Rheumatoid_arthritis	13	223	3	0.000558475	1	Ifi203 Mndal Stat4
Lcor	27863252	Granulocyte_percentage_of_myeloid_white_cells	90	31	3	0.000559878	1	Eif4e3 Lpp Lsp1
Zfp420	29531354_17434096_26089329_22306652_19369658	Stroke	21	29	2	0.000564949	1	Hdac9 Impa2
Meis1	26390057_29403010_28548082_27618447_28739976_28135244_28270201_29615537_25249183_28498854_19430483_29208002_21909115_19430479_29212154_26969751	Diastolic_blood_pressure	119	97	5	0.000565143	1	Lpp Pkhd1 Prex1 Sox6 Tns1
Sp4	27863252	Basophil_percentage_of_white_cells	21	582	5	0.000565159	1	Bcl2 Chd7 Larp4b P2ry2 Ryr1
Myb	26390057_29403010	Mean_arterial_pressure	21	135	3	0.000566872	1	Casz1 Cdkn1b Hdac4
Nfkb1	26974007	Chronic_inflammatory_diseases_(ankylosing_spondylitis,_Crohn's_disease,_psoriasis,_primary_sclerosing_cholangitis,_ulcerative_colitis)_(pleiotropy)	93	264	7	0.000570667	1	Dnmt3a Il18r1 Il1r1 Il23r Nfkb1 Ptpn2 Smad3
Etv5	22293688_18840781_17554260_17554300_19966805_18198356_25751624_17632545_21829393_18978792_21980299_19430480	Type_1_diabetes	40	70	3	0.000572352	1	Cenpw Rasgrp1 Ubash3a
Pou6f1	21873549	Proinsulin_levels	5	132	2	0.000575619	1	Sgsm2 Tcf7l2
Zfp628	29292387_27089181	Subjective_well-being	39	72	3	0.00057669	1	Angpt1 Srpk2 Vat1l
Pou6f1	27863252	Eosinophil_percentage_of_white_cells	88	132	5	0.000580325	1	Apbb1ip Bcl2 Pten Zfp652 Zfpm1
Srebf1	24097068_27036123_23067351_26582766_23726366_26780889_18193044_21059979_19060910_19060911_25961943_21347282_20686565_20864672_19060906_18179892_18193043	LDL_cholesterol	59	198	5	0.000580888	1	Dock7 Fads2 Hmgcr Pfas Rnf130
Stat4	26974007	Chronic_inflammatory_diseases_(ankylosing_spondylitis,_Crohn's_disease,_psoriasis,_primary_sclerosing_cholangitis,_ulcerative_colitis)_(pleiotropy)	93	265	7	0.000583603	1	Ifih1 Ifngr2 Il2ra Prdm1 Ptpn2 Sbno2 Smad3
Dlx3	24839885	Preschool_internalizing_problems	7	92	2	0.000583894	1	Pde6c Ripk1
Isl2	20708005	Non-alcoholic_fatty_liver_disease_histology_(lobular)	7	92	2	0.000583894	1	Cacna2d1 Slc9a9
Foxs1	24823311	Plasma_omega-6_polyunsaturated_fatty_acid_levels_(adrenic_acid)	5	133	2	0.000584339	1	Reep3 Slc1a2
Mlxipl	22493691_27182965	Hypothyroidism	16	39	2	0.000589086	1	Pde10a Tg
Zic2	27863252	High_light_scatter_reticulocyte_count	112	104	5	0.000589386	1	Bcl2 H2-Q10 Rreb1 Smox Tmc6
Foxb1	23603761	Juvenile_idiopathic_arthritis_(oligoarticular_or_rheumatoid_factor-negative_polyarticular)	17	171	3	0.000592384	1	Ankrd55 Ccr3 Il2ra
Foxb1	26301688	Pediatric_autoimmune_diseases	17	171	3	0.000592384	1	Ankrd55 Il23r Il2ra
Bhlhe41	27723757_19890347_21326295_20526339_20410501_22951725_22561518	Vitiligo	43	66	3	0.000596576	1	Fads2 Tef Tg
Fosb	27863252	Neutrophil_percentage_of_granulocytes	77	86	4	0.000596813	1	Bcl2a1d Bcl2l11 Exoc2 Plaur
Ascl4	27918534_22589738_26480920_29178545	Subcutaneous_adipose_tissue	14	45	2	0.000596882	1	Pms1 Stxbp6
Zeb1	29403010_19198610_27863252	Eosinophil_counts	104	171	6	0.000600121	1	Bcl2a1d Cd200r1 Cog6 Dock3 Lpp Smad3
Zfp334	27863252	Immature_fraction_of_reticulocytes	73	39	3	0.000600465	1	Arid3a Cav1 S1pr2
Hmga2	20966902_20189936_21998595_19893584_23456168_25133637_25429064_20397748_23563607_22021425_20668459_20881960_29782485_18391952_19396169_19570815_17767157_18391950_19030899_18952825_18193045_19729412_18391951_19343178_25282103_28270201	Height	264	153	9	0.000601477	1	Cdk6 Erc1 Fastkd2 Loxl1 Lpar1 Ltbp1 Sh3gl3 Sulf1 Tns1
Tcf4	20639881_25279986	Follicular_lymphoma	5	135	2	0.000601972	1	Cd86 Gramd1b
Nhlh1	22443383_17903294	Hemostatic_factors_and_hematological_phenotypes	8	81	2	0.000602027	1	F5 Mdga2
Gata1	27723758	Selective_IgA_deficiency	13	230	3	0.000611112	1	Cd86 Gata3 Ikzf3
Rel	27863252	Platelet_distribution_width	101	177	6	0.000616011	1	Fam46c Inpp4b Iqgap2 Nck2 Rin2 Vav1
Lcor	27863252	Monocyte_percentage_of_white_cells	93	31	3	0.000616174	1	Eif4e3 Lpp Lsp1
Ybx2	20195514_23704328	Primary_tooth_development_(number_of_teeth)	6	112	2	0.000619559	1	Igf2bp1 Msrb3
Sox5	27639821	Mortality_in_sepsis	5	137	2	0.000619863	1	Crispld2 Vps13a
Zfp420	18997786_22286173_22961961_29531279_25256182_20364137	Intracranial_aneurysm	22	29	2	0.000620795	1	Ccdc80 Hdac9
Sox12	28540026	Autism_spectrum_disorder_or_schizophrenia	64	45	3	0.000623421	1	Cacna1c Ddr1 H2-DMb1
Cux1	27918534_22589738_26480920_29178545	Subcutaneous_adipose_tissue	14	46	2	0.000623723	1	Lhpp Smad6
Sp140	29494758_23273568_18204447_26502338_24871463_23053960_25862617_21044949_21408207_18204098_20169177_29848360_18204446_19165918_28714469_26606652_22291604_26663301_26316170_19838193_19838195_27399966	Systemic_lupus_erythematosus	147	20	3	0.000626492	1	Irf5 Skap2 Stat4
Lyl1	28540026	Autism_spectrum_disorder_or_schizophrenia	64	105	4	0.000628592	1	Ddr1 Fhit H2-DMb1 Pbx2
Maf	23740937	Systemic_lupus_erythematosus_and_Systemic_sclerosis	12	613	4	0.000628923	1	Ikzf3 Jazf1 Samd9l Stat4
Nfatc4	18758464_26192919_28067908_17068223_27569725_23128233_28008999	Inflammatory_bowel_disease	130	138	6	0.000631581	1	Ccnd3 Cd226 Cdyl2 Fermt1 Fosl2 Il2ra
Irf4	29403010_22286170_27863252	Lymphocyte_counts	96	822	13	0.000633055	1	Acoxl Antxr2 Atp2b4 Bcl2 Ccr7 Dnmt3a Icam1 Ikbke Irf4 Ly9 Rilpl2 Ssh2 Zfp831
Zfp629	23000144_26394269_21399635_28062665_19458352_20639880_28425483	Primary_biliary_cholangitis	32	91	3	0.000635646	1	Ikzf3 Spib Syngr1
Batf	23612905_21900946_22922229_21841780	Graves'_disease	10	759	4	0.000637932	1	Lpp Prickle1 Slamf6 Tg
Batf	25130324	Heschl's_gyrus_morphology	10	759	4	0.000637932	1	Cd28 Fbn2 Prkca Tnfaip8
Sox4	22139419_27863252_19221038_22423221_19110211_24026423_19820697	Mean_platelet_volume	145	124	6	0.000638762	1	Bzw2 Cnn2 Fam46c Slc24a3 Tbc1d14 Vav1
Etv2	24347629_26962152	Periodontal_disease-related_phenotypes	9	74	2	0.00064452	1	Ifi203 Ifi205
Elk3	29403010_22286170_27863252	Lymphocyte_counts	96	261	7	0.000645591	1	Antxr2 Fam49b Ikzf3 Klf3 Lta Ppard Rreb1
Arnt2	23562823_21441570_21310492	Diabetic_retinopathy	8	84	2	0.000647284	1	Arhgap22 Creb5
Hhex	26379185	Influenza_A_(H1N1)_infection	8	84	2	0.000647284	1	Dmd L3mbtl3
Thrb	26831199	Glomerular_filtration_rate_in_non_diabetics_(creatinine)	27	109	3	0.000647972	1	Cacna1s Nfatc1 Skil
Satb1	28441456	Facial_morphology_(factor_15,_philtrum_width)	12	256	3	0.000648837	1	Lonp2 Nxn Rab33a
Rel	27386562_18941528_20453840_18997785_21654844_21244703_24076602_28445677_21833088_23412934_19010793_20598377_17660530_19525955_22457343_19525953_22190364	Multiple_sclerosis	102	177	6	0.000649009	1	Cxcr5 Ets1 Ifngr2 Il2ra Il7r Plekhg5
Batf	29403010_19198610_27863252	Eosinophil_counts	104	759	13	0.000652293	1	Asb2 Auh Bcl2a1d Bcl2l11 Cd200r1 Ikzf2 Klf3 Lpp Pten Rasgrp4 Spsb1 Tbx6 Zfp365
Meis2	23512250_29348612_23007406_19684603_19684604_22076464_25310577	Acute_lymphoblastic_leukemia_(childhood)	23	129	3	0.000653812	1	Ddc Lhpp Ptprj
Rel	29403010_21900944	Aspartate_aminotransferase_levels	17	177	3	0.000654943	1	Akna Cacnb2 Pnpla3
Fli1	25342443	Mammographic_density_(dense_area)	5	141	2	0.000656418	1	Tmem184b Zfp365
Ebf1	27863252	High_light_scatter_reticulocyte_count	112	224	7	0.0006584	1	Bcl2l11 Cav1 Ehd3 Rcl1 Riok3 Smox Stx7
Prdm16	20932654	Erectile_dysfunction_and_prostate_cancer_treatment	10	67	2	0.000659087	1	Cnnm3 Ptgfrn
Zkscan1	27021288_26184070	Oppositional_defiant_disorder_dimensions_in_attention-deficit_hyperactivity_disorder	8	85	2	0.000662727	1	Bmp7 Sox5
Stat3	23259602_21940522_23064961	Dental_caries	26	479	5	0.000664488	1	Abcg2 Celf2 Maf Nt5dc1 Sidt1
Maf	27863252	Reticulocyte_count	97	613	11	0.000665494	1	Arhgef3 Atxn1 Bmp7 Dnaja4 Hbs1l Iqgap2 Rimklb Smox Stx7 Tmc6 Zfpm1
Foxs1	27863252	Granulocyte_percentage_of_myeloid_white_cells	90	133	5	0.000665537	1	Bcl2a1d Chd7 Cxcl5 Foxo1 Trps1
Irf1	25865494	Sitting_height_ratio	17	178	3	0.000665763	1	Cables1 Nfatc2 Slc39a8
Snai2	28604730	Lung_cancer_in_ever_smokers	41	72	3	0.000668649	1	Fads2 H2-Ob Lmna
Bcl6b	28584286	Cognitive_empathy	30	99	3	0.000670592	1	Adamts20 Phlpp1 Shroom3
Atf3	21829377_26584805	Plasma_omega-3_polyunsaturated_fatty_acid_level_(eicosapentaenoic_acid)	11	285	3	0.000672825	1	Elovl2 Nav2 Runx1
Zfp281	23897914	Bronchopulmonary_dysplasia	13	238	3	0.000675054	1	Cep170 Klf12 Tnk2
Prdm1	27863252	High_light_scatter_reticulocyte_percentage_of_red_cells	99	184	6	0.000679144	1	Bzw2 Ehd3 Fam46c Riok3 S1pr2 Sema4d
Zfp281	27863252	Neutrophil_percentage_of_granulocytes	77	238	6	0.000688111	1	Bcl2l11 Plaur Pten Runx1 Tnfsf8 Trerf1
Nfe2	29875488_28240269	Blood_protein_levels	620	304	23	0.000688136	1	Alcam Bsn C3 Col18a1 Col7a1 Ebf1 Gnptab H2-Eb1 Havcr2 Igf2r Lamc1 Lrig3 Ly9 Mgat5 Nucb2 Plxnc1 Proz Qrich1 Ret Sema4d Smpd3 Spint1 Tmprss6
Homez	29292387	Subjective_well-being_(MTAG)	21	32	2	0.000688663	1	Serpinc1 Vrk2
Gtf2ird1	23143596	Rheumatoid_arthritis_(ACPA-positive)	24	28	2	0.000689721	1	Dnase1l3 Gata3
Elk3	26831199	Glomerular_filtration_rate_in_non_diabetics_(creatinine)	27	261	4	0.000690449	1	Cacna1s Skil Slc22a2 Ube2q2
Prrx1	28654678	Epstein-Barr_virus_copy_number_in_lymphoblastoid_cell_lines	20	152	3	0.000690526	1	Dlc1 Fam129a Tmed3
Irf4	27846195	Response_to_paliperidone_in_schizophrenia_(positive_Marder_score)	16	822	5	0.000691623	1	B9d1 Cacna1s Cwh43 Pomt2 Rnf135
Mxi1	24578379	Plasma_plasminogen_activator_levels	5	145	2	0.000694003	1	Serpine1 Stx2
Tead1	27863252	Sum_basophil_neutrophil_counts	64	288	6	0.000694253	1	Cdk6 Fads2 Il1rn S1pr2 Stxbp6 Thada
Nfkb2	28193307_29403010_27863252_23314186_25096241	Monocyte_count	92	199	6	0.000694367	1	Ankrd55 Dusp14 Ets1 Lsp1 Nfkbie Nostrin
Nr1d1	18758464_26192919_28067908_17068223_27569725_23128233_28008999	Inflammatory_bowel_disease	130	93	5	0.000696905	1	Cd226 Cd28 Gpr65 Il23r Impg2
Rbpj	26708676_27997041_24262325_26732560_26089329_29531354	Ischemic_stroke	27	112	3	0.000701286	1	Fut8 Lrch1 Zfhx3
Sohlh1	28604730	Small_cell_lung_carcinoma	17	40	2	0.000701356	1	Crtam Dlc1
Zfp105	20639881_25279986	Follicular_lymphoma	5	146	2	0.000703559	1	Cd86 Gramd1b
Zfp612	24827717_28892062_20966902_24064335_24348519_20935630_28448500_25133637_18454148_20397748_27296613_23563607_22344219_28296344_23669352_23583978_17434869_25760438_25673413_26865924_24861553_19079260_19079261_25953783_26426971_22982992_28270201_19851299_22446040	Body_mass_index	235	30	4	0.00070378	1	Cadm1 Dock1 Nid2 Robo1
Zfp148	25673412_26785701_28448500_28270201_28430825_27195708	Waist-to-hip_ratio_adjusted_for_body_mass_index	41	301	5	0.000709643	1	Bcl2 Klf13 Plce1 Rfx7 Snx10
Stat5b	25224454_21149283_19820699_21483845_19084217_21208937	Iron_status_biomarkers	11	63	2	0.000710754	1	Arsb Tmprss6
Pou6f1	28193307_29403010_27863252_23314186_25096241	Monocyte_count	92	132	5	0.000710917	1	Ankrd55 Bcl2 Ccnd3 Rpn1 Ssh2
Myb	27863252	Granulocyte_percentage_of_myeloid_white_cells	90	135	5	0.000712079	1	Ccdc125 Cdk6 Dock10 Glcci1 Itga4
Stat4	23817569	Self-reported_allergy	12	265	3	0.000717439	1	Il2ra Nfatc2 Smad3
Stat4	25811787	Urate_levels_in_overweight_individuals	12	265	3	0.000717439	1	Abcg2 Dlg2 Dysf
Hmg20b	19584346_28394258_21223598	Aortic_root_size	10	70	2	0.000719229	1	Fhit Kctd7
Irf8	27790247	Age-related_diseases,_mortality_and_associated_endophenotypes	24	128	3	0.000726517	1	Bcl3 Plcg1 Zfhx3
Cebpb	18758464_26192919_28067908_17068223_27569725_23128233_28008999	Inflammatory_bowel_disease	130	196	7	0.000726832	1	Cd226 Cdyl2 Crem Ergic1 Ifih1 Lpxn Smad3
Hbp1	29403010_22286170_27863252	Lymphocyte_counts	96	73	4	0.000738442	1	Ets1 Fam49b Irf4 S1pr1
Atf3	23382691	IgG_glycosylation	146	285	9	0.000741127	1	Abi3 Ccdc40 Ell2 Epas1 Fmnl2 Igf2bp3 Lbp Rell1 Ski
Fosl1	27863252	High_light_scatter_reticulocyte_percentage_of_red_cells	99	259	7	0.000741701	1	Ank1 Ehd3 Itga4 Rcl1 Rimklb Sept9 Stx7
Gzf1	27863252	Monocyte_percentage_of_white_cells	93	33	3	0.000742086	1	Ccrl2 Ifitm2 Pdgfrb
Nfatc2	26379185	Influenza_A_(H1N1)_infection	8	90	2	0.000742614	1	Dlg2 L3mbtl3
Zfp219	23603761	Juvenile_idiopathic_arthritis_(oligoarticular_or_rheumatoid_factor-negative_polyarticular)	17	185	3	0.000744726	1	Ankrd55 Stat4 Zfp36l1
Tcf7l1	23319000	Metabolite_levels_(HVA)	6	123	2	0.000746559	1	Kif13b Vgll4
Pou6f1	27863252	Monocyte_percentage_of_white_cells	93	132	5	0.000746742	1	Bcl2 Ccnd3 Eif4e3 Pik3ap1 Rpn1
Dbp	27386562_18941528_20453840_18997785_21654844_21244703_24076602_28445677_21833088_23412934_19010793_20598377_17660530_19525955_22457343_19525953_22190364	Multiple_sclerosis	102	69	4	0.000749524	1	Chst12 Il2ra L3mbtl3 Stat4
Dmrt1	17903302	Tonometry	9	80	2	0.00075282	1	Slc9a9 Syne1
Ppard	27005419	Erythrocyte_cadmium_concentration_in_never_smokers	6	124	2	0.000758679	1	Psd3 Slc39a8
Ppard	23717212_22895189_19465909	Malaria	6	124	2	0.000758679	1	Atp2b4 Ddc
Ar	27702941	Caffeine_metabolism_(plasma_1,7-dimethylxanthine_(paraxanthine)_to_1,3,7-trimethylxanthine_(caffeine)_ratio)	6	124	2	0.000758679	1	Ahr Clk3
Cic	23612905_21900946_22922229_21841780	Graves'_disease	10	72	2	0.000760749	1	Il2ra Lpp
Rara	29186694	Cognitive_ability	28	111	3	0.00076162	1	Aff3 Dpp4 Sh2b1
Prrx1	21829377_26584805	Plasma_omega-3_polyunsaturated_fatty_acid_levels_(docosahexaenoic_acid)	5	152	2	0.000762248	1	Sox5 Vav3
Arid3b	23897914	Bronchopulmonary_dysplasia	13	55	2	0.000765429	1	Fhit Plxdc2
Six5	28441456	Facial_morphology_(factor_15,_philtrum_width)	12	271	3	0.000765661	1	Lonp2 Npas2 Nxn
Sp4	27863252	Eosinophil_percentage_of_white_cells	88	582	10	0.00076682	1	Bcl2 Bcl3 Brd3 Chd7 Dock3 Ikzf3 Lpp Nfkb1 Rasgrp4 Zc3h7b
Nhlh1	25786224_22174851_21160409	HIV-1_susceptibility	9	81	2	0.00077167	1	Frmpd1 Nav2
Irf9	24347629_26962152	Periodontal_disease-related_phenotypes	9	81	2	0.00077167	1	Ifi203 Ifi204
Foxs1	27863252	Monocyte_percentage_of_white_cells	93	133	5	0.000772637	1	Bcl2a1d Chd7 Cxcl5 Foxo1 Trps1
Nr1i3	28158719_27863252_29403010	White_blood_cell_count_(basophil)	42	17	2	0.00077329	1	Apbb1ip Helb
Runx3	21546767	Dialysis-related_mortality	7	106	2	0.000774139	1	Pdzrn3 Sh3bp4
Runx2	27863252	Monocyte_percentage_of_white_cells	93	201	6	0.000774582	1	Bcl2a1b Bcl2a1d Ebf1 Pik3ap1 Slc9a3r1 Trps1
Sall3	29531354_17434096_26089329_22306652_19369658	Stroke	21	34	2	0.000777766	1	Cdk6 Zfhx3
Bcl11b	28604730	Lung_cancer_in_ever_smokers	41	175	4	0.00078132	1	Ddr1 Fads2 Ncoa1 Trim26
Relb	24920014_29196614_24149102_21037568_22286212	Hodgkin's_lymphoma	6	126	2	0.000783208	1	Gata3 Il13
Maf	29494758_23273568_18204447_26502338_24871463_23053960_25862617_21044949_21408207_18204098_20169177_29848360_18204446_19165918_28714469_26606652_22291604_26663301_26316170_19838193_19838195_27399966	Systemic_lupus_erythematosus	147	613	14	0.00078419	1	Atxn1 Cd80 H2-Aa Ifih1 Ikbke Ikzf3 Il10 Irf5 Jazf1 Lbh Pld2 Stat4 Tnfsf4 Traf3
Fli1	29403010_27863252_22139419_25705162_23263863_26805783_21507922_20139978_24026423_29066854	Platelet_count	183	141	7	0.000784658	1	Abcb9 Actn1 Ehd3 Ldlrap1 Mylk2 Tnfrsf1a Zfp36l2
Nfatc4	27863252	Granulocyte_percentage_of_myeloid_white_cells	90	138	5	0.000786405	1	Bcl2a1d Ccdc125 Ccnd3 Glcci1 Trps1
Rarg	27863252	Hemoglobin_concentration	65	192	5	0.000789587	1	Dnm3 Gprc5a Rgs14 Sbf2 Vav2
Thap1	27723756	Gut_microbiota_(beta_diversity)	9	82	2	0.000790747	1	Abhd2 Slc9a8
Elf1	21297633_24837172_26192919_28067908_23511034_19122664_19915572_20848476_25082827_23128233_20228798_20228799_19915573_28008999	Ulcerative_colitis	85	306	7	0.000793931	1	Cd226 Ergic1 Ets1 Plcl1 Ptpn2 Rgs14 Stat4
Nr4a2	25014791_21156761_20453842_21505073_20453841_19503088_17554300_28118524_18794853_24782177_23918589_24449572_21844665_21452313_23028356_23143596_22446963_24390342_17804836	Rheumatoid_arthritis	73	98	4	0.000797874	1	Acoxl Cdk6 Rel Stat4
Batf	27639821	Mortality_in_sepsis	5	759	3	0.000800316	1	Crispld2 Lpp Vps13a
Dzip1	28199695	Itch_intensity_from_mosquito_bite_adjusted_by_bite_size	73	43	3	0.000801051	1	Chn2 Dlc1 Ivd
Foxc1	29403010_27863252_22139419_25705162_23263863_26805783_21507922_20139978_24026423_29066854	Platelet_count	183	184	8	0.000801999	1	Asap1 Bcl2 Cass4 Itpk1 Lhfpl2 Paqr8 Pxn Rassf3
Stat1	26974007	Chronic_inflammatory_diseases_(ankylosing_spondylitis,_Crohn's_disease,_psoriasis,_primary_sclerosing_cholangitis,_ulcerative_colitis)_(pleiotropy)	93	280	7	0.000807265	1	Crem Dnmt3a Il10 Il18r1 Nfkb1 Nod2 Notch1
Zbed6	28158719_27863252_29403010_21738480_21738479_20139978_22037903_25096241	White_blood_cell_count	94	8	2	0.000809724	1	Atad2b Ssh2
Gtf2ird1	23259602_21940522_23064961	Dental_caries	26	28	2	0.000810538	1	Abcg2 Rps6ka2
Zfp831	28166213_29394082_24023788	Lung_function_(FEV1/FVC)	26	28	2	0.000810538	1	Sh3gl3 Tns1
Plagl1	28193307_29403010_27863252_23314186_25096241	Monocyte_count	92	136	5	0.000813523	1	Foxo1 Gpr35 Itga4 Rreb1 Tnfrsf1a
Myt1l	28282560	Carotid_plaque_burden	15	49	2	0.0008151	1	Atrnl1 Ptprn2
Vdr	23603761	Juvenile_idiopathic_arthritis_(oligoarticular_or_rheumatoid_factor-negative_polyarticular)	17	191	3	0.000816981	1	Il2ra Il2rb Prr5l
Zfp219	27386562_18941528_20453840_18997785_21654844_21244703_24076602_28445677_21833088_23412934_19010793_20598377_17660530_19525955_22457343_19525953_22190364	Multiple_sclerosis	102	185	6	0.000817664	1	Ankrd55 Asap1 Galc Rasgrp1 Stat4 Zfp36l1
Rreb1	27863252	Neutrophil_percentage_of_granulocytes	77	163	5	0.000819133	1	Bcl2l11 Ikzf3 Klf3 Rasgrp4 Zfp36l2
Klf5	26343387_29472232_29212778_21239051_29263402_24262325_26708285	Coronary_artery_disease	221	153	8	0.000821486	1	Ahdc1 Ccdc92 Ehbp1 Etv1 Fn1 Plce1 Qrich1 Zfp827
Creb1	24163127_21824976_19648920_20972438_25281661_27206850_21750109	Bladder_cancer	8	95	2	0.000826945	1	Clk3 Pag1
Creb1	26379185	Influenza_A_(H1N1)_infection	8	95	2	0.000826945	1	Atad2b L3mbtl3
Mnt	27015805	Parental_extreme_longevity_(95_years_and_older)	32	23	2	0.00082775	1	Gbp4 Gbp9
Arnt2	29064472_25387707	Anti-saccade_response	9	84	2	0.000829583	1	Plagl1 Sox6
Spib	29403010_22286170_27863252	Lymphocyte_counts	96	198	6	0.000846557	1	Arhgef3 Ccr7 Fam49b Ikbke Ptprc Scml4
Stat3	29494758_23273568_18204447_26502338_24871463_23053960_25862617_21044949_21408207_18204098_20169177_29848360_18204446_19165918_28714469_26606652_22291604_26663301_26316170_19838193_19838195_27399966	Systemic_lupus_erythematosus	147	479	12	0.000849783	1	5430427O19Rik Fcgr3 Ikbke Il10 Irf5 Lamc2 Lpp Notch2 Plcl1 Sbno2 Skap2 Zfp90
Rfx1	25811787	Urate_levels_in_overweight_individuals	12	63	2	0.000850893	1	Dlg2 Nid1
E2f1	27863252	Sum_eosinophil_basophil_counts	98	129	5	0.000853542	1	Apbb1ip Larp4b Nfatc2 Zc3h7b Zfp365
Sox4	27386562_18941528_20453840_18997785_21654844_21244703_24076602_28445677_21833088_23412934_19010793_20598377_17660530_19525955_22457343_19525953_22190364	Multiple_sclerosis	102	124	5	0.000855921	1	Chst12 Malt1 Rasgrp1 Rgs14 Vav2
Dlx3	22700719_28165464_18758461_21131588_23770605_24292274_26956414	Chronic_lymphocytic_leukemia	35	92	3	0.000855973	1	Arsb Bcl2l11 Fas
Ybx2	20195514_23704328	Primary_tooth_development_(time_to_first_tooth_eruption)	7	112	2	0.000863692	1	Igf2bp1 Msrb3
Ybx2	26174813	Attention_function_in_attention_deficit_hyperactive_disorder	7	112	2	0.000863692	1	Acoxl Dlg2
Nr4a2	29403010_22558069	Non-albumin_protein_levels	33	98	3	0.000864131	1	Acoxl Nfkb1 Traf3
Sox13	28166213_24023788	Lung_function_(FEV1)	24	136	3	0.000866288	1	Ablim3 Adrb2 Psd3
Scml4	28158719_27863252_29403010	White_blood_cell_count_(basophil)	42	18	2	0.000868606	1	Atp8b4 Pten
Jun	28632202	Borderline_personality_disorder	9	390	3	0.00087748	1	Gap43 Maml3 Snx9
Zfp511	24024966	Periodontitis_(CDC/AAP)	12	64	2	0.000878001	1	Actn2 Igf2r
Cic	27386562_18941528_20453840_18997785_21654844_21244703_24076602_28445677_21833088_23412934_19010793_20598377_17660530_19525955_22457343_19525953_22190364	Multiple_sclerosis	102	72	4	0.00087994	1	Il2ra Il7r Ildr1 Lpp
Tigd2	20139978	Hematological_and_biochemical_traits	13	59	2	0.000880417	1	Alpl Tmprss6
Tigd2	24823311_26584805	Plasma_omega-6_polyunsaturated_fatty_acid_levels_(linoleic_acid)	13	59	2	0.000880417	1	2900011O08Rik Fads2
Cebpb	29403010_23022100	Serum_total_protein_level	17	196	3	0.000880497	1	Bcl2 Ell2 Tbc1d16
Foxf2	27863252	Lymphocyte_percentage_of_white_cells	76	253	6	0.000882479	1	Cxcr2 Ehd4 Ets1 Ly9 Stxbp6 Traf3
Irf7	25884002	Neutrophil_count_in_HIV-infection	5	164	2	0.00088654	1	Ifi203 Ifi204
Zfp652	29403010_21900944	Aspartate_aminotransferase_levels	17	45	2	0.000887601	1	Akna Pnpla3
Ascl4	20596022_25608926	Alopecia_areata	17	45	2	0.000887601	1	Il13 Tnfrsf1a
Pou2af1	27863252	Plateletcrit	126	152	6	0.000888983	1	Arhgef3 Bcl2 Ets1 Fads2 P2ry2 Prdm16
Tef	25014791_21156761_20453842_21505073_20453841_19503088_17554300_28118524_18794853_24782177_23918589_24449572_21844665_21452313_23028356_23143596_22446963_24390342_17804836	Rheumatoid_arthritis	73	101	4	0.000893249	1	Arhgef3 Cd226 Prkch Stat4
Rel	28931804_24256812_24529757	Amyotrophic_lateral_sclerosis_(sporadic)	42	177	4	0.000893814	1	Abcg1 Anxa3 Inpp4b Unc13a
Atf3	26974007	Chronic_inflammatory_diseases_(ankylosing_spondylitis,_Crohn's_disease,_psoriasis,_primary_sclerosing_cholangitis,_ulcerative_colitis)_(pleiotropy)	93	285	7	0.00089527	1	Ankrd55 Antxr2 Bank1 Crem Fndc3a Il23r Ubash3a
Irf4	27863252	High_light_scatter_reticulocyte_count	112	822	14	0.000897996	1	Atxn1 Bcl2 Bcl2l11 Bmp7 Fam46c Hbs1l Riok3 S1pr2 Sema4d Sept9 Specc1 Thrb Tmcc2 Tns1
Tbx21	25117820	Response_to_chemotherapy_in_breast_cancer_hypertensive_cases_(cumulative_dose)_(bevacizumab)	6	135	2	0.000898312	1	Gramd1b Sv2c
Rfx7	27863252	Sum_basophil_neutrophil_counts	64	51	3	0.000900503	1	Acvr1b Pnkd Rreb1
Rfx2	27650483_26631737	Urinary_albumin-to-creatinine_ratio	11	71	2	0.000901844	1	Arhgap33 Thbs3
Foxo3	29403010_19198610_27863252	Eosinophil_counts	104	185	6	0.000905274	1	Apbb1ip Auh Bcl2a1d Brd3 Foxo1 Zfpm1
Zfp219	29403010_19198610_27863252	Eosinophil_counts	104	185	6	0.000905274	1	Ankrd33b Ikzf3 Kdm6b Klf3 Spsb1 Trerf1
Ankzf1	27005778	Metabolite_levels_(small_molecules_and_protein_measures)	22	35	2	0.000905569	1	Gls2 Ndrg2
Six5	27863252	Sum_eosinophil_basophil_counts	98	271	7	0.000910294	1	Apbb1ip Brd3 Dock3 Exoc2 Glcci1 Il4ra Kdm6b
Tead1	27089181	Positive_affect	12	288	3	0.000913435	1	Maml3 Rtkn2 Sema6d
Zfp64	24351856_20383146_22479191_26420894_26831199	Chronic_kidney_disease	25	31	2	0.000918861	1	Shroom3 Ube2q2
Nfkb2	26301688	Pediatric_autoimmune_diseases	17	199	3	0.000920076	1	Ankrd55 Il2ra Tnfsf15
Stat4	21383967	Celiac_disease_or_Rheumatoid_arthritis	13	265	3	0.000922086	1	Ifi204 Ifi205 Ptpn2
Zfp513	28604730	Lung_cancer_in_ever_smokers	41	19	2	0.000923744	1	Mboat2 Trim26
Smad4	29615537_29403010_28548082_28334899	Total_cholesterol_levels	54	61	3	0.000925291	1	Igf2r Trps1 Ubash3b
Gata2	26343387_29472232_29212778_21239051_29263402_24262325_26708285	Coronary_artery_disease	221	194	9	0.000926484	1	Arhgap26 Eml1 Fn1 Furin Hsf2bp Qrich1 Scml4 Slc22a3 Thada
Irf4	27863252	Lymphocyte_percentage_of_white_cells	76	822	11	0.000926864	1	Acoxl Antxr2 Dnmt3a H2-Ab1 Ifitm2 Il1rn Ly9 Mxd3 Nfkb1 Stxbp6 Zfp831
Otx1	20596022_25608926	Alopecia_areata	17	46	2	0.000927407	1	Ctla4 Lpp
Crem	23740937	Systemic_lupus_erythematosus_and_Systemic_sclerosis	12	66	2	0.000933459	1	Lamc2 Stat4
Satb1	27863252	Lymphocyte_percentage_of_white_cells	76	256	6	0.00093801	1	Dnmt3a Dnmt3b H2-Ab1 Icam5 Itpka Rbpms
Stat3	25014791_21156761_20453842_21505073_20453841_19503088_17554300_28118524_18794853_24782177_23918589_24449572_21844665_21452313_23028356_23143596_22446963_24390342_17804836	Rheumatoid_arthritis	73	479	8	0.000938339	1	Arhgef3 Cd226 Irf5 Ptpn2 Rel Smtnl2 Tec Ubash3a
Irf4	29403010_21900944	Aspartate_aminotransferase_levels	17	822	5	0.000941511	1	Akna Cacnb2 Csf1 Pnpla3 Zfp827
Pou6f1	27863252	Sum_eosinophil_basophil_counts	98	132	5	0.000946477	1	Apbb1ip Auh Bcl2 Pten Zfpm1
Six5	26965516_28960316_29471430_23263487_29228715_21242260_18372901_27145994_26151821_23266556_23350875_27207650_22634755_17618284_17618283_17934461_25105248_19011631_24836286_24448986_20972440_28295283_24737748_18372905_25990418_21761138	Colorectal_cancer	72	271	6	0.000946722	1	Dock3 Erap1 Fads2 Lama5 Lamc1 Nxn
Erg	27989323	Interleukin-17_levels	13	268	3	0.000952626	1	Epm2a Ikzf2 Klf7
Erg	25014791_21156761_20453842_21505073_20453841_19503088_17554300_28118524_18794853_24782177_23918589_24449572_21844665_21452313_23028356_23143596_22446963_24390342_17804836	Rheumatoid_arthritis	73	268	6	0.00096126	1	Ankrd55 Gata3 Nfkbie Rasgrp1 Rtkn2 Ubash3a
Foxn2	25245031_24159190	Symmetrical_dimethylarginine_levels	12	67	2	0.000961808	1	Nucks1 Slc25a45
Elk4	29531354_17434096_26089329_22306652_19369658	Stroke	21	38	2	0.000971771	1	Cdk6 Impa2
Msx2	24665060	Smoking_initiation	13	62	2	0.000971795	1	Acot12 Sbf2
Srebf1	24097068_27036123_26780889_26582766_19060911_28270201_25961943_20686565_24886709	Cholesterol,_total	66	198	5	0.000971802	1	Dock7 Fads2 Hmgcr Pparg Tom1
Prdm1	27863252	Reticulocyte_fraction_of_red_cells	106	184	6	0.000972302	1	Bzw2 Ehd3 Fam46c Riok3 S1pr2 Sema4d
Rxra	24405752_28898252_20849430_22290723_28887542_29621232_20858683_24244560_19096518_29170429_24647736	Glycated_hemoglobin_levels	35	381	5	0.00097523	1	Adcy5 Ank1 Cdh3 Smg5 Tmc6
Zfp524	24159190	Serum_dimethylarginine_levels_(asymmetric/symetric_ratio)	11	74	2	0.000979208	1	Tcf7l2 Zcchc24
Mitf	28470677	Survival_in_pancreatic_cancer	15	54	2	0.00098935	1	Il17f Zfp608
Trp53	21107309	Response_to_antipsychotic_treatment_in_schizophrenia_(reasoning)	8	104	2	0.000989886	1	Hunk Pid1
Cebpg	28158719_27863252_29403010	White_blood_cell_count_(basophil)	42	182	4	0.00099135	1	Apbb1ip Fam53b Helb P2ry2
Rarg	27386562_18941528_20453840_18997785_21654844_21244703_24076602_28445677_21833088_23412934_19010793_20598377_17660530_19525955_22457343_19525953_22190364	Multiple_sclerosis	102	192	6	0.000991377	1	Batf Ildr1 Ncoa2 Rgs14 Traf3 Vav2
Tcf7l2	29292387	Depressive_symptoms_(MTAG)	22	156	3	0.000992661	1	Celf4 Maml3 Vrk2
Pou2f2	27863252	Platelet_distribution_width	101	194	6	0.000993515	1	Cd226 Iqgap2 St7l Tlk1 Txk Zcwpw1
Cebpg	27846195	Response_to_paliperidone_in_schizophrenia_(PANSS_score)	19	182	3	0.000996394	1	Adck1 Prlr Psd3
Bhlhe40	26053186	3-hydroxy-1-methylpropylmercapturic_acid_levels_in_smokers	75	175	5	0.000999523	1	Anxa2 Nhsl2 Runx2 Tg Tnk2
Erg	27680694_20372150_23202124	Birth_weight	29	268	4	0.00100673	1	Adcy5 Igf2bp3 L3mbtl3 Nrip1
E4f1	21297633_24837172_26192919_28067908_23511034_19122664_19915572_20848476_25082827_23128233_20228798_20228799_19915573_28008999	Ulcerative_colitis	85	40	3	0.00100812	1	Nfkb1 Procr Ptprc
Trp73	24262325_27997041	Large_artery_stroke	5	175	2	0.00100855	1	Hdac9 Tmem163
Xbp1	23449627	Pubertal_anthropometrics	8	105	2	0.00100887	1	Dnajc27 Nucks1
Lyl1	28927378	Caudate_activity_during_reward	8	105	2	0.00100887	1	Chl1 Col5a3
Sox5	29403010_22286170_27863252	Lymphocyte_counts	96	137	5	0.00101894	1	Klf3 Rap1gap2 Slc35d1 Tnfrsf1a Zfp831
Lin28b	28928442	Yeast_infection	20	41	2	0.00102483	1	Gpr161 Tln2
Zic2	26426971	Waist-to-hip_ratio_adjusted_for_BMI_x_sex_x_age_interaction_(4df_test)	33	104	3	0.00102656	1	Bcl2 Itgb8 Rfx7
Zic2	29403010_22558069	Non-albumin_protein_levels	33	104	3	0.00102656	1	Bcl2 Fads2 Reps1
Smad3	27089181	Positive_affect	12	300	3	0.00102799	1	Acvr1b Sema6d Stk4
Smad3	23740937	Systemic_lupus_erythematosus_and_Systemic_sclerosis	12	300	3	0.00102799	1	Ikzf3 Samd9l Stat4
Pou3f1	27989323	Macrophage_inflammatory_protein_1a_levels	8	106	2	0.00102803	1	Zfp365 Zfp36l1
Rel	20585324	Conduct_disorder	5	177	2	0.00103156	1	Arhgap22 Rnf150
Pparg	20351715	Bipolar_disorder_or_major_depressive_disorder_(combined)	5	177	2	0.00103156	1	Cacna1c Syne1
Maff	27650483_26631737	Urinary_albumin-to-creatinine_ratio	11	76	2	0.00103251	1	Casz1 Celf2
Sp4	27863252	Lymphocyte_percentage_of_white_cells	76	582	9	0.00103361	1	Cdk6 Chd7 Dnmt3b Ebf1 Ets1 Mxd3 Nfkb1 Plaur Rbpms
Tsc22d1	28540026	Autism_spectrum_disorder_or_schizophrenia	64	13	2	0.00103515	1	Gigyf2 Trim26
Ikzf3	27846195	Response_to_paliperidone_in_schizophrenia_(positive_Marder_score)	16	221	3	0.00103527	1	Adck1 Cacna1s Pomt2
Zfp148	23817569	Self-reported_allergy	12	301	3	0.00103793	1	Il2ra Lpp Nfatc2
Tcf7l1	27629369	Loneliness	7	123	2	0.00104029	1	Hdac9 Syde1
Tcf7l1	28443625	Waist-to-hip_ratio_adjusted_for_BMI_(joint_analysis_main_effects_and_smoking_interaction)	7	123	2	0.00104029	1	Ccdc92 Klf13
Irf1	25884002	Neutrophil_count_in_HIV-infection	5	178	2	0.00104316	1	Ifi203 Ifi204
Tcf4	27863252	Sum_eosinophil_basophil_counts	98	135	5	0.00104674	1	Bcl2 Klf3 Nfkb1 Spsb1 Zfp365
Fos	29403010_24094242	Serum_alkaline_phosphatase_levels	28	124	3	0.00104989	1	Ece1 Phldb1 Trim12c
Nfatc4	29403010_22286170_27863252	Lymphocyte_counts	96	138	5	0.00105264	1	Antxr2 Arhgef3 Ikzf3 Il2ra Rap1gap2
Srebf2	27863252	Immature_fraction_of_reticulocytes	73	182	5	0.00105372	1	Bsn Bzw2 S1pr2 Tln2 Tns1
Ppard	26068415	Amino_acid_levels	7	124	2	0.00105714	1	Prodh Psph
Ar	28115739	Methadone_dose_in_opioid_dependence	7	124	2	0.00105714	1	Chn2 Lsp1
Epas1	26634245	Post_bronchodilator_FEV1/FVC_ratio	171	116	6	0.00106432	1	Arnt2 Cacna1c Itga7 Kcnc2 Mctp1 Pparg
Gata3	29875488_28240269	Blood_protein_levels	620	150	14	0.0010663	1	Arhgef3 Ccrl2 Ctsb Cxcl5 Fn1 Ifnar1 Il18r1 Il1rap Kdelc2 Nrp1 Pde4a Pigr Sell Sirpa
Nfe2	27089181	Positive_affect	12	304	3	0.00106811	1	Acvr1b Cacna2d1 Stk4
Zfp64	26831199	Glomerular_filtration_rate_in_non_diabetics_(creatinine)	27	31	2	0.00107266	1	Shroom3 Ube2q2
Zfp641	18758464_26192919_28067908_17068223_27569725_23128233_28008999	Inflammatory_bowel_disease	130	27	3	0.0010803	1	Bsn Grid2ip Litaf
Stat1	21383967	Celiac_disease_or_Rheumatoid_arthritis	13	280	3	0.00108123	1	Ifi203 Ifi204 Ifi205
Six3	29255261_27089181_23229837_27918536_20634892_25993607_29292387_17667963_18762592_27067015	Neuroticism	103	34	3	0.00109011	1	Dcc Ncam1 Sorcs2
Srebf2	28441456	Facial_morphology_(factor_12,_vertical_position_of_sublabial_sulcus_relative_to_central_midface)	5	182	2	0.00109019	1	Hdac9 Nfatc1
Tef	27863252	Neutrophil_percentage_of_granulocytes	77	101	4	0.0010909	1	Bcl2l11 Pten Spsb1 Tnfsf8
Foxh1	24554482	Response_to_anti-retroviral_therapy_(ddI/d4T)_in_HIV-1_infection_(Grade_3_peripheral_neuropathy)	7	126	2	0.00109123	1	Hdac9 Litaf
Klf2	27863252	Eosinophil_percentage_of_white_cells	88	152	5	0.00109595	1	Bcl2l11 Kdm6b Pten Tnfsf8 Zfpm1
Stat4	28584286	Cognitive_empathy	30	265	4	0.0011007	1	Atxn1 Dysf Mylk Shroom3
Ets1	27863252	Monocyte_percentage_of_white_cells	93	383	8	0.00110075	1	Bcl2 Bcl2a1b Chd7 Eif4e3 Gcnt2 Nfkbie Sh2d3c Slc9a3r1
Foxp3	17558408_20190752_18311140_22057235_24999842_23936387	Celiac_disease	32	110	3	0.00110251	1	Ccr3 Ptpn2 Stat4
Foxp3	27021288_26184070	Oppositional_defiant_disorder_dimensions_in_attention-deficit_hyperactivity_disorder	8	110	2	0.00110644	1	Adam12 Sox5
Gata3	24920014_29196614_24149102_21037568_22286212	Hodgkin's_lymphoma	6	150	2	0.00110727	1	Gata3 Il13
Rxra	29617998_24518671_25637523_22570627_29235454_24002674_28073927_25173106	Intraocular_pressure	116	381	9	0.00110777	1	Ahrr Fbn2 Lin28b Lmo7 Ltbp1 Pkhd1 Ralb Stox2 Wnt9b
Hdx	27989323	Interleukin-9_levels	10	87	2	0.00110827	1	Lmo7 Nrp2
Scrt1	27989323	Interleukin-7_levels	7	127	2	0.00110848	1	Atp6v0d2 Paqr8
Zfp628	27629089	Multiple_system_atrophy	12	72	2	0.00110973	1	Fbn2 Wnt3
Prdm1	22832960	Temperament	5	184	2	0.00111409	1	Fbn2 Msrb3
Prdm1	20081857	Two-hour_glucose_challenge	5	184	2	0.00111409	1	Gipr Tcf7l2
Foxc1	24262325_27997041	Large_artery_stroke	5	184	2	0.00111409	1	Hdac9 Tmem163
Zkscan1	28193307_29403010_27863252_23314186_25096241	Monocyte_count	92	85	4	0.0011146	1	Cdk6 Csf1 Ehd4 Slc2a1
Elf1	27863252	Granulocyte_percentage_of_myeloid_white_cells	90	306	7	0.00111463	1	Brd3 Eif4e3 Itga4 Plaur Sh2d3c Tbc1d14 Thada
Foxo3	23319000	Metabolite_levels_(HVA-5-HIAA_Factor_score)	5	185	2	0.00112614	1	Kif13b Vgll4
Nfe2l2	23006423	Response_to_taxane_treatment_(docetaxel)	5	185	2	0.00112614	1	Cacna2d1 Slc6a6
Rreb1	27846195	Response_to_paliperidone_in_schizophrenia_(negative_Marder_score)	22	163	3	0.00112677	1	Ccdc122 Fap Zfp362
Mafg	22504421_25625606_21116278_28098162	Hippocampal_volume	9	98	2	0.00112681	1	Dpp4 Msrb3
Smad3	28193307_29403010_27863252_23314186_25096241	Monocyte_count	92	300	7	0.00113134	1	Acvrl1 Ankrd55 Foxo1 Ssbp4 Tbc1d14 Treml2 Trps1
Plagl1	27863252	High_light_scatter_reticulocyte_percentage_of_red_cells	99	136	5	0.00113226	1	Ehd3 Itga4 S1pr2 Tmc6 Tmcc2
Pou2af1	29109912	Iris_color_(L*_coordinate)	6	152	2	0.00113674	1	Scml4 Vdac1
Prrx1	18521091	Response_to_iloperidone_treatment_(QT_prolongation)	6	152	2	0.00113674	1	Palld Slco3a1
Nr1i3	23307926_19448619_22267201_26414677_24045676_29773799	Menopause_(age_at_onset)	51	17	2	0.00113915	1	Grip1 Helb
Hbp1	28441456	Facial_morphology_(factor_15,_philtrum_width)	12	73	2	0.00114055	1	Lonp2 Napb
Thap1	29403010_22286170_27863252	Lymphocyte_counts	96	82	4	0.00114216	1	Ets1 Ikzf3 Jazf1 S1pr1
Irf7	20150558_27989323	Interleukin-18_levels	22	164	3	0.00114682	1	Bco2 Il18 Xdh
Klf5	25129146	Esophageal_squamous_cell_carcinoma	6	153	2	0.00115161	1	Atp1b2 Plce1
Rxra	25245031_24159190	Asymmetrical_dimethylarginine_levels	10	381	3	0.00115214	1	Cdh3 Ddah1 Zfp536
Rxra	22581228	Fasting_blood_insulin_(BMI_interaction)	10	381	3	0.00115214	1	Pparg Sulf1 Syn2
Nr2f6	22197929_26028593_25305756	IgA_nephropathy	10	89	2	0.0011594	1	Mpdu1 Vav3
Nfe2	23382691	IgG_glycosylation	146	304	9	0.00116644	1	Angpt1 Fmnl2 Hunk Itga11 Mdga2 Mtss1 Nsmaf Ryr2 Trim12c
Ddit3	22961000	Primary_biliary_cirrhosis	13	68	2	0.00116769	1	Stat4 Syngr1
Nhlh1	28360221	Blood_osmolality_(transformed_sodium)	11	81	2	0.00117175	1	Nav2 Nfat5
Thap2	19448622_19448623_23667675_23599027_27182965_21102462_25231870_29773799	Menarche_(age_at_onset)	74	12	2	0.00117178	1	Cadm1 Nfat5
Tead1	28928442	Bacterial_meningitis	13	288	3	0.00117281	1	Col23a1 Inpp4b Slc6a9
Foxo1	27863252	Neutrophil_percentage_of_granulocytes	77	103	4	0.00117337	1	Apbb1ip Ikzf3 Runx1 Zfp365
Batf3	27863252	Reticulocyte_count	97	37	3	0.00117519	1	Bcl2 Riok3 Tmprss6
Gli3	18835860_24429156_29066090	Idiopathic_pulmonary_fibrosis	7	131	2	0.00117877	1	Mdga2 Tert
Sp4	26974007	Chronic_inflammatory_diseases_(ankylosing_spondylitis,_Crohn's_disease,_psoriasis,_primary_sclerosing_cholangitis,_ulcerative_colitis)_(pleiotropy)	93	582	10	0.00118104	1	Crem Erap1 Ets1 Fndc3a Il18r1 Nfkb1 Notch1 Ptpn2 Tnfrsf1a Zpbp2
Tcf4	27863252	Neutrophil_percentage_of_white_cells	59	135	4	0.00118216	1	Nfkb1 Slc35d1 Tert Zfp36l2
Rel	27863252	Neutrophil_percentage_of_granulocytes	77	177	5	0.00118408	1	Bcl2a1b Bcl2a1d Cxcl1 Nfkb1 Rad52
Meis1	27863252	Eosinophil_percentage_of_granulocytes	82	97	4	0.00118701	1	Lpp Pten Tnfsf8 Zc3h7b
Cebpb	25673412_26785701_28448500_28270201_28430825_27195708	Waist-to-hip_ratio_adjusted_for_body_mass_index	41	196	4	0.00119037	1	Bcl2 Klf13 Nid2 Smad6
Nfkb2	27386562_18941528_20453840_18997785_21654844_21244703_24076602_28445677_21833088_23412934_19010793_20598377_17660530_19525955_22457343_19525953_22190364	Multiple_sclerosis	102	199	6	0.00119221	1	Ankrd55 Ets1 Il2ra Plekhg5 Vav2 Zbtb46
Pou2af1	23143596	Rheumatoid_arthritis_(ACPA-positive)	24	152	3	0.00119466	1	D1Ertd622e Gata3 Irf5
Gabpa	29535710	IgG_glycosylation_patterns	7	132	2	0.00119667	1	B4galt1 Fut8
Pou6f1	27790247	Age-related_diseases_and_mortality	7	132	2	0.00119667	1	Tcf7l2 Zfhx3
Vdr	23319000	Metabolite_levels_(5-HIAA/_MHPG_Ratio)	5	191	2	0.00119973	1	Adam12 Ccnd3
Maf	27989323	Hepatocyte_growth_factor_levels	14	613	4	0.0012015	1	Atxn1 Cacna2d1 Ldlrap1 Serpine2
Zfp367	27046643_21130836_25869804	Information_processing_speed	13	69	2	0.00120203	1	Atrnl1 Pknox1
Arntl2	28701861	Fear_of_minor_pain	8	115	2	0.00120838	1	Mab21l3 Naglu
Batf3	27863252	Sum_eosinophil_basophil_counts	98	37	3	0.00121051	1	Bcl2 Glcci1 Runx1
Sp4	29403010_27863252_28017375_23263863_28453575_19862010_20139978	Mean_corpuscular_volume	180	582	15	0.00121189	1	Atp11a Bcl2 Cdk6 Fam46c Foxo1 Hsf2bp Mpp1 Ppp1r10 Rbpms Rcl1 Tbx6 Tmc6 Tmcc2 Tyms Zmat3
Pou2af1	29403010_27863252_22139419_25705162_23263863_26805783_21507922_20139978_24026423_29066854	Platelet_count	183	152	7	0.00121777	1	Arhgef3 Bcl2 Ehd4 Ets1 Fads2 Ldlrap1 Rbms2
Sox21	23259602_21940522_23064961	Dental_caries	26	141	3	0.00122074	1	Abcg2 Exoc2 Maf
Zfp148	27863252	Monocyte_percentage_of_white_cells	93	301	7	0.00122887	1	Bcl2 Bcl2a1d Ccnd3 Chd7 Kdm6b Lpp Slc9a3r1
Tcf7l2	27863252	Eosinophil_percentage_of_white_cells	88	156	5	0.00123033	1	Asb2 Bcl2a1b Il4ra Pparg Pten
Pou2f2	23319000	Metabolite_levels_(HVA-5-HIAA_Factor_score)	5	194	2	0.00123738	1	Kif13b Ncoa2
Nr2f1	25130324	Heschl's_gyrus_morphology	10	92	2	0.00123818	1	Cd28 Tnfaip8
Zbtb1	27863252	Hemoglobin_concentration	65	124	4	0.00124018	1	Egln1 Rgs14 Sbf2 Zfp641
Satb1	20852631_22452962_20585626_22951594_19330030_23535733_17903305_25751625_25327703_24143190_25038754_17529967_29059683_21908515_27117709_23354978_28171663_29058716_23468962_18326623_21424380_22383897_23535729_20872241_19330027_20453838_25956309_22976474_27354352_21263130_17529974_17529973_25824743_22037553	Breast_cancer	286	256	12	0.00124082	1	Bcas1 Bcl2 Bcl2l11 Ccdc134 Gpr161 Lsp1 Nrip1 Smad3 Tert Tns1 Zc3h7b Zfp704
Sox15	29304378	Total_body_bone_mineral_density	57	64	3	0.00124532	1	Plcl1 Sox6 Tcf7l1
Batf	21297633_24837172_26192919_28067908_23511034_19122664_19915572_20848476_25082827_23128233_20228798_20228799_19915573_28008999	Ulcerative_colitis	85	759	11	0.0012468	1	Cd28 Cyth1 Fcgr3 Hormad2 Plcl1 Ptpn2 Rgs14 Rorc Sema6d Tnfsf15 Zfp90
Batf	27863252	Sum_eosinophil_basophil_counts	98	759	12	0.00124772	1	Asb2 Auh Bcl2l11 Cd200r1 Ikzf2 Klf3 Lpp Pten Rasgrp4 Spsb1 Tbx6 Zfp365
Hmga2	27863252	Granulocyte_percentage_of_myeloid_white_cells	90	153	5	0.00124814	1	Ank1 Bcl2a1a Cdk6 Cxcl5 Lsp1
Myb	21738478	White_blood_cell_types	7	135	2	0.00125117	1	Cdk6 Itga4
Sox13	19182806_27797806_22764253	Essential_tremor	7	136	2	0.0012696	1	Lingo1 Slc1a2
Nkx3-1	27082954	Peripheral_arterial_disease_(traffic-related_air_pollution_interaction)	61	228	5	0.00127377	1	Abca1 Got1 Maf Nav2 Tnik
Foxp1	23603761	Juvenile_idiopathic_arthritis_(oligoarticular_or_rheumatoid_factor-negative_polyarticular)	17	54	2	0.0012763	1	Il2ra Zfp36l1
Nfat5	27863252	Sum_basophil_neutrophil_counts	64	127	4	0.00127859	1	Ccdc125 Ehd4 Il1rn Stxbp6
Nfe2l2	26053186	3-hydroxy-1-methylpropylmercapturic_acid_levels_in_smokers	75	185	5	0.00128001	1	Cacna2d1 Chd7 Gfra1 Lama5 Tnk2
Zbtb7b	27863252	Hemoglobin_concentration	65	214	5	0.00128152	1	Atp2b4 Hk1 Rgs14 Shroom3 Vav2
Zfp281	27171184_26434682	Coronary_artery_aneurysm_in_Kawasaki_disease	16	238	3	0.00128185	1	Grk5 Nav2 Zfp618
Spib	29403010_27863252_22139419_25705162_23263863_26805783_21507922_20139978_24026423_29066854	Platelet_count	183	198	8	0.00128623	1	Arhgef3 Cass4 Dnm3 Ehd3 Iqgap2 Tert Tesk2 Trim12c
Sox5	26174813	Attention_function_in_attention_deficit_hyperactive_disorder	7	137	2	0.00128815	1	Dlg2 Zfp831
Spib	23319000	Metabolite_levels_(HVA-5-HIAA_Factor_score)	5	198	2	0.00128846	1	Kif13b Vgll4
Srebf1	22797727	Renal_function-related_traits_(eGRFcrea)	5	198	2	0.00128846	1	Rgs14 Shroom3
Sall3	26708676_27997041_24262325_26732560_26089329_29531354	Ischemic_stroke	27	34	2	0.00129036	1	Cdk6 Zfhx3
Nfic	26390057_29403010_28135244_27618447_28739976_28498854	Pulse_pressure	77	48	3	0.0012904	1	Cdk6 Fbn1 Tcf7l1
Mga	27863252	Neutrophil_percentage_of_granulocytes	77	48	3	0.0012904	1	Bcl2l11 Klf3 Tnfsf8
E4f1	29403010_28887542	Alanine_transaminase_levels	23	40	2	0.00129327	1	Akna Shroom3
Foxb1	22138694_21743469_20062062_23749187	Ankylosing_spondylitis	22	171	3	0.00129349	1	Erap1 Il23r Tnfrsf1a
Prdm1	27863252	High_light_scatter_reticulocyte_count	112	184	6	0.00129369	1	Bzw2 Ehd3 Fam46c Riok3 S1pr2 Sema4d
Pou2f2	22139419_27863252_19221038_22423221_19110211_24026423_19820697	Mean_platelet_volume	145	194	7	0.00129813	1	Asap1 Bank1 Cd226 Iqgap2 St7l Tcf12 Trim12c
Nfe2	26974007	Chronic_inflammatory_diseases_(ankylosing_spondylitis,_Crohn's_disease,_psoriasis,_primary_sclerosing_cholangitis,_ulcerative_colitis)_(pleiotropy)	93	304	7	0.00130105	1	Antxr2 Bsn Cd226 Fndc3a Ifngr2 Il2ra Prdm1
Nfkb2	24823311	Plasma_omega-6_polyunsaturated_fatty_acid_levels_(adrenic_acid)	5	199	2	0.00130139	1	Reep3 Slc1a2
Nfkb2	23319000	Metabolite_levels_(HVA-5-HIAA_Factor_score)	5	199	2	0.00130139	1	Kif13b Vgll4
Nfkb2	20585324	Conduct_disorder	5	199	2	0.00130139	1	Arhgap22 Rnf150
Klf7	27639821	Mortality_in_sepsis	5	199	2	0.00130139	1	Crispld2 Lpp
Ar	26390057_29403010_28135244_27618447_28739976_29212154_29615537_25249183_28498854_19430483_29208002_21909115_19430479_26969751	Systolic_blood_pressure	112	124	5	0.00130211	1	Enpep Fes Itpr1 Lsp1 Zfp831
Sox4	27863252	High_light_scatter_reticulocyte_count	112	124	5	0.00130211	1	Bzw2 Ccnd3 Fam46c Specc1 Stx7
Irf4	25648963	Verbal_declarative_memory	11	822	4	0.00130411	1	Atp8b4 Pmepa1 Ptger3 Rin2
Etv5	25673412	Hip_circumference_adjusted_for_BMI	53	70	3	0.00130675	1	Cenpw L3mbtl3 Pparg
Nfatc4	24554482	Response_to_anti-retroviral_therapy_(ddI/d4T)_in_HIV-1_infection_(Grade_3_peripheral_neuropathy)	7	138	2	0.00130684	1	Hdac9 Il2ra
Nfatc4	26174813	Attention_function_in_attention_deficit_hyperactive_disorder	7	138	2	0.00130684	1	Dlg2 Sorcs2
Elk4	27863252	Sum_eosinophil_basophil_counts	98	38	3	0.00130887	1	Cdk6 Kdm6b Larp4b
Eea1	17658951_22013104_23251661	Obesity-related_traits	351	24	4	0.00131075	1	Ece1 Otud7b Slc29a3 Vsig10
Smad3	21383967	Celiac_disease_or_Rheumatoid_arthritis	13	300	3	0.00131921	1	Mndal Stat4 Ubash3a
Smad3	23897914	Bronchopulmonary_dysplasia	13	300	3	0.00131921	1	Klf12 Plxdc2 Tnk2
Ahrr	28193307_29403010_27863252_23314186_25096241	Monocyte_count	92	89	4	0.00132243	1	Ccr3 Gcnt2 Ssbp4 Treml2
Lhx6	24823311_26584805	Plasma_omega-6_polyunsaturated_fatty_acid_levels_(gamma-linolenic_acid)	7	139	2	0.00132566	1	Maml3 Serpinb1a
Stat3	27863252	Neutrophil_percentage_of_granulocytes	77	479	8	0.00133366	1	Asb2 Chd7 Cog6 Klf3 Lpp Pten Runx1 Spsb1
Zfp618	28441456	Facial_morphology_(factor_15,_philtrum_width)	12	79	2	0.00133405	1	Napb Rab33a
Zfp281	22700719_28165464_18758461_21131588_23770605_24292274_26956414	Chronic_lymphocytic_leukemia	35	238	4	0.00133576	1	Acoxl Bcl2l11 Csrnp1 Fas
Zbtb33	27989323	Granulocyte-colony_stimulating_factor_levels	8	121	2	0.00133648	1	Ankrd13c Vgll4
Foxf2	26390057_29403010_28135244_27618447_28739976_29212154_29615537_25249183_28498854_19430483_29208002_21909115_19430479_26969751	Systolic_blood_pressure	112	253	7	0.00133843	1	Acox1 Cacnb2 Itpr1 Lsp1 Nucb2 Slc39a8 Zfp318
Srebf2	26390057_29403010_28135244_27618447_28739976_28498854	Pulse_pressure	77	182	5	0.00133982	1	Cep68 Esr1 Gata2 S1pr2 Tln2
Hmga1	29221444	Coronary_artery_calcified_atherosclerotic_plaque_(90_or_130_HU_threshold)_in_type_2_diabetes	26	36	2	0.0013409	1	Cntln Psd3
Ets2	27989323	Interferon_gamma_levels	9	107	2	0.00134116	1	Cysltr2 Palld
Zeb1	27863252	Eosinophil_percentage_of_granulocytes	82	171	5	0.00134756	1	Bcl2a1d Cog6 Dock3 Lpp Smad3
Tcf7l2	25673412	Hip_circumference_adjusted_for_BMI	53	156	4	0.00134911	1	Adamtsl3 L3mbtl3 Plag1 Pparg
Nr3c2	27989323	Interleukin-2_levels	11	87	2	0.00135011	1	Ebf1 Lekr1
Egr4	29403010_22286170_27863252	Lymphocyte_counts	96	146	5	0.00135281	1	Dnmt3a Ets1 L3mbtl3 Nfkbia Slc35d1
Sox4	22293688_18587394_17554261_28067908_26891255_23850713_22412388_17554300_26192919_20570966_17684544_23266558_17435756_22936669_23128233_17804789_21102463_17447842_28008999	Crohn's_disease	113	124	5	0.00135464	1	Ccnd3 Crem Jak2 Rasgrp1 Rgs14
Thra	27790247	Age-related_diseases,_mortality_and_associated_endophenotypes	24	159	3	0.00135991	1	Bcl3 Itpk1 Tcf7l2
Nkx3-1	29403010_21900944	Aspartate_aminotransferase_levels	17	228	3	0.0013621	1	Akna B4galt1 Cacnb2
Nkx3-1	23603761	Juvenile_idiopathic_arthritis_(oligoarticular_or_rheumatoid_factor-negative_polyarticular)	17	228	3	0.0013621	1	Ankrd55 Ccr3 Fas
Hmx2	28193307_29403010_27863252_23314186_25096241	Monocyte_count	92	41	3	0.00136223	1	Bcl2l11 Ccr3 Tnfrsf1a
Fosl2	27863252	Monocyte_percentage_of_white_cells	93	492	9	0.00136392	1	Bcl2a1d Chd7 Cxcr2 Eif4e3 Lpp Lsp1 Pik3ap1 S1pr3 Slc9a3r1
Tbx21	29403010_19198610_27863252	Eosinophil_counts	104	135	5	0.00136544	1	Ankrd33b Bcl2a1b Bcl2l11 Gata3 Rasgrp4
Tcf4	29403010_19198610_27863252	Eosinophil_counts	104	135	5	0.00136544	1	Bcl2 Klf3 Nfkb1 Spsb1 Zfp365
Zfp641	28443625	Waist_circumference_adjusted_for_BMI_in_non-smokers	35	27	2	0.00136724	1	Adamtsl3 Lin28b
Foxp2	25245031_24159190	Asymmetrical_dimethylarginine_levels	10	97	2	0.00137507	1	Cacna2d1 Ddah1
Meis1	23612905_21900946_22922229_21841780	Graves'_disease	10	97	2	0.00137507	1	Lpp Prickle1
Insm1	27863252	Eosinophil_percentage_of_white_cells	88	43	3	0.00137701	1	Bcl3 Exoc2 Trerf1
Tef	27863252	Eosinophil_percentage_of_granulocytes	82	101	4	0.00137877	1	Bcl2l11 Pten Spsb1 Tnfsf8
Etv5	29198719	Lobe_attachment_(rater-scored_or_self-reported)	54	70	3	0.00137961	1	Atp8b4 Nrp1 Tnip3
Tcf7l1	28443625	Waist-to-hip_ratio_adjusted_for_BMI_in_non-smokers	8	123	2	0.00138057	1	Ccdc92 Klf13
Tcf7l1	28644415	Western_dietary_pattern	8	123	2	0.00138057	1	Eea1 Kcnq5
Etv2	21383967	Celiac_disease_or_Rheumatoid_arthritis	13	74	2	0.00138098	1	Ifi203 Ifi205
Stat1	27386562_18941528_20453840_18997785_21654844_21244703_24076602_28445677_21833088_23412934_19010793_20598377_17660530_19525955_22457343_19525953_22190364	Multiple_sclerosis	102	280	7	0.00139063	1	Batf Cd86 Chst12 Il7r Ildr1 Lpp Zbtb46
Maf	27863252	Reticulocyte_fraction_of_red_cells	106	613	11	0.0013954	1	Arhgef3 Atp11a Atxn1 Bmp7 Dnaja4 Rimklb S1pr2 Smox Stx7 Tmc6 Zfpm1
Pou2f2	25014791_21156761_20453842_21505073_20453841_19503088_17554300_28118524_18794853_24782177_23918589_24449572_21844665_21452313_23028356_23143596_22446963_24390342_17804836	Rheumatoid_arthritis	73	194	5	0.00139908	1	Cd226 Gata3 Nfkbie Ptpn2 Ubash3a
Nr4a2	21297633_24837172_26192919_28067908_23511034_19122664_19915572_20848476_25082827_23128233_20228798_20228799_19915573_28008999	Ulcerative_colitis	85	98	4	0.00140902	1	Gpr65 Map3k8 Nfkb1 Stat4
Stat4	27015805	Parental_extreme_longevity_(95_years_and_older)	32	265	4	0.00140988	1	Gbp10 Gbp11 Gbp4 Gbp6
Runx2	29403010_27863252_22139419_25705162_23263863_26805783_21507922_20139978_24026423_29066854	Platelet_count	183	201	8	0.00141531	1	Asap1 Cables1 Cass4 Ets1 Runx1 Ston2 Thada Trps1
Zfp960	26634245	Post_bronchodilator_FEV1/FVC_ratio_in_COPD	46	83	3	0.00141575	1	Dennd3 Gcnt1 Prdm16
Foxp3	24388013	Asthma_and_hay_fever	9	110	2	0.00141663	1	Ikzf3 Tns1
Hesx1	28813576_26691988	Advanced_age-related_macular_degeneration	23	42	2	0.00142525	1	C3 Trpm1
Thap1	27386562_18941528_20453840_18997785_21654844_21244703_24076602_28445677_21833088_23412934_19010793_20598377_17660530_19525955_22457343_19525953_22190364	Multiple_sclerosis	102	82	4	0.0014299	1	Ets1 Jazf1 Rasgrp1 Slc9a8
Glis1	27863252	Sum_neutrophil_eosinophil_counts	66	58	3	0.0014317	1	Ccdc125 Cxcr2 Glcci1
Bcl6b	22566634	Economic_and_political_preferences	10	99	2	0.00143177	1	Cd200r1 Eml6
Nfat5	27863252	Sum_neutrophil_eosinophil_counts	66	127	4	0.00143398	1	Ccdc125 Ehd4 Il1rn Stxbp6
Thap1	23740937	Systemic_lupus_erythematosus_and_Systemic_sclerosis	12	82	2	0.0014363	1	Ikzf3 Jazf1
Cebpb	27182965	Monobrow	20	196	3	0.00143946	1	Glis1 Irf4 Zfp608
Nfe2l2	27863252	Neutrophil_percentage_of_granulocytes	77	185	5	0.00144024	1	Bcl2 Chd7 Nfkb1 Rad52 Zfpm1
Ikzf2	23006423	Response_to_taxane_treatment_(docetaxel)	5	210	2	0.00144776	1	Cacna2d1 Ryr2
Relb	27989323	Macrophage_inflammatory_protein_1a_levels	8	126	2	0.001448	1	Zfp365 Zfp36l1
Irf1	27846195	Response_to_paliperidone_in_schizophrenia_(negative_Marder_score)	22	178	3	0.00145152	1	Aff3 Nrp1 Psd3
Zfp263	25877299_26503584_19483681_23666240_28604732_23666239_28604728	Testicular_germ_cell_tumor	34	251	4	0.00145484	1	2900011O08Rik Rfwd3 Tert Zfpm1
Zfp791	27863252	Lymphocyte_percentage_of_white_cells	76	13	2	0.00145592	1	Hormad2 Itga4
Rxra	27863252	Lymphocyte_percentage_of_white_cells	76	381	7	0.00145661	1	Ank1 Creb5 Dnmt3a Ehd4 Gimap7 Itpka Jazf1
Zfp960	27629089	Multiple_system_atrophy	12	83	2	0.00147119	1	Fbn2 Xdh
Klf2	28158719_27863252_29403010_21738480_21738479_20139978_22037903_25096241	White_blood_cell_count	94	152	5	0.00147204	1	Atxn1 Ehd4 Fam53b Lta Pnkd
Rara	24405752_28898252_20849430_22290723_28887542_29621232_20858683_24244560_19096518_29170429_24647736	Glycated_hemoglobin_levels	35	111	3	0.00147253	1	Ank1 Atad2b Tmprss6
Nfkb1	22883433_20185149_18347602_23212062_19571808_23894747_18677311_28991256_18282107_25056061_21926974_22688191_19571811_18332876_21682944_26198764_21679298_23974872_27922604_24043878_22037555_23358160_26531332_22885689_22037552_23142968	Schizophrenia	322	264	13	0.00147291	1	Aig1 Dlg2 Fbxo11 Fyn Gramd1b Inhba Lpp Psd3 Rab8b Rtn1 Spats2l Tspan2 Ttyh3
Rara	27863252	Lymphocyte_percentage_of_white_cells	76	111	4	0.00147407	1	Ank1 Ets1 Itga4 Traf3
Fli1	28199695	Mosquito_bite_size	60	141	4	0.00147794	1	Actn1 Auts2 Fgf2 Zranb3
Srebf1	22120009_23955597_26007630_27363682	Multiple_myeloma	20	198	3	0.00148201	1	Mxi1 Prex1 Tom1
Maf	27863252	Lymphocyte_percentage_of_white_cells	76	613	9	0.00148257	1	Ets1 H2-Ab1 Icam5 Il1rn Jazf1 Lin54 Rbpms Stxbp6 Traf3
Msx2	21979947_23291589	Corneal_structure	16	62	2	0.00148469	1	Adamts6 Lpar1
Msx2	28928442	Number_of_common_colds	16	62	2	0.00148469	1	Fam129a Fndc3a
Bcl6	27846195	Response_to_paliperidone_in_schizophrenia_(CGI-S_score)	14	289	3	0.00148902	1	Adck1 Celf2 Rasgrf2
Zfp280b	19584346_28394258_21223598	Aortic_root_size	10	101	2	0.00148958	1	Cacna1c Kctd7
Irf8	19553259_21935397	Obesity_(extreme)	8	128	2	0.00149383	1	Fbn2 Itpr3
Isl2	28193307_29403010_27863252_23314186_25096241	Monocyte_count	92	92	4	0.00149506	1	Csf1 Lsp1 Stxbp6 Trps1
Mybl1	22610502_22542470	Immune_response_to_smallpox_vaccine_(IL-6)	22	45	2	0.00149513	1	Themis Zhx2
Glis1	27863252	Granulocyte_count	67	58	3	0.00149524	1	Ccdc125 Cxcr2 Glcci1
Fosl2	22293688_18587394_17554261_28067908_26891255_23850713_22412388_17554300_26192919_20570966_17684544_23266558_17435756_22936669_23128233_17804789_21102463_17447842_28008999	Crohn's_disease	113	492	10	0.00149579	1	Ankrd55 Crem Dnmt3a Hormad2 Ifngr2 Jak2 Lpp Notch1 Skap2 Smad3
Hic1	27863252	Neutrophil_percentage_of_granulocytes	77	110	4	0.00149647	1	Asb2 Bcl2l11 Lpp Trerf1
Trp73	22379998	Adverse_response_to_lamotrigine_and_phenytoin	6	175	2	0.0015027	1	Adipor2 Fhit
Bhlhe40	28441456	Facial_morphology_(factor_5,_width_of_mouth_relative_to_central_midface)	6	175	2	0.0015027	1	Bmp7 Hexb
Zbtb7b	22797727	Renal_function-related_traits_(eGRFcrea)	5	214	2	0.00150287	1	Rgs14 Shroom3
Six1	27863252	High_light_scatter_reticulocyte_percentage_of_red_cells	99	145	5	0.00150485	1	Rimklb S1pr2 Sept9 Specc1 Tns1
Sp9	28158719_27863252_29403010	White_blood_cell_count_(basophil)	42	93	3	0.00150753	1	Fam53b Helb Zfpm1
Nfat5	27863252	Granulocyte_count	67	127	4	0.00151641	1	Ccdc125 Ehd4 Il1rn Stxbp6
Meis2	29213071_19305408_19305409_16648850_22726844_24952745_23166209_20031603_23534349	QT_interval	66	129	4	0.00151889	1	Cav1 Fbln1 Ncoa2 Nucks1
Nfe2	17658951_22013104_23251661	Obesity-related_traits	351	304	15	0.00152023	1	Cacna2d1 Cacnb2 Col23a1 Ebf1 Ifngr2 Ipmk Kbtbd11 Mdga2 Mxd3 Ryr2 Slco3a1 Specc1 Unc13a Vsig10 Zfp536
Bach1	27846195	Response_to_paliperidone_in_schizophrenia_(negative_Marder_score)	22	181	3	0.0015228	1	Aff3 Ccdc122 Psd3
Nfe2l2	29403010_20139978_28453575_27863252_28017375	Red_blood_cell_count	115	185	6	0.0015235	1	Bcl2 Egln1 Lin54 Lmo2 Pfas Zfpm1
Gli3	26343387_29472232_29212778_21239051_29263402_24262325_26708285	Coronary_artery_disease	221	131	7	0.00152628	1	Btbd11 Cenpw Fes Procr Ptk7 Svep1 Zhx3
Nr4a2	29494758_23273568_18204447_26502338_24871463_23053960_25862617_21044949_21408207_18204098_20169177_29848360_18204446_19165918_28714469_26606652_22291604_26663301_26316170_19838193_19838195_27399966	Systemic_lupus_erythematosus	147	98	5	0.00152823	1	Ifih1 Ikzf2 Slc29a3 Stat4 Traf3
Plagl1	27863252	Reticulocyte_fraction_of_red_cells	106	136	5	0.00153533	1	Ehd3 Rreb1 S1pr2 Tmc6 Tmcc2
Pparg	24920014_29196614_24149102_21037568_22286212	Hodgkin's_lymphoma	6	177	2	0.00153686	1	Gata3 Il13
Pparg	23717212_22895189_19465909	Malaria	6	177	2	0.00153686	1	Atp2b4 Ddc
Ebf1	21909106_20861866_20385819_23577725_23326517_23455636_20385826_21665990_15761122_23536807_22694956	Age-related_macular_degeneration	18	224	3	0.00153858	1	C3 Pla2g12a Tgfbr1
Twist1	25778476_28183528	Alzheimer's_disease_in_APOE_e4-_carriers	12	85	2	0.00154219	1	Sorl1 Wnt3
Meis1	27863252	Eosinophil_percentage_of_white_cells	88	97	4	0.00154237	1	Lpp Pten Tnfsf8 Zc3h7b
Tcf12	28416818	Prevalent_atrial_fibrillation	5	217	2	0.00154486	1	Anxa4 Zfhx3
Tcf12	29531354_26708676	Ischemic_stroke_(cardioembolic)	5	217	2	0.00154486	1	Hk1 Zfhx3
Junb	27723756	Gut_microbiota_(beta_diversity)	9	115	2	0.00154685	1	Abhd2 Vdr
Mga	27863252	Eosinophil_percentage_of_granulocytes	82	48	3	0.00154707	1	Bcl2l11 Klf3 Tnfsf8
Esr1	20303064_22703881_29403010	Activated_partial_thromboplastin_time	10	103	2	0.0015485	1	Plxdc2 Selp
Foxo1	25456346_24677629_26114229_27167565_23726511	Post-traumatic_stress_disorder	10	103	2	0.0015485	1	Ankrd55 Ust
Gata1	26974007	Chronic_inflammatory_diseases_(ankylosing_spondylitis,_Crohn's_disease,_psoriasis,_primary_sclerosing_cholangitis,_ulcerative_colitis)_(pleiotropy)	93	230	6	0.00154973	1	Dnmt3a Ern1 Il23r Nfkb1 Sbno2 Ubash3a
Irf1	27005419	Erythrocyte_cadmium_concentration_in_never_smokers	6	178	2	0.00155409	1	Psd3 Slc39a8
Arid5a	28199695	Itch_intensity_from_mosquito_bite_adjusted_by_bite_size	73	54	3	0.00155716	1	Kif3a Myo3b Wnt3
Lhx6	29875488_28240269	Blood_protein_levels	620	139	13	0.00155827	1	B4galnt3 Cd109 Ephb2 Fgf2 Il23r Mgat5 Mndal Nrp2 Nucb2 Procr Ptgfrn Slamf7 Tgfbi
Gli3	22443383_17903294	Hemostatic_factors_and_hematological_phenotypes	8	131	2	0.00156386	1	Mdga2 Procr
Srf	26252872	Cerebral_amyloid_deposition_in_APOEe4_non-carriers_(PET_imaging)	8	131	2	0.00156386	1	Gng4 Rhoc
Sall4	28441456	Facial_morphology_(factor_21,_depth_of_nasal_alae)	8	131	2	0.00156386	1	Hlf Ntrk3
Foxn2	27863252	Neutrophil_percentage_of_white_cells	59	67	3	0.00157099	1	Acoxl Bcl2l11 Scml4
Sox21	27082954	Peripheral_arterial_disease_(traffic-related_air_pollution_interaction)	61	141	4	0.00157171	1	Lrba Maf Paqr8 Peli2
Fbxl19	22899653_26732429_21725308_18780872_24880342_18978790_23143601_18978787_19654303_28604730_18385738_27393504_20304703_18385676	Lung_cancer	60	17	2	0.00157316	1	Numbl Tert
Trp73	29146897_18849991_22693459_27182965	Male-pattern_baldness	23	175	3	0.00157792	1	Ebf1 Fam53b Hdac9
Jdp2	25130324	Heschl's_gyrus_morphology	10	104	2	0.00157837	1	Cd28 Prkca
Foxb1	21297633_24837172_26192919_28067908_23511034_19122664_19915572_20848476_25082827_23128233_20228798_20228799_19915573_28008999	Ulcerative_colitis	85	171	5	0.00158181	1	Cd28 Il10 Il23r Ptprc Sema6d
Foxf2	21297633_24837172_26192919_28067908_23511034_19122664_19915572_20848476_25082827_23128233_20228798_20228799_19915573_28008999	Ulcerative_colitis	85	253	6	0.00158224	1	Bsn Ets1 Il23r Map3k8 Procr Zfp90
Gabpa	24163127_21824976_19648920_20972438_25281661_27206850_21750109	Bladder_cancer	8	132	2	0.00158755	1	Clk3 Pag1
Ebf1	29403010_22286170_27863252	Lymphocyte_counts	96	224	6	0.00159526	1	Acoxl Arhgef3 Fam49b Ikbke Il2ra Rap1gap2
Rarg	29403010_27863252_28017375_28453575_19862010_29615537	Hematocrit	76	192	5	0.00160019	1	Gprc5a Rgs14 Sbf2 Stab1 Vav2
Maf	28193307_29403010_27863252_23314186_25096241	Monocyte_count	92	613	10	0.00160047	1	Acvrl1 Ccr3 Ets1 Foxo1 Slc2a1 Slc9a3r1 Ssbp4 Ssh2 Stxbp6 Treml2
Rxra	23263486_21983786_22179738_27899376_25967671_29453348_25646370	Gout	39	381	5	0.00160891	1	Abcc9 Jazf1 Nrxn2 Prkca Vdr
Nfia	28470677	Survival_in_pancreatic_cancer	15	69	2	0.00160975	1	Runx2 Zfp608
Hdx	27629089	Multiple_system_atrophy	12	87	2	0.00161481	1	Fbn2 Mdga2
Mitf	19448622_19448623_23667675_23599027_27182965_21102462_25231870_29773799	Menarche_(age_at_onset)	74	54	3	0.00161937	1	Agap1 Atrnl1 Crtc1
Arnt2	29255261_27089181_23229837_27918536_20634892_25993607_29292387_17667963_18762592_27067015	Neuroticism	103	84	4	0.00162041	1	Kcnc2 Lingo1 Ncam1 Sox6
Jun	27863252	Reticulocyte_count	97	390	8	0.00162165	1	Cav1 Dnaja4 Hk1 Iqgap2 Smox Thrb Tmprss6 Trps1
Egr2	27863252	Monocyte_percentage_of_white_cells	93	316	7	0.00162364	1	Acoxl Bcl2l11 Dock10 Ifitm2 Nfkbie Sh2d3c Tbc1d14
Foxj1	24124411	Liver_enzyme_levels_(aspartate_transaminase)	6	182	2	0.00162391	1	Got1 Robo1
Atf3	29403010_27863252_28017375_28453575_19862010_29615537	Hematocrit	76	285	6	0.0016248	1	Gprc5a L3mbtl3 Pnpla3 Sbf2 Stab1 Vegfa
Nfkb2	29494758_23273568_18204447_26502338_24871463_23053960_25862617_21044949_21408207_18204098_20169177_29848360_18204446_19165918_28714469_26606652_22291604_26663301_26316170_19838193_19838195_27399966	Systemic_lupus_erythematosus	147	199	7	0.0016254	1	Bank1 H2-Aa Il2ra Itgam Notch2 Pparg Prdm1
Junb	22700719_28165464_18758461_21131588_23770605_24292274_26956414	Chronic_lymphocytic_leukemia	35	115	3	0.00163001	1	Arsb Gramd1b Irf4
Irf2	18821565	Hyperactive-impulsive_symptoms	5	223	2	0.00163053	1	Meis2 Mta3
Irf2	25884002	Neutrophil_count_in_HIV-infection	5	223	2	0.00163053	1	Ifi203 Mndal
Rorc	27386562_18941528_20453840_18997785_21654844_21244703_24076602_28445677_21833088_23412934_19010793_20598377_17660530_19525955_22457343_19525953_22190364	Multiple_sclerosis	102	371	8	0.00163473	1	Alpk2 Batf Ets1 Il7r Jazf1 L3mbtl3 Malt1 Rreb1
Zfp652	29403010_28887542	Alanine_transaminase_levels	23	45	2	0.0016348	1	Akna Pnpla3
Zeb1	29083406	Allergic_disease_(asthma,_hay_fever_or_eczema)	51	171	4	0.00163725	1	Lpp Rorc Smad3 Stat5b
Lef1	27386562_18941528_20453840_18997785_21654844_21244703_24076602_28445677_21833088_23412934_19010793_20598377_17660530_19525955_22457343_19525953_22190364	Multiple_sclerosis	102	212	6	0.00164642	1	Ets1 Il7r Ncoa2 Plekhg5 Slamf7 Vav2
Irf9	21383967	Celiac_disease_or_Rheumatoid_arthritis	13	81	2	0.00165163	1	Ifi203 Ifi204
E4f1	23259602_21940522_23064961	Dental_caries	26	40	2	0.00165401	1	Abcg2 Celf2
Fli1	29403010_19198610_27863252	Eosinophil_counts	104	141	5	0.00165475	1	Ankrd33b Kdm6b Klf3 Trerf1 Zfp365
Zscan10	17903302	Tonometry	9	119	2	0.00165502	1	Exoc4 Slc9a9
Smad3	27918534_22589738_26480920_29178545	Subcutaneous_adipose_tissue	14	300	3	0.00165743	1	Mgat5 Rora Smad6
Tcf4	26379185	Influenza_A_(H1N1)_infection	8	135	2	0.00165965	1	Dlg2 Dmd
Maf	29403010	Albumin-globulin_ratio	25	613	5	0.00166064	1	Fads2 Reps1 Tbc1d16 Traf3 Txlnb
Zfp182	19779542_23406873_21640322_21095009_22685421_23049088	Myopia_(pathological)	26	157	3	0.00166214	1	Fli1 Sntb1 Srpk2
Bbx	24324551	Ejection_fraction_in_Tripanosoma_cruzi_seropositivity	11	97	2	0.00167447	1	Atxn1 Slc5a11
Foxb1	23143596	Rheumatoid_arthritis_(ACPA-positive)	24	171	3	0.00167542	1	Aff3 Ankrd55 D1Ertd622e
Foxo3	23319000	Metabolite_levels_(HVA)	6	185	2	0.00167725	1	Kif13b Vgll4
Foxo3	17903296	Hip_geometry	6	185	2	0.00167725	1	Dlg2 Frmd4b
Nfe2l2	20195514_23704328	Primary_tooth_development_(number_of_teeth)	6	185	2	0.00167725	1	Cacnb2 Msrb3
Sox13	28203683	Venous_thromboembolism_adjusted_for_sickle_cell_variant_rs77121243-T	30	136	3	0.00167859	1	Lhpp Pard3b Tbc1d4
Stat1	19936222_22286219	Lipid_metabolism_phenotypes	15	280	3	0.00167917	1	Bcl3 Lpl Pltp
Stat1	29777097	Family_history_of_Alzheimer's_disease	15	280	3	0.00167917	1	Bcam Bcl3 Zcwpw1
Satb1	21297633_24837172_26192919_28067908_23511034_19122664_19915572_20848476_25082827_23128233_20228798_20228799_19915573_28008999	Ulcerative_colitis	85	256	6	0.00167961	1	Cd226 Cd28 Il10 Ptprc Smad3 Zfp90
Pparg	20966902_20189936_21998595_19893584_23456168_25133637_25429064_20397748_23563607_22021425_20668459_20881960_29782485_18391952_19396169_19570815_17767157_18391950_19030899_18952825_18193045_19729412_18391951_19343178_25282103_28270201	Height	264	177	9	0.00168065	1	Adamtsl3 Amz1 Dnajc27 Fli1 Kdm6b Npr3 Otud7b Sytl2 Tns1
Plagl1	25188341	Neurofibrillary_tangles	8	136	2	0.00168403	1	Itga4 Tnnt2
Rora	24489884	Anger	8	136	2	0.00168403	1	Abat Iyd
Rora	27021288_26184070	Oppositional_defiant_disorder_dimensions_in_attention-deficit_hyperactivity_disorder	8	136	2	0.00168403	1	Adam12 Sox5
Zfhx3	27863252	Monocyte_percentage_of_white_cells	93	94	4	0.00168426	1	Eif4e3 Foxo1 Nfkbie Pik3ap1
Nr1d2	23284291	Pulmonary_function_(smoking_interaction)	22	48	2	0.00169959	1	Adam19 Ppp1r14c
Nr1d2	22138694_21743469_20062062_23749187	Ankylosing_spondylitis	22	48	2	0.00169959	1	Il1r1 Il23r
Grhl2	29292387	Depressive_symptoms_(MTAG)	22	48	2	0.00169959	1	Sema6d Sox6
Klf10	27790247	Age-related_diseases,_mortality_and_associated_endophenotypes	24	44	2	0.00170278	1	Bcl3 Itpk1
Plagl2	27117709_28171663_29058716	Breast_cancer_(estrogen-receptor_negative)	24	44	2	0.00170278	1	Lsp1 Tert
Nkx3-1	26879886	Low_high_density_lipoprotein_cholesterol_levels	5	228	2	0.00170364	1	Abca1 Plcl1
Etv4	27863252	Neutrophil_percentage_of_white_cells	59	69	3	0.00170988	1	Cdk6 Nfkb1 Zfp36l2
Zbtb33	26977737_29077507	Obstructive_sleep_apnea_trait_(apnea_hypopnea_index)	9	121	2	0.00171043	1	Hdac4 Nbea
Sp2	25898920_24816252	Blood_metabolite_levels	102	145	5	0.00171758	1	Arhgap17 Fads2 Lactb Mboat7 Slc6a13
Rfx7	21507922_29403010_20172861_27863252_25096241	Neutrophil_count	80	51	3	0.0017176	1	Acvr1b Pnkd Rreb1
Atf3	29403010_19198610_27863252	Eosinophil_counts	104	285	7	0.00172141	1	Apbb1ip Bcl2 Brd3 Exoc2 Ikzf2 Runx1 Trerf1
Plagl2	26974007	Chronic_inflammatory_diseases_(ankylosing_spondylitis,_Crohn's_disease,_psoriasis,_primary_sclerosing_cholangitis,_ulcerative_colitis)_(pleiotropy)	93	44	3	0.00172567	1	Il2ra Notch1 Zpbp2
Nfatc2	25245031_24159190	Symmetrical_dimethylarginine_levels	12	90	2	0.00172676	1	Nucks1 Slco3a1
Thra	27790247	Age-related_diseases_and_mortality	7	159	2	0.00172944	1	Itpk1 Tcf7l2
Bach1	27863252	Eosinophil_percentage_of_granulocytes	82	181	5	0.00173116	1	Bcl2a1a Dock3 H2-Aa Nfkb1 Zfp652
Runx2	19448622_19448623_23667675_23599027_27182965_21102462_25231870_29773799	Menarche_(age_at_onset)	74	201	5	0.00173772	1	Agap1 Cenpw Gtf2i Klf12 Trim66
Bach1	29146897_18849991_22693459_27182965	Male-pattern_baldness	23	181	3	0.00173776	1	Ebf1 Hdac9 Irf4
Tal2	28112199	B-cell_malignancies_(chronic_lymphocytic_leukemia,_Hodgkin_lymphoma_or_multiple_myeloma)_(pleiotropy)	11	99	2	0.00174339	1	Gramd1b Lpp
Hoxb1	29292387	Depressive_symptoms	11	99	2	0.00174339	1	Celf4 Dcc
Hoxb1	29292387	Neuroticism_(MTAG)	11	99	2	0.00174339	1	Celf4 Dcc
Stat4	22493691_27182965	Hypothyroidism	16	265	3	0.00174479	1	Pde10a Tg Vav3
Irf4	27863252	Eosinophil_percentage_of_granulocytes	82	822	11	0.00174897	1	Asb2 Bcl2 Bcl2l11 Dock3 Exoc2 Ikzf2 Kdm6b Nfkb1 Pten Tnfsf8 Zfpm1
Foxo1	25574825_18364390_25903422_23143594_18369459_25939698_28537254_20953188_20953189_19169255_19169254_20953190	Psoriasis	40	103	3	0.00175366	1	Bloc1s2 Ifih1 Zfp365
Foxo1	22293688_18840781_17554260_17554300_19966805_18198356_25751624_17632545_21829393_18978792_21980299_19430480	Type_1_diabetes	40	103	3	0.00175366	1	Cd226 Ifih1 Il7r
Klf12	28927378	Caudate_activity_during_reward	8	139	2	0.0017582	1	Col5a3 Nxn
Cebpg	29146897_18849991_22693459_27182965	Male-pattern_baldness	23	182	3	0.00176534	1	Ebf1 Fam53b Hdac9
Tcf7l1	24388013	Asthma_and_hay_fever	9	123	2	0.00176672	1	Ikzf3 Vav3
Zfp956	29403010_22286170_27863252	Lymphocyte_counts	96	43	3	0.00176821	1	Fam49b Ikbke Lta
Myt1l	21107309_19721433_20195266_23241943	Response_to_antipsychotic_treatment	22	49	2	0.00177055	1	Meis2 Trpm1
Mitf	27182965	Monobrow	20	54	2	0.00177234	1	Hdac9 Zfp608
Stat3	17558408_20190752_18311140_22057235_24999842_23936387	Celiac_disease	32	479	5	0.00177338	1	Frmd4b Lpp Ptpn2 Ubash3a Wnt3
Gata1	29739929	Low_tan_response	39	230	4	0.00177408	1	Atp11a Sla2 Tm9sf4 Trps1
Hhex	27723758	Selective_IgA_deficiency	13	84	2	0.00177476	1	Gata3 Ikzf3
Gata2	26390057_29403010_28135244_27618447_28739976_28498854	Pulse_pressure	77	194	5	0.00177492	1	Esr1 Fn1 Inpp5b Lhfpl2 Slc24a3
Thrb	23722424_27046643_25201988	Educational_attainment	38	109	3	0.00177667	1	Bace2 Cep170 Itsn1
Batf3	27863252	High_light_scatter_reticulocyte_count	112	37	3	0.0017769	1	Bcl2 H2-Q10 Riok3
Trps1	18758464_26192919_28067908_17068223_27569725_23128233_28008999	Inflammatory_bowel_disease	130	32	3	0.00178215	1	Galc Gpr65 Zfp831
Etv6	25014791_21156761_20453842_21505073_20453841_19503088_17554300_28118524_18794853_24782177_23918589_24449572_21844665_21452313_23028356_23143596_22446963_24390342_17804836	Rheumatoid_arthritis	73	205	5	0.00178327	1	Cdk6 Il2rb Rasgrp1 Syngr1 Ubash3a
Egr1	27989323	Fibroblast_growth_factor_basic_levels	6	191	2	0.00178645	1	Serpine2 Sgms2
Ascl2	20852631_22452962_20585626_22951594_19330030_23535733_17903305_25751625_25327703_24143190_25038754_17529967_29059683_21908515_27117709_23354978_28171663_29058716_23468962_18326623_21424380_22383897_23535729_20872241_19330027_20453838_25956309_22976474_27354352_21263130_17529974_17529973_25824743_22037553	Breast_cancer	286	165	9	0.00179214	1	Ahrr Baiap2l1 Cntnap1 Dmd Esr1 Gipr Nrip1 Phlda3 Satb1
Ppard	24388013	Asthma_and_hay_fever	9	124	2	0.00179519	1	Smad3 Tns1
Rara	25130324	Heschl's_gyrus_morphology	10	111	2	0.00179519	1	Prkca Tnfaip8
Erg	28928442	Measles	16	268	3	0.00180188	1	Hunk Nck2 Pappa2
Batf	18758464_26192919_28067908_17068223_27569725_23128233_28008999	Inflammatory_bowel_disease	130	759	14	0.00180278	1	Cd28 Cdyl2 Dnmt3b Fads2 Fcgr3 Hormad2 Ifih1 Lpp Lpxn Ptpn2 Rgs14 Rorc Sema6d Tnfsf15
Rxra	22293688_18840781_17554260_17554300_19966805_18198356_25751624_17632545_21829393_18978792_21980299_19430480	Type_1_diabetes	40	381	5	0.00180584	1	Cd226 Ifih1 Lmo7 Ptpn2 Ubash3a
Ets1	27790247	Age-related_diseases,_mortality_and_associated_endophenotypes	24	383	4	0.0018061	1	Bcl3 Itpk1 Maml3 Plcg1
Ppara	27021288_26184070	Oppositional_defiant_disorder_dimensions_in_attention-deficit_hyperactivity_disorder	8	141	2	0.0018085	1	Bmp7 Sox5
Ppara	28644415	Western_dietary_pattern	8	141	2	0.0018085	1	Eea1 Kcnq5
Fli1	27989323	Macrophage_inflammatory_protein_1a_levels	8	141	2	0.0018085	1	Zfp365 Zfp36l1
Gfi1	22899653_26732429_21725308_18780872_24880342_18978790_23143601_18978787_19654303_28604730_18385738_27393504_20304703_18385676	Lung_cancer	60	149	4	0.00180949	1	Ddr1 Mpzl2 Sema6d Wdr76
Foxp1	27863252	Neutrophil_percentage_of_granulocytes	77	54	3	0.00181529	1	Brd3 Pparg Zfp365
Rreb1	21546767	Dialysis-related_mortality	7	163	2	0.00181642	1	Sh3bp4 Tet3
Meis1	28193307_29403010_27863252_23314186_25096241	Monocyte_count	92	97	4	0.00181673	1	Ccnd3 Ets1 Lsp1 Tbc1d14
Klf3	29403010_22286170_27863252	Lymphocyte_counts	96	93	4	0.00181976	1	Arhgef3 Atp2b4 Ikbke Rreb1
Tead1	24324551	QRS_duration_in_Tripanosoma_cruzi_seropositivity	15	288	3	0.00182014	1	Dlg2 Ncam1 Pla2g4f
Foxc1	29403010_28887542	Alanine_transaminase_levels	23	184	3	0.00182134	1	Akna Pik3ap1 Shroom3
Gata1	29403010_22286170_27863252	Lymphocyte_counts	96	230	6	0.0018235	1	Dnmt3a Icam1 Ikzf3 L3mbtl3 Ly9 Ptprc
Srebf1	29403010_27863252_28017375_28453575_19862010_29615537	Hematocrit	76	198	5	0.00183149	1	Arhgef40 Pfas Pparg Rgs14 Shroom3
Ahr	28928442	Chronic_sinus_infection	16	69	2	0.00183496	1	Aff3 Maf
Hmgb3	28928442	Measles	16	69	2	0.00183496	1	Myo1e Ypel2
Irf7	21546767	Dialysis-related_mortality	7	164	2	0.00183849	1	Pdzrn3 Sh3bp4
Irf5	26420894	Glomerular_filtration_rate_in_chronic_kidney_disease	6	194	2	0.00184229	1	Alcam Dlgap3
Zeb1	27863252	Eosinophil_percentage_of_white_cells	88	171	5	0.0018447	1	Bcl2a1d Cog6 Dock3 Lpp Smad3
Klf2	27863252	High_light_scatter_reticulocyte_percentage_of_red_cells	99	152	5	0.00185176	1	Atxn1 Bcl2l11 Pnkd Sema4d Tmc6
Xbp1	25574825_18364390_25903422_23143594_18369459_25939698_28537254_20953188_20953189_19169255_19169254_20953190	Psoriasis	40	105	3	0.00185291	1	Ets1 Exoc2 Rps6ka4
Irf5	27846195	Response_to_paliperidone_in_schizophrenia_(negative_Marder_score)	22	194	3	0.00185707	1	Iqgap2 Psd3 Zfp362
Rel	29083406	Allergic_disease_(asthma,_hay_fever_or_eczema)	51	177	4	0.00185733	1	Il2ra Il7r Rora Smad3
Elk3	29403010_20139978_28453575_27863252_28017375	Red_blood_cell_count	115	261	7	0.00186173	1	Lin54 Prkar1b Rcl1 Rreb1 Sh2b1 Tbx6 Zfp641
Rorc	29403010_27863252_28017375_23263863_28453575_19862010_20139978	Mean_corpuscular_volume	180	371	11	0.0018622	1	Acoxl Atp2b4 Fam46c Foxo1 Grina Hsf2bp Kdelc2 Mpp1 Tmprss6 Unc119b Zfpm1
Ebf1	27863252	High_light_scatter_reticulocyte_percentage_of_red_cells	99	224	6	0.00186716	1	Bcl2l11 Cav1 Ehd3 Rcl1 Riok3 Stx7
Rxrb	26053186	3-hydroxy-1-methylpropylmercapturic_acid_levels_in_smokers	75	56	3	0.0018693	1	Itpr1 Lama5 Nfatc1
Mycn	25035420_23534349_27659466_27577874_21076409	QRS_duration	27	41	2	0.00187337	1	Fhod3 Themis
Zfp787	28604730	Lung_cancer_in_ever_smokers	41	27	2	0.00187337	1	Cep170 Ncoa1
Fosb	17658951_22013104_23251661	Obesity-related_traits	351	86	7	0.00187471	1	Arhgef3 Ece1 Hdac9 Myo10 Psd3 Ubtd1 Zfp536
Nfat5	27863252	Myeloid_white_cell_count	71	127	4	0.00187924	1	Ccdc125 Ehd4 Il1rn Stxbp6
Cebpb	17903296	Hip_geometry	6	196	2	0.00187999	1	Dlg2 Tapbpl
Cebpb	28441456	Facial_morphology_(factor_16)	6	196	2	0.00187999	1	Dlg2 Nid2
Rorc	29403010	Albumin-globulin_ratio	25	371	4	0.00188119	1	Acoxl Dab2 Il1r1 Reps1
Zbtb3	28441456	Facial_morphology_(factor_15,_philtrum_width)	12	94	2	0.00188164	1	Lonp2 Rab33a
Irf4	19197348	Quantitative_traits	12	822	4	0.00188258	1	Cacnb2 Hemgn Hmgcr Trim24
Prrx1	20485516_29760442_23493294_20719862_28171582	Central_corneal_thickness	28	152	3	0.00188432	1	Fbn1 Lpar1 Ltbp1
Irf1	21297633_24837172_26192919_28067908_23511034_19122664_19915572_20848476_25082827_23128233_20228798_20228799_19915573_28008999	Ulcerative_colitis	85	178	5	0.00188636	1	Cacna2d1 Gpr65 Prdm1 Ptpn2 Rorc
Hic1	27863252	Eosinophil_percentage_of_granulocytes	82	110	4	0.00188751	1	Asb2 Bcl2l11 Lpp Trerf1
Mga	27863252	Eosinophil_percentage_of_white_cells	88	48	3	0.0018947	1	Bcl2l11 Klf3 Tnfsf8
Maf	21804548_21814517_17611496_21907864_26620591_28461288_23028483_27182965_21804549_21150878_22561531_20032318_29273806_20159242_27611488_20860503_19426955	Asthma	64	613	8	0.00189473	1	Gab1 Gli3 Ikzf3 Il13 Il18r1 Pbx2 Rora Smad3
Esrra	28937693_23743675_21471458_23942779_21270382_27911795	Alcohol_consumption	17	66	2	0.00189983	1	Ccdc63 Tspan5
Tigd2	25646338	Trans_fatty_acid_levels	19	59	2	0.00190478	1	Fads2 Gprin3
Foxo3	27863252	Eosinophil_percentage_of_granulocytes	82	185	5	0.00190508	1	Apbb1ip Auh Bcl2a1d Brd3 Zfpm1
Nfe2l2	27863252	Eosinophil_percentage_of_granulocytes	82	185	5	0.00190508	1	Bcl2 Chd7 Nfkb1 Rad52 Zfpm1
Spib	23319000	Metabolite_levels_(HVA)	6	198	2	0.00191805	1	Kif13b Vgll4
Srebf1	22797727	Renal_function-related_traits_(sCR)	6	198	2	0.00191805	1	Rgs14 Shroom3
Homez	22700719_28165464_18758461_21131588_23770605_24292274_26956414	Chronic_lymphocytic_leukemia	35	32	2	0.00191977	1	Bank1 Lpp
Hmga2	20485516_29760442_23493294_20719862_28171582	Central_corneal_thickness	28	153	3	0.00191992	1	Fbn1 Lpar1 Ltbp1
Zfp750	22449649_28530673	Intelligence	14	81	2	0.00192102	1	Exoc4 Zfp365
Ahctf1	29071344	Major_depression_and_alcohol_dependence	14	81	2	0.00192102	1	Ncald Nln
Zic2	22368281_20339536	Response_to_statin_therapy	11	104	2	0.00192152	1	Fads2 Glis1
Zfp628	27863252	Plateletcrit	126	72	4	0.00192225	1	Hdac9 Rnf150 Runx1 Zfpm1
Nfkb2	23319000	Metabolite_levels_(HVA)	6	199	2	0.00193722	1	Kif13b Vgll4
Nfkb2	27989323	Interleukin-4_levels	6	199	2	0.00193722	1	Rorc Vgll4
Nfkb2	23717212_22895189_19465909	Malaria	6	199	2	0.00193722	1	Atp2b4 Ddc
Klf7	27989323	Interleukin-4_levels	6	199	2	0.00193722	1	Trib3 Vgll4
Zfp105	19553259_21935397	Obesity_(extreme)	8	146	2	0.00193725	1	Eml6 Itpr3
Meis2	27989323	Macrophage_Migration_Inhibitory_Factor_levels	9	129	2	0.00194086	1	Chn2 Mdga2
Rela	29403010_27863252_22139419_25705162_23263863_26805783_21507922_20139978_24026423_29066854	Platelet_count	183	122	6	0.00194828	1	Actn1 Mxi1 Pnpla3 Tnfrsf1a Trim12c Zfp36l2
Irf4	23247143	Cardiac_Troponin-T_levels	6	822	3	0.00195044	1	Bcl2 Dlgap1 Tnnt2
Nfkb1	22700719_28165464_18758461_21131588_23770605_24292274_26956414	Chronic_lymphocytic_leukemia	35	264	4	0.00195295	1	Acoxl Gramd1b Irf4 Lpp
Erg	22293688_18587394_17554261_28067908_26891255_23850713_22412388_17554300_26192919_20570966_17684544_23266558_17435756_22936669_23128233_17804789_21102463_17447842_28008999	Crohn's_disease	113	268	7	0.0019559	1	Ankrd55 Bank1 Bsn Jak2 Litaf Rasgrp1 Rgs14
Sox13	26390057_29403010_28135244_27618447_28739976_29212154_29615537_25249183_28498854_19430483_29208002_21909115_19430479_26969751	Systolic_blood_pressure	112	136	5	0.0019574	1	Enpep Itga11 Itpr1 Nucb2 Zfp318
Hmg20b	27082954	Peripheral_arterial_disease_(traffic-related_air_pollution_interaction)	61	70	3	0.00196153	1	Lrba Maf Rilpl2
Nr4a2	27863252	Monocyte_percentage_of_white_cells	93	98	4	0.00196265	1	Acoxl Cdk6 Itga4 Nfkb1
Fosb	27863252	Reticulocyte_fraction_of_red_cells	106	86	4	0.00196323	1	Ank1 Arhgef3 Bcl2l11 Rreb1
Atf3	29198719	Lobe_attachment_(rater-scored_or_self-reported)	54	285	5	0.00196392	1	Ddah1 Glis1 Hmcn1 Myo3b Nrp1
Zfp641	28443625	Waist_circumference_adjusted_for_BMI_(joint_analysis_main_effects_and_smoking_interaction)	42	27	2	0.00196513	1	Adamtsl3 Lin28b
Zfp266	28158719_27863252_29403010	White_blood_cell_count_(basophil)	42	27	2	0.00196513	1	Cdk6 Pten
Zbtb44	28199695	Mosquito_bite_size	60	19	2	0.00196917	1	Bbs12 Usp22
Runx2	17903296	Hip_geometry	6	201	2	0.00197584	1	Dlg2 Frmd4b
Runx2	28441456	Facial_morphology_(factor_16)	6	201	2	0.00197584	1	Dlg2 Nid2
Ikzf2	25014791_21156761_20453842_21505073_20453841_19503088_17554300_28118524_18794853_24782177_23918589_24449572_21844665_21452313_23028356_23143596_22446963_24390342_17804836	Rheumatoid_arthritis	73	210	5	0.00198137	1	Cd226 Irf5 Prkch Slc9a9 Tec
Ahrr	25811787	Urate_levels_in_obese_individuals	13	89	2	0.00198943	1	Lgr4 Myo3b
Batf	27863252	Neutrophil_percentage_of_granulocytes	77	759	10	0.00199386	1	Asb2 Bcl2a1d Bcl2l11 Ikzf2 Klf3 Lpp Pten Rasgrp4 Spsb1 Zfp365
Lhx5	25387704	Electroencephalogram_traits	11	106	2	0.00199511	1	Pcdh7 Ppp2r2c
Jund	17903302	Tonometry	9	131	2	0.00200066	1	Exoc4 Prex1
Nfic	27863252	Granulocyte_percentage_of_myeloid_white_cells	90	48	3	0.00202051	1	Ccnd3 Cdk6 Sh2d3c
Otx1	28158719_27863252_29403010_21738480_21738479_20139978_22037903_25096241	White_blood_cell_count	94	46	3	0.00202351	1	Aim2 Lta Pnkd
Fosl1	26049409_17553421_20885792_21390209_28714976_26339675_24162737_22881374_21379329_21460841_23571587_23565137	Alzheimer's_disease_(late_onset)	36	259	4	0.00202512	1	Ahnak Celf2 Sorl1 Zcwpw1
Gata1	27863252	Sum_eosinophil_basophil_counts	98	230	6	0.00202539	1	Apbb1ip Asb2 Auh Nfatc2 Nfkb1 Ptprc
Sox13	17558408_20190752_18311140_22057235_24999842_23936387	Celiac_disease	32	136	3	0.00202721	1	Ets1 Frmd4b Mttp
Zfp462	25524916	Glucose_homeostasis_traits	36	32	2	0.00203034	1	Dcc P2ry2
Gabpa	17903302	Tonometry	9	132	2	0.00203089	1	Exoc4 Syne1
Sox6	24159190	Serum_dimethylarginine_levels_(asymmetric/symetric_ratio)	11	107	2	0.0020324	1	Slc25a45 Zcchc24
Egr3	27723758	Selective_IgA_deficiency	13	90	2	0.00203378	1	Gata3 Ptpn2
Usf2	27863252	Lymphocyte_percentage_of_white_cells	76	57	3	0.00204307	1	Chd7 Mxd3 Nlrc5
Gata3	23544013_29058716	Breast_Cancer_in_BRCA1_mutation_carriers	8	150	2	0.00204333	1	Kdelc2 Ncoa1
Rxra	22424883	Pulmonary_function_decline	12	381	3	0.00204375	1	Ank1 Cntln Svep1
Hmx3	18758464_26192919_28067908_17068223_27569725_23128233_28008999	Inflammatory_bowel_disease	130	71	4	0.00204645	1	Ergic1 Il10 Ipmk Lpp
Zfp9	25035420_23534349_27659466_27577874_21076409	QRS_duration	27	43	2	0.002059	1	Fhod3 Prdm16
Zfp263	24564958_24047820	Social_communication_problems	5	251	2	0.00205997	1	Celf4 Dock1
Zfp263	23006423	Response_to_taxane_treatment_(docetaxel)	5	251	2	0.00205997	1	Slc6a6 Zbtb7c
Foxs1	23144326	Chronic_obstructive_pulmonary_disease-related_biomarkers	9	133	2	0.00206133	1	Anxa11 Rnf150
Xbp1	27863252	Eosinophil_percentage_of_white_cells	88	105	4	0.00206307	1	Bcl2a1d Exoc2 Nfatc2 Zc3h7b
Hhex	29071344	Major_depression_and_alcohol_dependence	14	84	2	0.00206399	1	Igsf9b Klf12
Maf	27846195	Response_to_paliperidone_in_schizophrenia_(positive_Marder_score)	16	613	4	0.00206404	1	Adck1 Cacna1s Cwh43 Rnf135
Prdm1	27117709_28171663_29058716	Breast_cancer_(estrogen-receptor_negative)	24	184	3	0.00206526	1	Lsp1 Tcf7l2 Tert
Batf	19836008_22797724_20700438_28604730_20871597_27393504	Lung_adenocarcinoma	31	759	6	0.00206799	1	Cables1 Dctn4 Irf4 Ncoa1 Numbl Sbf2
Runx2	27863252	Neutrophil_percentage_of_granulocytes	77	201	5	0.00207223	1	Bcl2a1b Bcl2a1d Klf3 Runx1 Trerf1
Dbp	23603761	Juvenile_idiopathic_arthritis_(oligoarticular_or_rheumatoid_factor-negative_polyarticular)	17	69	2	0.00207424	1	Il2ra Stat4
Zfp629	22961000	Primary_biliary_cirrhosis	13	91	2	0.0020786	1	Irf5 Syngr1
Sp2	27863252	Sum_basophil_neutrophil_counts	64	145	4	0.00207943	1	Brd3 Fads2 Ifitm2 Rreb1
Bcl6b	28441456	Facial_morphology_(factor_15,_philtrum_width)	12	99	2	0.00208423	1	Lonp2 Napb
Stat2	27989323	Interferon_gamma_levels	9	134	2	0.002092	1	Cysltr2 Palld
Foxf2	27639821	Mortality_in_sepsis	5	253	2	0.0020925	1	Lpp Vps13a
Irf4	27182965	Monobrow	20	822	5	0.00209372	1	Auts2 Bmp7 Hdac9 Irf4 Zfp608
Stat4	23603761	Juvenile_idiopathic_arthritis_(oligoarticular_or_rheumatoid_factor-negative_polyarticular)	17	265	3	0.0020947	1	Fas Il2ra Il2rb
Pou2af1	23459443	QT_interval_(drug_interaction)	8	152	2	0.00209738	1	Crebbp Fastkd2
Msx2	27846195	Response_to_paliperidone_in_schizophrenia_(PANSS_score)	19	62	2	0.00210102	1	B9d1 Tox
Sgsm2	27863252	Sum_neutrophil_eosinophil_counts	66	141	4	0.00210328	1	Cxcl5 Ifitm2 Stxbp6 Tert
Etv2	22493691_27182965	Hypothyroidism	16	74	2	0.00210691	1	Pde10a Tg
Klf2	25898920_24816252	Blood_metabolite_levels	102	152	5	0.00211144	1	Fads2 Gls2 Ivd Slc22a2 Zcwpw1
Zic5	27863252	Neutrophil_percentage_of_white_cells	59	20	2	0.00211176	1	Cdk6 Il1rn
Runx1	27989323	Interleukin-7_levels	7	176	2	0.00211333	1	Atp6v0d2 Paqr8
Myb	17903302	Tonometry	9	135	2	0.00212288	1	Slc9a9 Syne1
Irf2	27386562_18941528_20453840_18997785_21654844_21244703_24076602_28445677_21833088_23412934_19010793_20598377_17660530_19525955_22457343_19525953_22190364	Multiple_sclerosis	102	223	6	0.00212463	1	Asap1 Rasgrp1 Stat4 Tnfrsf1a Traf3 Trim2
Klf5	28443625	Waist-to-hip_ratio_adjusted_for_BMI_in_non-smokers	8	153	2	0.00212467	1	Ccdc92 Rfx7
Etv1	27989323	Stem_cell_factor_levels	12	100	2	0.00212594	1	F5 Myo6
Rel	27490719	Gestational_age_at_birth_(child_effect)	7	177	2	0.00213706	1	Inpp5a Slc29a3
Elk3	28452372_26831199	Glomerular_filtration_rate_(creatinine)	60	261	5	0.00214101	1	Cacna1s Larp4b Skil Slc22a2 Ube2q2
Foxp2	24827717_28892062_20966902_24064335_24348519_20935630_28448500_25133637_18454148_20397748_27296613_23563607_22344219_28296344_23669352_23583978_17434869_25760438_25673413_26865924_24861553_19079260_19079261_25953783_26426971_22982992_28270201_19851299_22446040	Body_mass_index	235	97	6	0.00214171	1	Ablim3 Cadm1 Dgki Gpr101 Unc79 Zfhx3
Hic1	18159244_20421936_23563609	Obesity_(early_onset_extreme)	11	110	2	0.00214627	1	Ninj1 Prkch
Zfp385a	26634245	Post_bronchodilator_FEV1/FVC_ratio_in_COPD	46	96	3	0.00214887	1	Itga4 Sulf2 Wnt10a
Rora	17903302	Tonometry	9	136	2	0.00215398	1	Slc9a9 Syne1
Ikzf2	24124411	Liver_enzyme_levels_(aspartate_transaminase)	6	210	2	0.00215418	1	Celf2 Got1
Zfp641	28448500	Waist_circumference_adjusted_for_BMI_in_active_individuals	44	27	2	0.00215497	1	Adamtsl3 Lin28b
Litaf	27126917	Daytime_sleep_phenotypes	27	44	2	0.00215497	1	1700019D03Rik Chst15
Nfia	28540026	Autism_spectrum_disorder_or_schizophrenia	64	69	3	0.00216033	1	Fhit H2-Aa H2-DMb1
Fosb	25241763_20548946_28073927	Vertical_cup-disc_ratio	14	86	2	0.00216205	1	Exoc2 Rreb1
Rela	27989323	Interleukin-9_levels	10	122	2	0.00216301	1	Lmo7 Pard3b
Sall3	28443625	Waist_circumference_adjusted_for_BMI_in_non-smokers	35	34	2	0.00216582	1	Cdk6 Dnmt3a
Gli3	26390057_29403010_28548082_27618447_28739976_28135244_28270201_29615537_25249183_28498854_19430483_29208002_21909115_19430479_29212154_26969751	Diastolic_blood_pressure	119	131	5	0.0021671	1	Fes Pde1a Procr Slc39a8 Zfp831
Nfatc4	22293688_18587394_17554261_28067908_26891255_23850713_22412388_17554300_26192919_20570966_17684544_23266558_17435756_22936669_23128233_17804789_21102463_17447842_28008999	Crohn's_disease	113	138	5	0.00216919	1	Ccnd3 Fermt1 Il2ra Jak2 Plcl1
Gata3	29403010_19198610_27863252	Eosinophil_counts	104	150	5	0.00216994	1	Asb2 Chd7 Exoc2 Gata3 Pparg
Foxp1	27863252	Eosinophil_percentage_of_granulocytes	82	54	3	0.00217357	1	Brd3 Pparg Zfp365
Ikzf2	24351856_29403010_27588450_23535967	Glomerular_filtration_rate	45	210	4	0.00217381	1	Fap Phtf2 Rragd Slc22a2
Elf1	27863252	Platelet_distribution_width	101	306	7	0.0021751	1	Brd3 Cd226 Lrch1 Nrip1 Tlk1 Vav1 Zcwpw1
Rest	29403010_27863252_28017375_28453575_19862010_29615537	Hematocrit	76	302	6	0.00217523	1	Arhgef40 Cacna1c Egln1 Gprc5a Hk1 Pnpla3
Cebpb	28813576_26691988	Advanced_age-related_macular_degeneration	23	196	3	0.00218076	1	Abhd2 C3 Cnn2
Cebpb	28443625	Waist-to-hip_ratio_adjusted_for_BMI_(adjusted_for_smoking_behaviour)	23	196	3	0.00218076	1	Bcl2 Klf13 Smad6
Osr2	28540026	Autism_spectrum_disorder_or_schizophrenia	64	147	4	0.00218569	1	Cacnb2 Gramd1b H2-DMb2 H2-Eb1
Fosl1	29196614	Nodular_sclerosis_Hodgkin_lymphoma	5	259	2	0.00219159	1	Gata3 Lpp
Pou3f1	28158719_27863252_29403010	White_blood_cell_count_(basophil)	42	106	3	0.00219249	1	Helb Rufy4 Ryr1
Lef1	25811787	Urate_levels_(BMI_interaction)	6	212	2	0.00219483	1	Erap1 Map3k1
Nr1d2	29403010	Albumin-globulin_ratio	25	48	2	0.00219552	1	Il1r1 Nfkb1
Tcf7l1	25130324	Heschl's_gyrus_morphology	10	123	2	0.00219808	1	Cd28 Prkca
Maf	28644415	Western_dietary_pattern	8	613	3	0.0022052	1	Eea1 Esr1 Itpr1
Maf	29403010_22286170_27863252	Lymphocyte_counts	96	613	10	0.00220622	1	Arhgef3 Atp2b4 Ets1 Etv1 Ikbke Ikzf3 Jazf1 Ppard Rilpl2 Ssh2
Tcf7l2	26379185	Influenza_A_(H1N1)_infection	8	156	2	0.00220754	1	Dmd L3mbtl3
Zfp503	29875488_28240269	Blood_protein_levels	620	38	6	0.00220886	1	Atp1b2 C2 Ccrl2 Ntn4 Pdgfrb Vps37d
Zfp750	21531791_21827660_29743610_26424050_28346443_19578367_22886559	Glioma	15	81	2	0.0022098	1	D630023F18Rik Slc16a8
Nhlh1	19936222_22286219	Lipid_metabolism_phenotypes	15	81	2	0.0022098	1	Bcl3 Mlxipl
Zbtb1	29403010_27863252_28017375_28453575_19862010_29615537	Hematocrit	76	124	4	0.00221155	1	Egln1 Rgs14 Sbf2 Zfp641
Nr3c2	28928442_19349983_24162738_21750111_22004137	Hepatitis_B	14	87	2	0.00221189	1	Myo5b Upb1
Hdx	27918534_22589738_26480920_29178545	Subcutaneous_adipose_tissue	14	87	2	0.00221189	1	Mgat5 Pms1
Dzip1	29186694	Cognitive_ability	28	43	2	0.00221388	1	Dcc Ivd
Thap1	27189021_22158537_19401414_21647700_21347282_22961080_25483131_22456796_24509480_27362418_20862305_28406950_22238593_19056611_26818947_23209189_21490949_24390345_28254843_28869590_21799836_22885922_25102180_22693455_21573907_24101674_22101970_17293876_20581827_20418489_20174558_17554300_29621232_28566273_25760438_17463246_18711367_18711366_17463249_17463248_29358691_17668382_23937595_23945395_183…	Type_2_diabetes	115	82	4	0.00222005	1	Cenpw Jazf1 Rasgrp1 Tle1
Bach1	29403010	Albumin-globulin_ratio	25	181	3	0.00222227	1	Dab2 Ell2 Nfkb1
Arid3b	18997786_22286173_22961961_29531279_25256182_20364137	Intracranial_aneurysm	22	55	2	0.00222541	1	Fhit Hdac9
Rxra	17658951_22013104_23251661	Obesity-related_traits	351	381	17	0.00222641	1	Abcc9 Adcy5 Afap1l1 Auts2 Cadm1 Cdhr3 Cntnap2 Hmox1 Itpr1 Lhpp Mdga2 Otud7b Phtf2 Ptprn2 Radil Ryr2 Zfp536
Nfe2l2	21297633_24837172_26192919_28067908_23511034_19122664_19915572_20848476_25082827_23128233_20228798_20228799_19915573_28008999	Ulcerative_colitis	85	185	5	0.00223183	1	Cacna2d1 Il7r Nfkb1 Notch1 Ptpn2
Six5	29403010_21900944	Aspartate_aminotransferase_levels	17	271	3	0.00223259	1	Akna Cnnm1 Csf1
Ar	23612905_21900946_22922229_21841780	Graves'_disease	10	124	2	0.00223342	1	Slamf6 Tg
Sox4	19079262_26911590_26733130_27424934_18445777_19801982	Bone_mineral_density_(spine)	10	124	2	0.00223342	1	Esr1 Tnfrsf11a
Zbtb7b	22797727	Renal_function-related_traits_(sCR)	6	214	2	0.00223584	1	Rgs14 Shroom3
Plagl2	27386562_18941528_20453840_18997785_21654844_21244703_24076602_28445677_21833088_23412934_19010793_20598377_17660530_19525955_22457343_19525953_22190364	Multiple_sclerosis	102	44	3	0.00224711	1	Il2ra Vav2 Zbtb46
Ets2	28931804_24256812_24529757	Amyotrophic_lateral_sclerosis_(sporadic)	42	107	3	0.00225193	1	Nfatc2 Procr Unc13a
Satb1	28334935_25352340	Iron_status_biomarkers_(transferrin_saturation)	18	256	3	0.00225285	1	H2-Ab1 Sorcs2 Trf
Cic	25865494	Sitting_height_ratio	17	72	2	0.00225598	1	Nfatc2 Slc39a8
Cic	20596022_25608926	Alopecia_areata	17	72	2	0.00225598	1	Il2ra Lpp
Cic	23603761	Juvenile_idiopathic_arthritis_(oligoarticular_or_rheumatoid_factor-negative_polyarticular)	17	72	2	0.00225598	1	Fas Il2ra
Jun	23446634_23935956_23222517_23696099_20927387	Red_blood_cell_traits	25	390	4	0.00225663	1	Hk1 Rcl1 Thrb Tmprss6
Foxj1	29403010	Albumin-globulin_ratio	25	182	3	0.00225736	1	Hormad2 Il1r1 Traf3
Foxj1	28443625	Waist-to-hip_ratio_adjusted_for_BMI_(joint_analysis_main_effects_and_smoking_interaction)	7	182	2	0.00225766	1	Klf13 Pparg
Cebpg	25188341	Dementia_and_core_Alzheimer's_disease_neuropathologic_changes	7	182	2	0.00225766	1	Slco3a1 Smox
Vax2	23400010	Thiazide-induced_adverse_metabolic_effects_in_hypertensive_patients	24	190	3	0.00226271	1	Adam12 Jazf1 Mpzl3
Hoxd4	29499414	Lumbar_spine_bone_mineral_density	15	82	2	0.00226391	1	Osbpl2 Tnfrsf11a
Hic1	28334899_26763881	HDL_cholesterol_levels	41	110	3	0.0022727	1	Ccnd3 Pgs1 Stab1
Nfkb1	20639881_25279986	Follicular_lymphoma	5	264	2	0.00227586	1	Gramd1b Lpp
Nfkb2	23512250_29348612_23007406_19684603_19684604_22076464_25310577	Acute_lymphoblastic_leukemia_(childhood)	23	199	3	0.00227701	1	Aig1 Ddc Slco3a1
Pknox1	29403010	Hemoglobin_A1c_levels	16	77	2	0.00227871	1	Dusp9 Smg5
Sp4	21297633_24837172_26192919_28067908_23511034_19122664_19915572_20848476_25082827_23128233_20228798_20228799_19915573_28008999	Ulcerative_colitis	85	582	9	0.00228545	1	Cd28 Ets1 Il7r Litaf Nfkb1 Notch1 Procr Ptpn2 Rgs14
Meis1	27863252	Sum_eosinophil_basophil_counts	98	97	4	0.00228912	1	Larp4b Lpp Pten Zc3h7b
Six3	25524916	Glucose_homeostasis_traits	36	34	2	0.00229039	1	Dcc Rbm24
Zfp532	26049409_17553421_20885792_21390209_28714976_26339675_24162737_22881374_21379329_21460841_23571587_23565137	Alzheimer's_disease_(late_onset)	36	34	2	0.00229039	1	Cntnap2 Fermt2
Epas1	27863252	Eosinophil_percentage_of_granulocytes	82	116	4	0.0022911	1	Brd3 Klf3 Pparg Spsb1
Sp3	24578379	Plasma_plasminogen_activator_levels	5	265	2	0.0022929	1	Serpine1 Stx2
Stat4	25884002	Neutrophil_count_in_HIV-infection	5	265	2	0.0022929	1	Ifi204 Ifi205
Klf2	29403010_19198610_27863252	Eosinophil_counts	104	152	5	0.0022987	1	Bcl2l11 Kdm6b Pten Spsb1 Zfpm1
Elf1	27386562_18941528_20453840_18997785_21654844_21244703_24076602_28445677_21833088_23412934_19010793_20598377_17660530_19525955_22457343_19525953_22190364	Multiple_sclerosis	102	306	7	0.00230061	1	Ets1 Il2ra Ildr1 Ncoa2 Rgs14 Slc9a8 Stat4
Pou2af1	28584286	Cognitive_empathy	30	152	3	0.00230533	1	Atxn1 Igf2bp1 Mylk
Foxc1	27989323	Interleukin-7_levels	7	184	2	0.0023068	1	Atp6v0d2 Paqr8
Zbtb7a	27863252	Eosinophil_percentage_of_white_cells	88	180	5	0.00230702	1	Bcl3 Brd3 Chd7 Nfatc2 Trerf1
Fli1	27723756	Gut_microbiota_(beta_diversity)	9	141	2	0.00231273	1	Abhd2 Slc9a8
Atf3	28928442_29036319_25774636_26767831_20694014_24057671	Tuberculosis	34	285	4	0.00231314	1	Dusp14 Il23r Maf Rell1
Plagl2	20686608_27579533_25086665_19648918_22158540_29422604_23180869_20101243_26098869	Pancreatic_cancer	28	44	2	0.00231697	1	Sbf2 Tert
Sox21	26343387_29472232_29212778_21239051_29263402_24262325_26708285	Coronary_artery_disease	221	141	7	0.00232132	1	Coro6 Dab2ip Svep1 Tns1 Zfp652 Zfp827 Zhx3
Nfe2l2	20195514_23704328	Primary_tooth_development_(time_to_first_tooth_eruption)	7	185	2	0.00233155	1	Cacnb2 Msrb3
Zfp219	26068415	Amino_acid_levels	7	185	2	0.00233155	1	Gls2 Psph
Gata1	28158719_27863252_29403010	White_blood_cell_count_(basophil)	42	230	4	0.00234	1	Apbb1ip Fam53b Helb Rufy4
Xbp1	22019778_20018961_25642632_27976721	Leprosy	12	105	2	0.00234044	1	Ripk2 Rps6ka4
Nfat5	25130324	Heschl's_gyrus_morphology	10	127	2	0.00234107	1	Prkca Tnfaip8
Irf4	21297633_24837172_26192919_28067908_23511034_19122664_19915572_20848476_25082827_23128233_20228798_20228799_19915573_28008999	Ulcerative_colitis	85	822	11	0.00234172	1	Adad1 Cd28 Cyth1 Ergic1 Gpr35 Hdac9 Map3k8 Nfkb1 Notch1 Rorc Zfp831
Junb	28112199	B-cell_malignancies_(chronic_lymphocytic_leukemia,_Hodgkin_lymphoma_or_multiple_myeloma)_(pleiotropy)	11	115	2	0.00234267	1	Ell2 Gramd1b
Arntl2	29559693	Osteoarthritis_(self-reported)	11	115	2	0.00234267	1	Jph3 Nkain1
Erg	27490719_28877031	Gestational_age_at_birth_(maternal_effect)	5	268	2	0.00234438	1	Adcy5 Tgfbr3
Otx1	27863252	High_light_scatter_reticulocyte_percentage_of_red_cells	99	46	3	0.00234582	1	Pnkd Rimklb Thrb
Zfp641	28443625	Waist_circumference_adjusted_for_BMI_(adjusted_for_smoking_behaviour)	46	27	2	0.00235316	1	Adamtsl3 Lin28b
Foxo1	26974007	Chronic_inflammatory_diseases_(ankylosing_spondylitis,_Crohn's_disease,_psoriasis,_primary_sclerosing_cholangitis,_ulcerative_colitis)_(pleiotropy)	93	103	4	0.00235351	1	Ankrd55 Cd226 Ifih1 Zfp365
Foxc1	27863252	Plateletcrit	126	184	6	0.00235607	1	Bcl2 Cass4 Hdac9 Itpk1 Lhfpl2 Pnkd
Rreb1	27863252	Neutrophil_percentage_of_white_cells	59	163	4	0.00235831	1	Bcl2l11 Dnmt3a Slc35d1 Zfp36l2
Zbtb3	27386562_18941528_20453840_18997785_21654844_21244703_24076602_28445677_21833088_23412934_19010793_20598377_17660530_19525955_22457343_19525953_22190364	Multiple_sclerosis	102	94	4	0.00236168	1	Batf Galc Ifngr2 Traf3
Bach1	27863252	Eosinophil_percentage_of_white_cells	88	181	5	0.00236314	1	Bcl2a1a Dock3 Klf12 Nfkb1 Zfp652
Nfe2l2	29403010	Albumin-globulin_ratio	25	185	3	0.00236468	1	Bcl2 Dab2 Nfkb1
Arnt2	19936222_22286219	Lipid_metabolism_phenotypes	15	84	2	0.002374	1	Bcl3 Mlxipl
Hhex	22001757	Liver_enzyme_levels_(gamma-glutamyl_transferase)	15	84	2	0.002374	1	Cd276 Myo1b
Tal2	24827717_28892062_20966902_24064335_24348519_20935630_28448500_25133637_18454148_20397748_27296613_23563607_22344219_28296344_23669352_23583978_17434869_25760438_25673413_26865924_24861553_19079260_19079261_25953783_26426971_22982992_28270201_19851299_22446040	Body_mass_index	235	99	6	0.00237453	1	Cadm1 Calcr Dmxl2 Gpr101 Lpp Traf3
Bbx	27863252	High_light_scatter_reticulocyte_percentage_of_red_cells	99	97	4	0.00237533	1	Atxn1 Bmp7 Itga4 Tmc6
Ar	24001895_22763476_24903457_23972371_21572416_21909110_19114657_17903302_24954895	Blood_pressure	37	124	3	0.00237537	1	Fes Stk39 Zfp831
Nr4a2	27863252	Sum_eosinophil_basophil_counts	98	98	4	0.00237624	1	Cdk6 Ikzf2 Il4ra Nfkb1
Bhlhe41	25646338	Trans_fatty_acid_levels	19	66	2	0.00237697	1	Fads2 Lrch1
Irf8	25130324	Heschl's_gyrus_morphology	10	128	2	0.00237749	1	Cd28 Fbn2
Zfp524	29403010_23022100	Serum_total_protein_level	17	74	2	0.00238119	1	Ell2 Rcn3
L3mbtl3	18758464_26192919_28067908_17068223_27569725_23128233_28008999	Inflammatory_bowel_disease	130	74	4	0.00238167	1	Fermt1 Fosl2 Il23r Ipmk
Lef1	19656524_28054174_22419666_22863734_20023658	Orofacial_clefts	22	212	3	0.00239079	1	Acot12 Sema4d Thada
Maf	23263486_21983786_22179738_27899376_25967671_29453348_25646370	Gout	39	613	6	0.00239246	1	Abcc9 Abcg1 Jazf1 Nipal1 Ppard Slc13a3
Gabpa	25014791_21156761_20453842_21505073_20453841_19503088_17554300_28118524_18794853_24782177_23918589_24449572_21844665_21452313_23028356_23143596_22446963_24390342_17804836	Rheumatoid_arthritis	73	132	4	0.00239517	1	Il2rb Irf5 Nfkbie Ptpn2
Rreb1	27863252	Sum_eosinophil_basophil_counts	98	163	5	0.00240181	1	Bcl2l11 Kdm6b Klf3 Nfatc2 Rasgrp4
Zfp281	27863252	Sum_eosinophil_basophil_counts	98	238	6	0.00240333	1	Bcl2l11 Nfatc2 Pten Ptprc Runx1 Trerf1
Rfx1	23793025	Migraine_-_clinic-based	20	63	2	0.00240375	1	Casz1 Sv2c
Zfp523	27182965	Monobrow	20	63	2	0.00240375	1	Tcf25 Zfp608
Mafg	28928442	Bacterial_meningitis	13	98	2	0.00240541	1	Amz1 Slc6a9
Nr4a2	20585627_23548203_26926045	Hair_color	13	98	2	0.00240541	1	Irf4 Plxdc2
Rreb1	23726511	Post-traumatic_stress_disorder_(asjusted_for_relatedness)	8	163	2	0.00240684	1	Fam49b Ndrg1
Tfdp2	28199695	Mosquito_bite_size	60	21	2	0.00240746	1	Appl2 Zranb3
Hic1	20852631_22452962_20585626_22951594_19330030_23535733_17903305_25751625_25327703_24143190_25038754_17529967_29059683_21908515_27117709_23354978_28171663_29058716_23468962_18326623_21424380_22383897_23535729_20872241_19330027_20453838_25956309_22976474_27354352_21263130_17529974_17529973_25824743_22037553	Breast_cancer	286	110	7	0.00241852	1	Bcl2l11 Cdyl2 Itpr1 Lsp1 Nrip1 Ssbp4 Trim46
Sox12	29186694	Cognitive_ability	28	45	2	0.0024223	1	Dpp4 Exoc4
Mga	29403010_22286170_27863252	Lymphocyte_counts	96	48	3	0.00242879	1	Irf4 Klf3 Ptprc
Tcf3	27863252	Monocyte_percentage_of_white_cells	93	104	4	0.00243765	1	Ebf1 Itga4 Sh2d3c Slc9a3r1
Sp2	24625756	Serum_metabolite_levels	9	145	2	0.00244364	1	Gatm Slc6a13
Mesp2	27225129	Educational_attainment_(years_of_education)	67	19	2	0.00244849	1	Dcc Prpsap2
Atf6	24823311_26584805	Plasma_omega-6_polyunsaturated_fatty_acid_levels_(linoleic_acid)	13	99	2	0.00245396	1	Fads2 Il23r
Hmx3	21750679_21779181_28314753_20383147_24387989_29293537	Systemic_sclerosis	18	71	2	0.00246234	1	Ikzf2 Il12rb2
Klf2	27863252	Sum_basophil_neutrophil_counts	64	152	4	0.00246765	1	Atxn1 Ehd4 Fads2 Pnkd
Myc	27989323	Interleukin-4_levels	6	225	2	0.00246793	1	Trib3 Vgll4
Myc	27702941	Caffeine_metabolism_(plasma_1,7-dimethylxanthine_(paraxanthine)_to_1,3,7-trimethylxanthine_(caffeine)_ratio)	6	225	2	0.00246793	1	Ahr Clk3
Glis1	21107309_19721433_20195266_23241943	Response_to_antipsychotic_treatment	22	58	2	0.00247144	1	Slc26a9 Trpm1
Gata1	27386562_18941528_20453840_18997785_21654844_21244703_24076602_28445677_21833088_23412934_19010793_20598377_17660530_19525955_22457343_19525953_22190364	Multiple_sclerosis	102	230	6	0.00247938	1	Cd86 Cxcr5 Galc L3mbtl3 Rasgrp1 Stat4
Zic5	27863252	Sum_basophil_neutrophil_counts	64	20	2	0.00247956	1	Cdk6 Il1rn
Sp3	21909106_20861866_20385819_23577725_23326517_23455636_20385826_21665990_15761122_23536807_22694956	Age-related_macular_degeneration	18	265	3	0.00248522	1	Pla2g12a Rreb1 Tgfbr1
Stat4	21909106_20861866_20385819_23577725_23326517_23455636_20385826_21665990_15761122_23536807_22694956	Age-related_macular_degeneration	18	265	3	0.00248522	1	C3 Pla2g12a Tgfbr1
Stat4	27863252	Basophil_percentage_of_granulocytes	18	265	3	0.00248522	1	Bcl2 Chd7 Larp4b
Gli3	21221998_28886140_22081228_21326860_22446961_22446962_19132087	Kawasaki_disease	10	131	2	0.00248837	1	Fcgr3 Zfhx3
Jund	26112879	LDL_peak_particle_diameter_(total_fat_intake_interaction)	10	131	2	0.00248837	1	Ncald Sox5
Fosb	29198719	Lobe_attachment_(rater-scored_or_self-reported)	54	86	3	0.0024897	1	Atp8b4 Hdac9 Phldb2
Klf2	27863252	Reticulocyte_fraction_of_red_cells	106	152	5	0.00249778	1	Atxn1 Bcl2l11 Sema4d Tmc6 Zfpm1
Nfic	27863252	Reticulocyte_count	97	48	3	0.00250143	1	Ccnd3 Sema4d Tmc6
Rarg	25778476	Alzheimer's_disease_in_APOE_e4+_carriers	7	192	2	0.00250841	1	Pde1a Picalm
Irf9	28300201_29195075_17999355	Skin_pigmentation	16	81	2	0.00251779	1	Atp8b4 Slfn4
Zfp148	26426971	Waist-to-hip_ratio_adjusted_for_BMI_x_sex_x_age_interaction_(4df_test)	33	301	4	0.00252056	1	Bcl2 Klf13 Rfx7 Snx10
Klf3	25241763_20548946_28073927	Vertical_cup-disc_ratio	14	93	2	0.00252235	1	Hspa12a Rreb1
Homez	29494758_23273568_18204447_26502338_24871463_23053960_25862617_21044949_21408207_18204098_20169177_29848360_18204446_19165918_28714469_26606652_22291604_26663301_26316170_19838193_19838195_27399966	Systemic_lupus_erythematosus	147	32	3	0.00252899	1	Bank1 Irf5 Lpp
Nkx3-1	27899376	Renal_underexcretion_gout	6	228	2	0.00253314	1	Abcg2 Nipal1
Klf2	24816252	Blood_metabolite_ratios	31	152	3	0.00253593	1	Ivd Slc22a2 Zcwpw1
Foxp3	29494758_23273568_18204447_26502338_24871463_23053960_25862617_21044949_21408207_18204098_20169177_29848360_18204446_19165918_28714469_26606652_22291604_26663301_26316170_19838193_19838195_27399966	Systemic_lupus_erythematosus	147	110	5	0.00253864	1	Ccl22 Ikzf2 Ikzf3 Il10 Stat4
Srebf1	20705733_29403010_24068962_25972035_25886283_20661308	Calcium_levels	24	198	3	0.00254372	1	Casr Rgs14 Wdr81
Mef2b	28199695	Mosquito_bite_size	60	78	3	0.00254873	1	Auts2 Fgf2 Usp22
Zfp358	20884846_17997608_18834626_18327256_18327257_23263486_21768215_28270201_20139978_18179892	Urate_levels	34	38	2	0.00254947	1	Nrxn2 Slc48a1
Tef	22961000	Primary_biliary_cirrhosis	13	101	2	0.00255245	1	Il12rb2 Stat4
Stat1	25342443	Mammographic_density_(dense_area)	5	280	2	0.00255584	1	Lsp1 Tmem184b
Stat1	20639881_25279986	Follicular_lymphoma	5	280	2	0.00255584	1	Cd86 Lpp
Gata2	19182806_27797806_22764253	Essential_tremor	7	194	2	0.00256009	1	Lingo1 Slc1a2
Pou2f2	21546767	Dialysis-related_mortality	7	194	2	0.00256009	1	Sh3bp4 Tet3
Nr2f1	29083406	Allergic_disease_(asthma,_hay_fever_or_eczema)	51	92	3	0.00256064	1	Itpr3 Tnfrsf11a Zfp365
Batf3	22700719_28165464_18758461_21131588_23770605_24292274_26956414	Chronic_lymphocytic_leukemia	35	37	2	0.00256137	1	Bcl2 Fas
Gli3	28498854_22384028_17554300_21347282_27480026_19430479_28273873_19609347_27618447_25249183_21909115_21082022	Hypertension	36	131	3	0.00256478	1	Fes Slc39a8 Zfp831
Foxp3	23740937	Systemic_lupus_erythematosus_and_Systemic_sclerosis	12	110	2	0.00256479	1	Ikzf3 Stat4
Zbtb7b	29403010_27863252_28017375_28453575_19862010_29615537	Hematocrit	76	214	5	0.00256769	1	Hk1 Rgs14 Shroom3 Tmprss6 Vav2
Tcf7l2	29403010_19198610_27863252	Eosinophil_counts	104	156	5	0.0025728	1	Asb2 Bcl2a1b Il4ra Pparg Pten
Tbx21	22700719_28165464_18758461_21131588_23770605_24292274_26956414	Chronic_lymphocytic_leukemia	35	135	3	0.0025748	1	Arsb Bcl2l11 Gramd1b
Mga	27863252	Sum_eosinophil_basophil_counts	98	48	3	0.0025754	1	Bcl2l11 Klf3 Ptprc
Atf3	29403010_23022100	Serum_total_protein_level	17	285	3	0.00257606	1	Bcl2 Csf1 Ell2
Gata1	17903296	Hip_geometry	6	230	2	0.00257707	1	Dlg2 Tapbpl
Atf3	22700719_28165464_18758461_21131588_23770605_24292274_26956414	Chronic_lymphocytic_leukemia	35	285	4	0.00257801	1	Arsb Bank1 Bcl2 Fas
Six1	27863252	High_light_scatter_reticulocyte_count	112	145	5	0.00258727	1	Rimklb S1pr2 Sept9 Specc1 Tns1
Rbpj	22139419_27863252_19221038_22423221_19110211_24026423_19820697	Mean_platelet_volume	145	112	5	0.00258727	1	Arhgef3 Ehd3 Lrch1 Nfe2 Tcf12
Zfp369	23017229_27989323	Monocyte_chemoattractant_protein-1_levels	29	45	2	0.00259741	1	Ifi203 Mndal
Ascl4	23017229_27989323	Monocyte_chemoattractant_protein-1_levels	29	45	2	0.00259741	1	Fam198a Mndal
Zfp219	27863252	Eosinophil_percentage_of_white_cells	88	185	5	0.00259763	1	Ankrd33b Ikzf3 Kdm6b Klf3 Trerf1
Myb	25014791_21156761_20453842_21505073_20453841_19503088_17554300_28118524_18794853_24782177_23918589_24449572_21844665_21452313_23028356_23143596_22446963_24390342_17804836	Rheumatoid_arthritis	73	135	4	0.00259827	1	Cd226 Cdk6 Slc9a9 Ubash3a
Nr4a1	25014791_21156761_20453842_21505073_20453841_19503088_17554300_28118524_18794853_24782177_23918589_24449572_21844665_21452313_23028356_23143596_22446963_24390342_17804836	Rheumatoid_arthritis	73	135	4	0.00259827	1	Cdk6 Nfkbie Ptpn2 Rel
Foxq1	27863252	Lymphocyte_percentage_of_white_cells	76	62	3	0.0025994	1	Chd7 Ly9 Traf3
Cebpg	18758464_26192919_28067908_17068223_27569725_23128233_28008999	Inflammatory_bowel_disease	130	182	6	0.00260915	1	Crem Galc Ipmk Lpxn Stat4 Tm9sf4
Nfkb2	27863252	Eosinophil_percentage_of_granulocytes	82	199	5	0.0026155	1	Ankrd33b H2-Aa Nfkb1 Pparg Tnfsf8
Batf	26377243_28512139	Lipoprotein_(a)_levels	7	759	3	0.00262046	1	Igf2r Slc22a3 Sytl3
Ebf1	27863252	Immature_fraction_of_reticulocytes	73	224	5	0.00262169	1	Bcl2l11 Cav1 Rcl1 Riok3 Smox
Ebf1	25014791_21156761_20453842_21505073_20453841_19503088_17554300_28118524_18794853_24782177_23918589_24449572_21844665_21452313_23028356_23143596_22446963_24390342_17804836	Rheumatoid_arthritis	73	224	5	0.00262169	1	Acoxl Anxa3 Arhgef3 Il2ra Nfkbie
Maf	23603761	Juvenile_idiopathic_arthritis_(oligoarticular_or_rheumatoid_factor-negative_polyarticular)	17	613	4	0.00262378	1	Ccr3 Jazf1 Prr5l Stat4
Zic5	27863252	Sum_neutrophil_eosinophil_counts	66	20	2	0.00263455	1	Cdk6 Il1rn
Tbx21	27989323	Interleukin-6_levels	10	135	2	0.00263998	1	Cass4 Cdyl2
Sp9	23307926_19448619_22267201_26414677_24045676_29773799	Menopause_(age_at_onset)	51	93	3	0.00264051	1	Brsk1 Eif4ebp1 Helb
Foxo1	29403010_22286170_27863252	Lymphocyte_counts	96	103	4	0.00264142	1	Atp2b4 Ikzf3 Rilpl2 Ssh2
Foxb1	27021288_26184070	Oppositional_defiant_disorder_dimensions_in_attention-deficit_hyperactivity_disorder	8	171	2	0.00264472	1	Adam12 Sox5
Atf3	21829377_26584805	Plasma_omega-3_polyunsaturated_fatty_acid_levels_(docosahexaenoic_acid)	5	285	2	0.00264655	1	Elovl2 Vav3
Gli1	27386562_18941528_20453840_18997785_21654844_21244703_24076602_28445677_21833088_23412934_19010793_20598377_17660530_19525955_22457343_19525953_22190364	Multiple_sclerosis	102	97	4	0.00264731	1	Asap1 Batf Ncoa2 Zfp36l1
Rfx1	26390057_29403010	Mean_arterial_pressure	21	63	2	0.00265052	1	Casz1 Hdac4
Ikzf2	28813576_26691988	Advanced_age-related_macular_degeneration	23	210	3	0.00265249	1	Cnn2 Pbx2 Trpm1
Esr1	20585627_23548203_26926045	Hair_color	13	103	2	0.00265279	1	Irf4 Plxdc2
Foxo1	27723758	Selective_IgA_deficiency	13	103	2	0.00265279	1	Ifih1 Ikzf3
Ybx2	25811787	Urate_levels_in_overweight_individuals	12	112	2	0.00265728	1	Abcg2 Dlg2
Foxp1	27863252	Eosinophil_percentage_of_white_cells	88	54	3	0.00265788	1	Brd3 Pparg Zfp365
Mxi1	29403010_22558069	Non-albumin_protein_levels	33	145	3	0.00265946	1	Bcl2 Ebf1 Traf3
Srebf1	25188341	Dementia_and_core_Alzheimer's_disease_neuropathologic_changes	7	198	2	0.00266495	1	Slco3a1 Smox
Ppard	21507922_29403010_20172861_27863252_25096241	Neutrophil_count	80	124	4	0.00266678	1	Ccnd3 Ifitm2 Pnkd Psd3
Plagl1	27863252	Immature_fraction_of_reticulocytes	73	136	4	0.00266852	1	Itga4 S1pr2 Tmc6 Tmcc2
Npas2	29221444	Coronary_artery_calcified_atherosclerotic_plaque_(90_or_130_HU_threshold)_in_type_2_diabetes	26	51	2	0.00267621	1	Atxn1 Mtss1
E2f1	27863252	Neutrophil_percentage_of_granulocytes	77	129	4	0.00267717	1	Apbb1ip Larp4b Zc3h7b Zfp365
Sox13	27989323	Interleukin-9_levels	10	136	2	0.00267855	1	Pard3b Podn
Foxh1	18758464_26192919_28067908_17068223_27569725_23128233_28008999	Inflammatory_bowel_disease	130	126	5	0.00268767	1	Bsn Dnmt3b Fermt1 Gpr35 Litaf
Six1	22293688_18587394_17554261_28067908_26891255_23850713_22412388_17554300_26192919_20570966_17684544_23266558_17435756_22936669_23128233_17804789_21102463_17447842_28008999	Crohn's_disease	113	145	5	0.002689	1	Fermt1 Gpr65 Ifngr2 Map3k8 Stat4
Msx2	26390057_29403010_28135244_27618447_28739976_28498854	Pulse_pressure	77	62	3	0.00269789	1	Fbn1 Fn1 Inpp5b
Tead1	22566634	Economic_and_political_preferences_(time)	5	288	2	0.00270171	1	Dlgap1 Neto1
Tead1	26879886	Low_high_density_lipoprotein_cholesterol_levels	5	288	2	0.00270171	1	Abca1 Plcl1
Jdp2	28928442	Bacterial_meningitis	13	104	2	0.00270366	1	Col23a1 Slc6a9
Hhex	25625606_19668339_22745009	Hippocampal_atrophy	16	84	2	0.00270455	1	Col18a1 Efna5
Gata2	28881265_27506219_23104006_23472165_28537267_28333195_20601957	Endometriosis	25	194	3	0.00270554	1	D430041D05Rik Esr1 Gpnmb
Zic5	27863252	Granulocyte_count	67	20	2	0.00271373	1	Cdk6 Il1rn
Gfi1	27863252	Granulocyte_count	67	149	4	0.00271451	1	Chd7 Glcci1 Plaur S1pr2
Zfp711	27863252	High_light_scatter_reticulocyte_count	112	89	4	0.0027182	1	Bmp7 Itga4 S1pr2 Smox
Bcl6	25352340	Iron_status_biomarkers_(transferrin_levels)	5	289	2	0.00272021	1	Fads2 Tmprss6
Smad4	23284291	Pulmonary_function_(smoking_interaction)	22	61	2	0.00272974	1	Adam19 Padi3
Foxa1	20150558_27989323	Interleukin-18_levels	22	61	2	0.00272974	1	Il18 Xdh
Foxa1	22138694_21743469_20062062_23749187	Ankylosing_spondylitis	22	61	2	0.00272974	1	Antxr2 Fcgr3
Rel	27863252	Monocyte_percentage_of_white_cells	93	177	5	0.00273035	1	Bcl2a1b Bcl2a1d Nfkb1 Nfkbie Rpn1
Rel	26974007	Chronic_inflammatory_diseases_(ankylosing_spondylitis,_Crohn's_disease,_psoriasis,_primary_sclerosing_cholangitis,_ulcerative_colitis)_(pleiotropy)	93	177	5	0.00273035	1	Ets1 Ifngr2 Il2ra Nfkb1 Smad3
Runx2	27863252	Eosinophil_percentage_of_granulocytes	82	201	5	0.00273077	1	Bcl2a1b Bcl2a1d Klf3 Runx1 Trerf1
Maf	25574825_18364390_25903422_23143594_18369459_25939698_28537254_20953188_20953189_19169255_19169254_20953190	Psoriasis	40	613	6	0.00273137	1	Ets1 Ifih1 Ikbke Il13 Il23r Rps6ka4
Gata1	29403010_19198610_27863252	Eosinophil_counts	104	230	6	0.00273316	1	Apbb1ip Asb2 Auh Gata3 Ikzf3 Nfkb1
Zic2	29403010_22286170_27863252	Lymphocyte_counts	96	104	4	0.00273549	1	Arhgef3 Bcl2 Lta Rreb1
Sox5	25014791_21156761_20453842_21505073_20453841_19503088_17554300_28118524_18794853_24782177_23918589_24449572_21844665_21452313_23028356_23143596_22446963_24390342_17804836	Rheumatoid_arthritis	73	137	4	0.00274006	1	Cdk6 Gata3 Stat4 Ubash3a
Meis1	27918534_22589738_26480920_29178545	Subcutaneous_adipose_tissue	14	97	2	0.00274013	1	Lhpp Nr3c2
Rara	27863252	Granulocyte_percentage_of_myeloid_white_cells	90	111	4	0.00274027	1	Ank1 Foxo1 Itga4 Kdm6b
Pou2f2	21297633_24837172_26192919_28067908_23511034_19122664_19915572_20848476_25082827_23128233_20228798_20228799_19915573_28008999	Ulcerative_colitis	85	194	5	0.00274118	1	Cd226 Cd28 Hormad2 Map3k8 Ptpn2
Runx2	26853712	Craniofacial_microsomia	7	201	2	0.00274492	1	Agap1 Nid2
Runx2	26174813	Attention_function_in_attention_deficit_hyperactive_disorder	7	201	2	0.00274492	1	Dlg2 Sorcs2
Sox6	24351856_29403010_27588450_23535967	Glomerular_filtration_rate	45	107	3	0.00274623	1	Nfatc1 Slc13a3 Sox5
Klf2	27863252	Sum_neutrophil_eosinophil_counts	66	152	4	0.00276129	1	Atxn1 Ehd4 Glcci1 Pnkd
Elk3	28193307_29403010_27863252_23314186_25096241	Monocyte_count	92	261	6	0.0027659	1	Dusp14 Gcnt2 Pnkd Rreb1 Slc9a3r1 Treml2
Bcl11b	23544013_29058716	Breast_Cancer_in_BRCA1_mutation_carriers	8	175	2	0.00276768	1	Ncoa1 Tert
Egr2	18758464_26192919_28067908_17068223_27569725_23128233_28008999	Inflammatory_bowel_disease	130	316	8	0.00278006	1	Dnmt3b Ergic1 Galc Gpr65 Rorc Skap2 Stat4 Tm9sf4
Zeb2	23259602_21940522_23064961	Dental_caries	26	52	2	0.00278068	1	Exoc2 Rps6ka2
Cebpb	29403010	Albumin-globulin_ratio	25	196	3	0.0027852	1	Bcl2 Ell2 Tbc1d16
Nr4a2	28928442_19349983_24162738_21750111_22004137	Hepatitis_B	14	98	2	0.00279592	1	Cacna1c Upb1
Sp6	28443625	Waist_circumference_adjusted_for_BMI_in_non-smokers	35	139	3	0.00279677	1	Cdk6 Dock3 Myo1f
Irf1	26974007	Chronic_inflammatory_diseases_(ankylosing_spondylitis,_Crohn's_disease,_psoriasis,_primary_sclerosing_cholangitis,_ulcerative_colitis)_(pleiotropy)	93	178	5	0.00279746	1	Crem Erap1 Prdm1 Ptpn2 Rorc
Pou3f1	25811787	Urate_levels_in_obese_individuals	13	106	2	0.00280676	1	Abcg2 Myo3b
Irf8	23722424_27046643_25201988	Educational_attainment	38	128	3	0.00280697	1	Cep170 Dpp4 Itpr3
Fosl1	27863252	Monocyte_percentage_of_white_cells	93	259	6	0.00281092	1	Cdk6 Eif4e3 Itga4 Kdm6b Lpp Lsp1
Bbx	21057379_22688191_20889312	Bipolar_disorder_and_schizophrenia	50	97	3	0.0028117	1	Efna5 Rin2 Sptlc1
Nfatc4	25014791_21156761_20453842_21505073_20453841_19503088_17554300_28118524_18794853_24782177_23918589_24449572_21844665_21452313_23028356_23143596_22446963_24390342_17804836	Rheumatoid_arthritis	73	138	4	0.00281291	1	Arhgef3 Cd226 Il2ra Prkch
Stat3	29083406	Allergic_disease_(asthma,_hay_fever_or_eczema)	51	479	6	0.00281542	1	Foxo1 Lpp Plcl1 Rora Rorc Smad3
Prdm8	18997786_22286173_22961961_29531279_25256182_20364137	Intracranial_aneurysm	22	62	2	0.00281855	1	Ccdc80 Hdac9
Klf9	25877299_26503584_19483681_23666240_28604732_23666239_28604728	Testicular_germ_cell_tumor	34	40	2	0.00282173	1	Gab2 Rfwd3
Foxo3	18758464_26192919_28067908_17068223_27569725_23128233_28008999	Inflammatory_bowel_disease	130	185	6	0.00282978	1	Il10 Il18r1 Impg2 Ipmk Ptpn2 Tnfsf15
Plagl2	19836008_22797724_20700438_28604730_20871597_27393504	Lung_adenocarcinoma	31	44	2	0.00283641	1	Sbf2 Tert
Bcl6	26390057_29403010_28135244_27618447_28739976_29212154_29615537_25249183_28498854_19430483_29208002_21909115_19430479_26969751	Systolic_blood_pressure	112	289	7	0.00283724	1	Anln Fes Furin Nfkbia Nucb2 Rapsn Slc39a8
Tal2	27989323	Hepatocyte_growth_factor_levels	14	99	2	0.00285224	1	Cacna2d1 Serpine2
Irf2	22139419_27863252_19221038_22423221_19110211_24026423_19820697	Mean_platelet_volume	145	223	7	0.00285586	1	Arhgef3 Asap1 Bank1 Eml6 Lrch1 Tbc1d14 Tcf12
Sox6	24386095_24023261_24023260	Lipid_traits	13	107	2	0.00285901	1	Lpl Ryr2
Irf7	29494758_23273568_18204447_26502338_24871463_23053960_25862617_21044949_21408207_18204098_20169177_29848360_18204446_19165918_28714469_26606652_22291604_26663301_26316170_19838193_19838195_27399966	Systemic_lupus_erythematosus	147	164	6	0.00286868	1	C2 Ifih1 Il12rb2 Irf7 Notch2 Slc29a3
Zfp182	27863252	Reticulocyte_fraction_of_red_cells	106	157	5	0.00287259	1	Arhgef3 Atxn1 Bzw2 Tmcc2 Trps1
Sgsm2	23612905_21900946_22922229_21841780	Graves'_disease	10	141	2	0.00287541	1	Prickle1 Tg
Nfia	27182965	Monobrow	20	69	2	0.00287542	1	Irf4 Zfp608
Patz1	29403010_22286170_27863252	Lymphocyte_counts	96	51	3	0.0028893	1	Bcl2 Il2ra Lta
Zfp280b	22883433_20185149_18347602_23212062_19571808_23894747_18677311_28991256_18282107_25056061_21926974_22688191_19571811_18332876_21682944_26198764_21679298_23974872_27922604_24043878_22037555_23358160_26531332_22885689_22037552_23142968	Schizophrenia	322	101	7	0.00289065	1	Adam10 Adamtsl3 Cacna1c Furin Rtn1 Sox5 Tacc2
Foxn2	25014791_21156761_20453842_21505073_20453841_19503088_17554300_28118524_18794853_24782177_23918589_24449572_21844665_21452313_23028356_23143596_22446963_24390342_17804836	Rheumatoid_arthritis	73	67	3	0.0028913	1	Acoxl D1Ertd622e Rasgrp1
Hdx	28928442	Chronic_sinus_infection	16	87	2	0.00289768	1	Cntnap2 Vgll4
Hdx	24514567_21079607_23568457_28494655	Anorexia_nervosa	16	87	2	0.00289768	1	Sorcs2 Vgll4
Glis2	24097068_27036123_23067351_26582766_23726366_26780889_18193044_21059979_19060910_19060911_25961943_21347282_20686565_20864672_19060906_18179892_18193043	LDL_cholesterol	59	83	3	0.00289851	1	Ar Nynrin Rnf130
Nr1d1	28470677	Survival_in_pancreatic_cancer	15	93	2	0.00290019	1	Il17f Kcnk10
Stat1	21750679_21779181_28314753_20383147_24387989_29293537	Systemic_sclerosis	18	280	3	0.00290471	1	Ikzf2 Il12rb2 Sox5
Nfat5	21507922_29403010_20172861_27863252_25096241	Neutrophil_count	80	127	4	0.00290715	1	Ccdc125 Ehd4 Il1rn Stxbp6
Atf3	24097068_27036123_23067351_26582766_23726366_26780889_18193044_21059979_19060910_19060911_25961943_21347282_20686565_20864672_19060906_18179892_18193043	LDL_cholesterol	59	285	5	0.00290751	1	Ar Hmgcr Nynrin Rnf130 Vldlr
Stat5b	21107309_19721433_20195266_23241943	Response_to_antipsychotic_treatment	22	63	2	0.00290871	1	Fhod3 Ppard
Tcf12	29146897_18849991_22693459_27182965	Male-pattern_baldness	23	217	3	0.00291026	1	Cenpw Fam53b Thada
Egr2	27863252	Neutrophil_percentage_of_granulocytes	77	316	6	0.00291158	1	Bcl2l11 Ikzf3 Pten Runx1 Tnfsf8 Zfp36l2
Hoxd4	29499414	Femoral_neck_bone_mineral_density	17	82	2	0.00291423	1	Osbpl2 Tnfrsf11a
Klf2	27863252	Granulocyte_count	67	152	4	0.00291671	1	Atxn1 Ehd4 Glcci1 Pnkd
Zbtb7a	23459443	QT_interval_(drug_interaction)	8	180	2	0.00292515	1	Crebbp Fastkd2
Smad3	28416818	Prevalent_atrial_fibrillation	5	300	2	0.00292782	1	Anxa4 Zfhx3
Smad3	29531354_26708676	Ischemic_stroke_(cardioembolic)	5	300	2	0.00292782	1	Cav2 Zfhx3
Foxj1	28193307_29403010_27863252_23314186_25096241	Monocyte_count	92	182	5	0.00293712	1	Acvrl1 Ankrd55 Ccr3 Slc2a1 Ssh2
Nkx3-1	18464913	Protein_quantitative_trait_loci	22	228	3	0.00293783	1	Cacnb2 Dlg2 Fam49b
Cenpt	27863252	Eosinophil_percentage_of_granulocytes	82	60	3	0.00293787	1	Cog6 Rad52 Zfp652
Zfp148	22922229	Autoimmune_thyroid_diseases_(Graves_disease_or_Hashimoto's_thyroiditis)	5	301	2	0.00294706	1	Il2ra Lpp
Nr4a2	29403010_19198610_27863252	Eosinophil_counts	104	98	4	0.00294734	1	Cdk6 Ikzf2 Il4ra Nfkb1
Zeb1	27863252	Sum_eosinophil_basophil_counts	98	171	5	0.00295387	1	Cd200r1 Cog6 Dock3 Lpp Smad3
Etv5	22120009_23955597_26007630_27363682	Multiple_myeloma	20	70	2	0.00295793	1	Ell2 Mxi1
Zfp64	24351856_29403010_27588450_23535967	Glomerular_filtration_rate	45	31	2	0.00296501	1	Shroom3 Ube2q2
Tef	21151127_27992413	Primary_sclerosing_cholangitis	14	101	2	0.00296649	1	Cd226 Inpp5a
Ar	22293688_18840781_17554260_17554300_19966805_18198356_25751624_17632545_21829393_18978792_21980299_19430480	Type_1_diabetes	40	124	3	0.00297338	1	Il7r Ptpn2 Rasgrp1
Patz1	27863252	Reticulocyte_count	97	51	3	0.00297532	1	Bcl2 Hbs1l Iqgap2
Etv2	27846195	Response_to_paliperidone_in_schizophrenia_(PANSS_score)	19	74	2	0.00297739	1	Prlr Tox
Sox21	26390057_29403010_28548082_27618447_28739976_28135244_28270201_29615537_25249183_28498854_19430483_29208002_21909115_19430479_29212154_26969751	Diastolic_blood_pressure	119	141	5	0.00298093	1	Eml6 Pde10a Prex1 Tns1 Zfp652
Foxa1	23512250_29348612_23007406_19684603_19684604_22076464_25310577	Acute_lymphoblastic_leukemia_(childhood)	23	61	2	0.00298291	1	Pygl Slco3a1
Fosl1	27863252	Plateletcrit	126	259	7	0.00298898	1	Dip2b Ehd3 Itpk1 Lhfpl2 Mylk2 Rcl1 Zcwpw1
Srebf2	28644415	Western_dietary_pattern	8	182	2	0.0029893	1	Esr1 Itpr1
Foxj1	28443625	Waist-to-hip_ratio_adjusted_for_BMI_in_non-smokers	8	182	2	0.0029893	1	Klf13 Pparg
Ikzf2	20708005	Non-alcoholic_fatty_liver_disease_histology_(lobular)	7	210	2	0.00299164	1	Cacna2d1 Slc9a9
Ikzf2	28394258	Left_ventricle_wall_thickness	7	210	2	0.00299164	1	Cntnap2 Runx2
Stat3	27182965	Allergy	11	479	3	0.00299629	1	Lpp Plcl1 Smad3
Nfe2	29531354_26708676	Ischemic_stroke_(cardioembolic)	5	304	2	0.00300514	1	Cav2 Zfhx3
Nfe2	23006423	Response_to_taxane_treatment_(docetaxel)	5	304	2	0.00300514	1	Cacna2d1 Ryr2
Tcf4	27863252	Lymphocyte_percentage_of_white_cells	76	135	4	0.00300789	1	H2-Ab1 Nfkb1 Traf3 Zfp36l2
Bcl6	26049409_17553421_20885792_21390209_28714976_26339675_24162737_22881374_21379329_21460841_23571587_23565137	Alzheimer's_disease_(late_onset)	36	289	4	0.00301011	1	Abi3 Celf2 Gab2 Sorl1
Six1	29617998_24518671_25637523_22570627_29235454_24002674_28073927_25173106	Intraocular_pressure	116	145	5	0.00301161	1	Aldh3a1 Fmnl2 Ltbp1 Sept9 Tns1
Erg	23322567_22144915_23761726_29422769	Corneal_astigmatism	19	268	3	0.00301215	1	Lmo7 Smpdl3b Tnr
Foxp3	21383967	Celiac_disease_or_Rheumatoid_arthritis	13	110	2	0.00301849	1	Ptpn2 Stat4
Foxp3	27723758	Selective_IgA_deficiency	13	110	2	0.00301849	1	Ikzf3 Ptpn2
Klf10	23000144_26394269_21399635_28062665_19458352_20639880_28425483	Primary_biliary_cholangitis	32	44	2	0.0030206	1	Rps6ka4 Stat4
Tead1	21297633_24837172_26192919_28067908_23511034_19122664_19915572_20848476_25082827_23128233_20228798_20228799_19915573_28008999	Ulcerative_colitis	85	288	6	0.00302538	1	Ets1 Gpr65 Il23r Plcl1 Ptprc Sema6d
Zfp612	29228715	Colonoscopy-negative_controls_vs_population_controls	47	30	2	0.00302715	1	Dock1 Ryr2
Ahrr	26528553	Gut_microbiome_composition_(summer)	16	89	2	0.00302995	1	Gli3 Myof
Rest	29403010_21900944	Aspartate_aminotransferase_levels	17	302	3	0.00303519	1	B4galt1 Pnpla3 Zfp827
Stat4	27863252	Sum_basophil_neutrophil_counts	64	265	5	0.00303815	1	Atxn1 Cdk6 Chd7 Nlrp3 Rbpms
Pou2af1	29403010_22558069	Non-albumin_protein_levels	33	152	3	0.00303867	1	Bcl2 Dusp5 Fads2
Prrx1	28199695	Itch_intensity_from_mosquito_bite	33	152	3	0.00303867	1	Adam12 Mctp2 Sox13
Zic5	27863252	Myeloid_white_cell_count	71	20	2	0.00304155	1	Cdk6 Il1rn
Elf1	25884002	Neutrophil_count_in_HIV-infection	5	306	2	0.00304416	1	Ifi203 Ifi204
Lef1	28443625	Waist-to-hip_ratio_adjusted_for_BMI_(joint_analysis_main_effects_and_smoking_interaction)	7	212	2	0.00304785	1	Ccdc92 Klf13
Xbp1	27863252	Sum_eosinophil_basophil_counts	98	105	4	0.00305087	1	Exoc2 Nfatc2 Tbx6 Zc3h7b
Prdm1	23544013_29058716	Breast_Cancer_in_BRCA1_mutation_carriers	8	184	2	0.00305412	1	Tcf7l2 Tert
Foxc1	26379185	Influenza_A_(H1N1)_infection	8	184	2	0.00305412	1	Atad2b Dmd
Isl2	26390057_29403010_28135244_27618447_28739976_29212154_29615537_25249183_28498854_19430483_29208002_21909115_19430479_26969751	Systolic_blood_pressure	112	92	4	0.00306471	1	Afap1l2 Casz1 Hspb7 Lsp1
Foxj1	26974007	Chronic_inflammatory_diseases_(ankylosing_spondylitis,_Crohn's_disease,_psoriasis,_primary_sclerosing_cholangitis,_ulcerative_colitis)_(pleiotropy)	93	182	5	0.00307788	1	Ankrd55 Bsn Erap1 Il1r1 Thada
Foxo1	21151127_27992413	Primary_sclerosing_cholangitis	14	103	2	0.00308287	1	Cd226 Inpp5a
Irf4	19836008_22797724_20700438_28604730_20871597_27393504	Lung_adenocarcinoma	31	822	6	0.00308536	1	Cntln Irf4 Lpcat1 Mpzl2 Ncoa1 Sbf2
Rara	26974007	Chronic_inflammatory_diseases_(ankylosing_spondylitis,_Crohn's_disease,_psoriasis,_primary_sclerosing_cholangitis,_ulcerative_colitis)_(pleiotropy)	93	111	4	0.00308539	1	Ets1 Ifih1 Rorc Ubash3a
Foxo3	26379185	Influenza_A_(H1N1)_infection	8	185	2	0.00308678	1	Dlg2 L3mbtl3
Foxo3	22566498	Response_to_angiotensin_II_receptor_blocker_therapy	8	185	2	0.00308678	1	Apbb1ip Slc9a9
Foxo3	23726511	Post-traumatic_stress_disorder_(asjusted_for_relatedness)	8	185	2	0.00308678	1	Ndrg1 Zmat3
Nfe2l2	28644415	Western_dietary_pattern	8	185	2	0.00308678	1	Esr1 Kcnq5
Zfp219	28394258	Left_atrial_antero-posterior_diameter	8	185	2	0.00308678	1	Dab2ip Itgb3
Irf4	27863252	Eosinophil_percentage_of_white_cells	88	822	11	0.00308754	1	Asb2 Bcl2 Bcl2l11 Dock3 Exoc2 Ikzf2 Kdm6b Nfkb1 Pten Tnfsf8 Zfpm1
Rora	29403010_27863252_28017375_28453575_19862010_29615537	Hematocrit	76	136	4	0.0030888	1	Met Mitf Stab1 Trps1
Nfkb1	27863252	Monocyte_percentage_of_white_cells	93	264	6	0.00308921	1	Acoxl Ccnd3 Cdk6 Itga4 Lpp Nfkb1
Npas2	20686608_27579533_25086665_19648918_22158540_29422604_23180869_20101243_26098869	Pancreatic_cancer	28	51	2	0.00310089	1	Sbf2 Tns4
Bhlha15	28928442	Pneumonia	28	51	2	0.00310089	1	Tnfrsf1a Tns4
Zbtb7b	19820697	Hematological_parameters	7	214	2	0.00310455	1	Ccnd3 Tmprss6
Crem	29403010_27863252_28017375_28453575_19862010_29615537	Hematocrit	76	66	3	0.00310568	1	Gprc5a Pfas Tmprss6
Sall3	28443625	Waist_circumference_adjusted_for_BMI_(joint_analysis_main_effects_and_smoking_interaction)	42	34	2	0.00310707	1	Cdk6 Dnmt3a
Foxf2	23717212_22895189_19465909	Malaria	6	253	2	0.00310833	1	Atp2b4 Myh3
Rreb1	29403010_19198610_27863252	Eosinophil_counts	104	163	5	0.00310848	1	Bcl2l11 Ikzf3 Kdm6b Klf3 Rasgrp4
Mitf	26974007	Chronic_inflammatory_diseases_(ankylosing_spondylitis,_Crohn's_disease,_psoriasis,_primary_sclerosing_cholangitis,_ulcerative_colitis)_(pleiotropy)	93	54	3	0.00310854	1	Ern1 Fndc3a Il1r1
Sox6	29228715	Colonoscopy-negative_controls_vs_population_controls	47	107	3	0.00311005	1	Dlg2 Kcnc2 Ryr2
Rorc	22293688_18587394_17554261_28067908_26891255_23850713_22412388_17554300_26192919_20570966_17684544_23266558_17435756_22936669_23128233_17804789_21102463_17447842_28008999	Crohn's_disease	113	371	8	0.00311193	1	Gpr65 Il23r Impg2 Jazf1 Nod2 Ptpn2 Rorc Sbno2
Irf7	24347629_26962152	Periodontal_disease-related_phenotypes	9	164	2	0.0031124	1	Ifi203 Ifi204
Dmrt1	27863252	Basophil_percentage_of_granulocytes	18	80	2	0.00311379	1	Chd7 Grip1
Elk3	27863252	Plateletcrit	126	261	7	0.00311882	1	Fam160a1 Hdac9 Itpk1 Pnkd Rbpms Rcl1 Ston2
Tcf7l1	25673412_26785701_28448500_28270201_28430825_27195708	Waist-to-hip_ratio_adjusted_for_body_mass_index	41	123	3	0.00311931	1	Ccdc92 Dnm3 Klf13
Hsf1	27046643_21130836_25869804	Information_processing_speed	13	112	2	0.0031271	1	Atrnl1 Pknox1
Ybx2	23583980_21787189	Interstitial_lung_disease	13	112	2	0.0031271	1	Atp11a Muc2
Zkscan1	29403010_21900944	Aspartate_aminotransferase_levels	17	85	2	0.00312728	1	Cnnm1 Csf1
Zfp263	27863252	Sum_eosinophil_basophil_counts	98	251	6	0.00312784	1	Apbb1ip Auh Bcl2 Ptprc Trerf1 Zfpm1
Irf4	27863252	Platelet_distribution_width	101	822	12	0.00313681	1	Abcd3 Dock10 Fam46c Grk5 Hemgn Nck2 Nrip1 Rin2 Snx9 Tesk2 Tmcc2 Zfp831
Pou5f2	28443625	Waist_circumference_adjusted_for_BMI_in_non-smokers	35	41	2	0.00313761	1	Kctd19 Loxl1
Trp53	22449649_28530673	Intelligence	14	104	2	0.00314186	1	Exoc4 Zfp365
Myt1l	29255261_27089181_23229837_27918536_20634892_25993607_29292387_17667963_18762592_27067015	Neuroticism	103	49	3	0.00314534	1	Arpp21 Dcc Kcnc2
Ascl2	17903302	Tonometry	9	165	2	0.00314973	1	Exoc4 Slc9a9
Ascl2	27723756	Gut_microbiota_(beta_diversity)	9	165	2	0.00314973	1	Abhd2 Bank1
Sox5	19734545_20125193	Cognitive_performance	37	137	3	0.00315007	1	Ncald Nrip1 Tbc1d30
Nr4a2	27863252	Reticulocyte_fraction_of_red_cells	106	98	4	0.00315685	1	Ehd3 Fam46c Tmc6 Tmcc2
Sgsm2	29186694	Cognitive_ability_(MTAG)	36	141	3	0.0031579	1	Exoc4 Ivd Sema6d
Fli1	26049409_17553421_20885792_21390209_28714976_26339675_24162737_22881374_21379329_21460841_23571587_23565137	Alzheimer's_disease_(late_onset)	36	141	3	0.0031579	1	Abi3 Ahnak Sorl1
Tbx21	27863252	Plateletcrit	126	135	5	0.00316259	1	Cass4 Hemgn Mylk2 P2ry2 Pnkd
Runx1	27680694_20372150_23202124	Birth_weight	29	176	3	0.00316375	1	Abcc9 Esr1 Igf2bp3
Zeb1	27082954	Peripheral_arterial_disease_(traffic-related_air_pollution_interaction)	61	171	4	0.00316623	1	Cog6 Mctp1 Paqr8 Rilpl2
Etv4	29531354_17434096_26089329_22306652_19369658	Stroke	21	69	2	0.00316988	1	Cdk6 Ptprf
Batf	27863252	Eosinophil_percentage_of_granulocytes	82	759	10	0.00319379	1	Asb2 Auh Bcl2a1d Bcl2l11 Ikzf2 Klf3 Lpp Pten Spsb1 Zfp365
Tcf7l1	22424883	Pulmonary_function_decline	12	123	2	0.00319382	1	Agl Cntln
Tcf7l1	23740937	Systemic_lupus_erythematosus_and_Systemic_sclerosis	12	123	2	0.00319382	1	Ikzf3 Samd9l
Lyl1	27918534_22589738_26480920_29178545	Subcutaneous_adipose_tissue	14	105	2	0.00320138	1	Mgat5 Rora
Fosb	27863252	Neutrophil_percentage_of_white_cells	59	86	3	0.00320509	1	Ank1 Bcl2l11 Plaur
Irf1	29403010_22286170_27863252	Lymphocyte_counts	96	178	5	0.00320962	1	Acoxl Nlrc5 Rreb1 S1pr1 Ssh2
Nfkb1	22293688_18840781_17554260_17554300_19966805_18198356_25751624_17632545_21829393_18978792_21980299_19430480	Type_1_diabetes	40	264	4	0.00321066	1	Acoxl Capsl Il7r Ptpn2
Sp140	25014791_21156761_20453842_21505073_20453841_19503088_17554300_28118524_18794853_24782177_23918589_24449572_21844665_21452313_23028356_23143596_22446963_24390342_17804836	Rheumatoid_arthritis	73	20	2	0.0032121	1	Irf5 Stat4
Spib	19779542_23406873_21640322_21095009_22685421_23049088	Myopia_(pathological)	26	198	3	0.00321293	1	Fhit Parp8 Srpk2
Nfic	27863252	Reticulocyte_fraction_of_red_cells	106	48	3	0.00321617	1	Ccnd3 Sema4d Tmc6
Foxb1	28453575_27863252	Red_cell_distribution_width	100	171	5	0.00322325	1	Atp11a Dip2b Hbs1l Itsn1 Tmprss6
Foxc1	27863252	Monocyte_percentage_of_white_cells	93	184	5	0.00322546	1	Bcl2 Cxcl5 Dock10 Pik3ap1 Tbc1d14
Plagl1	26390057_29403010_28135244_27618447_28739976_28498854	Pulse_pressure	77	136	4	0.00323836	1	Cep68 Fn1 Gsn S1pr2
Bcl11b	22899653_26732429_21725308_18780872_24880342_18978790_23143601_18978787_19654303_28604730_18385738_27393504_20304703_18385676	Lung_cancer	60	175	4	0.00323936	1	Ddr1 Ncoa1 Tert Trim26
Egr2	28441456	Facial_morphology_(factor_12,_vertical_position_of_sublabial_sulcus_relative_to_central_midface)	5	316	2	0.00324291	1	Hdac9 Nfatc1
Smad4	20173748_25584925_22080838_29394082_19300482_25241909_28166215_25101718	Chronic_obstructive_pulmonary_disease	24	61	2	0.00324668	1	Adam19 Dlg2
Cenpt	21297633_24837172_26192919_28067908_23511034_19122664_19915572_20848476_25082827_23128233_20228798_20228799_19915573_28008999	Ulcerative_colitis	85	60	3	0.00325244	1	Gpr65 Procr Zfp90
Rfx3	28452372_26831199	Glomerular_filtration_rate_(creatinine)	60	85	3	0.00325244	1	Dnajc16 Phtf2 Skil
Vax2	24489884	Anger	8	190	2	0.00325256	1	Abat Iyd
Stat4	22293688_18840781_17554260_17554300_19966805_18198356_25751624_17632545_21829393_18978792_21980299_19430480	Type_1_diabetes	40	265	4	0.00325444	1	Capsl Ifih1 Il2ra Ptpn2
Fosl1	24920014_29196614_24149102_21037568_22286212	Hodgkin's_lymphoma	6	259	2	0.00325476	1	Gata3 Lpp
Fosl1	23717212_22895189_19465909	Malaria	6	259	2	0.00325476	1	Atp2b4 Myh3
Rora	21829377_26584805	Plasma_omega-3_polyunsaturated_fatty_acid_level_(eicosapentaenoic_acid)	11	136	2	0.00325686	1	Nav2 Runx1
Lhx5	27918534_22589738_26480920_29178545	Subcutaneous_adipose_tissue	14	106	2	0.00326143	1	Rora Smad6
Bcl11b	27863252	Sum_eosinophil_basophil_counts	98	175	5	0.00326188	1	Asb2 Nfatc2 P4ha2 Pten Spsb1
Hlx	21909106_20861866_20385819_23577725_23326517_23455636_20385826_21665990_15761122_23536807_22694956	Age-related_macular_degeneration	18	82	2	0.00326839	1	C3 Pla2g12a
Egr4	26965516_28960316_29471430_23263487_29228715_21242260_18372901_27145994_26151821_23266556_23350875_27207650_22634755_17618284_17618283_17934461_25105248_19011631_24836286_24448986_20972440_28295283_24737748_18372905_25990418_21761138	Colorectal_cancer	72	146	4	0.00327669	1	4931406P16Rik D130043K22Rik Dip2b Slc22a3
Snai3	23512250_29348612_23007406_19684603_19684604_22076464_25310577	Acute_lymphoblastic_leukemia_(childhood)	23	64	2	0.0032781	1	Ptprj Slco3a1
Hoxb1	19247474_23049750_20418890_22832964_20418889_20418888_22006218	Smoking_behavior	15	99	2	0.00327873	1	Actn1 Cables1
Zfp367	29875488_28240269	Blood_protein_levels	620	69	8	0.00328521	1	Arrb2 Capn2 Col18a1 Col7a1 Fas Il12rb1 Lbp Pigr
Arntl2	29228715	Colorectal_adenoma_(advanced)	13	115	2	0.00329343	1	Bace2 Nod2
Fosl1	29403010_22286170_27863252	Lymphocyte_counts	96	259	6	0.0032937	1	Ank1 Atp2b4 Ikzf3 Klf3 Lta Rap1gap2
Cux1	17558408_20190752_18311140_22057235_24999842_23936387	Celiac_disease	32	46	2	0.00329713	1	Mttp Stat4
Nfe2l2	26974007	Chronic_inflammatory_diseases_(ankylosing_spondylitis,_Crohn's_disease,_psoriasis,_primary_sclerosing_cholangitis,_ulcerative_colitis)_(pleiotropy)	93	185	5	0.00330114	1	Antxr2 Crem Nfkb1 Notch1 Ptpn2
Creb1	29615537_29403010_28548082_28334899	Total_cholesterol_levels	54	95	3	0.00330114	1	Oit3 Pnpla3 Ubash3b
Zfx	24514567_21079607_23568457_28494655	Anorexia_nervosa	16	93	2	0.00330287	1	Aldh4a1 Sorcs2
Sox5	27989323	Interleukin-2_levels	11	137	2	0.00330396	1	Ebf1 Lekr1
Ahctf1	18758464_26192919_28067908_17068223_27569725_23128233_28008999	Inflammatory_bowel_disease	130	81	4	0.00330703	1	Crem Notch1 Skap2 Tm9sf4
Glis3	28158719_27863252_29403010_21738480_21738479_20139978_22037903_25096241	White_blood_cell_count	94	112	4	0.00331177	1	Acvrl1 Cdk6 Lta Nlrp3
Rarg	28644415	Western_dietary_pattern	8	192	2	0.00332003	1	Eea1 Itpr1
Ar	21297633_24837172_26192919_28067908_23511034_19122664_19915572_20848476_25082827_23128233_20228798_20228799_19915573_28008999	Ulcerative_colitis	85	124	4	0.0033213	1	H2-Aa Il7r Ptpn2 Zfp831
Prrx1	25245031_24159190	Asymmetrical_dimethylarginine_levels	10	152	2	0.00333189	1	Cdh3 Ddah1
Stat2	29875488_28240269	Blood_protein_levels	620	134	12	0.00333588	1	Atp8b4 B4galt1 Capn2 Fn1 Icam5 Ifi205 Il15ra Npc2 Plxnc1 Sell Slamf7 Treml2
Stat1	26830138	Alzheimer_disease_and_age_of_onset	62	280	5	0.00334791	1	Chn2 Col18a1 Sgk1 Snx9 Synj1
Ascl4	29771307	Rosacea_symptom_severity	33	45	2	0.00335556	1	Il13 Rnf217
Zfp382	20966902_20189936_21998595_19893584_23456168_25133637_25429064_20397748_23563607_22021425_20668459_20881960_29782485_18391952_19396169_19570815_17767157_18391950_19030899_18952825_18193045_19729412_18391951_19343178_25282103_28270201	Height	264	20	3	0.00335808	1	Dtl Nucb2 Sh3gl3
Aebp1	20966902_20189936_21998595_19893584_23456168_25133637_25429064_20397748_23563607_22021425_20668459_20881960_29782485_18391952_19396169_19570815_17767157_18391950_19030899_18952825_18193045_19729412_18391951_19343178_25282103_28270201	Height	264	20	3	0.00335808	1	Ltbp1 Slit3 Sulf1
Mxi1	25014791_21156761_20453842_21505073_20453841_19503088_17554300_28118524_18794853_24782177_23918589_24449572_21844665_21452313_23028356_23143596_22446963_24390342_17804836	Rheumatoid_arthritis	73	145	4	0.00336041	1	Ankrd55 D1Ertd622e Dpp4 Smtnl2
Junb	28193307_29403010_27863252_23314186_25096241	Monocyte_count	92	115	4	0.00337024	1	Dusp14 Foxo1 Slc9a3r1 Tbc1d14
Zbtb3	28928442	Measles	16	94	2	0.00337285	1	Nck2 Pappa2
Hmga2	27989323	Interleukin-9_levels	10	153	2	0.00337497	1	Lmo7 Nrp2
Nfkb1	27005419	Erythrocyte_cadmium_concentration_in_never_smokers	6	264	2	0.00337925	1	Mbp Psd3
Spib	27863252	Plateletcrit	126	198	6	0.00338815	1	Arhgef3 Cass4 Ehd3 Hdac9 Tert Tesk2
Irf5	24315451	Fractional_exhaled_nitric_oxide_(childhood)	8	194	2	0.00338816	1	Angpt1 Dlc1
Irf5	28701861	Fear_of_minor_pain	8	194	2	0.00338816	1	Mab21l3 Naglu
Pou2f2	28644415	Western_dietary_pattern	8	194	2	0.00338816	1	Eea1 Kcnq5
Erg	22293688_18840781_17554260_17554300_19966805_18198356_25751624_17632545_21829393_18978792_21980299_19430480	Type_1_diabetes	40	268	4	0.00338825	1	Cenpw Lmo7 Rasgrp1 Ubash3a
Ebf1	26174813	Attention_function_in_attention_deficit_hyperactive_disorder	7	224	2	0.00339557	1	Acoxl Dlg2
Klf12	24159190	Serum_dimethylarginine_levels_(asymmetric/symetric_ratio)	11	139	2	0.00339911	1	Ddah1 Zcchc24
Stat4	20208534	Eosinophilic_esophagitis_(pediatric)	6	265	2	0.00340442	1	Shroom3 Sntb1
Plagl2	25877299_26503584_19483681_23666240_28604732_23666239_28604728	Testicular_germ_cell_tumor	34	44	2	0.00340538	1	Pde8a Tert
Foxb1	23382691	IgG_glycosylation	146	171	6	0.00340906	1	Abcb9 Atf6 Ell2 Etv6 Igf2bp3 Igfbp7
Zbtb1	28158719_27863252_29403010	White_blood_cell_count_(basophil)	42	124	3	0.00341897	1	Atp8b4 Fam53b Pten
Ahrr	25134534_28346442_25581431	Epithelial_ovarian_cancer	17	89	2	0.00342242	1	Nsf Tiparp
Ahrr	23603761	Juvenile_idiopathic_arthritis_(oligoarticular_or_rheumatoid_factor-negative_polyarticular)	17	89	2	0.00342242	1	Ccr3 Prr5l
Hhex	26379185	Mild_influenza_(H1N1)_infection	18	84	2	0.00342654	1	Dmd L3mbtl3
Trp73	28584286	Cognitive_empathy	30	175	3	0.00343363	1	Dysf Phlpp1 Shroom3
Srebf1	29615537_29403010_28548082_28334899	Total_cholesterol_levels	54	198	4	0.00343644	1	Dock7 Fads2 Hmgcr Tom1
Smad3	26049409_17553421_20885792_21390209_28714976_26339675_24162737_22881374_21379329_21460841_23571587_23565137	Alzheimer's_disease_(late_onset)	36	300	4	0.00344136	1	Abi3 Celf2 Rhbdf1 Sorl1
Zfp628	29531354_17434096_26089329_22306652_19369658	Stroke	21	72	2	0.00344603	1	Hdac9 Lrch1
Bcl6	29617998_24518671_25637523_22570627_29235454_24002674_28073927_25173106	Intraocular_pressure	116	289	7	0.00345119	1	Ets2 Fez2 Ltbp1 P4ha2 Rapsn Stox2 Tns1
Irf8	27629089	Multiple_system_atrophy	12	128	2	0.00345317	1	Fbn2 Rreb1
Cebpb	28644415	Western_dietary_pattern	8	196	2	0.00345695	1	Eea1 Itpr1
Cebpb	23726511	Post-traumatic_stress_disorder_(asjusted_for_relatedness)	8	196	2	0.00345695	1	Ndrg1 Zmat3
Glis1	27863252	Granulocyte_percentage_of_myeloid_white_cells	90	58	3	0.00347154	1	Ccdc125 Cxcr2 Glcci1
Stat4	27863252	Sum_neutrophil_eosinophil_counts	66	265	5	0.00347377	1	Atxn1 Cdk6 Chd7 Nlrp3 Rbpms
Zic5	27863252	Lymphocyte_percentage_of_white_cells	76	20	2	0.00347618	1	Cdk6 Il1rn
Srebf1	27863252	Eosinophil_percentage_of_white_cells	88	198	5	0.00347684	1	Apbb1ip Chd7 Ikzf3 Pparg Trerf1
Nfia	19656524_28054174_22419666_22863734_20023658	Orofacial_clefts	22	69	2	0.00347786	1	Fhit Zic2
Zfp148	26049409_17553421_20885792_21390209_28714976_26339675_24162737_22881374_21379329_21460841_23571587_23565137	Alzheimer's_disease_(late_onset)	36	301	4	0.00348255	1	Abi3 Cass4 Sqstm1 Zcwpw1
Junb	27863252	Monocyte_percentage_of_white_cells	93	115	4	0.00350382	1	Foxo1 Ifitm2 Slc9a3r1 Tbc1d14
Zeb1	27386562_18941528_20453840_18997785_21654844_21244703_24076602_28445677_21833088_23412934_19010793_20598377_17660530_19525955_22457343_19525953_22190364	Multiple_sclerosis	102	171	5	0.00350989	1	Cog6 Lpp Malt1 Rreb1 Traf3
Nkx3-1	29535710	IgG_glycosylation_patterns	7	228	2	0.00351547	1	B4galt1 Fut8
Sgsm2	27863252	Lymphocyte_percentage_of_white_cells	76	141	4	0.00351572	1	Icam5 Ifitm2 Stxbp6 Zfp831
Foxh1	21297633_24837172_26192919_28067908_23511034_19122664_19915572_20848476_25082827_23128233_20228798_20228799_19915573_28008999	Ulcerative_colitis	85	126	4	0.00351732	1	Bsn Gpr35 Hdac9 Litaf
Zbtb46	22182935_28072414_21771265_27329760_19488044_19416921_17554300_25827505_21353194_21738484_22205951_21254220_28115744_21926972_17486107_22688191_18711365_22925353_24618891	Bipolar_disorder	61	25	2	0.00352097	1	Cacnb3 Dlc1
Etv4	27863252	Lymphocyte_percentage_of_white_cells	76	69	3	0.00352244	1	Cdk6 Nfkb1 Zfp36l2
Spib	23544013_29058716	Breast_Cancer_in_BRCA1_mutation_carriers	8	198	2	0.0035264	1	Ncoa1 Tert
Srebf1	23726511	Post-traumatic_stress_disorder_(asjusted_for_relatedness)	8	198	2	0.0035264	1	Ndrg1 Prkca
Bhlhe40	17903302	Tonometry	9	175	2	0.0035347	1	Prex1 Syne1
Stat4	29875488_28240269	Blood_protein_levels	620	265	19	0.00354366	1	B3gnt8 C3 Clic5 Col15a1 Ecm1 Fas Fgf2 Icam1 Ifi204 Ifi205 Lama5 Mapkapk2 Plxnc1 Ptn Sell Sema4d Tg Tmprss6 a
Rreb1	29213071_19305408_19305409_16648850_22726844_24952745_23166209_20031603_23534349	QT_interval	66	163	4	0.0035484	1	Cnot1 Crebbp Ncoa2 Ypel2
Nkx1-2	29662059	Depression_(broad)	30	51	2	0.00355501	1	Kcnq5 Sgip1
Irf2	23143596	Rheumatoid_arthritis_(ACPA-positive)	24	223	3	0.00355812	1	Aff3 Rasgrp1 Stat4
Zfp369	20884846_17997608_18834626_18327256_18327257_23263486_21768215_28270201_20139978_18179892	Urate_levels	34	45	2	0.00355937	1	Abcg2 Trim46
Ascl4	28928442_27182965	Childhood_ear_infection	34	45	2	0.00355937	1	Rapgef5 Slc22a3
Nfkb2	19553259_21935397	Obesity_(extreme)	8	199	2	0.00356137	1	Eml6 Fbn2
Klf7	27989323	Granulocyte-colony_stimulating_factor_levels	8	199	2	0.00356137	1	Afap1 Vgll4
Zfp148	27863252	Basophil_percentage_of_granulocytes	18	301	3	0.00356193	1	Bcl2 Chd7 Larp4b
Zscan10	29494758_23273568_18204447_26502338_24871463_23053960_25862617_21044949_21408207_18204098_20169177_29848360_18204446_19165918_28714469_26606652_22291604_26663301_26316170_19838193_19838195_27399966	Systemic_lupus_erythematosus	147	119	5	0.00356404	1	Dab2 Fcgr3 Mgat5 Pld2 Sbno2
Hsf2	21297633_24837172_26192919_28067908_23511034_19122664_19915572_20848476_25082827_23128233_20228798_20228799_19915573_28008999	Ulcerative_colitis	85	62	3	0.00356923	1	Gramd1b Notch1 Ptprc
Rara	28334935_25352340	Iron_status_biomarkers_(iron_levels)	14	111	2	0.0035696	1	Sept9 Tmprss6
Rbpj	29403010_22286170_27863252	Lymphocyte_counts	96	112	4	0.00357207	1	Acoxl Arhgef3 Irf4 Klf3
Zfp629	29403010_23022100	Serum_total_protein_level	17	91	2	0.00357471	1	Ell2 Tbc1d16
Gata1	27790247	Age-related_diseases_and_mortality	7	230	2	0.00357616	1	Itpk1 Tcf7l2
Rora	23263486_21983786_22179738_27899376_25967671_29453348_25646370	Gout	39	136	3	0.00358783	1	Abcc9 Abcg1 Prkca
Rara	27863252	Reticulocyte_count	97	111	4	0.00359018	1	Ank1 Hbs1l Sept9 Tmprss6
Stat4	24827717_28892062_20966902_24064335_24348519_20935630_28448500_25133637_18454148_20397748_27296613_23563607_22344219_28296344_23669352_23583978_17434869_25760438_25673413_26865924_24861553_19079260_19079261_25953783_26426971_22982992_28270201_19851299_22446040	Body_mass_index	235	265	10	0.00359248	1	Bace2 Bcl2 Cacnb2 Ehbp1 Fgf2 Gipr Sema4d Stk39 Trim66 Vgll4
Foxp1	27863252	Sum_eosinophil_basophil_counts	98	54	3	0.00360352	1	Brd3 Tbx6 Zfp365
Hic1	27863252	Sum_eosinophil_basophil_counts	98	110	4	0.00360593	1	Asb2 Bcl2l11 Lpp Trerf1
Zic2	21757653_20031576_23969696_20031577	Fibrinogen	15	104	2	0.00361097	1	Dip2b Nlrp3
Gli3	22424883	Pulmonary_function_decline	12	131	2	0.00361339	1	Slc24a3 Svep1
Jund	19197348	Quantitative_traits	12	131	2	0.00361339	1	Hmgcr Trim24
Pparg	17903302	Tonometry	9	177	2	0.00361423	1	Exoc4 Syne1
Nfkb1	29403010_22286170_27863252	Lymphocyte_counts	96	264	6	0.00361718	1	Acoxl Dnmt3a Irf4 Nfkbia Ptprc Tle4
Rxra	27680694_20372150_23202124	Birth_weight	29	381	4	0.00363024	1	Abcc9 Adcy5 Ank1 Igf2bp3
Runx2	23726511	Post-traumatic_stress_disorder_(asjusted_for_relatedness)	8	201	2	0.0036318	1	Fam49b Prkca
Thra	22581228	Fasting_blood_insulin_(BMI_interaction)	10	159	2	0.00363899	1	Pparg Tcf7l2
Hdx	27082954	Peripheral_arterial_disease_(traffic-related_air_pollution_interaction)	61	87	3	0.00363963	1	Mtss1 Rilpl2 Utrn
Erg	29213071_19305408_19305409_16648850_22726844_24952745_23166209_20031603_23534349	QT_interval	66	268	5	0.00364434	1	Arhgap10 Litaf Mbp Prkca Tcea3
Runx2	27863252	Plateletcrit	126	201	6	0.0036473	1	Cables1 Cass4 Ets1 Runx1 Ston2 Thada
Scmh1	28193307_29403010_27863252_23314186_25096241	Monocyte_count	92	17	2	0.00365203	1	Foxo1 Tnfrsf1a
Irf1	24347629_26962152	Periodontal_disease-related_phenotypes	9	178	2	0.00365431	1	Ifi203 Ifi204
Mafg	24514567_21079607_23568457_28494655	Anorexia_nervosa	16	98	2	0.00365968	1	Aldh4a1 Ppp3ca
Hmga2	28443625	Waist_circumference_adjusted_for_BMI_in_non-smokers	35	153	3	0.00366543	1	Cdk6 Loxl1 Ltbp1
Nr4a2	29403010_27863252_28017375_23263863_28453575_19862010_20139978	Mean_corpuscular_volume	180	98	5	0.00367866	1	Acoxl Cdk6 Fam46c Tmc6 Tmcc2
Sox21	27863252	Neutrophil_percentage_of_granulocytes	77	141	4	0.00368513	1	Exoc2 Tnfsf8 Zc3h7b Zfp652
Mxi1	21909108_26343869	Carotid_intima_media_thickness	11	145	2	0.00369227	1	Agl Ebf1
Sp2	26352407_21572414	Urinary_metabolites	11	145	2	0.00369227	1	Arhgap17 Slc6a13
Prdm1	29403010_22286170_27863252	Lymphocyte_counts	96	184	5	0.00369757	1	Ets1 Fam49b Icam1 Ikzf3 Nlrc5
Vax2	26974007	Chronic_inflammatory_diseases_(ankylosing_spondylitis,_Crohn's_disease,_psoriasis,_primary_sclerosing_cholangitis,_ulcerative_colitis)_(pleiotropy)	93	190	5	0.00369884	1	Ern1 Ets1 Il23r Jazf1 Thada
Hoxd11	22293688_18840781_17554260_17554300_19966805_18198356_25751624_17632545_21829393_18978792_21980299_19430480	Type_1_diabetes	40	39	2	0.00369986	1	Cd226 Ubash3a
Bbx	27863252	High_light_scatter_reticulocyte_count	112	97	4	0.0037073	1	Atxn1 Bmp7 Itga4 Tmc6
Stat4	27863252	Granulocyte_count	67	265	5	0.00370761	1	Atxn1 Cdk6 Chd7 Nlrp3 Rbpms
Sall3	28443625	Waist_circumference_adjusted_for_BMI_(adjusted_for_smoking_behaviour)	46	34	2	0.00371657	1	Cdk6 Dnmt3a
Zfp420	29198719	Lobe_attachment_(rater-scored_or_self-reported)	54	29	2	0.00371938	1	Epm2a Hdac9
Atf5	27015805	Parental_longevity_(combined_parental_age_at_death)	21	75	2	0.00373306	1	Vps13a Zcchc4
Runx2	25035420_23534349_27659466_27577874_21076409	QRS_duration	27	201	3	0.00373874	1	Hlf Klf12 Prkca
Nfic	27863252	High_light_scatter_reticulocyte_count	112	48	3	0.00375556	1	Ccnd3 Sema4d Tmc6
Vax2	29875488_28240269	Blood_protein_levels	620	190	15	0.00375732	1	Ccl25 Clic5 Csf2rb Ctsb Ctss Cxcl5 Igfbp7 Il12rb1 Il23r Mpzl3 Ncam1 Pltp Plxdc2 Ppp4r4 Rad52
Gata3	25574825	Inflammatory_skin_disease	36	150	3	0.00375828	1	Adam19 Exoc2 Pde4a
Zfp369	22700719_28165464_18758461_21131588_23770605_24292274_26956414	Chronic_lymphocytic_leukemia	35	45	2	0.00376883	1	Arsb Gramd1b
Etv6	27424798	Cutaneous_squamous_cell_carcinoma	8	205	2	0.00377463	1	Irf4 Lpp
Foxf2	27863252	Platelet_distribution_width	101	253	6	0.00377611	1	Abcd3 Ehd3 Lrch1 Nrip1 Tlk1 Tmcc2
Hmga2	29617998_24518671_25637523_22570627_29235454_24002674_28073927_25173106	Intraocular_pressure	116	153	5	0.00378965	1	Fbn1 Lmo7 Ltbp1 Sept9 Tns1
Stat1	18521091	Response_to_iloperidone_treatment_(QT_prolongation)	6	280	2	0.00379261	1	Palld Slco3a1
Stat1	27005419	Erythrocyte_cadmium_concentration_in_never_smokers	6	280	2	0.00379261	1	Mbp Slc39a8
Nfia	29146897_18849991_22693459_27182965	Male-pattern_baldness	23	69	2	0.00379925	1	Ebf1 Irf4
Smad4	28166213_29394082_24023788	Lung_function_(FEV1/FVC)	26	61	2	0.00380571	1	Adam19 Cisd3
Grhl2	29771307	Rosacea_symptom_severity	33	48	2	0.00380961	1	Rnf217 Sema6d
Nfic	28031287	Cerebrospinal_fluid_biomarker_levels	33	48	2	0.00380961	1	Arsb Erap1
Plagl2	24324551	PR_interval_in_Tripanosoma_cruzi_seropositivity	36	44	2	0.00381185	1	Kif13b Serpinb5
Hes1	24324551	PR_interval_in_Tripanosoma_cruzi_seropositivity	36	44	2	0.00381185	1	Serpinb5 Sv2c
Zfp263	27386562_18941528_20453840_18997785_21654844_21244703_24076602_28445677_21833088_23412934_19010793_20598377_17660530_19525955_22457343_19525953_22190364	Multiple_sclerosis	102	251	6	0.00381356	1	Ankrd55 Chst12 Ets1 L3mbtl3 Tef Tnfrsf1a
Foxb1	29403010_19198610_27863252	Eosinophil_counts	104	171	5	0.00381442	1	Bcl2a1a Bcl2a1d Bcl2l11 Cd200r1 Il4ra
Sox4	20585627_23548203_26926045	Hair_color	13	124	2	0.00381687	1	Irf4 Plxdc2
E2f1	28158719_27863252_29403010	White_blood_cell_count_(basophil)	42	129	3	0.00382075	1	Apbb1ip Fam53b Larp4b
Npas2	27863252	Reticulocyte_fraction_of_red_cells	106	51	3	0.00382107	1	Atp11a Atxn1 Bcl2l11
Casz1	27863252	Granulocyte_percentage_of_myeloid_white_cells	90	60	3	0.00382121	1	Ccdc125 Cdk6 Sh2d3c
Maff	29531354_17434096_26089329_22306652_19369658	Stroke	21	76	2	0.00383114	1	Casz1 Zfhx3
Tcf4	21829377	Plasma_omega-3_polyunsaturated_fatty_acid_levels_(docosapentaenoic_acid)	12	135	2	0.00383235	1	Agpat3 Fads2
Zic5	21507922_29403010_20172861_27863252_25096241	Neutrophil_count	80	20	2	0.00384358	1	Cdk6 Il1rn
Irf5	28193307_29403010_27863252_23314186_25096241	Monocyte_count	92	194	5	0.00385826	1	Ankrd55 Dusp14 Nostrin Ssh2 Thrb
Prox1	20485516_29760442_23493294_20719862_28171582	Central_corneal_thickness	28	57	2	0.00385827	1	Lrrk1 Wnt10a
Atmin	20686608_27579533_25086665_19648918_22158540_29422604_23180869_20101243_26098869	Pancreatic_cancer	28	57	2	0.00385827	1	Rnf149 Sbf2
Rara	27863252	High_light_scatter_reticulocyte_percentage_of_red_cells	99	111	4	0.00386245	1	Ank1 Hbs1l Itga4 Sept9
Dmrt1	22883433_20185149_18347602_23212062_19571808_23894747_18677311_28991256_18282107_25056061_21926974_22688191_19571811_18332876_21682944_26198764_21679298_23974872_27922604_24043878_22037555_23358160_26531332_22885689_22037552_23142968	Schizophrenia	322	80	6	0.0038647	1	H2-Ob Itpr3 Mmp16 Srpk2 Tacc2 Trpm6
Prdm1	27863252	Reticulocyte_count	97	184	5	0.0038654	1	Bzw2 Fam46c Riok3 Sema4d Tmprss6
Elk4	28158719_27863252_29403010	White_blood_cell_count_(basophil)	42	38	2	0.00386956	1	Cdk6 Larp4b
Sp4	23612905_21900946_22922229_21841780	Graves'_disease	10	582	3	0.00386995	1	Itpr3 Lpp Tg
Foxb1	27015805	Parental_extreme_longevity_(95_years_and_older)	32	171	3	0.00387379	1	Gbp11 Gbp6 Gbp9
Klf6	29228715	Colonoscopy-negative_controls_vs_population_controls	47	34	2	0.00387696	1	Klf12 Ryr2
Gata1	20173748_25584925_22080838_29394082_19300482_25241909_28166215_25101718	Chronic_obstructive_pulmonary_disease	24	230	3	0.00388055	1	Dlg2 Dsp Tm9sf4
Hbp1	20150558_27989323	Interleukin-18_levels	22	73	2	0.0038839	1	Bco2 Il18
Hbp1	18464913	Protein_quantitative_trait_loci	22	73	2	0.0038839	1	Bco2 Fam49b
Foxs1	26955885_27494321_26835600	Morning_vs._evening_chronotype	41	133	3	0.00388655	1	Pdia2 Rgs16 Rgs8
Plagl1	27629089	Multiple_system_atrophy	12	136	2	0.00388804	1	Rreb1 Xdh
Sox13	27629089	Multiple_system_atrophy	12	136	2	0.00388804	1	Elovl7 Xdh
Creb1	29403010_21900944	Aspartate_aminotransferase_levels	17	95	2	0.00388867	1	Cacnb2 Pnpla3
Stat4	28158719_27863252_29403010	White_blood_cell_count_(basophil)	42	265	4	0.0038914	1	Bcl2 Cdk6 Larp4b Rufy4
Smad3	22899653_26732429_21725308_18780872_24880342_18978790_23143601_18978787_19654303_28604730_18385738_27393504_20304703_18385676	Lung_cancer	60	300	5	0.00389439	1	Acvr1b Mpzl2 Sema6d Trim26 Wdr76
Rxrb	22883433_20185149_18347602_23212062_19571808_23894747_18677311_28991256_18282107_25056061_21926974_22688191_19571811_18332876_21682944_26198764_21679298_23974872_27922604_24043878_22037555_23358160_26531332_22885689_22037552_23142968	Schizophrenia	322	56	5	0.00389845	1	Fyn H2-Ob Tacc2 Trpm6 Ttyh3
Foxc1	27989323	Interferon_gamma_levels	9	184	2	0.00389917	1	Cysltr2 Palld
Foxn2	23143596	Rheumatoid_arthritis_(ACPA-positive)	24	67	2	0.00390268	1	D1Ertd622e Rasgrp1
Zic2	27863252	Reticulocyte_fraction_of_red_cells	106	104	4	0.0039071	1	Arhgef3 Rreb1 Smox Tmc6
Stat3	23817569	Self-reported_allergy	12	479	3	0.00391305	1	Lpp Plcl1 Smad3
Stat3	25811787	Urate_levels_in_overweight_individuals	12	479	3	0.00391305	1	Abcg2 Dlg2 Nid1
Stat4	29531354_17434096_26089329_22306652_19369658	Stroke	21	265	3	0.00391502	1	Cdk6 Impa2 Lrch1
Stat4	27863252	Basophil_percentage_of_white_cells	21	265	3	0.00391502	1	Bcl2 Chd7 Larp4b
Nfatc4	21507922_29403010_20172861_27863252_25096241	Neutrophil_count	80	138	4	0.00391517	1	Acvr1b Ccdc125 Ccnd3 Plcl1
Nfatc2	26379185	Mild_influenza_(H1N1)_infection	18	90	2	0.0039221	1	Dlg2 L3mbtl3
Glis1	28158719_27863252_29403010_21738480_21738479_20139978_22037903_25096241	White_blood_cell_count	94	58	3	0.00392354	1	Ccdc125 Cxcr2 Gabbr1
Atf3	22379998	Adverse_response_to_lamotrigine_and_phenytoin	6	285	2	0.00392645	1	Adamts20 Adipor2
Atf3	27702941	Caffeine_metabolism_(plasma_1,7-dimethylxanthine_(paraxanthine)_to_1,3,7-trimethylxanthine_(caffeine)_ratio)	6	285	2	0.00392645	1	Ahr Clk3
Foxo3	17903302	Tonometry	9	185	2	0.00394071	1	Exoc4 Slc9a9
Sox5	28641921_26252872	Cerebrospinal_fluid_t-tau:AB1-42_ratio	12	137	2	0.00394412	1	Dlg2 Rabgap1l
Sox5	27089181	Positive_affect	12	137	2	0.00394412	1	Cacna2d1 Maml3
Sox5	23740937	Systemic_lupus_erythematosus_and_Systemic_sclerosis	12	137	2	0.00394412	1	Lamc2 Stat4
Arid3a	28441456	Facial_morphology_(factor_15,_philtrum_width)	12	137	2	0.00394412	1	Npas2 Nxn
Arid3a	25574825_23886662_26482879_23042114_21666691_22197932_25865352	Atopic_dermatitis	12	137	2	0.00394412	1	Kif3a Prr5l
Ikzf2	25188341	Neurofibrillary_tangles	8	210	2	0.00395685	1	Itga4 Klf12
Foxf2	27386562_18941528_20453840_18997785_21654844_21244703_24076602_28445677_21833088_23412934_19010793_20598377_17660530_19525955_22457343_19525953_22190364	Multiple_sclerosis	102	253	6	0.00396386	1	Asap1 Chst12 Ets1 Lpp Prr5l Traf3
Nr4a2	22293688_18587394_17554261_28067908_26891255_23850713_22412388_17554300_26192919_20570966_17684544_23266558_17435756_22936669_23128233_17804789_21102463_17447842_28008999	Crohn's_disease	113	98	4	0.00396993	1	Crem Gpr65 Map3k8 Stat4
Ppara	23263486_21983786_22179738_27899376_25967671_29453348_25646370	Gout	39	141	3	0.00397039	1	Abca1 Prkca Tpst1
Sox12	29186694	Cognitive_ability_(MTAG)	36	45	2	0.00398392	1	Dpp4 Exoc4
Aebp2	24351856_20383146_22479191_26420894_26831199	Chronic_kidney_disease	25	65	2	0.00398779	1	Slc22a2 Ube2q2
L3mbtl3	22138694_21743469_20062062_23749187	Ankylosing_spondylitis	22	74	2	0.0039887	1	Il23r Tnfrsf1a
Msc	18464913	Protein_quantitative_trait_loci	22	74	2	0.0039887	1	Cacnb2 Eps8
Irf4	27863252	Sum_neutrophil_eosinophil_counts	66	822	9	0.00399366	1	Atxn1 Cxcl5 Eml6 Ifitm2 Il1rn Lyn Pik3r3 S1pr2 Stxbp6
Msc	17658951_22013104_23251661	Obesity-related_traits	351	74	6	0.00399505	1	Bmp2 Cacnb2 Ebf1 Gpr141 Myo10 Slc29a3
Irf4	29403010_19198610_27863252	Eosinophil_counts	104	822	12	0.00399548	1	Asb2 Bcl2 Bcl2l11 Dock3 Exoc2 Gata3 Ikzf2 Kdm6b Nfkb1 Pten Stxbp6 Zfpm1
Nfat5	27659466	QRS_complex_(12-leadsum)	13	127	2	0.00399945	1	Prkca Wipf1
Nfatc4	23817569	Self-reported_allergy	12	138	2	0.00400057	1	Il2ra Plcl1
Etv1	29403010_27863252_28017375_23263863_28453575_19862010_20139978	Mean_corpuscular_volume	180	100	5	0.00401077	1	Ephx3 Lmo2 Pim1 Thada Tyms
Rxra	28644415	Prudent_dietary_pattern	15	381	3	0.00402346	1	Kif26b Sh3bp5 Vit
Srebf2	27863252	High_light_scatter_reticulocyte_percentage_of_red_cells	99	182	5	0.0040266	1	Bzw2 Pnkd S1pr2 Tln2 Tns1
Stat4	18758464_26192919_28067908_17068223_27569725_23128233_28008999	Inflammatory_bowel_disease	130	265	7	0.00402979	1	Ifih1 Ifngr2 Il2ra Litaf Ptpn2 Sbno2 Smad3
Fosl1	28453575_27863252	Red_cell_distribution_width	100	259	6	0.00403029	1	Ank1 Atp2b4 Dip2b Rcl1 Stx7 Tmprss6
Lef1	29460428_24277619	Alcohol_consumption_(maxi-drinks)	8	212	2	0.00403088	1	Igfbp7 Lamc3
Lef1	28443625	Waist-to-hip_ratio_adjusted_for_BMI_in_non-smokers	8	212	2	0.00403088	1	Ccdc92 Klf13
Mef2b	26390057_29403010	Mean_arterial_pressure	21	78	2	0.00403089	1	Casz1 Hdac4
Tead1	29875488_28240269	Blood_protein_levels	620	288	20	0.00403706	1	Atp1b2 B4galt1 Col15a1 Ctsb Icam1 Icam5 Il23r Mndal Ncam1 Npc2 Nrp1 Pigr Ptgfrn Qrich1 Reep3 Slamf7 St3gal1 Tnfrsf11a Treml2 a
Homez	29083406	Allergic_disease_(asthma,_hay_fever_or_eczema)	51	32	2	0.00403823	1	Lpp Rora
Pou2f2	26974007	Chronic_inflammatory_diseases_(ankylosing_spondylitis,_Crohn's_disease,_psoriasis,_primary_sclerosing_cholangitis,_ulcerative_colitis)_(pleiotropy)	93	194	5	0.00404092	1	Bank1 Cd226 Crem Ptpn2 Ubash3a
Zfp281	29403010_27863252_28017375_28453575_19862010_29615537	Hematocrit	76	238	5	0.00404558	1	Gprc5a Hk1 L3mbtl3 Stab1 Vegfa
Pou2af1	22368281_20339536	Response_to_statin_therapy	11	152	2	0.00404877	1	Fads2 Prdm16
Pou2af1	21829377_26584805	Plasma_omega-3_polyunsaturated_fatty_acid_level_(eicosapentaenoic_acid)	11	152	2	0.00404877	1	Fads2 Nav2
Klf2	22368281_20339536	Response_to_statin_therapy	11	152	2	0.00404877	1	Fads2 Glis1
Prrx1	27182965	Joint_mobility_(Beighton_score)	11	152	2	0.00404877	1	Loxl1 Vcan
Batf	23726511	Post-traumatic_stress_disorder_(asjusted_for_relatedness)	8	759	3	0.00405576	1	Fam49b Prkca Zmat3
Sp6	25778476_28183528	Alzheimer's_disease_in_APOE_e4-_carriers	12	139	2	0.0040574	1	Sorl1 Wnt3
Irf8	23897914	Bronchopulmonary_dysplasia	13	128	2	0.0040612	1	Cep170 Tnk2
Hdx	23322567_22144915_23761726_29422769	Corneal_astigmatism	19	87	2	0.00408874	1	Lmo7 Tnr
Atf5	21107309_19721433_20195266_23241943	Response_to_antipsychotic_treatment	22	75	2	0.00409482	1	Ppard Trpm1
Nr3c1	27182965	Joint_mobility_(Beighton_score)	11	153	2	0.00410096	1	Loxl1 Vcan
Hmga2	29292387	Neuroticism_(MTAG)	11	153	2	0.00410096	1	Prox2 Vrk2
Rara	28644415	Prudent_dietary_pattern	15	111	2	0.00410147	1	Padi2 Ston2
Irf4	20966902_20189936_21998595_19893584_23456168_25133637_25429064_20397748_23563607_22021425_20668459_20881960_29782485_18391952_19396169_19570815_17767157_18391950_19030899_18952825_18193045_19729412_18391951_19343178_25282103_28270201	Height	264	822	23	0.00410376	1	Adamts17 Amz1 Cenpw Cs Dnmt3a Dock3 Esr1 Etv6 Extl3 Kdm6b Loxl1 Pappa2 Pccb Pml Ptprj Rgs8 Sh3gl3 Slit3 Sulf1 Sytl2 Tmem88 Tns1 Zbtb4
Tcf7l1	29494758_23273568_18204447_26502338_24871463_23053960_25862617_21044949_21408207_18204098_20169177_29848360_18204446_19165918_28714469_26606652_22291604_26663301_26316170_19838193_19838195_27399966	Systemic_lupus_erythematosus	147	123	5	0.00410382	1	Ikzf3 Il12rb2 Mgat5 Slc29a3 Tnfsf4
Zbtb7b	22566498	Response_to_angiotensin_II_receptor_blocker_therapy	8	214	2	0.00410556	1	Apbb1ip Dnajc21
Trp53	24514567_21079607_23568457_28494655	Anorexia_nervosa	16	104	2	0.0041106	1	Aldh4a1 Mctp1
Jdp2	27171184_26434682	Coronary_artery_aneurysm_in_Kawasaki_disease	16	104	2	0.0041106	1	Myo3b Nav2
Zic2	29403010	Hemoglobin_A1c_levels	16	104	2	0.0041106	1	Fads2 Tmc6
Foxc1	27082954	Peripheral_arterial_disease_(traffic-related_air_pollution_interaction)	61	184	4	0.00411256	1	Got1 Maf Paqr8 Tnik
Sp4	23000144_26394269_21399635_28062665_19458352_20639880_28425483	Primary_biliary_cholangitis	32	582	5	0.00411658	1	Arid3a Ikzf3 Il7r Nfkb1 Tnfrsf1a
Nr4a2	28604730	Small_cell_lung_carcinoma	17	98	2	0.0041323	1	Crtam Scin
Nfe2l2	27863252	Sum_eosinophil_basophil_counts	98	185	5	0.00413241	1	Bcl2 Chd7 Nfatc2 Nfkb1 Zfpm1
Zfp219	27863252	Sum_eosinophil_basophil_counts	98	185	5	0.00413241	1	Kdm6b Klf3 Ptprc Spsb1 Trerf1
Phf20	29273593_21048783	Moyamoya_disease	21	79	2	0.00413255	1	Nln Sbf2
Runx2	25064009_23793441_28011712_24511991_26227905_27182965_28892059_24842889_20711177_21084426_22451204_16252231_21738487_17052657_21044948_22438815_21812969_19915576_19915575_21292315_20070850	Parkinson's_disease	56	201	4	0.00413577	1	Agap1 Dlg2 Gpr65 Map4k4
Osr2	27770636	Late-onset_Alzheimer's_disease	38	147	3	0.0041437	1	Abca8b Dlc1 Selp
Tcf12	28416818_29290336_20173747_22544366_28416822_19597492_17903304_19597491	Atrial_fibrillation	26	217	3	0.00415551	1	Anxa4 Cep68 Zfhx3
Foxp3	27386562_18941528_20453840_18997785_21654844_21244703_24076602_28445677_21833088_23412934_19010793_20598377_17660530_19525955_22457343_19525953_22190364	Multiple_sclerosis	102	110	4	0.0041604	1	Ccl22 Plekhg5 Slamf7 Stat4
Irf1	27386562_18941528_20453840_18997785_21654844_21244703_24076602_28445677_21833088_23412934_19010793_20598377_17660530_19525955_22457343_19525953_22190364	Multiple_sclerosis	102	178	5	0.00416243	1	Alpk2 Cd86 Ddah1 Rreb1 Slamf7
Six5	29273593_21048783	Moyamoya_disease	21	271	3	0.00416842	1	Nln Sbf2 Smpdl3b
Pparg	29494758_23273568_18204447_26502338_24871463_23053960_25862617_21044949_21408207_18204098_20169177_29848360_18204446_19165918_28714469_26606652_22291604_26663301_26316170_19838193_19838195_27399966	Systemic_lupus_erythematosus	147	177	6	0.0041724	1	5430427O19Rik Atxn1 Bank1 Mgat5 Rabgap1l Sez6l2
Glis3	24105470_22479202_21700879_26299439_21771975_22065538_20011104_19165155_20018283	Adiponectin_levels	15	112	2	0.00417394	1	Creg2 Dlg4
Hsf1	28470677	Survival_in_pancreatic_cancer	15	112	2	0.00417394	1	Il17f Kcnk10
Runx1	28540026	Autism_spectrum_disorder_or_schizophrenia	64	176	4	0.004174	1	Cacnb2 Fgfr1 Srpk2 Vrk2
Sox15	19779542_23406873_21640322_21095009_22685421_23049088	Myopia_(pathological)	26	64	2	0.00418088	1	Abca1 Zfp536
Zfp791	18758464_26192919_28067908_17068223_27569725_23128233_28008999	Inflammatory_bowel_disease	130	13	2	0.00418605	1	F5 Hormad2
Vdr	27723756	Gut_microbiota_(beta_diversity)	9	191	2	0.00419434	1	Bank1 Vdr
Foxb1	25456346_24677629_26114229_27167565_23726511	Post-traumatic_stress_disorder	10	171	2	0.00419522	1	Ankrd55 Ust
Foxb1	25130324	Heschl's_gyrus_morphology	10	171	2	0.00419522	1	Cd28 Tnfaip8
Meis1	29617998_24518671_25637523_22570627_29235454_24002674_28073927_25173106	Intraocular_pressure	116	97	4	0.00420169	1	Ets1 Lpp Pkhd1 Tns1
Maff	18464913	Protein_quantitative_trait_loci	22	76	2	0.00420224	1	Angptl6 Eps8
Glis3	21057379_22688191_20889312	Bipolar_disorder_and_schizophrenia	50	112	3	0.00421599	1	Adam19 Ngf Rin2
Tcf12	26379185	Influenza_A_(H1N1)_infection	8	217	2	0.0042188	1	Atad2b L3mbtl3
Fosl2	25574825_23886662_26482879_23042114_21666691_22197932_25865352	Atopic_dermatitis	12	492	3	0.0042193	1	Ovol1 Prr5l Zfp365
Nr4a2	29403010_20139978_28453575_27863252_28017375	Red_blood_cell_count	115	98	4	0.00422595	1	Acoxl Cacna1c Cdk6 Tmc6
Sox21	21507922_29403010_20172861_27863252_25096241	Neutrophil_count	80	141	4	0.00422643	1	Acvr1b Atxn1 Eml6 Plcl1
Elf1	28199695	Mosquito_bite_size	60	306	5	0.00423493	1	Appl2 Brd3 Ets1 Lrch1 Usp22
Dmrt1	29531354_17434096_26089329_22306652_19369658	Stroke	21	80	2	0.00423541	1	Casz1 Lrch1
Dmrt1	27863252	Basophil_percentage_of_white_cells	21	80	2	0.00423541	1	Chd7 Grip1
Foxf2	24351856_29403010_27588450_23535967	Glomerular_filtration_rate	45	253	4	0.00424234	1	Fap Gab2 Shroom3 Ube2q2
Ikzf5	23453885	Autism_spectrum_disorder,_attention_deficit-hyperactivity_disorder,_bipolar_disorder,_major_depressive_disorder,_and_schizophrenia_(combined)	31	54	2	0.00424282	1	Hdac4 Kif5c
Srf	22961000	Primary_biliary_cirrhosis	13	131	2	0.00424914	1	Il12rb2 Stat4
Runx2	18758464_26192919_28067908_17068223_27569725_23128233_28008999	Inflammatory_bowel_disease	130	201	6	0.00425064	1	Ets1 Galc Gpr65 Il23r Stat4 Thada
Atf3	28193307_29403010_27863252_23314186_25096241	Monocyte_count	92	285	6	0.00425636	1	Ankrd55 Bcl2 Csf1 Dock10 Dusp14 Ssbp4
Isl2	21042317_29187746_20516156_22472876_23377640_27777418_23857890_29495898_28540843_29728651_21621269_21521612_20125088_29317602	Major_depressive_disorder	61	92	3	0.00425847	1	Cacna2d1 Trps1 Zcchc14
Tcf7l2	29292387	Depressive_symptoms	11	156	2	0.00425944	1	Celf4 Vrk2
Tcf7l2	29292387	Neuroticism_(MTAG)	11	156	2	0.00425944	1	Celf4 Vrk2
Lhx5	25673412	Hip_circumference_adjusted_for_BMI	53	106	3	0.00426028	1	B4galnt3 Dnm3 L3mbtl3
Zfp263	25014791_21156761_20453842_21505073_20453841_19503088_17554300_28118524_18794853_24782177_23918589_24449572_21844665_21452313_23028356_23143596_22446963_24390342_17804836	Rheumatoid_arthritis	73	251	5	0.00426198	1	Ankrd55 Fads2 Il2rb Rtkn2 Smtnl2
Gli3	28714975	Coronary_artery_disease_(myocardial_infarction,_percutaneous_transluminal_coronary_angioplasty,_coronary_artery_bypass_grafting,_angina_or_chromic_ischemic_heart_disease)	43	131	3	0.00426475	1	Fes Igf2bp1 Svep1
Hoxd11	27723757_19890347_21326295_20526339_20410501_22951725_22561518	Vitiligo	43	39	2	0.004265	1	Tnfrsf11a Ubash3a
Hlf	27723757_19890347_21326295_20526339_20410501_22951725_22561518	Vitiligo	43	39	2	0.004265	1	Ptprc Tef
Dzip1	23263486_21983786_22179738_27899376_25967671_29453348_25646370	Gout	39	43	2	0.004265	1	Abcg2 Vdr
Pou3f1	23703922_22229870_19503597_29558500_18759275_21294900	Uric_acid_levels	16	106	2	0.00426638	1	Abcg2 Arhgap26
Etv1	22293688_18587394_17554261_28067908_26891255_23850713_22412388_17554300_26192919_20570966_17684544_23266558_17435756_22936669_23128233_17804789_21102463_17447842_28008999	Crohn's_disease	113	100	4	0.0042666	1	Fermt1 Nod2 Thada Tnfsf15
Zfp281	23143596	Rheumatoid_arthritis_(ACPA-positive)	24	238	3	0.00427034	1	Gata3 Il2rb Rasgrp1
Nr2f6	27846195	Response_to_paliperidone_in_schizophrenia_(PANSS_score)	19	89	2	0.00427439	1	Adck1 Psd3
Nr1d2	23932459_20010834_20010835_19300500_21946350_17903307	Pulmonary_function	35	48	2	0.00427782	1	Adam19 Ppp1r14c
Mga	22700719_28165464_18758461_21131588_23770605_24292274_26956414	Chronic_lymphocytic_leukemia	35	48	2	0.00427782	1	Bcl2l11 Irf4
Ankzf1	22916037_19043545_20037589_23378610_21909109_22286219_23281178_21931564	Metabolite_levels	48	35	2	0.00427782	1	Gls2 Pnpla3
Gfi1	25637336_27325353_29691431_29313844	Hand_grip_strength	76	149	4	0.00427958	1	Itpr1 Kdm2b Sema6d Trps1
Cic	29875488_28240269	Blood_protein_levels	620	72	8	0.00428147	1	Crispld2 Fas Il15ra Il1r1 Lpp Mapkapk2 Mrc1 Wdr81
Zfp280b	26390057_29403010_28135244_27618447_28739976_29212154_29615537_25249183_28498854_19430483_29208002_21909115_19430479_26969751	Systolic_blood_pressure	112	101	4	0.00428293	1	Fes Furin Itpr1 Nucb2
Mef2b	24827717_28892062_20966902_24064335_24348519_20935630_28448500_25133637_18454148_20397748_27296613_23563607_22344219_28296344_23669352_23583978_17434869_25760438_25673413_26865924_24861553_19079260_19079261_25953783_26426971_22982992_28270201_19851299_22446040	Body_mass_index	235	78	5	0.00428582	1	Auts2 Dgki Ehbp1 Fgf2 Stk39
Hoxd11	22139419_27863252_19221038_22423221_19110211_24026423_19820697	Mean_platelet_volume	145	39	3	0.0042937	1	Bzw2 Cd226 Stard10
Rorc	29875488_28240269	Blood_protein_levels	620	371	24	0.00429674	1	B4galt1 Crispld2 Ecm1 Gnptab H2-Eb1 Havcr2 Igfbp7 Il12rb1 Il1r1 Il1rap Il23r Itih5 Kdelc2 Mgat5 Mmp10 Mrc1 Npc2 Nucb2 Qrich1 Sell Selp Serpinf1 Tg Tmprss6
Smad3	29494758_23273568_18204447_26502338_24871463_23053960_25862617_21044949_21408207_18204098_20169177_29848360_18204446_19165918_28714469_26606652_22291604_26663301_26316170_19838193_19838195_27399966	Systemic_lupus_erythematosus	147	300	8	0.00429884	1	5430427O19Rik Ikzf3 Klf12 Mgat5 Ntng2 Pld2 Slc29a3 Stat4
Sox6	26634245	Post_bronchodilator_FEV1/FVC_ratio	171	107	5	0.00430604	1	Arnt2 Cd74 Dlg2 Kcnc2 Pkhd1
Foxf2	26853712	Craniofacial_microsomia	7	253	2	0.00430952	1	Agap1 Shroom3
Zfp182	18159244_20421936_23563609	Obesity_(early_onset_extreme)	11	157	2	0.00431289	1	Pacs1 Prkch
Ets2	27863252	Reticulocyte_fraction_of_red_cells	106	107	4	0.00432395	1	Arhgef3 S1pr2 Sept9 Sphk1
Irf5	24388013	Asthma_and_hay_fever	9	194	2	0.00432396	1	Ikzf3 Smad3
Gata2	26426971	Body_mass_index_x_sex_x_age_interaction_(4df_test)	9	194	2	0.00432396	1	Ddc Slc22a3
Gata2	22504421_25625606_21116278_28098162	Hippocampal_volume	9	194	2	0.00432396	1	Mctp2 Pard3b
Tcf7l1	28448500	Waist_circumference_adjusted_for_BMI_(joint_analysis_main_effects_and_physical_activity_interaction)	46	123	3	0.00432837	1	Ccdc92 Dnm3 Ncoa1
E2f1	27863252	Eosinophil_percentage_of_white_cells	88	129	4	0.00433107	1	Apbb1ip Nfatc2 Zc3h7b Zfp365
Lhx2	25574825	Inflammatory_skin_disease	36	47	2	0.00433872	1	Exoc2 Mgmt
Zfp429	29273593_21048783	Moyamoya_disease	21	81	2	0.00433945	1	Dock1 Nln
Zfp750	29273593_21048783	Moyamoya_disease	21	81	2	0.00433945	1	Dnm3 Jazf1
Ets2	22837378_29394082	Airflow_obstruction	16	107	2	0.00434529	1	Sema7a Sept9
Sgsm2	18758464_26192919_28067908_17068223_27569725_23128233_28008999	Inflammatory_bowel_disease	130	141	5	0.00435019	1	Cd226 Fermt1 Il10 Sema6d Zfp831
Ppara	18758464_26192919_28067908_17068223_27569725_23128233_28008999	Inflammatory_bowel_disease	130	141	5	0.00435019	1	Ccnd3 Grid2ip Il18r1 Sox5 Zfp831
Maf	25014791_21156761_20453842_21505073_20453841_19503088_17554300_28118524_18794853_24782177_23918589_24449572_21844665_21452313_23028356_23143596_22446963_24390342_17804836	Rheumatoid_arthritis	73	613	8	0.00435501	1	Anxa3 Arhgef3 Fads2 Gata3 Irf5 Jazf1 Rel Stat4
Creb1	26379185	Mild_influenza_(H1N1)_infection	18	95	2	0.00435908	1	Atad2b L3mbtl3
Zfp277	29403010_22286170_27863252	Lymphocyte_counts	96	59	3	0.00436779	1	Dnmt3b Fam49b Ikzf3
Zfp148	25811787	Urate_levels_(BMI_interaction)	6	301	2	0.00436958	1	Erap1 Map3k1
Hmx3	29346644	Disease_progression_in_age-related_macular_degeneration	24	71	2	0.00437144	1	Soat2 Tle4
Tef	29403010_21900944	Aspartate_aminotransferase_levels	17	101	2	0.00438288	1	Cnnm1 Csf1
Bhlhe40	20932654	Erectile_dysfunction_and_prostate_cancer_treatment	10	175	2	0.00438892	1	Cnnm3 Ptgfrn
Bhlhe40	23612905_21900946_22922229_21841780	Graves'_disease	10	175	2	0.00438892	1	Itpr3 Tg
Cux1	24001895_22763476_24903457_23972371_21572416_21909110_19114657_17903302_24954895	Blood_pressure	37	46	2	0.00438978	1	Nxn Stk39
Foxf2	28199695	Itch_intensity_from_mosquito_bite_adjusted_by_bite_size	73	253	5	0.00440713	1	Abcc9 Dlc1 Ivd Myo3b Rasgrf2
Satb1	26174813	Attention_function_in_attention_deficit_hyperactive_disorder	7	256	2	0.00440996	1	Dlg2 Sorcs2
Fos	28193307_29403010_27863252_23314186_25096241	Monocyte_count	92	124	4	0.0044101	1	Bbc3 Dusp14 Rpn1 Tbc1d14
Sox4	28193307_29403010_27863252_23314186_25096241	Monocyte_count	92	124	4	0.0044101	1	Ccnd3 Cnn2 Fam46c Tbc1d14
Cebpb	24388013	Asthma_and_hay_fever	9	196	2	0.00441141	1	Ikzf3 Smad3
Cebpb	22504421_25625606_21116278_28098162	Hippocampal_volume	9	196	2	0.00441141	1	Dpp4 Msrb3
Erg	27723757_19890347_21326295_20526339_20410501_22951725_22561518	Vitiligo	43	268	4	0.0044119	1	Atp8b1 Slc1a2 Tg Ubash3a
Rel	29403010_19198610_27863252	Eosinophil_counts	104	177	5	0.00441444	1	Bcl2a1b Bcl2a1d Il4ra Nfkb1 Smad3
Mef2b	20150558_27989323	Interleukin-18_levels	22	78	2	0.004421	1	Ocln Tmed3
Nfkb1	27846195	Response_to_paliperidone_in_schizophrenia_(negative_Marder_score)	22	264	3	0.004435	1	Nrp1 Psd3 Zfp362
Etv6	27863252	Granulocyte_percentage_of_myeloid_white_cells	90	205	5	0.00443589	1	Cdk6 Dock10 Lpp Sh2d3c Tbc1d14
Smad3	22883433_20185149_18347602_23212062_19571808_23894747_18677311_28991256_18282107_25056061_21926974_22688191_19571811_18332876_21682944_26198764_21679298_23974872_27922604_24043878_22037555_23358160_26531332_22885689_22037552_23142968	Schizophrenia	322	300	13	0.00443919	1	Adam10 Agap1 Bcl11b Frmd4b Gramd1b Klf12 Rtn1 Specc1 Srpk2 Stk4 Trim26 Tspan2 Zfhx3
Prdm16	26634245	Post_bronchodilator_FEV1/FVC_ratio	171	67	4	0.00444153	1	Dlg2 Mgat5 Mocos Plagl1
Ets1	28193307_29403010_27863252_23314186_25096241	Monocyte_count	92	383	7	0.00444739	1	Acvrl1 Bcl2 Gcnt2 Nfkbie Slc9a3r1 Ssh2 Treml2
Erf	29403010_22286170_27863252	Lymphocyte_counts	96	18	2	0.00444907	1	Rilpl2 Zfp36l2
Tcf12	25673412	Hip_circumference_adjusted_for_BMI	53	217	4	0.00444911	1	Adamts17 B4galnt3 Cenpw L3mbtl3
Nfe2	25811787	Urate_levels_(BMI_interaction)	6	304	2	0.00445518	1	Map3k1 Trim9
Hic1	29403010_19198610_27863252	Eosinophil_counts	104	110	4	0.0044581	1	Asb2 Bcl2l11 Lpp Trerf1
Zfp182	27863252	Immature_fraction_of_reticulocytes	73	157	4	0.00446059	1	Bzw2 Thada Tmcc2 Trps1
Osr2	23263486_21983786_22179738_27899376_25967671_29453348_25646370	Gout	39	147	3	0.0044612	1	Abca1 Nrxn2 Slc13a3
Zbtb7a	23000144_26394269_21399635_28062665_19458352_20639880_28425483	Primary_biliary_cholangitis	32	180	3	0.00447135	1	Rps6ka4 Spib Syngr1
Atf5	28813576_26691988	Advanced_age-related_macular_degeneration	23	75	2	0.00447219	1	Abhd2 Trpm1
Zfp367	29403010	Albumin-globulin_ratio	25	69	2	0.00448182	1	Nfkb1 Tbc1d16
Sp3	19656524_28054174_22419666_22863734_20023658	Orofacial_clefts	22	265	3	0.00448208	1	Pak1 Sema4d Zic2
Stat4	27005778	Metabolite_levels_(small_molecules_and_protein_measures)	22	265	3	0.00448208	1	Gls2 Ndrg2 Shroom3
Zfp956	25574825_18364390_25903422_23143594_18369459_25939698_28537254_20953188_20953189_19169255_19169254_20953190	Psoriasis	40	43	2	0.00448238	1	Ikbke Tsc1
Rel	27989323	Interleukin-2_receptor_antagonist_levels	10	177	2	0.00448732	1	Gramd1b Il2ra
Hif3a	22036096_25085501	Allergic_rhinitis	10	177	2	0.00448732	1	Gli3 Prdm16
Gata1	29403010_20139978_28453575_27863252_28017375	Red_blood_cell_count	115	230	6	0.00449164	1	Cacna1c Fbln1 Myb Pfas Tox2 Trps1
Pou5f2	28443625	Waist_circumference_adjusted_for_BMI_(joint_analysis_main_effects_and_smoking_interaction)	42	41	2	0.00449273	1	Kctd19 Loxl1
Srebf1	17903302	Tonometry	9	198	2	0.00449968	1	Prex1 Syne1
Sox15	26831199	Glomerular_filtration_rate_in_non_diabetics_(creatinine)	27	64	2	0.00450457	1	A1cf Nfatc1
Zfp266	27863252	Sum_basophil_neutrophil_counts	64	27	2	0.00450457	1	Atxn1 Cdk6
Myb	21383967	Celiac_disease_or_Rheumatoid_arthritis	13	135	2	0.00450594	1	Mndal Ubash3a
Tbx21	27723758	Selective_IgA_deficiency	13	135	2	0.00450594	1	Cdh23 Gata3
Tcf4	24823311_26584805	Plasma_omega-6_polyunsaturated_fatty_acid_levels_(linoleic_acid)	13	135	2	0.00450594	1	2900011O08Rik Fads2
Fosl1	24945404_28743860	Bone_mineral_density_(paediatric,_total_body_less_head)	7	259	2	0.00451149	1	Fam3c Tnfsf11
Fosl1	21738478	White_blood_cell_types	7	259	2	0.00451149	1	Cdk6 Itga4
Bcl11b	17463246_28371326_28334899_26763881	LDL_cholesterol_levels	33	175	3	0.00451255	1	Fads2 Hmgcr Vldlr
Nr1d2	25574825	Inflammatory_skin_disease	36	48	2	0.00452142	1	Adam19 Il23r
Osr2	27989323	Stem_cell_factor_levels	12	147	2	0.00452562	1	Myo6 Serpine2
Myc	27989323	Granulocyte-colony_stimulating_factor_levels	8	225	2	0.00452788	1	Afap1 Vgll4
Irf1	25245031_24159190	Asymmetrical_dimethylarginine_levels	10	178	2	0.0045369	1	Cacna2d1 Ddah1
Meis1	22610502	Immune_reponse_to_smallpox_(secreted_IFN-alpha)	18	97	2	0.00453993	1	Lpp Sgk1
Nfkb2	27723756	Gut_microbiota_(beta_diversity)	9	199	2	0.00454413	1	Bank1 Vdr
Prdm8	20485516_29760442_23493294_20719862_28171582	Central_corneal_thickness	28	62	2	0.00454854	1	Lpar1 Ltbp1
Klf6	29083406	Allergic_disease_(asthma,_hay_fever_or_eczema)	51	34	2	0.00455021	1	Jazf1 Zfp652
Esr1	28604730	Small_cell_lung_carcinoma	17	103	2	0.00455378	1	Crtam Dlc1
Bhlhe40	24097068_27036123_26780889_26582766_19060911_28270201_25961943_20686565_24886709	Cholesterol,_total	66	175	4	0.00456766	1	Dock7 Phldb1 Trps1 Vldlr
Plagl1	27989323	Interleukin-17_levels	13	136	2	0.00457124	1	Ikzf2 Trib3
Rora	27659466	QRS_complex_(12-leadsum)	13	136	2	0.00457124	1	Mitf Prkca
Ppara	28334899_26763881	HDL_cholesterol_levels	41	141	3	0.00457635	1	Abca1 Ccnd3 Trps1
Batf3	29228715	Colonoscopy-negative_controls_vs_population_controls	47	37	2	0.00457869	1	Clic5 Dock1
Elk3	27629369	Loneliness	7	261	2	0.00457979	1	Adam12 Hdac9
Elk3	27790247	Age-related_diseases_and_mortality	7	261	2	0.00457979	1	Itpk1 Zfhx3
Ar	27863252	Monocyte_percentage_of_white_cells	93	124	4	0.00458304	1	Bcl2a1b Lsp1 Pik3ap1 Sh2d3c
Sox4	27863252	Monocyte_percentage_of_white_cells	93	124	4	0.00458304	1	Ccnd3 Nfkb1 Pik3ap1 Tbc1d14
Foxp3	26528553	Gut_microbiome_composition_(summer)	16	110	2	0.0045861	1	Gli3 Myof
Hic1	22837378_29394082	Airflow_obstruction	16	110	2	0.0045861	1	Itpr1 Sept9
Gata3	27863252	Neutrophil_percentage_of_granulocytes	77	150	4	0.00459163	1	Asb2 Chd7 Exoc2 Pparg
Hey1	24405752_28898252_20849430_22290723_28887542_29621232_20858683_24244560_19096518_29170429_24647736	Glycated_hemoglobin_levels	35	166	3	0.00460497	1	Atad2b Atp11a Smg5
Rela	29875488_28240269	Blood_protein_levels	620	122	11	0.00460817	1	Asph Bcar1 Fn1 H2-Ab1 Mpzl3 Nfat5 Pard3b Rpn1 Serpinf1 Sorcs2 Wisp1
Srebf2	17558408_20190752_18311140_22057235_24999842_23936387	Celiac_disease	32	182	3	0.00461131	1	Icosl Lpp Zfp36l1
Srebf2	25673412	Hip_circumference	32	182	3	0.00461131	1	Calcr Plxnd1 Tcf7l2
Sox21	27863252	Eosinophil_percentage_of_granulocytes	82	141	4	0.00461567	1	Exoc2 Tnfsf8 Zc3h7b Zfp652
Satb1	28443625	Waist-to-hip_ratio_adjusted_for_BMI_(adjusted_for_smoking_behaviour)	23	256	3	0.00462875	1	Bcl2 Ccdc92 Tnfaip8
Zhx3	27863252	Plateletcrit	126	46	3	0.00462972	1	Dip2b Ehd3 Nrf1
Satb1	27863252	Immature_fraction_of_reticulocytes	73	256	5	0.00463144	1	Arid3a Bcl2l11 Cd226 Tln2 Tns1
Nr4a2	21750679_21779181_28314753_20383147_24387989_29293537	Systemic_sclerosis	18	98	2	0.00463165	1	Ikzf2 Stat4
Tead3	22883433_20185149_18347602_23212062_19571808_23894747_18677311_28991256_18282107_25056061_21926974_22688191_19571811_18332876_21682944_26198764_21679298_23974872_27922604_24043878_22037555_23358160_26531332_22885689_22037552_23142968	Schizophrenia	322	83	6	0.00463394	1	Aig1 Asap1 Dlg2 Kif26b Rab8b Srpk2
Meis3	18758464_26192919_28067908_17068223_27569725_23128233_28008999	Inflammatory_bowel_disease	130	89	4	0.00463402	1	Cdyl2 Gpr65 Lpxn Sox5
Zfp449	29403010_27863252_28017375_23263863_28453575_19862010_20139978	Mean_corpuscular_volume	180	10	2	0.00463684	1	Mpp1 Rbpms
Sox5	21383967	Celiac_disease_or_Rheumatoid_arthritis	13	137	2	0.00463699	1	Stat4 Ubash3a
Rreb1	25631615_28073927	Optic_cup_area	11	163	2	0.00464022	1	Dusp1 Trib2
Scmh1	29403010_19198610_27863252	Eosinophil_counts	104	17	2	0.00464038	1	Apbb1ip Foxo1
Zic2	22581228	Fasting_blood_glucose_(BMI_interaction)	17	104	2	0.00464038	1	Kdm2b Rreb1
Aebp2	26831199	Glomerular_filtration_rate_in_non_diabetics_(creatinine)	27	65	2	0.00464309	1	Slc22a2 Ube2q2
Nkx3-1	26379185	Influenza_A_(H1N1)_infection	8	228	2	0.00464645	1	Atad2b Dlg2
Sp4	18758464_26192919_28067908_17068223_27569725_23128233_28008999	Inflammatory_bowel_disease	130	582	11	0.00465886	1	Cd28 Crem Dnmt3b Ets1 Fosl2 Il18r1 Litaf Lpp Notch1 Ptpn2 Rgs14
Irf4	27863252	Reticulocyte_fraction_of_red_cells	106	822	12	0.00466605	1	Atxn1 Bcl2l11 Bmp7 Dnaja4 Fam46c Riok3 S1pr2 Sema4d Sept9 Thrb Tmcc2 Zfpm1
Sp2	21507922_29403010_20172861_27863252_25096241	Neutrophil_count	80	145	4	0.0046669	1	Brd3 Fads2 Ifitm2 Rreb1
Hmx2	20852631_22452962_20585626_22951594_19330030_23535733_17903305_25751625_25327703_24143190_25038754_17529967_29059683_21908515_27117709_23354978_28171663_29058716_23468962_18326623_21424380_22383897_23535729_20872241_19330027_20453838_25956309_22976474_27354352_21263130_17529974_17529973_25824743_22037553	Breast_cancer	286	41	4	0.00467165	1	Bcl2l11 Cdyl2 Hist2h2bb Lekr1
Rxra	20351715	Bipolar_disorder_or_major_depressive_disorder_(combined)	5	381	2	0.00468091	1	Cacna1c Syne1
Rxra	20081857	Two-hour_glucose_challenge	5	381	2	0.00468091	1	Adcy5 Gipr
Nfkb1	19820697	Hematological_parameters	7	264	2	0.00468314	1	Ccnd3 Ptpn11
Nfkb1	27989323	Interleukin-7_levels	7	264	2	0.00468314	1	Atp6v0d2 Paqr8
Nfkb1	26174813	Attention_function_in_attention_deficit_hyperactive_disorder	7	264	2	0.00468314	1	Acoxl Dlg2
Bach1	22566634	Economic_and_political_preferences	10	181	2	0.00468719	1	Cd200r1 Eml6
Bach1	23612905_21900946_22922229_21841780	Graves'_disease	10	181	2	0.00468719	1	Prickle1 Slamf6
Runx2	22883433_20185149_18347602_23212062_19571808_23894747_18677311_28991256_18282107_25056061_21926974_22688191_19571811_18332876_21682944_26198764_21679298_23974872_27922604_24043878_22037555_23358160_26531332_22885689_22037552_23142968	Schizophrenia	322	201	10	0.00468791	1	Agap1 Aig1 Asap1 Dlg2 Epn2 Frmd4b Klf12 Srpk2 Trpm6 Zfhx3
Klf10	25574825_18364390_25903422_23143594_18369459_25939698_28537254_20953188_20953189_19169255_19169254_20953190	Psoriasis	40	44	2	0.00468895	1	Il23r Rps6ka4
Rest	22883433_20185149_18347602_23212062_19571808_23894747_18677311_28991256_18282107_25056061_21926974_22688191_19571811_18332876_21682944_26198764_21679298_23974872_27922604_24043878_22037555_23358160_26531332_22885689_22037552_23142968	Schizophrenia	322	302	13	0.00469093	1	Abcb1a Bcl11b Cacna1c Capn2 Cyp26b1 Dlg2 Fbxo11 Itpr3 Lpp Rassf1 Specc1 Tmtc1 Tspan2
Irf7	27650483_26631737	Urinary_albumin-to-creatinine_ratio	11	164	2	0.00469586	1	Casz1 Thbs3
Nr3c1	25637336_27325353_29691431_29313844	Hand_grip_strength	76	153	4	0.00470051	1	Auts2 Loxl1 Nfat5 Slc39a8
Zfp300	26390057_29403010_28135244_27618447_28739976_28498854	Pulse_pressure	77	23	2	0.0047079	1	Cdk6 Zfp318
Sp6	28443625	Waist_circumference_adjusted_for_BMI_(joint_analysis_main_effects_and_smoking_interaction)	42	139	3	0.004708	1	Cdk6 Dock3 Myo1f
Prdm1	22139419_27863252_19221038_22423221_19110211_24026423_19820697	Mean_platelet_volume	145	184	6	0.00471113	1	Bzw2 Cd226 Dnm3 Ehd3 Fam46c Stard10
Foxc1	22139419_27863252_19221038_22423221_19110211_24026423_19820697	Mean_platelet_volume	145	184	6	0.00471113	1	Asap1 Bcl2 Bzw2 Rassf3 Sidt1 Tbc1d14
Meis1	28199695	Mosquito_bite_size	60	97	3	0.00471381	1	Auts2 Ets1 Lpp
Stat4	27659466	QRS_complex_(Sokolow-Lyon)	7	265	2	0.00471784	1	Cacnb2 Litaf
Stat4	24554482	Response_to_anti-retroviral_therapy_(ddI/d4T)_in_HIV-1_infection_(Grade_3_peripheral_neuropathy)	7	265	2	0.00471784	1	Il2ra Litaf
Stat3	29403010	Albumin-globulin_ratio	25	479	4	0.00472001	1	Hormad2 Il1r1 Tbc1d16 Txlnb
Gata1	26379185	Influenza_A_(H1N1)_infection	8	230	2	0.0047263	1	Dlg2 L3mbtl3
Gata1	22566498	Response_to_angiotensin_II_receptor_blocker_therapy	8	230	2	0.0047263	1	Apbb1ip Jakmip1
Zeb2	29403010_28270201_20383145	Creatinine_levels	34	52	2	0.00472638	1	Rragd Sox5
Stat4	27863252	Platelet_distribution_width	101	265	6	0.00472759	1	Abcd3 Inpp4b Lrch1 Nrip1 Snx9 Tesk2
Creb3l1	20596022_25608926	Alopecia_areata	17	105	2	0.00472774	1	Il2ra Vdac1
Creb3l1	23603761	Juvenile_idiopathic_arthritis_(oligoarticular_or_rheumatoid_factor-negative_polyarticular)	17	105	2	0.00472774	1	Cog6 Il2ra
Xbp1	25865494	Sitting_height_ratio	17	105	2	0.00472774	1	Exoc2 Nfatc2
Xbp1	22581228	Fasting_blood_glucose_(BMI_interaction)	17	105	2	0.00472774	1	Adcy5 Tcf7l2
Ets1	20639881_25279986	Follicular_lymphoma	5	383	2	0.00472913	1	Cd86 Gramd1b
Ovol2	29662059	Depression_(broad)	30	59	2	0.00472962	1	Celf4 Sgip1
Rorc	29083406	Allergic_disease_(asthma,_hay_fever_or_eczema)	51	371	5	0.00473043	1	Foxo1 Il7r Jazf1 Rora Rorc
Nr2f6	27182965	Monobrow	20	89	2	0.00473341	1	Bmp7 Irf4
Sox5	21297633_24837172_26192919_28067908_23511034_19122664_19915572_20848476_25082827_23128233_20228798_20228799_19915573_28008999	Ulcerative_colitis	85	137	4	0.00473743	1	Cacna2d1 Il7r Stat4 Zfp831
Zic2	29403010_27863252_28017375_23263863_28453575_19862010_20139978	Mean_corpuscular_volume	180	104	5	0.00473843	1	Bcl2 Gipr Itsn1 Ppp1r10 Tmc6
Meis2	22139419_27863252_19221038_22423221_19110211_24026423_19820697	Mean_platelet_volume	145	129	5	0.00473844	1	Cd226 Dnm3 Lrch1 Mxd1 Slc24a3
Irf4	27863252	Monocyte_percentage_of_white_cells	93	822	11	0.0047446	1	Acoxl Bcl2 Bcl2l11 Cxcl5 Dock10 Ifitm2 Kdm6b Lsp1 Nfkb1 Sh2d3c Tnfsf10
Ascl4	18758464_26192919_28067908_17068223_27569725_23128233_28008999	Inflammatory_bowel_disease	130	45	3	0.00474742	1	F5 Fermt1 Ifngr2
Tulp3	26390057_29403010_28135244_27618447_28739976_29212154_29615537_25249183_28498854_19430483_29208002_21909115_19430479_26969751	Systolic_blood_pressure	112	16	2	0.00475001	1	Rras Slc39a8
Ybx2	28928442	Measles	16	112	2	0.00475001	1	Dlg2 Sgcg
Tcf3	27863252	High_light_scatter_reticulocyte_count	112	104	4	0.00475228	1	Bsn Fam46c Itga4 Stx7
Stat4	27863252	Myeloid_white_cell_count	71	265	5	0.00475659	1	Atxn1 Cdk6 Chd7 Nlrp3 Rbpms
Ahctf1	22138694_21743469_20062062_23749187	Ankylosing_spondylitis	22	81	2	0.00475887	1	Antxr2 Erap1
Sox4	28158719_27863252_29403010_21738480_21738479_20139978_22037903_25096241	White_blood_cell_count	94	124	4	0.00476049	1	Aim2 Cnn2 Klf3 Pik3r3
Lhx6	24823311_26584805	Plasma_omega-6_polyunsaturated_fatty_acid_levels_(linoleic_acid)	13	139	2	0.0047698	1	2900011O08Rik Il23r
Nkx3-1	29221444	Coronary_artery_calcified_atherosclerotic_plaque_(90_or_130_HU_threshold)_in_type_2_diabetes	26	228	3	0.00477059	1	Arhgef3 Atxn1 Myo1e
Nkx3-1	23259602_21940522_23064961	Dental_caries	26	228	3	0.00477059	1	Abcg2 Maf Nt5dc1
Zfp641	29213071_19305408_19305409_16648850_22726844_24952745_23166209_20031603_23534349	QT_interval	66	27	2	0.00478357	1	Klf12 Litaf
Zfp266	27863252	Sum_neutrophil_eosinophil_counts	66	27	2	0.00478357	1	Atxn1 Cdk6
Arid5a	28199695	Itch_intensity_from_mosquito_bite	33	54	2	0.00479838	1	Mctp2 Runx2
Nfat5	28193307_29403010_27863252_23314186_25096241	Monocyte_count	92	127	4	0.00479983	1	Ehd4 Slc2a1 Ssbp4 Stxbp6
Tcf7l2	26053186	3-hydroxy-1-methylpropylmercapturic_acid_levels_in_smokers	75	156	4	0.00480229	1	Asb2 Celf4 Sfmbt2 Tg
Zfp281	23446634_23935956_23222517_23696099_20927387	Red_blood_cell_traits	25	238	3	0.00480362	1	Acoxl Ccnd3 Hk1
Egr2	25129146	Esophageal_squamous_cell_carcinoma	6	316	2	0.00480543	1	Plce1 Runx1
Egr2	21642993_19698717	Esophageal_cancer	6	316	2	0.00480543	1	Plce1 Runx1
Klf4	28158719_27863252_29403010_21738480_21738479_20139978_22037903_25096241	White_blood_cell_count	94	286	6	0.00480961	1	Acvrl1 Aim2 Atxn1 Ccdc92 Cnn2 Tert
Stat1	29403010_22286170_27863252	Lymphocyte_counts	96	280	6	0.00481237	1	Arhgef3 Dnmt3a Icam1 Lta Ptprc S1pr1
Ankzf1	23307926_19448619_22267201_26414677_24045676_29773799	Menopause_(age_at_onset)	51	35	2	0.00481687	1	Arid3a Helb
Erg	27659466	QRS_complex_(Sokolow-Lyon)	7	268	2	0.00482265	1	Litaf Prkca
Erg	24554482	Response_to_anti-retroviral_therapy_(ddI/d4T)_in_HIV-1_infection_(Grade_3_peripheral_neuropathy)	7	268	2	0.00482265	1	Hdac9 Litaf
Foxo3	17558408_20190752_18311140_22057235_24999842_23936387	Celiac_disease	32	185	3	0.00482621	1	Frmd4b Mttp Ptpn2
Stat3	22293688_18840781_17554260_17554300_19966805_18198356_25751624_17632545_21829393_18978792_21980299_19430480	Type_1_diabetes	40	479	5	0.00483023	1	Cd226 Pgm2 Ptpn2 Skap2 Ubash3a
Prrx1	25245031_24159190	Symmetrical_dimethylarginine_levels	12	152	2	0.00483045	1	Ddah1 Slco3a1
Nfia	23259602_21940522_23064961	Dental_caries	26	69	2	0.00484278	1	Celf2 Sidt1
Gata1	27863252	Eosinophil_percentage_of_granulocytes	82	230	5	0.00484514	1	Apbb1ip Asb2 Auh Ikzf3 Nfkb1
Trps1	25064009_23793441_28011712_24511991_26227905_27182965_28892059_24842889_20711177_21084426_22451204_16252231_21738487_17052657_21044948_22438815_21812969_19915576_19915575_21292315_20070850	Parkinson's_disease	56	32	2	0.00484941	1	Gpr65 Map4k4
Relb	26974007	Chronic_inflammatory_diseases_(ankylosing_spondylitis,_Crohn's_disease,_psoriasis,_primary_sclerosing_cholangitis,_ulcerative_colitis)_(pleiotropy)	93	126	4	0.00485004	1	Ern1 Ifngr2 Il1r1 Zfp365
Bach1	29403010_19198610_27863252	Eosinophil_counts	104	181	5	0.00485009	1	Bcl2a1a Cd200r1 Dock3 Nfkb1 Zfp652
Nfatc4	28928442_27182965_27941131	Tonsillectomy	85	138	4	0.00486076	1	Fosl2 Glcci1 Il2ra Rap1gap2
Etv6	28193307_29403010_27863252_23314186_25096241	Monocyte_count	92	205	5	0.00486991	1	Cdk6 Dock10 Ehd4 Slc2a1 Tbc1d14
Cic	29403010	Albumin-globulin_ratio	25	72	2	0.00487002	1	Il1r1 Tbc1d16
Elk3	29146897_18849991_22693459_27182965	Male-pattern_baldness	23	261	3	0.00488513	1	Cenpw Fam53b Hdac9
Nfe2l2	27397699	Bone_mineral_density_(Ward's_triangle_area)	10	185	2	0.00489116	1	Ccr3 Esr1
Nfe2l2	25245031_24159190	Asymmetrical_dimethylarginine_levels	10	185	2	0.00489116	1	Cacna2d1 Zfp536
Zfp219	25456346_24677629_26114229_27167565_23726511	Post-traumatic_stress_disorder	10	185	2	0.00489116	1	Ankrd55 Ust
Hmga2	22424883	Pulmonary_function_decline	12	153	2	0.00489253	1	Ank1 Svep1
Foxo3	27386562_18941528_20453840_18997785_21654844_21244703_24076602_28445677_21833088_23412934_19010793_20598377_17660530_19525955_22457343_19525953_22190364	Multiple_sclerosis	102	185	5	0.00489749	1	Asap1 Cd86 L3mbtl3 Tef Vav2
Jun	26674333	White_matter_hyperintensities_in_ischemic_stroke	5	390	2	0.00489978	1	Nrcam Pcdh7
Jun	25742292	Number_of_pregnancies	5	390	2	0.00489978	1	Opn3 Syne1
E4f1	24351856_29403010_27588450_23535967	Glomerular_filtration_rate	45	40	2	0.00489986	1	Abcg2 Shroom3
Sgsm2	23583980_21787189	Interstitial_lung_disease	13	141	2	0.00490438	1	Ivd Tert
Ets2	25865494	Sitting_height_ratio	17	107	2	0.00490475	1	Nfatc2 Slc39a8
Ets2	28937693_23743675_21471458_23942779_21270382_27911795	Alcohol_consumption	17	107	2	0.00490475	1	Ccdc63 Lmo1
Tef	21750679_21779181_28314753_20383147_24387989_29293537	Systemic_sclerosis	18	101	2	0.00491195	1	Il12rb2 Stat4
Snai2	27863252	Eosinophil_percentage_of_granulocytes	82	72	3	0.00491496	1	Kdm6b Lpar1 Spsb1
Ncoa1	27225129	Educational_attainment_(years_of_education)	67	27	2	0.00492601	1	Aff3 Atxn1
Zfp641	26785701_25673412_28448500	Waist_circumference_adjusted_for_body_mass_index	67	27	2	0.00492601	1	Adamtsl3 Lin28b
Zfp266	27863252	Granulocyte_count	67	27	2	0.00492601	1	Atxn1 Cdk6
Six5	21546767	Dialysis-related_mortality	7	271	2	0.00492854	1	Pdzrn3 Tet3
Smad4	27863252	Reticulocyte_count	97	61	3	0.00493758	1	Bcl2 Sema4d Trps1
Tead1	27863252	Sum_neutrophil_eosinophil_counts	66	288	5	0.00493907	1	Cdk6 Il1rn S1pr2 Stxbp6 Thada
Rel	29875488_28240269	Blood_protein_levels	620	177	14	0.00493985	1	Atp8b4 B3gnt8 Csf2rb2 Cx3cl1 H2-Eb1 Icam1 Lamc1 Lct Nfat5 Rad52 Rpn1 St3gal1 Tgfbi Vsig2
Pparg	29875488_28240269	Blood_protein_levels	620	177	14	0.00493985	1	Acot11 Bank1 C3 Cxcl5 Erap1 Havcr2 Ifi203 Itih5 Mapkapk2 Mgat5 Mrc1 Slamf7 Tnfrsf11a Vsig2
Foxf2	26053186	3-hydroxy-1-methylpropylmercapturic_acid_levels_in_smokers	75	253	5	0.00494584	1	Itpr1 Lama5 Nhsl2 Ptprj Runx2
Runx3	25064009_23793441_28011712_24511991_26227905_27182965_28892059_24842889_20711177_21084426_22451204_16252231_21738487_17052657_21044948_22438815_21812969_19915576_19915575_21292315_20070850	Parkinson's_disease	56	106	3	0.00497447	1	Cnksr3 Dlg2 Map4k4
Hmg20b	23259602_21940522_23064961	Dental_caries	26	70	2	0.0049806	1	Maf Nt5dc1
Stat3	25811787	Urate_levels_in_obese_individuals	13	479	3	0.00498271	1	Abcg2 Lgr4 Myo3b
Zfp39	22883433_20185149_18347602_23212062_19571808_23894747_18677311_28991256_18282107_25056061_21926974_22688191_19571811_18332876_21682944_26198764_21679298_23974872_27922604_24043878_22037555_23358160_26531332_22885689_22037552_23142968	Schizophrenia	322	6	2	0.00498527	1	Gigyf2 Trim26
Foxc1	29255261_27089181_23229837_27918536_20634892_25993607_29292387_17667963_18762592_27067015	Neuroticism	103	184	5	0.00498878	1	Arpp21 Sox6 Tmem163 Vrk2 Zcchc14
Meis2	17658951_22013104_23251661	Obesity-related_traits	351	129	8	0.00499043	1	Bmp2 Celf2 Dapl1 Dcc Fam129a Hdac9 Lhpp Mdga2
Glis2	27005778	Metabolite_levels_(small_molecules_and_protein_measures)	22	83	2	0.00499057	1	Gls2 Ndrg2
Stat4	24351856_29403010_27588450_23535967	Glomerular_filtration_rate	45	265	4	0.00499716	1	Abcg2 Gab2 Rragd Shroom3
Zfp263	29403010_27863252_28017375_23263863_28453575_19862010_20139978	Mean_corpuscular_volume	180	251	8	0.00499864	1	Atad2b Atp2b4 Bcl2 Fam46c Slc6a9 Tert Unc119b Zfpm1
Zbtb46	28199695	Itch_intensity_from_mosquito_bite_adjusted_by_bite_size	73	25	2	0.00500276	1	Dlc1 Wnt3
Ets1	28158719_27863252_29403010_21738480_21738479_20139978_22037903_25096241	White_blood_cell_count	94	383	7	0.00500458	1	Acvrl1 Chd7 Eml6 Fam53b Gabbr1 Klf3 Ssh2
Sp9	28540026	Autism_spectrum_disorder_or_schizophrenia	64	93	3	0.00502262	1	Gramd1b H2-Ab1 Trim26
Zfp105	18758464_26192919_28067908_17068223_27569725_23128233_28008999	Inflammatory_bowel_disease	130	146	5	0.00503873	1	H2-Aa Hormad2 Map3k8 Notch1 Sbno2
Cebpb	27863252	Reticulocyte_count	97	196	5	0.00504621	1	Bcl2 Fam46c Sept9 Smox Thrb
Zfp281	26379185	Influenza_A_(H1N1)_infection	8	238	2	0.0050521	1	Dmd L3mbtl3
Zfp263	27863252	Lymphocyte_percentage_of_white_cells	76	251	5	0.00506108	1	Ehd4 Ets1 Icam5 Mxd3 Nlrc5
Rel	28928442_29036319_25774636_26767831_20694014_24057671	Tuberculosis	34	177	3	0.00507039	1	Dusp14 H2-Eb1 Rell1
Rel	28928442_27182965	Childhood_ear_infection	34	177	3	0.00507039	1	Auts2 Chm Fam53b
Tcf7l2	23740937	Systemic_lupus_erythematosus_and_Systemic_sclerosis	12	156	2	0.00508101	1	Lamc2 Stat4
Epas1	24514567_21079607_23568457_28494655	Anorexia_nervosa	16	116	2	0.00508592	1	Mctp1 Ppp3ca
Tbx21	27863252	Eosinophil_percentage_of_white_cells	88	135	4	0.00508684	1	Ankrd33b Bcl2a1b Bcl2l11 Rasgrp4
Tcf4	27863252	Eosinophil_percentage_of_white_cells	88	135	4	0.00508684	1	Bcl2 Klf3 Nfkb1 Zfp365
Mitf	28928442_27182965	Childhood_ear_infection	34	54	2	0.00508807	1	Chm Ift81
Peg3	29198719	Lobe_attachment_(rater-scored_or_self-reported)	54	34	2	0.00508807	1	Ddah1 Nbea
Ppard	29499414	Lumbar_spine_bone_mineral_density	15	124	2	0.00508993	1	Smad3 Tnfrsf11a
Nkx1-2	28443625	Body_mass_index_(joint_analysis_main_effects_and_smoking_interaction)	36	51	2	0.00509059	1	Calcr Dmxl2
Nkx1-2	28443625	BMI_(adjusted_for_smoking_behaviour)	36	51	2	0.00509059	1	Calcr Dmxl2
Zeb1	27182965	Allergy	11	171	2	0.00509411	1	Lpp Smad3
Etv6	27863252	Monocyte_percentage_of_white_cells	93	205	5	0.00509784	1	Cdk6 Dock10 Lpp Sh2d3c Tbc1d14
Etv6	26974007	Chronic_inflammatory_diseases_(ankylosing_spondylitis,_Crohn's_disease,_psoriasis,_primary_sclerosing_cholangitis,_ulcerative_colitis)_(pleiotropy)	93	205	5	0.00509784	1	Bsn Ern1 Il10 Skap2 Ubash3a
Nr3c1	24827717_28892062_20966902_24064335_24348519_20935630_28448500_25133637_18454148_20397748_27296613_23563607_22344219_28296344_23669352_23583978_17434869_25760438_25673413_26865924_24861553_19079260_19079261_25953783_26426971_22982992_28270201_19851299_22446040	Body_mass_index	235	153	7	0.00510755	1	Auts2 Bace2 Cadm1 Dgki Dmd Fgf2 Slc39a8
Thap1	25014791_21156761_20453842_21505073_20453841_19503088_17554300_28118524_18794853_24782177_23918589_24449572_21844665_21452313_23028356_23143596_22446963_24390342_17804836	Rheumatoid_arthritis	73	82	3	0.00510818	1	Jazf1 Rasgrp1 Rpp14
Zhx3	25574825_18364390_25903422_23143594_18369459_25939698_28537254_20953188_20953189_19169255_19169254_20953190	Psoriasis	40	46	2	0.00511508	1	Exoc2 Tsc1
Zfp750	29494758_23273568_18204447_26502338_24871463_23053960_25862617_21044949_21408207_18204098_20169177_29848360_18204446_19165918_28714469_26606652_22291604_26663301_26316170_19838193_19838195_27399966	Systemic_lupus_erythematosus	147	81	4	0.00511914	1	Cd80 Jazf1 Scamp5 Tnfsf4
Rbpj	22883433_20185149_18347602_23212062_19571808_23894747_18677311_28991256_18282107_25056061_21926974_22688191_19571811_18332876_21682944_26198764_21679298_23974872_27922604_24043878_22037555_23358160_26531332_22885689_22037552_23142968	Schizophrenia	322	112	7	0.00511974	1	Abcb1a Cacna1c Capn2 H2-Ob Plcl1 Rhbdl3 Zfhx3
Ybx2	22883433_20185149_18347602_23212062_19571808_23894747_18677311_28991256_18282107_25056061_21926974_22688191_19571811_18332876_21682944_26198764_21679298_23974872_27922604_24043878_22037555_23358160_26531332_22885689_22037552_23142968	Schizophrenia	322	112	7	0.00511974	1	Dlg2 H2-Ob Lrp4 Psd3 Rtn1 Sh3gl3 Ttyh3
[truncated: 7,543 more rows]
