# Supplementary material for: Leveraging chromatin accessibility for transcriptional regulatory network inference in T Helper 17 Cells
Source: HighWire-hosted journal article supplement (doi:10.1101/gr.238253.118), 2019-01-29
Supplement: Supplemental_infTRN_lassoStARS.zip [file glmnetMex.pdf › infTRN_lassoStARS-master/glmnet/glmnetMex.pdf]

```

include "fintrf.h" C glmnetMex.F C C Lasso and elastic-net regularized generalized linear models
C [a0,ca,ia,nin,rsq,alm,nlp,jerr] = ... C glmnetMex(parm,x,y,jd,vp,ne,nx,nlam,fmin,ulam,thr,isd,w,ka) C
[a0,ca,ia,nin,dev,alm,nlp,jerr] = ... C glmnetMex(parm,x,y,jd,vp,ne,nx,nlam,fmin,ulam,thr,isd,nc,maxit,kopt)
C C Extremely efficient procedures for fitting the entire lasso or C elastic-net regularization path for linear
regression, logistic and C multinomial regression models. The algorithm uses cyclical coordinate C descent
in a pathwise as described in the paper on the maintainer's C website. C C NOTES: This is a MEX-file
wrapper of GLMnet.f for MATLAB. Should be called C only by glmnet.m. For details about input and
output arguments, see C GLMnet.f. C C LICENSE: GPL-2 C C DATE: 13 Jul 2009 C C AUTHORS: C
Algorithm designed by Jerome Friedman, Trevor Hastie and Rob Tibshirani C Fortran code written by
Jerome Friedman C MATLAB wrapper written and maintained by Hui Jiang, jiangh@stanford.edu C De-
partment of Statistics, Stanford University, Stanford, California, USA. C C REFERENCES: C Friedman, J.,
Hastie, T. and Tibshirani, R. (2009) C Regularization Paths for Generalized Linear Models via Coordinate
Descent. C Journal of Statistical Software, 33(1), 2010 C C EXAMPLE: C parm = 1.0; C x = [1 1; 2 2;
3 3]; C y = [1 3 2]'; C jd = 0; C vp = [1 1]'; C ne = 3; C nx = 2; C nlam = 100; C fmin = 0.0001; C
ulam = 0; C thr = 1.0e-4; C isd = 1; C w = [1 1 1]'; C ka = 2; C [a0,ca,ia,nin,rsq,alm,nlp,jerr] = glm-
netMex(parm,x,y,jd,vp,ne,nx,nlam,fmin,ulam,thr,isd,w,ka) C C DEVELOPMENT: 13 Jul 2009: Original
version of glmnetMex.f written. C C_____
subroutine mexFunction(nlhs, plhs, nrhs, prhs) C_____
C (pointer) Replace integer by integer*8 on the DEC Alpha C 64-bit platform
mwpointer plhs(*), prhs(*) mwpointer mxCreateDoubleMatrix, mxGetPr mwpointer mxGetIr, mxGetJc
integer nlhs, nrhs mwsizex mxGetM, mxGetN, mxGetNzmax integer mxIsNumeric integer mxIsSparse
C_____
C Input real parm,fmin,thr,intr integer ka,no,ni,nc,ne,nx,nlam,isd,maxit,kopt,isparsen,nzmax integer, di-
mension (2) :: dimx real, dimension (:), allocatable :: x,y,w,vp,ulam,cl,sr integer, dimension (:), allocatable
:: ix,jx,jd,irs,jcs
mwpointer pr
C Output integer lmu,nlp,jerr real, dimension (:), allocatable :: a0,ca,alm,dev,rsq integer, dimension (:),
allocatable :: ia,nin
C Temporary mwpointer tempp,rmwsizetempm,tempn,tempnzmaxintegertask,i
C For internal parameters real fdev, devmax, eps, big, pmin, prec integer mnlam, exmx, mxit
C Check for proper number of arguments.
if(nrhs .eq. 18 .and. nlhs .eq. 8) then task = 1; elseif(nrhs .eq. 15 .and. nlhs .eq. 8) then task = 2;
elseif(nrhs .eq. 0) then task = 3; elseif(nrhs .eq. 9) then task = 4; else call mexErrMsgTxt('Incorrect number
of arguments.') endif
C Get input
if (task .eq. 3) then call getintparms(fdev, eps, big, mnlam, devmax, pmin, exmx)callgetinorm(prec, mxit)
plhs(1) = mxCreateDoubleMatrix(1,1,0) temppr = mxGetPr(plhs(1))callputreal(fdev, temppr, 1)
plhs(2) = mxCreateDoubleMatrix(1,1,0) temppr = mxGetPr(plhs(2))callputreal(devmax, temppr, 1)
plhs(3) = mxCreateDoubleMatrix(1,1,0) temppr = mxGetPr(plhs(3))callputreal(eps, temppr, 1)
plhs(4) = mxCreateDoubleMatrix(1,1,0) temppr = mxGetPr(plhs(4))callputreal(big, temppr, 1)
plhs(5) = mxCreateDoubleMatrix(1,1,0) temppr = mxGetPr(plhs(5))callputinteger(mnlam, temppr, 1)
plhs(6) = mxCreateDoubleMatrix(1,1,0) temppr = mxGetPr(plhs(6))callputreal(pmin, temppr, 1)
plhs(7) = mxCreateDoubleMatrix(1,1,0) temppr = mxGetPr(plhs(7))callputinteger(exmx, temppr, 1)
plhs(8) = mxCreateDoubleMatrix(1,1,0) temppr = mxGetPr(plhs(8))callputreal(prec, temppr, 1)
plhs(9) = mxCreateDoubleMatrix(1,1,0) temppr = mxGetPr(plhs(9))callputinteger(mxit, temppr, 1)elseif(task.eq.4)th
mxGetPr(prhs(1))callgetreal(temppr, fdev, 1)
temppr = mxGetPr(prhs(2))callgetreal(temppr, devmax, 1)
temppr = mxGetPr(prhs(3))callgetreal(temppr, eps, 1)
temppr = mxGetPr(prhs(4))callgetreal(temppr, big, 1)
temppr = mxGetPr(prhs(5))callgetinteger(temppr, mnlam, 1)
temppr = mxGetPr(prhs(6))callgetreal(temppr, pmin, 1)
temppr = mxGetPr(prhs(7))callgetinteger(temppr, exmx, 1)
temppr = mxGetPr(prhs(8))callgetreal(temppr, prec, 1)

```

```

temppr = mxGetPr(prhs(9))callgetinteger(temppr, mxit, 1)
call chgfractdev(fdev)callchgdevmax(devmax)callchgminflmin(eps)callchgbig(big)callchgminlambdas(mnlam)callchg
else
temppr = mxGetPr(prhs(1))callgetreal(temppr, parm, 1)
c

```

isparse = mxIsSparse(prhs(2)) if (1 .eq. 1) then c

temp<sub>n</sub>zmax = mxGetNzmax(prhs(2))c

nzmax = temp<sub>n</sub>zmaxc

temp<sub>p</sub>r = mxGetPr(prhs(18))c

callgetinteger(temp<sub>p</sub>r, dimx, 2)c

no = dimx(1)c

ni = dimx(2)c

allocate(sr(1 : nzmax))c

allocate(irs(1 : nzmax))c

allocate(jcs(1 : (ni + 1)))c

temp<sub>p</sub>r = mxGetPr(prhs(2))c

callgetreal(temp<sub>p</sub>r, sr, nzmax)c

temp<sub>p</sub>r = mxGetIr(prhs(2))c

callgetinteger(temp<sub>p</sub>r, irs, nzmax)c

doi = 1, nzmaxc

irs(i) = irs(i) + 1c

enddoc

temp<sub>p</sub>r = mxGetJc(prhs(2))c

callgetinteger(temp<sub>p</sub>r, jcs, ni + 1)c

doi = 1, (ni + 1)c

jcs(i) = jcs(i) + 1c

enddo

allocate(sr(1:5)) allocate(irs(1:5)) allocate(jcs(1:5))

no = 4; ni = 4

sr(1) = 1; sr(2) = 2; sr(3) = 10; sr(4) = 3; sr(5) = 4; irs(1) = 1; irs(2) = 2; irs(3) = 4; irs(4) = 3; irs(5)  
= 4; jcs(1) = 1; jcs(2) = 2; jcs(3) = 4; jcs(4) = 5; jcs(5) = 6;

else temp<sub>p</sub>r = mxGetPr(prhs(2))temp<sub>m</sub> = mxGetM(prhs(2))no = temp<sub>m</sub>temp<sub>n</sub> = mxGetN(prhs(2))ni =  
temp<sub>n</sub>allocate(x(1 : no \* ni))callgetreal(temp<sub>p</sub>r, x, no \* ni)

endif

temp<sub>p</sub>r = mxGetPr(prhs(4))temp<sub>m</sub> = mxGetM(prhs(4))temp<sub>n</sub> = mxGetN(prhs(4))allocate(jd(temp<sub>m</sub>\*  
temp<sub>n</sub>))callgetinteger(temp<sub>p</sub>r, jd, temp<sub>m</sub> \* temp<sub>n</sub>)

temp<sub>p</sub>r = mxGetPr(prhs(5))allocate(vp(1 : ni))callgetreal(temp<sub>p</sub>r, vp, ni)

temp<sub>p</sub>r = mxGetPr(prhs(6))callgetinteger(temp<sub>p</sub>r, ne, 1)

temp<sub>p</sub>r = mxGetPr(prhs(7))callgetinteger(temp<sub>p</sub>r, nx, 1)

temp<sub>p</sub>r = mxGetPr(prhs(8))callgetinteger(temp<sub>p</sub>r, nlam, 1)

temp<sub>p</sub>r = mxGetPr(prhs(9))callgetreal(temp<sub>p</sub>r, flmin, 1)

temp<sub>p</sub>r = mxGetPr(prhs(10))temp<sub>m</sub> = mxGetM(prhs(10))temp<sub>n</sub> = mxGetN(prhs(10))allocate(ulam(1 :  
temp<sub>m</sub> \* temp<sub>n</sub>))callgetreal(temp<sub>p</sub>r, ulam, temp<sub>m</sub> \* temp<sub>n</sub>)

```

temppr = mxGetPr(prhs(11))callgetreal(temppr, thr, 1)
temppr = mxGetPr(prhs(12))callgetinteger(temppr, isd, 1)
if (task .eq. 1) then temppr = mxGetPr(prhs(3))allocate(y(1 : no))callgetreal(temppr, y, no)
temppr = mxGetPr(prhs(13))allocate(w(1 : no))callgetreal(temppr, w, no)
temppr = mxGetPr(prhs(14))callgetinteger(temppr, ka, 1)
temppr = mxGetPr(prhs(15))allocate(cl(1 : 2 * ni))callgetreal(temppr, cl, 2 * ni)
temppr = mxGetPr(prhs(16))callgetinteger(temppr, intr, 1)
temppr = mxGetPr(prhs(17))callgetinteger(temppr, maxit, 1)
elseif (task .eq. 2) then temppr = mxGetPr(prhs(13))callgetinteger(temppr, nc, 1)
temppr = mxGetPr(prhs(14))callgetinteger(temppr, maxit, 1)
temppr = mxGetPr(prhs(15))callgetinteger(temppr, kopt, 1)
temppr = mxGetPr(prhs(3))allocate(y(1 : no*(max(2, nc))))callgetreal(temppr, y, no*(max(2, nc)))endif
C Allocate memory for output allocate(ia(1:nx)) call zerointeger(ia,nx) allocate(nin(1:nlam)) call ze-
rointeger(nin,nlam) allocate(alm(1:nlam)) call zeroreal(alm,nlam) if (task .eq. 1) then allocate(a0(1:nlam))
call zeroreal(a0,nlam)
allocate(ca(1:nx*nlam)) call zeroreal(ca,nx*nlam)
allocate(rsq(1:nlam)) call zeroreal(rsq,nlam) elseif (task .eq. 2) then allocate(a0(1:nc*nlam)) call zero-
real(a0,nc*nlam)
allocate(ca(1:nx*nc*nlam)) call zeroreal(ca,nx*nc*nlam)
allocate(dev(1:nlam)) call zeroreal(dev,nlam)
endif
C Call glmnet lmu = 0 nlp = 0 jerr = 1 if (task .eq. 1) then if (ispars .ne. 1) then call elnet(ka,parm,no,ni,x,y,w,jd,vp,cl,ne,
ulam, thr, isd, intr, maxit, lmu, a0, ca, ia, nin, rsq, alm, nlp, jerr) else call spelnet(ka,parm,no,ni,sr,jcs,irs,y,w,jd,vp,cl,ne,nx,
nlam, flmin, ulam, thr, isd, intr, maxit, lmu, a0, ca, ia, nin, rsq,alm,nlp,jerr) endif elseif (task .eq. 2) then
call lognet(parm,no,ni,nc,x,y,jd,vp,ne,nx,nlam,flmin,ulam,t hr, isd, maxit, kopt, lmu, a0, ca, ia, nin, dev, alm, nlp, jerr)endif
C Prepare output plhs(3) = mxCreateDoubleMatrix(nx,1,0) temppr = mxGetPr(plhs(3))callputinteger(ia, temppr, nx)
plhs(4) = mxCreateDoubleMatrix(lmu,1,0) temppr = mxGetPr(plhs(4))callputinteger(nin, temppr, lmu)
plhs(6) = mxCreateDoubleMatrix(lmu,1,0) temppr = mxGetPr(plhs(6))callputreal(alm, temppr, lmu)
plhs(7) = mxCreateDoubleMatrix(1,1,0) temppr = mxGetPr(plhs(7))callputinteger(nlp, temppr, 1)
plhs(8) = mxCreateDoubleMatrix(1,1,0) temppr = mxGetPr(plhs(8))callputinteger(jerr, temppr, 1)
if (task .eq. 1) then plhs(1) = mxCreateDoubleMatrix(lmu,1,0) temppr = mxGetPr(plhs(1))callputreal(a0, temppr, lmu)
plhs(2) = mxCreateDoubleMatrix(nx,lmu,0) temppr = mxGetPr(plhs(2))callputreal(ca, temppr, nx *
lmu)
plhs(5) = mxCreateDoubleMatrix(lmu,1,0) temppr = mxGetPr(plhs(5))callputreal(rsq, temppr, lmu)elseif (task.eq.2) then
mxCreateDoubleMatrix(nc, lmu, 0)temppr = mxGetPr(plhs(1))callputreal(a0, temppr, nc * lmu)
plhs(2) = mxCreateDoubleMatrix(nx*nc,lmu,0) temppr = mxGetPr(plhs(2))callputreal(ca, temppr, nx*
nc * lmu)
plhs(5) = mxCreateDoubleMatrix(lmu,1,0) temppr = mxGetPr(plhs(5))callputreal(dev, temppr, lmu)endif
C Deallocate memory deallocate(x) deallocate(y) deallocate(jd) deallocate(vp) deallocate(ulam) deallo-
cate(a0) deallocate(ca) deallocate(ia) deallocate(nin) deallocate(alm)
C For logistic elastic net if (task .eq. 1) then deallocate(w) deallocate(rsq) deallocate(cl) if (ispars .eq.
1) then deallocate(sr) deallocate(irs) deallocate(jcs) endif elseif (task .eq. 2) then deallocate(dev) endif endif
return end
C End of subroutine mexFunction
subroutine real8storeal(x, y, size) integer size real*8 x(size) real y(size) do 10 i=1,size y(i)= x(i) 10
continue return end
subroutine reall8real8(x, y, size) integer size real x(size) real*8 y(size) do 20 i=1,size y(i)= x(i) 20
continue return end
subroutine real8tointeger(x, y, size) integer size real*8 x(size) integer y(size) do 30 i=1,size y(i)= x(i)
30 continue return end
subroutine integertoreal8(x, y, size) integer size integer x(size) real*8 y(size) do 40 i=1,size y(i)= x(i)
40 continue return end

```

```

subroutine getreal(pr,x,size) mwpointer pr integer size real x(size) real*8, dimension (:), allocatable ::
temp allocate(temp(1:size)) call mxCopyPtrToReal8(pr,temp,size) call real8toreal(temp,x,size) deallocate(temp)
return end

subroutine getinteger(pr,x,size) mwpointer pr integer size integer x(size) real*8, dimension (:), allocatable :: temp
allocate(temp(1:size)) call mxCopyPtrToReal8(pr,temp,size) call real8tointeger(temp,x,size) deallocate(temp) return end

subroutine putreal(x,pr,size) mwpointer pr integer size real x(size) real*8, dimension (:), allocatable :: temp
allocate(temp(1:size)) call realtoreal8(x,temp,size) call mxCopyReal8ToPtr(temp,pr,size) deallocate(temp) return end

subroutine putinteger(x,pr,size) mwpointer pr integer size integer x(size) real*8, dimension (:), allocatable :: temp
allocate(temp(1:size)) call integertoreal8(x,temp,size) call mxCopyReal8ToPtr(temp,pr,size) deallocate(temp) return end

subroutine zeroreal(x,size) integer size real x(size) do 90 i=1,size x(i) = 0 90 continue return end

subroutine zerointeger(x,size) integer size integer x(size) do 100 i=1,size x(i) = 0 100 continue return end
end

```
